# Supplementary material
Source: PubMed Central journal article supplement (PMC4587596)
Supplement: supp_00369.2011_suppmat.pdf [file supp_00369.2011_suppmat.pdf]

**Supplemental Table S1.** Differentially expressed genes (1% FDR) in response to systemic LPS.**(A)** B6129 F2 mice 6 hours post-LPS

| PROBE        | ACCESSION     | SYMBOL | ENTREZID | DESCRIPTION                                                 | Score (d) | LPS/saline |             |
|--------------|---------------|--------|----------|-------------------------------------------------------------|-----------|------------|-------------|
|              |               |        |          |                                                             |           | fold       | q-value (%) |
| A_51_P432641 | NM_021274     | Cxcl10 | 15945    | chemokine (C-X-C motif) ligand 10                           | 9.11      | 220.15     | 0.00        |
| A_52_P446431 | NM_010846     | Mx1    | 17857    | myxovirus (influenza virus) resistance 1                    | 13.43     | 197.07     | 0.00        |
| A_51_P327751 | NM_008331     | Ifit1  | 15957    | interferon-induced protein with tetratricopeptide repeats 1 | 11.68     | 191.63     | 0.00        |
| A_51_P505132 | NM_021384     | Rsad2  | 58185    | radical S-adenosyl methionine domain containing 2           | 9.44      | 163.82     | 0.00        |
| A_51_P505134 | NM_021384     | Rsad2  | 58185    | radical S-adenosyl methionine domain containing 2           | 9.53      | 148.92     | 0.00        |
| A_51_P161021 | NM_008332     | Ifit2  | 15958    | interferon-induced protein with tetratricopeptide repeats 2 | 10.10     | 133.14     | 0.00        |
| A_52_P670026 | NM_021384     | Rsad2  | 58185    | radical S-adenosyl methionine domain containing 2           | 8.74      | 123.95     | 0.00        |
| A_52_P186937 | NM_020557     | Cmpk2  | 22169    | cytidine monophosphate (UMP-CMP) kinase 2, mitochondrial    | 9.82      | 122.96     | 0.00        |
| A_51_P509573 | NM_013652     | Ccl4   | 20303    | chemokine (C-C motif) ligand 4                              | 12.17     | 120.92     | 0.00        |
| A_51_P203955 | NM_010260     | Gbp2   | 14469    | guanylate binding protein 2                                 | 6.91      | 110.75     | 0.00        |
| A_52_P542388 | NM_008332     | Ifit2  | 15958    | interferon-induced protein with tetratricopeptide repeats 2 | 11.64     | 101.52     | 0.00        |
| A_51_P279606 | NM_009896     | Socs1  | 12703    | suppressor of cytokine signaling 1                          | 7.14      | 97.44      | 0.00        |
| A_51_P232682 | NM_017466     | Ccr12  | 54199    | chemokine (C-C motif) receptor-like 2                       | 9.42      | 91.92      | 0.00        |
| A_51_P123625 | AK152177      | Irg1   | 16365    | immunoresponsive gene 1                                     | 7.94      | 83.59      | 0.00        |
| A_51_P100852 | NM_175449     | Fam26f | 215900   | family with sequence similarity 26, member F                | 9.63      | 83.06      | 0.00        |
| A_52_P327664 | NM_153564     | Gbp5   | 229898   | guanylate binding protein 5                                 | 9.37      | 78.26      | 0.00        |
| A_51_P434737 | NM_001040; NA | NA     | NA       | NA                                                          | 6.77      | 74.34      | 0.00        |
| A_51_P452629 | NM_011905     | Tlr2   | 24088    | toll-like receptor 2                                        | 11.39     | 73.82      | 0.00        |
| A_52_P334593 | NM_017466     | Ccr12  | 54199    | chemokine (C-C motif) receptor-like 2                       | 9.12      | 72.89      | 0.00        |
| A_52_P189772 | NM_194336     | Mpa2l  | 100702   | macrophage activation 2 like                                | 8.84      | 71.93      | 0.00        |
| A_51_P123630 | L38281        | Irg1   | 16365    | immunoresponsive gene 1                                     | 7.42      | 69.89      | 0.00        |
| A_51_P140710 | NM_011337     | Ccl3   | 20302    | chemokine (C-C motif) ligand 3                              | 8.25      | 66.24      | 0.00        |

|              |           |           |        |                                                                                                                   |       |       |      |
|--------------|-----------|-----------|--------|-------------------------------------------------------------------------------------------------------------------|-------|-------|------|
| A_51_P164219 | NM_011909 | Usp18     | 24110  | ubiquitin specific peptidase 18                                                                                   | 9.48  | 64.53 | 0.00 |
| A_51_P248666 | NM_021893 | Cd274     | 60533  | CD274 antigen                                                                                                     | 8.66  | 64.00 | 0.00 |
| A_51_P286737 | NM_011333 | Ccl2      | 20296  | chemokine (C-C motif) ligand 2                                                                                    | 5.71  | 63.89 | 0.00 |
| A_51_P461665 | NM_008599 | Cxcl9     | 17329  | chemokine (C-X-C motif) ligand 9                                                                                  | 6.44  | 63.82 | 0.00 |
| A_51_P398766 | NM_010259 | Gbp1      | 14468  | guanylate binding protein 1                                                                                       | 2.88  | 63.43 | 0.00 |
| A_51_P184484 | NM_008607 | Mmp13     | 17386  | matrix metalloproteinase 13                                                                                       | 10.24 | 62.71 | 0.00 |
| A_52_P663686 | AK077243  | I830012O1 | 667370 | RIKEN cDNA I830012O16 gene                                                                                        | 9.81  | 61.36 | 0.00 |
| A_51_P400190 | NM_020557 | Cmpk2     | 22169  | cytidine monophosphate (UMP-CMP) kinase 2,<br>mitochondrial                                                       | 8.99  | 60.56 | 0.00 |
| A_51_P359570 | NM_010501 | Ifit3     | 15959  | interferon-induced protein with tetratricopeptide<br>repeats 3                                                    | 9.22  | 56.07 | 0.00 |
| A_51_P436652 | NM_013654 | Ccl7      | 20306  | chemokine (C-C motif) ligand 7                                                                                    | 8.00  | 54.68 | 0.00 |
| A_52_P653054 | NA        | NA        | NA     | NA                                                                                                                | 8.99  | 53.45 | 0.00 |
| A_51_P485312 | NM_013653 | Ccl5      | 20304  | chemokine (C-C motif) ligand 5                                                                                    | 7.84  | 53.30 | 0.00 |
| A_52_P638459 | BC033508  | Ccl5      | 20304  | chemokine (C-C motif) ligand 5                                                                                    | 7.59  | 52.36 | 0.00 |
| A_51_P488739 | NM_030701 | Niacr1    | 80885  | niacin receptor 1                                                                                                 | 9.47  | 52.27 | 0.00 |
| A_51_P437309 | NM_145209 | Oasl1     | 231655 | 2'-5' oligoadenylate synthetase-like 1                                                                            | 9.30  | 51.73 | 0.00 |
| A_52_P480044 | NA        | NA        | NA     | NA                                                                                                                | 8.92  | 51.24 | 0.00 |
| A_52_P431159 | NM_001039 | Il1rn     | 16181  | interleukin 1 receptor antagonist                                                                                 | 6.04  | 48.04 | 0.00 |
| A_52_P399934 | NM_010090 | Dusp2     | 13537  | dual specificity phosphatase 2                                                                                    | 9.66  | 47.59 | 0.00 |
| A_52_P412417 | NM_009397 | Tnfaip3   | 21929  | tumor necrosis factor, alpha-induced protein 3                                                                    | 8.10  | 46.91 | 0.00 |
| A_52_P676510 | NM_011579 | Tgtp      | 21822  | T-cell specific GTPase                                                                                            | 8.24  | 45.05 | 0.00 |
| A_51_P112966 | NM_009890 | Ch25h     | 12642  | cholesterol 25-hydroxylase                                                                                        | 6.85  | 43.81 | 0.00 |
| A_51_P514085 | NM_013606 | Mx2       | 17858  | myxovirus (influenza virus) resistance 2                                                                          | 8.81  | 43.42 | 0.00 |
| A_51_P463562 | NM_008620 | Gbp4      | 17472  | guanylate binding protein 4                                                                                       | 8.10  | 42.65 | 0.00 |
| A_51_P510156 | NM_008491 | Lcn2      | 16819  | lipocalin 2                                                                                                       | 4.85  | 42.07 | 0.00 |
| A_51_P323180 | NM_172777 | Gbp9      | 236573 | guanylate-binding protein 9                                                                                       | 9.96  | 39.91 | 0.00 |
| A_51_P249989 | NM_145133 | Tifa      | 211550 | TRAF-interacting protein with forkhead-associated<br>domain                                                       | 5.58  | 38.53 | 0.00 |
| A_51_P212491 | NM_133232 | Pfkfb3    | 170768 | 6-phosphofructo-2-kinase/fructose-2,6-biphosphatase 3<br>solute carrier family 10 (sodium/bile acid cotransporter | 7.12  | 37.77 | 0.00 |
| A_51_P173678 | NM_029415 | Slc10a6   | 75750  | family), member 6                                                                                                 | 6.08  | 36.31 | 0.00 |
| A_52_P466090 | NM_018851 | Samhd1    | 56045  | SAM domain and HD domain, 1                                                                                       | 8.24  | 35.24 | 0.00 |

|              |            |           |        |                                                                                              |      |       |      |
|--------------|------------|-----------|--------|----------------------------------------------------------------------------------------------|------|-------|------|
| A_52_P344949 | NM_172777  | Gbp9      | 236573 | guanylate-binding protein 9                                                                  | 8.62 | 35.23 | 0.00 |
| A_52_P141608 | NM_183160  | E030010A1 | 226040 | RIKEN cDNA E030010A14 gene                                                                   | 8.97 | 35.17 | 0.00 |
| A_52_P419678 | NM_001033: | Serpina3f | 238393 | serine (or cysteine) peptidase inhibitor, clade A, member 3F                                 | 5.37 | 34.94 | 0.00 |
| A_52_P525348 | NA         | NA        | NA     | NA                                                                                           | 6.19 | 34.85 | 0.00 |
| A_52_P57843  | NM_011347  | Selp      | 20344  | selectin, platelet                                                                           | 9.38 | 33.03 | 0.00 |
| A_52_P419679 | NM_001033: | Serpina3f | 238393 | serine (or cysteine) peptidase inhibitor, clade A, member 3F                                 | 5.57 | 33.01 | 0.00 |
| A_52_P338066 | NM_023137  | Ubd       | 24108  | ubiquitin D                                                                                  | 4.42 | 32.44 | 0.00 |
| A_51_P342567 | NM_031185  | Akap12    | 83397  | A kinase (PRKA) anchor protein (gravin) 12                                                   | 6.76 | 31.95 | 0.00 |
| A_52_P676403 | NM_019494  | Cxcl11    | 56066  | chemokine (C-X-C motif) ligand 11                                                            | 7.86 | 31.66 | 0.00 |
| A_51_P165244 | NM_018734  | Gbp3      | 55932  | guanylate binding protein 3                                                                  | 6.55 | 31.51 | 0.00 |
| A_51_P510713 | NM_020583  | Isg20     | 57444  | interferon-stimulated protein                                                                | 8.28 | 31.04 | 0.00 |
| A_51_P501858 | NM_148927  | Plekha4   | 69217  | pleckstrin homology domain containing, family A (phosphoinositide binding specific) member 4 | 9.79 | 30.88 | 0.00 |
| A_51_P184936 | NM_021394  | Zbp1      | 58203  | Z-DNA binding protein 1                                                                      | 6.03 | 30.45 | 0.00 |
| A_51_P143893 | NM_054098  | Steap4    | 117167 | STEAP family member 4                                                                        | 5.97 | 30.41 | 0.00 |
| A_51_P202911 | NM_144882  | Spats2l   | 67198  | spermatogenesis associated, serine-rich 2-like                                               | 3.72 | 30.35 | 0.00 |
| A_52_P463936 | NM_015783  | Isg15     | 1E+08  | ISG15 ubiquitin-like modifier                                                                | 6.30 | 30.17 | 0.00 |
| A_52_P544421 | NM_029509  | Gbp8      | 76074  | guanylate-binding protein 8                                                                  | 8.97 | 30.07 | 0.00 |
| A_51_P327405 | NM_029509  | Gbp8      | 76074  | guanylate-binding protein 8                                                                  | 8.00 | 28.83 | 0.00 |
| A_51_P211854 | NM_011347  | Selp      | 20344  | selectin, platelet                                                                           | 9.60 | 28.15 | 0.00 |
| A_52_P350512 | NM_145996  | Arid5a    | 214855 | AT rich interactive domain 5A (MRF1-like)                                                    | 9.21 | 28.01 | 0.00 |
| A_52_P182919 | NM_054098  | Steap4    | 117167 | STEAP family member 4                                                                        | 5.11 | 27.18 | 0.00 |
| A_51_P129229 | NM_008330  | Ifi47     | 15953  | interferon gamma inducible protein 47                                                        | 8.12 | 27.17 | 0.00 |
| A_51_P183571 | NM_008871  | Serpine1  | 18787  | serine (or cysteine) peptidase inhibitor, clade E, member 1                                  | 4.76 | 27.13 | 0.00 |
| A_51_P504991 | NM_181542  | Slfn10    | 237887 | schlafen 10                                                                                  | 4.51 | 27.13 | 0.00 |
| A_52_P452689 | NM_007498  | Atf3      | 11910  | activating transcription factor 3                                                            | 7.14 | 27.03 | 0.00 |
| A_52_P661713 | NM_029000  | Gvin1     | 74558  | GTPase, very large interferon inducible 1                                                    | 6.59 | 26.98 | 0.00 |
| A_51_P463846 | NM_145545  | Gbp6      | 229900 | guanylate binding protein 6                                                                  | 9.68 | 26.76 | 0.00 |
| A_52_P435154 | NM_172648  | Ifi205    | 226695 | interferon activated gene 205                                                                | 6.68 | 26.49 | 0.00 |
| A_52_P199633 | NM_199146  | AI451617  | 209387 | expressed sequence AI451617                                                                  | 6.63 | 26.34 | 0.00 |
| A_51_P212782 | NM_008361  | Il1b      | 16176  | interleukin 1 beta                                                                           | 8.03 | 26.04 | 0.00 |

|               |           |          |        |                                                                                    |       |       |      |
|---------------|-----------|----------|--------|------------------------------------------------------------------------------------|-------|-------|------|
| A_52_P251690  | NM_029000 | Gvin1    | 74558  | GTPase, very large interferon inducible 1                                          | 6.71  | 26.00 | 0.00 |
| A_51_P514961  | NM_178892 | Tiparp   | 99929  | TCDD-inducible poly(ADP-ribose) polymerase                                         | 7.84  | 25.70 | 0.00 |
| A_52_P1197913 | NM_008655 | Gadd45b  | 17873  | growth arrest and DNA-damage-inducible 45 beta                                     | 9.26  | 25.65 | 0.00 |
| A_51_P154983  | NM_022409 | Zfp296   | 63872  | zinc finger protein 296                                                            | 8.43  | 24.30 | 0.00 |
| A_52_P68893   | NM_008337 | lfng     | 15978  | interferon gamma                                                                   | 4.65  | 23.65 | 0.00 |
| A_51_P214423  | BC049153  | Tead1    | 21676  | TEA domain family member 1                                                         | 5.06  | 23.18 | 0.00 |
| A_51_P228753  | XM_897631 | NA       | NA     | NA                                                                                 | 6.93  | 22.78 | 0.00 |
| A_52_P85174   | NM_126166 | Tlr3     | 142980 | toll-like receptor 3                                                               | 7.36  | 22.77 | 0.00 |
| A_52_P448253  | NM_020583 | Isg20    | 57444  | interferon-stimulated protein                                                      | 7.96  | 22.72 | 0.00 |
| A_52_P442567  | NM_009099 | Trim30   | 20128  | tripartite motif-containing 30                                                     | 6.79  | 22.53 | 0.00 |
| A_51_P198179  | NM_023141 | Tor3a    | 30935  | torsin family 3, member A                                                          | 9.01  | 22.49 | 0.00 |
| A_51_P172853  | NM_009841 | Cd14     | 12475  | CD14 antigen                                                                       | 4.57  | 22.40 | 0.00 |
| A_51_P387591  | NM_030612 | Nfkbiz   | 80859  | nuclear factor of kappa light polypeptide gene enhancer in B-cells inhibitor, zeta | 6.09  | 22.39 | 0.00 |
| A_51_P474459  | NM_007707 | Socs3    | 12702  | suppressor of cytokine signaling 3                                                 | 5.64  | 22.27 | 0.00 |
| A_51_P183812  | NM_011410 | Slfn4    | 20558  | schlafen 4                                                                         | 5.81  | 22.11 | 0.00 |
| A_51_P500984  | NM_008655 | Gadd45b  | 17873  | growth arrest and DNA-damage-inducible 45 beta                                     | 6.88  | 21.95 | 0.00 |
| A_52_P6328    | NM_021524 | Nampt    | 59027  | nicotinamide phosphoribosyltransferase                                             | 6.31  | 21.90 | 0.00 |
| A_51_P271503  | NM_008362 | Il1r1    | 16177  | interleukin 1 receptor, type I                                                     | 6.86  | 21.87 | 0.00 |
| A_51_P494241  | NM_007534 | Bcl2a1b  | 12045  | B-cell leukemia/lymphoma 2 related protein A1b                                     | 7.27  | 21.58 | 0.00 |
| A_51_P262515  | NM_172603 | Phf11    | 219131 | PHD finger protein 11                                                              | 6.58  | 21.34 | 0.00 |
| A_51_P400166  | NM_011637 | Trex1    | 22040  | three prime repair exonuclease 1                                                   | 9.76  | 21.25 | 0.00 |
| A_52_P371494  | AK136456  | AI451617 | 209387 | expressed sequence AI451617                                                        | 5.52  | 21.17 | 0.00 |
| A_52_P1173559 | NA        | NA       | NA     | NA                                                                                 | 8.34  | 21.12 | 0.00 |
| A_51_P509518  | NM_009058 | Ralgds   | 19730  | ral guanine nucleotide dissociation stimulator                                     | 6.33  | 20.40 | 0.00 |
| A_52_P164821  | XM_905096 | Gm12250  | 631323 | predicted gene 12250                                                               | 6.38  | 20.16 | 0.00 |
| A_51_P325904  | NM_008381 | Inhbb    | 16324  | inhibin beta-B                                                                     | 7.04  | 20.04 | 0.00 |
| A_51_P387123  | NM_011854 | Oasl2    | 23962  | 2'-5' oligoadenylate synthetase-like 2                                             | 6.45  | 19.81 | 0.00 |
| A_51_P262171  | NM_008326 | Irgm1    | 15944  | immunity-related GTPase family M member 1                                          | 7.86  | 19.74 | 0.00 |
| A_52_P550858  | AK085407  | Ifi44    | 99899  | interferon-induced protein 44                                                      | 10.43 | 18.98 | 0.00 |
| A_51_P295315  | NM_020033 | Ankrd2   | 56642  | ankyrin repeat domain 2 (stretch responsive muscle)                                | 4.18  | 18.92 | 0.00 |

|              |           |           |        |                                                              |      |       |      |
|--------------|-----------|-----------|--------|--------------------------------------------------------------|------|-------|------|
| A_51_P478722 | NM_011579 | Tgtp      | 21822  | T-cell specific GTPase                                       | 7.38 | 18.73 | 0.00 |
| A_51_P254656 | NM_008230 | Hdc       | 15186  | histidine decarboxylase                                      | 7.04 | 18.72 | 0.00 |
| A_51_P363187 | NM_008176 | Cxcl1     | 14825  | chemokine (C-X-C motif) ligand 1                             | 4.38 | 18.46 | 0.00 |
| A_51_P294979 | NM_013602 | Mt1       | 17748  | metallothionein 1                                            | 3.97 | 18.44 | 0.00 |
| A_52_P64514  | AK007221  | Herc5     | 67138  | hect domain and RLD 5                                        | 6.80 | 18.28 | 0.00 |
| A_52_P416756 | NM_033075 | D17H6S56E | 110956 | DNA segment, Chr 17, human D6S56E 5                          | 5.61 | 18.12 | 0.00 |
| A_52_P423810 | AK154954  | Mt1       | 17748  | metallothionein 1                                            | 4.31 | 18.07 | 0.00 |
| A_51_P165182 | NM_028967 | Batf2     | 74481  | basic leucine zipper transcription factor, ATF-like 2        | 5.71 | 17.85 | 0.00 |
| A_51_P501248 | NM_025367 | Sphk1     | 20698  | sphingosine kinase 1                                         | 5.26 | 17.56 | 0.00 |
| A_52_P386627 | NM_028679 | Irak3     | 73914  | interleukin-1 receptor-associated kinase 3                   | 6.89 | 17.55 | 0.00 |
| A_52_P49797  | NA        | NA        | NA     | NA                                                           | 5.74 | 17.55 | 0.00 |
| A_51_P501554 | NM_025453 | Tm4sf20   | 66261  | transmembrane 4 L six family member 20                       | 6.58 | 17.41 | 0.00 |
| A_51_P326191 | NM_009251 | Serpina3g | 20715  | serine (or cysteine) peptidase inhibitor, clade A, member 3G | 7.24 | 17.32 | 0.00 |
| A_52_P52357  | BC052851  | Tor3a     | 30935  | torsin family 3, member A                                    | 7.94 | 17.14 | 0.00 |
| A_51_P387235 | NM_021524 | Nampt     | 59027  | nicotinamide phosphoribosyltransferase                       | 5.84 | 16.93 | 0.00 |
| A_51_P220976 | NM_008337 | lfng      | 15978  | interferon gamma                                             | 3.95 | 16.93 | 0.00 |
| A_51_P234274 | BC013672  | Ddx60     | 234311 | DEAD (Asp-Glu-Ala-Asp) box polypeptide 60                    | 6.78 | 16.90 | 0.00 |
| A_52_P295432 | NM_009141 | Cxcl5     | 20311  | chemokine (C-X-C motif) ligand 5                             | 6.08 | 16.68 | 0.00 |
| A_51_P134468 | NM_033075 | D17H6S56E | 110956 | DNA segment, Chr 17, human D6S56E 5                          | 5.26 | 16.63 | 0.00 |
| A_51_P217463 | NM_009140 | Cxcl2     | 20310  | chemokine (C-X-C motif) ligand 2                             | 4.78 | 16.57 | 0.00 |
| A_51_P402943 | NM_009114 | S100a9    | 20202  | S100 calcium binding protein A9 (calgranulin B)              | 4.89 | 16.39 | 0.00 |
| A_52_P679860 | AK147960  | Herc5     | 67138  | hect domain and RLD 5                                        | 6.81 | 16.22 | 0.00 |
| A_52_P126158 | NM_008326 | Irgm1     | 15944  | immunity-related GTPase family M member 1                    | 6.36 | 15.99 | 0.00 |
| A_52_P474528 | NA        | NA        | NA     | NA                                                           | 5.47 | 15.90 | 0.00 |
| A_52_P431615 | XM_001000 | Gm1966    | 434223 | predicted gene 1966                                          | 6.24 | 15.88 | 0.00 |
| A_51_P286488 | NM_133662 | Ier3      | 15937  | immediate early response 3                                   | 5.62 | 15.80 | 0.00 |
| A_52_P646832 | NM_023380 | Samsn1    | 67742  | SAM domain, SH3 domain and nuclear localization signals, 1   | 6.47 | 15.77 | 0.00 |
| A_51_P365744 | NM_025777 | Duoxa2    | 66811  | dual oxidase maturation factor 2                             | 6.14 | 15.70 | 0.00 |
| A_51_P176972 | NM_178114 | Amigo2    | 105827 | adhesion molecule with Ig like domain 2                      | 5.35 | 15.66 | 0.00 |
| A_51_P462192 | NM_138648 | Olr1      | 108078 | oxidized low density lipoprotein (lectin-like) receptor 1    | 8.11 | 15.60 | 0.00 |

|              |           |           |        |                                                           |      |       |      |
|--------------|-----------|-----------|--------|-----------------------------------------------------------|------|-------|------|
| A_51_P364694 | AK138790  | Sfn5      | 327978 | schlafen 5                                                | 6.55 | 15.60 | 0.00 |
| A_51_P275454 | NM_009099 | Trim30    | 20128  | tripartite motif-containing 30                            | 5.91 | 15.53 | 0.00 |
| A_52_P681310 | NM_011113 | Plaur     | 18793  | plasminogen activator, urokinase receptor                 | 5.39 | 15.41 | 0.00 |
| A_51_P153765 | NM_024495 | Car13     | 71934  | carbonic anhydrase 13                                     | 7.65 | 15.40 | 0.00 |
| A_51_P291906 | NM_126166 | Tlr3      | 142980 | toll-like receptor 3                                      | 6.83 | 15.30 | 0.00 |
| A_51_P288138 | NM_008039 | Fpr2      | 14289  | formyl peptide receptor 2                                 | 7.39 | 15.11 | 0.00 |
| A_52_P83479  | NM_008329 | Ifi204    | 15951  | interferon activated gene 204                             | 5.31 | 15.02 | 0.00 |
| A_51_P348280 | NM_008359 | Il17ra    | 16172  | interleukin 17 receptor A                                 | 8.33 | 14.96 | 0.00 |
| A_51_P229676 | NM_011636 | Plscr1    | 22038  | phospholipid scramblase 1                                 | 6.71 | 14.95 | 0.00 |
| A_51_P511787 | NM_007609 | Casp4     | 12363  | caspase 4, apoptosis-related cysteine peptidase           | 6.43 | 14.92 | 0.00 |
| A_51_P229675 | NM_011636 | Plscr1    | 22038  | phospholipid scramblase 1                                 | 6.85 | 14.72 | 0.00 |
| A_51_P377620 | NM_001033 | Mnda      | 381308 | myeloid cell nuclear differentiation antigen              | 6.10 | 14.51 | 0.00 |
| A_51_P246317 | NM_008630 | Mt2       | 17750  | metallothionein 2                                         | 3.74 | 14.50 | 0.00 |
| A_51_P484158 | NM_027399 | Steap1    | 70358  | six transmembrane epithelial antigen of the prostate 1    | 5.72 | 14.47 | 0.00 |
| A_52_P208763 | NM_013654 | Ccl7      | 20306  | chemokine (C-C motif) ligand 7                            | 5.69 | 14.46 | 0.00 |
| A_51_P517843 | NM_027450 | Glipr2    | 384009 | GLI pathogenesis-related 2                                | 7.63 | 14.39 | 0.00 |
| A_51_P100063 | NM_010727 | Ln timer  | 16924  | ligand of numb-protein X 1                                | 3.25 | 14.29 | 0.00 |
| A_51_P197910 | XM_898199 | NA        | NA     | NA                                                        | 6.52 | 14.24 | 0.00 |
| A_52_P409601 | NM_170701 | Cd40      | 21939  | CD40 antigen                                              | 6.95 | 14.20 | 0.00 |
| A_51_P440535 | NM_029005 | Mlkl      | 74568  | mixed lineage kinase domain-like                          | 6.93 | 14.08 | 0.00 |
| A_52_P535484 | NM_029000 | Gvin1     | 74558  | GTPase, very large interferon inducible 1                 | 6.61 | 14.05 | 0.00 |
| A_52_P31577  | NM_008359 | Il17ra    | 16172  | interleukin 17 receptor A                                 | 8.43 | 14.05 | 0.00 |
| A_51_P256827 | NM_013650 | S100a8    | 20201  | S100 calcium binding protein A8 (calgranulin A)           | 5.37 | 13.91 | 0.00 |
| A_52_P615051 | AK035396  | 1200016E2 | 319202 | RIKEN cDNA 1200016E24 gene                                | 5.49 | 13.82 | 0.00 |
| A_51_P317176 | NM_009971 | Csf3      | 12985  | colony stimulating factor 3 (granulocyte)                 | 5.10 | 13.80 | 0.00 |
| A_51_P313803 | NM_028287 | Zufsp     | 72580  | zinc finger with UFM1-specific peptidase domain           | 6.56 | 13.59 | 0.00 |
| A_51_P494403 | AK046736  | Xaf1      | 327959 | XIAP associated factor 1                                  | 4.47 | 13.58 | 0.00 |
| A_51_P267587 | BC052902  | Gdap10    | 14546  | ganglioside-induced differentiation-associated-protein 10 | 6.29 | 13.50 | 0.00 |
| A_51_P490795 | AK137548  | Mxd1      | 17119  | MAX dimerization protein 1                                | 7.67 | 13.39 | 0.00 |
| A_51_P177392 | AB041546  | Tacc2     | 57752  | transforming, acidic coiled-coil containing protein 2     | 7.10 | 13.35 | 0.00 |
| A_52_P425839 | NM_181596 | Retnlg    | 245195 | resistin like gamma                                       | 8.33 | 13.29 | 0.00 |

|              |           |           |        |                                                       |      |       |      |
|--------------|-----------|-----------|--------|-------------------------------------------------------|------|-------|------|
| A_52_P455370 | NM_175628 | A2m       | 232345 | alpha-2-macroglobulin                                 | 2.30 | 13.29 | 0.01 |
| A_52_P535122 | NA        | NA        | NA     | NA                                                    | 7.85 | 13.28 | 0.00 |
| A_52_P110052 | NM_010045 | Darc      | 13349  | Duffy blood group, chemokine receptor                 | 5.83 | 13.22 | 0.00 |
| A_52_P267391 | NM_023835 | Trim12    | 76681  | tripartite motif-containing 12                        | 3.06 | 13.16 | 0.00 |
| A_51_P307166 | NM_001039 | Il1rn     | 16181  | interleukin 1 receptor antagonist                     | 6.10 | 13.10 | 0.00 |
| A_52_P799815 | NM_001025 | Tmem171   | 380863 | transmembrane protein 171                             | 6.81 | 13.06 | 0.00 |
| A_51_P111164 | NM_172612 | Rnd1      | 223881 | Rho family GTPase 1                                   | 6.85 | 13.05 | 0.00 |
| A_51_P408346 | NM_008329 | Ifi204    | 15951  | interferon activated gene 204                         | 7.27 | 13.01 | 0.00 |
| A_52_P86965  | XM_980696 | AI607873  | 226691 | expressed sequence AI607873                           | 5.81 | 12.97 | 0.00 |
| A_51_P514712 | NM_001039 | Parp14    | 547253 | poly (ADP-ribose) polymerase family, member 14        | 8.30 | 12.79 | 0.00 |
| A_51_P444447 | NM_007679 | Cebpd     | 12609  | CCAAT/enhancer binding protein (C/EBP), delta         | 5.53 | 12.78 | 0.00 |
| A_51_P144438 | AK157301  | Znfx1     | 98999  | zinc finger, NFX1-type containing 1                   | 7.58 | 12.52 | 0.00 |
| A_51_P487690 | NM_133871 | Ifi44     | 99899  | interferon-induced protein 44                         | 6.06 | 12.45 | 0.00 |
| A_51_P384894 | NM_001033 | Csta      | 209294 | cystatin A                                            | 5.58 | 12.35 | 0.00 |
| A_51_P126437 | NM_007930 | Enc1      | 13803  | ectodermal-neural cortex 1                            | 4.38 | 12.30 | 0.00 |
| A_51_P159503 | NM_001040 | Rnf213    | 672511 | ring finger protein 213                               | 8.06 | 12.27 | 0.00 |
| A_52_P654841 | NM_011636 | Plscr1    | 22038  | phospholipid scramblase 1                             | 6.17 | 12.26 | 0.00 |
| A_52_P362917 | NM_133232 | Pfkfb3    | 170768 | 6-phosphofructo-2-kinase/fructose-2,6-biphosphatase 3 | 6.10 | 12.24 | 0.00 |
| A_51_P116601 | NM_172447 | A330021E2 | 207686 | RIKEN cDNA A330021E22 gene                            | 5.26 | 12.23 | 0.00 |
| A_52_P408580 | NM_001004 | Tacc2     | 57752  | transforming, acidic coiled-coil containing protein 2 | 7.30 | 12.21 | 0.00 |
| A_52_P380369 | NM_199015 | D14Ertd66 | 219132 | DNA segment, Chr 14, ERATO Doi 668, expressed         | 5.95 | 12.18 | 0.00 |
| A_51_P464918 | NM_019453 | Mefv      | 54483  | Mediterranean fever                                   | 6.13 | 12.09 | 0.00 |
| A_52_P634829 | NM_023835 | Trim12    | 76681  | tripartite motif-containing 12                        | 4.15 | 11.99 | 0.00 |
| A_51_P120093 | NM_028035 | Snx10     | 71982  | sorting nexin 10                                      | 6.28 | 11.96 | 0.00 |
| A_52_P199019 | NM_001013 | Trim6     | 94088  | tripartite motif-containing 6                         | 6.47 | 11.91 | 0.00 |
| A_51_P454422 | AB093296  | Unc79     | 217843 | unc-79 homolog (C. elegans)                           | 4.51 | 11.86 | 0.00 |
| A_51_P408506 | BC008626  | Icam1     | 15894  | intercellular adhesion molecule 1                     | 5.82 | 11.85 | 0.00 |
| A_51_P315904 | NM_011817 | Gadd45g   | 23882  | growth arrest and DNA-damage-inducible 45 gamma       | 3.86 | 11.80 | 0.00 |
| A_52_P326187 | XM_136331 | Gm4955    | 240921 | predicted gene 4955                                   | 4.56 | 11.74 | 0.00 |

|              |           |           |        |                                                                     |      |       |      |
|--------------|-----------|-----------|--------|---------------------------------------------------------------------|------|-------|------|
| A_51_P175580 | NM_021897 | Trp53inp1 | 60599  | transformation related protein 53 inducible nuclear protein 1       | 5.14 | 11.69 | 0.00 |
| A_51_P342916 | NM_020283 | B3galt1   | 26877  | UDP-Gal:betaGlcNAc beta 1,3-galactosyltransferase, polypeptide 1    | 6.09 | 11.54 | 0.00 |
| A_51_P362066 | NM_007695 | Chi3l1    | 12654  | chitinase 3-like 1                                                  | 5.35 | 11.45 | 0.00 |
| A_51_P458258 | NM_011888 | Ccl19     | 24047  | chemokine (C-C motif) ligand 19                                     | 5.28 | 11.41 | 0.00 |
| A_51_P341767 | NM_001039 | Parp14    | 547253 | poly (ADP-ribose) polymerase family, member 14                      | 7.25 | 11.39 | 0.00 |
| A_51_P470079 | NM_010555 | Il1r2     | 16178  | interleukin 1 receptor, type II                                     | 6.63 | 11.36 | 0.00 |
| A_51_P268831 | NM_172659 | Slc2a6    | 227659 | solute carrier family 2 (facilitated glucose transporter), member 6 | 5.77 | 11.30 | 0.00 |
| A_52_P516034 | NM_011200 | Ptp4a1    | 19243  | protein tyrosine phosphatase 4a1                                    | 6.01 | 11.30 | 0.00 |
| A_51_P107362 | NM_007706 | Socs2     | 216233 | suppressor of cytokine signaling 2                                  | 5.09 | 11.21 | 0.00 |
| A_52_P363216 | NM_133219 | Gcnt2     | 14538  | glucosaminyl (N-acetyl) transferase 2, I-branching enzyme           | 7.00 | 11.16 | 0.00 |
| A_51_P401343 | NM_019500 | Cldn14    | 56173  | claudin 14                                                          | 7.16 | 11.16 | 0.00 |
| A_51_P257550 | NM_010807 | Marcksl1  | 17357  | MARCKS-like 1                                                       | 4.75 | 11.16 | 0.00 |
| A_51_P333274 | NM_013542 | Gzmb      | 14939  | granzyme B                                                          | 4.83 | 11.11 | 0.00 |
| A_51_P423578 | NM_011408 | Sln2      | 20556  | schlafen 2                                                          | 6.62 | 11.04 | 0.00 |
| A_51_P296608 | NM_007836 | Gadd45a   | 13197  | growth arrest and DNA-damage-inducible 45 alpha                     | 4.86 | 10.99 | 0.00 |
| A_51_P408343 | NM_008329 | Ifi204    | 15951  | interferon activated gene 204                                       | 6.81 | 10.97 | 0.00 |
| A_52_P138126 | NM_133232 | Pfkfb3    | 170768 | 6-phosphofructo-2-kinase/fructose-2,6-biphosphatase 3               | 6.82 | 10.91 | 0.00 |
| A_52_P503387 | NM_021897 | Trp53inp1 | 60599  | transformation related protein 53 inducible nuclear protein 1       | 4.94 | 10.81 | 0.00 |
| A_52_P640484 | NM_009277 | Trim21    | 20821  | tripartite motif-containing 21                                      | 7.59 | 10.76 | 0.00 |
| A_51_P311611 | NM_010045 | Darc      | 13349  | Duffy blood group, chemokine receptor                               | 5.14 | 10.70 | 0.00 |
| A_51_P304170 | NM_023386 | Rtp4      | 67775  | receptor transporter protein 4                                      | 6.46 | 10.64 | 0.00 |
| A_51_P297925 | NM_153159 | Zc3h12a   | 230738 | zinc finger CCCH type containing 12A                                | 5.87 | 10.62 | 0.00 |
| A_51_P417701 | NM_001042 | Apaf1     | 11783  | apoptotic peptidase activating factor 1                             | 5.31 | 10.61 | 0.00 |
| A_52_P559919 | NM_011163 | Eif2ak2   | 19106  | eukaryotic translation initiation factor 2-alpha kinase 2           | 5.49 | 10.59 | 0.00 |
| A_52_P613241 | NM_010493 | Icam1     | 15894  | intercellular adhesion molecule 1                                   | 6.35 | 10.58 | 0.00 |



|              |           |          |        |                                                          |      |       |      |
|--------------|-----------|----------|--------|----------------------------------------------------------|------|-------|------|
| A_51_P385099 | NM_013693 | Tnf      | 21926  | tumor necrosis factor                                    | 4.14 | 10.58 | 0.00 |
| A_52_P604629 | NM_153287 | Csrnp1   | 215418 | cysteine-serine-rich nuclear protein 1                   | 5.85 | 10.58 | 0.00 |
| A_51_P337308 | NM_011315 | Saa3     | 20210  | serum amyloid A 3                                        | 3.53 | 10.49 | 0.00 |
| A_51_P115575 | D13759    | Map3k8   | 26410  | mitogen-activated protein kinase kinase kinase 8         | 6.88 | 10.49 | 0.00 |
| A_51_P231103 | NM_007843 | Defb1    | 13214  | defensin beta 1                                          | 4.23 | 10.44 | 0.00 |
| A_51_P334785 | NM_175026 | Pyhin1   | 236312 | pyrin and HIN domain family, member 1                    | 4.90 | 10.32 | 0.00 |
| A_52_P321140 | NM_007843 | Defb1    | 13214  | defensin beta 1                                          | 4.51 | 10.18 | 0.00 |
| A_51_P488196 | NM_028472 | Bmper    | 73230  | BMP-binding endothelial regulator                        | 5.78 | 10.11 | 0.00 |
| A_51_P144264 | NM_008452 | Klf2     | 16598  | Kruppel-like factor 2 (lung)                             | 4.00 | 10.11 | 0.00 |
| A_51_P155873 | XM_127272 | Ppp1r3g  | 76487  | protein phosphatase 1, regulatory (inhibitor) subunit 3G | 3.10 | 10.01 | 0.00 |
| A_51_P319460 | NM_011019 | Osmr     | 18414  | oncostatin M receptor                                    | 7.28 | 9.95  | 0.00 |
| A_51_P412835 | NM_007829 | Daxx     | 13163  | Fas death domain-associated protein                      | 6.92 | 9.91  | 0.00 |
| A_51_P149714 | NM_026835 | Ms4a6d   | 68774  | membrane-spanning 4-domains, subfamily A, member 6D      | 5.31 | 9.89  | 0.00 |
| A_51_P238354 | NM_019549 | Plek     | 56193  | pleckstrin                                               | 5.90 | 9.88  | 0.00 |
| A_52_P666646 | NM_178682 | 4933426M | 217684 | RIKEN cDNA 4933426M11 gene                               | 7.28 | 9.84  | 0.00 |
| A_51_P166941 | NM_028679 | Irak3    | 73914  | interleukin-1 receptor-associated kinase 3               | 6.28 | 9.84  | 0.00 |
| A_51_P462299 | NM_181732 | Aida     | 108909 | axin interactor, dorsalization associated                | 6.89 | 9.78  | 0.00 |
| A_52_P297062 | NM_010727 | Ln timer | 16924  | ligand of numb-protein X 1                               | 2.76 | 9.75  | 0.00 |
| A_51_P401907 | AK089257  | Gm5483   | 433016 | predicted gene 5483                                      | 5.06 | 9.74  | 0.00 |
| A_51_P265571 | NM_009627 | Adm      | 11535  | adrenomedullin                                           | 6.72 | 9.70  | 0.00 |
| A_52_P193657 | NM_175026 | Pyhin1   | 236312 | pyrin and HIN domain family, member 1                    | 4.47 | 9.68  | 0.00 |
| A_52_P176391 | NM_008301 | Hspa2    | 15512  | heat shock protein 2                                     | 4.78 | 9.67  | 0.00 |
| A_52_P183181 | NM_001038 | Adar     | 56417  | adenosine deaminase, RNA-specific                        | 6.31 | 9.67  | 0.00 |
| A_52_P553786 | NA        | NA       | NA     | NA                                                       | 4.82 | 9.64  | 0.00 |
| A_51_P421876 | NM_016850 | Irf7     | 54123  | interferon regulatory factor 7                           | 5.69 | 9.62  | 0.00 |
| A_51_P427383 | BC031151  | Samd9l   | 209086 | sterile alpha motif domain containing 9-like             | 4.87 | 9.62  | 0.00 |
| A_51_P447545 | NM_008341 | Igfbp1   | 16006  | insulin-like growth factor binding protein 1             | 3.97 | 9.52  | 0.00 |
| A_51_P354126 | NM_011260 | Reg3g    | 19695  | regenerating islet-derived 3 gamma                       | 4.09 | 9.50  | 0.00 |
| A_52_P84037  | AK033206  | Socs2    | 216233 | suppressor of cytokine signaling 2                       | 7.76 | 9.48  | 0.00 |
| A_52_P306305 | NM_001035 | Akap2    | 11641  | A kinase (PRKA) anchor protein 2                         | 5.80 | 9.39  | 0.00 |
| A_52_P678833 | AK152160  | Dcp2     | 70640  | DCP2 decapping enzyme homolog ( <i>S. cerevisiae</i> )   | 7.14 | 9.36  | 0.00 |
| A_51_P434301 | NM_026656 | Mcoln2   | 68279  | mucolipin 2                                              | 7.22 | 9.30  | 0.00 |

|              |           |            |        |                                                               |      |      |      |
|--------------|-----------|------------|--------|---------------------------------------------------------------|------|------|------|
| A_51_P325914 | NM_010591 | Jun        | 16476  | Jun oncogene                                                  | 6.04 | 9.28 | 0.00 |
| A_51_P210956 | NM_011693 | Vcam1      | 22329  | vascular cell adhesion molecule 1                             | 6.46 | 9.28 | 0.00 |
| A_52_P97680  | NM_001039 | Parp14     | 547253 | poly (ADP-ribose) polymerase family, member 14                | 6.65 | 9.27 | 0.00 |
| A_52_P363951 | NM_011580 | Thbs1      | 21825  | thrombospondin 1                                              | 4.37 | 9.22 | 0.00 |
| A_52_P635388 | AB026047  | Ms4a6d     | 68774  | membrane-spanning 4-domains, subfamily A, member 6D           | 4.73 | 9.19 | 0.00 |
| A_51_P416295 | NM_019440 | Irgm2      | 54396  | immunity-related GTPase family M member 2                     | 6.61 | 9.14 | 0.00 |
| A_51_P384831 | NM_134164 | Syt12      | 171180 | synaptotagmin XII                                             | 4.07 | 9.05 | 0.00 |
| A_52_P269384 | NM_178065 | 1110018G07 | 68497  | RIKEN cDNA 1110018G07 gene                                    | 6.22 | 9.05 | 0.00 |
| A_51_P228768 | NM_011409 | Slnf3      | 20557  | schlafen 3                                                    | 4.45 | 9.04 | 0.00 |
| A_52_P188827 | NM_181318 | Rasgef1b   | 320292 | RasGEF domain family, member 1B                               | 4.73 | 9.01 | 0.00 |
| A_51_P238357 | NM_019549 | Plek       | 56193  | pleckstrin                                                    | 5.73 | 8.99 | 0.00 |
| A_51_P112405 | NM_011113 | Plaur      | 18793  | plasminogen activator, urokinase receptor                     | 4.87 | 8.96 | 0.00 |
| A_52_P248403 | NA        | NA         | NA     | NA                                                            | 6.03 | 8.96 | 0.00 |
| A_51_P454873 | NM_023456 | Npy        | 109648 | neuropeptide Y                                                | 6.98 | 8.94 | 0.00 |
| A_52_P601148 | NM_175116 | Lpar6      | 67168  | lysophosphatidic acid receptor 6                              | 6.08 | 8.93 | 0.00 |
| A_51_P473953 | XM_887737 | NA         | NA     | NA                                                            | 5.43 | 8.92 | 0.00 |
| A_51_P475156 | XM_204030 | Rnf19b     | 75234  | ring finger protein 19B                                       | 6.58 | 8.89 | 0.00 |
| A_51_P513062 | NM_175327 | B630019K06 | 102941 | RIKEN cDNA B630019K06 gene                                    | 7.30 | 8.89 | 0.00 |
| A_52_P23308  | NM_027482 | 5730508B09 | 70617  | RIKEN cDNA 5730508B09 gene                                    | 5.74 | 8.87 | 0.00 |
| A_51_P204080 | NM_013820 | Hk2        | 15277  | hexokinase 2                                                  | 5.62 | 8.84 | 0.00 |
| A_51_P160754 | NM_031159 | Apobec1    | 11810  | apolipoprotein B mRNA editing enzyme, catalytic polypeptide 1 | 5.52 | 8.83 | 0.00 |
| A_51_P202633 | NM_015766 | Ebi3       | 50498  | Epstein-Barr virus induced gene 3                             | 5.49 | 8.83 | 0.00 |
| A_52_P80944  | NM_011756 | Zfp36      | 22695  | zinc finger protein 36                                        | 4.38 | 8.82 | 0.00 |
| A_52_P550173 | NM_013730 | Slamf1     | 27218  | signaling lymphocytic activation molecule family member 1     | 4.56 | 8.79 | 0.00 |
| A_51_P159803 | NM_032002 | Nrg4       | 83961  | neuregulin 4                                                  | 5.20 | 8.74 | 0.00 |
| A_52_P556111 | NM_178682 | 4933426M11 | 217684 | RIKEN cDNA 4933426M11 gene                                    | 6.04 | 8.74 | 0.00 |
| A_51_P115005 | NM_010104 | Edn1       | 13614  | endothelin 1                                                  | 5.21 | 8.74 | 0.00 |
| A_51_P428529 | NM_033541 | Oas1c      | 114643 | 2'-5' oligoadenylate synthetase 1C                            | 5.91 | 8.70 | 0.00 |
| A_51_P112355 | NM_018738 | Igtp       | 16145  | interferon gamma induced GTPase                               | 5.27 | 8.69 | 0.00 |
| A_51_P363947 | NM_007669 | Cdkn1a     | 12575  | cyclin-dependent kinase inhibitor 1A (P21)                    | 4.34 | 8.57 | 0.00 |

|               |           |          |        |                                                                                        |      |      |      |
|---------------|-----------|----------|--------|----------------------------------------------------------------------------------------|------|------|------|
| A_51_P177744  | NM_028864 | Zc3hav1  | 78781  | zinc finger CCCH type, antiviral 1                                                     | 6.37 | 8.57 | 0.00 |
| A_52_P323111  | AK136463  | Lass6    | 241447 | LAG1 homolog, ceramide synthase 6                                                      | 4.89 | 8.55 | 0.00 |
| A_52_P217875  | NM_008211 | H3f3b    | 15081  | H3 histone, family 3B                                                                  | 6.22 | 8.53 | 0.00 |
| A_51_P490456  | NM_178373 | Cidec    | 14311  | cell death-inducing DFFA-like effector c                                               | 3.89 | 8.51 | 0.00 |
| A_51_P345393  | NM_007987 | Fas      | 14102  | Fas (TNF receptor superfamily member 6)                                                | 6.97 | 8.50 | 0.00 |
| A_52_P599964  | XM_136331 | Gm4955   | 240921 | predicted gene 4955                                                                    | 4.13 | 8.50 | 0.00 |
| A_51_P154842  | NM_145153 | Oas1f    | 243262 | 2'-5' oligoadenylate synthetase 1F                                                     | 4.13 | 8.49 | 0.00 |
| A_52_P429609  | NM_144539 | Slamf7   | 75345  | SLAM family member 7                                                                   | 3.80 | 8.48 | 0.00 |
| A_51_P263246  | NM_008748 | Dusp8    | 18218  | dual specificity phosphatase 8                                                         | 5.08 | 8.39 | 0.00 |
| A_51_P127681  | NM_013885 | Clic4    | 29876  | chloride intracellular channel 4 (mitochondrial)                                       | 5.30 | 8.38 | 0.00 |
| A_52_P542540  | AK041599  | Stat1    | 20846  | signal transducer and activator of transcription 1                                     | 6.65 | 8.37 | 0.00 |
| A_51_P513568  | AK017897  | Stx11    | 74732  | syntaxin 11                                                                            | 6.04 | 8.30 | 0.00 |
| A_52_P98625   | XM_884335 | Ankrd57  | 268301 | ankyrin repeat domain 57                                                               | 6.08 | 8.30 | 0.00 |
| A_52_P121468  | NM_027835 | Ifih1    | 71586  | interferon induced with helicase C domain 1                                            | 5.04 | 8.27 | 0.00 |
| A_52_P89567   | NM_007483 | Rhob     | 11852  | ras homolog gene family, member B                                                      | 4.94 | 8.21 | 0.00 |
| A_51_P362531  | NM_144835 | Heatr1   | 217995 | HEAT repeat containing 1<br>avian reticuloendotheliosis viral (v-rel) oncogene related | 6.53 | 8.20 | 0.00 |
| A_51_P389751  | NM_009046 | Relb     | 19698  | B                                                                                      | 6.23 | 8.15 | 0.00 |
| A_51_P306017  | NM_007865 | Dll1     | 13388  | delta-like 1 (Drosophila)                                                              | 6.24 | 8.12 | 0.00 |
| A_52_P297332  | NM_145626 | NA       | NA     | NA                                                                                     | 5.16 | 8.09 | 0.00 |
| A_52_P282762  | NM_010851 | Myd88    | 17874  | myeloid differentiation primary response gene 88                                       | 5.97 | 8.09 | 0.00 |
| A_51_P202745  | NM_026083 | Zc3h13   | 67302  | zinc finger CCCH type containing 13                                                    | 5.37 | 8.08 | 0.00 |
| A_51_P480290  | AK010559  | Casz1    | 69743  | castor homolog 1, zinc finger (Drosophila)                                             | 4.91 | 8.08 | 0.00 |
| A_52_P400436  | NM_025367 | Sphk1    | 20698  | sphingosine kinase 1                                                                   | 5.15 | 8.07 | 0.00 |
| A_52_P398554  | NA        | NA       | NA     | NA                                                                                     | 5.30 | 8.07 | 0.00 |
| A_52_P179785  | NM_138952 | Ripk2    | 192656 | receptor (TNFRSF)-interacting serine-threonine kinase 2                                | 5.26 | 8.03 | 0.00 |
| A_52_P675857  | NA        | NA       | NA     | NA                                                                                     | 2.32 | 8.02 | 0.01 |
| A_52_P577484  | NM_011448 | Sox9     | 20682  | SRY-box containing gene 9                                                              | 4.31 | 8.02 | 0.00 |
| A_52_P1020860 | AK153119  | AW112010 | 107350 | expressed sequence AW112010                                                            | 6.61 | 8.01 | 0.00 |
| A_51_P458262  | NM_011888 | Ccl19    | 24047  | chemokine (C-C motif) ligand 19                                                        | 5.31 | 7.98 | 0.00 |
| A_51_P427563  | NM_025815 | Cpne8    | 66871  | copine VIII                                                                            | 4.25 | 7.98 | 0.00 |
| A_51_P375201  | NM_013807 | Plk3     | 12795  | polo-like kinase 3 (Drosophila)                                                        | 4.23 | 7.97 | 0.00 |

|               |           |          |        |                                                                                               |      |      |      |
|---------------|-----------|----------|--------|-----------------------------------------------------------------------------------------------|------|------|------|
| A_52_P310040  | AK220437  | BC016423 | 105203 | cDNA sequence BC016423                                                                        | 5.28 | 7.94 | 0.00 |
| A_52_P184257  | NM_027399 | Steap1   | 70358  | six transmembrane epithelial antigen of the prostate 1                                        | 5.76 | 7.93 | 0.00 |
| A_51_P253074  | NM_027979 | Chit1    | 71884  | chitinase 1 (chitotriosidase)                                                                 | 6.46 | 7.93 | 0.00 |
| A_52_P249965  | NM_011723 | Xdh      | 22436  | xanthine dehydrogenase                                                                        | 5.98 | 7.91 | 0.00 |
| A_51_P155643  | NM_016740 | S100a11  | 20195  | S100 calcium binding protein A11 (calgizzarin)                                                | 5.05 | 7.88 | 0.00 |
| A_51_P413359  | NM_183201 | Slfn5    | 327978 | schlafen 5                                                                                    | 5.05 | 7.87 | 0.00 |
| A_51_P389885  | NM_011461 | Spic     | 20728  | Spi-C transcription factor (Spi-1/PU.1 related)                                               | 4.24 | 7.86 | 0.00 |
| A_51_P102096  | NM_010849 | Myc      | 17869  | myelocytomatosis oncogene                                                                     | 4.84 | 7.86 | 0.00 |
| A_51_P388607  | NM_010751 | Mxd1     | 17119  | MAX dimerization protein 1                                                                    | 6.95 | 7.85 | 0.00 |
| A_52_P361323  | NM_011461 | Spic     | 20728  | Spi-C transcription factor (Spi-1/PU.1 related)                                               | 4.31 | 7.81 | 0.00 |
| A_52_P1093529 | NM_177320 | Pik3r5   | 320207 | phosphoinositide-3-kinase, regulatory subunit 5, p101                                         | 6.06 | 7.78 | 0.00 |
| A_51_P422257  | NM_010131 | Emx1     | 13796  | empty spiracles homolog 1 (Drosophila)                                                        | 3.60 | 7.78 | 0.00 |
| A_52_P223809  | NM_030150 | Dhx58    | 80861  | DEXH (Asp-Glu-X-His) box polypeptide 58                                                       | 5.16 | 7.74 | 0.00 |
| A_52_P563825  | NM_020283 | B3galt1  | 26877  | UDP-Gal:betaGlcNAc beta 1,3-galactosyltransferase, polypeptide 1                              | 5.33 | 7.69 | 0.00 |
| A_52_P337357  | NM_145211 | Oas1a    | 246730 | 2'-5' oligoadenylate synthetase 1A                                                            | 3.99 | 7.69 | 0.00 |
| A_52_P161488  | NM_019948 | Clec4e   | 56619  | C-type lectin domain family 4, member e                                                       | 4.97 | 7.67 | 0.00 |
| A_51_P464064  | NM_026083 | Zc3h13   | 67302  | zinc finger CCCH type containing 13                                                           | 6.27 | 7.66 | 0.00 |
| A_52_P249514  | NM_011331 | Ccl12    | 20293  | chemokine (C-C motif) ligand 12                                                               | 5.39 | 7.66 | 0.00 |
| A_52_P256844  | NM_019442 | Stk19    | 54402  | serine/threonine kinase 19                                                                    | 4.90 | 7.65 | 0.00 |
| A_52_P140663  | NM_026579 | D10Wsu10 | 28109  | DNA segment, Chr 10, Wayne State University 102, expressed                                    | 4.41 | 7.64 | 0.00 |
| A_52_P260145  | XM_978721 | NA       | NA     | NA                                                                                            | 5.05 | 7.62 | 0.00 |
| A_52_P49321   | AK078802  | Adamts9  | 101401 | a disintegrin-like and metallopeptidase (reprolysin type) with thrombospondin type 1 motif, 9 | 5.23 | 7.62 | 0.00 |
| A_52_P228621  | NM_011610 | Tnfrsf1b | 21938  | tumor necrosis factor receptor superfamily, member 1b                                         | 5.41 | 7.62 | 0.00 |
| A_52_P65237   | NM_145356 | Zbtb7c   | 207259 | zinc finger and BTB domain containing 7C                                                      | 5.33 | 7.59 | 0.00 |
| A_51_P195506  | NM_007778 | Csf1     | 12977  | colony stimulating factor 1 (macrophage)                                                      | 6.09 | 7.54 | 0.00 |
| A_52_P63343   | NM_001033 | Gm129    | 229599 | predicted gene 129                                                                            | 4.47 | 7.50 | 0.00 |
| A_51_P114616  | NM_016767 | Batf     | 53314  | basic leucine zipper transcription factor, ATF-like                                           | 5.49 | 7.50 | 0.00 |

|              |           |           |        |                                                                  |      |      |      |
|--------------|-----------|-----------|--------|------------------------------------------------------------------|------|------|------|
| A_51_P245796 | NM_029083 | Ddit4     | 74747  | DNA-damage-inducible transcript 4                                | 3.91 | 7.49 | 0.00 |
| A_51_P382152 | NM_011171 | Procr     | 19124  | protein C receptor, endothelial                                  | 4.69 | 7.49 | 0.00 |
| A_51_P458384 | NM_175121 | Slc38a2   | 67760  | solute carrier family 38, member 2                               | 4.09 | 7.49 | 0.00 |
| A_52_P231610 | NM_028864 | Zc3hav1   | 78781  | zinc finger CCCH type, antiviral 1                               | 7.60 | 7.46 | 0.00 |
| A_52_P383653 | NM_001033 | Cpne8     | 66871  | copine VIII                                                      | 4.58 | 7.46 | 0.00 |
| A_51_P154987 | NM_022409 | Zfp296    | 63872  | zinc finger protein 296                                          | 5.75 | 7.44 | 0.00 |
| A_51_P502203 | AK035099  | Asap3     | 230837 | ArfGAP with SH3 domain, ankyrin repeat and PH domain 3           | 5.67 | 7.44 | 0.00 |
| A_51_P234728 | NM_175116 | Lpar6     | 67168  | lysophosphatidic acid receptor 6                                 | 5.50 | 7.39 | 0.00 |
| A_52_P947137 | AK039992  | Rnd1      | 223881 | Rho family GTPase 1                                              | 6.18 | 7.38 | 0.00 |
| A_52_P244463 | AK033828  | D16Ertd47 | 67102  | DNA segment, Chr 16, ERATO Doi 472, expressed                    | 6.90 | 7.37 | 0.00 |
| A_52_P826021 | NM_020283 | B3galt1   | 26877  | UDP-Gal:betaGlcNAc beta 1,3-galactosyltransferase, polypeptide 1 | 5.18 | 7.36 | 0.00 |
| A_51_P449171 | NM_007464 | Birc3     | 11796  | baculoviral IAP repeat-containing 3                              | 6.81 | 7.36 | 0.00 |
| A_51_P284442 | NM_026739 | 9530077C0 | 68283  | RIKEN cDNA 9530077C05 gene                                       | 4.33 | 7.35 | 0.00 |
| A_51_P103320 | AK173162  | Jmjd1c    | 108829 | jumonji domain containing 1C                                     | 4.98 | 7.34 | 0.00 |
| A_52_P981697 | NM_177712 | Zfp874    | 238692 | zinc finger protein 874                                          | 3.04 | 7.31 | 0.00 |
| A_52_P544540 | AK220437  | BC016423  | 105203 | cDNA sequence BC016423                                           | 5.16 | 7.30 | 0.00 |
| A_52_P597800 | NM_007961 | Etv6      | 14011  | ets variant gene 6 (TEL oncogene)                                | 7.22 | 7.24 | 0.00 |
| A_52_P301935 | NM_001033 | Il20rb    | 213208 | interleukin 20 receptor beta                                     | 4.66 | 7.23 | 0.00 |
| A_52_P394767 | NM_173761 | Ythdf1    | 228994 | YTH domain family 1                                              | 6.28 | 7.23 | 0.00 |
| A_52_P371154 | NM_144792 | Sgms1     | 208449 | sphingomyelin synthase 1                                         | 4.60 | 7.22 | 0.00 |
| A_51_P164667 | NM_008211 | H3f3b     | 15081  | H3 histone, family 3B                                            | 5.87 | 7.21 | 0.00 |
| A_52_P108346 | NM_010849 | Myc       | 17869  | myelocytomatosis oncogene                                        | 4.21 | 7.18 | 0.00 |
| A_51_P217218 | NM_031168 | Il6       | 16193  | interleukin 6                                                    | 4.59 | 7.12 | 0.00 |
| A_52_P393488 | NM_029499 | Ms4a4c    | 64380  | membrane-spanning 4-domains, subfamily A, member 4C              | 4.93 | 7.11 | 0.00 |
| A_51_P310773 | BC004022  | N4bp1     | 80750  | NEDD4 binding protein 1                                          | 6.30 | 7.11 | 0.00 |
| A_52_P61786  | NM_008211 | H3f3b     | 15081  | H3 histone, family 3B                                            | 5.67 | 7.11 | 0.00 |
| A_52_P31543  | NM_007570 | Btg2      | 12227  | B-cell translocation gene 2, anti-proliferative                  | 3.41 | 7.06 | 0.00 |
| A_51_P128526 | NM_011200 | Ptp4a1    | 19243  | protein tyrosine phosphatase 4a1                                 | 5.09 | 7.06 | 0.00 |
| A_51_P233797 | NM_009626 | Adh7      | 11529  | alcohol dehydrogenase 7 (class IV), mu or sigma polypeptide      | 3.68 | 7.06 | 0.00 |
| A_52_P100926 | NM_010554 | Il1a      | 16175  | interleukin 1 alpha                                              | 4.13 | 7.04 | 0.00 |

|              |           |           |        |                                                                                                                      |      |      |      |
|--------------|-----------|-----------|--------|----------------------------------------------------------------------------------------------------------------------|------|------|------|
| A_52_P77837  | NM_026004 | Nt5c3     | 107569 | 5'-nucleotidase, cytosolic III                                                                                       | 5.38 | 7.03 | 0.00 |
| A_52_P587378 | NM_011200 | Ptp4a1    | 19243  | protein tyrosine phosphatase 4a1                                                                                     | 3.86 | 7.02 | 0.00 |
| A_51_P359462 | NM_178216 | Hist2h3c1 | 15077  | histone cluster 2, H3c1                                                                                              | 5.37 | 7.00 | 0.00 |
| A_51_P421958 | NM_144792 | Sgms1     | 208449 | sphingomyelin synthase 1                                                                                             | 4.93 | 6.99 | 0.00 |
| A_51_P370975 | NM_011200 | Ptp4a1    | 19243  | protein tyrosine phosphatase 4a1                                                                                     | 5.91 | 6.98 | 0.00 |
| A_51_P492488 | NM_178204 | Hist1h3d  | 319149 | histone cluster 1, H3d                                                                                               | 4.96 | 6.98 | 0.00 |
| A_51_P155052 | NM_053247 | Lyve1     | 114332 | lymphatic vessel endothelial hyaluronan receptor 1<br>transporter 1, ATP-binding cassette, sub-family B<br>(MDR/TAP) | 5.04 | 6.97 | 0.00 |
| A_51_P100327 | NM_013683 | Tap1      | 21354  | (MDR/TAP)                                                                                                            | 6.17 | 6.95 | 0.00 |
| A_52_P594756 | NM_023048 | Asb4      | 65255  | ankyrin repeat and SOCS box-containing 4                                                                             | 5.83 | 6.95 | 0.00 |
| A_51_P383032 | NM_010819 | Clec4d    | 17474  | C-type lectin domain family 4, member d                                                                              | 5.45 | 6.94 | 0.00 |
| A_52_P496726 | NM_009026 | Rasd1     | 19416  | RAS, dexamethasone-induced 1                                                                                         | 5.48 | 6.92 | 0.00 |
| A_52_P299771 | NM_007535 | Bcl2a1c   | 12046  | B-cell leukemia/lymphoma 2 related protein A1c                                                                       | 5.61 | 6.91 | 0.00 |
| A_51_P327261 | NM_021327 | Tnip1     | 57783  | TNFAIP3 interacting protein 1                                                                                        | 5.53 | 6.90 | 0.00 |
| A_52_P103628 | NA        | NA        | NA     | NA                                                                                                                   | 4.19 | 6.88 | 0.00 |
| A_52_P608322 | NM_010755 | Maff      | 17133  | v-maf musculoaponeurotic fibrosarcoma oncogene<br>family, protein F (avian)                                          | 4.64 | 6.88 | 0.00 |
| A_52_P402885 | AK009002  | Inpp1     | 16329  | inositol polyphosphate-1-phosphatase                                                                                 | 4.67 | 6.85 | 0.00 |
| A_52_P672689 | NM_007568 | Btc       | 12223  | betacellulin, epidermal growth factor family member                                                                  | 5.15 | 6.81 | 0.00 |
| A_52_P576230 | NM_001004 | Tacc2     | 57752  | transforming, acidic coiled-coil containing protein 2                                                                | 5.83 | 6.80 | 0.00 |
| A_51_P159201 | NM_008416 | Junb      | 16477  | Jun-B oncogene                                                                                                       | 4.47 | 6.79 | 0.00 |
| A_51_P285462 | NM_146276 | Olf1394   | 258273 | olfactory receptor 1394                                                                                              | 6.30 | 6.79 | 0.00 |
| A_51_P420489 | NM_134246 | Acot3     | 171281 | acyl-CoA thioesterase 3                                                                                              | 2.25 | 6.78 | 0.01 |
| A_51_P367866 | NM_007913 | Egr1      | 13653  | early growth response 1                                                                                              | 3.82 | 6.77 | 0.00 |
| A_52_P460393 | NM_146232 | BC014805  | 236149 | cDNA sequence BC014805                                                                                               | 4.74 | 6.77 | 0.00 |
| A_52_P644273 | NM_028679 | Irak3     | 73914  | interleukin-1 receptor-associated kinase 3                                                                           | 5.44 | 6.75 | 0.00 |
| A_51_P312121 | NM_011723 | Xdh       | 22436  | xanthine dehydrogenase                                                                                               | 6.02 | 6.74 | 0.00 |
| A_51_P381821 | NM_008046 | Fst       | 14313  | follistatin                                                                                                          | 3.30 | 6.70 | 0.00 |
| A_51_P122321 | NM_133775 | Il33      | 77125  | interleukin 33                                                                                                       | 4.20 | 6.69 | 0.00 |
| A_52_P616332 | NM_153389 | Atp10d    | 231287 | ATPase, class V, type 10D                                                                                            | 2.39 | 6.67 | 0.01 |
| A_52_P127358 | NM_007961 | Etv6      | 14011  | ets variant gene 6 (TEL oncogene)                                                                                    | 6.15 | 6.67 | 0.00 |

|              |            |            |        |                                                                                                       |      |      |      |
|--------------|------------|------------|--------|-------------------------------------------------------------------------------------------------------|------|------|------|
| A_52_P510790 | NA         | NA         | NA     | NA                                                                                                    | 5.17 | 6.65 | 0.00 |
| A_52_P471812 | XM_0010041 | NA         | NA     | NA                                                                                                    | 4.54 | 6.65 | 0.00 |
| A_52_P646979 | NM_025967  | D16Ertd47: | 67102  | DNA segment, Chr 16, ERATO Doi 472, expressed<br>CLP1, cleavage and polyadenylation factor I subunit, | 5.95 | 6.64 | 0.00 |
| A_51_P407193 | NM_133840  | Clp1       | 98985  | homolog ( <i>S. cerevisiae</i> )                                                                      | 5.83 | 6.63 | 0.00 |
| A_51_P317512 | AK162420   | 5730508B0  | 70617  | RIKEN cDNA 5730508B09 gene<br>solute carrier family 15 (H+/peptide transporter),                      | 5.58 | 6.61 | 0.00 |
| A_51_P267278 | NM_021301  | Slc15a2    | 57738  | member 2                                                                                              | 3.09 | 6.59 | 0.00 |
| A_51_P483231 | NM_008413  | Jak2       | 16452  | Janus kinase 2                                                                                        | 3.90 | 6.58 | 0.00 |
| A_52_P35801  | NM_010807  | Marcks1    | 17357  | MARCKS-like 1                                                                                         | 4.56 | 6.54 | 0.00 |
| A_51_P469188 | NM_175472  | Zcchc11    | 230594 | zinc finger, CCHC domain containing 11                                                                | 4.39 | 6.53 | 0.00 |
| A_51_P136542 | NM_033601  | Bcl3       | 12051  | B-cell leukemia/lymphoma 3                                                                            | 4.45 | 6.52 | 0.00 |
| A_51_P453149 | NM_008301  | Hspa2      | 15512  | heat shock protein 2                                                                                  | 4.46 | 6.52 | 0.00 |
| A_51_P488890 | NM_013632  | Pnp1       | 18950  | purine-nucleoside phosphorylase 1                                                                     | 3.79 | 6.49 | 0.00 |
| A_51_P306031 | NA         | NA         | NA     | NA                                                                                                    | 5.89 | 6.49 | 0.00 |
| A_51_P182796 | NM_009373  | Tgm2       | 21817  | transglutaminase 2, C polypeptide                                                                     | 4.35 | 6.49 | 0.00 |
| A_52_P602018 | BQ963610   | Tor1aip1   | 208263 | torsin A interacting protein 1<br>human immunodeficiency virus type I enhancer binding                | 5.48 | 6.49 | 0.00 |
| A_51_P443754 | NM_010437  | Hivep2     | 15273  | protein 2                                                                                             | 6.15 | 6.41 | 0.00 |
| A_51_P407989 | NM_029508  | Pcgf5      | 76073  | polycomb group ring finger 5                                                                          | 5.72 | 6.40 | 0.00 |
| A_51_P207934 | NM_199016  | Enpp4      | 224794 | ectonucleotide pyrophosphatase/phosphodiesterase 4                                                    | 5.23 | 6.40 | 0.00 |
| A_51_P512384 | NM_001044: | Timp1      | 21857  | tissue inhibitor of metalloproteinase 1                                                               | 5.33 | 6.39 | 0.00 |
| A_52_P676686 | NM_175121  | Slc38a2    | 67760  | solute carrier family 38, member 2                                                                    | 5.59 | 6.39 | 0.00 |
| A_52_P354306 | NM_028730  | Pex26      | 74043  | peroxisomal biogenesis factor 26                                                                      | 4.47 | 6.34 | 0.00 |
| A_51_P350453 | NM_013743  | Pdk4       | 27273  | pyruvate dehydrogenase kinase, isoenzyme 4                                                            | 2.09 | 6.34 | 0.03 |
| A_52_P947847 | AK041062   | Gm4951     | 240327 | predicted gene 4951                                                                                   | 5.78 | 6.34 | 0.00 |
| A_52_P467389 | NM_023044  | Slc15a3    | 65221  | solute carrier family 15, member 3                                                                    | 4.94 | 6.34 | 0.00 |
| A_51_P411917 | NM_010258  | Gata6      | 14465  | GATA binding protein 6                                                                                | 5.25 | 6.34 | 0.00 |
| A_52_P512201 | NM_175397  | Sp110      | 109032 | Sp110 nuclear body protein                                                                            | 4.69 | 6.34 | 0.00 |
| A_52_P427640 | XR_002113  | EG667984   | 667984 | predicted gene, EG667984<br>nuclear factor of kappa light polypeptide gene enhancer                   | 3.52 | 6.33 | 0.00 |
| A_51_P454217 | NM_019408  | Nfkb2      | 18034  | in B-cells 2, p49/p100                                                                                | 6.49 | 6.33 | 0.00 |
| A_52_P479389 | NM_177861  | Tmem67     | 329795 | transmembrane protein 67                                                                              | 4.31 | 6.33 | 0.00 |

|              |           |            |        |                                                                                                                  |      |      |      |
|--------------|-----------|------------|--------|------------------------------------------------------------------------------------------------------------------|------|------|------|
| A_51_P514319 | NM_172892 | Slc13a4    | 243755 | solute carrier family 13 (sodium/sulfate symporters), member 4                                                   | 5.85 | 6.32 | 0.00 |
| A_52_P462071 | NM_178798 | Slc7a6     | 330836 | solute carrier family 7 (cationic amino acid transporter, y+ system), member 6                                   | 4.48 | 6.31 | 0.00 |
| A_51_P440568 | NM_019442 | Stk19      | 54402  | serine/threonine kinase 19                                                                                       | 4.41 | 6.31 | 0.00 |
| A_51_P277994 | NM_145227 | Oas2       | 246728 | 2'-5' oligoadenylate synthetase 2                                                                                | 3.86 | 6.30 | 0.00 |
| A_51_P303332 | BC020137  | Mitd1      | 69028  | MIT, microtubule interacting and transport, domain containing 1                                                  | 5.50 | 6.30 | 0.00 |
| A_51_P490867 | NM_199016 | Enpp4      | 224794 | ectonucleotide pyrophosphatase/phosphodiesterase 4                                                               | 5.14 | 6.28 | 0.00 |
| A_52_P686785 | NM_053247 | Lyve1      | 114332 | lymphatic vessel endothelial hyaluronan receptor 1                                                               | 3.79 | 6.27 | 0.00 |
| A_52_P429450 | NM_008694 | Ngp        | 18054  | neutrophilic granule protein                                                                                     | 4.14 | 6.27 | 0.00 |
| A_52_P520495 | NM_011693 | Vcam1      | 22329  | vascular cell adhesion molecule 1                                                                                | 5.46 | 6.25 | 0.00 |
| A_52_P161762 | NM_181411 | Aftph      | 216549 | aftiphilin                                                                                                       | 5.30 | 6.24 | 0.00 |
| A_52_P654161 | NM_009546 | Trim25     | 217069 | tripartite motif-containing 25                                                                                   | 4.65 | 6.24 | 0.00 |
| A_52_P50529  | BC116253  | Nlrp12     | 378425 | NLR family, pyrin domain containing 12                                                                           | 3.15 | 6.24 | 0.00 |
| A_51_P503162 | NM_011803 | Klf6       | 23849  | Kruppel-like factor 6                                                                                            | 5.16 | 6.24 | 0.00 |
| A_52_P382040 | NM_175472 | Zcchc11    | 230594 | zinc finger, CCHC domain containing 11                                                                           | 4.72 | 6.22 | 0.00 |
| A_51_P144052 | BC035551  | Aim1       | 11630  | absent in melanoma 1                                                                                             | 5.45 | 6.21 | 0.00 |
| A_52_P666442 | XR_001627 | Gm8995     | 668139 | predicted gene 8995                                                                                              | 5.41 | 6.20 | 0.00 |
| A_51_P156857 | NM_134133 | 2010002N04 | 106878 | RIKEN cDNA 2010002N04 gene                                                                                       | 5.68 | 6.18 | 0.00 |
| A_52_P229943 | NM_178933 | Ostb       | 330962 | organic solute transporter beta                                                                                  | 4.30 | 6.17 | 0.00 |
| A_51_P223686 | NM_008505 | Lmo2       | 16909  | LIM domain only 2                                                                                                | 4.48 | 6.17 | 0.00 |
| A_52_P254607 | NM_019442 | Stk19      | 54402  | serine/threonine kinase 19                                                                                       | 4.68 | 6.17 | 0.00 |
| A_51_P499698 | BC057938  | Asprv1     | 67855  | aspartic peptidase, retroviral-like 1                                                                            | 5.88 | 6.16 | 0.00 |
| A_52_P35895  | NM_001035 | Akap2      | 11641  | A kinase (PRKA) anchor protein 2                                                                                 | 6.19 | 6.15 | 0.00 |
| A_51_P193019 | NM_011157 | Srgn       | 19073  | serglycin                                                                                                        | 4.17 | 6.14 | 0.00 |
| A_51_P409101 | AK006216  | Cdhr4      | 69398  | cadherin-related family member 4                                                                                 | 3.55 | 6.13 | 0.00 |
| A_51_P222936 | AK080318  | Fmnl2      | 71409  | formin-like 2                                                                                                    | 5.42 | 6.12 | 0.00 |
| A_51_P170651 | S79463    | Sema4c     | 20353  | sema domain, immunoglobulin domain (Ig), transmembrane domain (TM) and short cytoplasmic domain, (semaphorin) 4C | 6.05 | 6.12 | 0.00 |
| A_51_P412732 | NM_025967 | D16Ertd47  | 67102  | DNA segment, Chr 16, ERATO Doi 472, expressed                                                                    | 3.98 | 6.11 | 0.00 |



|              |           |          |        |                                                               |      |      |      |
|--------------|-----------|----------|--------|---------------------------------------------------------------|------|------|------|
| A_51_P446232 | NM_019813 | Dbn1     | 56320  | drebrin 1                                                     | 5.58 | 6.11 | 0.00 |
| A_51_P225665 | NM_010784 | Mdk      | 17242  | midkine                                                       | 4.14 | 6.10 | 0.00 |
| A_51_P383689 | NM_010220 | Fkbp5    | 14229  | FK506 binding protein 5                                       | 5.56 | 6.07 | 0.00 |
| A_51_P512379 | NA        | NA       | NA     | NA                                                            | 4.73 | 6.07 | 0.00 |
| A_51_P118637 | NM_026083 | Zc3h13   | 67302  | zinc finger CCCH type containing 13                           | 3.88 | 6.05 | 0.00 |
| A_51_P361448 | NM_028903 | Scara5   | 71145  | scavenger receptor class A, member 5 (putative)               | 3.59 | 6.04 | 0.00 |
| A_51_P326015 | NM_153287 | Csrnp1   | 215418 | cysteine-serine-rich nuclear protein 1                        | 4.78 | 6.03 | 0.00 |
| A_51_P387810 | NM_027835 | Ifih1    | 71586  | interferon induced with helicase C domain 1                   | 5.82 | 6.02 | 0.00 |
| A_51_P241457 | NM_013532 | Lilrb4   | 14728  | leukocyte immunoglobulin-like receptor, subfamily B, member 4 | 4.17 | 6.02 | 0.00 |
| A_51_P451346 | NM_011803 | Klf6     | 23849  | Kruppel-like factor 6                                         | 4.70 | 6.02 | 0.00 |
| A_52_P354823 | NM_008320 | Irf8     | 15900  | interferon regulatory factor 8                                | 5.61 | 6.01 | 0.00 |
| A_51_P417854 | NM_011227 | Rab20    | 19332  | RAB20, member RAS oncogene family                             | 3.81 | 6.00 | 0.00 |
| A_52_P117352 | NM_008120 | Gja4     | 14612  | gap junction protein, alpha 4                                 | 5.25 | 5.96 | 0.00 |
| A_52_P371922 | XM_988404 | NA       | NA     | NA                                                            | 5.38 | 5.95 | 0.00 |
| A_51_P342688 | NM_010583 | Itk      | 16428  | IL2-inducible T-cell kinase                                   | 2.51 | 5.94 | 0.00 |
| A_51_P482990 | NM_145996 | Arid5a   | 214855 | AT rich interactive domain 5A (MRF1-like)                     | 5.20 | 5.90 | 0.00 |
| A_51_P313185 | NM_172571 | Fbf1     | 217335 | Fas (TNFRSF6) binding factor 1                                | 3.69 | 5.90 | 0.00 |
| A_52_P851862 | AK080781  | NA       | NA     | NA                                                            | 4.04 | 5.90 | 0.00 |
| A_52_P286511 | NM_021352 | Crybb3   | 12962  | crystallin, beta B3                                           | 3.37 | 5.89 | 0.00 |
| A_52_P500027 | NM_017373 | Nfil3    | 18030  | nuclear factor, interleukin 3, regulated                      | 2.68 | 5.89 | 0.00 |
| A_52_P476950 | AK171679  | Ncoa7    | 211329 | nuclear receptor coactivator 7                                | 4.47 | 5.89 | 0.00 |
| A_51_P166818 | NM_030243 | Rbm43    | 71684  | RNA binding motif protein 43                                  | 4.42 | 5.87 | 0.00 |
| A_52_P748533 | BX529199  | NA       | NA     | NA                                                            | 4.23 | 5.86 | 0.00 |
| A_51_P296448 | NM_007610 | Casp2    | 12366  | caspase 2                                                     | 5.73 | 5.86 | 0.00 |
| A_51_P282983 | NM_144808 | Slc39a14 | 213053 | solute carrier family 39 (zinc transporter), member 14        | 4.12 | 5.85 | 0.00 |
| A_51_P475155 | AK015966  | Rnf19b   | 75234  | ring finger protein 19B                                       | 4.57 | 5.82 | 0.00 |
| A_51_P255360 | NM_026004 | Nt5c3    | 107569 | 5'-nucleotidase, cytosolic III                                | 5.28 | 5.82 | 0.00 |
| A_51_P182794 | NM_009373 | Tgm2     | 21817  | transglutaminase 2, C polypeptide                             | 4.06 | 5.81 | 0.00 |
| A_51_P167489 | XM_140451 | Lama3    | 16774  | laminin, alpha 3                                              | 3.84 | 5.80 | 0.00 |
| A_51_P222280 | NM_019777 | Ikbke    | 56489  | inhibitor of kappaB kinase epsilon                            | 4.94 | 5.80 | 0.00 |
| A_51_P352594 | NM_001001 | St5      | 76954  | suppression of tumorigenicity 5                               | 4.07 | 5.79 | 0.00 |
| A_52_P259817 | NM_029692 | Upp2     | 76654  | uridine phosphorylase 2                                       | 3.72 | 5.79 | 0.00 |

|              |           |           |        |                                                                                                        |      |      |      |
|--------------|-----------|-----------|--------|--------------------------------------------------------------------------------------------------------|------|------|------|
| A_52_P650553 | NM_001039 | Coq10b    | 67876  | coenzyme Q10 homolog B ( <i>S. cerevisiae</i> )                                                        | 3.47 | 5.79 | 0.00 |
| A_51_P393748 | NM_172689 | Ddx58     | 230073 | DEAD (Asp-Glu-Ala-Asp) box polypeptide 58                                                              | 4.44 | 5.77 | 0.00 |
| A_51_P226472 | NM_001035 | Akap2     | 11641  | A kinase (PRKA) anchor protein 2                                                                       | 4.80 | 5.77 | 0.00 |
| A_51_P300717 | NM_009295 | Stxbp1    | 20910  | syntaxin binding protein 1                                                                             | 4.26 | 5.76 | 0.00 |
| A_51_P485756 | NM_024435 | Nts       | 67405  | neurotensin                                                                                            | 3.36 | 5.76 | 0.00 |
| A_52_P412465 | NM_007520 | Bach1     | 12013  | BTB and CNC homology 1                                                                                 | 3.51 | 5.75 | 0.00 |
| A_51_P169850 | NM_019786 | Tbk1      | 56480  | TANK-binding kinase 1                                                                                  | 4.22 | 5.75 | 0.00 |
| A_52_P658122 | NM_011809 | Ets2      | 23872  | E26 avian leukemia oncogene 2, 3' domain                                                               | 4.43 | 5.75 | 0.00 |
| A_51_P173043 | NM_010118 | Egr2      | 13654  | early growth response 2                                                                                | 2.57 | 5.75 | 0.00 |
| A_52_P532029 | NM_019786 | Tbk1      | 56480  | TANK-binding kinase 1                                                                                  | 4.28 | 5.74 | 0.00 |
| A_52_P131423 | AK007371  | Mbd1      | 17190  | methyl-CpG binding domain protein 1                                                                    | 3.63 | 5.74 | 0.00 |
| A_52_P616392 | NM_183426 | Sbno2     | 216161 | strawberry notch homolog 2 ( <i>Drosophila</i> )<br>serine (or cysteine) peptidase inhibitor, clade A, | 5.69 | 5.73 | 0.00 |
| A_51_P159453 | NM_009252 | Serpina3n | 20716  | member 3N                                                                                              | 3.81 | 5.73 | 0.00 |
| A_51_P444290 | NM_029084 | Slamf8    | 74748  | SLAM family member 8                                                                                   | 3.61 | 5.70 | 0.00 |
| A_52_P486964 | NA        | NA        | NA     | NA                                                                                                     | 1.66 | 5.70 | 0.20 |
| A_52_P614888 | NM_022028 | Sav1      | 64010  | salvador homolog 1 ( <i>Drosophila</i> )                                                               | 6.22 | 5.69 | 0.00 |
| A_51_P493857 | NM_011835 | Katna1    | 23924  | katanin p60 (ATPase-containing) subunit A1                                                             | 4.25 | 5.68 | 0.00 |
| A_51_P214747 | NM_172893 | Parp12    | 243771 | poly (ADP-ribose) polymerase family, member 12                                                         | 3.96 | 5.68 | 0.00 |
| A_52_P437421 | NM_028472 | Bmper     | 73230  | BMP-binding endothelial regulator                                                                      | 4.73 | 5.68 | 0.00 |
| A_52_P590474 | NM_019937 | Ccnl1     | 56706  | cyclin L1                                                                                              | 4.77 | 5.64 | 0.00 |
| A_52_P678281 | NM_175472 | Zcchc11   | 230594 | zinc finger, CCHC domain containing 11                                                                 | 5.87 | 5.64 | 0.00 |
| A_52_P109378 | NM_008039 | Fpr2      | 14289  | formyl peptide receptor 2                                                                              | 4.95 | 5.64 | 0.00 |
| A_52_P636742 | NM_175136 | Rnf122    | 68867  | ring finger protein 122                                                                                | 6.01 | 5.63 | 0.00 |
| A_51_P291417 | NM_009378 | Thbd      | 21824  | thrombomodulin                                                                                         | 2.84 | 5.62 | 0.00 |
| A_52_P422494 | NM_145634 | Cd300lf   | 246746 | CD300 antigen like family member F                                                                     | 4.34 | 5.60 | 0.00 |
| A_51_P131442 | NM_013874 | Dpf1      | 29861  | D4, zinc and double PHD fingers family 1                                                               | 1.41 | 5.60 | 0.61 |
| A_52_P366525 | NM_001039 | Coq10b    | 67876  | coenzyme Q10 homolog B ( <i>S. cerevisiae</i> )                                                        | 5.24 | 5.57 | 0.00 |
| A_51_P438283 | NM_010554 | Il1a      | 16175  | interleukin 1 alpha                                                                                    | 3.60 | 5.57 | 0.00 |
| A_51_P477046 | NM_011903 | Tlk2      | 24086  | tousled-like kinase 2 ( <i>Arabidopsis</i> )                                                           | 3.91 | 5.57 | 0.00 |
| A_51_P199199 | NM_031376 | Pik3ap1   | 83490  | phosphoinositide-3-kinase adaptor protein 1                                                            | 3.77 | 5.56 | 0.00 |
| A_51_P414412 | NM_172275 | Trafd1    | 231712 | TRAF type zinc finger domain containing 1                                                              | 5.37 | 5.56 | 0.00 |
| A_52_P641597 | NM_145931 | Zc3h7a    | 106205 | zinc finger CCCH type containing 7 A                                                                   | 3.95 | 5.55 | 0.00 |

|              |           |           |        |                                                                                               |      |      |      |
|--------------|-----------|-----------|--------|-----------------------------------------------------------------------------------------------|------|------|------|
| A_52_P136316 | AK128954  | Samhd1    | 56045  | SAM domain and HD domain, 1                                                                   | 4.09 | 5.55 | 0.00 |
| A_52_P206925 | NM_177460 | Parp16    | 214424 | poly (ADP-ribose) polymerase family, member 16                                                | 3.96 | 5.54 | 0.00 |
| A_52_P619820 | NM_001033 | Pnrc1     | 108767 | proline-rich nuclear receptor coactivator 1                                                   | 3.97 | 5.53 | 0.00 |
| A_52_P530291 | NM_008842 | Pim1      | 18712  | proviral integration site 1                                                                   | 4.95 | 5.53 | 0.00 |
| A_51_P114314 | AK017419  | 5530400B0 | 71434  | RIKEN cDNA 5530400B01 gene                                                                    | 4.24 | 5.53 | 0.00 |
| A_51_P314547 | AK019935  | NA        | NA     | NA                                                                                            | 5.72 | 5.51 | 0.00 |
| A_51_P309158 | NM_027840 | Snx20     | 71607  | sorting nexin 20                                                                              | 3.36 | 5.50 | 0.00 |
| A_51_P486660 | NM_172275 | Trafd1    | 231712 | TRAF type zinc finger domain containing 1                                                     | 5.31 | 5.49 | 0.00 |
| A_51_P378789 | NM_018866 | Cxcl13    | 55985  | chemokine (C-X-C motif) ligand 13                                                             | 5.27 | 5.47 | 0.00 |
| A_51_P113137 | NM_007920 | Elf1      | 13709  | E74-like factor 1                                                                             | 4.81 | 5.46 | 0.00 |
| A_51_P319917 | NM_007403 | Adam8     | 11501  | a disintegrin and metallopeptidase domain 8                                                   | 3.14 | 5.46 | 0.00 |
| A_52_P636830 | NM_011816 | G3bp2     | 23881  | GTPase activating protein (SH3 domain) binding protein 2                                      | 5.07 | 5.46 | 0.00 |
| A_51_P255765 | NM_001039 | Coq10b    | 67876  | coenzyme Q10 homolog B ( <i>S. cerevisiae</i> )                                               | 5.36 | 5.45 | 0.00 |
| A_52_P26161  | NM_008987 | Ptx3      | 19288  | pentraxin related gene                                                                        | 3.39 | 5.42 | 0.00 |
| A_51_P260683 | NM_015811 | Rgs1      | 50778  | regulator of G-protein signaling 1                                                            | 3.03 | 5.41 | 0.00 |
| A_51_P374646 | AK050573  | NA        | NA     | NA                                                                                            | 4.05 | 5.41 | 0.00 |
| A_51_P218984 | NM_030253 | Parp9     | 80285  | poly (ADP-ribose) polymerase family, member 9                                                 | 5.09 | 5.40 | 0.00 |
| A_51_P448741 | NM_009425 | Tnfsf10   | 22035  | tumor necrosis factor (ligand) superfamily, member 10                                         | 4.31 | 5.40 | 0.00 |
| A_52_P214630 | NM_011448 | Sox9      | 20682  | SRY-box containing gene 9                                                                     | 3.86 | 5.38 | 0.00 |
| A_51_P234944 | NM_172845 | Adamts4   | 240913 | a disintegrin-like and metallopeptidase (reprolysin type) with thrombospondin type 1 motif, 4 | 3.53 | 5.34 | 0.00 |
| A_52_P254095 | NM_010818 | Cd200     | 17470  | CD200 antigen                                                                                 | 4.15 | 5.33 | 0.00 |
| A_52_P373893 | AK154578  | Acvr1b    | 11479  | activin A receptor, type 1B                                                                   | 5.00 | 5.32 | 0.00 |
| A_51_P362483 | BC053747  | Slc43a1   | 72401  | solute carrier family 43, member 1                                                            | 4.14 | 5.31 | 0.00 |
| A_51_P340200 | NM_011816 | G3bp2     | 23881  | GTPase activating protein (SH3 domain) binding protein 2                                      | 5.08 | 5.31 | 0.00 |
| A_51_P205209 | NM_018729 | Cd244     | 18106  | CD244 natural killer cell receptor 2B4                                                        | 3.59 | 5.29 | 0.00 |
| A_51_P361650 | NM_009117 | Saa1      | 20208  | serum amyloid A 1                                                                             | 2.68 | 5.27 | 0.00 |
| A_51_P231320 | NM_008611 | Mmp8      | 17394  | matrix metallopeptidase 8                                                                     | 4.72 | 5.26 | 0.00 |
| A_52_P398925 | NM_173869 | Stfa2l1   | 268885 | stefin A2 like 1                                                                              | 3.51 | 5.25 | 0.00 |

|               |           |                 |        |                                                                                                |      |      |      |
|---------------|-----------|-----------------|--------|------------------------------------------------------------------------------------------------|------|------|------|
| A_52_P656714  | NM_008580 | Map3k5          | 26408  | mitogen-activated protein kinase kinase kinase 5                                               | 4.63 | 5.24 | 0.00 |
| A_52_P451888  | NM_011903 | Tlk2            | 24086  | tousled-like kinase 2 (Arabidopsis)                                                            | 4.11 | 5.23 | 0.00 |
| A_51_P270339  | NM_031376 | Pik3ap1         | 83490  | phosphoinositide-3-kinase adaptor protein 1                                                    | 3.85 | 5.22 | 0.00 |
| A_52_P292596  | AK006333  | Exosc1          | 66583  | exosome component 1                                                                            | 1.68 | 5.22 | 0.18 |
| A_51_P158538  | NM_011756 | Zfp36           | 22695  | zinc finger protein 36                                                                         | 3.94 | 5.21 | 0.00 |
| A_51_P199135  | NM_009856 | Cd83            | 12522  | CD83 antigen                                                                                   | 4.22 | 5.19 | 0.00 |
| A_51_P135340  | NM_019482 | Panx1           | 55991  | pannexin 1                                                                                     | 3.44 | 5.19 | 0.00 |
| A_52_P228491  | NM_001025 | Lrig2           | 269473 | leucine-rich repeats and immunoglobulin-like domains 2                                         | 4.94 | 5.18 | 0.00 |
| A_51_P132185  | NM_001001 | BC117090        | 1E+08  | cDNA sequence BC117090                                                                         | 3.27 | 5.17 | 0.00 |
| A_52_P384621  | NM_177725 | Lrrc8a          | 241296 | leucine rich repeat containing 8A                                                              | 2.69 | 5.17 | 0.00 |
| A_52_P484903  | NM_008037 | Fosl2           | 14284  | fos-like antigen 2                                                                             | 5.02 | 5.16 | 0.00 |
| A_52_P73385   | AK086933  | Fas             | 14102  | Fas (TNF receptor superfamily member 6)                                                        | 5.10 | 5.15 | 0.00 |
| A_52_P176245  | NM_010258 | Gata6           | 14465  | GATA binding protein 6                                                                         | 5.07 | 5.15 | 0.00 |
| A_52_P220879  | NM_009373 | Tgm2            | 21817  | transglutaminase 2, C polypeptide                                                              | 5.02 | 5.14 | 0.00 |
| A_51_P240501  | NM_026358 | 4930583H167749  |        | RIKEN cDNA 4930583H14 gene<br>apolipoprotein B mRNA editing enzyme, catalytic<br>polypeptide 1 | 2.89 | 5.13 | 0.00 |
| A_52_P55029   | NM_031159 | Apobec1         | 11810  | apolipoprotein B mRNA editing enzyme, catalytic<br>polypeptide 1                               | 4.80 | 5.12 | 0.00 |
| A_51_P282508  | NM_007484 | Rhoc            | 11853  | ras homolog gene family, member C                                                              | 4.46 | 5.11 | 0.00 |
| A_52_P222775  | NM_016693 | Map3k6          | 53608  | mitogen-activated protein kinase kinase kinase 6                                               | 3.25 | 5.11 | 0.00 |
| A_52_P1131540 | AK046587  | NA              | NA     | NA                                                                                             | 3.79 | 5.11 | 0.00 |
| A_51_P468240  | AK169826  | Dennd4a         | 102442 | DENN/MADD domain containing 4A                                                                 | 3.64 | 5.11 | 0.00 |
| A_51_P371750  | NM_010766 | Marco           | 17167  | macrophage receptor with collagenous structure                                                 | 2.49 | 5.10 | 0.00 |
| A_52_P35217   | NM_007570 | Btg2            | 12227  | B-cell translocation gene 2, anti-proliferative                                                | 3.46 | 5.09 | 0.00 |
| A_51_P190791  | AK152160  | Dcp2            | 70640  | DCP2 decapping enzyme homolog (S. cerevisiae)                                                  | 5.19 | 5.08 | 0.00 |
| A_52_P563280  | NM_001024 | BC094916        | 545384 | cDNA sequence BC094916                                                                         | 3.74 | 5.07 | 0.00 |
| A_51_P476767  | NM_010924 | Nnmt            | 18113  | nicotinamide N-methyltransferase                                                               | 2.83 | 5.06 | 0.00 |
| A_52_P624107  | BC094938  | Gm5039          | 266459 | eukaryotic translation initiation factor 1A pseudogene                                         | 3.83 | 5.05 | 0.00 |
| A_52_P291715  | NM_175472 | Zcchc11         | 230594 | zinc finger, CCHC domain containing 11                                                         | 4.98 | 5.04 | 0.00 |
| A_52_P70255   | NM_009283 | Stat1           | 20846  | signal transducer and activator of transcription 1                                             | 4.46 | 5.03 | 0.00 |
| A_52_P247927  | XM_901424 | 2810442I2:72735 |        | RIKEN cDNA 2810442I21 gene                                                                     | 4.75 | 5.00 | 0.00 |
| A_51_P286995  | NM_025653 | 3110001I2:66598 |        | RIKEN cDNA 3110001I22 gene                                                                     | 5.43 | 4.99 | 0.00 |
| A_51_P343833  | NM_009421 | Traf1           | 22029  | TNF receptor-associated factor 1                                                               | 3.92 | 4.99 | 0.00 |

|              |           |           |        |                                                                                       |      |      |      |
|--------------|-----------|-----------|--------|---------------------------------------------------------------------------------------|------|------|------|
| A_52_P556281 | BC048176  | G3bp2     | 23881  | GTPase activating protein (SH3 domain) binding protein 2                              | 4.95 | 4.99 | 0.00 |
| A_51_P412160 | NM_172572 | Rhbdf2    | 217344 | rhomboid 5 homolog 2 (Drosophila)                                                     | 3.29 | 4.99 | 0.00 |
| A_51_P169671 | NM_011036 | Reg3b     | 18489  | regenerating islet-derived 3 beta                                                     | 3.07 | 4.98 | 0.00 |
| A_51_P162326 | AK037062  | 9930105H1 | 100669 | RIKEN cDNA 9930105H17 gene                                                            | 2.73 | 4.98 | 0.00 |
| A_52_P8922   | NM_009229 | Sntb2     | 20650  | syntrophin, basic 2                                                                   | 4.15 | 4.98 | 0.00 |
| A_52_P178151 | NM_009320 | Slc6a6    | 21366  | solute carrier family 6 (neurotransmitter transporter, taurine), member 6             | 4.99 | 4.98 | 0.00 |
| A_51_P170807 | NM_016693 | Map3k6    | 53608  | mitogen-activated protein kinase kinase kinase 6                                      | 3.45 | 4.97 | 0.00 |
| A_51_P187253 | NM_008320 | Irf8      | 15900  | interferon regulatory factor 8                                                        | 4.75 | 4.96 | 0.00 |
| A_52_P487686 | NM_001001 | BC117090  | 1E+08  | cDNA sequence BC117090                                                                | 3.07 | 4.93 | 0.00 |
| A_52_P196476 | AK148276  | Slc11a2   | 18174  | solute carrier family 11 (proton-coupled divalent metal ion transporters), member 2   | 4.94 | 4.92 | 0.00 |
| A_52_P382854 | NM_172572 | Rhbdf2    | 217344 | rhomboid 5 homolog 2 (Drosophila)                                                     | 3.59 | 4.92 | 0.00 |
| A_51_P171883 | NM_023245 | Palmd     | 114301 | palmdelphin                                                                           | 5.84 | 4.92 | 0.00 |
| A_52_P538470 | NM_144882 | Spats2l   | 67198  | spermatogenesis associated, serine-rich 2-like                                        | 2.10 | 4.91 | 0.02 |
| A_52_P319552 | XM_161350 | 1700024P1 | 242594 | RIKEN cDNA 1700024P16 gene                                                            | 4.26 | 4.91 | 0.00 |
| A_52_P661071 | NR_003270 | Snhg3     | 399101 | small nucleolar RNA host gene (non-protein coding) 3                                  | 2.11 | 4.90 | 0.02 |
| A_51_P421140 | NM_026473 | Tubb6     | 67951  | tubulin, beta 6                                                                       | 4.02 | 4.90 | 0.00 |
| A_51_P280455 | AB034730  | Prg4      | 96875  | proteoglycan 4 (megakaryocyte stimulating factor, articular superficial zone protein) | 3.54 | 4.89 | 0.00 |
| A_51_P316951 | AK078889  | Wipf3     | 330319 | WAS/WASL interacting protein family, member 3                                         | 5.07 | 4.87 | 0.00 |
| A_51_P219505 | NM_177388 | Slc41a2   | 338365 | solute carrier family 41, member 2                                                    | 3.04 | 4.87 | 0.00 |
| A_51_P141288 | NM_010693 | Lck       | 16818  | lymphocyte protein tyrosine kinase                                                    | 3.12 | 4.86 | 0.00 |
| A_52_P643165 | BU531328  | Samd4     | 74480  | sterile alpha motif domain containing 4                                               | 4.94 | 4.84 | 0.00 |
| A_52_P605846 | NM_009883 | Cebpb     | 12608  | CCAAT/enhancer binding protein (C/EBP), beta                                          | 3.22 | 4.82 | 0.00 |
| A_52_P337899 | NM_010220 | Fkbp5     | 14229  | FK506 binding protein 5                                                               | 4.73 | 4.81 | 0.00 |
| A_51_P254471 | NM_007465 | Birc2     | 11797  | baculoviral IAP repeat-containing 2                                                   | 5.42 | 4.81 | 0.00 |
| A_52_P463977 | NM_197986 | Tmem140   | 68487  | transmembrane protein 140                                                             | 4.42 | 4.80 | 0.00 |
| A_52_P41292  | XM_981337 | LOC675366 | 675366 | similar to mitogen activated protein kinase kinase 5                                  | 4.17 | 4.80 | 0.00 |
| A_51_P286563 | NM_010303 | Gna13     | 14674  | guanine nucleotide binding protein, alpha 13                                          | 3.68 | 4.80 | 0.00 |

|               |           |          |        |                                                                       |      |      |      |
|---------------|-----------|----------|--------|-----------------------------------------------------------------------|------|------|------|
| A_51_P312795  | NM_008428 | Kcnj8    | 16523  | potassium inwardly-rectifying channel, subfamily J, member 8          | 4.14 | 4.78 | 0.00 |
| A_51_P134030  | NM_145210 | Oas1e    | 231699 | 2'-5' oligoadenylate synthetase 1E                                    | 4.42 | 4.72 | 0.00 |
| A_51_P241705  | NM_011201 | Ptpn1    | 19246  | protein tyrosine phosphatase, non-receptor type 1                     | 5.17 | 4.72 | 0.00 |
| A_51_P455807  | NM_133838 | Ehd4     | 98878  | EH-domain containing 4                                                | 3.66 | 4.71 | 0.00 |
| A_52_P332788  | XM_001006 | NA       | NA     | NA                                                                    | 4.75 | 4.69 | 0.00 |
| A_51_P129199  | BC024074  | Parp10   | 671535 | poly (ADP-ribose) polymerase family, member 10                        | 4.81 | 4.69 | 0.00 |
| A_52_P355139  | NM_001034 | Fam134b  | 66270  | family with sequence similarity 134, member B                         | 4.00 | 4.68 | 0.00 |
| A_52_P198473  | BG293250  | NA       | NA     | NA                                                                    | 4.15 | 4.67 | 0.00 |
| A_51_P505823  | NM_028013 | Endod1   | 71946  | endonuclease domain containing 1                                      | 3.83 | 4.67 | 0.00 |
| A_52_P127813  | XM_136331 | Gm4955   | 240921 | predicted gene 4955                                                   | 3.02 | 4.67 | 0.00 |
| A_52_P1013432 | NA        | NA       | NA     | NA                                                                    | 4.01 | 4.67 | 0.00 |
| A_51_P189746  | NM_145478 | Pim3     | 223775 | proviral integration site 3                                           | 3.57 | 4.65 | 0.00 |
| A_51_P215489  | NM_153062 | Slc37a1  | 224674 | solute carrier family 37 (glycerol-3-phosphate transporter), member 1 | 3.49 | 4.64 | 0.00 |
| A_51_P374726  | NM_008987 | Ptx3     | 19288  | pentraxin related gene                                                | 3.02 | 4.64 | 0.00 |
| A_52_P423247  | NM_019840 | Pde4b    | 18578  | phosphodiesterase 4B, cAMP specific                                   | 4.11 | 4.63 | 0.00 |
| A_51_P464703  | NM_021443 | Ccl8     | 20307  | chemokine (C-C motif) ligand 8                                        | 3.91 | 4.62 | 0.00 |
| A_51_P501278  | NM_139064 | Tnip2    | 231130 | TNFAIP3 interacting protein 2                                         | 4.42 | 4.61 | 0.00 |
| A_51_P428578  | NM_025459 | Fam134b  | 66270  | family with sequence similarity 134, member B                         | 4.55 | 4.61 | 0.00 |
| A_52_P70261   | NM_009283 | Stat1    | 20846  | signal transducer and activator of transcription 1                    | 3.80 | 4.61 | 0.00 |
| A_51_P212977  | NM_133954 | AA960436 | 101985 | expressed sequence AA960436                                           | 4.95 | 4.60 | 0.00 |
| A_51_P431531  | NM_001013 | E2f8     | 108961 | E2F transcription factor 8                                            | 3.56 | 4.60 | 0.00 |
| A_52_P308875  | AK049998  | Apobec3  | 80287  | apolipoprotein B mRNA editing enzyme, catalytic polypeptide 3         | 3.73 | 4.60 | 0.00 |
| A_52_P553299  | AK040647  | Pcgf5    | 76073  | polycomb group ring finger 5                                          | 4.05 | 4.59 | 0.00 |
| A_52_P420216  | BC004022  | N4bp1    | 80750  | NEDD4 binding protein 1                                               | 3.71 | 4.59 | 0.00 |
| A_51_P111492  | NM_017373 | Nfil3    | 18030  | nuclear factor, interleukin 3, regulated                              | 4.39 | 4.59 | 0.00 |
| A_51_P473633  | AK035191  | Tead1    | 21676  | TEA domain family member 1                                            | 5.43 | 4.59 | 0.00 |
| A_51_P470715  | NM_009895 | Cish     | 12700  | cytokine inducible SH2-containing protein                             | 3.05 | 4.59 | 0.00 |
| A_51_P381427  | NM_009529 | Gm4836   | 22526  | predicted gene 4836                                                   | 4.59 | 4.58 | 0.00 |
| A_51_P496751  | NM_018868 | Nop58    | 55989  | NOP58 ribonucleoprotein homolog (yeast)                               | 3.90 | 4.58 | 0.00 |

|              |           |          |        |                                                                                       |      |      |      |
|--------------|-----------|----------|--------|---------------------------------------------------------------------------------------|------|------|------|
| A_52_P278853 | NM_030684 | Trim34   | 94094  | tripartite motif-containing 34                                                        | 2.62 | 4.58 | 0.00 |
| A_52_P417890 | NM_010555 | Il1r2    | 16178  | interleukin 1 receptor, type II                                                       | 4.35 | 4.57 | 0.00 |
| A_52_P562612 | AK082819  | Srd5a1   | 78925  | steroid 5 alpha-reductase 1                                                           | 1.96 | 4.56 | 0.04 |
| A_52_P15461  | NM_008357 | Il15     | 16168  | interleukin 15                                                                        | 3.80 | 4.55 | 0.00 |
| A_52_P925197 | NM_007570 | Btg2     | 12227  | B-cell translocation gene 2, anti-proliferative                                       | 3.34 | 4.55 | 0.00 |
| A_52_P21837  | AK030944  | Ankrd57  | 268301 | ankyrin repeat domain 57                                                              | 4.36 | 4.55 | 0.00 |
| A_51_P324110 | NM_144808 | Slc39a14 | 213053 | solute carrier family 39 (zinc transporter), member 14                                | 3.58 | 4.55 | 0.00 |
| A_51_P351481 | NM_019937 | Ccnl1    | 56706  | cyclin L1                                                                             | 4.18 | 4.54 | 0.00 |
| A_51_P235123 | NM_008690 | Nfkbia   | 18037  | nuclear factor of kappa light polypeptide gene enhancer in B-cells inhibitor, epsilon | 3.50 | 4.54 | 0.00 |
| A_52_P331911 | NM_010120 | Eif1a    | 13664  | eukaryotic translation initiation factor 1A                                           | 3.72 | 4.54 | 0.00 |
| A_51_P444954 | NM_172953 | Serpina5 | 268591 | serine (or cysteine) peptidase inhibitor, clade A, member 5                           | 4.38 | 4.53 | 0.00 |
| A_51_P488888 | NM_013632 | Pnp1     | 18950  | purine-nucleoside phosphorylase 1                                                     | 5.14 | 4.53 | 0.00 |
| A_51_P289912 | XM_203999 | Rapgef2  | 76089  | Rap guanine nucleotide exchange factor (GEF) 2                                        | 4.32 | 4.51 | 0.00 |
| A_52_P216600 | NM_013514 | Epb4.9   | 13829  | erythrocyte protein band 4.9                                                          | 2.59 | 4.51 | 0.00 |
| A_52_P479001 | NM_172689 | Ddx58    | 230073 | DEAD (Asp-Glu-Ala-Asp) box polypeptide 58                                             | 3.71 | 4.50 | 0.00 |
| A_52_P247900 | U42467    | Lepr     | 16847  | leptin receptor                                                                       | 4.11 | 4.50 | 0.00 |
| A_52_P618852 | AK139584  | Eif1a    | 13664  | eukaryotic translation initiation factor 1A                                           | 3.74 | 4.49 | 0.00 |
| A_51_P418884 | BC020078  | Xdh      | 22436  | xanthine dehydrogenase                                                                | 2.74 | 4.49 | 0.00 |
| A_52_P516021 | BF165830  | Ptpn1    | 19246  | protein tyrosine phosphatase, non-receptor type 1                                     | 5.17 | 4.49 | 0.00 |
| A_51_P398491 | NM_021406 | Trem1    | 58217  | triggering receptor expressed on myeloid cells 1                                      | 4.10 | 4.49 | 0.00 |
| A_51_P268843 | NM_028544 | Rasip1   | 69903  | Ras interacting protein 1                                                             | 4.92 | 4.49 | 0.00 |
| A_52_P527741 | NM_177371 | Tnfsf15  | 326623 | tumor necrosis factor (ligand) superfamily, member 15                                 | 4.62 | 4.49 | 0.00 |
| A_51_P515883 | NM_139198 | Plac8    | 231507 | placenta-specific 8                                                                   | 3.96 | 4.47 | 0.00 |
| A_52_P570266 | NM_013640 | Psmb10   | 19171  | proteasome (prosome, macropain) subunit, beta type 10                                 | 4.63 | 4.45 | 0.00 |
| A_52_P197095 | BC064815  | Cdk17    | 237459 | cyclin-dependent kinase 17                                                            | 3.33 | 4.45 | 0.00 |
| A_51_P352968 | NM_008538 | Marcks   | 17118  | myristoylated alanine rich protein kinase C substrate                                 | 4.58 | 4.45 | 0.00 |

|              |           |             |        |                                                                                     |      |      |      |
|--------------|-----------|-------------|--------|-------------------------------------------------------------------------------------|------|------|------|
| A_51_P283759 | M57999    | Nfkb1       | 18033  | nuclear factor of kappa light polypeptide gene enhancer in B-cells 1, p105          | 5.40 | 4.44 | 0.00 |
| A_51_P181517 | NM_144559 | Fcgr4       | 246256 | Fc receptor, IgG, low affinity IV                                                   | 3.52 | 4.44 | 0.00 |
| A_52_P560113 | NM_008199 | H2-BI       | 14963  | histocompatibility 2, blastocyst                                                    | 2.85 | 4.43 | 0.00 |
| A_51_P276993 | NM_030720 | Gpr84       | 80910  | G protein-coupled receptor 84                                                       | 4.55 | 4.42 | 0.00 |
| A_52_P202895 | NM_001005 | Mtus1       | 102103 | mitochondrial tumor suppressor 1                                                    | 3.74 | 4.42 | 0.00 |
| A_51_P371190 | NM_013917 | Pttg1       | 30939  | pituitary tumor-transforming gene 1                                                 | 1.91 | 4.41 | 0.06 |
| A_51_P211732 | NM_008977 | Ptpn2       | 19255  | protein tyrosine phosphatase, non-receptor type 2                                   | 4.13 | 4.41 | 0.00 |
| A_52_P444628 | NM_007807 | Cybb        | 13058  | cytochrome b-245, beta polypeptide                                                  | 4.13 | 4.41 | 0.00 |
| A_51_P417074 | NM_028455 | Arhgap8     | 73167  | Rho GTPase activating protein 8                                                     | 4.11 | 4.38 | 0.00 |
| A_52_P339996 | NM_009320 | Slc6a6      | 21366  | solute carrier family 6 (neurotransmitter transporter, taurine), member 6           | 4.79 | 4.37 | 0.00 |
| A_51_P225761 | AK031537  | Zcchc6      | 214290 | zinc finger, CCHC domain containing 6                                               | 4.69 | 4.37 | 0.00 |
| A_51_P180423 | NM_009921 | Camp        | 12796  | cathelicidin antimicrobial peptide                                                  | 3.86 | 4.37 | 0.00 |
| A_51_P193146 | NM_028595 | Ms4a6c      | 73656  | membrane-spanning 4-domains, subfamily A, member 6C                                 | 4.04 | 4.36 | 0.00 |
| A_52_P76216  | NM_001033 | Fam59a      | 381126 | family with sequence similarity 59, member A                                        | 4.50 | 4.35 | 0.00 |
| A_52_P652094 | NM_022028 | Sav1        | 64010  | salvador homolog 1 (Drosophila)                                                     | 5.03 | 4.35 | 0.00 |
| A_52_P535195 | AK139506  | Gbbp1l1     | 77110  | GC-rich promoter binding protein 1-like 1                                           | 4.23 | 4.34 | 0.00 |
| A_51_P233160 | NM_027309 | Lysmd2      | 70082  | LysM, putative peptidoglycan-binding, domain containing 2                           | 3.74 | 4.34 | 0.00 |
| A_52_P585652 | NM_173182 | Fndc3b      | 72007  | fibronectin type III domain containing 3B                                           | 2.86 | 4.34 | 0.00 |
| A_51_P146103 | NM_008390 | Irf1        | 16362  | interferon regulatory factor 1                                                      | 3.62 | 4.33 | 0.00 |
| A_51_P282799 | NM_008884 | Pml         | 18854  | promyelocytic leukemia                                                              | 4.88 | 4.33 | 0.00 |
| A_52_P47232  | NM_016736 | Nub1        | 53312  | negative regulator of ubiquitin-like proteins 1                                     | 5.27 | 4.32 | 0.00 |
| A_51_P512340 | NM_019840 | Pde4b       | 18578  | phosphodiesterase 4B, cAMP specific                                                 | 3.70 | 4.32 | 0.00 |
| A_51_P388737 | NM_008732 | Slc11a2     | 18174  | solute carrier family 11 (proton-coupled divalent metal ion transporters), member 2 | 3.59 | 4.31 | 0.00 |
| A_52_P282430 | AK033828  | D16Ertd47.6 | 102671 | DNA segment, Chr 16, ERATO Doi 472, expressed                                       | 4.15 | 4.29 | 0.00 |
| A_51_P387608 | NM_010431 | Hif1a       | 15251  | hypoxia inducible factor 1, alpha subunit                                           | 3.33 | 4.29 | 0.00 |
| A_51_P352875 | NM_010696 | Lcp2        | 16822  | lymphocyte cytosolic protein 2                                                      | 3.30 | 4.29 | 0.00 |
| A_52_P480402 | AK147365  | Avl9        | 78937  | AVL9 homolog (S. cerevisiae)                                                        | 3.80 | 4.29 | 0.00 |
| A_52_P642239 | NM_031376 | Pik3ap1     | 83490  | phosphoinositide-3-kinase adaptor protein 1                                         | 3.61 | 4.29 | 0.00 |



|              |           |                |                                                         |                                                       |      |      |      |
|--------------|-----------|----------------|---------------------------------------------------------|-------------------------------------------------------|------|------|------|
| A_52_P359071 | AK042039  | 4930599N275379 | RIKEN cDNA 4930599N23 gene                              | 3.93                                                  | 4.27 | 0.00 |      |
|              |           |                | solute carrier organic anion transporter family, member |                                                       |      |      |      |
| A_51_P194415 | NM_023908 | Slco3a1        | 108116                                                  | 3a1                                                   | 3.80 | 4.27 | 0.00 |
| A_52_P374897 | NM_009705 | Arg2           | 11847                                                   | arginase type II                                      | 4.01 | 4.27 | 0.00 |
| A_52_P545608 | XM_619777 | NA             | NA                                                      | NA                                                    | 4.29 | 4.27 | 0.00 |
| A_52_P119510 | NM_008384 | Inpp1          | 16329                                                   | inositol polyphosphate-1-phosphatase                  | 4.17 | 4.26 | 0.00 |
| A_52_P309012 | AK033502  | Chmp4c         | 66371                                                   | chromatin modifying protein 4C                        | 4.43 | 4.26 | 0.00 |
| A_52_P516296 | NM_145226 | Oas3           | 246727                                                  | 2'-5' oligoadenylate synthetase 3                     | 2.87 | 4.23 | 0.00 |
| A_51_P176954 | NM_008575 | Mdm4           | 17248                                                   | transformed mouse 3T3 cell double minute 4            | 3.96 | 4.23 | 0.00 |
| A_52_P591431 | NM_198102 | Tra2a          | 101214                                                  | transformer 2 alpha homolog (Drosophila)              | 3.17 | 4.23 | 0.00 |
| A_51_P381558 | NM_133914 | Rasa4          | 54153                                                   | RAS p21 protein activator 4                           | 3.95 | 4.22 | 0.00 |
| A_52_P157705 | AK019108  | 2210404J1      | 381062                                                  | RIKEN cDNA 2210404J11 gene                            | 3.04 | 4.21 | 0.00 |
| A_52_P121087 | NM_008884 | Pml            | 18854                                                   | promyelocytic leukemia                                | 5.02 | 4.20 | 0.00 |
| A_51_P494597 | AK137465  | BC013712       | 230787                                                  | cDNA sequence BC013712                                | 3.96 | 4.20 | 0.00 |
| A_52_P229536 | NM_009851 | Cd44           | 12505                                                   | CD44 antigen                                          | 3.84 | 4.19 | 0.00 |
|              |           |                | Ras association (RalGDS/AF-6) and pleckstrin homology   |                                                       |      |      |      |
| A_52_P551476 | NM_001045 | Raph1          | 77300                                                   | domains 1                                             | 2.94 | 4.18 | 0.00 |
|              |           |                | nuclear factor of kappa light polypeptide gene enhancer |                                                       |      |      |      |
| A_51_P295192 | NM_010907 | Nfkbia         | 18035                                                   | in B-cells inhibitor, alpha                           | 5.49 | 4.18 | 0.00 |
| A_51_P254906 | NM_178682 | 4933426M       | 217684                                                  | RIKEN cDNA 4933426M11 gene                            | 5.73 | 4.18 | 0.00 |
| A_51_P115749 | NM_029749 | Usp42          | 76800                                                   | ubiquitin specific peptidase 42                       | 3.44 | 4.18 | 0.00 |
| A_52_P158923 | NM_013594 | Mbd1           | 17190                                                   | methyl-CpG binding domain protein 1                   | 2.37 | 4.17 | 0.01 |
| A_51_P244453 | NM_172650 | Kctd3          | 226823                                                  | potassium channel tetramerisation domain containing 3 | 3.25 | 4.16 | 0.00 |
| A_51_P286665 | NM_011249 | Rbl1           | 19650                                                   | retinoblastoma-like 1 (p107)                          | 3.08 | 4.14 | 0.00 |
| A_51_P440238 | NM_027819 | Ggt6           | 71522                                                   | gamma-glutamyltransferase 6                           | 3.99 | 4.14 | 0.00 |
| A_51_P161946 | NM_175332 | E130012A1      | 103551                                                  | RIKEN cDNA E130012A19 gene                            | 4.91 | 4.14 | 0.00 |
| A_52_P16657  | BC031488  | Tmem87b        | 72477                                                   | transmembrane protein 87B                             | 3.89 | 4.14 | 0.00 |
| A_51_P407351 | NM_013825 | Ly75           | 17076                                                   | lymphocyte antigen 75                                 | 3.93 | 4.13 | 0.00 |
| A_51_P247114 | NM_008199 | H2-BI          | 14963                                                   | histocompatibility 2, blastocyst                      | 2.75 | 4.11 | 0.00 |
| A_52_P148861 | NM_009743 | Bcl2l1         | 12048                                                   | BCL2-like 1                                           | 3.78 | 4.11 | 0.00 |
| A_52_P425092 | NA        | NA             | NA                                                      | NA                                                    | 3.62 | 4.11 | 0.00 |
| A_52_P4482   | NA        | NA             | NA                                                      | NA                                                    | 2.90 | 4.10 | 0.00 |

|               |           |          |        |                                                                                                           |      |      |      |
|---------------|-----------|----------|--------|-----------------------------------------------------------------------------------------------------------|------|------|------|
| A_52_P489295  | NM_009621 | Adamts1  | 11504  | a disintegrin-like and metallopeptidase (reprolysin type) with thrombospondin type 1 motif, 1             | 5.23 | 4.10 | 0.00 |
| A_52_P665675  | NM_013454 | Abca1    | 11303  | ATP-binding cassette, sub-family A (ABC1), member 1 transmembrane and tetratricopeptide repeat containing | 4.62 | 4.09 | 0.00 |
| A_51_P288916  | NM_177368 | Tmtc2    | 278279 | 2                                                                                                         | 4.43 | 4.09 | 0.00 |
| A_51_P409260  | NM_008539 | Smad1    | 17125  | MAD homolog 1 (Drosophila)                                                                                | 3.34 | 4.09 | 0.00 |
| A_51_P237856  | NM_001045 | Ifi203   | 15950  | interferon activated gene 203                                                                             | 4.88 | 4.09 | 0.00 |
| A_52_P110877  | NM_011853 | NA       | NA     | NA                                                                                                        | 3.03 | 4.08 | 0.00 |
| A_52_P382107  | BI692008  | Nlrc5    | 434341 | NLR family, CARD domain containing 5                                                                      | 3.77 | 4.06 | 0.00 |
| A_52_P117393  | NM_011604 | Tlr6     | 21899  | toll-like receptor 6                                                                                      | 3.33 | 4.06 | 0.00 |
| A_51_P481238  | NM_027293 | Dopey2   | 70028  | dopey family member 2                                                                                     | 3.38 | 4.06 | 0.00 |
| A_52_P288270  | XR_003114 | NA       | NA     | NA                                                                                                        | 3.50 | 4.05 | 0.00 |
| A_52_P314741  | NM_177198 | NA       | NA     | NA                                                                                                        | 3.71 | 4.04 | 0.00 |
| A_51_P464791  | NM_001042 | Gpcpd1   | 74182  | glycerophosphocholine phosphodiesterase GDE1 homolog ( <i>S. cerevisiae</i> )                             | 3.23 | 4.04 | 0.00 |
| A_51_P243695  | NM_153538 | Zcchc6   | 214290 | zinc finger, CCHC domain containing 6                                                                     | 3.99 | 4.03 | 0.00 |
| A_52_P1050539 | XM_987115 | NA       | NA     | NA                                                                                                        | 3.71 | 4.03 | 0.00 |
| A_51_P452227  | NM_181402 | Parp11   | 101187 | poly (ADP-ribose) polymerase family, member 11                                                            | 1.81 | 4.03 | 0.11 |
| A_51_P375680  | XM_129214 | Pcsk5    | 18552  | proprotein convertase subtilisin/kexin type 5                                                             | 3.94 | 4.02 | 0.00 |
| A_51_P487791  | NM_007420 | Adrb2    | 11555  | adrenergic receptor, beta 2                                                                               | 3.76 | 4.02 | 0.00 |
| A_51_P447668  | NM_011203 | Ptpn12   | 19248  | protein tyrosine phosphatase, non-receptor type 12                                                        | 2.53 | 4.02 | 0.00 |
| A_51_P124254  | NM_009931 | Col4a1   | 12826  | collagen, type IV, alpha 1                                                                                | 3.41 | 4.01 | 0.00 |
| A_51_P167292  | NM_009892 | Chi3l3   | 12655  | chitinase 3-like 3                                                                                        | 2.52 | 4.01 | 0.00 |
| A_52_P2540    | NM_001013 | Gm5662   | 435337 | predicted gene 5662                                                                                       | 3.25 | 4.01 | 0.00 |
| A_52_P184149  | NM_008638 | Mthfd2   | 17768  | methylenetetrahydrofolate dehydrogenase (NAD+ dependent), methenyltetrahydrofolate cyclohydrolase         | 3.76 | 4.01 | 0.00 |
| A_52_P402907  | NM_027444 | Bbx      | 70508  | bobby sox homolog ( <i>Drosophila</i> )                                                                   | 3.17 | 4.01 | 0.00 |
| A_52_P523459  | NM_009851 | Cd44     | 12505  | CD44 antigen                                                                                              | 3.73 | 4.01 | 0.00 |
| A_52_P545604  | AK081682  | Tnks1bp1 | 228140 | tankyrase 1 binding protein 1                                                                             | 3.43 | 4.01 | 0.00 |

|               |            |           |        |                                                                                                                            |      |      |      |
|---------------|------------|-----------|--------|----------------------------------------------------------------------------------------------------------------------------|------|------|------|
| A_52_P321358  | BC052532   | BC006779  | 229003 | cDNA sequence BC006779                                                                                                     | 3.20 | 4.01 | 0.00 |
| A_52_P1115511 | AK031392   | 6030422H2 | 402765 | RIKEN cDNA 6030422H21 gene                                                                                                 | 2.71 | 4.00 | 0.00 |
| A_52_P175685  | NM_008390  | Irf1      | 16362  | interferon regulatory factor 1                                                                                             | 2.74 | 4.00 | 0.00 |
| A_51_P495181  | AK044091   | Gm3457    | 1E+08  | predicted gene 3457                                                                                                        | 3.33 | 4.00 | 0.00 |
| A_51_P124886  | NM_144791  | Tor1aip1  | 208263 | torsin A interacting protein 1                                                                                             | 3.93 | 4.00 | 0.00 |
| A_51_P330369  | NM_138744  | Ssx2ip    | 99167  | synovial sarcoma, X breakpoint 2 interacting protein<br>MIT, microtubule interacting and transport, domain<br>containing 1 | 3.60 | 3.99 | 0.00 |
| A_52_P203833  | NM_026913  | Mitd1     | 69028  |                                                                                                                            | 4.05 | 3.99 | 0.00 |
| A_51_P482051  | NM_007820  | Cyp3a16   | 13114  | cytochrome P450, family 3, subfamily a, polypeptide 16                                                                     | 3.38 | 3.99 | 0.00 |
| A_52_P153302  | NM_027238  | Ttc39b    | 69863  | tetratricopeptide repeat domain 39B                                                                                        | 3.98 | 3.99 | 0.00 |
| A_51_P212854  | NM_009546  | Trim25    | 217069 | tripartite motif-containing 25                                                                                             | 3.65 | 3.99 | 0.00 |
| A_51_P440460  | NM_145070  | Hip1r     | 29816  | huntingtin interacting protein 1 related                                                                                   | 4.11 | 3.98 | 0.00 |
| A_51_P376050  | NM_029495  | Epsti1    | 108670 | epithelial stromal interaction 1 (breast)<br>glycerophosphocholine phosphodiesterase GDE1                                  | 3.24 | 3.98 | 0.00 |
| A_52_P384069  | NM_001042i | Gpcpd1    | 74182  | homolog ( <i>S. cerevisiae</i> )                                                                                           | 2.48 | 3.97 | 0.00 |
| A_51_P316816  | NM_023738  | Uba7      | 74153  | ubiquitin-like modifier activating enzyme 7                                                                                | 3.40 | 3.95 | 0.00 |
| A_51_P276479  | NM_178098  | 4930486L2 | 214639 | RIKEN cDNA 4930486L24 gene                                                                                                 | 3.36 | 3.95 | 0.00 |
| A_52_P481493  | NM_010220  | Fkbp5     | 14229  | FK506 binding protein 5                                                                                                    | 3.01 | 3.94 | 0.00 |
| A_51_P197209  | NM_133770  | Adck4     | 76889  | aarF domain containing kinase 4                                                                                            | 3.63 | 3.94 | 0.00 |
| A_52_P243102  | NM_172650  | Kctd3     | 226823 | potassium channel tetramerisation domain containing 3                                                                      | 3.74 | 3.94 | 0.00 |
| A_52_P283656  | NM_175730  | Hoxc5     | 15424  | homeobox C5                                                                                                                | 1.50 | 3.94 | 0.44 |
| A_51_P181565  | NM_010415  | Hbegf     | 15200  | heparin-binding EGF-like growth factor                                                                                     | 4.14 | 3.94 | 0.00 |
| A_51_P174723  | NM_019388  | Cd86      | 12524  | CD86 antigen<br>glycerophosphocholine phosphodiesterase GDE1                                                               | 3.95 | 3.93 | 0.00 |
| A_52_P470017  | NM_001042i | Gpcpd1    | 74182  | homolog ( <i>S. cerevisiae</i> )                                                                                           | 3.41 | 3.93 | 0.00 |
| A_52_P468068  | XM_001000  | Tchh      | 99681  | trichohyalin                                                                                                               | 3.61 | 3.93 | 0.00 |
| A_52_P571006  | NM_177380  | Cyp3a44   | 337924 | cytochrome P450, family 3, subfamily a, polypeptide 44                                                                     | 2.96 | 3.93 | 0.00 |
| A_51_P406604  | BC052532   | BC006779  | 229003 | cDNA sequence BC006779<br>ladybird homeobox 1 homolog ( <i>Drosophila</i> ) corepressor                                    | 4.38 | 3.92 | 0.00 |
| A_51_P242643  | NM_172446  | Lbxcor1   | 207667 | 1                                                                                                                          | 2.38 | 3.92 | 0.01 |

|              |           |                 |        |                                                                                                                                  |      |      |      |
|--------------|-----------|-----------------|--------|----------------------------------------------------------------------------------------------------------------------------------|------|------|------|
| A_51_P187842 | NM_025829 | Eif4e3          | 66892  | eukaryotic translation initiation factor 4E member 3<br>tetratricopeptide repeat, ankyrin repeat and coiled-coil<br>containing 1 | 2.26 | 3.92 | 0.01 |
| A_52_P261322 | NM_198294 | Tanc1           | 66860  | MIT, microtubule interacting and transport, domain<br>containing 1                                                               | 5.02 | 3.91 | 0.00 |
| A_52_P203837 | NM_026913 | Mitd1           | 69028  | v-maf musculoaponeurotic fibrosarcoma oncogene<br>family, protein K (avian)                                                      | 4.11 | 3.91 | 0.00 |
| A_51_P306183 | NM_010757 | Mafk            | 17135  | polyhomeotic-like 2 (Drosophila)                                                                                                 | 4.08 | 3.91 | 0.00 |
| A_51_P457388 | NM_018774 | Phc2            | 54383  | angiopoietin 2                                                                                                                   | 3.44 | 3.91 | 0.00 |
| A_51_P201982 | NM_007426 | Angpt2          | 11601  | serum/glucocorticoid regulated kinase 1                                                                                          | 3.99 | 3.91 | 0.00 |
| A_51_P118237 | NM_011361 | Sgk1            | 20393  | ELMO domain containing 2                                                                                                         | 2.76 | 3.91 | 0.00 |
| A_51_P184806 | NM_178736 | Elmod2          | 244548 | proteasome (prosome, macropain) subunit, beta type 8<br>(large multifunctional peptidase 7)                                      | 3.72 | 3.90 | 0.00 |
| A_51_P345367 | NM_010724 | Psmb8           | 16913  | hypothetical protein 9530028C05                                                                                                  | 3.81 | 3.90 | 0.00 |
| A_51_P249471 | AK035387  | 9530028C0330256 |        | RIKEN cDNA 9030607L17 gene                                                                                                       | 2.37 | 3.89 | 0.01 |
| A_51_P425279 | AK018541  | 9030607L171564  |        | formyl peptide receptor 1                                                                                                        | 1.39 | 3.88 | 0.67 |
| A_51_P312485 | NM_013521 | Fpr1            | 14293  | interleukin 15 receptor, alpha chain                                                                                             | 3.43 | 3.88 | 0.00 |
| A_52_P55902  | NM_008358 | Il15ra          | 16169  | ring finger protein 31                                                                                                           | 4.35 | 3.88 | 0.00 |
| A_52_P514982 | NM_194346 | Rnf31           | 268749 | ribosomal protein S6 kinase polypeptide 3                                                                                        | 4.76 | 3.88 | 0.00 |
| A_52_P283628 | NM_148945 | Rps6ka3         | 110651 | signal transducer and activator of transcription 1                                                                               | 3.83 | 3.88 | 0.00 |
| A_52_P505218 | NM_009283 | Stat1           | 20846  | RIKEN cDNA 1110018G07 gene                                                                                                       | 3.89 | 3.88 | 0.00 |
| A_52_P584802 | NM_178065 | 1110018G068497  |        | NA                                                                                                                               | 3.99 | 3.88 | 0.00 |
| A_52_P471482 | AK033940  | NA              | NA     | transmembrane protein 56                                                                                                         | 4.37 | 3.87 | 0.00 |
| A_51_P329243 | NM_178936 | Tmem56          | 99887  | family with sequence similarity 46, member A                                                                                     | 4.36 | 3.87 | 0.00 |
| A_51_P272876 | XM_135029 | Fam46a          | 212943 | phospholipid scramblase 2                                                                                                        | 3.55 | 3.87 | 0.00 |
| A_52_P372901 | NM_008880 | Plscr2          | 18828  | sema domain, transmembrane domain (TM), and<br>cytoplasmic domain, (semaphorin) 6B                                               | 3.35 | 3.87 | 0.00 |
| A_51_P417952 | NM_013662 | Sema6b          | 20359  | ubiquitin specific peptidase 25                                                                                                  | 3.27 | 3.87 | 0.00 |
| A_51_P176377 | NM_013918 | Usp25           | 30940  | MAD homolog 1 (Drosophila)                                                                                                       | 3.46 | 3.87 | 0.00 |
| A_52_P65108  | NM_008539 | Smad1           | 17125  | mitogen-activated protein kinase kinase kinase kinase 4                                                                          | 4.95 | 3.86 | 0.00 |
| A_51_P268053 | NM_008696 | Map4k4          | 26921  | Sfi1 homolog, spindle assembly associated (yeast)                                                                                | 4.10 | 3.86 | 0.00 |
| A_51_P510485 | BC046305  | Sfi1            | 78887  |                                                                                                                                  | 3.90 | 3.86 | 0.00 |

|              |           |            |        |                                                                           |      |      |      |
|--------------|-----------|------------|--------|---------------------------------------------------------------------------|------|------|------|
| A_51_P240614 | NM_008536 | Tm4sf1     | 17112  | transmembrane 4 superfamily member 1                                      | 3.98 | 3.86 | 0.00 |
| A_51_P408116 | AK081783  | Il1f9      | 215257 | interleukin 1 family, member 9                                            | 3.11 | 3.85 | 0.00 |
| A_51_P387239 | NM_021792 | ligp1      | 60440  | interferon inducible GTPase 1                                             | 3.76 | 3.84 | 0.00 |
| A_51_P263965 | NM_010442 | Hmox1      | 15368  | heme oxygenase (decycling) 1                                              | 3.63 | 3.84 | 0.00 |
| A_51_P272563 | NM_172722 | Naa25      | 231713 | N(alpha)-acetyltransferase 25, NatB auxiliary subunit                     | 3.97 | 3.84 | 0.00 |
| A_52_P459046 | AK164568  | Slc38a2    | 67760  | solute carrier family 38, member 2                                        | 3.26 | 3.84 | 0.00 |
| A_51_P368696 | NM_001042 | Apaf1      | 11783  | apoptotic peptidase activating factor 1                                   | 3.92 | 3.84 | 0.00 |
| A_52_P87843  | NM_053080 | Aldh1a3    | 56847  | aldehyde dehydrogenase family 1, subfamily A3                             | 2.93 | 3.83 | 0.00 |
| A_52_P237159 | NA        | NA         | NA     | NA                                                                        | 3.63 | 3.83 | 0.00 |
| A_51_P501218 | AK154817  | 3110043O2  | 73205  | RIKEN cDNA 3110043O21 gene                                                | 2.40 | 3.82 | 0.01 |
| A_52_P184304 | NM_134448 | Dst        | 13518  | dystonin                                                                  | 3.33 | 3.81 | 0.00 |
| A_51_P221291 | NM_009229 | Sntb2      | 20650  | syntrophin, basic 2                                                       | 3.94 | 3.79 | 0.00 |
| A_52_P601829 | AK035485  | NA         | NA     | NA                                                                        | 3.35 | 3.79 | 0.00 |
| A_52_P63553  | NM_009883 | Cebpb      | 12608  | CCAAT/enhancer binding protein (C/EBP), beta                              | 3.68 | 3.78 | 0.00 |
| A_51_P513163 | NM_198102 | Tra2a      | 101214 | transformer 2 alpha homolog (Drosophila)                                  | 3.07 | 3.78 | 0.00 |
| A_51_P496187 | NM_172690 | N28178     | 230085 | expressed sequence N28178                                                 | 1.42 | 3.78 | 0.58 |
| A_52_P42834  | NM_013918 | Usp25      | 30940  | ubiquitin specific peptidase 25                                           | 2.66 | 3.78 | 0.00 |
| A_51_P483013 | NM_178065 | 1110018G0  | 68497  | RIKEN cDNA 1110018G07 gene                                                | 3.93 | 3.78 | 0.00 |
| A_51_P431433 | NM_031997 | Tmem2      | 83921  | transmembrane protein 2                                                   | 4.89 | 3.77 | 0.00 |
| A_51_P244820 | NM_201373 | Trim56     | 384309 | tripartite motif-containing 56                                            | 3.18 | 3.77 | 0.00 |
| A_51_P255016 | XM_976918 | NA         | NA     | NA                                                                        | 3.05 | 3.76 | 0.00 |
| A_52_P496503 | NM_009283 | Stat1      | 20846  | signal transducer and activator of transcription 1                        | 3.07 | 3.76 | 0.00 |
| A_51_P505795 | NM_145391 | Tapbpl     | 213233 | TAP binding protein-like                                                  | 4.39 | 3.75 | 0.00 |
| A_51_P201480 | NM_213659 | Stat3      | 20848  | signal transducer and activator of transcription 3                        | 3.54 | 3.75 | 0.00 |
| A_52_P622941 | AK034948  | Slc25a37   | 67712  | solute carrier family 25, member 37                                       | 1.96 | 3.75 | 0.04 |
| A_51_P355301 | NM_007818 | Cyp3a11    | 13112  | cytochrome P450, family 3, subfamily a, polypeptide 11                    | 2.60 | 3.74 | 0.00 |
| A_52_P574291 | AK015681  | Chic2      | 74277  | cysteine-rich hydrophobic domain 2                                        | 3.42 | 3.73 | 0.00 |
| A_51_P394190 | NM_010723 | Lmo4       | 16911  | LIM domain only 4                                                         | 4.07 | 3.73 | 0.00 |
| A_52_P677262 | BC031891  | Serpina4-p | 321018 | serine (or cysteine) peptidase inhibitor, clade A, member 4, pseudogene 1 | 2.95 | 3.73 | 0.00 |
| A_51_P159194 | NM_008416 | Junb       | 16477  | Jun-B oncogene                                                            | 3.41 | 3.72 | 0.00 |
| A_51_P219532 | AK003388  | 1110003O0  | 76291  | RIKEN cDNA 1110003O08 gene                                                | 3.50 | 3.72 | 0.00 |

|               |           |           |        |                                                                                                            |      |      |      |
|---------------|-----------|-----------|--------|------------------------------------------------------------------------------------------------------------|------|------|------|
| A_51_P413348  | NM_009510 | Ezr       | 22350  | ezrin                                                                                                      | 2.71 | 3.71 | 0.00 |
| A_52_P643851  | NR_001277 | Snord33   | 27208  | small nucleolar RNA, C/D box 33                                                                            | 2.31 | 3.71 | 0.01 |
| A_52_P250644  | NA        | NA        | NA     | NA                                                                                                         | 4.42 | 3.70 | 0.00 |
| A_51_P418375  | NM_023844 | Jam2      | 67374  | junction adhesion molecule 2                                                                               | 3.26 | 3.70 | 0.00 |
| A_51_P234113  | NM_172729 | Nod1      | 107607 | nucleotide-binding oligomerization domain containing 1<br>membrane-spanning 4-domains, subfamily A, member | 2.70 | 3.69 | 0.00 |
| A_51_P294505  | NM_025658 | Ms4a4d    | 66607  | 4D                                                                                                         | 3.70 | 3.69 | 0.00 |
| A_51_P105554  | NM_007768 | Crp       | 12944  | C-reactive protein, pentraxin-related                                                                      | 2.49 | 3.69 | 0.00 |
| A_51_P191469  | NM_194346 | Rnf31     | 268749 | ring finger protein 31<br>Cbp/p300-interacting transactivator, with Glu/Asp-rich                           | 4.28 | 3.68 | 0.00 |
| A_51_P478556  | NM_010828 | Cited2    | 17684  | carboxy-terminal domain, 2                                                                                 | 3.12 | 3.68 | 0.00 |
| A_52_P261262  | NM_144539 | Slamf7    | 75345  | SLAM family member 7<br>amyloid beta (A4) precursor protein-binding, family B,                             | 2.50 | 3.68 | 0.00 |
| A_51_P277321  | NM_146085 | Apbb3     | 225372 | member 3                                                                                                   | 3.01 | 3.68 | 0.00 |
| A_52_P403020  | NM_011916 | Xrn1      | 24127  | 5'-3' exoribonuclease 1                                                                                    | 3.14 | 3.68 | 0.00 |
| A_51_P423976  | NM_013498 | Crem      | 12916  | cAMP responsive element modulator                                                                          | 3.29 | 3.67 | 0.00 |
| A_52_P220810  | NM_144551 | Trib2     | 217410 | tribbles homolog 2 (Drosophila)                                                                            | 4.43 | 3.66 | 0.00 |
| A_52_P490272  | NM_022979 | Nup98     | 269966 | nucleoporin 98                                                                                             | 3.42 | 3.66 | 0.00 |
| A_52_P318673  | NM_009117 | Saa1      | 20208  | serum amyloid A 1                                                                                          | 2.22 | 3.66 | 0.01 |
| A_52_P218440  | NM_178098 | 4930486L2 | 214639 | RIKEN cDNA 4930486L24 gene                                                                                 | 3.36 | 3.65 | 0.00 |
| A_51_P111936  | NM_022329 | Tor1aip2  | 240832 | torsin A interacting protein 2                                                                             | 4.25 | 3.64 | 0.00 |
| A_52_P36261   | NA        | NA        | NA     | NA                                                                                                         | 2.78 | 3.63 | 0.00 |
| A_51_P311958  | NM_013623 | Orm3      | 18407  | orosomuroid 3                                                                                              | 1.99 | 3.61 | 0.04 |
| A_52_P159276  | NM_145890 | Grhl1     | 195733 | grainyhead-like 1 (Drosophila)                                                                             | 3.72 | 3.61 | 0.00 |
| A_51_P277884  | NM_010120 | Eif1a     | 13664  | eukaryotic translation initiation factor 1A<br>UDP-Gal:betaGlcNAc beta 1,4- galactosyltransferase,         | 3.98 | 3.61 | 0.00 |
| A_52_P103391  | NM_022305 | B4galt1   | 14595  | polypeptide 1<br>proteasome (prosome, macropain) subunit, beta type 8                                      | 4.05 | 3.61 | 0.00 |
| A_51_P345366  | NM_010724 | Psmb8     | 16913  | (large multifunctional peptidase 7)                                                                        | 3.54 | 3.59 | 0.00 |
| A_51_P427530  | NM_025700 | Pgm1      | 66681  | phosphoglucomutase 1                                                                                       | 2.64 | 3.59 | 0.00 |
| A_52_P1116491 | AK086916  | Tor1aip1  | 208263 | torsin A interacting protein 1                                                                             | 4.01 | 3.59 | 0.00 |
| A_52_P578562  | NM_173865 | Slc41a1   | 98396  | solute carrier family 41, member 1                                                                         | 4.23 | 3.59 | 0.00 |
| A_52_P573552  | NM_144549 | Trib1     | 211770 | tribbles homolog 1 (Drosophila)                                                                            | 3.84 | 3.59 | 0.00 |

|              |           |          |        |                                                                        |      |      |      |
|--------------|-----------|----------|--------|------------------------------------------------------------------------|------|------|------|
|              |           |          |        | Cbp/p300-interacting transactivator, with Glu/Asp-rich                 |      |      |      |
| A_51_P105837 | NM_010828 | Cited2   | 17684  | carboxy-terminal domain, 2                                             | 3.65 | 3.59 | 0.00 |
| A_51_P472867 | NM_145226 | Oas3     | 246727 | 2'-5' oligoadenylate synthetase 3                                      | 2.81 | 3.58 | 0.00 |
| A_52_P15388  | NM_008522 | Ltf      | 17002  | lactotransferrin                                                       | 3.44 | 3.58 | 0.00 |
| A_51_P166886 | NM_011314 | Saa2     | 20209  | serum amyloid A 2                                                      | 2.18 | 3.58 | 0.02 |
| A_51_P436567 | NM_198171 | BC015286 | 234669 | cDNA sequence BC015286                                                 | 2.37 | 3.57 | 0.01 |
| A_51_P516728 | NM_010404 | Hap1     | 15114  | huntingtin-associated protein 1                                        | 3.85 | 3.57 | 0.00 |
| A_51_P118132 | NM_011386 | Skil     | 20482  | SKI-like                                                               | 3.80 | 3.57 | 0.00 |
| A_52_P4657   | NM_172722 | Naa25    | 231713 | N(alpha)-acetyltransferase 25, NatB auxiliary subunit                  | 4.17 | 3.57 | 0.00 |
| A_51_P420547 | NM_172621 | Clic5    | 224796 | chloride intracellular channel 5                                       | 1.76 | 3.57 | 0.13 |
| A_51_P193993 | NM_172621 | Clic5    | 224796 | chloride intracellular channel 5                                       | 2.07 | 3.56 | 0.03 |
| A_52_P210511 | NM_011612 | Tnfrsf9  | 21942  | tumor necrosis factor receptor superfamily, member 9                   | 3.43 | 3.56 | 0.00 |
| A_51_P463765 | NM_011595 | Timp3    | 21859  | tissue inhibitor of metalloproteinase 3                                | 3.88 | 3.56 | 0.00 |
| A_51_P136288 | NM_021718 | Ms4a4b   | 60361  | membrane-spanning 4-domains, subfamily A, member 4B                    | 3.42 | 3.55 | 0.00 |
| A_51_P176365 | NM_175035 | Gimap5   | 317757 | GTPase, IMAP family member 5                                           | 3.15 | 3.55 | 0.00 |
| A_52_P339726 | NA        | NA       | NA     | NA                                                                     | 2.87 | 3.55 | 0.00 |
| A_51_P181691 | NM_145857 | Nod2     | 257632 | nucleotide-binding oligomerization domain containing 2                 | 3.80 | 3.55 | 0.00 |
| A_51_P443857 | NM_145823 | Pitpnc1  | 71795  | phosphatidylinositol transfer protein, cytoplasmic 1                   | 3.24 | 3.54 | 0.00 |
| A_51_P243609 | NM_175934 | Ppp1r10  | 52040  | protein phosphatase 1, regulatory subunit 10                           | 2.93 | 3.54 | 0.00 |
| A_52_P6092   | NM_207269 | NA       | NA     | NA                                                                     | 3.08 | 3.54 | 0.00 |
| A_52_P167278 | NM_172308 | Mthfd1l  | 270685 | methylenetetrahydrofolate dehydrogenase (NADP+ dependent) 1-like       | 4.12 | 3.54 | 0.00 |
| A_52_P456640 | NM_010208 | Fgr      | 14191  | Gardner-Rasheed feline sarcoma viral (Fgr) oncogene homolog            | 2.80 | 3.53 | 0.00 |
| A_52_P287338 | NM_025829 | Eif4e3   | 66892  | eukaryotic translation initiation factor 4E member 3                   | 2.62 | 3.53 | 0.00 |
| A_52_P564413 | NM_207683 | Pik3c2g  | 18705  | phosphatidylinositol 3-kinase, C2 domain containing, gamma polypeptide | 2.99 | 3.53 | 0.00 |
| A_52_P421357 | NM_019765 | Clip1    | 56430  | CAP-GLY domain containing linker protein 1                             | 2.82 | 3.53 | 0.00 |

|               |           |            |        |                                                                                                                               |      |      |      |
|---------------|-----------|------------|--------|-------------------------------------------------------------------------------------------------------------------------------|------|------|------|
| A_51_P369803  | NM_013585 | Psmb9      | 16912  | proteasome (prosome, macropain) subunit, beta type 9 (large multifunctional peptidase 2)                                      | 3.24 | 3.53 | 0.00 |
| A_51_P478555  | NM_010828 | Cited2     | 17684  | Cbp/p300-interacting transactivator, with Glu/Asp-rich carboxy-terminal domain, 2                                             | 2.99 | 3.52 | 0.00 |
| A_52_P517773  | NM_011203 | Ptpn12     | 19248  | protein tyrosine phosphatase, non-receptor type 12                                                                            | 2.35 | 3.52 | 0.01 |
| A_51_P453343  | NM_027869 | Pnpt1      | 71701  | polyribonucleotide nucleotidyltransferase 1                                                                                   | 3.98 | 3.51 | 0.00 |
| A_52_P232813  | NM_203320 | Cxcl3      | 330122 | chemokine (C-X-C motif) ligand 3                                                                                              | 3.28 | 3.51 | 0.00 |
| A_52_P1196729 | AK086288  | NA         | NA     | NA                                                                                                                            | 3.00 | 3.51 | 0.00 |
| A_52_P144263  | NM_020296 | Rbms1      | 56878  | RNA binding motif, single stranded interacting protein 1                                                                      | 2.94 | 3.51 | 0.00 |
| A_52_P638457  | NM_001045 | A430084P05 | 327957 | RIKEN cDNA A430084P05 gene                                                                                                    | 3.30 | 3.50 | 0.00 |
| A_52_P391743  | NM_020518 | Vsig2      | 57276  | V-set and immunoglobulin domain containing 2                                                                                  | 1.54 | 3.50 | 0.34 |
| A_52_P241640  | AK016417  | 4930599N2  | 75379  | RIKEN cDNA 4930599N23 gene                                                                                                    | 3.33 | 3.49 | 0.00 |
| A_52_P50063   | NM_175677 | 9230105E1  | 319236 | RIKEN cDNA 9230105E10 gene                                                                                                    | 3.24 | 3.49 | 0.00 |
| A_52_P332517  | NM_027314 | 5-Mar      | 69104  | membrane-associated ring finger (C3HC4) 5 serine (or cysteine) peptidase inhibitor, clade A, member 4, pseudogene 1           | 3.04 | 3.49 | 0.00 |
| A_51_P339098  | BC031891  | Serpina4-p | 321018 |                                                                                                                               | 2.95 | 3.49 | 0.00 |
| A_51_P300001  | NM_173369 | Cyld       | 74256  | cylindromatosis (turban tumor syndrome)                                                                                       | 2.66 | 3.49 | 0.00 |
| A_52_P129590  | NM_153538 | Zcchc6     | 214290 | zinc finger, CCHC domain containing 6                                                                                         | 3.29 | 3.48 | 0.00 |
| A_52_P924359  | NA        | NA         | NA     | NA                                                                                                                            | 3.64 | 3.48 | 0.00 |
| A_51_P310040  | NM_144904 | Rod1       | 230257 | ROD1 regulator of differentiation 1 ( <i>S. pombe</i> ) tetratricopeptide repeat, ankyrin repeat and coiled-coil containing 1 | 4.48 | 3.48 | 0.00 |
| A_51_P444379  | NM_198294 | Tanc1      | 66860  |                                                                                                                               | 3.83 | 3.48 | 0.00 |
| A_52_P93467   | NM_011521 | Sdc4       | 20971  | syndecan 4                                                                                                                    | 3.04 | 3.47 | 0.00 |
| A_51_P319453  | NM_009281 | Zfp143     | 20841  | zinc finger protein 143                                                                                                       | 2.69 | 3.47 | 0.00 |
| A_52_P535212  | NM_198300 | Cpeb3      | 208922 | cytoplasmic polyadenylation element binding protein 3                                                                         | 3.90 | 3.47 | 0.00 |
| A_51_P367285  | NM_028019 | Rnf135     | 71956  | ring finger protein 135                                                                                                       | 3.68 | 3.46 | 0.00 |
| A_51_P513244  | XM_150216 | 4930422I07 | 71640  | RIKEN cDNA 4930422I07 gene                                                                                                    | 3.61 | 3.46 | 0.00 |
| A_51_P502150  | NM_012030 | Slc9a3r1   | 26941  | solute carrier family 9 (sodium/hydrogen exchanger), member 3 regulator 1                                                     | 3.25 | 3.46 | 0.00 |
| A_51_P238722  | NM_010740 | Cd93       | 17064  | CD93 antigen                                                                                                                  | 3.20 | 3.45 | 0.00 |
| A_51_P202292  | NM_008358 | Il15ra     | 16169  | interleukin 15 receptor, alpha chain                                                                                          | 3.60 | 3.45 | 0.00 |



|               |           |           |        |                                                                                                 |      |      |      |
|---------------|-----------|-----------|--------|-------------------------------------------------------------------------------------------------|------|------|------|
| A_52_P614731  | NM_025278 | Gng12     | 14701  | guanine nucleotide binding protein (G protein), gamma 12                                        | 3.96 | 3.44 | 0.00 |
| A_52_P592466  | NM_023275 | Rhoj      | 80837  | ras homolog gene family, member J                                                               | 4.13 | 3.44 | 0.00 |
| A_52_P262997  | AK013126  | Mrpl38    | 60441  | mitochondrial ribosomal protein L38                                                             | 2.73 | 3.44 | 0.00 |
| A_52_P548680  | AK172036  | Pik3c2a   | 18704  | phosphatidylinositol 3-kinase, C2 domain containing, alpha polypeptide                          | 2.93 | 3.42 | 0.00 |
| A_51_P452119  | NM_008498 | Lhx1      | 16869  | LIM homeobox protein 1                                                                          | 3.10 | 3.42 | 0.00 |
| A_52_P510877  | NM_009743 | Bcl2l1    | 12048  | BCL2-like 1                                                                                     | 3.60 | 3.42 | 0.00 |
| A_51_P265495  | NM_010738 | Ly6a      | 110454 | lymphocyte antigen 6 complex, locus A protein phosphatase 1, regulatory (inhibitor) subunit 15A | 1.81 | 3.42 | 0.10 |
| A_51_P302503  | NM_008654 | Ppp1r15a  | 17872  | 15A                                                                                             | 3.19 | 3.42 | 0.00 |
| A_51_P273213  | NM_145890 | Grhl1     | 195733 | grainyhead-like 1 (Drosophila)                                                                  | 3.59 | 3.41 | 0.00 |
| A_51_P251022  | NM_008880 | Plscr2    | 18828  | phospholipid scramblase 2                                                                       | 3.34 | 3.41 | 0.00 |
| A_52_P273935  | AK020313  | 9230104K2 | 77688  | RIKEN cDNA 9230104K21 gene                                                                      | 2.38 | 3.41 | 0.01 |
| A_52_P495729  | NM_011019 | Osmr      | 18414  | oncostatin M receptor                                                                           | 3.20 | 3.41 | 0.00 |
| A_52_P241484  | NM_021525 | Rcl1      | 59028  | RNA terminal phosphate cyclase-like 1                                                           | 3.67 | 3.41 | 0.00 |
| A_52_P1029186 | NA        | NA        | NA     | NA                                                                                              | 3.59 | 3.41 | 0.00 |
| A_51_P422300  | NM_027209 | Ms4a6b    | 69774  | membrane-spanning 4-domains, subfamily A, member 6B                                             | 2.48 | 3.40 | 0.00 |
| A_52_P109304  | NM_013763 | Tbl2      | 27368  | transducin (beta)-like 2                                                                        | 4.24 | 3.40 | 0.00 |
| A_51_P341647  | NM_007985 | Fancc     | 14088  | Fanconi anemia, complementation group C                                                         | 3.10 | 3.40 | 0.00 |
| A_51_P199057  | NM_029749 | Usp42     | 76800  | ubiquitin specific peptidase 42                                                                 | 3.33 | 3.39 | 0.00 |
| A_51_P160907  | NM_001045 | Morc3     | 338467 | microrchidia 3                                                                                  | 3.30 | 3.39 | 0.00 |
| A_51_P455208  | NM_011204 | Ptpn13    | 19249  | protein tyrosine phosphatase, non-receptor type 13                                              | 2.96 | 3.39 | 0.00 |
| A_51_P430952  | NM_009068 | Ripk1     | 19766  | receptor (TNFRSF)-interacting serine-threonine kinase 1                                         | 3.42 | 3.39 | 0.00 |
| A_51_P134812  | NM_026929 | Chac1     | 69065  | ChaC, cation transport regulator-like 1 (E. coli)                                               | 2.11 | 3.39 | 0.02 |
| A_52_P420792  | NM_001009 | Txnip     | 56338  | thioredoxin interacting protein                                                                 | 1.50 | 3.38 | 0.44 |
| A_52_P674847  | NM_013727 | Azi2      | 27215  | 5-azacytidine induced gene 2                                                                    | 2.97 | 3.38 | 0.00 |
| A_52_P185343  | AK011851  | Gna13     | 14674  | guanine nucleotide binding protein, alpha 13                                                    | 3.71 | 3.37 | 0.00 |
| A_51_P509808  | NM_018828 | Fnbp4     | 55935  | formin binding protein 4                                                                        | 3.03 | 3.37 | 0.00 |
| A_52_P677364  | NM_025840 | Bzw2      | 66912  | basic leucine zipper and W2 domains 2                                                           | 3.22 | 3.37 | 0.00 |
| A_52_P303161  | NM_017379 | Tuba8     | 53857  | tubulin, alpha 8                                                                                | 2.70 | 3.37 | 0.00 |

|              |           |                |        |                                                         |      |      |      |
|--------------|-----------|----------------|--------|---------------------------------------------------------|------|------|------|
| A_52_P212025 | AK012979  | Ror1           | 26563  | receptor tyrosine kinase-like orphan receptor 1         | 3.08 | 3.37 | 0.00 |
| A_51_P279197 | NM_009124 | Atxn1          | 20238  | ataxin 1                                                | 4.27 | 3.37 | 0.00 |
| A_52_P279379 | AV381417  | NA             | NA     | NA                                                      | 3.61 | 3.35 | 0.00 |
| A_51_P161037 | AK172953  | Cep170         | 545389 | centrosomal protein 170                                 | 4.22 | 3.35 | 0.00 |
| A_51_P296866 | NM_008629 | Msi1           | 17690  | Musashi homolog 1(Drosophila)                           | 2.18 | 3.34 | 0.02 |
| A_51_P366836 | NM_173413 | Rab8b          | 235442 | RAB8B, member RAS oncogene family                       | 3.25 | 3.34 | 0.00 |
| A_51_P340601 | NM_009770 | Btg3           | 12228  | B-cell translocation gene 3                             | 2.12 | 3.33 | 0.02 |
| A_51_P327511 | NM_008013 | Fgl2           | 14190  | fibrinogen-like protein 2                               | 2.45 | 3.33 | 0.01 |
| A_51_P105380 | NM_029733 | 2010005H176770 |        | RIKEN cDNA 2010005H15 gene                              | 2.02 | 3.33 | 0.04 |
| A_51_P469285 | NM_008737 | Nrp1           | 18186  | neuropilin 1                                            | 3.31 | 3.33 | 0.00 |
| A_51_P372602 | NM_183262 | Stk35          | 67333  | serine/threonine kinase 35                              | 2.89 | 3.33 | 0.00 |
| A_51_P125716 | NM_031373 | Ogfr           | 72075  | opioid growth factor receptor                           | 4.55 | 3.33 | 0.00 |
| A_51_P125067 | NM_019401 | Nmi            | 64685  | N-myc (and STAT) interactor                             | 2.73 | 3.33 | 0.00 |
| A_52_P973470 | NA        | NA             | NA     | NA                                                      | 3.31 | 3.33 | 0.00 |
|              |           |                |        | UDP-Gal:betaGlcNAc beta 1,4- galactosyltransferase,     |      |      |      |
| A_51_P155257 | NM_022305 | B4galt1        | 14595  | polypeptide 1                                           | 3.51 | 3.32 | 0.00 |
| A_51_P230624 | AK171109  | 2010109K172123 |        | RIKEN cDNA 2010109K11 gene                              | 3.71 | 3.32 | 0.00 |
| A_52_P169901 | NM_001009 | Mcart1         | 230125 | mitochondrial carrier triple repeat 1                   | 2.73 | 3.32 | 0.00 |
| A_51_P265026 | NM_010872 | Naip2          | 17948  | NLR family, apoptosis inhibitory protein 2              | 2.14 | 3.32 | 0.02 |
| A_52_P15166  | NA        | NA             | NA     | NA                                                      | 2.59 | 3.31 | 0.00 |
| A_51_P499918 | NM_010407 | Hck            | 15162  | hemopoietic cell kinase                                 | 3.23 | 3.31 | 0.00 |
| A_52_P513177 | NM_001029 | Sla            | 20491  | src-like adaptor                                        | 3.08 | 3.31 | 0.00 |
|              |           |                |        | TAF7 RNA polymerase II, TATA box binding protein (TBP)- |      |      |      |
| A_52_P83959  | NM_011901 | Taf7           | 24074  | associated factor                                       | 3.79 | 3.31 | 0.00 |
| A_51_P368171 | AK049415  | AU020206       | 101757 | expressed sequence AU020206                             | 2.14 | 3.30 | 0.02 |
| A_52_P193022 | AJ306425  | Hfe            | 15216  | hemochromatosis                                         | 3.22 | 3.30 | 0.00 |
| A_51_P271439 | NM_001033 | Fam59a         | 381126 | family with sequence similarity 59, member A            | 3.15 | 3.30 | 0.00 |
| A_51_P390538 | XM_129176 | NA             | NA     | NA                                                      | 2.54 | 3.30 | 0.00 |
| A_52_P533287 | NM_013637 | Prm1           | 19118  | protamine 1                                             | 1.73 | 3.29 | 0.15 |
| A_51_P154913 | AK037524  | Mctp2          | 244049 | multiple C2 domains, transmembrane 2                    | 2.74 | 3.29 | 0.00 |
| A_52_P180373 | XM_129176 | NA             | NA     | NA                                                      | 3.29 | 3.29 | 0.00 |
| A_52_P472324 | NM_011414 | Slpi           | 20568  | secretory leukocyte peptidase inhibitor                 | 1.75 | 3.29 | 0.14 |
| A_51_P232824 | NM_029857 | Tmco4          | 77056  | transmembrane and coiled-coil domains 4                 | 4.26 | 3.29 | 0.00 |
| A_52_P518827 | NM_009931 | Col4a1         | 12826  | collagen, type IV, alpha 1                              | 2.87 | 3.29 | 0.00 |

|               |           |           |        |                                                                                         |      |      |      |
|---------------|-----------|-----------|--------|-----------------------------------------------------------------------------------------|------|------|------|
| A_52_P544043  | BC013068  | Pcsk5     | 18552  | proprotein convertase subtilisin/kexin type 5                                           | 2.63 | 3.28 | 0.00 |
| A_51_P225592  | NM_001001 | Tpm4      | 326618 | tropomyosin 4                                                                           | 3.34 | 3.28 | 0.00 |
| A_52_P764477  | XM_983705 | NA        | NA     | NA                                                                                      | 2.99 | 3.28 | 0.00 |
| A_51_P427171  | NM_172488 | 9030625AC | 210808 | RIKEN cDNA 9030625A04 gene                                                              | 2.78 | 3.28 | 0.00 |
| A_51_P316949  | XM_618775 | Ccdc6     | 76551  | coiled-coil domain containing 6                                                         | 3.19 | 3.28 | 0.00 |
| A_52_P93488   | NM_001024 | 10-Sep    | 103080 | septin 10                                                                               | 3.38 | 3.28 | 0.00 |
| A_51_P300434  | NM_134448 | Dst       | 13518  | dystonin                                                                                | 2.92 | 3.28 | 0.00 |
| A_51_P119857  | AK017680  | Spred1    | 114715 | sprouty protein with EVH-1 domain 1, related sequence                                   | 3.22 | 3.27 | 0.00 |
| A_51_P258372  | NM_030691 | Igsf6     | 80719  | immunoglobulin superfamily, member 6                                                    | 3.12 | 3.27 | 0.00 |
| A_52_P700056  | BC089618  | Gm11428   | 1E+08  | predicted gene 11428                                                                    | 3.25 | 3.27 | 0.00 |
| A_52_P1034698 | NM_007920 | Elf1      | 13709  | E74-like factor 1                                                                       | 3.47 | 3.27 | 0.00 |
| A_52_P251623  | NM_001004 | BC057022  | 433940 | cDNA sequence BC057022                                                                  | 2.77 | 3.26 | 0.00 |
| A_52_P135572  | BC043710  | Dopey1    | 320615 | dopey family member 1                                                                   | 2.83 | 3.26 | 0.00 |
| A_52_P153864  | NM_010723 | Lmo4      | 16911  | LIM domain only 4                                                                       | 4.02 | 3.26 | 0.00 |
| A_52_P659917  | NM_173423 | Fem1c     | 240263 | fem-1 homolog c (C.elegans)                                                             | 3.74 | 3.26 | 0.00 |
| A_52_P577072  | NM_011901 | Taf7      | 24074  | TAF7 RNA polymerase II, TATA box binding protein (TBP)-associated factor                | 3.28 | 3.26 | 0.00 |
| A_52_P134762  | AK172505  | Ifi203    | 15950  | interferon activated gene 203                                                           | 3.84 | 3.25 | 0.00 |
| A_52_P318361  | NM_145603 | Ces2      | 234671 | carboxylesterase 2                                                                      | 2.11 | 3.25 | 0.02 |
| A_52_P803082  | AK050122  | Apol9a    | 223672 | apolipoprotein L 9a                                                                     | 2.30 | 3.25 | 0.01 |
| A_51_P157193  | NM_023275 | Rhoj      | 80837  | ras homolog gene family, member J                                                       | 3.53 | 3.25 | 0.00 |
| A_51_P478548  | U86445    | Cited2    | 17684  | Cbp/p300-interacting transactivator, with Glu/Asp-rich carboxy-terminal domain, 2       | 2.84 | 3.25 | 0.00 |
| A_51_P130757  | NM_025408 | Acer3     | 66190  | alkaline ceramidase 3                                                                   | 4.21 | 3.25 | 0.00 |
| A_51_P520745  | NM_153544 | BC030867  | 217216 | cDNA sequence BC030867                                                                  | 3.43 | 3.25 | 0.00 |
| A_52_P8174    | AK152321  | Wdr43     | 72515  | WD repeat domain 43                                                                     | 3.20 | 3.25 | 0.00 |
| A_52_P674338  | NM_207655 | Egfr      | 13649  | epidermal growth factor receptor<br>potassium inwardly-rectifying channel, subfamily J, | 2.56 | 3.24 | 0.00 |
| A_52_P225898  | NM_008428 | Kcnj8     | 16523  | member 8                                                                                | 3.20 | 3.24 | 0.00 |
| A_52_P139579  | NM_011710 | Wars      | 22375  | tryptophanyl-tRNA synthetase                                                            | 2.77 | 3.24 | 0.00 |
| A_52_P102931  | AK087160  | Gimap5    | 317757 | GTPase, IMAP family member 5                                                            | 2.90 | 3.24 | 0.00 |
| A_52_P175190  | AK033431  | Egfr      | 13649  | epidermal growth factor receptor                                                        | 3.15 | 3.24 | 0.00 |

|              |           |           |        |                                                                                                                             |      |      |      |
|--------------|-----------|-----------|--------|-----------------------------------------------------------------------------------------------------------------------------|------|------|------|
| A_52_P536082 | NM_027297 | Prpf4     | 70052  | PRP4 pre-mRNA processing factor 4 homolog (yeast)                                                                           | 4.27 | 3.24 | 0.00 |
| A_52_P278549 | NM_010849 | Myc       | 17869  | myelocytomatosis oncogene                                                                                                   | 2.95 | 3.24 | 0.00 |
| A_52_P238159 | BC042188  | Gm9975    | 327988 | predicted gene 9975                                                                                                         | 3.06 | 3.23 | 0.00 |
| A_52_P14456  | AK129457  | Srrm4     | 68955  | serine/arginine repetitive matrix 4                                                                                         | 2.83 | 3.23 | 0.00 |
| A_52_P165315 | NA        | NA        | NA     | NA                                                                                                                          | 3.91 | 3.23 | 0.00 |
| A_51_P359549 | NM_173423 | Fem1c     | 240263 | fem-1 homolog c (C.elegans)                                                                                                 | 3.38 | 3.23 | 0.00 |
| A_52_P325552 | NM_145355 | Rnf185    | 193670 | ring finger protein 185                                                                                                     | 2.82 | 3.23 | 0.00 |
| A_52_P203031 | NM_024457 | Rap1b     | 215449 | RAS related protein 1b                                                                                                      | 3.13 | 3.22 | 0.00 |
| A_52_P518422 | NM_177358 | A630033EC | 240041 | RIKEN cDNA A630033E08 gene                                                                                                  | 2.69 | 3.22 | 0.00 |
| A_51_P236864 | BC021881  | Parp8     | 52552  | poly (ADP-ribose) polymerase family, member 8                                                                               | 3.14 | 3.22 | 0.00 |
| A_52_P357265 | NM_145823 | Pitpnc1   | 71795  | phosphatidylinositol transfer protein, cytoplasmic 1                                                                        | 2.97 | 3.22 | 0.00 |
| A_52_P135873 | NA        | NA        | NA     | NA                                                                                                                          | 2.74 | 3.22 | 0.00 |
| A_51_P489522 | AK150917  | Ctla2b    | 13025  | cytotoxic T lymphocyte-associated protein 2 beta<br>glucosaminyl (N-acetyl) transferase 2, I-branching<br>enzyme            | 2.81 | 3.22 | 0.00 |
| A_52_P24477  | NM_133219 | Gcnt2     | 14538  | enzyme                                                                                                                      | 3.60 | 3.22 | 0.00 |
| A_52_P172405 | XM_985835 | NA        | NA     | NA                                                                                                                          | 2.71 | 3.21 | 0.00 |
| A_52_P212756 | NM_172843 | Tor1aip2  | 240832 | torsin A interacting protein 2                                                                                              | 3.45 | 3.21 | 0.00 |
| A_51_P257134 | NM_019655 | Adar      | 56417  | adenosine deaminase, RNA-specific<br>membrane-spanning 4-domains, subfamily A, member<br>4B                                 | 3.13 | 3.21 | 0.00 |
| A_51_P136289 | NM_021718 | Ms4a4b    | 60361  | 4B                                                                                                                          | 3.10 | 3.21 | 0.00 |
| A_51_P501710 | NM_010303 | Gna13     | 14674  | guanine nucleotide binding protein, alpha 13<br>CD47 antigen (Rh-related antigen, integrin-associated<br>signal transducer) | 3.01 | 3.20 | 0.00 |
| A_51_P325651 | AK164165  | Cd47      | 16423  | signal transducer)                                                                                                          | 3.03 | 3.20 | 0.00 |
| A_51_P219444 | NM_013880 | Plcl2     | 224860 | phospholipase C-like 2                                                                                                      | 2.59 | 3.20 | 0.00 |
| A_51_P438805 | NM_001009 | Txnip     | 56338  | thioredoxin interacting protein                                                                                             | 1.32 | 3.20 | 0.91 |
| A_51_P334155 | AK016318  | 4930579F0 | 67741  | RIKEN cDNA 4930579F01 gene                                                                                                  | 2.61 | 3.20 | 0.00 |
| A_52_P502577 | NM_010101 | S1pr3     | 13610  | sphingosine-1-phosphate receptor 3                                                                                          | 3.54 | 3.20 | 0.00 |
| A_52_P334259 | NA        | NA        | NA     | NA                                                                                                                          | 1.53 | 3.20 | 0.37 |
| A_51_P460153 | AK031247  | Xrn2      | 24128  | 5'-3' exoribonuclease 2                                                                                                     | 2.46 | 3.20 | 0.01 |
| A_52_P661565 | NM_013885 | Clic4     | 29876  | chloride intracellular channel 4 (mitochondrial)                                                                            | 3.95 | 3.20 | 0.00 |
| A_52_P383137 | BC048531  | Rnd1      | 223881 | Rho family GTPase 1                                                                                                         | 3.62 | 3.19 | 0.00 |

|              |           |            |        |                                                                                                             |      |      |      |
|--------------|-----------|------------|--------|-------------------------------------------------------------------------------------------------------------|------|------|------|
| A_51_P305936 | NM_031881 | Nedd4l     | 83814  | neural precursor cell expressed, developmentally down-regulated gene 4-like                                 | 2.66 | 3.19 | 0.00 |
| A_52_P14453  | NM_009124 | Atxn1      | 20238  | ataxin 1                                                                                                    | 3.73 | 3.19 | 0.00 |
| A_51_P322016 | NM_008178 | Gsx1       | 14842  | GS homeobox 1                                                                                               | 1.64 | 3.19 | 0.21 |
| A_52_P259268 | XM_982175 | Gm7969     | 666185 | predicted gene 7969                                                                                         | 2.78 | 3.19 | 0.00 |
| A_51_P388691 | NM_027444 | Bbx        | 70508  | bobby sox homolog (Drosophila)                                                                              | 3.11 | 3.18 | 0.00 |
| A_51_P322542 | AK131987  | Bbx        | 70508  | bobby sox homolog (Drosophila)                                                                              | 2.65 | 3.18 | 0.00 |
| A_51_P208240 | NM_019418 | Tnfsf14    | 50930  | tumor necrosis factor (ligand) superfamily, member 14 transmembrane and tetratricopeptide repeat containing | 3.24 | 3.18 | 0.00 |
| A_52_P557156 | NM_177368 | Tmtc2      | 278279 | 2                                                                                                           | 3.14 | 3.17 | 0.00 |
| A_52_P973486 | BI329779  | NA         | NA     | NA                                                                                                          | 2.17 | 3.17 | 0.02 |
| A_51_P209071 | NM_028469 | 311008211  | 73212  | RIKEN cDNA 3110082117 gene                                                                                  | 2.32 | 3.17 | 0.01 |
| A_51_P424532 | NM_011704 | Vnn1       | 22361  | vanin 1                                                                                                     | 2.51 | 3.17 | 0.00 |
| A_51_P385786 | NM_010495 | Id1        | 15901  | inhibitor of DNA binding 1                                                                                  | 2.95 | 3.16 | 0.00 |
| A_51_P492595 | NM_172518 | Fbxo42     | 213499 | F-box protein 42                                                                                            | 3.21 | 3.16 | 0.00 |
| A_52_P579441 | NM_001045 | Morc3      | 338467 | microrchidia 3                                                                                              | 3.17 | 3.15 | 0.00 |
| A_51_P488211 | NM_153389 | Atp10d     | 231287 | ATPase, class V, type 10D                                                                                   | 1.89 | 3.13 | 0.07 |
| A_52_P78064  | NM_029857 | Tmco4      | 77056  | transmembrane and coiled-coil domains 4                                                                     | 3.73 | 3.13 | 0.00 |
| A_51_P435023 | NM_019713 | Rassf1     | 56289  | Ras association (RalGDS/AF-6) domain family member 1                                                        | 3.53 | 3.13 | 0.00 |
| A_51_P378960 | NM_026054 | 2810474O19 | 167246 | RIKEN cDNA 2810474O19 gene                                                                                  | 2.72 | 3.13 | 0.00 |
| A_52_P281888 | AK016729  | NA         | NA     | NA                                                                                                          | 2.45 | 3.13 | 0.01 |
| A_52_P627269 | NM_198171 | BC015286   | 234669 | cDNA sequence BC015286                                                                                      | 2.03 | 3.13 | 0.04 |
| A_52_P82765  | NA        | NA         | NA     | NA                                                                                                          | 3.14 | 3.13 | 0.00 |
| A_52_P305685 | NA        | NA         | NA     | NA                                                                                                          | 3.18 | 3.12 | 0.00 |
| A_52_P244236 | AK013215  | Tmem87b    | 72477  | transmembrane protein 87B                                                                                   | 4.07 | 3.12 | 0.00 |
| A_51_P493467 | NM_145588 | Kif22      | 110033 | kinesin family member 22                                                                                    | 2.21 | 3.12 | 0.01 |
| A_51_P488799 | NM_173761 | Ythdf1     | 228994 | YTH domain family 1                                                                                         | 3.56 | 3.12 | 0.00 |
| A_52_P5263   | NA        | NA         | NA     | NA                                                                                                          | 1.83 | 3.12 | 0.09 |
| A_52_P174775 | NM_009068 | Ripk1      | 19766  | receptor (TNFRSF)-interacting serine-threonine kinase 1                                                     | 3.62 | 3.11 | 0.00 |
| A_52_P667287 | NM_172856 | Lass6      | 241447 | LAG1 homolog, ceramide synthase 6                                                                           | 3.48 | 3.11 | 0.00 |
| A_51_P430900 | NM_013642 | Dusp1      | 19252  | dual specificity phosphatase 1                                                                              | 2.02 | 3.11 | 0.04 |

|              |           |           |        |                                                       |      |      |      |
|--------------|-----------|-----------|--------|-------------------------------------------------------|------|------|------|
| A_52_P93933  | NM_008562 | Mcl1      | 17210  | myeloid cell leukemia sequence 1                      | 3.27 | 3.11 | 0.00 |
| A_52_P266132 | NM_008013 | Fgl2      | 14190  | fibrinogen-like protein 2                             | 2.40 | 3.11 | 0.01 |
| A_52_P32249  | NM_019464 | Sh3glb1   | 54673  | SH3-domain GRB2-like B1 (endophilin)                  | 3.29 | 3.11 | 0.00 |
| A_52_P460957 | NM_013498 | Crem      | 12916  | cAMP responsive element modulator                     | 3.18 | 3.11 | 0.00 |
| A_51_P229129 | NM_146818 | Olf1r1218 | 258815 | olfactory receptor 1218                               | 2.41 | 3.11 | 0.01 |
| A_52_P437066 | XM_905410 | LOC631287 | 631287 | similar to interferon induced transmembrane protein 2 | 3.59 | 3.10 | 0.00 |
| A_52_P532456 | BC065150  | Plagl1    | 22634  | pleiomorphic adenoma gene-like 1                      | 2.75 | 3.10 | 0.00 |
| A_52_P586104 | NA        | NA        | NA     | NA                                                    | 2.44 | 3.10 | 0.01 |
| A_51_P519251 | NM_019738 | Nupr1     | 56312  | nuclear protein 1                                     | 2.41 | 3.09 | 0.01 |
| A_51_P180747 | NM_007796 | Ctla2a    | 13024  | cytotoxic T lymphocyte-associated protein 2 alpha     | 2.52 | 3.09 | 0.00 |
| A_51_P316523 | NM_008391 | Irf2      | 16363  | interferon regulatory factor 2                        | 2.97 | 3.09 | 0.00 |
| A_51_P183630 | NM_029510 | Bcor      | 71458  | BCL6 interacting corepressor                          | 3.18 | 3.09 | 0.00 |
| A_52_P533809 | NM_010495 | Id1       | 15901  | inhibitor of DNA binding 1                            | 2.91 | 3.08 | 0.00 |
| A_51_P464958 | AK079154  | NA        | NA     | NA                                                    | 2.17 | 3.08 | 0.02 |
| A_52_P532982 | NM_011819 | Gdf15     | 23886  | growth differentiation factor 15                      | 1.98 | 3.08 | 0.04 |
| A_51_P381157 | NM_027420 | 2610034B1 | 70420  | RIKEN cDNA 2610034B18 gene                            | 3.38 | 3.08 | 0.00 |
| A_52_P137500 | AK046255  | Fam199x   | 245622 | family with sequence similarity 199, X-linked         | 3.04 | 3.07 | 0.00 |
| A_52_P483799 | NM_001033 | NA        | NA     | NA                                                    | 3.15 | 3.07 | 0.00 |
| A_51_P229403 | NM_027339 | 2210415F1 | 70163  | RIKEN cDNA 2210415F13 gene                            | 3.03 | 3.07 | 0.00 |
| A_51_P405668 | NM_027314 | 5-Mar     | 69104  | membrane-associated ring finger (C3HC4) 5             | 3.84 | 3.07 | 0.00 |
| A_52_P615247 | NM_001037 | NA        | NA     | NA                                                    | 2.94 | 3.07 | 0.00 |
| A_52_P560889 | NM_054056 | Pawr      | 114774 | PRKC, apoptosis, WT1, regulator                       | 3.19 | 3.07 | 0.00 |
| A_51_P367263 | NM_199222 | Lman1l    | 235416 | lectin, mannose-binding 1 like                        | 2.90 | 3.07 | 0.00 |
| A_51_P387632 | NM_022885 | Slc30a5   | 69048  | solute carrier family 30 (zinc transporter), member 5 | 2.55 | 3.06 | 0.00 |
| A_52_P424308 | NM_176998 | 5730410E1 | 319613 | RIKEN cDNA 5730410E15 gene                            | 2.97 | 3.06 | 0.00 |
| A_51_P437847 | BC087623  | Kctd1     | 106931 | potassium channel tetramerisation domain containing 1 | 2.89 | 3.06 | 0.00 |
| A_52_P105594 | AK086184  | B2m       | 12010  | beta-2 microglobulin                                  | 3.17 | 3.06 | 0.00 |
| A_52_P400509 | AK048970  | Atm       | 11920  | ataxia telangiectasia mutated homolog (human)         | 3.01 | 3.06 | 0.00 |
| A_52_P211956 | NM_025658 | Ms4a4d    | 66607  | membrane-spanning 4-domains, subfamily A, member 4D   | 3.17 | 3.05 | 0.00 |

|              |            |            |        |                                                        |      |      |      |
|--------------|------------|------------|--------|--------------------------------------------------------|------|------|------|
| A_51_P121031 | NM_175188  | 1-Mar      | 72925  | membrane-associated ring finger (C3HC4) 1              | 2.74 | 3.05 | 0.00 |
| A_51_P462751 | M79314     | Rap1b      | 215449 | RAS related protein 1b                                 | 2.58 | 3.05 | 0.00 |
| A_51_P338615 | NM_007414  | Adprh      | 11544  | ADP-ribosylarginine hydrolase                          | 2.64 | 3.04 | 0.00 |
| A_51_P504602 | XM_898838  | NA         | NA     | NA                                                     | 2.73 | 3.04 | 0.00 |
| A_52_P271244 | NM_133692  | Pold3      | 67967  | polymerase (DNA-directed), delta 3, accessory subunit  | 2.63 | 3.04 | 0.00 |
| A_51_P238659 | XM_985835  | NA         | NA     | NA                                                     | 3.46 | 3.04 | 0.00 |
| A_52_P504478 | NM_007414  | Adprh      | 11544  | ADP-ribosylarginine hydrolase                          | 2.50 | 3.04 | 0.00 |
| A_51_P335480 | NM_028077  | 1810055G02 | 72056  | RIKEN cDNA 1810055G02 gene                             | 2.90 | 3.04 | 0.00 |
| A_51_P168459 | NM_030694  | Ifitm2     | 80876  | interferon induced transmembrane protein 2             | 2.79 | 3.03 | 0.00 |
| A_51_P166762 | NM_011192  | Psme3      | 19192  | proteasome (prosome, macropain) 28 subunit, 3          | 3.21 | 3.03 | 0.00 |
| A_51_P502661 | NM_172767  | Vwa5a      | 67776  | von Willebrand factor A domain containing 5A           | 2.89 | 3.03 | 0.00 |
| A_52_P330314 | AK033097   | Lmo4       | 16911  | LIM domain only 4                                      | 2.26 | 3.03 | 0.01 |
| A_52_P262219 | NM_010234  | Fos        | 14281  | FBJ osteosarcoma oncogene                              | 2.04 | 3.03 | 0.03 |
| A_51_P362863 | NM_021525  | Rcl1       | 59028  | RNA terminal phosphate cyclase-like 1                  | 3.53 | 3.02 | 0.00 |
| A_52_P527375 | AK154817   | 3110043O2  | 73205  | RIKEN cDNA 3110043O21 gene                             | 2.08 | 3.02 | 0.03 |
| A_52_P617327 | NM_019466  | Rcan1      | 54720  | regulator of calcineurin 1                             | 3.04 | 3.02 | 0.00 |
| A_51_P105017 | NM_011236  | Rad52      | 19365  | RAD52 homolog ( <i>S. cerevisiae</i> )                 | 3.91 | 3.02 | 0.00 |
| A_52_P201359 | XM_129509  | Cep350     | 74081  | centrosomal protein 350                                | 3.38 | 3.01 | 0.00 |
| A_51_P196844 | NM_027881  | Osbpl3     | 71720  | oxysterol binding protein-like 3                       | 2.90 | 3.01 | 0.00 |
| A_51_P453142 | BC060722   | Ibtk       | 108837 | inhibitor of Bruton agammaglobulinemia tyrosine kinase | 3.36 | 3.00 | 0.00 |
| A_52_P520720 | AK089002   | Jmjd1c     | 108829 | jumonji domain containing 1C                           | 4.01 | 3.00 | 0.00 |
| A_51_P414889 | NM_027320  | Ifi35      | 70110  | interferon-induced protein 35                          | 3.09 | 2.99 | 0.00 |
| A_51_P407028 | NM_007607  | Car4       | 12351  | carbonic anhydrase 4                                   | 2.33 | 2.99 | 0.01 |
| A_52_P253167 | NM_172843  | Tor1aip2   | 240832 | torsin A interacting protein 2                         | 2.85 | 2.99 | 0.00 |
| A_52_P384901 | XM_001005C | Wdr43      | 72515  | WD repeat domain 43                                    | 3.21 | 2.99 | 0.00 |
| A_51_P467025 | NM_053099  | Setbp1     | 240427 | SET binding protein 1                                  | 2.80 | 2.98 | 0.00 |
| A_52_P577123 | AK220172   | Clip1      | 56430  | CAP-GLY domain containing linker protein 1             | 2.50 | 2.98 | 0.00 |
| A_51_P396198 | BG296545   | NA         | NA     | NA                                                     | 2.62 | 2.97 | 0.00 |
| A_52_P131458 | NM_027238  | Ttc39b     | 69863  | tetratricopeptide repeat domain 39B                    | 2.84 | 2.97 | 0.00 |
| A_51_P289647 | NM_173386  | E330016A1  | 214763 | RIKEN cDNA E330016A19 gene                             | 3.17 | 2.97 | 0.00 |
| A_51_P359822 | NM_009160  | Sftpd      | 20390  | surfactant associated protein D                        | 1.81 | 2.96 | 0.10 |

|              |            |            |        |                                                                                                           |      |      |      |
|--------------|------------|------------|--------|-----------------------------------------------------------------------------------------------------------|------|------|------|
| A_51_P424828 | NM_026425  | Naa20      | 67877  | N(alpha)-acetyltransferase 20, NatB catalytic subunit                                                     | 2.58 | 2.96 | 0.00 |
| A_51_P241074 | NM_008927  | Map2k1     | 26395  | mitogen-activated protein kinase kinase 1                                                                 | 2.27 | 2.96 | 0.01 |
| A_52_P135392 | BC004016   | Uck2       | 80914  | uridine-cytidine kinase 2                                                                                 | 3.16 | 2.96 | 0.00 |
| A_52_P148764 | NM_177115  | 3-Mar      | 320253 | membrane-associated ring finger (C3HC4) 3                                                                 | 3.55 | 2.96 | 0.00 |
| A_52_P185079 | NM_013842  | Xbp1       | 22433  | X-box binding protein 1                                                                                   | 2.25 | 2.96 | 0.01 |
| A_52_P631307 | AK043577   | Ypel4      | 241525 | yippee-like 4 (Drosophila)                                                                                | 2.86 | 2.95 | 0.00 |
| A_51_P143224 | NM_013594  | Mbd1       | 17190  | methyl-CpG binding domain protein 1                                                                       | 2.57 | 2.95 | 0.00 |
| A_52_P391098 | NM_013498  | Crem       | 12916  | cAMP responsive element modulator                                                                         | 2.99 | 2.95 | 0.00 |
| A_51_P294555 | NM_0010331 | lfitm6     | 213002 | interferon induced transmembrane protein 6                                                                | 2.85 | 2.95 | 0.00 |
| A_51_P469968 | NM_013819  | H2-M3      | 14991  | histocompatibility 2, M region locus 3                                                                    | 2.36 | 2.95 | 0.01 |
| A_51_P511236 | NM_001077  | Pik3r1     | 18708  | phosphatidylinositol 3-kinase, regulatory subunit, polypeptide 1 (p85 alpha)                              | 3.71 | 2.95 | 0.00 |
| A_52_P338816 | AK164710   | Zufsp      | 72580  | zinc finger with UFM1-specific peptidase domain transmembrane emp24 protein transport domain containing 5 | 3.14 | 2.95 | 0.00 |
| A_51_P367434 | NM_028876  | Tmed5      | 73130  | containing 5                                                                                              | 2.73 | 2.95 | 0.00 |
| A_52_P450183 | AK122234   | Rapgef5    | 217944 | Rap guanine nucleotide exchange factor (GEF) 5                                                            | 3.98 | 2.95 | 0.00 |
| A_51_P174681 | NM_025840  | Bzw2       | 66912  | basic leucine zipper and W2 domains 2                                                                     | 3.19 | 2.95 | 0.00 |
| A_51_P111612 | NM_001042  | Arrdc4     | 66412  | arrestin domain containing 4                                                                              | 2.50 | 2.95 | 0.00 |
| A_52_P467449 | NM_007440  | Alox12     | 11684  | arachidonate 12-lipoxygenase                                                                              | 2.50 | 2.94 | 0.00 |
| A_51_P121447 | NM_054099  | 1110038F1  | 117171 | RIKEN cDNA 1110038F14 gene                                                                                | 2.60 | 2.94 | 0.00 |
| A_51_P507622 | NM_181593  | ltpkc      | 233011 | inositol 1,4,5-trisphosphate 3-kinase C                                                                   | 2.89 | 2.94 | 0.00 |
| A_51_P371174 | NM_013863  | Bag3       | 29810  | BCL2-associated athanogene 3                                                                              | 3.06 | 2.94 | 0.00 |
| A_51_P274667 | XM_129972  | NA         | NA     | NA                                                                                                        | 3.94 | 2.94 | 0.00 |
| A_51_P291210 | NM_027373  | Afap1      | 70292  | actin filament associated protein 1                                                                       | 1.81 | 2.94 | 0.10 |
| A_51_P491976 | NM_175401  | Fbxw17     | 109082 | F-box and WD-40 domain protein 17                                                                         | 2.54 | 2.94 | 0.00 |
| A_52_P46085  | NM_080638  | Mvp        | 78388  | major vault protein                                                                                       | 3.46 | 2.94 | 0.00 |
| A_51_P354333 | NM_016856  | Cpsf2      | 51786  | cleavage and polyadenylation specific factor 2                                                            | 3.37 | 2.93 | 0.00 |
| A_51_P356283 | NM_133765  | Fbxo31     | 76454  | F-box protein 31                                                                                          | 3.31 | 2.92 | 0.00 |
| A_52_P341489 | NM_001039  | Gm7120     | 633640 | predicted gene 7120                                                                                       | 1.83 | 2.92 | 0.09 |
| A_52_P202029 | NM_172406  | Trak2      | 70827  | trafficking protein, kinesin binding 2                                                                    | 3.12 | 2.92 | 0.00 |
| A_52_P440481 | NM_177358  | A630033E08 | 240041 | RIKEN cDNA A630033E08 gene                                                                                | 2.66 | 2.92 | 0.00 |
| A_52_P346231 | NM_013727  | Azi2       | 27215  | 5-azacytidine induced gene 2                                                                              | 2.87 | 2.92 | 0.00 |



|              |           |           |        |                                                               |      |      |      |
|--------------|-----------|-----------|--------|---------------------------------------------------------------|------|------|------|
| A_52_P38317  | AK046153  | Naa20     | 67877  | N(alpha)-acetyltransferase 20, NatB catalytic subunit         | 3.19 | 2.92 | 0.00 |
| A_52_P252305 | NM_028527 | 170004711 | 73385  | RIKEN cDNA 1700047117 gene 1                                  | 2.87 | 2.91 | 0.00 |
| A_52_P13305  | NM_138953 | Ell2      | 192657 | elongation factor RNA polymerase II 2                         | 2.87 | 2.91 | 0.00 |
| A_52_P429308 | NM_025994 | Efhd2     | 27984  | EF hand domain containing 2                                   | 3.46 | 2.91 | 0.00 |
| A_52_P255250 | NM_009543 | Rnf103    | 22644  | ring finger protein 103                                       | 3.05 | 2.91 | 0.00 |
| A_51_P173709 | NM_022420 | Gprc5b    | 64297  | G protein-coupled receptor, family C, group 5, member B       | 2.00 | 2.90 | 0.04 |
| A_52_P391095 | NM_013498 | Crem      | 12916  | cAMP responsive element modulator                             | 2.79 | 2.90 | 0.00 |
| A_51_P341203 | NM_017396 | Cyp3a41a  | 53973  | cytochrome P450, family 3, subfamily a, polypeptide 41A       | 2.99 | 2.90 | 0.00 |
| A_51_P116838 | NM_010024 | Dct       | 13190  | dopachrome tautomerase                                        | 1.70 | 2.90 | 0.16 |
| A_51_P461108 | NM_148958 | Osbpl10   | 74486  | oxysterol binding protein-like 10                             | 2.63 | 2.90 | 0.00 |
| A_51_P331841 | NM_175369 | Ccdc122   | 108811 | coiled-coil domain containing 122                             | 3.47 | 2.89 | 0.00 |
| A_51_P274803 | NM_175648 | A530023O  | 244183 | RIKEN cDNA A530023O14 gene                                    | 2.84 | 2.89 | 0.00 |
| A_51_P291033 | BC057625  | Ubr4      | 69116  | ubiquitin protein ligase E3 component n-recognin 4            | 2.16 | 2.89 | 0.02 |
| A_52_P515336 | AK045877  | Atp6v0a1  | 11975  | ATPase, H+ transporting, lysosomal V0 subunit A1              | 3.40 | 2.89 | 0.00 |
| A_51_P148744 | NM_207277 | A930005I0 | 403174 | RIKEN cDNA A930005I04 gene                                    | 3.42 | 2.89 | 0.00 |
| A_51_P239654 | NM_010444 | Nr4a1     | 15370  | nuclear receptor subfamily 4, group A, member 1               | 1.81 | 2.89 | 0.11 |
| A_51_P473576 | NM_009687 | Apex1     | 11792  | apurinic/apyrimidinic endonuclease 1                          | 3.50 | 2.89 | 0.00 |
| A_51_P241407 | BU557601  | NA        | NA     | NA                                                            | 3.27 | 2.88 | 0.00 |
| A_52_P655778 | XR_002713 | NA        | NA     | NA                                                            | 2.50 | 2.88 | 0.00 |
| A_51_P408946 | NM_007633 | Ccne1     | 12447  | cyclin E1                                                     | 2.22 | 2.88 | 0.01 |
| A_52_P83913  | NM_138744 | Ssx2ip    | 99167  | synovial sarcoma, X breakpoint 2 interacting protein          | 3.49 | 2.88 | 0.00 |
| A_52_P772671 | NA        | NA        | NA     | NA                                                            | 3.23 | 2.88 | 0.00 |
| A_52_P138822 | NM_016888 | B3gnt2    | 53625  | UDP-GlcNAc:betaGal beta-1,3-N-acetylglucosaminyltransferase 2 | 2.59 | 2.88 | 0.00 |
| A_51_P295420 | NM_145931 | Zc3h7a    | 106205 | zinc finger CCCH type containing 7 A                          | 2.85 | 2.88 | 0.00 |
| A_51_P229076 | NM_009847 | Cd2ap     | 12488  | CD2-associated protein                                        | 3.15 | 2.88 | 0.00 |
| A_51_P267239 | NM_019980 | Litaf     | 56722  | LPS-induced TN factor                                         | 2.70 | 2.87 | 0.00 |
| A_51_P153982 | NM_001029 | Cytsb     | 432572 | cytospin B                                                    | 2.68 | 2.87 | 0.00 |

|              |           |         |        |                                                                     |      |      |      |
|--------------|-----------|---------|--------|---------------------------------------------------------------------|------|------|------|
| A_51_P415688 | NM_025278 | Gng12   | 14701  | guanine nucleotide binding protein (G protein), gamma 12            | 4.02 | 2.87 | 0.00 |
| A_51_P169401 | NM_008514 | Lrp6    | 16974  | low density lipoprotein receptor-related protein 6                  | 2.30 | 2.87 | 0.01 |
| A_51_P304065 | NA        | NA      | NA     | NA                                                                  | 2.64 | 2.87 | 0.00 |
| A_51_P297679 | NM_008225 | Hcls1   | 15163  | hematopoietic cell specific Lyn substrate 1                         | 3.40 | 2.87 | 0.00 |
| A_51_P178692 | NM_007930 | Enc1    | 13803  | ectodermal-neural cortex 1                                          | 2.57 | 2.87 | 0.00 |
| A_51_P108108 | NM_153074 | Lrrc25  | 211228 | leucine rich repeat containing 25                                   | 2.40 | 2.86 | 0.01 |
| A_52_P559975 | NM_009909 | Cxcr2   | 12765  | chemokine (C-X-C motif) receptor 2                                  | 3.64 | 2.86 | 0.00 |
| A_52_P3412   | NM_144933 | Med17   | 234959 | mediator complex subunit 17                                         | 3.17 | 2.86 | 0.00 |
| A_52_P343839 | NM_028810 | Rnd3    | 74194  | Rho family GTPase 3                                                 | 2.95 | 2.86 | 0.00 |
| A_51_P378415 | NM_146002 | Rhbdd2  | 215160 | rhomboid domain containing 2                                        | 3.21 | 2.86 | 0.00 |
| A_52_P331701 | NM_207669 | Gabpb1  | 14391  | GA repeat binding protein, beta 1                                   | 3.26 | 2.85 | 0.00 |
| A_51_P136521 | NM_026671 | Lypd2   | 68311  | Ly6/Plaur domain containing 2                                       | 1.91 | 2.85 | 0.06 |
| A_51_P423091 | NM_008027 | Flot1   | 14251  | flotillin 1                                                         | 3.85 | 2.84 | 0.00 |
| A_52_P636446 | NM_001008 | Plekhn1 | 231002 | pleckstrin homology domain containing, family N member 1            | 1.45 | 2.84 | 0.55 |
| A_51_P318192 | NM_010276 | Gem     | 14579  | GTP binding protein (gene overexpressed in skeletal muscle)         | 2.76 | 2.84 | 0.00 |
| A_51_P254646 | NM_030887 | Jdp2    | 81703  | Jun dimerization protein 2                                          | 3.69 | 2.84 | 0.00 |
| A_52_P598774 | NM_001001 | Baz2b   | 407823 | bromodomain adjacent to zinc finger domain, 2B                      | 2.08 | 2.84 | 0.03 |
| A_52_P640282 | NM_009121 | Sat1    | 20229  | spermidine/spermine N1-acetyl transferase 1                         | 2.96 | 2.84 | 0.00 |
| A_52_P386075 | AK084071  | Gm10021 | 622931 | predicted gene 10021                                                | 2.17 | 2.84 | 0.02 |
| A_52_P447064 | AK076401  | NA      | NA     | NA                                                                  | 2.80 | 2.84 | 0.00 |
| A_52_P222135 | NM_001033 | Lrch1   | 380916 | leucine-rich repeats and calponin homology (CH) domain containing 1 | 2.97 | 2.83 | 0.00 |
| A_52_P209184 | NM_007791 | Csrp1   | 13007  | cysteine and glycine-rich protein 1                                 | 2.80 | 2.83 | 0.00 |
| A_51_P301117 | NA        | NA      | NA     | NA                                                                  | 2.67 | 2.83 | 0.00 |
| A_51_P473923 | NM_207215 | Mycbp2  | 105689 | MYC binding protein 2                                               | 2.59 | 2.83 | 0.00 |
| A_52_P491508 | NM_008576 | Abcc1   | 17250  | ATP-binding cassette, sub-family C (CFTR/MRP), member 1             | 3.73 | 2.83 | 0.00 |
| A_51_P235984 | NM_008348 | Il10ra  | 16154  | interleukin 10 receptor, alpha                                      | 2.91 | 2.82 | 0.00 |
| A_52_P20765  | NM_134164 | Syt12   | 171180 | synaptotagmin XII                                                   | 2.64 | 2.82 | 0.00 |
| A_51_P345396 | NM_173399 | Zbtb5   | 230119 | zinc finger and BTB domain containing 5                             | 1.59 | 2.82 | 0.27 |

|              |            |           |        |                                                             |      |      |      |
|--------------|------------|-----------|--------|-------------------------------------------------------------|------|------|------|
| A_51_P508029 | NM_025823  | Pcyox1    | 66881  | prenylcysteine oxidase 1                                    | 2.48 | 2.82 | 0.00 |
|              |            |           |        | glial cell line derived neurotrophic factor family receptor |      |      |      |
| A_52_P311022 | NM_010279  | Gfra1     | 14585  | alpha 1                                                     | 3.73 | 2.82 | 0.00 |
| A_51_P164014 | NM_173762  | Cenpe     | 229841 | centromere protein E                                        | 1.83 | 2.81 | 0.09 |
| A_51_P295206 | NM_178309  | Brip1     | 237911 | BRCA1 interacting protein C-terminal helicase 1             | 2.03 | 2.81 | 0.03 |
|              |            |           |        | gremlin 2 homolog, cysteine knot superfamily (Xenopus       |      |      |      |
| A_51_P152990 | NM_011825  | Grem2     | 23893  | laevis)                                                     | 3.38 | 2.81 | 0.00 |
| A_52_P631726 | NM_001045! | NA        | NA     | NA                                                          | 1.87 | 2.81 | 0.07 |
| A_51_P362202 | NM_175308  | Mobkl2c   | 100465 | MOB1, Mps One Binder kinase activator-like 2C (yeast)       | 3.23 | 2.81 | 0.00 |
| A_52_P68440  | NA         | NA        | NA     | NA                                                          | 2.60 | 2.81 | 0.00 |
| A_51_P442933 | NM_177275  | Amigo3    | 320844 | adhesion molecule with Ig like domain 3                     | 2.49 | 2.81 | 0.00 |
| A_51_P518528 | NM_172920  | Dpy19l1   | 244745 | dpy-19-like 1 (C. elegans)                                  | 3.19 | 2.81 | 0.00 |
| A_51_P318410 | AK029097   | AI848100  | 226551 | expressed sequence AI848100                                 | 2.61 | 2.80 | 0.00 |
| A_51_P380861 | AK172225   | 9130208E0 | 77670  | RIKEN cDNA 9130208E07 gene                                  | 2.24 | 2.80 | 0.01 |
| A_52_P68107  | NM_012051  | Etv3      | 27049  | ets variant gene 3                                          | 3.22 | 2.80 | 0.00 |
| A_51_P175681 | XR_001627  | Gm8995    | 668139 | predicted gene 8995                                         | 3.50 | 2.80 | 0.00 |
|              |            |           |        | transducin-like enhancer of split 3, homolog of             |      |      |      |
| A_52_P590740 | BC056465   | Tle3      | 21887  | Drosophila E(spl)                                           | 3.57 | 2.80 | 0.00 |
| A_52_P445135 | NA         | NA        | NA     | NA                                                          | 3.41 | 2.80 | 0.00 |
| A_51_P213544 | NM_010637  | Klf4      | 16600  | Kruppel-like factor 4 (gut)                                 | 1.79 | 2.80 | 0.11 |
| A_52_P344160 | NM_182995  | 6330503K2 | 101565 | RIKEN cDNA 6330503K22 gene                                  | 2.28 | 2.80 | 0.01 |
| A_51_P348494 | NM_009121  | Sat1      | 20229  | spermidine/spermine N1-acetyl transferase 1                 | 2.91 | 2.80 | 0.00 |
| A_52_P462203 | NM_146114  | Dclre1c   | 227525 | DNA cross-link repair 1C, PSO2 homolog (S. cerevisiae)      | 2.94 | 2.80 | 0.00 |
| A_51_P493649 | NM_023135  | Sult1e1   | 20860  | sulfotransferase family 1E, member 1                        | 2.05 | 2.80 | 0.03 |
| A_51_P145260 | NM_175303  | Sall4     | 99377  | sal-like 4 (Drosophila)                                     | 1.29 | 2.80 | 1.04 |
| A_51_P481930 | NM_007662  | Cdh15     | 12555  | cadherin 15                                                 | 1.45 | 2.80 | 0.53 |
| A_52_P272217 | NM_031373  | Ogfr      | 72075  | opioid growth factor receptor                               | 3.62 | 2.80 | 0.00 |
| A_51_P438165 | NM_153800  | Arhgap22  | 239027 | Rho GTPase activating protein 22                            | 2.88 | 2.79 | 0.00 |
| A_52_P640474 | NM_013531  | Gnb4      | 14696  | guanine nucleotide binding protein (G protein), beta 4      | 2.58 | 2.79 | 0.00 |
| A_51_P331752 | NM_011330  | Ccl11     | 20292  | chemokine (C-C motif) ligand 11                             | 2.64 | 2.79 | 0.00 |
| A_51_P380178 | NM_008321  | Id3       | 15903  | inhibitor of DNA binding 3                                  | 2.81 | 2.79 | 0.00 |

|              |            |           |        |                                                                                  |      |      |      |
|--------------|------------|-----------|--------|----------------------------------------------------------------------------------|------|------|------|
| A_51_P453351 | NM_172266  | Lpgat1    | 226856 | lysophosphatidylglycerol acyltransferase 1                                       | 3.41 | 2.79 | 0.00 |
| A_52_P200244 | NM_011479  | Sptlc2    | 20773  | serine palmitoyltransferase, long chain base subunit 2                           | 2.98 | 2.79 | 0.00 |
| A_52_P626796 | XM_0010067 | NA        | NA     | NA                                                                               | 3.86 | 2.79 | 0.00 |
| A_52_P479599 | NM_010438  | Hk1       | 15275  | hexokinase 1                                                                     | 1.58 | 2.79 | 0.28 |
| A_52_P369769 | AK170314   | Nrg1      | 211323 | neuregulin 1                                                                     | 3.06 | 2.79 | 0.00 |
| A_51_P115441 | NM_009468  | Dpysl3    | 22240  | dihydropyrimidinase-like 3                                                       | 3.42 | 2.79 | 0.00 |
| A_51_P351872 | NM_008135  | Slc6a9    | 14664  | solute carrier family 6 (neurotransmitter transporter, glycine), member 9        | 3.42 | 2.79 | 0.00 |
| A_52_P357177 | NM_001005  | Mtus1     | 102103 | mitochondrial tumor suppressor 1                                                 | 2.67 | 2.78 | 0.00 |
| A_52_P601688 | NM_008576  | Abcc1     | 17250  | ATP-binding cassette, sub-family C (CFTR/MRP), member 1                          | 2.99 | 2.78 | 0.00 |
| A_51_P250049 | AK087715   | NA        | NA     | NA                                                                               | 2.20 | 2.78 | 0.01 |
| A_51_P215863 | AK079230   | NA        | NA     | NA                                                                               | 3.21 | 2.78 | 0.00 |
| A_51_P443946 | AK018542   | 9030607L2 | 71513  | RIKEN cDNA 9030607L20 gene                                                       | 2.92 | 2.77 | 0.00 |
| A_52_P152133 | NM_023124  | H2-Q8     | 15019  | histocompatibility 2, Q region locus 8                                           | 3.37 | 2.77 | 0.00 |
| A_52_P206627 | NM_028032  | Ppp2r2a   | 71978  | protein phosphatase 2 (formerly 2A), regulatory subunit B (PR 52), alpha isoform | 2.46 | 2.76 | 0.01 |
| A_51_P136294 | NM_021718  | Ms4a4b    | 60361  | membrane-spanning 4-domains, subfamily A, member 4B                              | 2.59 | 2.76 | 0.00 |
| A_51_P515348 | NM_133757  | Pgs1      | 74451  | phosphatidylglycerophosphate synthase 1                                          | 2.63 | 2.76 | 0.00 |
| A_52_P432170 | AK021294   | 2810416G2 | 1E+08  | RIKEN cDNA 2810416G20 gene                                                       | 2.54 | 2.76 | 0.00 |
| A_51_P336325 | NM_008768  | Orm1      | 18405  | orosomuroid 1                                                                    | 3.05 | 2.76 | 0.00 |
| A_51_P182662 | NM_010878  | Nck1      | 17973  | non-catalytic region of tyrosine kinase adaptor protein 1                        | 2.81 | 2.76 | 0.00 |
| A_52_P582261 | NM_175115  | Ikzf5     | 67143  | IKAROS family zinc finger 5                                                      | 3.31 | 2.75 | 0.00 |
| A_51_P520966 | NM_015790  | Icosl     | 50723  | icos ligand                                                                      | 3.00 | 2.75 | 0.00 |
| A_52_P545255 | NM_016856  | Cpsf2     | 51786  | cleavage and polyadenylation specific factor 2                                   | 2.95 | 2.75 | 0.00 |
| A_51_P419389 | NM_007561  | Bmpr2     | 12168  | bone morphogenic protein receptor, type II (serine/threonine kinase)             | 2.67 | 2.75 | 0.00 |
| A_51_P302538 | NM_145458  | Pxk       | 218699 | PX domain containing serine/threonine kinase                                     | 2.60 | 2.75 | 0.00 |
| A_52_P103590 | NM_172920  | Dpy19l1   | 244745 | dpy-19-like 1 (C. elegans)                                                       | 2.13 | 2.74 | 0.02 |
| A_51_P458781 | NM_008278  | Hpgd      | 15446  | hydroxyprostaglandin dehydrogenase 15 (NAD)                                      | 1.94 | 2.74 | 0.05 |
| A_51_P421734 | NM_011390  | Slc12a7   | 20499  | solute carrier family 12, member 7                                               | 3.04 | 2.74 | 0.00 |

|               |              |           |        |                                                                                |      |      |      |
|---------------|--------------|-----------|--------|--------------------------------------------------------------------------------|------|------|------|
| A_52_P342836  | NM_001033:NA | NA        | NA     | protein phosphatase 2 (formerly 2A), regulatory subunit                        | 2.44 | 2.73 | 0.01 |
| A_51_P301736  | NM_028032    | Ppp2r2a   | 71978  | B (PR 52), alpha isoform                                                       | 3.34 | 2.73 | 0.00 |
| A_52_P858226  | AK013332     | 2810452K0 | 72784  | RIKEN cDNA 2810452K05 gene                                                     | 2.36 | 2.73 | 0.01 |
| A_51_P454008  | NM_008489    | Lbp       | 16803  | lipopolysaccharide binding protein                                             | 2.39 | 2.73 | 0.01 |
| A_52_P135398  | NA           | NA        | NA     | NA                                                                             | 3.12 | 2.73 | 0.00 |
| A_51_P202512  | NM_173182    | Fndc3b    | 72007  | fibronectin type III domain containing 3B                                      | 2.25 | 2.72 | 0.01 |
| A_52_P1147595 | AK033690     | 9130221J1 | 102123 | RIKEN cDNA 9130221J18 gene                                                     | 2.37 | 2.72 | 0.01 |
| A_52_P681557  | XM_149291    | NA        | NA     | NA                                                                             | 2.99 | 2.72 | 0.00 |
| A_51_P174653  | NM_019643    | Fam60a    | 56306  | family with sequence similarity 60, member A                                   | 2.92 | 2.72 | 0.00 |
| A_51_P488175  | AK053606     | Phf20l1   | 239510 | PHD finger protein 20-like 1                                                   | 3.12 | 2.72 | 0.00 |
| A_52_P113591  | NM_011236    | Rad52     | 19365  | RAD52 homolog ( <i>S. cerevisiae</i> )                                         | 3.60 | 2.72 | 0.00 |
| A_51_P186531  | NM_025289    | Tbrg1     | 21376  | transforming growth factor beta regulated gene 1                               | 3.05 | 2.72 | 0.00 |
| A_52_P54439   | NM_010878    | Nck1      | 17973  | non-catalytic region of tyrosine kinase adaptor protein 1                      | 3.05 | 2.72 | 0.00 |
| A_51_P142744  | NM_172294    | Sulf1     | 240725 | sulfatase 1                                                                    | 1.76 | 2.72 | 0.13 |
| A_51_P148037  | NM_177364    | Sh3pxd2b  | 268396 | SH3 and PX domains 2B<br>CD47 antigen (Rh-related antigen, integrin-associated | 2.85 | 2.72 | 0.00 |
| A_51_P200535  | AK164165     | Cd47      | 16423  | signal transducer)                                                             | 2.43 | 2.72 | 0.01 |
| A_52_P653719  | NM_009005    | Rab7      | 19349  | RAB7, member RAS oncogene family                                               | 3.16 | 2.72 | 0.00 |
| A_52_P437860  | NM_026054    | 2810474O1 | 167246 | RIKEN cDNA 2810474O19 gene                                                     | 2.41 | 2.72 | 0.01 |
| A_51_P377376  | NM_178846    | Gnl3      | 30877  | guanine nucleotide binding protein-like 3 (nucleolar)                          | 2.59 | 2.72 | 0.00 |
| A_51_P283590  | NM_010730    | Anxa1     | 16952  | annexin A1                                                                     | 3.53 | 2.71 | 0.00 |
| A_51_P355852  | NM_008856    | Prkch     | 18755  | protein kinase C, eta                                                          | 2.05 | 2.70 | 0.03 |
| A_52_P239726  | AK052358     | Larp4     | 207214 | La ribonucleoprotein domain family, member 4                                   | 3.33 | 2.70 | 0.00 |
| A_52_P218058  | NM_001038    | Clec5a    | 23845  | C-type lectin domain family 5, member a                                        | 2.90 | 2.70 | 0.00 |
| A_52_P493091  | NM_008031    | Fmr1      | 14265  | fragile X mental retardation syndrome 1 homolog                                | 2.76 | 2.70 | 0.00 |
| A_52_P599055  | NM_172599    | D14Ertd43 | 218978 | DNA segment, Chr 14, ERATO Doi 436, expressed                                  | 2.25 | 2.70 | 0.01 |
| A_52_P354363  | NM_026574    | Ino80     | 68142  | INO80 homolog ( <i>S. cerevisiae</i> )                                         | 2.36 | 2.70 | 0.01 |
| A_51_P430450  | NM_026454    | Ube2f     | 67921  | ubiquitin-conjugating enzyme E2F (putative)                                    | 2.68 | 2.69 | 0.00 |
| A_52_P609109  | NM_145823    | Pitpnc1   | 71795  | phosphatidylinositol transfer protein, cytoplasmic 1                           | 3.07 | 2.69 | 0.00 |

|              |           |         |        |                                                                              |      |      |      |
|--------------|-----------|---------|--------|------------------------------------------------------------------------------|------|------|------|
| A_52_P364130 | NM_016896 | Map3k14 | 53859  | mitogen-activated protein kinase kinase kinase 14                            | 2.82 | 2.69 | 0.00 |
| A_52_P404403 | NM_011917 | Xrn2    | 24128  | 5'-3' exoribonuclease 2                                                      | 2.07 | 2.69 | 0.03 |
| A_52_P214740 | NM_019949 | Ube2l6  | 56791  | ubiquitin-conjugating enzyme E2L 6                                           | 2.44 | 2.69 | 0.01 |
| A_52_P420138 | XM_133543 | Akap13  | 75547  | A kinase (PRKA) anchor protein 13                                            | 2.33 | 2.69 | 0.01 |
| A_52_P436238 | NM_013614 | Odc1    | 18263  | ornithine decarboxylase, structural 1                                        | 2.70 | 2.69 | 0.00 |
| A_52_P284203 | XR_004371 | NA      | NA     | NA                                                                           | 2.41 | 2.68 | 0.01 |
| A_52_P620641 | NM_178647 | Cggbp1  | 106143 | CGG triplet repeat binding protein 1                                         | 1.99 | 2.68 | 0.04 |
| A_51_P165060 | NM_011396 | Slc22a5 | 20520  | solute carrier family 22 (organic cation transporter), member 5              | 1.98 | 2.68 | 0.04 |
| A_52_P372122 | NM_173443 | Vcpip1  | 70675  | valosin containing protein (p97)/p47 complex interacting protein 1           | 2.85 | 2.68 | 0.00 |
| A_52_P194929 | XM_109726 | NA      | NA     | NA                                                                           | 2.30 | 2.68 | 0.01 |
| A_52_P328044 | NM_011599 | Tle1    | 21885  | transducin-like enhancer of split 1, homolog of Drosophila E(spl)            | 2.30 | 2.68 | 0.01 |
| A_52_P416309 | NM_173734 | Tmem87a | 211499 | transmembrane protein 87A                                                    | 2.62 | 2.68 | 0.00 |
| A_52_P17081  | NM_025408 | Acer3   | 66190  | alkaline ceramidase 3                                                        | 3.29 | 2.68 | 0.00 |
| A_51_P178872 | NM_027412 | Ttc9c   | 70387  | tetratricopeptide repeat domain 9C                                           | 2.70 | 2.68 | 0.00 |
| A_51_P241861 | NM_016921 | Tcirg1  | 27060  | T-cell, immune regulator 1, ATPase, H+ transporting, lysosomal V0 protein A3 | 2.90 | 2.67 | 0.00 |
| A_52_P392674 | NM_019736 | Acot9   | 56360  | acyl-CoA thioesterase 9                                                      | 3.21 | 2.67 | 0.00 |
| A_52_P565015 | NA        | NA      | NA     | NA                                                                           | 1.51 | 2.67 | 0.40 |
| A_52_P214573 | AK003980  | Lysmd3  | 80289  | LysM, putative peptidoglycan-binding, domain containing 3                    | 2.14 | 2.67 | 0.02 |
| A_52_P630059 | AJ250687  | Bag3    | 29810  | BCL2-associated athanogene 3                                                 | 2.97 | 2.67 | 0.00 |
| A_52_P367034 | NM_030684 | Trim34  | 94094  | tripartite motif-containing 34                                               | 2.03 | 2.67 | 0.04 |
| A_52_P16472  | NM_019643 | Fam60a  | 56306  | family with sequence similarity 60, member A                                 | 2.86 | 2.67 | 0.00 |
| A_51_P385993 | NM_009045 | Rela    | 19697  | v-rel reticuloendotheliosis viral oncogene homolog A (avian)                 | 3.65 | 2.67 | 0.00 |
| A_52_P464962 | AK086138  | Rbm5    | 83486  | RNA binding motif protein 5                                                  | 1.52 | 2.67 | 0.40 |
| A_52_P104761 | NM_011276 | Rlim    | 19820  | ring finger protein, LIM domain interacting                                  | 3.50 | 2.66 | 0.00 |
| A_52_P353905 | NA        | NA      | NA     | NA                                                                           | 3.17 | 2.66 | 0.00 |
| A_52_P395083 | AK156874  | NA      | NA     | NA                                                                           | 3.05 | 2.66 | 0.00 |
| A_52_P428599 | NM_145126 | Chi3l4  | 104183 | chitinase 3-like 4                                                           | 1.89 | 2.66 | 0.07 |

|              |            |           |        |                                                                                                          |      |      |      |
|--------------|------------|-----------|--------|----------------------------------------------------------------------------------------------------------|------|------|------|
| A_52_P280832 | NM_183035  | Defb34    | 360211 | defensin beta 34<br>transducin-like enhancer of split 1, homolog of                                      | 2.52 | 2.66 | 0.00 |
| A_51_P199716 | U61362     | Tle1      | 21885  | Drosophila E(spl)                                                                                        | 2.24 | 2.66 | 0.01 |
| A_52_P210893 | NM_019980  | Litaf     | 56722  | LPS-induced TN factor                                                                                    | 2.32 | 2.66 | 0.01 |
| A_52_P432580 | BC082312   | Arid5b    | 71371  | AT rich interactive domain 5B (MRF1-like)                                                                | 2.08 | 2.66 | 0.03 |
| A_51_P359636 | NM_011150  | Lgals3bp  | 19039  | lectin, galactoside-binding, soluble, 3 binding protein                                                  | 3.46 | 2.66 | 0.00 |
| A_52_P361551 | NM_015765  | Hspa14    | 50497  | heat shock protein 14                                                                                    | 2.90 | 2.65 | 0.00 |
| A_51_P366550 | BC064447   | Whsc1l1   | 234135 | Wolf-Hirschhorn syndrome candidate 1-like 1 (human)                                                      | 2.74 | 2.65 | 0.00 |
| A_52_P482063 | AK076230   | Tra2a     | 101214 | transformer 2 alpha homolog (Drosophila)                                                                 | 2.67 | 2.65 | 0.00 |
| A_51_P480241 | NM_007921  | Elf3      | 13710  | E74-like factor 3                                                                                        | 2.85 | 2.65 | 0.00 |
| A_51_P161362 | NM_145552  | Gnl2      | 230737 | guanine nucleotide binding protein-like 2 (nucleolar)<br>SPT2, Suppressor of Ty, domain containing 1 (S. | 2.67 | 2.65 | 0.00 |
| A_51_P375509 | NM_175318  | Spty2d1   | 101685 | cerevisiae)                                                                                              | 3.07 | 2.65 | 0.00 |
| A_51_P516861 | AK122234   | Rapgef5   | 217944 | Rap guanine nucleotide exchange factor (GEF) 5                                                           | 1.76 | 2.64 | 0.13 |
| A_52_P229770 | XM_133543  | Akap13    | 75547  | A kinase (PRKA) anchor protein 13                                                                        | 3.22 | 2.64 | 0.00 |
| A_52_P320044 | XM_898838  | NA        | NA     | NA                                                                                                       | 2.27 | 2.64 | 0.01 |
| A_52_P527500 | NM_080446  | Helb      | 117599 | helicase (DNA) B                                                                                         | 3.26 | 2.64 | 0.00 |
| A_51_P511691 | NM_025976  | Bfar      | 67118  | bifunctional apoptosis regulator                                                                         | 2.88 | 2.64 | 0.00 |
| A_51_P168762 | NM_178589  | Tnfrsf21  | 94185  | tumor necrosis factor receptor superfamily, member 21                                                    | 3.05 | 2.64 | 0.00 |
| A_51_P496273 | NM_023502  | Elf2      | 69257  | E74-like factor 2                                                                                        | 2.84 | 2.64 | 0.00 |
| A_52_P315421 | NM_001045! | NA        | NA     | NA                                                                                                       | 1.48 | 2.64 | 0.46 |
| A_52_P222230 | AK040896   | NA        | NA     | NA                                                                                                       | 1.94 | 2.64 | 0.05 |
| A_51_P299527 | AJ132857   | BC014805  | 236149 | cDNA sequence BC014805                                                                                   | 2.15 | 2.64 | 0.02 |
| A_51_P212515 | NM_178726  | Ppm1l     | 242083 | protein phosphatase 1 (formerly 2C)-like                                                                 | 3.22 | 2.64 | 0.00 |
| A_52_P522166 | BU509931   | 2810026P1 | 72655  | RIKEN cDNA 2810026P18 gene                                                                               | 3.02 | 2.64 | 0.00 |
| A_52_P318438 | NM_008667  | Nab1      | 17936  | Ngfi-A binding protein 1                                                                                 | 2.34 | 2.63 | 0.01 |
| A_51_P475646 | NA         | NA        | NA     | NA                                                                                                       | 2.88 | 2.63 | 0.00 |
| A_51_P416689 | NM_010162  | Ext1      | 14042  | exostoses (multiple) 1                                                                                   | 2.66 | 2.63 | 0.00 |
| A_51_P520384 | NM_007502  | Atp1b3    | 11933  | ATPase, Na <sup>+</sup> /K <sup>+</sup> transporting, beta 3 polypeptide                                 | 2.82 | 2.63 | 0.00 |
| A_52_P652999 | NM_178362  | Sorbs1    | 20411  | sorbin and SH3 domain containing 1                                                                       | 3.05 | 2.62 | 0.00 |

|              |           |           |        |                                                                                                                   |      |      |      |
|--------------|-----------|-----------|--------|-------------------------------------------------------------------------------------------------------------------|------|------|------|
| A_52_P605319 | NM_199148 | BC051665  | 218275 | cDNA sequence BC051665                                                                                            | 1.90 | 2.62 | 0.06 |
| A_51_P228073 | AK041075  | Susd1     | 634731 | sushi domain containing 1<br>TPX2, microtubule-associated protein homolog<br>(Xenopus laevis)                     | 2.84 | 2.62 | 0.00 |
| A_51_P369200 | NM_028109 | Tpx2      | 72119  |                                                                                                                   | 1.90 | 2.62 | 0.06 |
| A_52_P675395 | NM_007722 | Cxcr7     | 12778  | chemokine (C-X-C motif) receptor 7                                                                                | 2.82 | 2.62 | 0.00 |
| A_51_P321331 | NM_011479 | Sptlc2    | 20773  | serine palmitoyltransferase, long chain base subunit 2                                                            | 2.76 | 2.62 | 0.00 |
| A_52_P544052 | NM_001001 | Baz2b     | 407823 | bromodomain adjacent to zinc finger domain, 2B                                                                    | 3.38 | 2.62 | 0.00 |
| A_52_P87713  | NM_001044 | Timp1     | 21857  | tissue inhibitor of metalloproteinase 1                                                                           | 2.82 | 2.61 | 0.00 |
| A_51_P262238 | NM_021885 | Tub       | 22141  | tubby candidate gene                                                                                              | 2.31 | 2.61 | 0.01 |
| A_52_P13783  | AK028922  | 4930523C0 | 67647  | RIKEN cDNA 4930523C07 gene<br>phospholipase A2, group VII (platelet-activating factor<br>acetylhydrolase, plasma) | 2.47 | 2.61 | 0.00 |
| A_51_P447835 | NM_013737 | Pla2g7    | 27226  |                                                                                                                   | 1.99 | 2.61 | 0.04 |
| A_52_P391103 | NM_013498 | Crem      | 12916  | cAMP responsive element modulator                                                                                 | 2.12 | 2.61 | 0.02 |
| A_51_P513392 | NM_013727 | Azi2      | 27215  | 5-azacytidine induced gene 2                                                                                      | 2.84 | 2.61 | 0.00 |
| A_52_P356204 | NM_181547 | Nostrin   | 329416 | nitric oxide synthase trafficker                                                                                  | 2.46 | 2.61 | 0.00 |
| A_51_P374651 | BC065123  | Baz1a     | 217578 | bromodomain adjacent to zinc finger domain 1A                                                                     | 2.30 | 2.61 | 0.01 |
| A_51_P141546 | NM_011016 | Orm2      | 18406  | orosomuroid 2                                                                                                     | 2.24 | 2.61 | 0.01 |
| A_52_P448648 | NM_021411 | Rab37     | 58222  | RAB37, member of RAS oncogene family                                                                              | 2.60 | 2.60 | 0.00 |
| A_52_P317356 | XM_900563 | NA        | NA     | NA                                                                                                                | 2.65 | 2.60 | 0.00 |
| A_52_P686095 | AK046888  | Acer2     | 230379 | alkaline ceramidase 2                                                                                             | 2.45 | 2.60 | 0.01 |
| A_52_P563475 | NM_026160 | Map1lc3b  | 67443  | microtubule-associated protein 1 light chain 3 beta                                                               | 3.32 | 2.60 | 0.00 |
| A_52_P189038 | AK161102  | Rbms1     | 56878  | RNA binding motif, single stranded interacting protein 1                                                          | 2.26 | 2.60 | 0.01 |
| A_52_P663585 | NM_001024 | 10-Sep    | 103080 | septin 10                                                                                                         | 2.99 | 2.60 | 0.00 |
| A_51_P200339 | NM_198037 | Cachd1    | 320508 | cache domain containing 1                                                                                         | 2.72 | 2.60 | 0.00 |
| A_52_P229271 | NM_027869 | Pnpt1     | 71701  | polyribonucleotide nucleotidyltransferase 1                                                                       | 2.86 | 2.59 | 0.00 |
| A_52_P546635 | NM_011546 | Zeb1      | 21417  | zinc finger E-box binding homeobox 1                                                                              | 2.72 | 2.59 | 0.00 |
| A_51_P352924 | NM_010193 | Fem1b     | 14155  | feminization 1 homolog b (C. elegans)                                                                             | 3.04 | 2.59 | 0.00 |
| A_52_P49945  | NM_146239 | Cdk17     | 237459 | cyclin-dependent kinase 17                                                                                        | 2.56 | 2.59 | 0.00 |
| A_52_P269717 | NA        | NA        | NA     | NA                                                                                                                | 2.78 | 2.59 | 0.00 |
| A_52_P356562 | NA        | NA        | NA     | NA                                                                                                                | 2.95 | 2.59 | 0.00 |



|              |           |           |         |                                                                                                                    |      |      |      |
|--------------|-----------|-----------|---------|--------------------------------------------------------------------------------------------------------------------|------|------|------|
| A_51_P133562 | NM_007618 | Serpina6  | 12401   | serine (or cysteine) peptidase inhibitor, clade A, member 6                                                        | 2.86 | 2.59 | 0.00 |
| A_51_P230507 | NM_138953 | Ell2      | 192657  | elongation factor RNA polymerase II 2                                                                              | 2.08 | 2.59 | 0.03 |
| A_52_P526565 | NM_016744 | Pde1a     | 18573   | phosphodiesterase 1A, calmodulin-dependent                                                                         | 2.51 | 2.59 | 0.00 |
| A_52_P174915 | NM_010288 | Gja1      | 14609   | gap junction protein, alpha 1                                                                                      | 2.33 | 2.58 | 0.01 |
| A_52_P290544 | BC007177  | Ccn1      | 56706   | cyclin L1                                                                                                          | 2.56 | 2.58 | 0.00 |
| A_52_P250268 | AK034769  | 9430034N1 | 1320811 | RIKEN cDNA 9430034N14 gene                                                                                         | 2.93 | 2.58 | 0.00 |
| A_51_P369371 | NM_145500 | Ubt1      | 226122  | ubiquitin domain containing 1                                                                                      | 3.48 | 2.58 | 0.00 |
| A_52_P311491 | BC060722  | Ibtk      | 108837  | inhibitor of Bruton agammaglobulinemia tyrosine kinase a disintegrin and metallopeptidase domain 9 (meltrin gamma) | 2.83 | 2.57 | 0.00 |
| A_51_P518378 | NM_007404 | Adam9     | 11502   |                                                                                                                    | 3.11 | 2.57 | 0.00 |
| A_51_P364632 | NM_011893 | Sh3bp2    | 24055   | SH3-domain binding protein 2                                                                                       | 2.42 | 2.57 | 0.01 |
| A_52_P592828 | NM_001024 | Adarb1    | 110532  | adenosine deaminase, RNA-specific, B1                                                                              | 2.68 | 2.57 | 0.00 |
| A_52_P205255 | BC054536  | Adam11    | 11488   | a disintegrin and metallopeptidase domain 11                                                                       | 1.60 | 2.57 | 0.27 |
| A_52_P531662 | NM_027412 | Ttc9c     | 70387   | tetratricopeptide repeat domain 9C                                                                                 | 1.99 | 2.56 | 0.04 |
| A_52_P451834 | NM_183262 | Stk35     | 67333   | serine/threonine kinase 35                                                                                         | 2.62 | 2.56 | 0.00 |
| A_51_P433000 | AK008733  | Chmp4c    | 66371   | chromatin modifying protein 4C                                                                                     | 2.32 | 2.56 | 0.01 |
| A_51_P475573 | NM_010336 | Lpar1     | 14745   | lysophosphatidic acid receptor 1                                                                                   | 2.21 | 2.56 | 0.01 |
| A_51_P363258 | NM_133731 | Prss22    | 70835   | protease, serine, 22                                                                                               | 3.07 | 2.56 | 0.00 |
| A_51_P337675 | NM_007651 | Cd53      | 12508   | CD53 antigen                                                                                                       | 2.48 | 2.56 | 0.00 |
| A_52_P235476 | NM_001077 | Pik3r1    | 18708   | phosphatidylinositol 3-kinase, regulatory subunit, polypeptide 1 (p85 alpha)                                       | 2.77 | 2.56 | 0.00 |
| A_52_P275324 | AK050568  | Rbm39     | 170791  | RNA binding motif protein 39                                                                                       | 2.44 | 2.56 | 0.01 |
| A_51_P445166 | NM_019959 | C1qtnf1   | 56745   | C1q and tumor necrosis factor related protein 1                                                                    | 3.53 | 2.56 | 0.00 |
| A_51_P188782 | NM_133777 | Ube2s     | 77891   | ubiquitin-conjugating enzyme E2S                                                                                   | 2.08 | 2.55 | 0.03 |
| A_51_P494196 | U14333    | Arnt      | 11863   | aryl hydrocarbon receptor nuclear translocator                                                                     | 2.86 | 2.55 | 0.00 |
| A_51_P410387 | NM_177820 | Apol10b   | 328561  | apolipoprotein L 10b                                                                                               | 2.13 | 2.55 | 0.02 |
| A_51_P256771 | NM_009016 | Raet1a    | 19368   | retinoic acid early transcript 1, alpha                                                                            | 1.76 | 2.55 | 0.13 |
| A_51_P261051 | NM_010056 | Dlx5      | 13395   | distal-less homeobox 5                                                                                             | 1.56 | 2.55 | 0.33 |
| A_52_P384916 | AK136384  | Nfkbiz    | 80859   | nuclear factor of kappa light polypeptide gene enhancer in B-cells inhibitor, zeta                                 | 2.73 | 2.55 | 0.00 |
| A_52_P525183 | NM_134188 | Acot2     | 171210  | acyl-CoA thioesterase 2                                                                                            | 1.76 | 2.55 | 0.13 |
| A_52_P624648 | Y14041    | Cflar     | 12633   | CASP8 and FADD-like apoptosis regulator                                                                            | 2.54 | 2.55 | 0.00 |

|              |           |           |        |                                                                                                               |      |      |      |
|--------------|-----------|-----------|--------|---------------------------------------------------------------------------------------------------------------|------|------|------|
| A_52_P474294 | NM_027711 | Iqgap2    | 544963 | IQ motif containing GTPase activating protein 2                                                               | 2.55 | 2.55 | 0.00 |
| A_51_P483351 | NA        | NA        | NA     | NA                                                                                                            | 3.49 | 2.55 | 0.00 |
| A_51_P508602 | NM_009341 | Tcp10c    | 21462  | t-complex protein 10c                                                                                         | 3.34 | 2.54 | 0.00 |
| A_51_P262964 | NM_007904 | Ednrb     | 13618  | endothelin receptor type B<br>serine (or cysteine) peptidase inhibitor, clade A (alpha-1                      | 1.82 | 2.54 | 0.10 |
| A_52_P662025 | NM_144834 | Serpina10 | 217847 | antiproteinase, antitrypsin), member 10                                                                       | 2.23 | 2.54 | 0.01 |
| A_51_P276142 | NM_134438 | Gpr37l1   | 171469 | G protein-coupled receptor 37-like 1                                                                          | 2.24 | 2.54 | 0.01 |
| A_52_P9703   | NM_009997 | Cyp2a4    | 13086  | cytochrome P450, family 2, subfamily a, polypeptide 4                                                         | 1.39 | 2.54 | 0.67 |
| A_52_P49406  | NM_178668 | Pde12     | 211948 | phosphodiesterase 12                                                                                          | 2.11 | 2.54 | 0.02 |
| A_51_P137452 | NM_013809 | Cyp2g1    | 13108  | cytochrome P450, family 2, subfamily g, polypeptide 1<br>v-rel reticuloendotheliosis viral oncogene homolog A | 1.98 | 2.54 | 0.04 |
| A_52_P186119 | NM_009045 | Rela      | 19697  | (avian)                                                                                                       | 3.06 | 2.54 | 0.00 |
| A_51_P330331 | NM_007807 | Cybb      | 13058  | cytochrome b-245, beta polypeptide                                                                            | 2.28 | 2.54 | 0.01 |
| A_51_P305583 | BC069183  | Sp100     | 20684  | nuclear antigen Sp100                                                                                         | 3.27 | 2.54 | 0.00 |
| A_52_P627816 | NM_019984 | Tgm1      | 21816  | transglutaminase 1, K polypeptide                                                                             | 1.80 | 2.54 | 0.11 |
| A_51_P236846 | NM_010171 | F3        | 14066  | coagulation factor III                                                                                        | 2.35 | 2.54 | 0.01 |
| A_51_P504490 | NM_172762 | Rbm34     | 52202  | RNA binding motif protein 34                                                                                  | 3.16 | 2.54 | 0.00 |
| A_52_P414464 | NM_207649 | Rcan2     | 53901  | regulator of calcineurin 2                                                                                    | 2.19 | 2.54 | 0.02 |
| A_51_P378856 | NM_019703 | Pfkp      | 56421  | phosphofructokinase, platelet                                                                                 | 2.48 | 2.53 | 0.00 |
| A_52_P213932 | NM_009621 | Adamts1   | 11504  | a disintegrin-like and metallopeptidase (reprolysin type)<br>with thrombospondin type 1 motif, 1              | 3.19 | 2.53 | 0.00 |
| A_51_P249793 | NM_175118 | Dusp28    | 67446  | dual specificity phosphatase 28                                                                               | 2.51 | 2.53 | 0.00 |
| A_51_P288906 | NM_019765 | Clip1     | 56430  | CAP-GLY domain containing linker protein 1                                                                    | 2.94 | 2.53 | 0.00 |
| A_51_P156882 | NM_001024 | Adarb1    | 110532 | adenosine deaminase, RNA-specific, B1                                                                         | 2.21 | 2.53 | 0.01 |
| A_51_P126177 | NM_026160 | Map1lc3b  | 67443  | microtubule-associated protein 1 light chain 3 beta                                                           | 2.89 | 2.53 | 0.00 |
| A_51_P247799 | NM_009812 | Casp8     | 12370  | caspase 8                                                                                                     | 2.44 | 2.52 | 0.01 |
| A_51_P346214 | NM_013529 | Gfpt2     | 14584  | glutamine fructose-6-phosphate transaminase 2                                                                 | 2.42 | 2.52 | 0.01 |
| A_51_P419286 | NM_030060 | Batf3     | 381319 | basic leucine zipper transcription factor, ATF-like 3                                                         | 2.66 | 2.52 | 0.00 |
| A_52_P671812 | XM_918536 | LOC641192 | 641192 | similar to heat shock protein 8                                                                               | 2.19 | 2.52 | 0.01 |

|               |           |           |        |                                                           |      |      |      |
|---------------|-----------|-----------|--------|-----------------------------------------------------------|------|------|------|
| A_52_P373961  | XM_129972 | NA        | NA     | NA                                                        | 2.90 | 2.52 | 0.00 |
| A_52_P96782   | NM_028459 | Wasl      | 73178  | Wiskott-Aldrich syndrome-like (human)                     | 2.71 | 2.52 | 0.00 |
| A_52_P465669  | NA        | NA        | NA     | NA                                                        | 1.59 | 2.52 | 0.27 |
| A_52_P226929  | NM_207653 | Cflar     | 12633  | CASP8 and FADD-like apoptosis regulator                   | 2.83 | 2.51 | 0.00 |
| A_52_P1061446 | XM_885873 | Baz1a     | 217578 | bromodomain adjacent to zinc finger domain 1A             | 3.14 | 2.51 | 0.00 |
| A_51_P476018  | NM_011446 | Sox7      | 20680  | SRY-box containing gene 7                                 | 3.02 | 2.51 | 0.00 |
|               |           |           |        | DNA segment, Chr 4, Brigham & Women's Genetics            |      |      |      |
| A_51_P172131  | NM_026821 | D4Bwg095  | 52829  | 0951 expressed                                            | 2.23 | 2.51 | 0.01 |
| A_51_P224227  | XM_900563 | NA        | NA     | NA                                                        | 2.57 | 2.51 | 0.00 |
| A_51_P511102  | NM_030249 | Cttnbp2nl | 80281  | CTTNBP2 N-terminal like                                   | 2.76 | 2.51 | 0.00 |
| A_52_P577338  | NM_001025 | Lrig2     | 269473 | leucine-rich repeats and immunoglobulin-like domains 2    | 2.08 | 2.51 | 0.03 |
| A_52_P442722  | BC058699  | Nol8      | 70930  | nucleolar protein 8                                       | 2.32 | 2.51 | 0.01 |
| A_52_P306965  | BC020078  | Xdh       | 22436  | xanthine dehydrogenase                                    | 1.64 | 2.51 | 0.21 |
| A_51_P308309  | NM_172958 | Mtmr12    | 268783 | myotubularin related protein 12                           | 2.47 | 2.50 | 0.00 |
| A_52_P477286  | NM_173413 | Rab8b     | 235442 | RAB8B, member RAS oncogene family                         | 2.02 | 2.50 | 0.04 |
|               |           |           |        | valosin containing protein (p97)/p47 complex              |      |      |      |
| A_52_P210206  | AK031819  | Vcpip1    | 70675  | interacting protein 1                                     | 3.16 | 2.50 | 0.00 |
| A_52_P385536  | AK049305  | Ddx58     | 230073 | DEAD (Asp-Glu-Ala-Asp) box polypeptide 58                 | 2.48 | 2.50 | 0.00 |
| A_52_P650028  | XM_891407 | Dock10    | 210293 | dedicator of cytokinesis 10                               | 2.27 | 2.50 | 0.01 |
| A_51_P261689  | AK003078  | Ube2s     | 77891  | ubiquitin-conjugating enzyme E2S                          | 2.07 | 2.50 | 0.03 |
|               |           |           |        | solute carrier family 11 (proton-coupled divalent metal   |      |      |      |
| A_52_P254298  | NM_008732 | Slc11a2   | 18174  | ion transporters), member 2                               | 3.17 | 2.50 | 0.00 |
|               |           |           |        | a disintegrin-like and metallopeptidase (reprolysin type) |      |      |      |
| A_52_P400831  | NM_001001 | Adamts13  | 279028 | with thrombospondin type 1 motif, 13                      | 1.84 | 2.49 | 0.09 |
| A_52_P353031  | NM_001025 | Trim26    | 22670  | tripartite motif-containing 26                            | 2.85 | 2.49 | 0.00 |
|               |           |           |        | a disintegrin-like and metallopeptidase (reprolysin type) |      |      |      |
| A_51_P250597  | AK041395  | Adamts6   | 108154 | with thrombospondin type 1 motif, 6                       | 1.96 | 2.49 | 0.04 |
| A_52_P436258  | NM_007569 | Btg1      | 12226  | B-cell translocation gene 1, anti-proliferative           | 1.96 | 2.49 | 0.04 |
| A_51_P462153  | NM_022314 | Tpm3      | 59069  | tropomyosin 3, gamma                                      | 2.13 | 2.49 | 0.02 |
| A_51_P271897  | NA        | NA        | NA     | NA                                                        | 3.16 | 2.49 | 0.00 |
| A_52_P170620  | NM_175934 | Ppp1r10   | 52040  | protein phosphatase 1, regulatory subunit 10              | 1.82 | 2.49 | 0.10 |

|               |           |           |        |                                                                          |      |      |      |
|---------------|-----------|-----------|--------|--------------------------------------------------------------------------|------|------|------|
| A_51_P502724  | XM_283903 | Fam102b   | 329739 | family with sequence similarity 102, member B                            | 2.27 | 2.48 | 0.01 |
| A_52_P288873  | NM_029362 | Chmp4b    | 75608  | chromatin modifying protein 4B                                           | 2.84 | 2.48 | 0.00 |
| A_52_P395149  | NM_177776 | Smtnl2    | 276829 | smoothelin-like 2                                                        | 1.78 | 2.48 | 0.12 |
| A_51_P374533  | NM_146338 | Olfr374   | 258335 | olfactory receptor 374                                                   | 1.81 | 2.48 | 0.11 |
| A_51_P417839  | NM_207225 | Hdac4     | 208727 | histone deacetylase 4                                                    | 3.10 | 2.47 | 0.00 |
| A_51_P188126  | NM_145523 | Gca       | 227960 | grancalcin                                                               | 2.60 | 2.47 | 0.00 |
| A_51_P271704  | NM_028044 | Cnn3      | 71994  | calponin 3, acidic                                                       | 2.79 | 2.47 | 0.00 |
| A_52_P440881  | BC048860  | Naa25     | 231713 | N(alpha)-acetyltransferase 25, NatB auxiliary subunit                    | 2.37 | 2.47 | 0.01 |
| A_51_P236234  | NM_011346 | Sell      | 20343  | selectin, lymphocyte                                                     | 2.01 | 2.47 | 0.04 |
| A_51_P142861  | NM_009807 | Casp1     | 12362  | caspase 1                                                                | 2.35 | 2.47 | 0.01 |
| A_51_P482925  | NM_175363 | Pphln1    | 223828 | periphilin 1                                                             | 2.95 | 2.47 | 0.00 |
| A_51_P450278  | NM_027237 | 2010003K1 | 69861  | RIKEN cDNA 2010003K11 gene                                               | 2.61 | 2.47 | 0.00 |
| A_52_P574653  | NM_007544 | Bid       | 12122  | BH3 interacting domain death agonist                                     | 2.88 | 2.47 | 0.00 |
| A_51_P223396  | NM_025782 | NA        | NA     | NA                                                                       | 2.99 | 2.47 | 0.00 |
| A_52_P491507  | NM_008576 | Abcc1     | 17250  | ATP-binding cassette, sub-family C (CFTR/MRP), member 1                  | 3.22 | 2.47 | 0.00 |
| A_51_P293127  | NM_173399 | Zbtb5     | 230119 | zinc finger and BTB domain containing 5                                  | 2.77 | 2.47 | 0.00 |
| A_52_P559618  | NM_030694 | Ifitm2    | 80876  | interferon induced transmembrane protein 2                               | 2.38 | 2.47 | 0.01 |
| A_52_P323503  | NA        | NA        | NA     | NA                                                                       | 2.18 | 2.47 | 0.02 |
| A_51_P365189  | NM_133990 | Il13ra1   | 16164  | interleukin 13 receptor, alpha 1                                         | 2.50 | 2.47 | 0.00 |
| A_52_P500711  | NA        | NA        | NA     | NA                                                                       | 1.52 | 2.47 | 0.40 |
| A_52_P203691  | NM_207231 | Arl5c     | 217151 | ADP-ribosylation factor-like 5C                                          | 2.78 | 2.47 | 0.00 |
| A_52_P55834   | NM_022329 | Tor1aip2  | 240832 | torsin A interacting protein 2                                           | 2.86 | 2.46 | 0.00 |
| A_52_P586004  | NM_001033 | Hk3       | 212032 | hexokinase 3                                                             | 2.33 | 2.46 | 0.01 |
| A_52_P5855    | AK049452  | Egfr      | 13649  | epidermal growth factor receptor                                         | 2.37 | 2.46 | 0.01 |
| A_51_P295442  | NM_021605 | Nek7      | 59125  | NIMA (never in mitosis gene a)-related expressed kinase 7                | 2.76 | 2.46 | 0.00 |
| A_51_P371710  | NM_133211 | Tlr7      | 170743 | toll-like receptor 7                                                     | 1.94 | 2.46 | 0.05 |
| A_52_P106620  | NM_008764 | Tnfrsf11b | 18383  | tumor necrosis factor receptor superfamily, member 11b (osteoprotegerin) | 2.35 | 2.46 | 0.01 |
| A_51_P3335650 | NM_016888 | B3gnt2    | 53625  | UDP-GlcNAc:betaGal beta-1,3-N-acetylglucosaminyltransferase 2            | 1.93 | 2.45 | 0.05 |
| A_51_P283708  | NM_008628 | Msh2      | 17685  | mutS homolog 2 (E. coli)                                                 | 2.35 | 2.45 | 0.01 |

|               |                    |        |                                                                           |      |      |      |
|---------------|--------------------|--------|---------------------------------------------------------------------------|------|------|------|
| A_52_P119814  | NM_001004: Slc13a5 | 237831 | solute carrier family 13 (sodium-dependent citrate transporter), member 5 | 2.75 | 2.45 | 0.00 |
| A_51_P291347  | NM_013614 Odc1     | 18263  | ornithine decarboxylase, structural 1                                     | 2.58 | 2.45 | 0.00 |
| A_52_P683413  | NM_010171 F3       | 14066  | coagulation factor III                                                    | 2.32 | 2.44 | 0.01 |
| A_52_P1133703 | AA204140 Cd47      | 16423  | CD47 antigen (Rh-related antigen, integrin-associated signal transducer)  | 1.92 | 2.44 | 0.06 |
| A_51_P456952  | NM_013563 Il2rg    | 16186  | interleukin 2 receptor, gamma chain                                       | 2.09 | 2.44 | 0.03 |
| A_52_P267564  | NM_172728 Creb5    | 231991 | cAMP responsive element binding protein 5                                 | 2.45 | 2.44 | 0.01 |
| A_52_P328423  | NA NA              | NA     | NA                                                                        | 2.48 | 2.44 | 0.00 |
| A_51_P207921  | NM_008898 Por      | 18984  | P450 (cytochrome) oxidoreductase                                          | 2.69 | 2.44 | 0.00 |
| A_51_P242585  | NM_181590 Shq1     | 72171  | SHQ1 homolog ( <i>S. cerevisiae</i> )                                     | 2.73 | 2.44 | 0.00 |
| A_51_P196629  | XM_283903 Fam102b  | 329739 | family with sequence similarity 102, member B                             | 2.34 | 2.44 | 0.01 |
| A_52_P600600  | NM_201600 Myo5b    | 17919  | myosin VB                                                                 | 2.09 | 2.44 | 0.03 |
| A_52_P156158  | NM_024478 Grpel1   | 17713  | GrpE-like 1, mitochondrial                                                | 2.15 | 2.43 | 0.02 |
| A_51_P162794  | NM_010370 Gzma     | 14938  | granzyme A                                                                | 2.01 | 2.43 | 0.04 |
| A_52_P380329  | NM_198600 Papd7    | 210106 | PAP associated domain containing 7                                        | 2.88 | 2.43 | 0.00 |
| A_51_P199927  | NM_133878 Rcc1     | 100088 | regulator of chromosome condensation 1                                    | 1.55 | 2.43 | 0.34 |
| A_52_P54261   | NM_178936 Tmem56   | 99887  | transmembrane protein 56                                                  | 1.87 | 2.43 | 0.07 |
| A_51_P380165  | NM_029337 Ep400    | 75560  | E1A binding protein p400                                                  | 2.22 | 2.43 | 0.01 |
| A_51_P473919  | BC022619 Mycbp2    | 105689 | MYC binding protein 2                                                     | 2.25 | 2.43 | 0.01 |
| A_51_P149946  | NM_175094 Pdhx     | 27402  | pyruvate dehydrogenase complex, component X                               | 2.41 | 2.42 | 0.01 |
| A_52_P520564  | NM_028459 Wasl     | 73178  | Wiskott-Aldrich syndrome-like (human)                                     | 2.57 | 2.42 | 0.00 |
| A_52_P99848   | NM_008840 Pik3cd   | 18707  | phosphatidylinositol 3-kinase catalytic delta polypeptide                 | 2.61 | 2.42 | 0.00 |
| A_51_P443344  | NM_029344 Acyp2    | 75572  | acylphosphatase 2, muscle type                                            | 2.00 | 2.42 | 0.04 |
| A_51_P430766  | NM_010548 Il10     | 16153  | interleukin 10                                                            | 1.99 | 2.42 | 0.04 |
| A_52_P412167  | NM_080467 Atp6v0a4 | 140494 | ATPase, H <sup>+</sup> transporting, lysosomal V0 subunit A4              | 2.73 | 2.42 | 0.00 |
| A_51_P472531  | NM_029847 Arsk     | 77041  | arylsulfatase K                                                           | 1.62 | 2.42 | 0.24 |
| A_51_P187750  | NM_153408 Neurl3   | 214854 | neuralized homolog 3 homolog ( <i>Drosophila</i> )                        | 2.65 | 2.42 | 0.00 |
| A_52_P665979  | XM_900176 NA       | NA     | NA                                                                        | 2.39 | 2.41 | 0.01 |
| A_52_P46102   | NM_001009: Pde1a   | 18573  | phosphodiesterase 1A, calmodulin-dependent                                | 3.35 | 2.41 | 0.00 |
| A_52_P522157  | BC032970 2810026P1 | 72655  | RIKEN cDNA 2810026P18 gene                                                | 1.88 | 2.41 | 0.07 |
| A_52_P7041    | NM_013614 Odc1     | 18263  | ornithine decarboxylase, structural 1                                     | 2.59 | 2.41 | 0.00 |
| A_51_P517105  | NM_012054 Aoah     | 27052  | acyloxyacyl hydrolase                                                     | 2.82 | 2.41 | 0.00 |

|              |           |           |        |                                                                                                          |      |      |      |
|--------------|-----------|-----------|--------|----------------------------------------------------------------------------------------------------------|------|------|------|
| A_52_P320945 | NM_172734 | Stk38l    | 232533 | serine/threonine kinase 38 like                                                                          | 1.73 | 2.41 | 0.15 |
| A_52_P289893 | NM_181650 | Prdm4     | 72843  | PR domain containing 4                                                                                   | 3.04 | 2.41 | 0.00 |
| A_52_P361899 | XM_001001 | Gm8818    | 667795 | predicted gene 8818                                                                                      | 2.49 | 2.41 | 0.00 |
| A_52_P602292 | XM_914954 | Gm270     | 667488 | predicted gene 270                                                                                       | 1.33 | 2.41 | 0.86 |
| A_52_P502267 | NM_172663 | Epc2      | 227867 | enhancer of polycomb homolog 2 (Drosophila)                                                              | 3.17 | 2.41 | 0.00 |
| A_52_P669035 | NM_009899 | Clca1     | 12722  | chloride channel calcium activated 1                                                                     | 2.72 | 2.41 | 0.00 |
| A_51_P193852 | NM_027297 | Prpf4     | 70052  | PRP4 pre-mRNA processing factor 4 homolog (yeast)                                                        | 2.11 | 2.40 | 0.02 |
| A_51_P242591 | AK012978  | Shq1      | 72171  | SHQ1 homolog (S. cerevisiae)                                                                             | 2.61 | 2.40 | 0.00 |
| A_51_P259459 | NM_010908 | Nfkbib    | 18036  | nuclear factor of kappa light polypeptide gene enhancer in B-cells inhibitor, beta                       | 3.36 | 2.40 | 0.00 |
| A_51_P327016 | NM_016744 | Pde1a     | 18573  | phosphodiesterase 1A, calmodulin-dependent                                                               | 2.51 | 2.40 | 0.00 |
| A_52_P680436 | NM_025793 | Wdr45l    | 66840  | Wdr45 like                                                                                               | 2.54 | 2.40 | 0.00 |
| A_51_P500215 | NM_173743 | Apol9b    | 71898  | apolipoprotein L 9b                                                                                      | 2.13 | 2.40 | 0.02 |
| A_52_P105501 | NM_022885 | Slc30a5   | 69048  | solute carrier family 30 (zinc transporter), member 5                                                    | 2.36 | 2.39 | 0.01 |
| A_51_P145541 | NM_020296 | Rbms1     | 56878  | RNA binding motif, single stranded interacting protein 1                                                 | 2.45 | 2.39 | 0.01 |
| A_52_P188261 | NM_001025 | Camk2d    | 108058 | calcium/calmodulin-dependent protein kinase II, delta                                                    | 2.25 | 2.39 | 0.01 |
| A_51_P105879 | NM_201600 | Myo5b     | 17919  | myosin VB                                                                                                | 2.00 | 2.39 | 0.04 |
| A_52_P463235 | NM_027496 | Ankrd33b  | 67434  | ankyrin repeat domain 33B                                                                                | 1.62 | 2.39 | 0.22 |
| A_51_P279712 | NM_145923 | Rel1      | 100532 | RELT-like 1                                                                                              | 1.70 | 2.39 | 0.16 |
| A_51_P381618 | NM_134102 | Pla1a     | 85031  | phospholipase A1 member A                                                                                | 2.33 | 2.39 | 0.01 |
| A_51_P197146 | AK017886  | 5830400J0 | 74739  | RIKEN cDNA 5830400J07 gene                                                                               | 2.65 | 2.39 | 0.00 |
| A_51_P130057 | NM_175523 | Ppm1k     | 243382 | protein phosphatase 1K (PP2C domain containing) DEAD/H (Asp-Glu-Ala-Asp/His) box polypeptide 3, X-linked | 2.55 | 2.39 | 0.00 |
| A_51_P418420 | NM_010028 | Ddx3x     | 13205  | linked                                                                                                   | 2.55 | 2.38 | 0.00 |
| A_52_P671534 | AK037669  | Abhd8     | 64296  | abhydrolase domain containing 8                                                                          | 2.51 | 2.38 | 0.00 |
| A_52_P510987 | NM_175628 | A2m       | 232345 | alpha-2-macroglobulin                                                                                    | 1.31 | 2.38 | 0.97 |
| A_52_P609387 | AK044402  | AI848100  | 226551 | expressed sequence AI848100                                                                              | 2.40 | 2.38 | 0.01 |
| A_51_P183940 | NM_016866 | Stk39     | 53416  | serine/threonine kinase 39, STE20/SPS1 homolog (yeast)                                                   | 2.21 | 2.38 | 0.01 |

|               |           |           |        |                                                           |      |      |      |
|---------------|-----------|-----------|--------|-----------------------------------------------------------|------|------|------|
| A_51_P394324  | NM_207636 | Fndc3a    | 319448 | fibronectin type III domain containing 3A                 | 2.59 | 2.38 | 0.00 |
| A_51_P121891  | NM_009008 | Rac2      | 19354  | RAS-related C3 botulinum substrate 2                      | 2.30 | 2.38 | 0.01 |
| A_51_P433960  | NM_011890 | Sgcb      | 24051  | sarcoglycan, beta (dystrophin-associated glycoprotein)    | 2.06 | 2.38 | 0.03 |
| A_52_P599038  | NM_025976 | Bfar      | 67118  | bifunctional apoptosis regulator                          | 2.62 | 2.38 | 0.00 |
| A_52_P472936  | BC048817  | Ythdc1    | 231386 | YTH domain containing 1                                   | 2.45 | 2.38 | 0.01 |
| A_52_P141338  | NM_022816 | Acot10    | 64833  | acyl-CoA thioesterase 10                                  | 2.39 | 2.37 | 0.01 |
| A_52_P755824  | AK078024  | NA        | NA     | NA                                                        | 2.50 | 2.37 | 0.00 |
| A_51_P188141  | NM_008522 | Ltf       | 17002  | lactotransferrin                                          | 2.55 | 2.37 | 0.00 |
| A_52_P650307  | NM_178045 | Rassf4    | 213391 | Ras association (RalGDS/AF-6) domain family member 4      | 2.18 | 2.37 | 0.02 |
| A_51_P209873  | NM_024287 | Rab6      | 19346  | RAB6, member RAS oncogene family                          | 1.99 | 2.37 | 0.04 |
| A_51_P389895  | NM_028787 | Slc35f5   | 74150  | solute carrier family 35, member F5                       | 2.76 | 2.37 | 0.00 |
| A_52_P563860  | AK036870  | Nck1      | 17973  | non-catalytic region of tyrosine kinase adaptor protein 1 | 2.47 | 2.37 | 0.00 |
| A_51_P339962  | NM_027545 | Cwf19I2   | 244672 | CWF19-like 2, cell cycle control ( <i>S. pombe</i> )      | 2.87 | 2.37 | 0.00 |
| A_51_P241213  | AK020696  | A030005L1 | 77922  | RIKEN cDNA A030005L19 gene                                | 1.72 | 2.37 | 0.15 |
| A_52_P403484  | BC008269  | Ptpn2     | 19255  | protein tyrosine phosphatase, non-receptor type 2         | 2.95 | 2.37 | 0.00 |
| A_52_P279658  | NM_009817 | Cast      | 12380  | calpastatin                                               | 2.04 | 2.36 | 0.03 |
| A_52_P663526  | NM_145497 | BC016495  | 225994 | cDNA sequence BC016495                                    | 1.71 | 2.36 | 0.16 |
| A_52_P47846   | AF143181  | Fcgr1     | 14129  | Fc receptor, IgG, high affinity I                         | 2.29 | 2.36 | 0.01 |
| A_51_P375267  | U58884    | Dbnl      | 13169  | drebrin-like                                              | 2.57 | 2.36 | 0.00 |
| A_52_P1116002 | AK048761  | NA        | NA     | NA                                                        | 2.44 | 2.36 | 0.01 |
| A_51_P304876  | NM_033077 | D1Pas1    | 110957 | DNA segment, Chr 1, Pasteur Institute 1                   | 2.00 | 2.36 | 0.04 |
| A_51_P179864  | NM_016979 | Prkx      | 19108  | protein kinase, X-linked                                  | 2.82 | 2.36 | 0.00 |
| A_51_P235801  | NM_007564 | Zfp3611   | 12192  | zinc finger protein 36, C3H type-like 1                   | 2.09 | 2.36 | 0.03 |
| A_52_P195107  | NM_021359 | Itgb6     | 16420  | integrin beta 6                                           | 2.26 | 2.36 | 0.01 |
| A_52_P151853  | NM_001025 | Tpd52     | 21985  | tumor protein D52                                         | 2.41 | 2.36 | 0.01 |
| A_52_P154800  | NM_139269 | Pla2g16   | 225845 | phospholipase A2, group XVI                               | 1.40 | 2.36 | 0.67 |
| A_51_P383320  | NM_009543 | Rnf103    | 22644  | ring finger protein 103                                   | 2.66 | 2.35 | 0.00 |
| A_51_P519295  | NM_009817 | Cast      | 12380  | calpastatin                                               | 2.57 | 2.35 | 0.00 |
| A_52_P35174   | NM_011710 | Wars      | 22375  | tryptophanyl-tRNA synthetase                              | 2.33 | 2.35 | 0.01 |
| A_52_P587738  | NM_008773 | P2ry2     | 18442  | purinergic receptor P2Y, G-protein coupled 2              | 2.25 | 2.35 | 0.01 |

|              |           |           |        |                                                                                |      |      |      |
|--------------|-----------|-----------|--------|--------------------------------------------------------------------------------|------|------|------|
| A_51_P493886 | NM_173866 | Gpt2      | 108682 | glutamic pyruvate transaminase (alanine aminotransferase) 2                    | 1.92 | 2.35 | 0.06 |
| A_52_P189618 | NM_028768 | Armc8     | 74125  | armadillo repeat containing 8                                                  | 2.30 | 2.35 | 0.01 |
| A_52_P552580 | NM_025895 | Med28     | 66999  | mediator of RNA polymerase II transcription, subunit 28 homolog (yeast)        | 2.80 | 2.34 | 0.00 |
| A_52_P127842 | NA        | NA        | NA     | NA                                                                             | 1.72 | 2.34 | 0.15 |
| A_51_P419711 | NM_001039 | Tmsb10    | 19240  | thymosin, beta 10                                                              | 1.83 | 2.34 | 0.09 |
| A_51_P475672 | AK137576  | Slc7a1    | 11987  | solute carrier family 7 (cationic amino acid transporter, y+ system), member 1 | 2.66 | 2.34 | 0.00 |
| A_52_P116264 | NM_175236 | Adhfe1    | 76187  | alcohol dehydrogenase, iron containing, 1                                      | 2.29 | 2.34 | 0.01 |
| A_51_P457306 | NM_015775 | Tmprss2   | 50528  | transmembrane protease, serine 2                                               | 2.08 | 2.34 | 0.03 |
| A_51_P265374 | NM_011979 | Vnn3      | 26464  | vanin 3                                                                        | 2.38 | 2.34 | 0.01 |
| A_52_P537590 | XM_129214 | Pcsk5     | 18552  | proprotein convertase subtilisin/kexin type 5                                  | 3.24 | 2.34 | 0.00 |
| A_51_P148311 | NM_028850 | Chic2     | 74277  | cysteine-rich hydrophobic domain 2                                             | 2.91 | 2.34 | 0.00 |
| A_51_P405476 | NM_010185 | Fcer1g    | 14127  | Fc receptor, IgE, high affinity I, gamma polypeptide                           | 2.46 | 2.33 | 0.00 |
| A_52_P474902 | BC030415  | Col20a1   | 73368  | collagen, type XX, alpha 1                                                     | 2.15 | 2.33 | 0.02 |
| A_51_P262340 | BC106176  | Rbm3      | 19652  | RNA binding motif protein 3                                                    | 2.75 | 2.33 | 0.00 |
| A_52_P714621 | AK008061  | 2010003D2 | 76725  | RIKEN cDNA 2010003D24 gene                                                     | 2.10 | 2.33 | 0.03 |
| A_51_P304500 | NM_001025 | Tapbp     | 21356  | TAP binding protein                                                            | 2.67 | 2.33 | 0.00 |
| A_52_P61102  | NM_011388 | Slc10a2   | 20494  | solute carrier family 10, member 2                                             | 1.84 | 2.33 | 0.09 |
| A_52_P104961 | NA        | NA        | NA     | NA                                                                             | 2.04 | 2.33 | 0.03 |
| A_52_P646515 | NM_013748 | Clnk      | 27278  | cytokine-dependent hematopoietic cell linker                                   | 1.37 | 2.32 | 0.77 |
| A_51_P328725 | NM_010831 | Sik1      | 17691  | salt inducible kinase 1                                                        | 1.83 | 2.32 | 0.09 |
| A_52_P475229 | NM_029337 | Ep400     | 75560  | E1A binding protein p400                                                       | 2.00 | 2.32 | 0.04 |
| A_51_P336833 | NM_024406 | Fabp4     | 11770  | fatty acid binding protein 4, adipocyte                                        | 2.36 | 2.32 | 0.01 |
| A_52_P98140  | BE865018  | NA        | NA     | NA                                                                             | 2.35 | 2.32 | 0.01 |
| A_52_P176234 | NM_011240 | Ranbp2    | 19386  | RAN binding protein 2                                                          | 2.06 | 2.32 | 0.03 |
| A_52_P646808 | AK169921  | Otud5     | 54644  | OTU domain containing 5                                                        | 2.01 | 2.31 | 0.04 |
| A_52_P307267 | NM_008477 | Ktn1      | 16709  | kinectin 1                                                                     | 2.49 | 2.31 | 0.00 |
| A_52_P444480 | NM_023438 | Tmem132e  | 270893 | transmembrane protein 132E                                                     | 3.20 | 2.31 | 0.00 |
| A_51_P189269 | NM_175341 | Mbnl2     | 105559 | muscleblind-like 2                                                             | 2.55 | 2.31 | 0.00 |
| A_52_P487303 | NM_011246 | Rasgrp1   | 19419  | RAS guanyl releasing protein 1                                                 | 2.31 | 2.31 | 0.01 |
| A_51_P148069 | AK172914  | Lpgat1    | 226856 | lysophosphatidylglycerol acyltransferase 1                                     | 2.71 | 2.31 | 0.00 |



|              |           |           |        |                                                                                     |      |      |      |
|--------------|-----------|-----------|--------|-------------------------------------------------------------------------------------|------|------|------|
| A_52_P255841 | NM_031403 | Dbr1      | 83703  | debranching enzyme homolog 1 ( <i>S. cerevisiae</i> )                               | 2.78 | 2.31 | 0.00 |
| A_51_P256766 | NM_009016 | Raet1a    | 19368  | retinoic acid early transcript 1, alpha                                             | 1.74 | 2.31 | 0.15 |
| A_51_P226269 | NM_025427 | 1190002H2 | 66214  | RIKEN cDNA 1190002H23 gene                                                          | 2.03 | 2.30 | 0.04 |
| A_51_P499838 | NM_009763 | Bst1      | 12182  | bone marrow stromal cell antigen 1                                                  | 1.89 | 2.30 | 0.07 |
| A_51_P146753 | NM_007781 | Csf2rb2   | 12984  | colony stimulating factor 2 receptor, beta 2, low-affinity (granulocyte-macrophage) | 2.56 | 2.30 | 0.00 |
| A_52_P186485 | NA        | NA        | NA     | NA                                                                                  | 2.54 | 2.30 | 0.00 |
| A_52_P607230 | NM_010740 | Cd93      | 17064  | CD93 antigen                                                                        | 2.97 | 2.30 | 0.00 |
| A_51_P394065 | NM_007840 | Ddx5      | 13207  | DEAD (Asp-Glu-Ala-Asp) box polypeptide 5                                            | 3.27 | 2.30 | 0.00 |
| A_51_P240374 | NM_007731 | Col13a1   | 12817  | collagen, type XIII, alpha 1                                                        | 2.21 | 2.30 | 0.01 |
| A_52_P252348 | NM_029077 | Trim14    | 74735  | tripartite motif-containing 14                                                      | 2.43 | 2.30 | 0.01 |
| A_52_P286520 | NM_018824 | Slc23a2   | 54338  | solute carrier family 23 (nucleobase transporters), member 2                        | 2.14 | 2.30 | 0.02 |
| A_51_P289706 | NM_011916 | Xrn1      | 24127  | 5'-3' exoribonuclease 1                                                             | 2.27 | 2.30 | 0.01 |
| A_52_P598835 | AK038660  | NA        | NA     | NA                                                                                  | 1.72 | 2.29 | 0.15 |
| A_52_P33800  | NM_207636 | Fndc3a    | 319448 | fibronectin type III domain containing 3A                                           | 1.93 | 2.29 | 0.05 |
| A_51_P188211 | NM_008558 | Max       | 17187  | Max protein                                                                         | 1.86 | 2.29 | 0.07 |
| A_52_P397944 | XM_146900 | NA        | NA     | NA                                                                                  | 2.22 | 2.29 | 0.01 |
| A_52_P582309 | NM_016736 | Nub1      | 53312  | negative regulator of ubiquitin-like proteins 1                                     | 2.34 | 2.29 | 0.01 |
| A_51_P293781 | NM_016863 | Fkbp1b    | 14226  | FK506 binding protein 1b                                                            | 2.84 | 2.29 | 0.00 |
| A_52_P553820 | NA        | NA        | NA     | NA                                                                                  | 1.92 | 2.29 | 0.06 |
| A_52_P675039 | NM_028429 | Fhad1     | 329977 | forkhead-associated (FHA) phosphopeptide binding domain 1                           | 2.46 | 2.29 | 0.01 |
| A_51_P428372 | NM_023785 | Ppbp      | 57349  | pro-platelet basic protein                                                          | 2.05 | 2.29 | 0.03 |
| A_52_P507393 | NM_026011 | Arl8b     | 67166  | ADP-ribosylation factor-like 8B                                                     | 1.82 | 2.29 | 0.10 |
| A_52_P294834 | NM_001079 | 2310038E1 | 71903  | RIKEN cDNA 2310038E17 gene                                                          | 2.13 | 2.29 | 0.02 |
| A_51_P299454 | NM_009743 | Bcl2l1    | 12048  | BCL2-like 1                                                                         | 2.60 | 2.29 | 0.00 |
| A_51_P384999 | BC065092  | Heatr6    | 217026 | HEAT repeat containing 6                                                            | 2.40 | 2.29 | 0.01 |
| A_51_P276149 | NM_146588 | Olf1030   | 258581 | olfactory receptor 1030                                                             | 2.14 | 2.29 | 0.02 |
| A_51_P221014 | NM_010581 | Cd47      | 16423  | CD47 antigen (Rh-related antigen, integrin-associated signal transducer)            | 2.32 | 2.29 | 0.01 |
| A_51_P515623 | NM_026111 | Qpctl     | 67369  | glutaminy-peptide cyclotransferase-like                                             | 1.78 | 2.28 | 0.12 |
| A_51_P265806 | NM_030601 | Clca2     | 80797  | chloride channel calcium activated 2                                                | 1.94 | 2.28 | 0.05 |
| A_52_P512575 | NM_175606 | Hopx      | 74318  | HOP homeobox                                                                        | 2.31 | 2.28 | 0.01 |

|              |           |           |        |                                                                                                            |      |      |      |
|--------------|-----------|-----------|--------|------------------------------------------------------------------------------------------------------------|------|------|------|
| A_52_P457567 | AK134619  | Slc4a4    | 54403  | solute carrier family 4 (anion exchanger), member 4                                                        | 2.21 | 2.28 | 0.01 |
| A_51_P192501 | NM_026240 | Gramd3    | 107022 | GRAM domain containing 3                                                                                   | 2.99 | 2.28 | 0.00 |
| A_52_P73134  | NM_130796 | Snx18     | 170625 | sorting nexin 18                                                                                           | 2.40 | 2.28 | 0.01 |
| A_51_P351238 | NM_026362 | 5033414D0 | 67759  | RIKEN cDNA 5033414D02 gene                                                                                 | 2.29 | 2.28 | 0.01 |
| A_51_P136883 | NM_009005 | Rab7      | 19349  | RAB7, member RAS oncogene family                                                                           | 2.36 | 2.28 | 0.01 |
| A_52_P162967 | NM_007642 | Cd28      | 12487  | CD28 antigen                                                                                               | 1.91 | 2.28 | 0.06 |
| A_52_P313905 | NM_134122 | Nrm       | 106582 | nurim (nuclear envelope membrane protein)                                                                  | 2.19 | 2.28 | 0.02 |
| A_51_P212308 | NM_009988 | Cxadr     | 13052  | coxsackie virus and adenovirus receptor                                                                    | 1.72 | 2.28 | 0.15 |
| A_52_P161630 | NM_145933 | St6gal1   | 20440  | beta galactoside alpha 2,6 sialyltransferase 1                                                             | 2.68 | 2.28 | 0.00 |
| A_51_P369862 | NM_178772 | Nceh1     | 320024 | arylacetamide deacetylase-like 1                                                                           | 2.18 | 2.28 | 0.02 |
| A_52_P276935 | NM_001037 | Dnajb6    | 23950  | DnaJ (Hsp40) homolog, subfamily B, member 6                                                                | 2.52 | 2.27 | 0.00 |
| A_52_P343856 | NM_178661 | Creb3l2   | 208647 | cAMP responsive element binding protein 3-like 2                                                           | 2.30 | 2.27 | 0.01 |
| A_52_P535907 | NM_145943 | BC031781  | 208768 | cDNA sequence BC031781                                                                                     | 1.85 | 2.27 | 0.09 |
| A_52_P309044 | NM_001012 | Ccdc55    | 237859 | coiled-coil domain containing 55                                                                           | 2.08 | 2.27 | 0.03 |
| A_51_P352782 | AK017901  | Prkce     | 18754  | protein kinase C, epsilon                                                                                  | 2.49 | 2.27 | 0.00 |
| A_51_P296755 | NM_010186 | Fcgr1     | 14129  | Fc receptor, IgG, high affinity I                                                                          | 1.95 | 2.27 | 0.05 |
| A_51_P280761 | XM_885873 | Baz1a     | 217578 | bromodomain adjacent to zinc finger domain 1A                                                              | 2.33 | 2.27 | 0.01 |
| A_51_P390967 | NM_021398 | Slc43a3   | 58207  | solute carrier family 43, member 3                                                                         | 2.40 | 2.27 | 0.01 |
| A_51_P418662 | AK138110  | Rpl27a    | 26451  | ribosomal protein L27A                                                                                     | 1.83 | 2.27 | 0.09 |
| A_51_P223498 | NM_172653 | Slc39a10  | 227059 | solute carrier family 39 (zinc transporter), member 10<br>sema domain, immunoglobulin domain (Ig), and GPI | 1.82 | 2.27 | 0.09 |
| A_52_P410765 | NM_011352 | Sema7a    | 20361  | membrane anchor, (semaphorin) 7A                                                                           | 2.36 | 2.27 | 0.01 |
| A_52_P334562 | NM_009504 | Vdr       | 22337  | vitamin D receptor                                                                                         | 1.87 | 2.27 | 0.07 |
| A_52_P909274 | NM_011173 | Pros1     | 19128  | protein S (alpha)                                                                                          | 2.13 | 2.27 | 0.02 |
| A_52_P299053 | NM_023587 | Ptplb     | 70757  | protein tyrosine phosphatase-like (proline instead of<br>catalytic arginine), member b                     | 2.76 | 2.26 | 0.00 |
| A_51_P333460 | AK155591  | 5430427O1 | 71398  | RIKEN cDNA 5430427O19 gene                                                                                 | 2.94 | 2.26 | 0.00 |
| A_51_P334344 | AK047044  | Phf20l1   | 239510 | PHD finger protein 20-like 1                                                                               | 2.60 | 2.26 | 0.00 |
| A_51_P274593 | NM_212446 | Psmf1     | 228769 | proteasome (prosome, macropain) inhibitor subunit 1                                                        | 2.77 | 2.26 | 0.00 |
| A_51_P284045 | NA        | NA        | NA     | NA                                                                                                         | 1.70 | 2.26 | 0.16 |

|              |           |                 |        |                                                                                          |      |      |      |
|--------------|-----------|-----------------|--------|------------------------------------------------------------------------------------------|------|------|------|
| A_52_P415440 | AK132208  | Rps12           | 20042  | ribosomal protein S12                                                                    | 2.15 | 2.26 | 0.02 |
| A_51_P371635 | AK043285  | A730081D(       | 319304 | RIKEN cDNA A730081D07 gene                                                               | 1.57 | 2.26 | 0.30 |
| A_52_P481319 | NA        | NA              | NA     | NA                                                                                       | 1.81 | 2.26 | 0.10 |
| A_52_P200703 | NM_029078 | Pcf11           | 74737  | cleavage and polyadenylation factor subunit homolog<br>( <i>S. cerevisiae</i> )          | 2.02 | 2.26 | 0.04 |
| A_51_P458778 | NM_008278 | Hpgd            | 15446  | hydroxyprostaglandin dehydrogenase 15 (NAD)                                              | 1.75 | 2.26 | 0.14 |
| A_51_P468742 | NM_025697 | 6330409N(       | 66674  | RIKEN cDNA 6330409N04 gene                                                               | 2.23 | 2.26 | 0.01 |
| A_51_P174434 | NM_001014 | Cenpj           | 219103 | centromere protein J                                                                     | 1.48 | 2.26 | 0.46 |
| A_51_P444934 | NM_011518 | Sykb            | 20963  | spleen tyrosine kinase                                                                   | 2.28 | 2.26 | 0.01 |
| A_52_P231041 | NM_178119 | Agap1           | 347722 | ArfGAP with GTPase domain, ankyrin repeat and PH<br>domain 1                             | 2.38 | 2.25 | 0.01 |
| A_51_P123613 | BC078630  | Nup98           | 269966 | nucleoporin 98                                                                           | 2.34 | 2.25 | 0.01 |
| A_51_P131942 | NM_027193 | Dph5            | 69740  | DPH5 homolog ( <i>S. cerevisiae</i> )                                                    | 2.57 | 2.25 | 0.00 |
| A_51_P442719 | NM_181399 | Usp6nl          | 98910  | USP6 N-terminal like                                                                     | 2.01 | 2.25 | 0.04 |
| A_52_P100140 | NM_008601 | Mitf            | 17342  | microphthalmia-associated transcription factor                                           | 1.49 | 2.25 | 0.44 |
| A_51_P130841 | NA        | NA              | NA     | NA                                                                                       | 2.44 | 2.25 | 0.01 |
| A_51_P327011 | NM_001009 | Pde1a           | 18573  | phosphodiesterase 1A, calmodulin-dependent                                               | 2.74 | 2.25 | 0.00 |
| A_51_P121622 | NA        | NA              | NA     | NA                                                                                       | 2.44 | 2.25 | 0.01 |
| A_52_P636894 | AK081953  | 2010106G(       | 66552  | RIKEN cDNA 2010106G01 gene                                                               | 2.54 | 2.24 | 0.00 |
| A_52_P192071 | NM_009805 | Cflar           | 12633  | CASP8 and FADD-like apoptosis regulator                                                  | 2.00 | 2.24 | 0.04 |
| A_51_P216550 | NM_011641 | Trp63           | 22061  | transformation related protein 63                                                        | 1.84 | 2.24 | 0.09 |
| A_51_P441426 | NM_019932 | Pf4             | 56744  | platelet factor 4                                                                        | 2.01 | 2.24 | 0.04 |
| A_51_P310076 | NM_010945 | Nsmaf           | 18201  | neutral sphingomyelinase (N-SMase) activation<br>associated factor                       | 2.23 | 2.24 | 0.01 |
| A_52_P630632 | NM_134083 | Rcbtb2          | 105670 | regulator of chromosome condensation (RCC1) and BTB<br>(POZ) domain containing protein 2 | 2.32 | 2.24 | 0.01 |
| A_52_P296632 | XR_003643 | NA              | NA     | NA                                                                                       | 1.61 | 2.24 | 0.24 |
| A_52_P95910  | NM_011673 | Ugcg            | 22234  | UDP-glucose ceramide glucosyltransferase                                                 | 2.61 | 2.23 | 0.00 |
| A_51_P504237 | NM_023220 | 2010106G(       | 66552  | RIKEN cDNA 2010106G01 gene                                                               | 2.53 | 2.23 | 0.00 |
| A_52_P569355 | XM_194424 | NA              | NA     | NA                                                                                       | 2.26 | 2.23 | 0.01 |
| A_51_P261835 | NM_025376 | Tmem8c          | 66139  | transmembrane protein 8C                                                                 | 2.37 | 2.23 | 0.01 |
| A_52_P597461 | NM_011386 | Skil            | 20482  | SKI-like                                                                                 | 2.43 | 2.23 | 0.01 |
| A_52_P565396 | XM_992322 | LOC67670&676708 |        | similar to H-2 class I histocompatibility antigen, L-D<br>alpha chain precursor          | 2.11 | 2.23 | 0.02 |

|              |           |         |        |                                                                 |      |      |      |
|--------------|-----------|---------|--------|-----------------------------------------------------------------|------|------|------|
| A_51_P300936 | BC050849  | Rbbp8   | 225182 | retinoblastoma binding protein 8                                | 2.51 | 2.23 | 0.00 |
| A_51_P204862 | NM_026221 | Ppfibp1 | 67533  | PTPRF interacting protein, binding protein 1 (liprin beta 1)    | 1.87 | 2.23 | 0.07 |
| A_52_P21986  | NM_026062 | Fam69a  | 67266  | family with sequence similarity 69, member A                    | 2.11 | 2.23 | 0.02 |
| A_51_P206585 | NM_009821 | Runx1   | 12394  | runt related transcription factor 1                             | 2.57 | 2.23 | 0.00 |
| A_52_P131466 | NM_009008 | Rac2    | 19354  | RAS-related C3 botulinum substrate 2                            | 2.15 | 2.23 | 0.02 |
| A_52_P543855 | NM_172290 | Ntm     | 235106 | neurotrimin                                                     | 1.56 | 2.23 | 0.30 |
| A_51_P453810 | NM_207215 | Mycbp2  | 105689 | MYC binding protein 2                                           | 2.14 | 2.23 | 0.02 |
| A_52_P543016 | NM_021415 | Cacna1h | 58226  | calcium channel, voltage-dependent, T type, alpha 1H subunit    | 2.66 | 2.22 | 0.00 |
| A_51_P174894 | BC050941  | Mkl1    | 223701 | MKL (megakaryoblastic leukemia)/myocardin-like 1                | 2.16 | 2.22 | 0.02 |
| A_52_P641414 | AK039998  | Dennd1b | 329260 | DENN/MADD domain containing 1B                                  | 1.90 | 2.22 | 0.07 |
| A_51_P312952 | NM_028034 | Tdrd12  | 71981  | tudor domain containing 12                                      | 2.10 | 2.22 | 0.02 |
| A_52_P6994   | NM_080446 | Helb    | 117599 | helicase (DNA) B                                                | 2.39 | 2.22 | 0.01 |
| A_51_P426633 | NM_153806 | Dnttip2 | 99480  | deoxynucleotidyltransferase, terminal, interacting protein 2    | 2.53 | 2.22 | 0.00 |
| A_51_P322871 | NM_133816 | Sh3bp4  | 98402  | SH3-domain binding protein 4                                    | 2.36 | 2.22 | 0.01 |
| A_51_P383584 | XM_619530 | NA      | NA     | NA                                                              | 1.80 | 2.22 | 0.11 |
| A_52_P103977 | NM_178112 | Ints8   | 72656  | integrator complex subunit 8                                    | 1.89 | 2.22 | 0.07 |
| A_52_P622680 | NM_029362 | Chmp4b  | 75608  | chromatin modifying protein 4B                                  | 1.75 | 2.22 | 0.14 |
| A_52_P481320 | NA        | NA      | NA     | NA                                                              | 2.18 | 2.22 | 0.02 |
| A_52_P147666 | NM_023214 | Slc30a7 | 66500  | solute carrier family 30 (zinc transporter), member 7           | 2.13 | 2.22 | 0.02 |
| A_51_P296027 | NM_024448 | Rab12   | 19328  | RAB12, member RAS oncogene family                               | 2.31 | 2.21 | 0.01 |
| A_52_P508167 | NM_010093 | E2f3    | 13557  | E2F transcription factor 3                                      | 2.73 | 2.21 | 0.00 |
| A_51_P131335 | NM_153568 | Lrrc66  | 231296 | leucine rich repeat containing 66                               | 2.48 | 2.21 | 0.00 |
| A_51_P477440 | NM_001029 | Sec23ip | 207352 | Sec23 interacting protein                                       | 2.33 | 2.21 | 0.01 |
| A_51_P147964 | NM_026959 | Stx18   | 71116  | syntaxin 18                                                     | 2.31 | 2.21 | 0.01 |
| A_52_P656659 | NM_011396 | Slc22a5 | 20520  | solute carrier family 22 (organic cation transporter), member 5 | 1.89 | 2.21 | 0.07 |
| A_51_P203675 | NM_021407 | Trem3   | 58218  | triggering receptor expressed on myeloid cells 3                | 2.40 | 2.21 | 0.01 |
| A_51_P135491 | NM_009805 | Cflar   | 12633  | CASP8 and FADD-like apoptosis regulator                         | 1.94 | 2.21 | 0.05 |

|               |           |         |        |                                                                             |      |      |      |
|---------------|-----------|---------|--------|-----------------------------------------------------------------------------|------|------|------|
|               |           |         |        | 1-acylglycerol-3-phosphate O-acyltransferase 4                              |      |      |      |
| A_52_P3029    | NM_026644 | Agpat4  | 68262  | (lysophosphatidic acid acyltransferase, delta)                              | 1.94 | 2.21 | 0.05 |
| A_52_P542912  | NM_144846 | Fam49b  | 223601 | family with sequence similarity 49, member B                                | 2.06 | 2.21 | 0.03 |
| A_51_P101375  | NM_145933 | St6gal1 | 20440  | beta galactoside alpha 2,6 sialyltransferase 1                              | 1.82 | 2.21 | 0.10 |
| A_51_P338924  | NM_010509 | Ifnar2  | 15976  | interferon (alpha and beta) receptor 2                                      | 2.12 | 2.21 | 0.02 |
| A_52_P91447   | NM_009671 | Ankfy1  | 11736  | ankyrin repeat and FYVE domain containing 1                                 | 2.26 | 2.21 | 0.01 |
| A_51_P372826  | NM_145533 | Smox    | 228608 | spermine oxidase                                                            | 2.49 | 2.21 | 0.00 |
| A_52_P117420  | NM_177089 | Tacc1   | 320165 | transforming, acidic coiled-coil containing protein 1                       | 2.48 | 2.20 | 0.00 |
| A_51_P367310  | NM_028083 | Chaf1b  | 110749 | chromatin assembly factor 1, subunit B (p60)                                | 1.88 | 2.20 | 0.07 |
| A_52_P246252  | NM_007812 | Cyp2a5  | 13087  | cytochrome P450, family 2, subfamily a, polypeptide 5                       | 1.72 | 2.20 | 0.15 |
| A_52_P512901  | NM_019717 | Atl2    | 56298  | atlastin GTPase 2                                                           | 1.57 | 2.20 | 0.30 |
| A_52_P398989  | NM_139200 | Cytip   | 227929 | cytohesin 1 interacting protein                                             | 2.15 | 2.20 | 0.02 |
| A_52_P544878  | AK033698  | Nedd4l  | 83814  | neural precursor cell expressed, developmentally down-regulated gene 4-like | 1.71 | 2.20 | 0.16 |
| A_51_P202408  | NM_008967 | Ptgir   | 19222  | prostaglandin I receptor (IP)                                               | 2.48 | 2.20 | 0.00 |
| A_51_P220370  | NM_133751 | NA      | NA     | NA                                                                          | 2.57 | 2.20 | 0.00 |
| A_51_P506792  | NM_001025 | Tpd52   | 21985  | tumor protein D52                                                           | 2.68 | 2.19 | 0.00 |
| A_52_P353038  | NM_001025 | Trim26  | 22670  | tripartite motif-containing 26                                              | 2.68 | 2.19 | 0.00 |
| A_52_P628590  | NM_027514 | Pvr     | 52118  | poliovirus receptor                                                         | 1.89 | 2.19 | 0.07 |
| A_51_P511375  | NM_011240 | Ranbp2  | 19386  | RAN binding protein 2                                                       | 2.39 | 2.19 | 0.01 |
| A_51_P224023  | NM_144846 | Fam49b  | 223601 | family with sequence similarity 49, member B                                | 2.23 | 2.19 | 0.01 |
| A_51_P235798  | M58566    | Zfp361l | 12192  | zinc finger protein 36, C3H type-like 1                                     | 1.75 | 2.19 | 0.14 |
| A_52_P796682  | NM_007633 | Ccne1   | 12447  | cyclin E1                                                                   | 1.72 | 2.19 | 0.15 |
| A_51_P104596  | NM_009671 | Ankfy1  | 11736  | ankyrin repeat and FYVE domain containing 1                                 | 2.19 | 2.19 | 0.02 |
| A_52_P1131985 | AK038070  | Hivep3  | 16656  | human immunodeficiency virus type I enhancer binding protein 3              | 2.09 | 2.18 | 0.03 |
| A_52_P78966   | NM_024454 | Rab21   | 216344 | RAB21, member RAS oncogene family                                           | 1.96 | 2.18 | 0.05 |
| A_51_P191116  | NA        | NA      | NA     | NA                                                                          | 1.36 | 2.18 | 0.82 |
| A_51_P275302  | NM_008879 | Lcp1    | 18826  | lymphocyte cytosolic protein 1                                              | 1.76 | 2.18 | 0.13 |
| A_52_P276794  | NM_023434 | Tox4    | 268741 | TOX high mobility group box family member 4                                 | 2.11 | 2.18 | 0.02 |
| A_52_P456629  | NM_027296 | Trnt1   | 70047  | tRNA nucleotidyl transferase, CCA-adding, 1                                 | 2.31 | 2.18 | 0.01 |

|              |           |           |        |                                                                                                                                                                   |      |      |      |
|--------------|-----------|-----------|--------|-------------------------------------------------------------------------------------------------------------------------------------------------------------------|------|------|------|
| A_51_P337935 | AK008024  | Slc7a15   | 328059 | solute carrier family 7 (cationic amino acid transporter, y+ system), member 15                                                                                   | 2.54 | 2.18 | 0.00 |
| A_52_P507802 | NM_010336 | Lpar1     | 14745  | lysophosphatidic acid receptor 1                                                                                                                                  | 2.45 | 2.18 | 0.01 |
| A_51_P111462 | NM_172595 | Arl15     | 218639 | ADP-ribosylation factor-like 15                                                                                                                                   | 2.02 | 2.18 | 0.04 |
| A_51_P225808 | NM_019963 | Stat2     | 20847  | signal transducer and activator of transcription 2                                                                                                                | 2.60 | 2.18 | 0.00 |
| A_52_P540045 | AK083897  | NA        | NA     | NA                                                                                                                                                                | 2.21 | 2.18 | 0.01 |
| A_51_P492893 | NM_028767 | Foxp4     | 74123  | forkhead box P4                                                                                                                                                   | 2.24 | 2.18 | 0.01 |
| A_52_P477229 | NA        | NA        | NA     | NA                                                                                                                                                                | 3.02 | 2.18 | 0.00 |
| A_51_P240801 | BC046640  | Tmem173   | 72512  | transmembrane protein 173                                                                                                                                         | 1.78 | 2.17 | 0.11 |
| A_52_P650387 | NM_001045 | Ccnj1     | 380694 | cyclin J-like                                                                                                                                                     | 2.54 | 2.17 | 0.00 |
| A_52_P465886 | NM_026240 | Gramd3    | 107022 | GRAM domain containing 3                                                                                                                                          | 2.41 | 2.17 | 0.01 |
| A_51_P467490 | AK139909  | Larp4     | 207214 | La ribonucleoprotein domain family, member 4                                                                                                                      | 2.58 | 2.17 | 0.00 |
| A_51_P199671 | NM_172472 | Tcf3      | 209446 | transcription factor E3                                                                                                                                           | 2.46 | 2.17 | 0.01 |
| A_52_P175066 | NM_009847 | Cd2ap     | 12488  | CD2-associated protein                                                                                                                                            | 2.43 | 2.17 | 0.01 |
| A_52_P677117 | NM_011210 | Ptpn22    | 19264  | protein tyrosine phosphatase, receptor type, C                                                                                                                    | 2.42 | 2.17 | 0.01 |
| A_51_P185757 | NM_177569 | NA        | NA     | NA                                                                                                                                                                | 2.09 | 2.17 | 0.03 |
| A_52_P144858 | NM_008466 | Kpna3     | 16648  | karyopherin (importin) alpha 3                                                                                                                                    | 2.19 | 2.17 | 0.02 |
| A_51_P374203 | NM_023158 | Cxcl16    | 66102  | chemokine (C-X-C motif) ligand 16                                                                                                                                 | 2.44 | 2.17 | 0.01 |
| A_51_P228232 | NM_008028 | Flot2     | 14252  | flotillin 2                                                                                                                                                       | 2.44 | 2.16 | 0.01 |
| A_51_P414746 | NM_139222 | Defb15    | 246082 | defensin beta 15                                                                                                                                                  | 2.12 | 2.16 | 0.02 |
| A_51_P480709 | NM_011740 | Ywhaz     | 22631  | tyrosine 3-monooxygenase/tryptophan 5-monooxygenase activation protein, zeta polypeptide CD47 antigen (Rh-related antigen, integrin-associated signal transducer) | 1.84 | 2.16 | 0.09 |
| A_52_P166435 | AK164165  | Cd47      | 16423  | signal transducer)                                                                                                                                                | 2.54 | 2.16 | 0.00 |
| A_52_P682299 | AK085055  | Clic4     | 29876  | chloride intracellular channel 4 (mitochondrial)                                                                                                                  | 2.37 | 2.16 | 0.01 |
| A_51_P108901 | NM_023731 | Ccdc86    | 108673 | coiled-coil domain containing 86                                                                                                                                  | 2.04 | 2.16 | 0.03 |
| A_51_P439876 | AK020498  | Map4k4    | 26921  | mitogen-activated protein kinase kinase kinase kinase 4                                                                                                           | 1.96 | 2.16 | 0.04 |
| A_51_P509679 | BC004786  | Igh-VJ558 | 16061  | immunoglobulin heavy chain (J558 family)                                                                                                                          | 1.68 | 2.16 | 0.18 |
| A_51_P481342 | NM_011673 | Ugcg      | 22234  | UDP-glucose ceramide glucosyltransferase                                                                                                                          | 2.31 | 2.15 | 0.01 |
| A_51_P405478 | J05020    | Fcgr1g    | 14127  | Fc receptor, IgE, high affinity I, gamma polypeptide                                                                                                              | 1.78 | 2.15 | 0.12 |
| A_52_P52803  | NM_010478 | Hspa1b    | 15511  | heat shock protein 1B                                                                                                                                             | 1.79 | 2.15 | 0.11 |

|              |           |           |        |                                                                                                            |      |      |      |
|--------------|-----------|-----------|--------|------------------------------------------------------------------------------------------------------------|------|------|------|
| A_52_P649685 | NM_146083 | Sfrs7     | 225027 | splicing factor, arginine/serine-rich 7                                                                    | 2.09 | 2.15 | 0.03 |
| A_52_P191193 | NM_172595 | Arl15     | 218639 | ADP-ribosylation factor-like 15                                                                            | 2.14 | 2.15 | 0.02 |
| A_52_P355084 | NM_144797 | Metrn1    | 210029 | meteorin, glial cell differentiation regulator-like                                                        | 1.58 | 2.15 | 0.28 |
| A_52_P282068 | NM_011752 | Zfp259    | 22687  | zinc finger protein 259                                                                                    | 2.10 | 2.15 | 0.03 |
| A_52_P127925 | NM_031198 | Tcfec     | 21426  | transcription factor EC                                                                                    | 1.61 | 2.15 | 0.24 |
| A_52_P574214 | NM_028244 | Rrp1b     | 72462  | ribosomal RNA processing 1 homolog B ( <i>S. cerevisiae</i> )                                              | 1.68 | 2.15 | 0.18 |
| A_51_P464308 | NM_013531 | Gnb4      | 14696  | guanine nucleotide binding protein (G protein), beta 4                                                     | 1.45 | 2.15 | 0.53 |
| A_51_P288839 | NM_138604 | Otud5     | 54644  | OTU domain containing 5                                                                                    | 2.29 | 2.15 | 0.01 |
| A_51_P311621 | AK002578  | 4930453N2 | 67609  | RIKEN cDNA 4930453N24 gene                                                                                 | 2.61 | 2.15 | 0.00 |
| A_51_P395864 | AK021106  | C030027H1 | 177465 | RIKEN cDNA C030027H14 gene                                                                                 | 2.10 | 2.15 | 0.03 |
| A_51_P312885 | NM_027898 | Gramd1a   | 52857  | GRAM domain containing 1A                                                                                  | 2.45 | 2.15 | 0.01 |
| A_52_P338266 | NA        | NA        | NA     | NA                                                                                                         | 1.64 | 2.15 | 0.21 |
| A_51_P420841 | AK054249  | Lrrc8b    | 433926 | leucine rich repeat containing 8 family, member B                                                          | 2.47 | 2.15 | 0.00 |
| A_51_P180159 | BC004786  | Igh-VJ558 | 16061  | immunoglobulin heavy chain (J558 family)                                                                   | 1.45 | 2.14 | 0.53 |
| A_52_P236777 | AK029403  | Setd3     | 52690  | SET domain containing 3<br>v-maf musculoaponeurotic fibrosarcoma oncogene                                  | 1.77 | 2.14 | 0.12 |
| A_52_P495869 | NM_010658 | Mafb      | 16658  | family, protein B (avian)                                                                                  | 1.36 | 2.14 | 0.82 |
| A_52_P335842 | AK050411  | Rrbp1     | 81910  | ribosome binding protein 1                                                                                 | 2.55 | 2.14 | 0.00 |
| A_52_P438082 | NM_009884 | Cebpg     | 12611  | CCAAT/enhancer binding protein (C/EBP), gamma<br>PTPRF interacting protein, binding protein 1 (liprin beta | 1.83 | 2.14 | 0.09 |
| A_52_P443846 | NM_026221 | Ppfibp1   | 67533  | 1)<br>valosin containing protein (p97)/p47 complex                                                         | 1.85 | 2.14 | 0.09 |
| A_52_P145767 | NM_173443 | Vcpip1    | 70675  | interacting protein 1                                                                                      | 2.58 | 2.14 | 0.00 |
| A_51_P157297 | AK030011  | 4732418C0 | 230648 | RIKEN cDNA 4732418C07 gene                                                                                 | 1.96 | 2.14 | 0.04 |
| A_51_P467573 | NM_011669 | Usp12     | 22217  | ubiquitin specific peptidase 12                                                                            | 2.19 | 2.14 | 0.02 |
| A_52_P248604 | NM_009868 | Cdh5      | 12562  | cadherin 5                                                                                                 | 2.54 | 2.14 | 0.00 |
| A_51_P164998 | NM_025285 | Stmn2     | 20257  | stathmin-like 2                                                                                            | 1.78 | 2.14 | 0.12 |
| A_51_P432199 | NM_021788 | Sap30     | 60406  | sin3 associated polypeptide                                                                                | 2.02 | 2.14 | 0.04 |
| A_52_P333806 | NM_001033 | Fam82a2   | 67809  | family with sequence similarity 82, member A2                                                              | 2.03 | 2.14 | 0.04 |
| A_51_P349532 | NM_030698 | NA        | NA     | NA                                                                                                         | 2.66 | 2.14 | 0.00 |

|               |           |                |        |                                                       |      |      |      |
|---------------|-----------|----------------|--------|-------------------------------------------------------|------|------|------|
| A_52_P380895  | NM_001033 | Evi2a          | 14017  | ecotropic viral integration site 2a                   | 2.73 | 2.14 | 0.00 |
| A_51_P494078  | NM_053260 | Prss29         | 114662 | protease, serine, 29                                  | 2.71 | 2.14 | 0.00 |
| A_51_P434503  | NM_026981 | Dtwd1          | 69185  | DTW domain containing 1                               | 2.52 | 2.13 | 0.00 |
| A_52_P35377   | NM_018807 | Plagl2         | 54711  | pleiomorphic adenoma gene-like 2                      | 2.11 | 2.13 | 0.02 |
| A_51_P415519  | NM_026407 | Tmem39a        | 67846  | transmembrane protein 39a                             | 1.94 | 2.13 | 0.05 |
| A_52_P215507  | NM_026044 | Wdr85          | 67228  | WD repeat domain 85                                   | 1.95 | 2.13 | 0.05 |
| A_51_P175552  | NM_134058 | Pelo           | 105083 | pelota homolog (Drosophila)                           | 2.54 | 2.13 | 0.00 |
| A_51_P378079  | NM_008031 | Fmr1           | 14265  | fragile X mental retardation syndrome 1 homolog       | 2.45 | 2.13 | 0.01 |
| A_51_P187579  | M17518    | NA             | NA     | NA                                                    | 2.45 | 2.13 | 0.01 |
| A_51_P419666  | BC054536  | Adam11         | 11488  | a disintegrin and metallopeptidase domain 11          | 1.43 | 2.13 | 0.58 |
| A_52_P624572  | NM_009758 | Bmpr1a         | 12166  | bone morphogenetic protein receptor, type 1A          | 2.21 | 2.13 | 0.01 |
|               |           |                |        | tumor necrosis factor receptor superfamily, member    |      |      |      |
| A_52_P1068320 | NM_009399 | Tnfrsf11a      | 21934  | 11a                                                   | 2.35 | 2.13 | 0.01 |
| A_52_P273812  | NM_053088 | Ifitm5         | 73835  | interferon induced transmembrane protein 5            | 2.10 | 2.13 | 0.02 |
| A_52_P540085  | NM_011247 | Rbbp6          | 19647  | retinoblastoma binding protein 6                      | 2.26 | 2.13 | 0.01 |
| A_51_P279704  | NM_145923 | Rell1          | 100532 | RELT-like 1                                           | 2.44 | 2.13 | 0.01 |
| A_51_P176086  | NM_146187 | Ffar2          | 233079 | free fatty acid receptor 2                            | 1.49 | 2.13 | 0.44 |
| A_52_P489385  | XM_885832 | NA             | NA     | NA                                                    | 1.85 | 2.13 | 0.09 |
| A_52_P453778  | XM_620640 | NA             | NA     | NA                                                    | 2.25 | 2.13 | 0.01 |
| A_52_P293232  | NM_030705 | Mesdc1         | 80889  | mesoderm development candidate 1                      | 1.67 | 2.13 | 0.20 |
| A_52_P336159  | AK081953  | 2010106G01     | 66552  | RIKEN cDNA 2010106G01 gene                            | 2.32 | 2.12 | 0.01 |
| A_52_P315423  | NA        | NA             | NA     | NA                                                    | 1.52 | 2.12 | 0.37 |
| A_52_P491961  | NM_145944 | Ccdc25         | 67179  | coiled-coil domain containing 25                      | 2.02 | 2.12 | 0.04 |
|               |           |                |        |                                                       |      |      |      |
| A_52_P451073  | NM_178589 | Tnfrsf21       | 94185  | tumor necrosis factor receptor superfamily, member 21 | 2.42 | 2.12 | 0.01 |
|               |           |                |        | cysteine rich transmembrane BMP regulator 1 (chordin  |      |      |      |
| A_51_P496640  | AK053197  | Crim1          | 50766  | like)                                                 | 1.84 | 2.12 | 0.09 |
|               |           |                |        | DEAD/H (Asp-Glu-Ala-Asp/His) box polypeptide 3, X-    |      |      |      |
| A_52_P395575  | NM_010028 | Ddx3x          | 13205  | linked                                                | 2.32 | 2.12 | 0.01 |
| A_51_P452207  | NM_008541 | Smad5          | 17129  | MAD homolog 5 (Drosophila)                            | 2.21 | 2.12 | 0.01 |
| A_51_P362661  | NM_178753 | Spin4          | 270624 | spindlin family, member 4                             | 1.91 | 2.12 | 0.06 |
| A_52_P1189908 | BI793804  | Sox9           | 20682  | SRY-box containing gene 9                             | 2.64 | 2.12 | 0.00 |
| A_51_P429572  | NM_026127 | 4833420G167392 |        | RIKEN cDNA 4833420G17 gene                            | 1.34 | 2.12 | 0.86 |
| A_51_P199314  | AK164568  | Slc38a2        | 67760  | solute carrier family 38, member 2                    | 2.03 | 2.12 | 0.04 |



|              |           |           |        |                                                                       |      |      |      |
|--------------|-----------|-----------|--------|-----------------------------------------------------------------------|------|------|------|
| A_52_P151974 | AK017285  | Clcn5     | 12728  | chloride channel 5                                                    | 1.95 | 2.11 | 0.05 |
| A_51_P421578 | NA        | NA        | NA     | NA                                                                    | 2.62 | 2.11 | 0.00 |
| A_51_P411296 | NM_016714 | Nup50     | 18141  | nucleoporin 50                                                        | 2.58 | 2.11 | 0.00 |
| A_51_P181031 | NM_177690 | Nlrp2     | 232827 | NLR family, pyrin domain containing 2                                 | 1.31 | 2.11 | 0.97 |
| A_51_P365932 | NM_026250 | Gin1      | 252876 | gypsy retrotransposon integrase 1                                     | 2.37 | 2.11 | 0.01 |
| A_52_P129756 | NM_020559 | Alas1     | 11655  | aminolevulinic acid synthase 1                                        | 2.06 | 2.11 | 0.03 |
| A_51_P450854 | XM_992913 | NA        | NA     | NA                                                                    | 2.05 | 2.11 | 0.03 |
| A_51_P481482 | NM_027878 | Dram1     | 71712  | DNA-damage regulated autophagy modulator 1                            | 1.63 | 2.11 | 0.22 |
| A_52_P389595 | NM_030711 | Erap1     | 80898  | endoplasmic reticulum aminopeptidase 1                                | 2.38 | 2.11 | 0.01 |
| A_52_P494354 | NM_027418 | Mapk6     | 50772  | mitogen-activated protein kinase 6                                    | 1.77 | 2.11 | 0.13 |
| A_51_P128463 | XM_485455 | Grrp1     | 72690  | glycine/arginine rich protein 1                                       | 2.18 | 2.11 | 0.02 |
| A_51_P127367 | NM_008394 | Irf9      | 16391  | interferon regulatory factor 9                                        | 2.26 | 2.10 | 0.01 |
| A_52_P145861 | NM_019388 | Cd86      | 12524  | CD86 antigen                                                          | 2.12 | 2.10 | 0.02 |
| A_52_P351311 | NM_026273 | 4930453N2 | 67609  | RIKEN cDNA 4930453N24 gene                                            | 2.12 | 2.10 | 0.02 |
| A_51_P318012 | NM_024448 | Rab12     | 19328  | RAB12, member RAS oncogene family                                     | 2.36 | 2.10 | 0.01 |
| A_51_P437559 | NM_011589 | Timeless  | 21853  | timeless homolog (Drosophila)                                         | 2.29 | 2.10 | 0.01 |
| A_51_P117835 | NM_146441 | Olf933    | 258433 | olfactory receptor 933                                                | 1.50 | 2.10 | 0.44 |
| A_52_P239787 | NM_145944 | Ccdc25    | 67179  | coiled-coil domain containing 25                                      | 2.37 | 2.10 | 0.01 |
| A_51_P148597 | NM_026045 | Prpf18    | 67229  | PRP18 pre-mRNA processing factor 18 homolog (yeast)                   | 2.50 | 2.10 | 0.00 |
| A_52_P579933 | NM_001029 | Slc16a6   | 104681 | solute carrier family 16 (monocarboxylic acid transporters), member 6 | 1.41 | 2.10 | 0.61 |
| A_52_P369581 | NM_007499 | Atm       | 11920  | ataxia telangiectasia mutated homolog (human)                         | 2.11 | 2.10 | 0.02 |
| A_52_P620893 | BC030311  | Armc8     | 74125  | armadillo repeat containing 8                                         | 1.91 | 2.10 | 0.06 |
| A_52_P489202 | NM_001001 | 4732465J0 | 414105 | RIKEN cDNA 4732465J04 gene                                            | 1.89 | 2.10 | 0.07 |
| A_52_P649683 | NM_146083 | Sfrs7     | 225027 | splicing factor, arginine/serine-rich 7                               | 1.96 | 2.10 | 0.04 |
| A_52_P390227 | NM_027144 | Arhgef12  | 69632  | Rho guanine nucleotide exchange factor (GEF) 12                       | 2.28 | 2.09 | 0.01 |
| A_52_P89683  | XR_002509 | NA        | NA     | NA                                                                    | 1.81 | 2.09 | 0.11 |
| A_51_P255875 | NM_011061 | Padi4     | 18602  | peptidyl arginine deiminase, type IV                                  | 2.36 | 2.09 | 0.01 |
| A_52_P72354  | NA        | NA        | NA     | NA                                                                    | 1.59 | 2.09 | 0.27 |
| A_52_P496734 | AK052358  | Larp4     | 207214 | La ribonucleoprotein domain family, member 4                          | 2.02 | 2.09 | 0.04 |
| A_52_P574710 | BC064447  | Whsc1l1   | 234135 | Wolf-Hirschhorn syndrome candidate 1-like 1 (human)                   | 2.43 | 2.09 | 0.01 |

|              |           |           |        |                                                                                        |      |      |      |
|--------------|-----------|-----------|--------|----------------------------------------------------------------------------------------|------|------|------|
| A_52_P476754 | NM_176860 | Ubash3b   | 72828  | ubiquitin associated and SH3 domain containing, B                                      | 1.99 | 2.09 | 0.04 |
| A_51_P392687 | NM_011701 | Vim       | 22352  | vimentin                                                                               | 1.81 | 2.09 | 0.11 |
| A_52_P75975  | AK081329  | C130006E2 | 331563 | hypothetical protein C130006E23                                                        | 2.28 | 2.09 | 0.01 |
| A_52_P569499 | NA        | NA        | NA     | NA                                                                                     | 2.34 | 2.09 | 0.01 |
| A_51_P472249 | NM_011405 | Slc7a7    | 20540  | solute carrier family 7 (cationic amino acid transporter, $\gamma$ + system), member 7 | 1.62 | 2.09 | 0.22 |
| A_51_P260478 | NM_145823 | Pitpnc1   | 71795  | phosphatidylinositol transfer protein, cytoplasmic 1                                   | 2.18 | 2.09 | 0.02 |
| A_51_P123676 | AK034012  | Synpo     | 104027 | synaptopodin                                                                           | 2.20 | 2.09 | 0.01 |
| A_52_P217240 | NM_028292 | Ppme1     | 72590  | protein phosphatase methylesterase 1                                                   | 1.78 | 2.09 | 0.11 |
| A_52_P350111 | NM_011180 | Cyth1     | 19157  | cytohesin 1                                                                            | 1.72 | 2.09 | 0.15 |
| A_51_P439085 | NM_023516 | 2310016C0 | 69573  | RIKEN cDNA 2310016C08 gene                                                             | 1.69 | 2.09 | 0.17 |
| A_52_P407239 | NM_001077 | Pik3r1    | 18708  | phosphatidylinositol 3-kinase, regulatory subunit, polypeptide 1 (p85 alpha)           | 1.78 | 2.08 | 0.12 |
| A_52_P17466  | NA        | NA        | NA     | NA                                                                                     | 1.32 | 2.08 | 0.91 |
| A_51_P346964 | NM_029844 | Mrap      | 77037  | melanocortin 2 receptor accessory protein                                              | 2.01 | 2.08 | 0.04 |
| A_51_P309056 | NM_009868 | Cdh5      | 12562  | cadherin 5                                                                             | 1.78 | 2.08 | 0.12 |
| A_51_P502054 | NM_145546 | Gtf2b     | 229906 | general transcription factor IIB                                                       | 2.18 | 2.08 | 0.02 |
| A_52_P640296 | AK080318  | Fmn12     | 71409  | formin-like 2                                                                          | 2.10 | 2.08 | 0.02 |
| A_51_P113058 | NM_146658 | Olf1131   | 258652 | olfactory receptor 1131                                                                | 2.23 | 2.08 | 0.01 |
| A_51_P253117 | NM_178362 | Sorbs1    | 20411  | sorbin and SH3 domain containing 1                                                     | 2.35 | 2.08 | 0.01 |
| A_51_P470154 | NM_016705 | Kif21a    | 16564  | kinesin family member 21A                                                              | 1.70 | 2.08 | 0.16 |
| A_51_P368705 | NM_026574 | Ino80     | 68142  | INO80 homolog ( <i>S. cerevisiae</i> )                                                 | 2.31 | 2.08 | 0.01 |
| A_52_P392456 | NM_028810 | Rnd3      | 74194  | Rho family GTPase 3                                                                    | 2.02 | 2.08 | 0.04 |
| A_52_P572950 | NM_007502 | Atp1b3    | 11933  | ATPase, Na <sup>+</sup> /K <sup>+</sup> transporting, beta 3 polypeptide               | 1.80 | 2.08 | 0.11 |
| A_52_P286391 | NM_146096 | Fam108b   | 226016 | family with sequence similarity 108, member B                                          | 1.43 | 2.08 | 0.58 |
| A_52_P2710   | NM_023493 | Cml5      | 69049  | camello-like 5                                                                         | 1.30 | 2.08 | 1.04 |
| A_52_P638319 | XM_619609 | Gm5828    | 545306 | predicted gene 5828                                                                    | 1.67 | 2.08 | 0.20 |
| A_52_P450045 | NM_011276 | Rlim      | 19820  | ring finger protein, LIM domain interacting                                            | 2.22 | 2.07 | 0.01 |
| A_51_P336830 | NM_024406 | Fabp4     | 11770  | fatty acid binding protein 4, adipocyte                                                | 2.01 | 2.07 | 0.04 |
| A_51_P462047 | NM_172697 | Prpf38a   | 230596 | PRP38 pre-mRNA processing factor 38 (yeast) domain containing A                        | 1.64 | 2.07 | 0.21 |

|              |                     |        |                                                                                                                    |      |      |      |
|--------------|---------------------|--------|--------------------------------------------------------------------------------------------------------------------|------|------|------|
| A_52_P298854 | NM_028244 Rrp1b     | 72462  | ribosomal RNA processing 1 homolog B ( <i>S. cerevisiae</i> )<br>Tax1 (human T-cell leukemia virus type I) binding | 2.17 | 2.07 | 0.02 |
| A_51_P403273 | NM_025816 Tax1bp1   | 52440  | protein 1                                                                                                          | 1.62 | 2.07 | 0.22 |
| A_51_P300207 | NM_198609 Rsl24d1   | 225215 | ribosomal L24 domain containing 1                                                                                  | 1.80 | 2.07 | 0.11 |
| A_51_P198835 | NM_013760 Dnajb9    | 27362  | Dnaj (Hsp40) homolog, subfamily B, member 9                                                                        | 1.48 | 2.07 | 0.46 |
| A_51_P214197 | NM_133810 Stk17b    | 98267  | serine/threonine kinase 17b (apoptosis-inducing)                                                                   | 2.05 | 2.07 | 0.03 |
| A_52_P2923   | NM_019581 Gtpbp2    | 56055  | GTP binding protein 2                                                                                              | 2.02 | 2.07 | 0.04 |
| A_51_P503261 | NM_133897 Lrrc8c    | 100604 | leucine rich repeat containing 8 family, member C                                                                  | 1.95 | 2.07 | 0.05 |
| A_51_P413111 | AK147389 Ppm1l      | 242083 | protein phosphatase 1 (formerly 2C)-like<br>macrophage stimulating 1 receptor (c-met-related                       | 1.82 | 2.07 | 0.09 |
| A_51_P110672 | NM_009074 Mst1r     | 19882  | tyrosine kinase)                                                                                                   | 1.69 | 2.07 | 0.17 |
| A_51_P414548 | NM_007611 Casp7     | 12369  | caspase 7                                                                                                          | 1.90 | 2.07 | 0.06 |
| A_51_P341130 | NM_016721 Iqgap1    | 29875  | IQ motif containing GTPase activating protein 1                                                                    | 2.10 | 2.07 | 0.03 |
| A_52_P626756 | NM_027296 Trnt1     | 70047  | tRNA nucleotidyl transferase, CCA-adding, 1                                                                        | 2.13 | 2.06 | 0.02 |
| A_51_P142515 | NM_133738 Antxr2    | 71914  | anthrax toxin receptor 2<br>phosphatidylinositol 3-kinase, C2 domain containing,                                   | 2.25 | 2.06 | 0.01 |
| A_52_P364232 | NM_011083 Pik3c2a   | 18704  | alpha polypeptide                                                                                                  | 1.66 | 2.06 | 0.20 |
| A_51_P513573 | NM_145603 Ces2      | 234671 | carboxylesterase 2                                                                                                 | 1.80 | 2.06 | 0.11 |
| A_52_P424847 | NM_013685 Tcf4      | 21413  | transcription factor 4                                                                                             | 2.52 | 2.06 | 0.00 |
| A_51_P516756 | NM_010434 Hipk3     | 15259  | homeodomain interacting protein kinase 3                                                                           | 2.44 | 2.06 | 0.01 |
| A_52_P434055 | BC011338 Birc3      | 11796  | baculoviral IAP repeat-containing 3                                                                                | 2.33 | 2.06 | 0.01 |
| A_51_P166648 | NM_027627 4931408AC | 70967  | RIKEN cDNA 4931408A02 gene                                                                                         | 1.69 | 2.06 | 0.18 |
| A_52_P152847 | NM_008381 Inhbb     | 16324  | inhibin beta-B                                                                                                     | 1.76 | 2.06 | 0.13 |
| A_52_P173402 | AK163619 Slc4a4     | 54403  | solute carrier family 4 (anion exchanger), member 4                                                                | 1.52 | 2.06 | 0.40 |
| A_51_P107599 | NM_008541 Smad5     | 17129  | MAD homolog 5 ( <i>Drosophila</i> )                                                                                | 2.48 | 2.06 | 0.00 |
| A_51_P513504 | NM_016810 Gosr1     | 53334  | golgi SNAP receptor complex member 1<br>transporter 2, ATP-binding cassette, sub-family B                          | 2.19 | 2.05 | 0.02 |
| A_52_P86176  | NM_011530 Tap2      | 21355  | (MDR/TAP)                                                                                                          | 1.84 | 2.05 | 0.09 |
| A_52_P260105 | NM_008548 Man1a     | 17155  | mannosidase 1, alpha                                                                                               | 1.57 | 2.05 | 0.30 |
| A_51_P367060 | NM_013562 lfrd1     | 15982  | interferon-related developmental regulator 1                                                                       | 2.09 | 2.05 | 0.03 |

|              |            |           |        |                                                                                                                                            |      |      |      |
|--------------|------------|-----------|--------|--------------------------------------------------------------------------------------------------------------------------------------------|------|------|------|
| A_52_P373251 | AK147497   | Atp11a    | 50770  | ATPase, class VI, type 11A                                                                                                                 | 1.65 | 2.05 | 0.20 |
| A_52_P109740 | NA         | NA        | NA     | NA                                                                                                                                         | 2.37 | 2.05 | 0.01 |
| A_51_P128929 | NM_020559  | Alas1     | 11655  | aminolevulinic acid synthase 1                                                                                                             | 1.99 | 2.05 | 0.04 |
| A_51_P151254 | NM_134060  | Slc35b3   | 108652 | solute carrier family 35, member B3                                                                                                        | 2.18 | 2.05 | 0.02 |
| A_51_P498866 | NM_053168  | Trim11    | 94091  | tripartite motif-containing 11                                                                                                             | 2.05 | 2.05 | 0.03 |
| A_51_P208152 | AK014460   | 3930402G2 | 665306 | RIKEN cDNA 3930402G23 gene                                                                                                                 | 1.99 | 2.05 | 0.04 |
| A_51_P135944 | M92418     | Stfa2     | 20862  | stefin A2                                                                                                                                  | 2.08 | 2.05 | 0.03 |
| A_51_P209527 | NM_009740  | Bcl10     | 12042  | B-cell leukemia/lymphoma 10                                                                                                                | 2.38 | 2.05 | 0.01 |
| A_52_P239834 | NM_011210  | Ptpcr     | 19264  | protein tyrosine phosphatase, receptor type, C<br>regulator of chromosome condensation (RCC1) and BTB<br>(POZ) domain containing protein 2 | 1.76 | 2.04 | 0.13 |
| A_51_P138185 | NM_134083  | Rcbtb2    | 105670 | (POZ) domain containing protein 2                                                                                                          | 2.07 | 2.04 | 0.03 |
| A_52_P247974 | NA         | NA        | NA     | NA                                                                                                                                         | 1.73 | 2.04 | 0.15 |
| A_52_P556290 | NM_019927  | Arih1     | 23806  | ariadne ubiquitin-conjugating enzyme E2 binding<br>protein homolog 1 (Drosophila)                                                          | 1.94 | 2.04 | 0.05 |
| A_51_P201338 | NM_144800  | Mtss1     | 211401 | metastasis suppressor 1                                                                                                                    | 2.14 | 2.04 | 0.02 |
| A_52_P370274 | AK171700   | Pde4b     | 18578  | phosphodiesterase 4B, cAMP specific                                                                                                        | 1.53 | 2.04 | 0.37 |
| A_52_P451485 | NM_172496  | Cobl      | 12808  | cordon-bleu                                                                                                                                | 1.82 | 2.04 | 0.10 |
| A_52_P592120 | NM_027569  | Spag9     | 70834  | sperm associated antigen 9                                                                                                                 | 1.73 | 2.04 | 0.15 |
| A_51_P170371 | NM_031165  | Hspa8     | 15481  | heat shock protein 8                                                                                                                       | 2.10 | 2.04 | 0.02 |
| A_52_P570690 | NM_013415  | Atp1b2    | 11932  | ATPase, Na <sup>+</sup> /K <sup>+</sup> transporting, beta 2 polypeptide                                                                   | 1.78 | 2.03 | 0.12 |
| A_51_P472857 | NM_146614  | Olfr971   | 258607 | olfactory receptor 971                                                                                                                     | 1.69 | 2.03 | 0.18 |
| A_52_P627327 | XM_0010037 | NA        | NA     | NA                                                                                                                                         | 2.20 | 2.03 | 0.01 |
| A_51_P104418 | NM_022019  | Dusp10    | 63953  | dual specificity phosphatase 10<br>leukocyte immunoglobulin-like receptor, subfamily A<br>(with TM domain), member 6                       | 1.67 | 2.03 | 0.20 |
| A_52_P601383 | NM_011090  | Lilra6    | 18726  | LysM, putative peptidoglycan-binding, domain<br>containing 3                                                                               | 1.86 | 2.03 | 0.07 |
| A_52_P91618  | NM_030257  | Lysmd3    | 80289  | containing 3                                                                                                                               | 2.01 | 2.03 | 0.04 |
| A_51_P411297 | NM_016714  | Nup50     | 18141  | nucleoporin 50                                                                                                                             | 2.65 | 2.03 | 0.00 |
| A_51_P469433 | NM_011659  | Tnfrsf4   | 22163  | tumor necrosis factor receptor superfamily, member 4                                                                                       | 1.84 | 2.03 | 0.09 |
| A_52_P668478 | NM_146002  | Rhbdd2    | 215160 | rhomboid domain containing 2<br>1-acylglycerol-3-phosphate O-acyltransferase 4<br>(lysophosphatidic acid acyltransferase, delta)           | 2.04 | 2.03 | 0.03 |
| A_51_P346165 | NM_026644  | Agpat4    | 68262  | (lysophosphatidic acid acyltransferase, delta)                                                                                             | 1.78 | 2.03 | 0.12 |
| A_52_P414013 | NM_153511  | Il1f9     | 215257 | interleukin 1 family, member 9                                                                                                             | 2.15 | 2.03 | 0.02 |

|              |           |                 |        |                                                                                                   |      |      |      |
|--------------|-----------|-----------------|--------|---------------------------------------------------------------------------------------------------|------|------|------|
| A_51_P157112 | NM_008458 | Serpina3c       | 16625  | serine (or cysteine) peptidase inhibitor, clade A, member 3C                                      | 1.54 | 2.03 | 0.34 |
| A_52_P307938 | NM_001077 | Pik3r1          | 18708  | phosphatidylinositol 3-kinase, regulatory subunit, polypeptide 1 (p85 alpha)                      | 2.04 | 2.03 | 0.03 |
| A_52_P644020 | AK031720  | Fem1c           | 240263 | fem-1 homolog c (C.elegans)                                                                       | 1.70 | 2.03 | 0.17 |
| A_52_P131367 | NM_028864 | Zc3hav1         | 78781  | zinc finger CCCH type, antiviral 1                                                                | 1.73 | 2.03 | 0.15 |
| A_51_P294970 | NM_172606 | 6-Mar           | 223455 | membrane-associated ring finger (C3HC4) 6                                                         | 2.00 | 2.03 | 0.04 |
| A_51_P516860 | AK122234  | Rapgef5         | 217944 | Rap guanine nucleotide exchange factor (GEF) 5                                                    | 2.52 | 2.02 | 0.00 |
| A_51_P497875 | NM_026489 | Hormad1         | 67981  | HORMA domain containing 1                                                                         | 1.84 | 2.02 | 0.09 |
| A_51_P456941 | NM_010500 | Ier5            | 15939  | immediate early response 5                                                                        | 1.59 | 2.02 | 0.27 |
| A_52_P443435 | AK084997  | B930095G1320268 |        | RIKEN cDNA B930095G15 gene                                                                        | 1.68 | 2.02 | 0.18 |
| A_51_P304469 | NM_011504 | Stxbp3a         | 20912  | syntaxin binding protein 3A                                                                       | 1.95 | 2.02 | 0.05 |
| A_52_P92121  | AK053456  | Ankrd33b        | 67434  | ankyrin repeat domain 33B                                                                         | 1.33 | 2.02 | 0.91 |
| A_52_P636038 | NM_016694 | Park2           | 50873  | Parkinson disease (autosomal recessive, juvenile) 2, parkin                                       | 1.41 | 2.02 | 0.61 |
| A_52_P398998 | NM_010279 | Gfra1           | 14585  | glial cell line derived neurotrophic factor family receptor alpha 1                               | 1.66 | 2.02 | 0.20 |
| A_51_P383140 | NM_009289 | Slk             | 20874  | STE20-like kinase (yeast)                                                                         | 1.81 | 2.02 | 0.11 |
| A_52_P510706 | NM_019794 | Dnaja2          | 56445  | Dnaj (Hsp40) homolog, subfamily A, member 2                                                       | 1.69 | 2.02 | 0.17 |
| A_51_P131661 | NM_024182 | Riok3           | 66878  | RIO kinase 3 (yeast)                                                                              | 1.75 | 2.02 | 0.14 |
| A_52_P407220 | NM_146194 | Picalm          | 233489 | phosphatidylinositol binding clathrin assembly protein                                            | 1.57 | 2.02 | 0.30 |
| A_52_P207203 | NM_053124 | Smarca5         | 93762  | SWI/SNF related, matrix associated, actin dependent regulator of chromatin, subfamily a, member 5 | 2.05 | 2.02 | 0.03 |
| A_51_P137029 | NM_019588 | Plce1           | 74055  | phospholipase C, epsilon 1                                                                        | 1.97 | 2.01 | 0.04 |
| A_52_P151467 | NM_027498 | Sik3            | 70661  | SIK family kinase 3                                                                               | 1.52 | 2.01 | 0.37 |
| A_52_P23379  | NM_144804 | Depdc7          | 211896 | DEP domain containing 7                                                                           | 2.75 | 2.01 | 0.00 |
| A_52_P338698 | AK050066  | Pzp             | 11287  | pregnancy zone protein                                                                            | 1.49 | 2.01 | 0.44 |
| A_52_P81252  | NM_172599 | D14Ertd43i      | 218978 | DNA segment, Chr 14, ERATO Doi 436, expressed                                                     | 1.81 | 2.01 | 0.11 |
| A_51_P487941 | NM_183286 | Dhrs13          | 70451  | dehydrogenase/reductase (SDR family) member 13                                                    | 1.87 | 2.01 | 0.07 |
| A_51_P480209 | NM_007889 | Dvl3            | 13544  | dishevelled 3, dsh homolog (Drosophila)                                                           | 2.01 | 2.01 | 0.04 |
| A_51_P258381 | BC010717  | Kdm5a           | 214899 | lysine (K)-specific demethylase 5A                                                                | 1.84 | 2.01 | 0.09 |

|              |           |            |        |                                                     |      |      |      |
|--------------|-----------|------------|--------|-----------------------------------------------------|------|------|------|
| A_52_P932831 | NA        | NA         | NA     | NA                                                  | 1.43 | 2.01 | 0.58 |
|              |           |            |        | transducin-like enhancer of split 1, homolog of     |      |      |      |
| A_52_P330694 | AY155196  | Tle1       | 21885  | Drosophila E(spl)                                   | 2.19 | 2.01 | 0.02 |
| A_52_P558411 | NM_010833 | Msn        | 17698  | moesin                                              | 1.70 | 2.01 | 0.17 |
| A_51_P380260 | NM_008448 | Kif5b      | 16573  | kinesin family member 5B                            | 1.77 | 2.01 | 0.12 |
| A_52_P383066 | AB022307  | Il15       | 16168  | interleukin 15                                      | 2.33 | 2.01 | 0.01 |
| A_52_P384931 | AK158516  | Usp3       | 235441 | ubiquitin specific peptidase 3                      | 1.32 | 2.01 | 0.91 |
| A_51_P288193 | NM_007569 | Btg1       | 12226  | B-cell translocation gene 1, anti-proliferative     | 1.67 | 2.01 | 0.20 |
| A_51_P172231 | NM_026960 | Gsdmd      | 69146  | gasdermin D                                         | 2.08 | 2.01 | 0.03 |
| A_51_P405956 | NA        | NA         | NA     | NA                                                  | 1.81 | 2.01 | 0.10 |
|              |           |            |        | potassium channel tetramerisation domain containing |      |      |      |
| A_52_P266065 | NM_177715 | Kctd12     | 239217 | 12                                                  | 1.80 | 2.01 | 0.11 |
| A_51_P293489 | NM_139065 | Rbm47      | 245945 | RNA binding motif protein 47                        | 2.28 | 2.01 | 0.01 |
| A_51_P114966 | NM_026317 | Prss37     | 67690  | protease, serine, 37                                | 2.39 | 2.01 | 0.01 |
| A_52_P497625 | AK041324  | A630001G21 | 319997 | RIKEN cDNA A630001G21 gene                          | 2.27 | 2.00 | 0.01 |
| A_52_P317524 | NM_153165 | Klhl15     | 236904 | kelch-like 15 (Drosophila)                          | 1.90 | 2.00 | 0.07 |
|              |           |            |        | COX18 cytochrome c oxidase assembly homolog (S.     |      |      |      |
| A_52_P665768 | NM_001033 | Cox18      | 231430 | cerevisiae)                                         | 1.95 | 2.00 | 0.05 |
| A_51_P189292 | NM_138657 | Socs7      | 192157 | suppressor of cytokine signaling 7                  | 1.87 | 2.00 | 0.07 |
|              |           |            |        |                                                     |      |      |      |
| A_51_P273800 | NM_018760 | Slc4a4     | 54403  | solute carrier family 4 (anion exchanger), member 4 | 1.89 | 2.00 | 0.07 |
| A_51_P236656 | NM_029943 | Apex2      | 77622  | apurinic/aprimidinic endonuclease 2                 | 2.31 | 2.00 | 0.01 |
| A_52_P411780 | NM_024124 | Hdac9      | 79221  | histone deacetylase 9                               | 1.59 | 2.00 | 0.28 |
| A_52_P14496  | AK132653  | Gm9880     | 1E+08  | predicted gene 9880                                 | 2.40 | 2.00 | 0.01 |
| A_51_P179604 | NM_010282 | Ggps1      | 14593  | geranylgeranyl diphosphate synthase 1               | 2.13 | 2.00 | 0.02 |
| A_51_P172292 | NM_018746 | Itih4      | 16427  | inter alpha-trypsin inhibitor, heavy chain 4        | 1.73 | 2.00 | 0.15 |
| A_52_P223083 | BC050264  | Pfkip      | 56421  | phosphofructokinase, platelet                       | 2.22 | 2.00 | 0.01 |
| A_51_P391328 | NM_030236 | Fbxo34     | 78938  | F-box protein 34                                    | 1.63 | 2.00 | 0.22 |
| A_51_P119932 | NM_175164 | Arhgap26   | 71302  | Rho GTPase activating protein 26                    | 1.64 | 2.00 | 0.21 |
|              |           |            |        |                                                     |      |      |      |
| A_52_P62270  | NM_026045 | Prpf18     | 67229  | PRP18 pre-mRNA processing factor 18 homolog (yeast) | 1.83 | 2.00 | 0.09 |
| A_52_P424037 | NM_019553 | Ddx21      | 56200  | DEAD (Asp-Glu-Ala-Asp) box polypeptide 21           | 2.28 | 2.00 | 0.01 |
| A_51_P117226 | NA        | NA         | NA     | NA                                                  | 2.08 | 2.00 | 0.03 |
| A_51_P253883 | NM_029758 | Fam49a     | 76820  | family with sequence similarity 49, member A        | 1.70 | 2.00 | 0.16 |

|               |           |            |        |                                                                                          |      |      |      |
|---------------|-----------|------------|--------|------------------------------------------------------------------------------------------|------|------|------|
| A_52_P381665  | AK030884  | Aff1       | 17355  | AF4/FMR2 family, member 1                                                                | 2.28 | 2.00 | 0.01 |
| A_52_P4538    | NM_009370 | Tgfbr1     | 21812  | transforming growth factor, beta receptor I                                              | 1.31 | 2.00 | 0.97 |
| A_51_P326051  | AK152714  | 2010106G01 | 66552  | RIKEN cDNA 2010106G01 gene                                                               | 1.83 | 1.99 | 0.09 |
| A_51_P494361  | NM_175341 | Mbnl2      | 105559 | muscleblind-like 2                                                                       | 2.19 | 1.99 | 0.02 |
| A_51_P130957  | NM_030198 | Gins3      | 78833  | GIN5 complex subunit 3 (Psf3 homolog)                                                    | 1.84 | 1.99 | 0.09 |
| A_52_P184383  | NM_007508 | Atp6v1a    | 11964  | ATPase, H+ transporting, lysosomal V1 subunit A                                          | 1.92 | 1.99 | 0.06 |
| A_52_P3304    | NM_080446 | Helb       | 117599 | helicase (DNA) B                                                                         | 1.61 | 1.99 | 0.24 |
| A_51_P174943  | NM_008485 | Lamc2      | 16782  | laminin, gamma 2                                                                         | 1.78 | 1.99 | 0.12 |
| A_51_P189151  | AK028396  | Kbtbd2     | 210973 | kelch repeat and BTB (POZ) domain containing 2                                           | 2.32 | 1.99 | 0.01 |
| A_51_P314701  | NM_011180 | Cyth1      | 19157  | cytohesin 1                                                                              | 1.51 | 1.99 | 0.40 |
| A_52_P287456  | NM_145523 | Gca        | 227960 | grancalcin                                                                               | 2.39 | 1.99 | 0.01 |
| A_51_P520310  | NM_007440 | Alox12     | 11684  | arachidonate 12-lipoxygenase                                                             | 2.00 | 1.99 | 0.04 |
| A_51_P469817  | AK163070  | A630052E07 | 320726 | RIKEN cDNA A630052E07 gene                                                               | 1.72 | 1.99 | 0.15 |
| A_51_P190765  | NM_025517 | Rtcd1      | 66368  | RNA terminal phosphate cyclase domain 1                                                  | 2.33 | 1.99 | 0.01 |
| A_52_P582555  | NM_172991 | C030048B08 | 269623 | RIKEN cDNA C030048B08 gene                                                               | 1.70 | 1.99 | 0.17 |
| A_51_P308469  | NM_011884 | Rngtt      | 24018  | RNA guanylyltransferase and 5'-phosphatase                                               | 1.99 | 1.99 | 0.04 |
| A_52_P1077588 | XM_902919 | NA         | NA     | NA                                                                                       | 1.87 | 1.99 | 0.07 |
| A_51_P122017  | NM_001017 | Kdm6b      | 216850 | KDM1 lysine (K)-specific demethylase 6B                                                  | 1.77 | 1.99 | 0.12 |
| A_51_P388412  | NM_010016 | Cd55       | 13136  | CD55 antigen                                                                             | 2.08 | 1.99 | 0.03 |
| A_52_P134158  | NM_024182 | Riok3      | 66878  | RIO kinase 3 (yeast)                                                                     | 1.95 | 1.99 | 0.05 |
| A_52_P556355  | NA        | NA         | NA     | NA                                                                                       | 1.44 | 1.98 | 0.55 |
| A_51_P259378  | NM_030743 | Rnf114     | 81018  | ring finger protein 114                                                                  | 1.88 | 1.98 | 0.07 |
| A_51_P488789  | AK137262  | Cdk12      | 69131  | cyclin-dependent kinase 12                                                               | 1.43 | 1.98 | 0.58 |
| A_52_P637829  | NM_080558 | Ssfa2      | 70599  | sperm specific antigen 2                                                                 | 1.35 | 1.98 | 0.82 |
| A_51_P115768  | BB354941  | NA         | NA     | NA                                                                                       | 1.66 | 1.98 | 0.20 |
| A_51_P200277  | NM_023475 | Serhl      | 68607  | serine hydrolase-like                                                                    | 2.00 | 1.98 | 0.04 |
| A_51_P466858  | NM_001039 | Asxl1      | 228790 | additional sex combs like 1 (Drosophila)                                                 | 2.07 | 1.98 | 0.03 |
| A_52_P292528  | NM_023603 | Sfpq       | 71514  | splicing factor proline/glutamine rich (polypyrimidine tract binding protein associated) | 2.19 | 1.98 | 0.02 |
| A_52_P218976  | NM_173369 | Cyld       | 74256  | cylindromatosis (turban tumor syndrome)                                                  | 1.84 | 1.98 | 0.09 |
| A_51_P193925  | AK011505  | Mapk6      | 50772  | mitogen-activated protein kinase 6                                                       | 1.84 | 1.98 | 0.09 |
| A_52_P399580  | NM_013499 | Cr1l       | 12946  | complement component (3b/4b) receptor 1-like                                             | 2.31 | 1.98 | 0.01 |
| A_51_P488340  | NM_016715 | Crlf2      | 57914  | cytokine receptor-like factor 2                                                          | 1.63 | 1.98 | 0.22 |
| A_51_P157994  | NM_001037 | Dab2       | 13132  | disabled homolog 2 (Drosophila)                                                          | 1.71 | 1.98 | 0.16 |

|              |           |                 |        |                                                                                |      |      |      |
|--------------|-----------|-----------------|--------|--------------------------------------------------------------------------------|------|------|------|
| A_52_P235064 | AY550908  | Ubr5            | 70790  | ubiquitin protein ligase E3 component n-recognin 5                             | 1.68 | 1.98 | 0.18 |
| A_51_P131168 | NM_001012 | Ccdc55          | 237859 | coiled-coil domain containing 55                                               | 2.09 | 1.98 | 0.03 |
| A_52_P153541 | AK172642  | Bfar            | 67118  | bifunctional apoptosis regulator                                               | 2.06 | 1.98 | 0.03 |
| A_51_P129787 | NM_025793 | Wdr45l          | 66840  | Wdr45 like                                                                     | 2.57 | 1.98 | 0.00 |
| A_52_P885203 | CF582774  | Rnasel          | 24014  | ribonuclease L (2', 5'-oligoadenylate synthetase-dependent)                    | 2.25 | 1.97 | 0.01 |
| A_51_P432820 | BC019382  | NA              | NA     | NA                                                                             | 1.71 | 1.97 | 0.16 |
| A_52_P402897 | AK038529  | Cdh4            | 12561  | cadherin 4                                                                     | 1.62 | 1.97 | 0.22 |
| A_52_P636394 | NM_172606 | 6-Mar           | 223455 | membrane-associated ring finger (C3HC4) 6                                      | 1.80 | 1.97 | 0.11 |
| A_52_P467690 | NM_175836 | Spnb2           | 20742  | spectrin beta 2                                                                | 1.77 | 1.97 | 0.12 |
| A_52_P458229 | AK129078  | Rrp1b           | 72462  | ribosomal RNA processing 1 homolog B ( <i>S. cerevisiae</i> )                  | 1.78 | 1.97 | 0.12 |
| A_51_P430445 | NM_026454 | Ube2f           | 67921  | ubiquitin-conjugating enzyme E2F (putative)                                    | 2.08 | 1.97 | 0.03 |
| A_52_P305279 | AK151394  | Spata13         | 219140 | spermatogenesis associated 13                                                  | 2.41 | 1.97 | 0.01 |
| A_52_P92689  | NA        | NA              | NA     | NA                                                                             | 1.77 | 1.97 | 0.13 |
| A_52_P923956 | AK085397  | NA              | NA     | NA                                                                             | 1.75 | 1.97 | 0.14 |
| A_51_P129285 | NM_144836 | Slc17a2         | 218103 | solute carrier family 17 (sodium phosphate), member 2                          | 1.62 | 1.97 | 0.22 |
| A_51_P471177 | NM_009291 | Strat6          | 20897  | stimulated by retinoic acid gene 6                                             | 1.39 | 1.97 | 0.67 |
| A_51_P384609 | BC080729  | Ddx10           | 77591  | DEAD (Asp-Glu-Ala-Asp) box polypeptide 10                                      | 2.12 | 1.97 | 0.02 |
| A_51_P130773 | NM_009613 | Adam11          | 11488  | a disintegrin and metallopeptidase domain 11                                   | 1.46 | 1.97 | 0.53 |
| A_52_P642801 | XM_618738 | Lats1           | 16798  | large tumor suppressor                                                         | 1.92 | 1.97 | 0.06 |
| A_51_P144285 | BC058403  | Rps6kc1         | 320119 | ribosomal protein S6 kinase polypeptide 1                                      | 1.92 | 1.97 | 0.06 |
| A_52_P251703 | D28599    | Vcan            | 13003  | versican                                                                       | 1.78 | 1.97 | 0.12 |
| A_52_P77764  | NM_007514 | Slc7a2          | 11988  | solute carrier family 7 (cationic amino acid transporter, y+ system), member 2 | 1.77 | 1.97 | 0.12 |
| A_52_P106259 | NM_207655 | Egfr            | 13649  | epidermal growth factor receptor                                               | 1.72 | 1.97 | 0.15 |
| A_52_P440044 | NM_025780 | Thap2           | 66816  | THAP domain containing, apoptosis associated protein 2                         | 1.93 | 1.97 | 0.05 |
| A_51_P301566 | NM_008872 | Plat            | 18791  | plasminogen activator, tissue                                                  | 1.50 | 1.97 | 0.44 |
| A_51_P356525 | NM_177240 | D030016E1320714 |        | RIKEN cDNA D030016E14 gene                                                     | 1.79 | 1.97 | 0.11 |
| A_51_P209280 | NM_133685 | Rab31           | 106572 | RAB31, member RAS oncogene family                                              | 2.45 | 1.97 | 0.01 |
| A_52_P281941 | NM_178395 | Zdhhc2          | 70546  | zinc finger, DHHC domain containing 2                                          | 2.06 | 1.96 | 0.03 |



|               |            |            |        |                                                              |      |      |      |
|---------------|------------|------------|--------|--------------------------------------------------------------|------|------|------|
| A_52_P171019  | NM_008548  | Man1a      | 17155  | mannosidase 1, alpha                                         | 1.44 | 1.96 | 0.55 |
| A_52_P1012802 | NM_008982  | Ptprj      | 19271  | protein tyrosine phosphatase, receptor type, J               | 2.48 | 1.96 | 0.00 |
| A_51_P457980  | NA         | NA         | NA     | NA                                                           | 1.91 | 1.96 | 0.06 |
| A_51_P204860  | NM_026221  | Ppfibp1    | 67533  | PTPRF interacting protein, binding protein 1 (liprin beta 1) | 2.01 | 1.96 | 0.04 |
| A_52_P20482   | NM_144835  | Heatr1     | 217995 | HEAT repeat containing 1                                     | 1.87 | 1.96 | 0.07 |
| A_52_P437662  | NM_013884  | Cspg5      | 29873  | chondroitin sulfate proteoglycan 5                           | 1.71 | 1.96 | 0.15 |
| A_51_P287635  | NM_008773  | P2ry2      | 18442  | purinergic receptor P2Y, G-protein coupled 2                 | 1.82 | 1.96 | 0.10 |
| A_52_P182118  | NA         | NA         | NA     | NA                                                           | 2.18 | 1.96 | 0.02 |
| A_51_P458866  | NM_172647  | F11r       | 16456  | F11 receptor                                                 | 1.36 | 1.96 | 0.77 |
| A_52_P116006  | NM_010266  | Gda        | 14544  | guanine deaminase                                            | 2.55 | 1.96 | 0.00 |
| A_52_P483339  | AK036738   | Aars       | 234734 | alanyl-tRNA synthetase                                       | 2.32 | 1.96 | 0.01 |
| A_52_P155849  | NM_001039! | Arl4a      | 11861  | ADP-ribosylation factor-like 4A                              | 1.86 | 1.96 | 0.07 |
| A_51_P295355  | NM_011957  | Creb3l1    | 26427  | cAMP responsive element binding protein 3-like 1             | 2.17 | 1.96 | 0.02 |
| A_52_P549405  | NM_001039! | Asxl1      | 228790 | additional sex combs like 1 (Drosophila)                     | 2.25 | 1.96 | 0.01 |
| A_52_P221900  | NM_177325  | Tsr1       | 104662 | TSR1, 20S rRNA accumulation, homolog (yeast)                 | 2.07 | 1.96 | 0.03 |
| A_51_P152765  | NM_011488  | Stat5a     | 20850  | signal transducer and activator of transcription 5A          | 1.48 | 1.96 | 0.46 |
| A_51_P246727  | BC067045   | Mlxip      | 208104 | MLX interacting protein                                      | 1.69 | 1.96 | 0.17 |
| A_51_P396045  | NM_010704  | Lepr       | 16847  | leptin receptor                                              | 2.11 | 1.96 | 0.02 |
| A_52_P621588  | NM_174851  | Il28ra     | 242700 | interleukin 28 receptor alpha                                | 1.94 | 1.96 | 0.05 |
| A_52_P223853  | XM_001006  | NA         | NA     | NA                                                           | 1.29 | 1.95 | 1.04 |
| A_51_P325173  | AK077713   | Tpm1       | 22003  | tropomyosin 1, alpha                                         | 1.30 | 1.95 | 0.97 |
| A_51_P172573  | NM_013671  | Sod2       | 20656  | superoxide dismutase 2, mitochondrial                        | 2.35 | 1.95 | 0.01 |
| A_52_P392701  | NM_011112  | Papola     | 18789  | poly (A) polymerase alpha                                    | 1.77 | 1.95 | 0.12 |
| A_51_P314363  | AK084643   | NA         | NA     | NA                                                           | 2.33 | 1.95 | 0.01 |
| A_51_P476579  | XM_985042  | NA         | NA     | NA                                                           | 2.35 | 1.95 | 0.01 |
| A_52_P112816  | NM_019501  | Pdss1      | 56075  | prenyl (solanesyl) diphosphate synthase, subunit 1           | 2.05 | 1.95 | 0.03 |
| A_52_P334808  | NM_178417  | Zfp867     | 237775 | zinc finger protein 867                                      | 2.11 | 1.95 | 0.02 |
| A_51_P149349  | BC022652   | Nfxl1      | 100978 | nuclear transcription factor, X-box binding-like 1           | 1.62 | 1.95 | 0.22 |
| A_52_P463962  | NM_183296  | Krtap16-10 | 71369  | keratin associated protein 16-10                             | 2.29 | 1.95 | 0.01 |
| A_51_P116946  | NM_080467  | Atp6v0a4   | 140494 | ATPase, H+ transporting, lysosomal V0 subunit A4             | 1.89 | 1.95 | 0.07 |

|              |           |           |        |                                                                                                                                                       |      |      |      |
|--------------|-----------|-----------|--------|-------------------------------------------------------------------------------------------------------------------------------------------------------|------|------|------|
| A_51_P138790 | NM_175175 | Plekhhf2  | 71801  | pleckstrin homology domain containing, family F (with FYVE domain) member 2                                                                           | 1.57 | 1.95 | 0.30 |
| A_52_P569001 | BC054531  | Atp2a2    | 11938  | ATPase, Ca <sup>++</sup> transporting, cardiac muscle, slow twitch 2                                                                                  | 1.54 | 1.95 | 0.34 |
| A_51_P520378 | NM_007502 | Atp1b3    | 11933  | ATPase, Na <sup>+</sup> /K <sup>+</sup> transporting, beta 3 polypeptide                                                                              | 1.93 | 1.95 | 0.05 |
| A_52_P621691 | NM_153384 | Clrn1     | 229320 | clarin 1                                                                                                                                              | 1.52 | 1.95 | 0.40 |
| A_51_P281333 | NM_018784 | St3gal6   | 54613  | ST3 beta-galactoside alpha-2,3-sialyltransferase 6 cat eye syndrome chromosome region, candidate 2                                                    | 2.18 | 1.95 | 0.02 |
| A_52_P260468 | AK037032  | Cecr2     | 330409 | homolog (human)                                                                                                                                       | 2.19 | 1.95 | 0.02 |
| A_52_P218100 | AK086477  | Sh3glb1   | 54673  | SH3-domain GRB2-like B1 (endophilin) sema domain, immunoglobulin domain (Ig), transmembrane domain (TM) and short cytoplasmic domain, (semaphorin) 4C | 2.61 | 1.95 | 0.00 |
| A_52_P659904 | S79463    | Sema4c    | 20353  | forkhead box K1                                                                                                                                       | 2.21 | 1.94 | 0.01 |
| A_51_P356413 | NM_199068 | Foxk1     | 17425  | COX18 cytochrome c oxidase assembly homolog (S. cerevisiae)                                                                                           | 2.23 | 1.94 | 0.01 |
| A_52_P665767 | NM_001033 | Cox18     | 231430 | AT rich interactive domain 1B (SWI-like)                                                                                                              | 2.10 | 1.94 | 0.03 |
| A_51_P445555 | XM_139711 | Arid1b    | 239985 | RNA binding protein gene with multiple splicing                                                                                                       | 2.30 | 1.94 | 0.01 |
| A_52_P662203 | AF148511  | Rbpms     | 19663  | pogo transposable element with KRAB domain                                                                                                            | 1.74 | 1.94 | 0.15 |
| A_52_P499683 | AK122520  | Pogk      | 71592  | SAR1 gene homolog A (S. cerevisiae)                                                                                                                   | 2.15 | 1.94 | 0.02 |
| A_51_P202498 | NM_009120 | Sar1a     | 20224  | phospholipase C, beta 1                                                                                                                               | 2.39 | 1.94 | 0.01 |
| A_52_P18262  | BC058710  | Plcb1     | 18795  | checkpoint kinase 1 homolog (S. pombe)                                                                                                                | 2.31 | 1.94 | 0.01 |
| A_51_P326499 | NM_007691 | Chek1     | 12649  | transducin-like enhancer of split 4, homolog of Drosophila E(spl)                                                                                     | 1.95 | 1.94 | 0.05 |
| A_51_P346543 | NM_011600 | Tle4      | 21888  | vacuolar protein sorting 13A (yeast)                                                                                                                  | 1.60 | 1.94 | 0.27 |
| A_51_P130874 | AK084751  | Vps13a    | 271564 | PHD finger protein 6                                                                                                                                  | 2.14 | 1.94 | 0.02 |
| A_52_P571457 | NM_027642 | Phf6      | 70998  | dermatan sulfate epimerase                                                                                                                            | 1.68 | 1.94 | 0.18 |
| A_51_P386670 | NM_172508 | Dse       | 212898 | RIKEN cDNA E130203B14 gene                                                                                                                            | 1.73 | 1.94 | 0.15 |
| A_52_P292213 | NM_178791 | E130203B1 | 320736 | lysophosphatidylcholine acyltransferase 2                                                                                                             | 1.47 | 1.94 | 0.50 |
| A_51_P169061 | NM_173014 | Lpcat2    | 270084 | endothelial cell-specific adhesion molecule                                                                                                           | 1.47 | 1.94 | 0.50 |
| A_51_P448325 | NM_027102 | Esam      | 69524  | tumor necrosis factor, alpha-induced protein 2                                                                                                        | 2.16 | 1.94 | 0.02 |
| A_51_P364485 | NM_009396 | Tnfaip2   | 21928  | RIKEN cDNA 2310014H01 gene                                                                                                                            | 1.48 | 1.94 | 0.50 |
| A_51_P118443 | AK051656  | 2310014HC | 76448  | transmembrane protein 192                                                                                                                             | 1.59 | 1.94 | 0.27 |
| A_51_P124803 | NM_028427 | Tmem192   | 73067  | transmembrane protein 184b                                                                                                                            | 2.14 | 1.94 | 0.02 |
| A_51_P224771 | NM_172608 | Tmem184b  | 223693 |                                                                                                                                                       | 1.77 | 1.94 | 0.12 |

|              |            |                |        |                                                                                |      |      |      |
|--------------|------------|----------------|--------|--------------------------------------------------------------------------------|------|------|------|
| A_52_P232580 | NM_145508  | Dyrk3          | 226419 | dual-specificity tyrosine-(Y)-phosphorylation regulated kinase 3               | 1.78 | 1.94 | 0.11 |
| A_51_P193176 | NM_146118  | Slc25a25       | 227731 | solute carrier family 25 (mitochondrial carrier, phosphate carrier), member 25 | 1.35 | 1.94 | 0.82 |
| A_51_P432544 | NM_010397  | H2-T22         | 15039  | histocompatibility 2, T region locus 22                                        | 1.93 | 1.93 | 0.05 |
| A_51_P220806 | NM_008110  | Gdf9           | 14566  | growth differentiation factor 9                                                | 2.17 | 1.93 | 0.02 |
| A_52_P548463 | NM_133365  | Dnahc5         | 110082 | dynein, axonemal, heavy chain 5                                                | 1.55 | 1.93 | 0.33 |
| A_51_P470981 | NM_134161  | Fut10          | 171167 | fucosyltransferase 10                                                          | 1.86 | 1.93 | 0.07 |
| A_52_P321150 | NM_023516  | 2310016C069573 |        | RIKEN cDNA 2310016C08 gene                                                     | 1.55 | 1.93 | 0.33 |
| A_51_P187645 | BC004786   | Igh-VJ558      | 16061  | immunoglobulin heavy chain (J558 family)                                       | 1.57 | 1.93 | 0.30 |
| A_51_P368237 | BC023155   | Dnahc1         | 110084 | dynein, axonemal, heavy chain 1                                                | 1.61 | 1.93 | 0.24 |
| A_52_P455055 | XM_148244  | NA             | NA     | NA                                                                             | 2.00 | 1.93 | 0.04 |
| A_52_P648750 | X56459     | Hoxb6          | 15414  | homeobox B6                                                                    | 2.07 | 1.93 | 0.03 |
| A_51_P117165 | AK018150   | 6330409D270730 |        | RIKEN cDNA 6330409D20 gene                                                     | 2.05 | 1.93 | 0.03 |
| A_51_P131408 | NM_013749  | Tnfrsf12a      | 27279  | tumor necrosis factor receptor superfamily, member 12a                         | 1.54 | 1.93 | 0.34 |
| A_51_P511480 | NM_028680  | Ift57          | 73916  | intraflagellar transport 57 homolog (Chlamydomonas)                            | 1.53 | 1.93 | 0.37 |
| A_52_P486774 | AK173076   | Cobl1          | 319876 | Cobl-like 1                                                                    | 1.46 | 1.93 | 0.53 |
| A_52_P99888  | NM_023158  | Cxcl16         | 66102  | chemokine (C-X-C motif) ligand 16                                              | 2.30 | 1.93 | 0.01 |
| A_52_P184052 | NM_001005! | Smg7           | 226517 | Smg-7 homolog, nonsense mediated mRNA decay factor (C. elegans)                | 1.89 | 1.93 | 0.07 |
| A_52_P370760 | NM_029035  | Spsb1          | 74646  | splA/ryanodine receptor domain and SOCS box containing 1                       | 2.14 | 1.93 | 0.02 |
| A_52_P133994 | NM_007924  | Ell            | 13716  | elongation factor RNA polymerase II                                            | 1.83 | 1.93 | 0.09 |
| A_52_P34806  | NM_008466  | Kpna3          | 16648  | karyopherin (importin) alpha 3                                                 | 2.14 | 1.92 | 0.02 |
| A_51_P305138 | NA         | NA             | NA     | NA                                                                             | 1.35 | 1.92 | 0.82 |
| A_52_P395962 | NM_001045! | NA             | NA     | NA                                                                             | 1.40 | 1.92 | 0.67 |
| A_52_P125467 | NM_144865  | Reep2          | 225362 | receptor accessory protein 2                                                   | 2.10 | 1.92 | 0.02 |
| A_52_P298093 | NM_023324  | Peli1          | 67245  | pellino 1                                                                      | 1.44 | 1.92 | 0.55 |
| A_51_P234359 | NM_011328  | Sct            | 20287  | secretin                                                                       | 1.65 | 1.92 | 0.20 |
| A_51_P484880 | NM_207680  | Bcl2l11        | 12125  | BCL2-like 11 (apoptosis facilitator)                                           | 2.51 | 1.92 | 0.00 |
| A_51_P107686 | NM_008592  | Foxc1          | 17300  | forkhead box C1                                                                | 2.47 | 1.92 | 0.00 |
| A_52_P682170 | NM_194262  | Arid4b         | 94246  | AT rich interactive domain 4B (RBP1-like)                                      | 1.81 | 1.92 | 0.11 |

|               |           |           |        |                                                                                                              |      |      |      |
|---------------|-----------|-----------|--------|--------------------------------------------------------------------------------------------------------------|------|------|------|
| A_52_P23413   | NM_172911 | D8Ert82e  | 244418 | DNA segment, Chr 8, ERATO Doi 82, expressed                                                                  | 1.91 | 1.92 | 0.06 |
| A_52_P315280  | NM_010918 | Nktr      | 18087  | natural killer tumor recognition sequence                                                                    | 1.89 | 1.92 | 0.07 |
| A_51_P302192  | NM_026102 | Daam1     | 208846 | dishevelled associated activator of morphogenesis 1                                                          | 1.83 | 1.92 | 0.09 |
| A_52_P1026777 | NM_001033 | Ecscr     | 68545  | endothelial cell-specific chemotaxis regulator                                                               | 2.15 | 1.92 | 0.02 |
| A_52_P567359  | NM_008541 | Smad5     | 17129  | MAD homolog 5 (Drosophila)                                                                                   | 1.88 | 1.92 | 0.07 |
| A_51_P297346  | NM_029153 | Scamp1    | 107767 | secretory carrier membrane protein 1                                                                         | 1.80 | 1.92 | 0.11 |
| A_52_P34979   | BC055805  | Epc1      | 13831  | enhancer of polycomb homolog 1 (Drosophila)                                                                  | 1.36 | 1.92 | 0.77 |
| A_52_P128612  | NA        | NA        | NA     | NA                                                                                                           | 1.77 | 1.92 | 0.13 |
| A_51_P160284  | NM_011552 | Tcof1     | 21453  | Treacher Collins Franceschetti syndrome 1, homolog                                                           | 1.86 | 1.92 | 0.07 |
| A_52_P290629  | AK083425  | Pkn2      | 109333 | protein kinase N2                                                                                            | 1.50 | 1.92 | 0.44 |
| A_51_P424959  | NM_007528 | Bcl6b     | 12029  | B-cell CLL/lymphoma 6, member B                                                                              | 2.07 | 1.92 | 0.03 |
| A_52_P492062  | XR_004049 | NA        | NA     | NA                                                                                                           | 1.86 | 1.92 | 0.07 |
| A_52_P82741   | NM_010479 | Hspa1a    | 193740 | heat shock protein 1A                                                                                        | 1.55 | 1.92 | 0.33 |
| A_51_P440242  | AK122520  | Pogk      | 71592  | pogo transposable element with KRAB domain                                                                   | 1.83 | 1.91 | 0.09 |
| A_52_P229411  | NA        | NA        | NA     | NA                                                                                                           | 2.22 | 1.91 | 0.01 |
| A_51_P195935  | BC067054  | Rprd2     | 75137  | regulation of nuclear pre-mRNA domain containing 2<br>KH domain containing, RNA binding, signal transduction | 1.49 | 1.91 | 0.44 |
| A_52_P199058  | NM_011317 | Khdrbs1   | 20218  | associated 1                                                                                                 | 1.62 | 1.91 | 0.22 |
| A_51_P332717  | NM_011673 | Ugcg      | 22234  | UDP-glucose ceramide glucosyltransferase                                                                     | 2.01 | 1.91 | 0.04 |
| A_51_P125679  | AK010725  | 2410076I2 | 73673  | RIKEN cDNA 2410076I21 gene<br>NIMA (never in mitosis gene a)-related expressed kinase                        | 1.31 | 1.91 | 0.97 |
| A_51_P347529  | NM_177898 | Nek5      | 330721 | 5                                                                                                            | 1.56 | 1.91 | 0.30 |
| A_51_P511810  | NM_001042 | Cd63      | 12512  | CD63 antigen                                                                                                 | 1.61 | 1.91 | 0.24 |
| A_52_P382149  | NM_007811 | Cyp26a1   | 13082  | cytochrome P450, family 26, subfamily a, polypeptide 1                                                       | 1.56 | 1.91 | 0.33 |
| A_51_P243755  | NM_011388 | Slc10a2   | 20494  | solute carrier family 10, member 2                                                                           | 1.33 | 1.91 | 0.91 |
| A_52_P630828  | NM_016721 | Iqgap1    | 29875  | IQ motif containing GTPase activating protein 1                                                              | 1.78 | 1.91 | 0.12 |
| A_52_P63044   | NM_019391 | Lsp1      | 16985  | lymphocyte specific 1                                                                                        | 1.75 | 1.91 | 0.14 |
| A_52_P43135   | AK168061  | Zfp259    | 22687  | zinc finger protein 259                                                                                      | 1.29 | 1.91 | 1.04 |
| A_51_P334804  | NM_029427 | Pnpla5    | 75772  | patatin-like phospholipase domain containing 5                                                               | 1.63 | 1.91 | 0.22 |
| A_52_P153957  | NM_019788 | Pldn      | 18457  | pallidin                                                                                                     | 1.83 | 1.91 | 0.09 |

|              |           |           |        |                                                                                 |      |      |      |
|--------------|-----------|-----------|--------|---------------------------------------------------------------------------------|------|------|------|
| A_51_P233768 | NM_054055 | Slc13a3   | 114644 | solute carrier family 13 (sodium-dependent dicarboxylate transporter), member 3 | 1.66 | 1.90 | 0.20 |
| A_51_P183481 | NM_013553 | Hoxc4     | 15423  | homeobox C4                                                                     | 1.91 | 1.90 | 0.06 |
| A_51_P140237 | NM_010212 | Fhl2      | 14200  | four and a half LIM domains 2                                                   | 1.58 | 1.90 | 0.28 |
| A_51_P174350 | NA        | NA        | NA     | NA                                                                              | 1.53 | 1.90 | 0.37 |
| A_51_P407774 | NM_019723 | Slc22a21  | 56517  | solute carrier family 22 (organic cation transporter), member 21                | 1.57 | 1.90 | 0.30 |
| A_52_P330395 | NM_134082 | Farp1     | 223254 | FERM, RhoGEF (Arhgef) and pleckstrin domain protein 1 (chondrocyte-derived)     | 1.98 | 1.90 | 0.04 |
| A_52_P410449 | NM_010215 | Il4i1     | 14204  | interleukin 4 induced 1                                                         | 1.78 | 1.90 | 0.12 |
| A_52_P149628 | NM_198862 | Nlgn2     | 216856 | neuroligin 2                                                                    | 1.81 | 1.90 | 0.11 |
| A_51_P114177 | NM_026947 | 1810022C2 | 69123  | RIKEN cDNA 1810022C2 gene                                                       | 1.70 | 1.90 | 0.17 |
| A_52_P522210 | NM_183428 | Epb4.1    | 269587 | erythrocyte protein band 4.1                                                    | 1.90 | 1.90 | 0.06 |
| A_52_P415116 | NM_021406 | Trem1     | 58217  | triggering receptor expressed on myeloid cells 1                                | 1.80 | 1.90 | 0.11 |
| A_51_P284946 | NM_028810 | Rnd3      | 74194  | Rho family GTPase 3                                                             | 1.96 | 1.90 | 0.04 |
| A_51_P125745 | NM_012055 | Asns      | 27053  | asparagine synthetase                                                           | 1.32 | 1.90 | 0.91 |
| A_52_P279143 | NM_019553 | Ddx21     | 56200  | DEAD (Asp-Glu-Ala-Asp) box polypeptide 21                                       | 1.68 | 1.89 | 0.18 |
| A_51_P176154 | AK054545  | Sirpb1    | 320832 | signal-regulatory protein beta 1                                                | 2.17 | 1.89 | 0.02 |
| A_51_P354804 | NM_080643 | Caskin2   | 140721 | CASK-interacting protein 2                                                      | 2.09 | 1.89 | 0.03 |
| A_51_P292943 | NM_007924 | Ell       | 13716  | elongation factor RNA polymerase II                                             | 1.85 | 1.89 | 0.07 |
| A_51_P328613 | NM_010188 | Fcgr3     | 14131  | Fc receptor, IgG, low affinity III                                              | 1.73 | 1.89 | 0.15 |
| A_51_P291950 | NM_010266 | Gda       | 14544  | guanine deaminase                                                               | 2.40 | 1.89 | 0.01 |
| A_52_P134530 | AK152971  | Rbm47     | 245945 | RNA binding motif protein 47                                                    | 2.07 | 1.89 | 0.03 |
| A_51_P293982 | NM_153119 | Plekho2   | 102595 | pleckstrin homology domain containing, family O member 2                        | 1.55 | 1.89 | 0.33 |
| A_52_P589023 | NM_027123 | Fastkd3   | 69577  | FAST kinase domains 3                                                           | 1.64 | 1.89 | 0.21 |
| A_51_P194099 | NM_009381 | Thrsp     | 21835  | thyroid hormone responsive SPOT14 homolog (Rattus)                              | 1.40 | 1.89 | 0.67 |
| A_52_P141322 | NM_010117 | Rhbdf1    | 13650  | rhomboid family 1 (Drosophila)                                                  | 2.03 | 1.89 | 0.04 |
| A_51_P260433 | NM_008976 | Ptpn14    | 19250  | protein tyrosine phosphatase, non-receptor type 14                              | 2.13 | 1.89 | 0.02 |
| A_52_P552194 | NM_133990 | Il13ra1   | 16164  | interleukin 13 receptor, alpha 1                                                | 1.42 | 1.89 | 0.61 |
| A_52_P205055 | XR_003742 | NA        | NA     | NA                                                                              | 2.14 | 1.89 | 0.02 |
| A_51_P139780 | NM_009402 | Pglyrp1   | 21946  | peptidoglycan recognition protein 1                                             | 1.30 | 1.89 | 1.04 |

|              |           |         |        |                                                                          |      |      |      |
|--------------|-----------|---------|--------|--------------------------------------------------------------------------|------|------|------|
| A_51_P518592 | NM_139227 | Atxn7   | 246103 | ataxin 7                                                                 | 1.60 | 1.89 | 0.27 |
| A_52_P123772 | AK037161  | NA      | NA     | NA                                                                       | 1.77 | 1.89 | 0.12 |
| A_51_P245485 | NM_181848 | Optn    | 71648  | optineurin                                                               | 2.02 | 1.89 | 0.04 |
| A_52_P458682 | NM_008182 | Gsta2   | 14858  | glutathione S-transferase, alpha 2 (Yc2)                                 | 1.39 | 1.89 | 0.70 |
| A_52_P239556 | AK077294  | Acta2   | 11475  | actin, alpha 2, smooth muscle, aorta                                     | 1.39 | 1.89 | 0.70 |
| A_51_P435830 | NM_029212 | Ccdc33  | 382077 | coiled-coil domain containing 33                                         | 1.58 | 1.88 | 0.28 |
| A_51_P381230 | NM_199449 | Zhx2    | 387609 | zinc fingers and homeoboxes 2                                            | 2.02 | 1.88 | 0.04 |
| A_51_P252363 | NM_133887 | Stx12   | 100226 | syntaxin 12                                                              | 2.22 | 1.88 | 0.01 |
| A_51_P417458 | NM_023434 | Tox4    | 268741 | TOX high mobility group box family member 4                              | 2.10 | 1.88 | 0.02 |
| A_51_P127841 | NM_019501 | Pdss1   | 56075  | prenyl (solanesyl) diphosphate synthase, subunit 1                       | 1.94 | 1.88 | 0.05 |
| A_52_P27225  | NM_201389 | Plec    | 18810  | plectin                                                                  | 1.48 | 1.88 | 0.46 |
| A_52_P219314 | NM_009499 | Vasp    | 22323  | vasodilator-stimulated phosphoprotein                                    | 1.70 | 1.88 | 0.16 |
| A_52_P337740 | AK030611  | NA      | NA     | NA                                                                       | 2.13 | 1.88 | 0.02 |
| A_51_P302977 | AB026045  | Ms4a4c  | 64380  | membrane-spanning 4-domains, subfamily A, member 4C                      | 1.39 | 1.88 | 0.70 |
| A_51_P137688 | AK087687  | Pex1    | 71382  | peroxisomal biogenesis factor 1                                          | 1.37 | 1.88 | 0.77 |
| A_51_P504378 | NM_172743 | Plekha7 | 233765 | pleckstrin homology domain containing, family A member 7                 | 1.74 | 1.88 | 0.15 |
| A_51_P316981 | NM_018886 | Lgals8  | 56048  | lectin, galactose binding, soluble 8                                     | 1.63 | 1.88 | 0.22 |
| A_51_P263227 | NM_177342 | Taf5    | 226182 | TAF5 RNA polymerase II, TATA box binding protein (TBP)-associated factor | 1.40 | 1.88 | 0.67 |
| A_51_P445117 | NM_011772 | Ikzf4   | 22781  | IKAROS family zinc finger 4                                              | 1.40 | 1.88 | 0.67 |
| A_52_P644354 | NM_011743 | Zfp106  | 20402  | zinc finger protein 106                                                  | 1.53 | 1.88 | 0.34 |
| A_51_P272553 | NM_011498 | Bhlhe40 | 20893  | basic helix-loop-helix family, member e40                                | 1.61 | 1.88 | 0.24 |
| A_51_P117952 | NM_010479 | Hspa1a  | 193740 | heat shock protein 1A                                                    | 1.54 | 1.88 | 0.34 |
| A_51_P196997 | NM_146064 | Soat2   | 223920 | sterol O-acyltransferase 2                                               | 2.11 | 1.88 | 0.02 |
| A_51_P284476 | NM_023122 | Gpm6b   | 14758  | glycoprotein m6b                                                         | 1.67 | 1.88 | 0.18 |
| A_51_P176068 | NM_172877 | Pramef8 | 242736 | PRAME family member 8                                                    | 1.68 | 1.88 | 0.18 |
| A_51_P364600 | NM_011815 | Fyb     | 23880  | FYN binding protein                                                      | 2.05 | 1.88 | 0.03 |
| A_51_P375631 | AK016792  | Gm13999 | 1E+08  | predicted gene 13999                                                     | 1.54 | 1.88 | 0.34 |
| A_51_P197213 | NM_025802 | Pnpla2  | 66853  | patatin-like phospholipase domain containing 2                           | 2.02 | 1.87 | 0.04 |
| A_52_P92372  | AK199310  | Ccdc90a | 76137  | coiled-coil domain containing 90A                                        | 1.42 | 1.87 | 0.58 |
| A_51_P318488 | NM_011785 | Akt3    | 23797  | thymoma viral proto-oncogene 3                                           | 1.57 | 1.87 | 0.30 |

|              |           |           |        |                                                                           |      |      |      |
|--------------|-----------|-----------|--------|---------------------------------------------------------------------------|------|------|------|
| A_52_P467718 | NM_029505 | Ap3m2     | 64933  | adaptor-related protein complex 3, mu 2 subunit                           | 1.85 | 1.87 | 0.09 |
| A_52_P605296 | XM_977731 | NA        | NA     | NA                                                                        | 1.71 | 1.87 | 0.16 |
| A_52_P43549  | NM_007646 | Cd38      | 12494  | CD38 antigen                                                              | 1.50 | 1.87 | 0.44 |
| A_52_P451300 | NM_033565 | Aff4      | 93736  | AF4/FMR2 family, member 4                                                 | 1.62 | 1.87 | 0.22 |
| A_52_P551743 | NM_033565 | Aff4      | 93736  | AF4/FMR2 family, member 4                                                 | 1.61 | 1.87 | 0.24 |
| A_52_P281209 | AK145066  | Kdm4a     | 230674 | lysine (K)-specific demethylase 4A                                        | 1.72 | 1.87 | 0.15 |
| A_51_P259186 | NM_145692 | Lrrc67    | 69312  | leucine rich repeat containing 67                                         | 1.43 | 1.87 | 0.58 |
| A_52_P605704 | NM_198021 | Scyl2     | 213326 | SCY1-like 2 ( <i>S. cerevisiae</i> )                                      | 1.92 | 1.87 | 0.06 |
| A_51_P143103 | BC066048  | Pprc1     | 226169 | peroxisome proliferative activated receptor, gamma, coactivator-related 1 | 1.68 | 1.87 | 0.18 |
| A_52_P79889  | NM_011065 | Per1      | 18626  | period homolog 1 ( <i>Drosophila</i> )                                    | 1.42 | 1.87 | 0.61 |
| A_51_P122246 | NM_029720 | Creld2    | 76737  | cysteine-rich with EGF-like domains 2                                     | 1.42 | 1.87 | 0.58 |
| A_52_P189946 | NM_019919 | Ltbp1     | 268977 | latent transforming growth factor beta binding protein 1                  | 2.03 | 1.87 | 0.04 |
| A_52_P421249 | NM_019986 | Habp4     | 56541  | hyaluronic acid binding protein 4                                         | 1.35 | 1.87 | 0.82 |
| A_51_P346453 | NM_153570 | Noc4l     | 100608 | nucleolar complex associated 4 homolog ( <i>S. cerevisiae</i> )           | 2.21 | 1.86 | 0.01 |
| A_51_P424232 | NM_010788 | Mecp2     | 17257  | methyl CpG binding protein 2                                              | 2.00 | 1.86 | 0.04 |
| A_51_P440315 | NM_145572 | Gys2      | 232493 | glycogen synthase 2                                                       | 1.68 | 1.86 | 0.18 |
| A_52_P102773 | BC072628  | Hk1       | 15275  | hexokinase 1                                                              | 1.49 | 1.86 | 0.44 |
| A_51_P507380 | U80780    | Hdac1     | 433759 | histone deacetylase 1                                                     | 1.33 | 1.86 | 0.86 |
| A_51_P189451 | NA        | NA        | NA     | NA                                                                        | 1.79 | 1.86 | 0.11 |
| A_51_P355802 | NM_175445 | Rassf2    | 215653 | Ras association (RalGDS/AF-6) domain family member 2                      | 1.57 | 1.86 | 0.30 |
| A_52_P235057 | AY550908  | Ubr5      | 70790  | ubiquitin protein ligase E3 component n-recognin 5                        | 1.47 | 1.86 | 0.50 |
| A_52_P614198 | AK039793  | Trav14n-1 | 1E+08  | T cell receptor alpha variable 14N-1                                      | 1.57 | 1.86 | 0.30 |
| A_51_P325165 | NM_145636 | Il27      | 246779 | interleukin 27                                                            | 1.48 | 1.86 | 0.46 |
| A_51_P267211 | AK037075  | NA        | NA     | NA                                                                        | 1.49 | 1.86 | 0.44 |
| A_52_P215136 | NM_028099 | Dusp11    | 72102  | dual specificity phosphatase 11 (RNA/RNP complex 1-interacting)           | 1.95 | 1.86 | 0.05 |
| A_51_P272817 | NM_008928 | Map2k3    | 26397  | mitogen-activated protein kinase kinase 3                                 | 1.70 | 1.86 | 0.16 |
| A_52_P327467 | NM_025426 | Med7      | 66213  | mediator complex subunit 7                                                | 1.98 | 1.86 | 0.04 |
| A_52_P578133 | BC033421  | Reep3     | 28193  | receptor accessory protein 3                                              | 1.47 | 1.86 | 0.50 |

|               |           |          |        |                                                                                                               |      |      |      |
|---------------|-----------|----------|--------|---------------------------------------------------------------------------------------------------------------|------|------|------|
| A_51_P100991  | NM_145067 | Gucy2c   | 14917  | guanylate cyclase 2c                                                                                          | 1.71 | 1.86 | 0.16 |
| A_51_P255456  | NM_009994 | Cyp1b1   | 13078  | cytochrome P450, family 1, subfamily b, polypeptide 1                                                         | 1.97 | 1.86 | 0.04 |
| A_51_P513311  | NM_009107 | Rxrg     | 20183  | retinoid X receptor gamma                                                                                     | 1.59 | 1.86 | 0.28 |
| A_52_P483336  | NM_007641 | Ms4a1    | 12482  | membrane-spanning 4-domains, subfamily A, member 1                                                            | 1.38 | 1.85 | 0.70 |
| A_52_P681495  | NM_027930 | Fam54a   | 71804  | family with sequence similarity 54, member A                                                                  | 2.05 | 1.85 | 0.03 |
| A_51_P233534  | NM_011782 | Adamts5  | 23794  | a disintegrin-like and metallopeptidase (reprolysin type) with thrombospondin type 1 motif, 5 (aggrecanase-2) | 1.45 | 1.85 | 0.53 |
| A_51_P320377  | NM_001039 | Gtf2a2   | 235459 | general transcription factor II A, 2                                                                          | 2.25 | 1.85 | 0.01 |
| A_51_P506674  | NM_001013 | Rpp38    | 227522 | ribonuclease P/MRP 38 subunit (human)                                                                         | 1.78 | 1.85 | 0.12 |
| A_51_P320860  | NM_025948 | Lsm14a   | 67070  | LSM14 homolog A (SCD6, <i>S. cerevisiae</i> )                                                                 | 1.92 | 1.85 | 0.06 |
| A_52_P284958  | NM_173784 | Ubtd2    | 327900 | ubiquitin domain containing 2                                                                                 | 1.71 | 1.85 | 0.16 |
| A_52_P17146   | NM_009758 | Bmpr1a   | 12166  | bone morphogenetic protein receptor, type 1A                                                                  | 2.29 | 1.85 | 0.01 |
| A_51_P440144  | BI100969  | Slc4a4   | 54403  | solute carrier family 4 (anion exchanger), member 4                                                           | 1.44 | 1.85 | 0.55 |
| A_52_P68419   | NM_175164 | Arhgap26 | 71302  | Rho GTPase activating protein 26                                                                              | 1.60 | 1.85 | 0.27 |
| A_51_P398878  | NM_030724 | Uck2     | 80914  | uridine-cytidine kinase 2                                                                                     | 1.81 | 1.85 | 0.11 |
| A_52_P1068216 | AK051522  | NA       | NA     | NA                                                                                                            | 1.60 | 1.85 | 0.27 |
| A_51_P511482  | NM_028680 | lft57    | 73916  | intraflagellar transport 57 homolog ( <i>Chlamydomonas</i> )                                                  | 1.50 | 1.85 | 0.44 |
| A_51_P118945  | AF054581  | Il2ra    | 16184  | interleukin 2 receptor, alpha chain                                                                           | 2.18 | 1.85 | 0.02 |
| A_52_P684830  | NM_009318 | Tapbp    | 21356  | TAP binding protein                                                                                           | 1.68 | 1.85 | 0.18 |
| A_51_P361675  | AK047998  | Dopey1   | 320615 | dopey family member 1                                                                                         | 1.64 | 1.85 | 0.21 |
| A_51_P152826  | NM_025872 | Golt1b   | 66964  | golgi transport 1 homolog B ( <i>S. cerevisiae</i> )                                                          | 1.64 | 1.85 | 0.21 |
| A_52_P469842  | NM_010786 | Mdm2     | 17246  | transformed mouse 3T3 cell double minute 2                                                                    | 1.82 | 1.85 | 0.10 |
| A_52_P577662  | NM_007904 | Ednrb    | 13618  | endothelin receptor type B                                                                                    | 1.43 | 1.85 | 0.58 |
| A_52_P276748  | NM_026102 | Daam1    | 208846 | dishevelled associated activator of morphogenesis 1                                                           | 1.65 | 1.85 | 0.20 |
| A_52_P480088  | NM_025685 | Col27a1  | 373864 | collagen, type XXVII, alpha 1                                                                                 | 1.63 | 1.85 | 0.21 |
| A_51_P169495  | NM_008619 | Mov10    | 17454  | Moloney leukemia virus 10                                                                                     | 1.53 | 1.85 | 0.37 |
| A_52_P501697  | NM_011890 | Sgcb     | 24051  | sarcoglycan, beta (dystrophin-associated glycoprotein)                                                        | 1.59 | 1.85 | 0.27 |



|               |           |          |        |                                                              |      |      |      |
|---------------|-----------|----------|--------|--------------------------------------------------------------|------|------|------|
| A_52_P548913  | NM_009817 | Cast     | 12380  | calpastatin                                                  | 1.86 | 1.85 | 0.07 |
| A_52_P676461  | AK037065  | Lpgat1   | 226856 | lysophosphatidylglycerol acyltransferase 1                   | 1.42 | 1.85 | 0.58 |
| A_52_P70796   | NM_007551 | Cxcr5    | 12145  | chemochine (C-X-C motif) receptor 5                          | 1.37 | 1.85 | 0.77 |
| A_52_P26409   | M32070    | Rarg     | 19411  | retinoic acid receptor, gamma                                | 1.72 | 1.85 | 0.15 |
| A_51_P413088  | NA        | NA       | NA     | NA                                                           | 1.64 | 1.85 | 0.21 |
| A_52_P84901   | NM_133891 | Slc44a1  | 100434 | solute carrier family 44, member 1                           | 1.97 | 1.85 | 0.04 |
| A_51_P358037  | BC026627  | Abi3bp   | 320712 | ABI gene family, member 3 (NESH) binding protein             | 1.47 | 1.85 | 0.50 |
| A_51_P388847  | NM_145934 | Stap2    | 106766 | signal transducing adaptor family member 2                   | 2.13 | 1.85 | 0.02 |
| A_51_P106191  | NM_019930 | Ranbp9   | 56705  | RAN binding protein 9                                        | 1.62 | 1.85 | 0.24 |
| A_51_P284793  | NM_027927 | Ints12   | 71793  | integrator complex subunit 12                                | 2.15 | 1.84 | 0.02 |
| A_51_P310100  | AK029149  | Rnaset2b | 68195  | ribonuclease T2B                                             | 1.46 | 1.84 | 0.53 |
| A_52_P351574  | NM_019677 | Plcb1    | 18795  | phospholipase C, beta 1                                      | 1.47 | 1.84 | 0.50 |
| A_51_P195588  | XM_140497 | Adnp2    | 240442 | ADNP homeobox 2                                              | 1.63 | 1.84 | 0.22 |
| A_51_P381657  | NM_146144 | Usp1     | 230484 | ubiquitin specific peptidase 1                               | 1.98 | 1.84 | 0.04 |
| A_51_P292057  | NM_030732 | Tbl1xr1  | 81004  | transducin (beta)-like 1X-linked receptor 1                  | 1.85 | 1.84 | 0.09 |
| A_52_P94256   | NM_020494 | Ddx24    | 27225  | DEAD (Asp-Glu-Ala-Asp) box polypeptide 24                    | 1.59 | 1.84 | 0.27 |
| A_51_P420918  | NM_020498 | Ly6i     | 57248  | lymphocyte antigen 6 complex, locus I                        | 1.73 | 1.84 | 0.15 |
| A_52_P34823   | NM_010747 | Lyn      | 17096  | Yamaguchi sarcoma viral (v-yes-1) oncogene homolog           | 1.69 | 1.84 | 0.18 |
| A_52_P683306  | NM_146084 | Fam13b   | 225358 | family with sequence similarity 13, member B                 | 2.07 | 1.84 | 0.03 |
| A_52_P3845    | XM_193558 | Rnf217   | 268291 | ring finger protein 217                                      | 1.72 | 1.84 | 0.15 |
| A_51_P142529  | NM_011316 | Saa4     | 20211  | serum amyloid A 4                                            | 1.42 | 1.84 | 0.58 |
| A_51_P483544  | NM_013930 | Aass     | 30956  | aminoadipate-semialdehyde synthase                           | 1.35 | 1.84 | 0.82 |
| A_52_P660812  | BC082312  | Arid5b   | 71371  | AT rich interactive domain 5B (MRF1-like)                    | 1.77 | 1.84 | 0.12 |
| A_52_P371718  | NM_054089 | Tgs1     | 116940 | trimethylguanosine synthase homolog ( <i>S. cerevisiae</i> ) | 1.41 | 1.84 | 0.61 |
| A_51_P155763  | XM_125617 | Ascc3    | 77987  | activating signal cointegrator 1 complex subunit 3           | 1.62 | 1.84 | 0.22 |
| A_52_P129354  | NM_175325 | Bbs4     | 102774 | Bardet-Biedl syndrome 4 (human)                              | 2.27 | 1.84 | 0.01 |
| A_52_P564663  | NA        | NA       | NA     | NA                                                           | 1.37 | 1.84 | 0.77 |
| A_51_P492648  | AK140220  | NA       | NA     | NA                                                           | 1.70 | 1.84 | 0.17 |
| A_52_P1128182 | NA        | NA       | NA     | NA                                                           | 1.87 | 1.84 | 0.07 |
| A_52_P533724  | NM_026574 | Ino80    | 68142  | INO80 homolog ( <i>S. cerevisiae</i> )                       | 1.93 | 1.84 | 0.05 |
| A_52_P243522  | NM_173862 | Fam83a   | 239463 | family with sequence similarity 83, member A                 | 1.88 | 1.84 | 0.07 |

|              |            |           |        |                                                                                                   |      |      |      |
|--------------|------------|-----------|--------|---------------------------------------------------------------------------------------------------|------|------|------|
| A_52_P192426 | NM_011609  | Tnfrsf1a  | 21937  | tumor necrosis factor receptor superfamily, member 1a                                             | 2.21 | 1.84 | 0.01 |
| A_51_P128876 | NM_025378  | Ifitm3    | 66141  | interferon induced transmembrane protein 3                                                        | 1.90 | 1.83 | 0.06 |
| A_52_P10622  | NM_010330  | Emb       | 13723  | embigin                                                                                           | 1.34 | 1.83 | 0.86 |
| A_52_P530979 | BC085235   | Hbs1l     | 56422  | Hbs1-like (S. cerevisiae)                                                                         | 1.66 | 1.83 | 0.20 |
| A_52_P578266 | NM_011529  | Tank      | 21353  | TRAF family member-associated Nf-kappa B activator                                                | 1.66 | 1.83 | 0.20 |
| A_51_P420229 | NM_007719  | Ccr7      | 12775  | chemokine (C-C motif) receptor 7                                                                  | 1.66 | 1.83 | 0.20 |
| A_51_P330133 | NM_025682  | Pspc1     | 66645  | paraspeckle protein 1                                                                             | 1.83 | 1.83 | 0.09 |
| A_51_P110371 | NM_019573  | Wwox      | 80707  | WW domain-containing oxidoreductase                                                               | 1.84 | 1.83 | 0.09 |
| A_51_P103114 | NM_008981  | Ptprg     | 19270  | protein tyrosine phosphatase, receptor type, G                                                    | 1.70 | 1.83 | 0.16 |
| A_52_P571444 | NM_133784  | Wwtr1     | 97064  | WW domain containing transcription regulator 1                                                    | 1.83 | 1.83 | 0.09 |
| A_51_P136479 | NM_030096  | Ddx52     | 78394  | DEAD (Asp-Glu-Ala-Asp) box polypeptide 52                                                         | 1.65 | 1.83 | 0.20 |
| A_52_P206881 | NM_026045  | Prpf18    | 67229  | PRP18 pre-mRNA processing factor 18 homolog (yeast)                                               | 1.96 | 1.83 | 0.04 |
| A_52_P487246 | NM_011908  | Ubl3      | 24109  | ubiquitin-like 3                                                                                  | 2.04 | 1.83 | 0.03 |
| A_51_P459615 | NM_198416  | Zzz3      | 108946 | zinc finger, ZZ domain containing 3                                                               | 1.36 | 1.83 | 0.82 |
| A_51_P465740 | NM_175215  | Lysmd4    | 75099  | LysM, putative peptidoglycan-binding, domain containing 4                                         | 2.12 | 1.83 | 0.02 |
| A_51_P277795 | NM_026054  | 2810474O1 | 67246  | RIKEN cDNA 2810474O19 gene                                                                        | 1.37 | 1.83 | 0.77 |
| A_51_P402193 | NM_011945  | Map3k1    | 26401  | mitogen-activated protein kinase kinase kinase 1                                                  | 1.68 | 1.83 | 0.18 |
| A_51_P209807 | XM_0010017 | Ccnyl1    | 227210 | cyclin Y-like 1                                                                                   | 1.72 | 1.83 | 0.15 |
| A_52_P665887 | BC068026   | Aire      | 11634  | autoimmune regulator (autoimmune polyendocrinopathy candidiasis ectodermal dystrophy)             | 1.85 | 1.83 | 0.07 |
| A_52_P304881 | NM_053124  | Smarca5   | 93762  | SWI/SNF related, matrix associated, actin dependent regulator of chromatin, subfamily a, member 5 | 2.12 | 1.83 | 0.02 |
| A_51_P438479 | NM_177643  | Zfp281    | 226442 | zinc finger protein 281                                                                           | 1.38 | 1.83 | 0.70 |
| A_52_P455045 | NM_001013  | Rsl1      | 380855 | regulator of sex limited protein 1                                                                | 1.54 | 1.83 | 0.34 |
| A_52_P487024 | NM_001005  | Smg7      | 226517 | Smg-7 homolog, nonsense mediated mRNA decay factor (C. elegans)                                   | 2.06 | 1.82 | 0.03 |
| A_51_P415863 | NM_010559  | Il6ra     | 16194  | interleukin 6 receptor, alpha                                                                     | 1.96 | 1.82 | 0.05 |
| A_51_P352864 | NM_147110  | Olfir570  | 259114 | olfactory receptor 570                                                                            | 1.68 | 1.82 | 0.18 |

|              |           |           |        |                                                                               |      |      |      |
|--------------|-----------|-----------|--------|-------------------------------------------------------------------------------|------|------|------|
| A_52_P155554 | NM_026772 | Cdc42ep2  | 104252 | CDC42 effector protein (Rho GTPase binding) 2                                 | 1.59 | 1.82 | 0.27 |
| A_52_P444915 | NM_133242 | Rbm39     | 170791 | RNA binding motif protein 39                                                  | 1.52 | 1.82 | 0.40 |
| A_51_P275915 | AY550908  | Ubr5      | 70790  | ubiquitin protein ligase E3 component n-recognin 5                            | 1.70 | 1.82 | 0.17 |
| A_52_P599264 | NM_175088 | Mdfic     | 16543  | MyoD family inhibitor domain containing                                       | 1.91 | 1.82 | 0.06 |
| A_52_P302395 | NM_172827 | Lnpep     | 240028 | leucyl/cystinyl aminopeptidase                                                | 1.58 | 1.82 | 0.28 |
| A_51_P350332 | NM_019733 | Rbpms     | 19663  | RNA binding protein gene with multiple splicing                               | 1.60 | 1.82 | 0.27 |
| A_52_P69020  | NM_175034 | Slc24a5   | 317750 | solute carrier family 24, member 5                                            | 1.91 | 1.82 | 0.06 |
| A_52_P348638 | NM_017398 | Diap2     | 54004  | diaphanous homolog 2 (Drosophila)<br>fascin homolog 1, actin bundling protein | 1.74 | 1.82 | 0.15 |
| A_51_P366061 | NM_007984 | Fscn1     | 14086  | (Strongylocentrotus purpuratus)                                               | 2.12 | 1.82 | 0.02 |
| A_51_P305250 | NM_027008 | Kctd5     | 69259  | potassium channel tetramerisation domain containing 5                         | 1.81 | 1.82 | 0.11 |
| A_52_P50216  | NM_146043 | Spin1     | 20729  | spindlin 1                                                                    | 1.99 | 1.82 | 0.04 |
| A_51_P397394 | NM_177025 | Cobl1     | 319876 | Cobl-like 1                                                                   | 1.40 | 1.82 | 0.67 |
| A_51_P393726 | NM_173865 | Slc41a1   | 98396  | solute carrier family 41, member 1                                            | 1.43 | 1.82 | 0.58 |
| A_52_P198993 | NM_133847 | Tm9sf4    | 99237  | transmembrane 9 superfamily protein member 4                                  | 1.87 | 1.82 | 0.07 |
| A_51_P345470 | NM_145501 | Pi4k2a    | 84095  | phosphatidylinositol 4-kinase type 2 alpha                                    | 2.10 | 1.82 | 0.02 |
| A_52_P447375 | U31966    | Cbr1      | 12408  | carbonyl reductase 1                                                          | 1.58 | 1.82 | 0.28 |
| A_51_P520066 | NM_020273 | Gmeb1     | 56809  | glucocorticoid modulatory element binding protein 1                           | 2.08 | 1.82 | 0.03 |
| A_51_P454726 | NM_001039 | Gtf2a2    | 235459 | general transcription factor II A, 2                                          | 1.75 | 1.81 | 0.14 |
| A_52_P288614 | NM_025936 | Rars      | 104458 | arginyl-tRNA synthetase                                                       | 1.79 | 1.81 | 0.11 |
| A_51_P339744 | BC106181  | 3010003L2 | 109163 | RIKEN cDNA 3010003L21 gene                                                    | 1.84 | 1.81 | 0.09 |
| A_51_P493602 | XM_129248 | NA        | NA     | NA                                                                            | 1.45 | 1.81 | 0.53 |
| A_52_P271555 | NM_212446 | Psmf1     | 228769 | proteasome (prosome, macropain) inhibitor subunit 1                           | 2.21 | 1.81 | 0.01 |
| A_52_P562267 | NM_001033 | 9130409I2 | 619326 | RIKEN cDNA 9130409I23 gene                                                    | 1.38 | 1.81 | 0.70 |
| A_52_P603900 | NM_024436 | Rab22a    | 19334  | RAB22A, member RAS oncogene family                                            | 1.78 | 1.81 | 0.12 |
| A_52_P362611 | AK030594  | Ube2f     | 67921  | ubiquitin-conjugating enzyme E2F (putative)                                   | 1.36 | 1.81 | 0.82 |
| A_51_P149391 | AK037815  | Akap13    | 75547  | A kinase (PRKA) anchor protein 13                                             | 1.78 | 1.81 | 0.11 |
| A_51_P455681 | NM_007648 | Cd3e      | 12501  | CD3 antigen, epsilon polypeptide                                              | 1.40 | 1.81 | 0.67 |
| A_52_P696044 | AK145414  | Shb       | 230126 | src homology 2 domain-containing transforming protein<br>B                    | 1.83 | 1.81 | 0.09 |

|              |           |           |        |                                                             |      |      |      |
|--------------|-----------|-----------|--------|-------------------------------------------------------------|------|------|------|
| A_52_P252996 | NM_028527 | 170004711 | 73385  | RIKEN cDNA 1700047117 gene 1                                | 1.64 | 1.81 | 0.21 |
| A_52_P26794  | NM_027395 | Basp1     | 70350  | brain abundant, membrane attached signal protein 1          | 1.55 | 1.81 | 0.34 |
| A_51_P466229 | NM_026840 | Pdgfrl    | 68797  | platelet-derived growth factor receptor-like                | 2.01 | 1.81 | 0.04 |
| A_51_P254583 | NM_172291 | Foxred1   | 235169 | FAD-dependent oxidoreductase domain containing 1            | 1.93 | 1.81 | 0.05 |
| A_52_P519882 | NM_144866 | Etf1      | 225363 | eukaryotic translation termination factor 1                 | 1.44 | 1.81 | 0.55 |
| A_51_P199624 | NM_172276 | Sfrs8     | 231769 | splicing factor, arginine/serine-rich 8                     | 1.92 | 1.80 | 0.06 |
| A_51_P151126 | NM_013706 | Cd52      | 23833  | CD52 antigen                                                | 1.76 | 1.80 | 0.13 |
| A_51_P142153 | NA        | NA        | NA     | NA                                                          | 1.44 | 1.80 | 0.55 |
| A_51_P495259 | AK083275  | Traf6     | 22034  | TNF receptor-associated factor 6                            | 2.07 | 1.80 | 0.03 |
| A_52_P138110 | AK161835  | 1110032AC | 68721  | RIKEN cDNA 1110032A03 gene                                  | 1.65 | 1.80 | 0.20 |
| A_52_P9425   | NA        | NA        | NA     | NA                                                          | 1.95 | 1.80 | 0.05 |
| A_51_P297579 | NM_008102 | Gch1      | 14528  | GTP cyclohydrolase 1                                        | 1.59 | 1.80 | 0.28 |
| A_51_P494541 | NM_146096 | Fam108b   | 226016 | family with sequence similarity 108, member B               | 1.72 | 1.80 | 0.15 |
| A_51_P436483 | NM_025280 | Kin       | 16588  | antigenic determinant of rec-A protein                      | 2.14 | 1.80 | 0.02 |
| A_52_P644045 | BU938682  | NA        | NA     | NA                                                          | 1.47 | 1.80 | 0.50 |
| A_51_P232889 | NM_023324 | Peli1     | 67245  | pellino 1                                                   | 1.67 | 1.80 | 0.20 |
| A_51_P196687 | NM_008338 | Ifngr2    | 15980  | interferon gamma receptor 2                                 | 1.40 | 1.80 | 0.67 |
| A_52_P309022 | NM_007826 | Dach1     | 13134  | dachshund 1 (Drosophila)                                    | 1.73 | 1.80 | 0.15 |
| A_51_P195947 | NM_178654 | Pkn2      | 109333 | protein kinase N2                                           | 2.25 | 1.80 | 0.01 |
| A_51_P467076 | NM_010000 | Cyp2b9    | 13094  | cytochrome P450, family 2, subfamily b, polypeptide 9       | 1.47 | 1.80 | 0.50 |
| A_51_P193000 | NM_175325 | Bbs4      | 102774 | Bardet-Biedl syndrome 4 (human)                             | 1.89 | 1.80 | 0.07 |
| A_52_P53906  | NM_009829 | Ccnd2     | 12444  | cyclin D2                                                   | 1.64 | 1.80 | 0.21 |
| A_52_P12877  | NM_031165 | Hspa8     | 15481  | heat shock protein 8                                        | 1.68 | 1.80 | 0.18 |
| A_51_P510900 | NM_026460 | Serpini2  | 67931  | serine (or cysteine) peptidase inhibitor, clade I, member 2 | 1.72 | 1.80 | 0.15 |
| A_51_P182116 | NM_019466 | Rcan1     | 54720  | regulator of calcineurin 1                                  | 1.74 | 1.79 | 0.15 |
| A_52_P279068 | NM_026367 | Gpatch2   | 67769  | G patch domain containing 2                                 | 1.80 | 1.79 | 0.11 |
| A_52_P60519  | NM_029648 | D19Ertd73 | 76539  | DNA segment, Chr 19, ERATO Doi 737, expressed               | 1.70 | 1.79 | 0.16 |
| A_52_P324866 | AK028546  | Arnt      | 11863  | aryl hydrocarbon receptor nuclear translocator              | 2.24 | 1.79 | 0.01 |
| A_51_P153995 | NM_018762 | Gp9       | 54368  | glycoprotein 9 (platelet)                                   | 1.53 | 1.79 | 0.34 |
| A_51_P383524 | NM_181728 | Art3      | 109979 | ADP-ribosyltransferase 3                                    | 1.68 | 1.79 | 0.18 |

|              |            |            |        |                                                                                                   |      |      |      |
|--------------|------------|------------|--------|---------------------------------------------------------------------------------------------------|------|------|------|
| A_52_P636050 | NM_025663  | Gpatch4    | 66614  | G patch domain containing 4                                                                       | 1.41 | 1.79 | 0.61 |
| A_52_P547965 | NM_007690  | Chd1       | 12648  | chromodomain helicase DNA binding protein 1                                                       | 1.62 | 1.79 | 0.24 |
| A_52_P438656 | NA         | NA         | NA     | NA                                                                                                | 1.33 | 1.79 | 0.86 |
| A_51_P509579 | NM_028118  | Wdsub1     | 72137  | WD repeat, SAM and U-box domain containing 1                                                      | 2.27 | 1.79 | 0.01 |
| A_52_P529751 | CF747846   | NA         | NA     | NA                                                                                                | 1.83 | 1.79 | 0.09 |
| A_52_P230938 | NM_010741  | Ly6c1      | 17067  | lymphocyte antigen 6 complex, locus C1                                                            | 1.56 | 1.79 | 0.33 |
| A_52_P615010 | NM_027420  | 2610034B1  | 70420  | RIKEN cDNA 2610034B18 gene                                                                        | 1.71 | 1.79 | 0.16 |
| A_51_P484289 | NM_178798  | Slc7a6     | 330836 | solute carrier family 7 (cationic amino acid transporter, $\gamma^+$ system), member 6            | 1.95 | 1.79 | 0.05 |
| A_52_P160456 | NM_024275  | Map4k5     | 399510 | mitogen-activated protein kinase kinase kinase kinase 5                                           | 1.74 | 1.79 | 0.15 |
| A_52_P187565 | NA         | NA         | NA     | NA                                                                                                | 1.44 | 1.79 | 0.55 |
| A_51_P504337 | NM_009848  | Entpd1     | 12495  | ectonucleoside triphosphate diphosphohydrolase 1                                                  | 1.62 | 1.79 | 0.22 |
| A_52_P142346 | NA         | NA         | NA     | NA                                                                                                | 1.61 | 1.79 | 0.24 |
| A_52_P350519 | NM_008199  | H2-BI      | 14963  | histocompatibility 2, blastocyst                                                                  | 1.51 | 1.79 | 0.40 |
| A_51_P364321 | XM_0010011 | NA         | NA     | NA                                                                                                | 1.59 | 1.79 | 0.28 |
| A_52_P584704 | NA         | NA         | NA     | NA                                                                                                | 1.29 | 1.79 | 1.04 |
| A_51_P221661 | NM_053124  | Smarca5    | 93762  | SWI/SNF related, matrix associated, actin dependent regulator of chromatin, subfamily a, member 5 | 1.62 | 1.79 | 0.22 |
| A_51_P445392 | NM_175127  | Fbxo28     | 67948  | F-box protein 28                                                                                  | 1.64 | 1.79 | 0.21 |
| A_52_P514336 | NM_177240  | D030016E13 | 20714  | RIKEN cDNA D030016E14 gene                                                                        | 1.41 | 1.79 | 0.61 |
| A_51_P487518 | NM_009808  | Casp12     | 12364  | caspase 12                                                                                        | 1.71 | 1.79 | 0.16 |
| A_51_P104187 | NM_009460  | Sumo1      | 22218  | SMT3 suppressor of mif two 3 homolog 1 (yeast)                                                    | 1.61 | 1.79 | 0.24 |
| A_52_P415750 | NM_021439  | Chst11     | 58250  | carbohydrate sulfotransferase 11                                                                  | 1.50 | 1.78 | 0.44 |
| A_51_P517870 | NM_198429  | Nfatc1     | 18018  | nuclear factor of activated T-cells, cytoplasmic, calcineurin-dependent 1                         | 1.56 | 1.78 | 0.30 |
| A_51_P183102 | NM_175226  | Rnf139     | 75841  | ring finger protein 139                                                                           | 1.65 | 1.78 | 0.20 |
| A_51_P324037 | BG294955   | NA         | NA     | NA                                                                                                | 1.87 | 1.78 | 0.07 |
| A_51_P340829 | NM_177604  | AA986860   | 212439 | expressed sequence AA986860                                                                       | 1.49 | 1.78 | 0.46 |
| A_51_P284665 | NM_019677  | Plcb1      | 18795  | phospholipase C, beta 1                                                                           | 1.34 | 1.78 | 0.86 |
| A_51_P341717 | AF251703   | Cd300lf    | 246746 | CD300 antigen like family member F                                                                | 1.89 | 1.78 | 0.07 |
| A_51_P426096 | NM_010810  | Mmp7       | 17393  | matrix metalloproteinase 7                                                                        | 1.37 | 1.78 | 0.77 |

|               |           |          |        |                                                                                             |      |      |      |
|---------------|-----------|----------|--------|---------------------------------------------------------------------------------------------|------|------|------|
| A_52_P619887  | BC065092  | Heatr6   | 217026 | HEAT repeat containing 6                                                                    | 1.67 | 1.78 | 0.20 |
| A_51_P141152  | NM_019812 | Sirt1    | 93759  | sirtuin 1 (silent mating type information regulation 2, homolog) 1 ( <i>S. cerevisiae</i> ) | 1.59 | 1.78 | 0.27 |
| A_51_P329855  | NM_183149 | Zfp598   | 213753 | zinc finger protein 598                                                                     | 1.78 | 1.78 | 0.12 |
| A_52_P157316  | NM_030684 | Trim34   | 94094  | tripartite motif-containing 34                                                              | 1.86 | 1.78 | 0.07 |
| A_52_P15658   | NA        | NA       | NA     | NA                                                                                          | 1.82 | 1.78 | 0.10 |
| A_51_P377547  | NM_011529 | Tank     | 21353  | TRAF family member-associated Nf-kappa B activator                                          | 1.81 | 1.78 | 0.10 |
| A_52_P680710  | NM_008466 | Kpna3    | 16648  | karyopherin (importin) alpha 3                                                              | 1.82 | 1.78 | 0.10 |
| A_51_P433237  | NM_007665 | Cdh3     | 12560  | cadherin 3                                                                                  | 1.93 | 1.78 | 0.05 |
| A_51_P403610  | NM_146852 | Olfr1339 | 258851 | olfactory receptor 1339                                                                     | 1.69 | 1.78 | 0.17 |
| A_52_P51548   | AK037015  | Pard3    | 93742  | par-3 (partitioning defective 3) homolog ( <i>C. elegans</i> )                              | 1.29 | 1.78 | 1.04 |
| A_52_P653902  | NM_175009 | Eny2     | 223527 | enhancer of yellow 2 homolog ( <i>Drosophila</i> )                                          | 1.70 | 1.78 | 0.17 |
| A_52_P78659   | NM_024288 | Rmnd5a   | 68477  | required for meiotic nuclear division 5 homolog A ( <i>S. cerevisiae</i> )                  | 1.64 | 1.78 | 0.21 |
| A_51_P361535  | NM_011190 | Psme2    | 19188  | proteasome (prosome, macropain) 28 subunit, beta                                            | 2.16 | 1.78 | 0.02 |
| A_51_P320614  | NM_001042 | Txnrd1   | 50493  | thioredoxin reductase 1                                                                     | 1.78 | 1.78 | 0.12 |
| A_52_P277139  | NM_030886 | Ankrd17  | 81702  | ankyrin repeat domain 17                                                                    | 1.95 | 1.78 | 0.05 |
| A_51_P500718  | NM_007832 | Dck      | 13178  | deoxycytidine kinase                                                                        | 1.67 | 1.77 | 0.20 |
| A_52_P422514  | NA        | NA       | NA     | NA                                                                                          | 1.43 | 1.77 | 0.58 |
| A_52_P165705  | NM_007640 | Cd1d2    | 12480  | CD1d2 antigen                                                                               | 1.36 | 1.77 | 0.77 |
| A_51_P505872  | XM_194424 | NA       | NA     | NA                                                                                          | 2.07 | 1.77 | 0.03 |
| A_52_P421657  | NM_139061 | Vps54    | 245944 | vacuolar protein sorting 54 (yeast)                                                         | 2.10 | 1.77 | 0.02 |
| A_52_P430262  | NA        | NA       | NA     | NA                                                                                          | 1.72 | 1.77 | 0.15 |
| A_51_P191021  | NM_010472 | Agfg1    | 15463  | ArfGAP with FG repeats 1                                                                    | 1.95 | 1.77 | 0.05 |
| A_52_P1004080 | AK051046  | NA       | NA     | NA                                                                                          | 1.52 | 1.77 | 0.37 |
| A_52_P389957  | AK076431  | Lrch1    | 380916 | leucine-rich repeats and calponin homology (CH) domain containing 1                         | 2.10 | 1.77 | 0.02 |
| A_51_P365516  | CF584628  | NA       | NA     | NA                                                                                          | 1.41 | 1.77 | 0.61 |
| A_51_P267754  | NM_010494 | Icam2    | 15896  | intercellular adhesion molecule 2                                                           | 1.56 | 1.77 | 0.33 |
| A_51_P105124  | NM_183168 | P2ry6    | 233571 | pyrimidinergic receptor P2Y, G-protein coupled, 6                                           | 1.69 | 1.77 | 0.18 |

|              |           |           |        |                                                                                   |      |      |      |
|--------------|-----------|-----------|--------|-----------------------------------------------------------------------------------|------|------|------|
| A_52_P176013 | NM_008394 | Irf9      | 16391  | interferon regulatory factor 9                                                    | 1.57 | 1.77 | 0.30 |
| A_51_P249335 | NM_145565 | Sds       | 231691 | serine dehydratase                                                                | 1.58 | 1.77 | 0.28 |
| A_51_P374900 | NM_028808 | P2ry13    | 74191  | purinergic receptor P2Y, G-protein coupled 13                                     | 1.61 | 1.77 | 0.24 |
| A_52_P597002 | NA        | NA        | NA     | NA                                                                                | 2.27 | 1.77 | 0.01 |
| A_52_P50090  | NM_001079 | Sfrs5     | 20384  | splicing factor, arginine/serine-rich 5 (SRp40, HRS)                              | 1.58 | 1.77 | 0.28 |
| A_51_P125535 | NM_017374 | Ppp2cb    | 19053  | protein phosphatase 2 (formerly 2A), catalytic subunit, beta isoform              | 1.79 | 1.77 | 0.11 |
| A_52_P273177 | NM_008448 | Kif5b     | 16573  | kinesin family member 5B                                                          | 1.84 | 1.77 | 0.09 |
| A_52_P618569 | NM_001025 | Ikzf1     | 22778  | IKAROS family zinc finger 1                                                       | 1.96 | 1.77 | 0.04 |
| A_52_P144032 | NM_001042 | Rbpms     | 19663  | RNA binding protein gene with multiple splicing                                   | 1.37 | 1.77 | 0.77 |
| A_51_P167322 | NM_030886 | Ankrd17   | 81702  | ankyrin repeat domain 17                                                          | 1.71 | 1.77 | 0.16 |
| A_52_P71496  | NM_025816 | Tax1bp1   | 52440  | Tax1 (human T-cell leukemia virus type I) binding protein 1                       | 1.68 | 1.77 | 0.18 |
| A_52_P811745 | BB200491  | NA        | NA     | NA                                                                                | 1.44 | 1.77 | 0.55 |
| A_52_P149590 | NM_144848 | Eppk1     | 223650 | epiplakin 1                                                                       | 1.73 | 1.77 | 0.15 |
| A_52_P309376 | NM_008413 | Jak2      | 16452  | Janus kinase 2                                                                    | 1.39 | 1.77 | 0.70 |
| A_51_P125691 | NM_028023 | Cdca4     | 71963  | cell division cycle associated 4                                                  | 1.45 | 1.77 | 0.53 |
| A_52_P85945  | NM_008602 | Pias2     | 17344  | protein inhibitor of activated STAT 2                                             | 1.56 | 1.76 | 0.33 |
| A_51_P513515 | AK018656  | Fer1l4    | 74562  | fer-1-like 4 (C. elegans)                                                         | 1.50 | 1.76 | 0.44 |
| A_52_P658465 | XM_001004 | NA        | NA     | NA                                                                                | 1.92 | 1.76 | 0.06 |
| A_51_P178319 | NM_029466 | Arl5b     | 75869  | ADP-ribosylation factor-like 5B                                                   | 1.61 | 1.76 | 0.24 |
| A_51_P181297 | NM_025429 | Serpinb1a | 66222  | serine (or cysteine) peptidase inhibitor, clade B, member 1a                      | 1.38 | 1.76 | 0.70 |
| A_52_P353242 | NA        | NA        | NA     | NA                                                                                | 1.45 | 1.76 | 0.53 |
| A_51_P205820 | NM_178357 | Klf11     | 194655 | Kruppel-like factor 11                                                            | 1.69 | 1.76 | 0.17 |
| A_52_P29987  | AK147576  | Prickle2  | 243548 | prickle homolog 2 (Drosophila)                                                    | 1.74 | 1.76 | 0.15 |
| A_52_P625880 | AK029366  | Tmem209   | 72649  | transmembrane protein 209                                                         | 1.69 | 1.76 | 0.18 |
| A_52_P615096 | NM_015729 | Acox1     | 11430  | acyl-Coenzyme A oxidase 1, palmitoyl membrane protein, palmitoylated 7 (MAGUK p55 | 1.37 | 1.76 | 0.77 |
| A_52_P57889  | AK141108  | Mpp7      | 75739  | subfamily member 7)                                                               | 1.56 | 1.76 | 0.33 |
| A_51_P271835 | NM_146142 | Tdrd7     | 100121 | tudor domain containing 7                                                         | 1.93 | 1.76 | 0.05 |
| A_52_P317730 | NA        | NA        | NA     | NA                                                                                | 1.31 | 1.76 | 0.97 |
| A_52_P502828 | NM_001008 | Pde2a     | 207728 | phosphodiesterase 2A, cGMP-stimulated                                             | 1.31 | 1.76 | 0.97 |

|              |           |          |        |                                                                                |      |      |      |
|--------------|-----------|----------|--------|--------------------------------------------------------------------------------|------|------|------|
| A_52_P180752 | NM_009419 | Tpst2    | 22022  | protein-tyrosine sulfotransferase 2                                            | 1.43 | 1.76 | 0.58 |
| A_51_P287418 | NM_008548 | Man1a    | 17155  | mannosidase 1, alpha                                                           | 2.37 | 1.76 | 0.01 |
| A_51_P443508 | NM_026438 | Ppa1     | 67895  | pyrophosphatase (inorganic) 1                                                  | 1.72 | 1.76 | 0.15 |
| A_52_P685422 | NA        | NA       | NA     | NA                                                                             | 1.69 | 1.76 | 0.17 |
| A_51_P513803 | AK015995  | Fbxo4    | 106052 | F-box protein 4                                                                | 1.92 | 1.76 | 0.06 |
| A_52_P949155 | NA        | NA       | NA     | NA                                                                             | 1.57 | 1.76 | 0.30 |
| A_51_P379775 | NM_134122 | Nrm      | 106582 | nurim (nuclear envelope membrane protein)                                      | 1.99 | 1.76 | 0.04 |
| A_51_P252725 | NM_008150 | Gpc4     | 14735  | glypican 4                                                                     | 1.85 | 1.76 | 0.07 |
| A_51_P124089 | NM_019581 | Gtpbp2   | 56055  | GTP binding protein 2                                                          | 1.50 | 1.76 | 0.44 |
| A_52_P174525 | BC043337  | Epb4.1   | 269587 | erythrocyte protein band 4.1                                                   | 1.52 | 1.76 | 0.40 |
| A_51_P256642 | NM_146145 | Jak1     | 16451  | Janus kinase 1                                                                 | 1.39 | 1.76 | 0.70 |
| A_52_P483101 | NM_015763 | Lpin1    | 14245  | lipin 1                                                                        | 1.31 | 1.76 | 0.97 |
| A_52_P41985  | NM_009070 | Rnps1    | 19826  | ribonucleic acid binding protein S1                                            | 1.44 | 1.76 | 0.55 |
| A_51_P377452 | NM_008677 | Ncf4     | 17972  | neutrophil cytosolic factor 4                                                  | 1.61 | 1.76 | 0.24 |
| A_52_P525705 | NA        | NA       | NA     | NA                                                                             | 1.45 | 1.76 | 0.53 |
| A_52_P305289 | NM_011190 | Psme2    | 19188  | proteasome (prosome, macropain) 28 subunit, beta                               | 2.06 | 1.76 | 0.03 |
| A_52_P150356 | NM_013760 | Dnajb9   | 27362  | Dnaj (Hsp40) homolog, subfamily B, member 9                                    | 1.36 | 1.75 | 0.77 |
| A_52_P286543 | NM_019927 | Arih1    | 23806  | ariadne ubiquitin-conjugating enzyme E2 binding protein homolog 1 (Drosophila) | 1.89 | 1.75 | 0.07 |
| A_52_P333749 | NM_001033 | Fam82a2  | 67809  | family with sequence similarity 82, member A2                                  | 1.75 | 1.75 | 0.14 |
| A_52_P266106 | NM_027554 | Usp38    | 74841  | ubiquitin specific peptidase 38                                                | 1.37 | 1.75 | 0.77 |
| A_52_P486979 | BC052908  | Vcpip1   | 70675  | valosin containing protein (p97)/p47 complex interacting protein 1             | 1.76 | 1.75 | 0.13 |
| A_52_P597775 | NM_181444 | Gprc5a   | 232431 | G protein-coupled receptor, family C, group 5, member A                        | 1.38 | 1.75 | 0.70 |
| A_51_P510096 | NM_172593 | Mier3    | 218613 | mesoderm induction early response 1, family member 3                           | 1.96 | 1.75 | 0.04 |
| A_52_P652446 | AK036186  | NA       | NA     | NA                                                                             | 2.02 | 1.75 | 0.04 |
| A_52_P239707 | NM_010914 | Nfyb     | 18045  | nuclear transcription factor-Y beta                                            | 1.75 | 1.75 | 0.14 |
| A_51_P103261 | NM_009198 | Slc17a1  | 20504  | solute carrier family 17 (sodium phosphate), member 1                          | 1.57 | 1.75 | 0.30 |
| A_51_P329469 | NM_173753 | Fnip1    | 216742 | folliculin interacting protein 1                                               | 1.61 | 1.75 | 0.24 |
| A_52_P676108 | NM_027187 | Rnaseh2a | 69724  | ribonuclease H2, large subunit                                                 | 1.53 | 1.75 | 0.34 |



|              |           |           |        |                                                                                               |      |      |      |
|--------------|-----------|-----------|--------|-----------------------------------------------------------------------------------------------|------|------|------|
| A_51_P186325 | AK010662  | Trnt1     | 70047  | tRNA nucleotidyl transferase, CCA-adding, 1                                                   | 1.49 | 1.75 | 0.46 |
| A_52_P60693  | NA        | NA        | NA     | NA                                                                                            | 1.40 | 1.74 | 0.67 |
| A_52_P221057 | NA        | NA        | NA     | NA                                                                                            | 1.70 | 1.74 | 0.17 |
| A_52_P589780 | BC050055  | Vps13a    | 271564 | vacuolar protein sorting 13A (yeast)<br>FERM, RhoGEF (Arhgef) and pleckstrin domain protein 1 | 1.54 | 1.74 | 0.34 |
| A_51_P332939 | NM_134082 | Farp1     | 223254 | (chondrocyte-derived)                                                                         | 1.47 | 1.74 | 0.50 |
| A_52_P419455 | NM_007413 | Adora2b   | 11541  | adenosine A2b receptor                                                                        | 1.33 | 1.74 | 0.86 |
| A_52_P261184 | AK085780  | Il1rl2    | 107527 | interleukin 1 receptor-like 2                                                                 | 1.37 | 1.74 | 0.77 |
| A_52_P158527 | NM_207680 | Bcl2l11   | 12125  | BCL2-like 11 (apoptosis facilitator)                                                          | 1.70 | 1.74 | 0.17 |
| A_51_P430165 | NM_146250 | Gpr1      | 241070 | G protein-coupled receptor 1                                                                  | 2.02 | 1.74 | 0.04 |
| A_52_P502754 | NM_009667 | Ampd3     | 11717  | adenosine monophosphate deaminase 3                                                           | 1.37 | 1.74 | 0.77 |
| A_52_P310530 | NM_053104 | Rbm9      | 93686  | RNA binding motif protein 9                                                                   | 1.49 | 1.74 | 0.44 |
| A_51_P347862 | NM_134156 | Actn1     | 109711 | actinin, alpha 1                                                                              | 1.62 | 1.74 | 0.22 |
| A_52_P168047 | NM_175094 | Pdhx      | 27402  | pyruvate dehydrogenase complex, component X                                                   | 1.84 | 1.74 | 0.09 |
| A_52_P638439 | NM_001037 | NA        | NA     | NA                                                                                            | 1.51 | 1.74 | 0.40 |
| A_52_P46384  | NM_029857 | Tmco4     | 77056  | transmembrane and coiled-coil domains 4                                                       | 1.89 | 1.74 | 0.07 |
| A_52_P83193  | AK011675  | Gm6649    | 626061 | E74-like factor 1 pseudogene                                                                  | 1.58 | 1.74 | 0.28 |
| A_52_P163489 | NM_001039 | Tmsb10    | 19240  | thymosin, beta 10                                                                             | 1.48 | 1.74 | 0.46 |
| A_51_P169516 | XM_141580 | Ppp1r3d   | 228966 | protein phosphatase 1, regulatory subunit 3D                                                  | 1.93 | 1.74 | 0.05 |
| A_51_P190499 | NM_019909 | NA        | NA     | NA                                                                                            | 1.44 | 1.74 | 0.55 |
| A_52_P374669 | XM_359326 | Kdm5a     | 214899 | lysine (K)-specific demethylase 5A                                                            | 1.57 | 1.74 | 0.30 |
| A_52_P660032 | NM_016856 | Cpsf2     | 51786  | cleavage and polyadenylation specific factor 2                                                | 1.45 | 1.74 | 0.53 |
| A_51_P319805 | NM_203492 | Mrgprg    | 381974 | MAS-related GPR, member G                                                                     | 1.40 | 1.74 | 0.67 |
| A_52_P207314 | XM_284398 | NA        | NA     | NA                                                                                            | 1.48 | 1.74 | 0.46 |
| A_52_P643784 | NM_013745 | Nufip1    | 27275  | nuclear fragile X mental retardation protein interacting<br>protein 1                         | 1.70 | 1.73 | 0.17 |
| A_52_P785927 | AK014122  | 3110035C0 | 73161  | RIKEN cDNA 3110035C09 gene                                                                    | 1.40 | 1.73 | 0.67 |
| A_51_P411217 | NM_027409 | Mospd1    | 70380  | motile sperm domain containing 1                                                              | 1.46 | 1.73 | 0.53 |
| A_51_P241733 | NM_145435 | Pyy       | 217212 | peptide YY                                                                                    | 1.32 | 1.73 | 0.91 |
| A_52_P677092 | XM_358384 | NA        | NA     | NA                                                                                            | 1.36 | 1.73 | 0.82 |
| A_51_P422629 | NM_011603 | Tbpl1     | 237336 | TATA box binding protein-like 1                                                               | 1.66 | 1.73 | 0.20 |
| A_52_P260126 | NM_026476 | 2610101N1 | 167958 | RIKEN cDNA 2610101N10 gene                                                                    | 1.42 | 1.73 | 0.61 |
| A_52_P475886 | NM_001024 | Rc3h1     | 381305 | RING CCCH (C3H) domains 1                                                                     | 1.37 | 1.73 | 0.77 |
| A_52_P316841 | AK078093  | A430057L1 | 320372 | RIKEN cDNA A430057L12 gene                                                                    | 1.53 | 1.73 | 0.37 |

|              |           |          |        |                                                                             |      |      |      |
|--------------|-----------|----------|--------|-----------------------------------------------------------------------------|------|------|------|
| A_52_P514061 | AK137625  | Padi4    | 18602  | peptidyl arginine deiminase, type IV                                        | 1.80 | 1.73 | 0.11 |
| A_52_P599917 | AK132725  | Whsc1l1  | 234135 | Wolf-Hirschhorn syndrome candidate 1-like 1 (human)                         | 1.59 | 1.73 | 0.27 |
| A_51_P218563 | NM_153566 | Yrdc     | 230734 | yrdC domain containing (E.coli)                                             | 1.37 | 1.73 | 0.77 |
| A_51_P421094 | BC059917  | Ascc3    | 77987  | activating signal cointegrator 1 complex subunit 3                          | 1.84 | 1.73 | 0.09 |
| A_51_P326030 | NM_145490 | BC011426 | 224893 | cDNA sequence BC011426                                                      | 1.51 | 1.73 | 0.40 |
| A_52_P455275 | NM_025280 | Kin      | 16588  | antigenic determinant of rec-A protein                                      | 2.08 | 1.73 | 0.03 |
| A_51_P394690 | NM_175036 | Leprot   | 230514 | leptin receptor overlapping transcript                                      | 2.00 | 1.73 | 0.04 |
| A_52_P33067  | AK080164  | NA       | NA     | NA                                                                          | 1.85 | 1.73 | 0.07 |
| A_52_P840743 | NA        | NA       | NA     | NA                                                                          | 1.52 | 1.73 | 0.40 |
| A_52_P594532 | AK129134  | Nupl1    | 71844  | nucleoporin like 1                                                          | 1.50 | 1.73 | 0.44 |
| A_51_P102174 | XM_898869 | NA       | NA     | NA                                                                          | 1.82 | 1.73 | 0.10 |
| A_52_P325797 | NA        | NA       | NA     | NA                                                                          | 1.53 | 1.73 | 0.37 |
| A_51_P377210 | NM_026368 | 5830433M | 67770  | RIKEN cDNA 5830433M19 gene                                                  | 1.46 | 1.73 | 0.53 |
| A_52_P583728 | NM_172276 | Sfrs8    | 231769 | splicing factor, arginine/serine-rich 8                                     | 1.56 | 1.73 | 0.30 |
| A_52_P250753 | NM_078478 | Ghitm    | 66092  | growth hormone inducible transmembrane protein                              | 1.63 | 1.72 | 0.22 |
| A_51_P102740 | AK084873  | NA       | NA     | NA                                                                          | 1.75 | 1.72 | 0.14 |
| A_51_P361426 | NM_026011 | Arl8b    | 67166  | ADP-ribosylation factor-like 8B                                             | 1.40 | 1.72 | 0.67 |
| A_52_P564544 | NM_024406 | Fabp4    | 11770  | fatty acid binding protein 4, adipocyte                                     | 1.40 | 1.72 | 0.67 |
| A_52_P581454 | NM_008847 | Pip5k1a  | 18720  | phosphatidylinositol-4-phosphate 5-kinase, type 1 alpha                     | 1.66 | 1.72 | 0.20 |
| A_52_P31593  | NM_011104 | Prkce    | 18754  | protein kinase C, epsilon                                                   | 1.56 | 1.72 | 0.30 |
| A_52_P635078 | NM_172668 | Lrp4     | 228357 | low density lipoprotein receptor-related protein 4                          | 1.72 | 1.72 | 0.15 |
| A_51_P487718 | NM_010093 | E2f3     | 13557  | E2F transcription factor 3                                                  | 1.96 | 1.72 | 0.04 |
| A_51_P198411 | NM_008163 | Grb2     | 14784  | growth factor receptor bound protein 2                                      | 1.95 | 1.72 | 0.05 |
| A_52_P367456 | XM_885934 | NA       | NA     | NA                                                                          | 1.92 | 1.72 | 0.06 |
| A_52_P354682 | NM_029001 | Elov17   | 74559  | ELOVL family member 7, elongation of long chain fatty acids (yeast)         | 1.37 | 1.72 | 0.77 |
| A_52_P605480 | XM_888040 | NA       | NA     | NA                                                                          | 1.40 | 1.72 | 0.67 |
| A_52_P331215 | AK161721  | Tlcd1    | 68385  | TLC domain containing 1<br>spastic paraplegia 20, spartin (Troyer syndrome) | 1.61 | 1.72 | 0.24 |
| A_52_P168271 | NM_144895 | Spg20    | 229285 | homolog (human)                                                             | 1.46 | 1.72 | 0.53 |

|               |           |         |        |                                                                  |      |      |      |
|---------------|-----------|---------|--------|------------------------------------------------------------------|------|------|------|
| A_52_P111031  | NM_001013 | Pcdh17  | 219228 | protocadherin 17                                                 | 1.55 | 1.72 | 0.33 |
| A_52_P266540  | BC057625  | Ubr4    | 69116  | ubiquitin protein ligase E3 component n-recognin 4               | 1.93 | 1.72 | 0.05 |
| A_51_P483473  | NM_011375 | St3gal5 | 20454  | ST3 beta-galactoside alpha-2,3-sialyltransferase 5               | 1.51 | 1.72 | 0.40 |
| A_52_P490343  | BC055708  | Pbrm1   | 66923  | polybromo 1                                                      | 1.57 | 1.72 | 0.30 |
| A_52_P17098   | AK078849  | Mpp7    | 75739  | membrane protein, palmitoylated 7 (MAGUK p55 subfamily member 7) | 1.40 | 1.72 | 0.67 |
| A_51_P427505  | NM_025673 | Golph3  | 66629  | golgi phosphoprotein 3                                           | 1.32 | 1.72 | 0.97 |
| A_51_P215106  | NM_008047 | Fstl1   | 14314  | folliculin-like 1                                                | 1.59 | 1.72 | 0.28 |
| A_51_P320444  | NM_009072 | Rock2   | 19878  | Rho-associated coiled-coil containing protein kinase 2           | 1.44 | 1.72 | 0.55 |
| A_52_P223495  | NM_010576 | Itga4   | 16401  | integrin alpha 4                                                 | 1.62 | 1.72 | 0.22 |
| A_51_P399223  | NM_009167 | Shc3    | 20418  | src homology 2 domain-containing transforming protein C3         | 1.50 | 1.72 | 0.44 |
| A_52_P43326   | NM_009062 | Rgs4    | 19736  | regulator of G-protein signaling 4                               | 1.69 | 1.72 | 0.17 |
| A_51_P103819  | NM_144551 | Trib2   | 217410 | tribbles homolog 2 (Drosophila)                                  | 1.85 | 1.72 | 0.09 |
| A_52_P254231  | NM_153566 | Yrdc    | 230734 | yrdC domain containing (E.coli)                                  | 1.68 | 1.71 | 0.18 |
| A_52_P434052  | NM_001039 | Wdr37   | 207615 | WD repeat domain 37                                              | 1.66 | 1.71 | 0.20 |
| A_52_P129388  | NM_025685 | Col27a1 | 373864 | collagen, type XXVII, alpha 1                                    | 1.50 | 1.71 | 0.44 |
| A_52_P254174  | NM_008173 | Nr3c1   | 14815  | nuclear receptor subfamily 3, group C, member 1                  | 1.30 | 1.71 | 1.04 |
| A_52_P636151  | NM_025673 | Golph3  | 66629  | golgi phosphoprotein 3                                           | 1.41 | 1.71 | 0.61 |
| A_52_P569364  | XM_194424 | NA      | NA     | NA                                                               | 1.52 | 1.71 | 0.37 |
| A_52_P73836   | NA        | NA      | NA     | NA                                                               | 1.99 | 1.71 | 0.04 |
| A_51_P169693  | NM_198095 | Bst2    | 69550  | bone marrow stromal cell antigen 2                               | 1.40 | 1.71 | 0.67 |
| A_52_P589268  | NM_001005 | Smg7    | 226517 | Smg-7 homolog, nonsense mediated mRNA decay factor (C. elegans)  | 1.79 | 1.71 | 0.11 |
| A_52_P1179988 | AK050242  | NA      | NA     | NA                                                               | 1.62 | 1.71 | 0.22 |
| A_51_P142057  | NM_007458 | Ap2a1   | 11771  | adaptor protein complex AP-2, alpha 1 subunit                    | 1.67 | 1.71 | 0.20 |
| A_51_P371912  | NM_177715 | Kctd12  | 239217 | potassium channel tetramerisation domain containing 12           | 1.54 | 1.71 | 0.34 |
| A_51_P256369  | NM_199322 | Dot1l   | 208266 | DOT1-like, histone H3 methyltransferase (S. cerevisiae)          | 1.51 | 1.71 | 0.40 |
| A_51_P101196  | NM_011189 | Psme1   | 19186  | proteasome (prosome, macropain) 28 subunit, alpha                | 1.78 | 1.71 | 0.12 |

|              |           |           |        |                                                                                |      |      |      |
|--------------|-----------|-----------|--------|--------------------------------------------------------------------------------|------|------|------|
| A_52_P135822 | NA        | NA        | NA     | NA                                                                             | 1.38 | 1.71 | 0.70 |
| A_51_P239766 | NM_019676 | Plcd1     | 18799  | phospholipase C, delta 1                                                       | 1.47 | 1.71 | 0.50 |
| A_52_P541802 | NM_026820 | Ifitm1    | 68713  | interferon induced transmembrane protein 1                                     | 1.37 | 1.71 | 0.77 |
| A_52_P673421 | NM_178606 | Reep3     | 28193  | receptor accessory protein 3                                                   | 1.58 | 1.71 | 0.28 |
| A_52_P121675 | NM_009884 | Cebpg     | 12611  | CCAAT/enhancer binding protein (C/EBP), gamma                                  | 1.45 | 1.71 | 0.55 |
| A_51_P338397 | NM_026145 | Kctd10    | 330171 | potassium channel tetramerisation domain containing 10                         | 1.63 | 1.71 | 0.22 |
| A_51_P377760 | NM_011882 | Rnasel    | 24014  | ribonuclease L (2', 5'-oligoadenylate synthetase-dependent)                    | 1.92 | 1.71 | 0.06 |
| A_51_P211584 | XM_148244 | NA        | NA     | NA                                                                             | 1.53 | 1.71 | 0.37 |
| A_52_P652316 | NM_153058 | Mapre2    | 212307 | microtubule-associated protein, RP/EB family, member 2                         | 1.37 | 1.71 | 0.77 |
| A_52_P259087 | NM_009939 | Cops2     | 12848  | COP9 (constitutive photomorphogenic) homolog, subunit 2 (Arabidopsis thaliana) | 1.75 | 1.71 | 0.14 |
| A_52_P553890 | AK135584  | Itgb3     | 16416  | integrin beta 3                                                                | 1.57 | 1.71 | 0.30 |
| A_51_P518698 | AK011534  | Bmpr2     | 12168  | bone morphogenic protein receptor, type II (serine/threonine kinase)           | 1.79 | 1.71 | 0.11 |
| A_51_P495462 | AK018118  | Gad2      | 14417  | glutamic acid decarboxylase 2                                                  | 1.61 | 1.71 | 0.24 |
| A_51_P186415 | AK173243  | Ssh2      | 237860 | slingshot homolog 2 (Drosophila)                                               | 1.70 | 1.70 | 0.17 |
| A_52_P482875 | NM_172406 | Trak2     | 70827  | trafficking protein, kinesin binding 2                                         | 1.88 | 1.70 | 0.07 |
| A_51_P246166 | NM_007969 | Expi      | 14038  | extracellular proteinase inhibitor                                             | 1.36 | 1.70 | 0.82 |
| A_52_P634090 | NM_013822 | Jag1      | 16449  | jagged 1                                                                       | 1.49 | 1.70 | 0.44 |
| A_51_P324082 | NM_013634 | Med1      | 19014  | mediator complex subunit 1                                                     | 1.75 | 1.70 | 0.14 |
| A_51_P439118 | NA        | NA        | NA     | NA                                                                             | 1.33 | 1.70 | 0.86 |
| A_51_P394387 | NM_024254 | 2410042D2 | 72425  | RIKEN cDNA 2410042D21 gene                                                     | 1.38 | 1.70 | 0.70 |
| A_51_P408123 | AK036565  | NA        | NA     | NA                                                                             | 1.44 | 1.70 | 0.55 |
| A_51_P233027 | NM_001033 | Fam82a2   | 67809  | family with sequence similarity 82, member A2                                  | 1.68 | 1.70 | 0.18 |
| A_52_P512196 | NM_181730 | Polr1d    | 20018  | polymerase (RNA) I polypeptide D                                               | 1.76 | 1.70 | 0.13 |
| A_52_P479647 | NM_198013 | Cuedc1    | 103841 | CUE domain containing 1                                                        | 1.55 | 1.70 | 0.33 |
| A_52_P75659  | NM_181411 | Aftph     | 216549 | aftiphilin                                                                     | 1.66 | 1.70 | 0.20 |
| A_52_P160121 | NM_029510 | Bcor      | 71458  | BCL6 interacting corepressor                                                   | 1.66 | 1.70 | 0.20 |
| A_52_P496935 | NM_030184 | Armc9     | 78795  | armadillo repeat containing 9                                                  | 1.38 | 1.70 | 0.70 |
| A_51_P499891 | NM_030675 | Krit1     | 79264  | KRIT1, ankyrin repeat containing                                               | 1.63 | 1.70 | 0.22 |

|              |           |           |        |                                                                   |      |      |      |
|--------------|-----------|-----------|--------|-------------------------------------------------------------------|------|------|------|
| A_52_P363110 | NM_010207 | Fgfr2     | 14183  | fibroblast growth factor receptor 2                               | 1.80 | 1.70 | 0.11 |
| A_52_P431859 | NA        | NA        | NA     | NA                                                                | 1.77 | 1.69 | 0.12 |
| A_52_P574881 | NM_008316 | Hus1      | 15574  | Hus1 homolog ( <i>S. pombe</i> )                                  | 1.75 | 1.69 | 0.14 |
| A_51_P127527 | NM_031194 | Slc22a8   | 19879  | solute carrier family 22 (organic anion transporter), member 8    | 1.37 | 1.69 | 0.77 |
| A_51_P167803 | NM_008800 | Pde1b     | 18574  | phosphodiesterase 1B, Ca <sup>2+</sup> -calmodulin dependent      | 1.58 | 1.69 | 0.28 |
| A_52_P440508 | AK041801  | NA        | NA     | NA                                                                | 1.73 | 1.69 | 0.15 |
| A_51_P385718 | NM_026862 | Cd177     | 68891  | CD177 antigen                                                     | 2.06 | 1.69 | 0.03 |
| A_52_P10732  | NM_001048 | Mtap6     | 17760  | microtubule-associated protein 6                                  | 1.48 | 1.69 | 0.46 |
| A_51_P326091 | BC023121  | Cflar     | 12633  | CASP8 and FADD-like apoptosis regulator                           | 1.53 | 1.69 | 0.37 |
| A_51_P172589 | AK004627  | 1200007C1 | 74119  | RIKEN cDNA 1200007C13 gene                                        | 1.67 | 1.69 | 0.20 |
| A_52_P90337  | NM_010794 | Mgat1     | 17308  | mannoside acetylglucosaminyltransferase 1                         | 1.34 | 1.69 | 0.86 |
| A_51_P334619 | X16493    | Zfp1      | 22640  | zinc finger protein 1                                             | 1.61 | 1.69 | 0.24 |
| A_52_P6070   | NM_027627 | 4931408AC | 70967  | RIKEN cDNA 4931408A02 gene                                        | 1.47 | 1.69 | 0.50 |
| A_51_P118902 | NM_008551 | Mapkapk2  | 17164  | MAP kinase-activated protein kinase 2                             | 1.53 | 1.69 | 0.37 |
| A_51_P175555 | NM_134058 | Pelo      | 105083 | pelota homolog ( <i>Drosophila</i> )                              | 1.44 | 1.69 | 0.55 |
| A_51_P336083 | NM_178775 | Rps6kc1   | 320119 | ribosomal protein S6 kinase polypeptide 1                         | 1.84 | 1.69 | 0.09 |
| A_51_P449194 | AK084851  | D430001L0 | 320584 | RIKEN cDNA D430001L07 gene                                        | 1.42 | 1.69 | 0.58 |
| A_51_P359333 | NM_010209 | Fh1       | 14194  | fumarate hydratase 1                                              | 1.66 | 1.69 | 0.20 |
| A_52_P262967 | NM_016676 | Rab10     | 19325  | RAB10, member RAS oncogene family                                 | 1.92 | 1.69 | 0.06 |
| A_51_P315682 | NM_183029 | Igf2bp2   | 319765 | insulin-like growth factor 2 mRNA binding protein 2               | 1.59 | 1.69 | 0.27 |
| A_51_P441979 | NM_008847 | Pip5k1a   | 18720  | phosphatidylinositol-4-phosphate 5-kinase, type 1 alpha           | 1.61 | 1.69 | 0.24 |
| A_51_P273234 | NM_147055 | OlfR649   | 259057 | olfactory receptor 649                                            | 1.39 | 1.69 | 0.67 |
| A_51_P167232 | NM_009806 | Cask      | 12361  | calcium/calmodulin-dependent serine protein kinase (MAGUK family) | 1.43 | 1.69 | 0.58 |
| A_52_P320374 | NA        | NA        | NA     | NA                                                                | 1.34 | 1.69 | 0.86 |
| A_52_P681771 | NM_025802 | Pnpla2    | 66853  | patatin-like phospholipase domain containing 2                    | 1.58 | 1.69 | 0.28 |
| A_52_P197436 | NA        | NA        | NA     | NA                                                                | 1.48 | 1.69 | 0.46 |
| A_52_P105801 | AK140163  | Arsb      | 11881  | arylsulfatase B                                                   | 1.44 | 1.69 | 0.55 |
| A_52_P601727 | AK052688  | Cfh       | 12628  | complement component factor h                                     | 1.43 | 1.69 | 0.58 |
| A_51_P262079 | NM_010394 | H2-Q7     | 15018  | histocompatibility 2, Q region locus 7                            | 1.43 | 1.69 | 0.58 |

|              |           |           |        |                                                                                               |      |      |      |
|--------------|-----------|-----------|--------|-----------------------------------------------------------------------------------------------|------|------|------|
| A_51_P490397 | NM_133692 | Pold3     | 67967  | polymerase (DNA-directed), delta 3, accessory subunit                                         | 1.91 | 1.68 | 0.06 |
| A_52_P552092 | AK035614  | Adat1     | 30947  | adenosine deaminase, tRNA-specific 1                                                          | 1.46 | 1.68 | 0.53 |
| A_52_P613358 | NM_013760 | Dnajb9    | 27362  | Dnaj (Hsp40) homolog, subfamily B, member 9                                                   | 1.32 | 1.68 | 0.91 |
| A_52_P170761 | NM_022979 | Nup98     | 269966 | nucleoporin 98                                                                                | 1.82 | 1.68 | 0.09 |
| A_51_P388374 | NM_026141 | Ppil4     | 67418  | peptidylprolyl isomerase (cyclophilin)-like 4                                                 | 1.67 | 1.68 | 0.20 |
| A_52_P488305 | NM_023668 | Ndel1     | 83431  | nuclear distribution gene E-like homolog 1 (A. nidulans)                                      | 1.48 | 1.68 | 0.50 |
| A_52_P469789 | NM_007588 | Calcr     | 12311  | calcitonin receptor                                                                           | 1.54 | 1.68 | 0.34 |
| A_52_P196138 | BC038386  | Cep110    | 26920  | centrosomal protein 110                                                                       | 1.63 | 1.68 | 0.22 |
| A_51_P497171 | NM_008534 | Ly9       | 17085  | lymphocyte antigen 9                                                                          | 1.55 | 1.68 | 0.34 |
| A_51_P147034 | NM_027407 | Ica1l     | 70375  | islet cell autoantigen 1-like                                                                 | 1.41 | 1.68 | 0.61 |
| A_51_P324273 | NM_177267 | Dcaf5     | 320808 | DDB1 and CUL4 associated factor 5                                                             | 1.94 | 1.68 | 0.05 |
| A_52_P173485 | NM_144937 | Usp3      | 235441 | ubiquitin specific peptidase 3                                                                | 1.35 | 1.68 | 0.82 |
| A_51_P325552 | NM_026457 | Spert     | 67926  | spermatid associated                                                                          | 1.38 | 1.68 | 0.70 |
| A_52_P620023 | NM_026487 | Atad1     | 67979  | ATPase family, AAA domain containing 1<br>COX15 homolog, cytochrome c oxidase assembly        | 1.32 | 1.68 | 0.91 |
| A_51_P354744 | NM_144874 | Cox15     | 226139 | protein (yeast)                                                                               | 1.70 | 1.68 | 0.17 |
| A_51_P516922 | NM_173753 | Fnip1     | 216742 | folliculin interacting protein 1                                                              | 1.47 | 1.68 | 0.50 |
| A_52_P545373 | AK051634  | NA        | NA     | NA                                                                                            | 1.74 | 1.68 | 0.15 |
| A_51_P498242 | NM_024242 | Riok1     | 71340  | RIO kinase 1 (yeast)                                                                          | 1.49 | 1.68 | 0.44 |
| A_52_P66596  | XM_205469 | Dmrtb1    | 56296  | DMRT-like family B with proline-rich C-terminal, 1                                            | 1.84 | 1.68 | 0.09 |
| A_52_P162697 | NM_027514 | Pvr       | 52118  | poliovirus receptor                                                                           | 1.64 | 1.68 | 0.21 |
| A_52_P462125 | NM_001039 | Gm13034   | 627585 | predicted gene 13034                                                                          | 1.49 | 1.68 | 0.44 |
| A_52_P497235 | NM_026985 | 1810033B1 | 69189  | RIKEN cDNA 1810033B17 gene                                                                    | 1.47 | 1.68 | 0.50 |
| A_52_P307628 | NM_028767 | Foxp4     | 74123  | forkhead box P4                                                                               | 1.65 | 1.68 | 0.20 |
| A_52_P69867  | NM_028292 | Ppme1     | 72590  | protein phosphatase methylesterase 1                                                          | 1.37 | 1.68 | 0.77 |
| A_52_P572284 | NM_008640 | Laptm4a   | 17775  | lysosomal-associated protein transmembrane 4A<br>membrane protein, palmitoylated 7 (MAGUK p55 | 1.53 | 1.68 | 0.37 |
| A_51_P378227 | AK141108  | Mpp7      | 75739  | subfamily member 7)                                                                           | 1.56 | 1.68 | 0.30 |
| A_51_P145533 | NM_020012 | Rnf14     | 56736  | ring finger protein 14                                                                        | 1.83 | 1.68 | 0.09 |
| A_52_P492081 | NM_130447 | Dusp16    | 70686  | dual specificity phosphatase 16                                                               | 1.42 | 1.68 | 0.61 |
| A_52_P522023 | AK146582  | Alkbh1    | 211064 | alkB, alkylation repair homolog 1 (E. coli)                                                   | 1.75 | 1.68 | 0.14 |

|              |           |          |        |                                                                      |      |      |      |
|--------------|-----------|----------|--------|----------------------------------------------------------------------|------|------|------|
| A_51_P141860 | NM_134015 | Fbxw11   | 103583 | F-box and WD-40 domain protein 11                                    | 1.58 | 1.68 | 0.28 |
| A_52_P330984 | AK089989  | Lin9     | 72568  | lin-9 homolog (C. elegans)                                           | 1.70 | 1.68 | 0.16 |
| A_52_P342940 | NM_016694 | Park2    | 50873  | Parkinson disease (autosomal recessive, juvenile) 2, parkin          | 1.34 | 1.67 | 0.86 |
| A_52_P368532 | BG961926  | NA       | NA     | NA                                                                   | 1.33 | 1.67 | 0.86 |
| A_51_P283639 | NM_001029 | Sec23ip  | 207352 | Sec23 interacting protein                                            | 1.40 | 1.67 | 0.67 |
| A_51_P521052 | NM_029627 | Ly6k     | 76486  | lymphocyte antigen 6 complex, locus K                                | 1.29 | 1.67 | 1.04 |
| A_51_P494122 | NM_025462 | Ece2     | 107522 | endothelin converting enzyme 2                                       | 1.46 | 1.67 | 0.53 |
| A_52_P618807 | NM_133656 | Crk      | 12928  | v-crk sarcoma virus CT10 oncogene homolog (avian)                    | 1.78 | 1.67 | 0.12 |
| A_51_P262699 | NA        | NA       | NA     | NA                                                                   | 1.65 | 1.67 | 0.20 |
| A_51_P268103 | NM_172253 | Twistnb  | 28071  | TWIST neighbor                                                       | 1.59 | 1.67 | 0.27 |
| A_52_P378406 | NM_025517 | Rtcd1    | 66368  | RNA terminal phosphate cyclase domain 1                              | 1.88 | 1.67 | 0.07 |
| A_52_P52263  | NM_001044 | D17Wsu92 | 224647 | DNA segment, Chr 17, Wayne State University 92, expressed            | 1.42 | 1.67 | 0.61 |
| A_52_P346803 | NM_172291 | Foxred1  | 235169 | FAD-dependent oxidoreductase domain containing 1                     | 1.69 | 1.67 | 0.18 |
| A_51_P312327 | NM_022415 | Ptges    | 64292  | prostaglandin E synthase                                             | 1.38 | 1.67 | 0.70 |
| A_51_P451075 | NM_009722 | Atp2a2   | 11938  | ATPase, Ca++ transporting, cardiac muscle, slow twitch 2             | 1.61 | 1.67 | 0.24 |
| A_51_P453948 | NM_007879 | Drg1     | 13494  | developmentally regulated GTP binding protein 1                      | 1.42 | 1.67 | 0.58 |
| A_51_P446192 | AK132230  | Esf1     | 66580  | ESF1, nucleolar pre-rRNA processing protein, homolog (S. cerevisiae) | 1.37 | 1.67 | 0.77 |
| A_52_P223333 | NM_144860 | Mib1     | 225164 | mindbomb homolog 1 (Drosophila)                                      | 1.66 | 1.67 | 0.20 |
| A_51_P505774 | BC052528  | Rbbp6    | 19647  | retinoblastoma binding protein 6                                     | 1.52 | 1.67 | 0.37 |
| A_51_P236412 | NM_016912 | Cdkl2    | 53886  | cyclin-dependent kinase-like 2 (CDC2-related kinase)                 | 1.55 | 1.67 | 0.33 |
| A_52_P127130 | NM_031195 | Msr1     | 20288  | macrophage scavenger receptor 1                                      | 1.45 | 1.67 | 0.53 |
| A_52_P59006  | AK003545  | St13     | 70356  | suppression of tumorigenicity 13                                     | 1.40 | 1.67 | 0.67 |
| A_52_P490263 | NM_013819 | H2-M3    | 14991  | histocompatibility 2, M region locus 3                               | 1.33 | 1.67 | 0.86 |
| A_52_P77332  | NM_022655 | Ireb2    | 64602  | iron responsive element binding protein 2                            | 1.47 | 1.67 | 0.50 |
| A_52_P59318  | NM_133832 | Rdh10    | 98711  | retinol dehydrogenase 10 (all-trans)                                 | 1.34 | 1.67 | 0.86 |
| A_51_P322095 | NM_026924 | Ovol2    | 107586 | ovo-like 2 (Drosophila)                                              | 1.39 | 1.67 | 0.67 |

|               |           |         |        |                                                                                              |      |      |      |
|---------------|-----------|---------|--------|----------------------------------------------------------------------------------------------|------|------|------|
| A_52_P75971   | NM_026599 | Cgnl1   | 68178  | cingulin-like 1                                                                              | 1.31 | 1.67 | 0.97 |
| A_52_P371946  | NM_010579 | Eif6    | 16418  | eukaryotic translation initiation factor 6                                                   | 1.77 | 1.67 | 0.13 |
| A_52_P258291  | NM_011808 | Ets1    | 23871  | E26 avian leukemia oncogene 1, 5' domain                                                     | 1.78 | 1.67 | 0.12 |
| A_52_P153147  | NA        | NA      | NA     | NA                                                                                           | 1.90 | 1.67 | 0.07 |
| A_52_P1083441 | AK020213  | Ddx3y   | 26900  | DEAD (Asp-Glu-Ala-Asp) box polypeptide 3, Y-linked                                           | 1.49 | 1.67 | 0.46 |
| A_51_P330044  | NM_028979 | Cyp2j9  | 74519  | cytochrome P450, family 2, subfamily j, polypeptide 9                                        | 1.34 | 1.67 | 0.86 |
| A_51_P152191  | AK122486  | Xpo5    | 72322  | exportin 5                                                                                   | 1.59 | 1.67 | 0.27 |
| A_52_P78257   | NM_031257 | Plekha2 | 83436  | pleckstrin homology domain-containing, family A (phosphoinositide binding specific) member 2 | 1.45 | 1.67 | 0.55 |
| A_51_P520397  | AK021321  | Gm9802  | 78589  | predicted gene 9802                                                                          | 1.48 | 1.67 | 0.46 |
| A_51_P224872  | BC076568  | Syne2   | 319565 | synaptic nuclear envelope 2                                                                  | 1.95 | 1.66 | 0.05 |
| A_52_P453684  | AK021086  | Lrp6    | 16974  | low density lipoprotein receptor-related protein 6                                           | 1.88 | 1.66 | 0.07 |
| A_51_P271803  | NM_145354 | Nsun2   | 28114  | NOL1/NOP2/Sun domain family member 2                                                         | 1.29 | 1.66 | 1.04 |
| A_51_P387348  | BC110692  | Adora2a | 11540  | adenosine A2a receptor                                                                       | 1.66 | 1.66 | 0.20 |
| A_52_P234073  | NM_013463 | Gla     | 11605  | galactosidase, alpha                                                                         | 1.78 | 1.66 | 0.12 |
| A_51_P466633  | NM_011391 | Slc16a7 | 20503  | solute carrier family 16 (monocarboxylic acid transporters), member 7                        | 1.31 | 1.66 | 0.97 |
| A_51_P199187  | NM_026062 | Fam69a  | 67266  | family with sequence similarity 69, member A                                                 | 1.56 | 1.66 | 0.33 |
| A_52_P480351  | XM_985144 | NA      | NA     | NA                                                                                           | 1.51 | 1.66 | 0.40 |
| A_51_P279505  | NM_019743 | Rybp    | 56353  | RING1 and YY1 binding protein                                                                | 1.45 | 1.66 | 0.53 |
| A_52_P59124   | NM_001025 | Ms4a7   | 109225 | membrane-spanning 4-domains, subfamily A, member 7                                           | 1.37 | 1.66 | 0.77 |
| A_52_P145412  | NM_030168 | Rictor  | 78757  | RPTOR independent companion of MTOR, complex 2                                               | 1.61 | 1.66 | 0.24 |
| A_52_P584293  | NM_181415 | Atrnl1  | 226255 | attractin like 1                                                                             | 1.54 | 1.66 | 0.34 |
| A_51_P402458  | NM_009674 | Anxa7   | 11750  | annexin A7                                                                                   | 1.41 | 1.66 | 0.67 |
| A_51_P386382  | NM_025858 | Shisa5  | 66940  | shisa homolog 5 ( <i>Xenopus laevis</i> )                                                    | 1.41 | 1.66 | 0.61 |
| A_52_P327615  | NM_181070 | Rab18   | 19330  | RAB18, member RAS oncogene family                                                            | 1.53 | 1.66 | 0.37 |
| A_51_P242027  | NM_018753 | Ywhab   | 54401  | tyrosine 3-monooxygenase/tryptophan 5-monooxygenase activation protein, beta polypeptide     | 1.50 | 1.66 | 0.44 |



|              |           |            |        |                                                                                             |      |      |      |
|--------------|-----------|------------|--------|---------------------------------------------------------------------------------------------|------|------|------|
| A_51_P359259 | NM_027569 | Spag9      | 70834  | sperm associated antigen 9                                                                  | 1.30 | 1.66 | 1.04 |
| A_51_P506236 | NM_016691 | Clcn5      | 12728  | chloride channel 5                                                                          | 1.59 | 1.66 | 0.28 |
| A_52_P336643 | XM_354566 | NA         | NA     | NA                                                                                          | 1.73 | 1.66 | 0.15 |
| A_51_P467798 | NM_022018 | Fam129a    | 63913  | family with sequence similarity 129, member A                                               | 1.64 | 1.66 | 0.21 |
| A_52_P386468 | NM_007700 | Chuk       | 12675  | conserved helix-loop-helix ubiquitous kinase                                                | 1.42 | 1.66 | 0.61 |
| A_52_P421673 | NM_001037 | Samd4      | 74480  | sterile alpha motif domain containing 4                                                     | 1.72 | 1.66 | 0.15 |
| A_51_P332627 | NM_016776 | Mybbp1a    | 18432  | MYB binding protein (P160) 1a                                                               | 1.45 | 1.66 | 0.53 |
| A_51_P415855 | NM_010559 | Il6ra      | 16194  | interleukin 6 receptor, alpha<br>sema domain, transmembrane domain (TM), and                | 1.74 | 1.66 | 0.15 |
| A_51_P324251 | NM_011351 | Sema6c     | 20360  | cytoplasmic domain, (semaphorin) 6C                                                         | 1.35 | 1.66 | 0.82 |
| A_51_P451176 | NM_024469 | Bhlhe41    | 79362  | basic helix-loop-helix family, member e41                                                   | 1.73 | 1.66 | 0.15 |
| A_51_P393574 | NM_001039 | Tctn1      | 654470 | tectonic family member 1                                                                    | 1.37 | 1.66 | 0.77 |
| A_52_P249672 | AK014716  | 4833417J2  | 74604  | RIKEN cDNA 4833417J20 gene                                                                  | 1.67 | 1.66 | 0.18 |
| A_52_P471913 | NM_015751 | Abce1      | 24015  | ATP-binding cassette, sub-family E (OABP), member 1                                         | 1.53 | 1.66 | 0.37 |
| A_52_P21574  | AK033091  | Pdlim7     | 67399  | PDZ and LIM domain 7<br>stromal membrane-associated GTPase-activating                       | 1.68 | 1.66 | 0.18 |
| A_52_P25560  | NM_133716 | Smap2      | 69780  | protein 2                                                                                   | 1.56 | 1.65 | 0.33 |
| A_51_P498772 | NM_144953 | 1700019D03 | 67080  | RIKEN cDNA 1700019D03 gene                                                                  | 1.30 | 1.65 | 1.04 |
| A_52_P77983  | NM_009551 | Zfand5     | 22682  | zinc finger, AN1-type domain 5                                                              | 1.52 | 1.65 | 0.37 |
| A_52_P127720 | BC069183  | Sp100      | 20684  | nuclear antigen Sp100<br>nudix (nucleoside diphosphate linked moiety X)-type                | 1.40 | 1.65 | 0.67 |
| A_51_P163305 | NM_016918 | Nudt5      | 53893  | motif 5                                                                                     | 1.51 | 1.65 | 0.40 |
| A_51_P286610 | NM_001038 | Rabgap1l   | 29809  | RAB GTPase activating protein 1-like                                                        | 1.69 | 1.65 | 0.17 |
| A_52_P274960 | NM_001005 | Arhgap30   | 226652 | Rho GTPase activating protein 30                                                            | 1.30 | 1.65 | 0.97 |
| A_51_P384318 | NM_023143 | C1ra       | 50909  | complement component 1, r subcomponent A                                                    | 1.53 | 1.65 | 0.37 |
| A_51_P183400 | NM_146194 | Picalm     | 233489 | phosphatidylinositol binding clathrin assembly protein                                      | 1.50 | 1.65 | 0.44 |
| A_51_P362818 | BC031139  | Nlrp6      | 101613 | NLR family, pyrin domain containing 6                                                       | 1.33 | 1.65 | 0.86 |
| A_52_P372032 | NM_019553 | Ddx21      | 56200  | DEAD (Asp-Glu-Ala-Asp) box polypeptide 21                                                   | 1.61 | 1.65 | 0.24 |
| A_51_P488308 | NM_139061 | Vps54      | 245944 | vacuolar protein sorting 54 (yeast)<br>cysteine rich transmembrane BMP regulator 1 (chordin | 1.85 | 1.65 | 0.07 |
| A_52_P46447  | AK053197  | Crim1      | 50766  | like)                                                                                       | 1.32 | 1.65 | 0.97 |
| A_52_P162695 | NM_027514 | Pvr        | 52118  | poliovirus receptor                                                                         | 1.40 | 1.65 | 0.67 |

|              |           |           |        |                                                                                               |      |      |      |
|--------------|-----------|-----------|--------|-----------------------------------------------------------------------------------------------|------|------|------|
| A_51_P405135 | XM_896646 | NA        | NA     | NA                                                                                            | 1.86 | 1.65 | 0.07 |
| A_51_P251357 | NM_016748 | Ctps      | 51797  | cytidine 5'-triphosphate synthase                                                             | 1.31 | 1.65 | 0.97 |
| A_51_P485510 | NM_029825 | Scfd1     | 76983  | Sec1 family domain containing 1                                                               | 1.32 | 1.65 | 0.91 |
| A_51_P186735 | NM_146151 | Tesk2     | 230661 | testis-specific kinase 2                                                                      | 1.43 | 1.65 | 0.58 |
| A_51_P180001 | BC096465  | Eif2c2    | 239528 | eukaryotic translation initiation factor 2C, 2                                                | 1.49 | 1.65 | 0.44 |
| A_52_P82991  | NA        | NA        | NA     | NA                                                                                            | 1.38 | 1.65 | 0.70 |
| A_51_P223177 | NM_028791 | Ftsjd2    | 74157  | FtsJ methyltransferase domain containing 2                                                    | 1.35 | 1.65 | 0.82 |
| A_51_P409132 | NM_177325 | Tsr1      | 104662 | TSR1, 20S rRNA accumulation, homolog (yeast)                                                  | 1.49 | 1.65 | 0.44 |
| A_52_P22073  | NM_010918 | Nktr      | 18087  | natural killer tumor recognition sequence                                                     | 1.61 | 1.64 | 0.24 |
| A_51_P320466 | NM_011299 | Rps6ka2   | 20112  | ribosomal protein S6 kinase, polypeptide 2                                                    | 1.60 | 1.64 | 0.24 |
| A_51_P432538 | NM_010397 | H2-T22    | 15039  | histocompatibility 2, T region locus 22                                                       | 1.42 | 1.64 | 0.58 |
| A_52_P50496  | AK168517  | H2-K1     | 14972  | histocompatibility 2, K1, K region                                                            | 1.32 | 1.64 | 0.91 |
| A_51_P162612 | NM_024275 | Map4k5    | 399510 | mitogen-activated protein kinase kinase kinase kinase 5                                       | 1.38 | 1.64 | 0.70 |
| A_51_P509609 | NM_053082 | Tspan4    | 64540  | tetraspanin 4                                                                                 | 1.60 | 1.64 | 0.27 |
| A_52_P276815 | NM_001005 | ErbB2ip   | 59079  | ErbB2 interacting protein                                                                     | 1.40 | 1.64 | 0.67 |
| A_51_P306839 | NM_025465 | 1810029B1 | 66282  | RIKEN cDNA 1810029B16 gene                                                                    | 1.37 | 1.64 | 0.77 |
| A_52_P338110 | NM_024190 | Chmp1b    | 67064  | chromatin modifying protein 1B                                                                | 1.57 | 1.64 | 0.30 |
| A_51_P248097 | AK044873  | NA        | NA     | NA                                                                                            | 1.56 | 1.64 | 0.33 |
| A_51_P515768 | AK033091  | Pdlim7    | 67399  | PDZ and LIM domain 7                                                                          | 1.62 | 1.64 | 0.22 |
| A_51_P479390 | AK007436  | Adamts9   | 101401 | a disintegrin-like and metallopeptidase (reprolysin type) with thrombospondin type 1 motif, 9 | 1.46 | 1.64 | 0.50 |
| A_52_P197826 | NM_010397 | H2-T22    | 15039  | histocompatibility 2, T region locus 22                                                       | 1.34 | 1.64 | 0.86 |
| A_51_P257960 | NM_011967 | Psma5     | 26442  | proteasome (prosome, macropain) subunit, alpha type 5                                         | 1.63 | 1.64 | 0.22 |
| A_52_P667157 | NA        | NA        | NA     | NA                                                                                            | 1.59 | 1.64 | 0.27 |
| A_51_P479808 | NM_027418 | Mapk6     | 50772  | mitogen-activated protein kinase 6                                                            | 1.42 | 1.64 | 0.58 |
| A_52_P472465 | NM_175683 | Dclre1c   | 227525 | DNA cross-link repair 1C, PSO2 homolog ( <i>S. cerevisiae</i> )                               | 1.33 | 1.64 | 0.91 |
| A_51_P323081 | NM_198161 | Bhlhb9    | 70237  | basic helix-loop-helix domain containing, class B9                                            | 1.42 | 1.64 | 0.61 |
| A_52_P662600 | NM_019808 | Pdlim5    | 56376  | PDZ and LIM domain 5                                                                          | 1.59 | 1.64 | 0.28 |
| A_52_P397385 | AK032013  | Anxa7     | 11750  | annexin A7                                                                                    | 1.38 | 1.64 | 0.70 |

|              |           |           |        |                                                            |      |      |      |
|--------------|-----------|-----------|--------|------------------------------------------------------------|------|------|------|
|              |           |           |        | peroxisomal delta3, delta2-enoyl-Coenzyme A                |      |      |      |
| A_51_P394665 | NM_011868 | Peci      | 23986  | isomerase                                                  | 1.53 | 1.64 | 0.37 |
| A_52_P418665 | NM_029512 | Ttpal     | 76080  | tocopherol (alpha) transfer protein-like                   | 1.51 | 1.63 | 0.40 |
| A_52_P460037 | NM_020575 | 7-Mar     | 57438  | membrane-associated ring finger (C3HC4) 7                  | 1.33 | 1.63 | 0.91 |
| A_52_P512309 | NA        | NA        | NA     | NA                                                         | 1.31 | 1.63 | 0.97 |
| A_51_P327075 | NM_130864 | Acaa1a    | 113868 | acetyl-Coenzyme A acyltransferase 1A                       | 1.34 | 1.63 | 0.86 |
| A_51_P381150 | NM_199299 | Phf15     | 76901  | PHD finger protein 15                                      | 1.40 | 1.63 | 0.67 |
| A_51_P378531 | NA        | NA        | NA     | NA                                                         | 1.48 | 1.63 | 0.46 |
|              |           |           |        | PRP40 pre-mRNA processing factor 40 homolog A              |      |      |      |
| A_52_P158576 | NM_018785 | Prpf40a   | 56194  | (yeast)                                                    | 1.46 | 1.63 | 0.50 |
| A_52_P168962 | NM_007646 | Cd38      | 12494  | CD38 antigen                                               | 1.32 | 1.63 | 0.97 |
| A_51_P276404 | NM_009408 | Top1      | 21969  | topoisomerase (DNA) I                                      | 1.77 | 1.63 | 0.13 |
| A_52_P243599 | NM_019657 | Hsd17b12  | 56348  | hydroxysteroid (17-beta) dehydrogenase 12                  | 1.65 | 1.63 | 0.20 |
| A_51_P201445 | NA        | NA        | NA     | NA                                                         | 1.32 | 1.63 | 0.91 |
| A_52_P643812 | NA        | NA        | NA     | NA                                                         | 1.72 | 1.63 | 0.15 |
| A_51_P496491 | NM_028031 | Zdhhc13   | 243983 | zinc finger, DHHC domain containing 13                     | 1.61 | 1.63 | 0.24 |
| A_52_P171160 | NM_177281 | D930030D  | 320874 | RIKEN cDNA D930030D11 gene                                 | 1.30 | 1.63 | 0.97 |
| A_52_P266899 | BC059244  | Exoc6b    | 75914  | exocyst complex component 6B                               | 1.31 | 1.63 | 0.97 |
| A_52_P577386 | NM_010531 | Il18bp    | 16068  | interleukin 18 binding protein                             | 1.39 | 1.63 | 0.70 |
|              |           |           |        | ATPase, aminophospholipid transporter (APLT), class I,     |      |      |      |
| A_52_P385896 | NM_001038 | Atp8a1    | 11980  | type 8A, member 1                                          | 1.35 | 1.63 | 0.82 |
| A_51_P404779 | NM_001033 | Zfp217    | 228913 | zinc finger protein 217                                    | 1.64 | 1.63 | 0.21 |
| A_52_P178904 | NM_028112 | Seh1l     | 72124  | SEH1-like ( <i>S. cerevisiae</i>                           | 1.52 | 1.63 | 0.37 |
|              |           |           |        | serine (or cysteine) peptidase inhibitor, clade A (alpha-1 |      |      |      |
| A_51_P472033 | AK050552  | Serpina10 | 217847 | antiproteinase, antitrypsin), member 10                    | 1.31 | 1.63 | 0.97 |
| A_52_P403827 | NM_172829 | St6gal2   | 240119 | beta galactoside alpha 2,6 sialyltransferase 2             | 1.51 | 1.63 | 0.40 |
| A_52_P630493 | NM_001037 | Dnajb6    | 23950  | Dnaj (Hsp40) homolog, subfamily B, member 6                | 1.54 | 1.63 | 0.34 |
|              |           |           |        | WAS protein homolog associated with actin, golgi           |      |      |      |
| A_52_P383378 | NM_001004 | Whamm     | 434204 | membranes and microtubules                                 | 1.61 | 1.63 | 0.24 |
| A_52_P324566 | NM_021565 | Midn      | 59090  | midnolin                                                   | 1.37 | 1.63 | 0.77 |
| A_51_P520980 | NM_028881 | Crtc2     | 74343  | CREB regulated transcription coactivator 2                 | 1.33 | 1.63 | 0.91 |
| A_52_P614157 | NA        | NA        | NA     | NA                                                         | 1.32 | 1.63 | 0.91 |
| A_51_P469902 | XM_977926 | NA        | NA     | NA                                                         | 1.59 | 1.62 | 0.27 |
| A_52_P635776 | NM_019693 | Bat1a     | 53817  | HLA-B-associated transcript 1A                             | 1.52 | 1.62 | 0.37 |

|               |           |            |        |                                                                              |      |      |      |
|---------------|-----------|------------|--------|------------------------------------------------------------------------------|------|------|------|
| A_51_P113784  | NM_134129 | Prpf19     | 28000  | PRP19/PSO4 pre-mRNA processing factor 19 homolog<br>( <i>S. cerevisiae</i> ) | 1.38 | 1.62 | 0.70 |
| A_52_P496142  | NM_009932 | Col4a2     | 12827  | collagen, type IV, alpha 2                                                   | 1.60 | 1.62 | 0.27 |
| A_52_P1075615 | AK079772  | D18Ertd23  | 52492  | DNA segment, Chr 18, ERATO Doi 232, expressed                                | 1.29 | 1.62 | 1.04 |
| A_52_P548202  | AK086953  | Gm10030    | 791282 | predicted gene 10030                                                         | 1.60 | 1.62 | 0.27 |
| A_51_P417025  | NM_013837 | Tpst1      | 22021  | protein-tyrosine sulfotransferase 1                                          | 1.50 | 1.62 | 0.44 |
| A_52_P555672  | NM_001029 | Vrk1       | 22367  | vaccinia related kinase 1                                                    | 1.57 | 1.62 | 0.30 |
| A_51_P239838  | NA        | NA         | NA     | NA                                                                           | 1.31 | 1.62 | 0.97 |
| A_52_P99622   | NM_145630 | Pdk3       | 236900 | pyruvate dehydrogenase kinase, isoenzyme 3                                   | 1.34 | 1.62 | 0.86 |
| A_51_P220896  | NM_026879 | Chmp2b     | 68942  | chromatin modifying protein 2B                                               | 1.30 | 1.62 | 1.04 |
| A_52_P628060  | NM_054043 | Msi2       | 76626  | Musashi homolog 2 ( <i>Drosophila</i> )                                      | 1.49 | 1.62 | 0.44 |
| A_51_P479758  | NM_009239 | Sp4        | 20688  | trans-acting transcription factor 4                                          | 1.29 | 1.62 | 1.04 |
| A_51_P153113  | AK005653  | 1700003O08 | 75654  | RIKEN cDNA 1700003O08 gene                                                   | 1.48 | 1.62 | 0.46 |
| A_52_P563908  | AK038396  | Prox1      | 19130  | prospero-related homeobox 1                                                  | 1.40 | 1.62 | 0.67 |
| A_52_P380502  | NM_201385 | Plec       | 18810  | plectin                                                                      | 1.62 | 1.62 | 0.22 |
| A_52_P640386  | NM_133857 | Usp53      | 99526  | ubiquitin specific peptidase 53                                              | 1.48 | 1.62 | 0.46 |
| A_52_P45708   | NM_016686 | Vezf1      | 22344  | vascular endothelial zinc finger 1                                           | 1.68 | 1.61 | 0.18 |
| A_51_P491987  | NM_019955 | Ripk3      | 56532  | receptor-interacting serine-threonine kinase 3                               | 1.34 | 1.61 | 0.86 |
| A_52_P633597  | NM_181397 | Rftn1      | 76438  | raftlin lipid raft linker 1                                                  | 1.52 | 1.61 | 0.37 |
| A_51_P271614  | NM_145629 | Pls3       | 102866 | plastin 3 (T-isoform)                                                        | 1.58 | 1.61 | 0.28 |
| A_51_P390522  | NM_133724 | Cno        | 117197 | cappuccino                                                                   | 1.47 | 1.61 | 0.50 |
| A_51_P457706  | NM_175667 | Ankrd5     | 319196 | ankyrin repeat domain 5                                                      | 1.35 | 1.61 | 0.82 |
| A_51_P437176  | NM_172570 | Trim47     | 217333 | tripartite motif-containing 47                                               | 1.57 | 1.61 | 0.30 |
| A_52_P676913  | NM_010817 | Psmd7      | 17463  | proteasome (prosome, macropain) 26S subunit, non-ATPase, 7                   | 1.54 | 1.61 | 0.34 |
| A_52_P295533  | NM_145156 | Slc25a28   | 246696 | solute carrier family 25, member 28                                          | 1.59 | 1.61 | 0.27 |
| A_51_P233982  | NM_177089 | Tacc1      | 320165 | transforming, acidic coiled-coil containing protein 1                        | 1.43 | 1.61 | 0.58 |
| A_51_P102339  | NM_001029 | Vrk1       | 22367  | vaccinia related kinase 1                                                    | 1.31 | 1.61 | 0.97 |
| A_52_P586671  | NM_172518 | Fbxo42     | 213499 | F-box protein 42                                                             | 1.71 | 1.61 | 0.16 |
| A_52_P398432  | NM_016918 | Nudt5      | 53893  | nudix (nucleoside diphosphate linked moiety X)-type motif 5                  | 1.40 | 1.61 | 0.67 |
| A_52_P6798    | NM_025776 | Rbm22      | 66810  | RNA binding motif protein 22                                                 | 1.30 | 1.61 | 1.04 |

|               |           |            |        |                                                                                              |      |      |      |
|---------------|-----------|------------|--------|----------------------------------------------------------------------------------------------|------|------|------|
| A_52_P580608  | NM_148927 | Plekha4    | 69217  | pleckstrin homology domain containing, family A (phosphoinositide binding specific) member 4 | 1.57 | 1.61 | 0.30 |
| A_52_P220190  | NM_031179 | Sf3b1      | 81898  | splicing factor 3b, subunit 1                                                                | 1.72 | 1.61 | 0.15 |
| A_52_P133594  | NM_009778 | C3         | 12266  | complement component 3                                                                       | 1.49 | 1.61 | 0.46 |
| A_52_P499711  | NM_028099 | Dusp11     | 72102  | dual specificity phosphatase 11 (RNA/RNP complex 1-interacting)                              | 1.39 | 1.61 | 0.70 |
| A_51_P466886  | NM_019708 | Scoc       | 56367  | short coiled-coil protein                                                                    | 1.37 | 1.61 | 0.77 |
| A_51_P270904  | NM_172641 | 9930023K0  | 226245 | RIKEN cDNA 9930023K05 gene                                                                   | 1.40 | 1.60 | 0.67 |
| A_52_P296095  | AK078614  | Ptprk      | 19272  | protein tyrosine phosphatase, receptor type, K                                               | 1.79 | 1.60 | 0.11 |
| A_51_P129012  | NM_009735 | B2m        | 12010  | beta-2 microglobulin                                                                         | 1.31 | 1.60 | 0.97 |
| A_51_P456248  | NM_173449 | 4921523A11 | 110332 | RIKEN cDNA 4921523A10 gene                                                                   | 1.39 | 1.60 | 0.67 |
| A_51_P502608  | NM_133784 | Wwtr1      | 97064  | WW domain containing transcription regulator 1                                               | 1.50 | 1.60 | 0.44 |
| A_52_P653276  | NM_007615 | Ctnnd1     | 12388  | catenin (cadherin associated protein), delta 1                                               | 1.52 | 1.60 | 0.37 |
| A_52_P168319  | NM_177321 | Mia2       | 338320 | melanoma inhibitory activity 2                                                               | 1.40 | 1.60 | 0.67 |
| A_52_P217172  | AK132230  | Esf1       | 66580  | ESF1, nucleolar pre-rRNA processing protein, homolog (S. cerevisiae)                         | 1.30 | 1.60 | 0.97 |
| A_52_P1155474 | NM_027927 | Ints12     | 71793  | integrator complex subunit 12                                                                | 1.43 | 1.60 | 0.58 |
| A_51_P336385  | NM_175551 | Dido1      | 23856  | death inducer-obliterator 1                                                                  | 1.52 | 1.60 | 0.40 |
| A_52_P249826  | NM_020259 | Hhip       | 15245  | Hedgehog-interacting protein                                                                 | 1.35 | 1.60 | 0.82 |
| A_52_P598259  | NM_001003 | Rab3ip     | 216363 | RAB3A interacting protein                                                                    | 1.50 | 1.60 | 0.44 |
| A_51_P443364  | NM_134048 | Cbll1      | 104836 | Casitas B-lineage lymphoma-like 1                                                            | 1.45 | 1.60 | 0.55 |
| A_52_P193301  | NM_025519 | Chmp4c     | 66371  | chromatin modifying protein 4C                                                               | 1.50 | 1.60 | 0.44 |
| A_52_P668984  | XM_001003 | NA         | NA     | NA                                                                                           | 1.35 | 1.60 | 0.82 |
| A_51_P436796  | NM_016784 | Plrg1      | 53317  | pleiotropic regulator 1, PRL1 homolog (Arabidopsis)                                          | 1.30 | 1.60 | 1.04 |
| A_51_P330630  | NM_144937 | Usp3       | 235441 | ubiquitin specific peptidase 3                                                               | 1.50 | 1.60 | 0.44 |
| A_51_P129006  | NM_009735 | B2m        | 12010  | beta-2 microglobulin                                                                         | 1.29 | 1.60 | 1.04 |
| A_51_P259181  | NM_026849 | Mtmr14     | 97287  | myotubularin related protein 14                                                              | 1.35 | 1.60 | 0.82 |
| A_51_P290074  | NM_021272 | Fabp7      | 12140  | fatty acid binding protein 7, brain                                                          | 1.39 | 1.60 | 0.70 |
| A_52_P260114  | NM_007611 | Casp7      | 12369  | caspase 7                                                                                    | 1.30 | 1.60 | 1.04 |
| A_52_P289256  | XM_139711 | Arid1b     | 239985 | AT rich interactive domain 1B (SWI-like)                                                     | 1.42 | 1.60 | 0.61 |
| A_51_P184928  | NM_028968 | Ifitm7     | 74482  | interferon induced transmembrane protein 7                                                   | 1.34 | 1.60 | 0.86 |
| A_52_P361993  | NM_173181 | Fam164a    | 67306  | family with sequence similarity 164, member A                                                | 1.58 | 1.59 | 0.28 |
| A_51_P270206  | NM_029852 | Ccdc41     | 77048  | coiled-coil domain containing 41                                                             | 1.44 | 1.59 | 0.55 |

|              |           |            |        |                                                                      |      |      |      |
|--------------|-----------|------------|--------|----------------------------------------------------------------------|------|------|------|
| A_52_P229709 | NM_025356 | Ube2d3     | 66105  | ubiquitin-conjugating enzyme E2D 3 (UBC4/5 homolog, yeast)           | 1.34 | 1.59 | 0.86 |
| A_52_P349521 | AK047447  | NA         | NA     | NA                                                                   | 1.33 | 1.59 | 0.91 |
| A_52_P82722  | NM_009988 | Cxadr      | 13052  | coxsackie virus and adenovirus receptor                              | 1.35 | 1.59 | 0.82 |
| A_52_P84302  | AK132230  | Esf1       | 66580  | ESF1, nucleolar pre-rRNA processing protein, homolog (S. cerevisiae) | 1.37 | 1.59 | 0.77 |
| A_51_P179131 | AK157021  | Vasp       | 22323  | vasodilator-stimulated phosphoprotein                                | 1.36 | 1.59 | 0.77 |
| A_52_P207278 | NM_011962 | Plod3      | 26433  | procollagen-lysine, 2-oxoglutarate 5-dioxygenase 3                   | 1.47 | 1.59 | 0.50 |
| A_51_P211131 | NM_134000 | Traf3ip2   | 103213 | TRAF3 interacting protein 2                                          | 1.41 | 1.59 | 0.61 |
| A_51_P451335 | NM_008867 | Pla2r1     | 18779  | phospholipase A2 receptor 1                                          | 1.31 | 1.59 | 0.97 |
| A_51_P473498 | NM_173398 | Gpr171     | 229323 | G protein-coupled receptor 171                                       | 1.35 | 1.59 | 0.82 |
| A_52_P337821 | AK139584  | Eif1a      | 13664  | eukaryotic translation initiation factor 1A                          | 1.38 | 1.59 | 0.70 |
| A_52_P471967 | NM_178726 | Ppm1l      | 242083 | protein phosphatase 1 (formerly 2C)-like                             | 1.35 | 1.59 | 0.82 |
| A_51_P510466 | NM_019788 | Pldn       | 18457  | pallidin                                                             | 1.33 | 1.59 | 0.91 |
| A_51_P419246 | AK158034  | 5830416P1  | 381232 | RIKEN cDNA 5830416P10 gene                                           | 1.54 | 1.59 | 0.34 |
| A_51_P207693 | NM_172737 | Shisa7     | 232813 | shisa homolog 7 (Xenopus laevis)                                     | 1.60 | 1.59 | 0.27 |
| A_51_P186281 | NM_008000 | Fert2      | 14158  | fer (fms/fps related) protein kinase, testis specific 2              | 1.50 | 1.58 | 0.44 |
| A_51_P412955 | AK044842  | Plcb4      | 18798  | phospholipase C, beta 4                                              | 1.38 | 1.58 | 0.70 |
| A_51_P138450 | NM_008122 | Gjc1       | 14615  | gap junction protein, gamma 1                                        | 1.36 | 1.58 | 0.77 |
| A_52_P505413 | NM_023663 | Ripk4      | 72388  | receptor-interacting serine-threonine kinase 4                       | 1.35 | 1.58 | 0.82 |
| A_51_P350073 | NM_023668 | Ndel1      | 83431  | nuclear distribution gene E-like homolog 1 (A. nidulans)             | 1.58 | 1.58 | 0.28 |
| A_51_P210611 | NM_133718 | Tmem30a    | 69981  | transmembrane protein 30A                                            | 1.30 | 1.58 | 0.97 |
| A_52_P365434 | BC051182  | D5Ertd579c | 320661 | DNA segment, Chr 5, ERATO Doi 579, expressed                         | 1.51 | 1.58 | 0.40 |
| A_51_P320888 | NM_001033 | Cln5       | 211286 | ceroid-lipofuscinosis, neuronal 5                                    | 1.61 | 1.58 | 0.24 |
| A_52_P450236 | NM_172713 | Sdad1      | 231452 | SDA1 domain containing 1                                             | 1.40 | 1.58 | 0.67 |
| A_52_P734595 | NM_009615 | Adam17     | 11491  | a disintegrin and metallopeptidase domain 17                         | 1.37 | 1.58 | 0.77 |
| A_52_P134639 | NM_009444 | Tgoln2     | 22135  | trans-golgi network protein 2                                        | 1.48 | 1.58 | 0.46 |
| A_51_P110529 | NM_008882 | Plxna2     | 18845  | plexin A2                                                            | 1.42 | 1.58 | 0.58 |
| A_51_P161086 | NM_008908 | Ppic       | 19038  | peptidylprolyl isomerase C                                           | 1.36 | 1.58 | 0.77 |
| A_51_P397003 | XM_133990 | NA         | NA     | NA                                                                   | 1.37 | 1.58 | 0.77 |
| A_52_P132055 | NM_021293 | Cd33       | 12489  | CD33 antigen                                                         | 1.31 | 1.58 | 0.97 |

|               |            |                 |        |                                                                                                                               |      |      |      |
|---------------|------------|-----------------|--------|-------------------------------------------------------------------------------------------------------------------------------|------|------|------|
| A_52_P177685  | NM_018821  | Socs6           | 54607  | suppressor of cytokine signaling 6                                                                                            | 1.39 | 1.58 | 0.67 |
| A_51_P221109  | AI835779   | NA              | NA     | NA                                                                                                                            | 1.34 | 1.58 | 0.86 |
| A_51_P117439  | NM_011847  | Dnajb6          | 23950  | Dnaj (Hsp40) homolog, subfamily B, member 6                                                                                   | 1.45 | 1.57 | 0.53 |
| A_51_P404815  | AK010208   | Apol6           | 71939  | apolipoprotein L 6                                                                                                            | 1.61 | 1.57 | 0.24 |
| A_52_P165575  | NM_146622  | Olfir360        | 258615 | olfactory receptor 360                                                                                                        | 1.48 | 1.57 | 0.46 |
| A_51_P489192  | NM_015784  | Postn           | 50706  | periostin, osteoblast specific factor                                                                                         | 1.29 | 1.57 | 1.04 |
| A_52_P1093503 | NM_206973  | Gpr152          | 269053 | G protein-coupled receptor 152                                                                                                | 1.42 | 1.57 | 0.61 |
| A_51_P500713  | NM_007832  | Dck             | 13178  | deoxycytidine kinase                                                                                                          | 1.45 | 1.57 | 0.53 |
| A_51_P376623  | XM_0010011 | Trip11          | 109181 | thyroid hormone receptor interactor 11                                                                                        | 1.45 | 1.57 | 0.53 |
| A_51_P369636  | NM_026115  | Hat1            | 107435 | histone aminotransferase 1                                                                                                    | 1.44 | 1.57 | 0.55 |
| A_52_P170339  | NM_010898  | Nf2             | 18016  | neurofibromatosis 2                                                                                                           | 1.45 | 1.57 | 0.55 |
| A_52_P679273  | AK036632   | 2310001H176432  |        | RIKEN cDNA 2310001H17 gene                                                                                                    | 1.53 | 1.57 | 0.37 |
| A_52_P109010  | XM_0010014 | NA              | NA     | NA                                                                                                                            | 1.67 | 1.57 | 0.20 |
| A_51_P187491  | NM_053087  | Epgn            | 71920  | epithelial mitogen                                                                                                            | 1.54 | 1.57 | 0.34 |
| A_51_P148355  | NM_175433  | Zfp710          | 209225 | zinc finger protein 710                                                                                                       | 1.74 | 1.57 | 0.15 |
| A_52_P662695  | NM_025507  | Snw1            | 66354  | SNW domain containing 1                                                                                                       | 1.65 | 1.57 | 0.20 |
| A_51_P204486  | NM_028807  | 1200009I0674190 |        | RIKEN cDNA 1200009I06 gene                                                                                                    | 1.30 | 1.57 | 1.04 |
| A_52_P601055  | AK129139   | Mtss1           | 211401 | metastasis suppressor 1                                                                                                       | 1.40 | 1.57 | 0.67 |
| A_52_P190286  | XM_0010062 | NA              | NA     | NA                                                                                                                            | 1.50 | 1.57 | 0.44 |
| A_52_P477649  | AK158055   | 1810058I267705  |        | RIKEN cDNA 1810058I24 gene                                                                                                    | 1.45 | 1.57 | 0.53 |
| A_52_P406216  | NA         | NA              | NA     | NA                                                                                                                            | 1.54 | 1.57 | 0.34 |
| A_51_P122521  | NM_016714  | Nup50           | 18141  | nucleoporin 50                                                                                                                | 1.40 | 1.57 | 0.67 |
| A_51_P516097  | AK147204   | Cyld            | 74256  | cylindromatosis (turban tumor syndrome)                                                                                       | 1.46 | 1.57 | 0.53 |
| A_51_P277389  | NM_020494  | Ddx24           | 27225  | DEAD (Asp-Glu-Ala-Asp) box polypeptide 24                                                                                     | 1.64 | 1.57 | 0.21 |
| A_51_P512061  | BC085280   | 1600015I1069761 |        | RIKEN cDNA 1600015I10 gene                                                                                                    | 1.51 | 1.57 | 0.40 |
| A_51_P474454  | NM_026001  | Rnaseh2b        | 67153  | ribonuclease H2, subunit B                                                                                                    | 1.52 | 1.57 | 0.37 |
| A_51_P376883  | NM_029601  | 1700019E176411  |        | RIKEN cDNA 1700019E19 gene                                                                                                    | 1.31 | 1.57 | 0.97 |
| A_51_P194070  | NM_013626  | Pam             | 18484  | peptidylglycine alpha-amidating monooxygenase<br>TAF5 RNA polymerase II, TATA box binding protein (TBP)-<br>associated factor | 1.34 | 1.56 | 0.86 |
| A_52_P272915  | NM_177342  | Taf5            | 226182 |                                                                                                                               | 1.33 | 1.56 | 0.91 |
| A_52_P445622  | NM_025921  | 2610002M067028  |        | RIKEN cDNA 2610002M06 gene                                                                                                    | 1.41 | 1.56 | 0.61 |
| A_52_P298053  | AK038653   | NA              | NA     | NA                                                                                                                            | 1.32 | 1.56 | 0.91 |
| A_51_P486479  | NM_024456  | Rab5c           | 19345  | RAB5C, member RAS oncogene family                                                                                             | 1.32 | 1.56 | 0.91 |

|              |           |           |        |                                                                            |      |      |      |
|--------------|-----------|-----------|--------|----------------------------------------------------------------------------|------|------|------|
| A_51_P133936 | NM_013598 | Kitl      | 17311  | kit ligand                                                                 | 1.55 | 1.56 | 0.33 |
| A_51_P138939 | NM_028783 | Robo4     | 74144  | roundabout homolog 4 (Drosophila)                                          | 1.41 | 1.56 | 0.67 |
| A_51_P356762 | NM_008565 | Mcm4      | 17217  | minichromosome maintenance deficient 4 homolog (S. cerevisiae)             | 1.35 | 1.56 | 0.82 |
| A_51_P432403 | NM_010207 | Fgfr2     | 14183  | fibroblast growth factor receptor 2                                        | 1.47 | 1.56 | 0.50 |
| A_52_P309418 | BC056481  | NA        | NA     | NA                                                                         | 1.53 | 1.56 | 0.37 |
| A_51_P384967 | M29244    | NA        | NA     | NA                                                                         | 1.51 | 1.56 | 0.40 |
| A_51_P132625 | NM_053262 | Hsd17b11  | 114664 | hydroxysteroid (17-beta) dehydrogenase 11                                  | 1.49 | 1.56 | 0.46 |
| A_51_P406315 | NM_009962 | Gpr44     | 14764  | G protein-coupled receptor 44                                              | 1.53 | 1.56 | 0.37 |
| A_52_P490770 | AK141740  | Zfp26     | 22688  | zinc finger protein 26                                                     | 1.59 | 1.56 | 0.28 |
| A_52_P370560 | NM_011690 | Vars      | 22321  | valyl-tRNA synthetase                                                      | 1.67 | 1.56 | 0.20 |
| A_51_P249494 | NM_016807 | Sdcbp     | 53378  | syndecan binding protein non imprinted in Prader-Willi/Angelman syndrome 2 | 1.44 | 1.56 | 0.55 |
| A_51_P197354 | NM_023647 | Nipa2     | 93790  | homolog (human)                                                            | 1.42 | 1.56 | 0.58 |
| A_52_P537941 | NM_080857 | Asb13     | 142688 | ankyrin repeat and SOCS box-containing 13                                  | 1.57 | 1.55 | 0.30 |
| A_52_P3276   | NM_027519 | 633040611 | 70717  | RIKEN cDNA 6330406115 gene                                                 | 1.62 | 1.55 | 0.24 |
| A_52_P615274 | NM_026001 | Rnaseh2b  | 67153  | ribonuclease H2, subunit B                                                 | 1.48 | 1.55 | 0.46 |
| A_51_P513959 | NA        | NA        | NA     | NA                                                                         | 1.51 | 1.55 | 0.40 |
| A_52_P107234 | NM_177806 | Prpf39    | 328110 | PRP39 pre-mRNA processing factor 39 homolog (yeast)                        | 1.48 | 1.55 | 0.46 |
| A_51_P473043 | NM_025800 | Ppp1r2    | 66849  | protein phosphatase 1, regulatory (inhibitor) subunit 2                    | 1.48 | 1.55 | 0.46 |
| A_52_P600038 | NM_146128 | Dlgap4    | 228836 | discs, large homolog-associated protein 4 (Drosophila)                     | 1.56 | 1.55 | 0.30 |
| A_51_P281078 | NA        | NA        | NA     | NA                                                                         | 1.45 | 1.55 | 0.53 |
| A_52_P245911 | NA        | NA        | NA     | NA                                                                         | 1.30 | 1.55 | 0.97 |
| A_52_P558713 | AK050582  | Mat2a     | 232087 | methionine adenosyltransferase II, alpha                                   | 1.51 | 1.55 | 0.40 |
| A_51_P520794 | NM_170591 | Nupl1     | 71844  | nucleoporin like 1                                                         | 1.46 | 1.55 | 0.53 |
| A_51_P262701 | NM_019775 | Cpb2      | 56373  | carboxypeptidase B2 (plasma)                                               | 1.38 | 1.55 | 0.70 |
| A_51_P469008 | NM_010119 | Ehd1      | 13660  | EH-domain containing 1                                                     | 1.36 | 1.55 | 0.77 |
| A_52_P474002 | NM_178357 | Klf11     | 194655 | Kruppel-like factor 11                                                     | 1.46 | 1.55 | 0.53 |
| A_52_P244030 | AK034874  | Zfp516    | 329003 | zinc finger protein 516                                                    | 1.54 | 1.55 | 0.34 |
| A_51_P343429 | NM_026331 | Slc25a37  | 67712  | solute carrier family 25, member 37                                        | 1.40 | 1.55 | 0.67 |
| A_51_P489289 | BC094937  | Rhoh      | 74734  | ras homolog gene family, member H                                          | 1.38 | 1.55 | 0.70 |



|              |           |           |        |                                                                          |      |      |      |
|--------------|-----------|-----------|--------|--------------------------------------------------------------------------|------|------|------|
| A_52_P598128 | NM_018886 | Lgals8    | 56048  | lectin, galactose binding, soluble 8                                     | 1.50 | 1.55 | 0.44 |
| A_51_P263220 | NM_177342 | Taf5      | 226182 | TAF5 RNA polymerase II, TATA box binding protein (TBP)-associated factor | 1.36 | 1.55 | 0.77 |
| A_52_P288750 | NM_001025 | Gm527     | 217648 | predicted gene 527                                                       | 1.35 | 1.55 | 0.82 |
| A_51_P274436 | NM_011485 | Star      | 20845  | steroidogenic acute regulatory protein                                   | 1.44 | 1.55 | 0.55 |
| A_51_P177819 | NM_030743 | Rnf114    | 81018  | ring finger protein 114                                                  | 1.70 | 1.55 | 0.16 |
| A_52_P537140 | AK047235  | Zdhhc24   | 70605  | zinc finger, DHHC domain containing 24                                   | 1.45 | 1.55 | 0.53 |
| A_52_P471583 | NM_199068 | Foxk1     | 17425  | forkhead box K1                                                          | 1.67 | 1.55 | 0.18 |
| A_52_P395397 | NM_146217 | Aars      | 234734 | alanyl-tRNA synthetase                                                   | 1.43 | 1.55 | 0.58 |
| A_51_P233059 | NM_008477 | Ktn1      | 16709  | kinectin 1                                                               | 1.39 | 1.55 | 0.70 |
| A_51_P214859 | NM_133915 | Pxn       | 19303  | paxillin                                                                 | 1.36 | 1.55 | 0.82 |
| A_52_P272534 | NA        | NA        | NA     | NA                                                                       | 1.42 | 1.55 | 0.61 |
| A_52_P337050 | NM_009615 | Adam17    | 11491  | a disintegrin and metallopeptidase domain 17                             | 1.42 | 1.55 | 0.61 |
| A_51_P479598 | NM_173863 | Crtc3     | 70461  | CREB regulated transcription coactivator 3                               | 1.41 | 1.54 | 0.61 |
| A_51_P175146 | NM_027769 | Cpne3     | 70568  | copine III                                                               | 1.40 | 1.54 | 0.67 |
| A_52_P301724 | AK164753  | Nab1      | 17936  | Ngfi-A binding protein 1                                                 | 1.36 | 1.54 | 0.82 |
| A_52_P117999 | NM_001040 | 2810407C0 | 69227  | RIKEN cDNA 2810407C02 gene                                               | 1.45 | 1.54 | 0.55 |
| A_52_P244162 | BC031445  | Golph3    | 66629  | golgi phosphoprotein 3                                                   | 1.45 | 1.54 | 0.53 |
| A_52_P305041 | NM_027045 | Gcap14    | 72972  | granule cell antiserum positive 14                                       | 1.32 | 1.54 | 0.91 |
| A_52_P661470 | NA        | NA        | NA     | NA                                                                       | 1.44 | 1.54 | 0.55 |
| A_52_P150525 | NA        | NA        | NA     | NA                                                                       | 1.32 | 1.53 | 0.91 |
| A_52_P558939 | NM_178690 | Rab3gap1  | 226407 | RAB3 GTPase activating protein subunit 1                                 | 1.38 | 1.53 | 0.70 |
| A_51_P461138 | NM_016861 | Pdlim1    | 54132  | PDZ and LIM domain 1 (elfin)                                             | 1.31 | 1.53 | 0.97 |
| A_52_P76829  | NM_010434 | Hipk3     | 15259  | homeodomain interacting protein kinase 3                                 | 1.43 | 1.53 | 0.58 |
| A_52_P491766 | NM_008136 | Gnal1     | 14670  | guanine nucleotide binding protein-like 1                                | 1.32 | 1.53 | 0.91 |
| A_52_P354744 | NM_011401 | Slc2a3    | 20527  | solute carrier family 2 (facilitated glucose transporter), member 3      | 1.43 | 1.53 | 0.58 |
| A_51_P308796 | NM_010235 | Fosl1     | 14283  | fos-like antigen 1                                                       | 1.55 | 1.53 | 0.33 |
| A_52_P43150  | NM_007519 | Baat      | 12012  | bile acid-Coenzyme A: amino acid N-acyltransferase                       | 1.32 | 1.53 | 0.91 |
| A_52_P655285 | AK046016  | Zfp462    | 242466 | zinc finger protein 462                                                  | 1.44 | 1.53 | 0.55 |
| A_52_P136275 | NM_054089 | Tgs1      | 116940 | trimethylguanosine synthase homolog (S. cerevisiae)                      | 1.32 | 1.53 | 0.97 |
| A_51_P154222 | NM_053092 | Kars      | 85305  | lysyl-tRNA synthetase                                                    | 1.31 | 1.53 | 0.97 |

|               |           |           |                                                     |                                                                                     |      |      |      |
|---------------|-----------|-----------|-----------------------------------------------------|-------------------------------------------------------------------------------------|------|------|------|
|               |           |           | regulator of chromosome condensation (RCC1) and BTB |                                                                                     |      |      |      |
| A_52_P444637  | NM_134083 | Rcbtb2    | 105670                                              | (POZ) domain containing protein 2                                                   | 1.32 | 1.53 | 0.91 |
| A_52_P436643  | NM_018830 | Asah2     | 54447                                               | N-acylsphingosine amidohydrolase 2                                                  | 1.47 | 1.53 | 0.50 |
| A_52_P545512  | AK086995  | NA        | NA                                                  | NA                                                                                  | 1.29 | 1.53 | 1.04 |
| A_52_P249424  | NM_001025 | Vegfa     | 22339                                               | vascular endothelial growth factor A                                                | 1.39 | 1.53 | 0.70 |
| A_52_P614629  | BC085235  | Hbs1l     | 56422                                               | Hbs1-like ( <i>S. cerevisiae</i> )<br>PRP40 pre-mRNA processing factor 40 homolog A | 1.40 | 1.53 | 0.67 |
| A_51_P193446  | NM_018785 | Prpf40a   | 56194                                               | (yeast)                                                                             | 1.46 | 1.52 | 0.53 |
| A_51_P363657  | NM_028800 | Stk40     | 74178                                               | serine/threonine kinase 40                                                          | 1.30 | 1.52 | 1.04 |
| A_51_P408881  | NM_019808 | Pdlim5    | 56376                                               | PDZ and LIM domain 5                                                                | 1.55 | 1.52 | 0.33 |
| A_51_P316575  | XM_127501 | NA        | NA                                                  | NA                                                                                  | 1.36 | 1.52 | 0.77 |
| A_52_P650540  | NM_145827 | Nlrp3     | 216799                                              | NLR family, pyrin domain containing 3                                               | 1.46 | 1.52 | 0.53 |
| A_51_P354698  | NM_030238 | Dync1h1   | 13424                                               | dynein cytoplasmic 1 heavy chain 1                                                  | 1.49 | 1.52 | 0.44 |
| A_51_P136277  | NM_027874 | Csnk1d    | 104318                                              | casein kinase 1, delta                                                              | 1.41 | 1.52 | 0.61 |
| A_51_P451606  | NM_011448 | Sox9      | 20682                                               | SRY-box containing gene 9                                                           | 1.37 | 1.52 | 0.77 |
| A_52_P23212   | NM_009637 | Aebp2     | 11569                                               | AE binding protein 2                                                                | 1.32 | 1.52 | 0.91 |
| A_51_P380881  | NM_033609 | Med15     | 94112                                               | mediator complex subunit 15                                                         | 1.35 | 1.52 | 0.82 |
| A_51_P222153  | NM_009419 | Tpst2     | 22022                                               | protein-tyrosine sulfotransferase 2                                                 | 1.56 | 1.52 | 0.30 |
| A_52_P604849  | NM_013884 | Cspg5     | 29873                                               | chondroitin sulfate proteoglycan 5                                                  | 1.43 | 1.52 | 0.58 |
| A_52_P43848   | NM_001040 | Sco1      | 52892                                               | SCO cytochrome oxidase deficient homolog 1 (yeast)                                  | 1.32 | 1.52 | 0.91 |
| A_52_P138806  | NM_198618 | Dlgap3    | 242667                                              | discs, large ( <i>Drosophila</i> ) homolog-associated protein 3                     | 1.32 | 1.52 | 0.91 |
| A_51_P389929  | NM_008693 | Klk1b3    | 18050                                               | kallikrein 1-related peptidase b3                                                   | 1.36 | 1.52 | 0.77 |
| A_51_P442788  | NM_080419 | Igsf8     | 140559                                              | immunoglobulin superfamily, member 8                                                | 1.34 | 1.52 | 0.86 |
| A_52_P344978  | XR_003344 | NA        | NA                                                  | NA                                                                                  | 1.29 | 1.52 | 1.04 |
| A_51_P126835  | NM_001025 | 2700007P2 | 212772                                              | RIKEN cDNA 2700007P21 gene                                                          | 1.49 | 1.52 | 0.46 |
| A_52_P499206  | NM_013763 | Tbl2      | 27368                                               | transducin (beta)-like 2                                                            | 1.43 | 1.52 | 0.58 |
| A_52_P1116825 | BU519104  | NA        | NA                                                  | NA                                                                                  | 1.39 | 1.51 | 0.70 |
| A_51_P488730  | NM_175480 | Zfp612    | 234725                                              | zinc finger protein 612<br>par-6 partitioning defective 6 homolog gamma ( <i>C.</i> | 1.29 | 1.51 | 1.04 |
| A_51_P425657  | NM_053117 | Pard6g    | 93737                                               | <i>elegans</i> )                                                                    | 1.36 | 1.51 | 0.77 |
| A_51_P163079  | NM_133735 | Ptcd1     | 71799                                               | pentatricopeptide repeat domain 1                                                   | 1.51 | 1.51 | 0.40 |
| A_51_P456499  | NM_029422 | Tm7sf4    | 75766                                               | transmembrane 7 superfamily member 4                                                | 1.32 | 1.51 | 0.91 |

|              |           |                 |        |                                                                            |      |      |      |
|--------------|-----------|-----------------|--------|----------------------------------------------------------------------------|------|------|------|
| A_51_P369106 | NM_024436 | Rab22a          | 19334  | RAB22A, member RAS oncogene family                                         | 1.38 | 1.51 | 0.70 |
| A_51_P265137 | NM_013685 | Tcf4            | 21413  | transcription factor 4                                                     | 1.55 | 1.51 | 0.33 |
| A_51_P276652 | NM_029397 | Rbm12           | 75710  | RNA binding motif protein 12                                               | 1.34 | 1.50 | 0.86 |
| A_52_P335609 | NM_198004 | 5133401N09      | 75731  | RIKEN cDNA 5133401N09 gene                                                 | 1.42 | 1.50 | 0.61 |
| A_51_P320539 | NM_001013 | Fam105b         | 432940 | family with sequence similarity 105, member B                              | 1.42 | 1.50 | 0.61 |
| A_52_P492856 | NM_175836 | Spnb2           | 20742  | spectrin beta 2                                                            | 1.31 | 1.50 | 0.97 |
| A_51_P106868 | NM_013901 | Slc39a1         | 30791  | solute carrier family 39 (zinc transporter), member 1                      | 1.31 | 1.50 | 0.97 |
| A_52_P658644 | NM_173753 | Fnip1           | 216742 | folliculin interacting protein 1                                           | 1.32 | 1.50 | 0.97 |
| A_51_P150302 | NM_019465 | Crtam           | 54698  | cytotoxic and regulatory T cell molecule                                   | 1.40 | 1.50 | 0.67 |
| A_51_P115085 | NM_175749 | Nup153          | 218210 | nucleoporin 153                                                            | 1.47 | 1.50 | 0.50 |
| A_52_P339606 | NM_175833 | Cdv3            | 321022 | carnitine deficiency-associated gene expressed in ventricle 3              | 1.53 | 1.50 | 0.37 |
| A_51_P271725 | NM_028058 | Fundc1          | 72018  | FUN14 domain containing 1                                                  | 1.34 | 1.50 | 0.86 |
| A_52_P664467 | NM_148673 | Slu7            | 193116 | SLU7 splicing factor homolog ( <i>S. cerevisiae</i> )                      | 1.36 | 1.50 | 0.82 |
| A_51_P198410 | U07617    | Grb2            | 14784  | growth factor receptor bound protein 2                                     | 1.61 | 1.49 | 0.24 |
| A_52_P659258 | BC023841  | Ppat            | 231327 | phosphoribosyl pyrophosphate amidotransferase                              | 1.32 | 1.49 | 0.91 |
| A_51_P308681 | AK018089  | Ccdc90a         | 76137  | coiled-coil domain containing 90A                                          | 1.37 | 1.49 | 0.77 |
| A_52_P450881 | NM_024196 | Tbc1d20         | 67231  | TBC1 domain family, member 20                                              | 1.31 | 1.49 | 0.97 |
| A_52_P71869  | NM_201389 | Plec            | 18810  | plectin                                                                    | 1.56 | 1.49 | 0.30 |
| A_52_P421005 | AK028828  | Taf2            | 319944 | TAF2 RNA polymerase II, TATA box binding protein (TBP)-associated factor   | 1.43 | 1.48 | 0.58 |
| A_52_P441417 | NA        | NA              | NA     | NA                                                                         | 1.34 | 1.48 | 0.86 |
| A_52_P659861 | NM_001025 | Bclaf1          | 72567  | BCL2-associated transcription factor 1                                     | 1.39 | 1.48 | 0.67 |
| A_52_P99430  | NM_028243 | Prcp            | 72461  | prolylcarboxypeptidase (angiotensinase C)                                  | 1.34 | 1.48 | 0.86 |
| A_51_P493117 | NM_025807 | Slc16a9         | 66859  | solute carrier family 16 (monocarboxylic acid transporters), member 9      | 1.33 | 1.48 | 0.91 |
| A_52_P250517 | NM_011743 | Zfp106          | 20402  | zinc finger protein 106                                                    | 1.49 | 1.48 | 0.44 |
| A_52_P366772 | NM_173735 | 2310044G1217732 |        | RIKEN cDNA 2310044G17 gene                                                 | 1.37 | 1.48 | 0.77 |
| A_51_P442746 | AK033699  | Lgr4            | 107515 | leucine-rich repeat-containing G protein-coupled receptor 4                | 1.35 | 1.48 | 0.82 |
| A_52_P582969 | BC050841  | Nfkb1           | 18033  | nuclear factor of kappa light polypeptide gene enhancer in B-cells 1, p105 | 1.38 | 1.48 | 0.70 |

|              |           |           |        |                                                                   |      |      |      |
|--------------|-----------|-----------|--------|-------------------------------------------------------------------|------|------|------|
| A_52_P253015 | AK163954  | Erap1     | 80898  | endoplasmic reticulum aminopeptidase 1                            | 1.52 | 1.48 | 0.40 |
| A_51_P167237 | NM_009806 | Cask      | 12361  | calcium/calmodulin-dependent serine protein kinase (MAGUK family) | 1.41 | 1.48 | 0.61 |
| A_51_P358462 | NM_133689 | 4930579J0 | 67752  | RIKEN cDNA 4930579J09 gene                                        | 1.42 | 1.48 | 0.61 |
| A_52_P437363 | NM_027892 | Ppp1r12a  | 17931  | protein phosphatase 1, regulatory (inhibitor) subunit 12A         | 1.31 | 1.48 | 0.97 |
| A_52_P84315  | BC034239  | Chd7      | 320790 | chromodomain helicase DNA binding protein 7                       | 1.42 | 1.47 | 0.58 |
| A_52_P73703  | NM_153082 | Dnajc27   | 217378 | Dnaj (Hsp40) homolog, subfamily C, member 27                      | 1.46 | 1.47 | 0.50 |
| A_52_P394652 | NM_011445 | Sox6      | 20679  | SRY-box containing gene 6                                         | 1.39 | 1.47 | 0.70 |
| A_52_P139727 | NM_009716 | Atf4      | 11911  | activating transcription factor 4                                 | 1.33 | 1.47 | 0.86 |
| A_51_P207550 | NM_023196 | Pla2g12a  | 66350  | phospholipase A2, group XIIA                                      | 1.30 | 1.47 | 1.04 |
| A_52_P91329  | NM_025666 | Ubr7      | 66622  | ubiquitin protein ligase E3 component n-recognin 7 (putative)     | 1.36 | 1.47 | 0.82 |
| A_51_P132549 | NM_134125 | Trip10    | 106628 | thyroid hormone receptor interactor 10                            | 1.48 | 1.47 | 0.50 |
| A_52_P116372 | NM_133819 | Ppp1r15b  | 108954 | protein phosphatase 1, regulatory (inhibitor) subunit 15b         | 1.38 | 1.46 | 0.70 |
| A_51_P482552 | NM_001025 | Vegfa     | 22339  | vascular endothelial growth factor A                              | 1.38 | 1.46 | 0.70 |
| A_52_P85864  | NM_010579 | Eif6      | 16418  | eukaryotic translation initiation factor 6                        | 1.37 | 1.46 | 0.77 |
| A_51_P325592 | NM_025555 | 2410004B1 | 66421  | RIKEN cDNA 2410004B18 gene                                        | 1.34 | 1.46 | 0.86 |
| A_51_P380153 | BC057625  | Ubr4      | 69116  | ubiquitin protein ligase E3 component n-recognin 4                | 1.37 | 1.46 | 0.77 |
| A_52_P686344 | NM_001014 | Ttll4     | 67534  | tubulin tyrosine ligase-like family, member 4                     | 1.36 | 1.45 | 0.77 |
| A_52_P13568  | NM_026341 | Nudt13    | 67725  | nudix (nucleoside diphosphate linked moiety X)-type motif 13      | 1.44 | 1.45 | 0.55 |
| A_51_P361099 | NM_007422 | Adss      | 11566  | adenylosuccinate synthetase, non muscle                           | 1.38 | 1.45 | 0.70 |
| A_52_P422841 | NM_028872 | 5730559C1 | 67313  | RIKEN cDNA 5730559C18 gene                                        | 1.42 | 1.45 | 0.61 |
| A_52_P794346 | NA        | NA        | NA     | NA                                                                | 1.31 | 1.45 | 0.97 |
| A_52_P590192 | NM_177330 | Ghr       | 208188 | growth hormone secretagogue receptor                              | 1.49 | 1.45 | 0.44 |
| A_51_P100787 | AX775977  | Snw1      | 66354  | SNW domain containing 1                                           | 1.47 | 1.45 | 0.50 |
| A_52_P212887 | NM_182939 | Ppp4r2    | 232314 | protein phosphatase 4, regulatory subunit 2                       | 1.31 | 1.44 | 0.97 |
| A_51_P452003 | NM_027497 | Epc1      | 13831  | enhancer of polycomb homolog 1 (Drosophila)                       | 1.51 | 1.44 | 0.40 |
| A_52_P126146 | NM_024242 | Riok1     | 71340  | RIO kinase 1 (yeast)                                              | 1.34 | 1.44 | 0.86 |
| A_52_P569218 | NM_011682 | Utrn      | 22288  | utrophin                                                          | 1.38 | 1.43 | 0.70 |
| A_52_P427332 | NM_010166 | Eya3      | 14050  | eyes absent 3 homolog (Drosophila)                                | 1.32 | 1.43 | 0.91 |

|              |           |          |        |                                                             |       |      |      |
|--------------|-----------|----------|--------|-------------------------------------------------------------|-------|------|------|
| A_52_P931190 | XM_978218 | NA       | NA     | NA                                                          | 1.31  | 1.42 | 0.97 |
| A_52_P229471 | NA        | NA       | NA     | NA                                                          | 1.30  | 1.42 | 1.04 |
| A_52_P66313  | NM_212446 | Psmf1    | 228769 | proteasome (prosome, macropain) inhibitor subunit 1         | 1.29  | 1.42 | 1.04 |
| A_51_P385258 | AF197127  | Miox     | 56727  | myo-inositol oxygenase                                      | 1.34  | 1.42 | 0.86 |
| A_51_P357858 | NM_016676 | Rab10    | 19325  | RAB10, member RAS oncogene family                           | 1.30  | 1.40 | 1.04 |
| A_51_P241552 | NM_001039 | Wdr37    | 207615 | WD repeat domain 37                                         | 1.30  | 1.40 | 0.97 |
| A_52_P491616 | AK053892  | Nos1ap   | 70729  | nitric oxide synthase 1 (neuronal) adaptor protein          | 1.30  | 1.40 | 1.04 |
| A_51_P300337 | NM_007792 | Csrp2    | 13008  | cysteine and glycine-rich protein 2                         | 1.35  | 1.39 | 0.82 |
| A_51_P264666 | NM_009926 | Col11a2  | 12815  | collagen, type XI, alpha 2                                  | 1.35  | 1.39 | 0.82 |
| A_51_P170619 | NM_028041 | Ddx54    | 71990  | DEAD (Asp-Glu-Ala-Asp) box polypeptide 54                   | -1.13 | 0.77 | 0.82 |
| A_51_P276599 | NM_133886 | AU040320 | 100317 | expressed sequence AU040320                                 | -1.10 | 0.77 | 0.91 |
| A_52_P529013 | NM_146169 | Paip2b   | 232164 | poly(A) binding protein interacting protein 2B              | -1.11 | 0.77 | 0.91 |
| A_52_P146043 | NM_009333 | Tcf7l2   | 21416  | transcription factor 7-like 2, T-cell specific, HMG-box     | -1.08 | 0.77 | 1.04 |
| A_52_P428721 | AK122317  | Jmjd6    | 107817 | jumonji domain containing 6                                 | -1.08 | 0.76 | 1.04 |
| A_51_P519276 | NM_025843 | Ndufb7   | 66916  | NADH dehydrogenase (ubiquinone) 1 beta subcomplex, 7        | -1.07 | 0.76 | 1.04 |
| A_52_P632084 | NM_173185 | Csnk1g1  | 214897 | casein kinase 1, gamma 1                                    | -1.13 | 0.76 | 0.86 |
| A_52_P145066 | NM_028024 | Nkiras2  | 71966  | NFKB inhibitor interacting Ras-like protein 2               | -1.11 | 0.76 | 0.91 |
| A_52_P421918 | AK050769  | Helq     | 191578 | helicase, POLQ-like                                         | -1.10 | 0.76 | 0.91 |
| A_51_P142091 | NM_030121 | Asb8     | 78541  | ankyrin repeat and SOCS box-containing 8                    | -1.11 | 0.76 | 0.91 |
| A_51_P431316 | NM_025773 | Ube2w    | 66799  | ubiquitin-conjugating enzyme E2W (putative)                 | -1.09 | 0.76 | 0.97 |
| A_52_P114620 | NM_172760 | Elmo3    | 234683 | engulfment and cell motility 3, ced-12 homolog (C. elegans) | -1.10 | 0.76 | 0.91 |
| A_51_P392147 | NM_026156 | Xab2     | 67439  | XPA binding protein 2                                       | -1.10 | 0.75 | 0.97 |
| A_51_P333630 | BB204267  | Atl1     | 73991  | atlastin GTPase 1                                           | -1.12 | 0.75 | 0.86 |
| A_52_P612993 | AK144813  | Tbrg4    | 21379  | transforming growth factor beta regulated gene 4            | -1.07 | 0.75 | 1.04 |
| A_51_P349262 | NM_013604 | Mtx1     | 17827  | metaxin 1                                                   | -1.10 | 0.75 | 0.91 |
| A_51_P421950 | NM_019537 | Psmg1    | 56088  | proteasome (prosome, macropain) assembly chaperone 1        | -1.11 | 0.75 | 0.91 |
| A_51_P353592 | NM_025417 | Commd4   | 66199  | COMM domain containing 4                                    | -1.09 | 0.75 | 0.97 |
| A_52_P309890 | NM_001033 | NA       | NA     | NA                                                          | -1.07 | 0.75 | 1.04 |

|               |           |           |        |                                                                                                           |       |      |      |
|---------------|-----------|-----------|--------|-----------------------------------------------------------------------------------------------------------|-------|------|------|
| A_52_P1068723 | XM_901449 | NA        | NA     | NA                                                                                                        | -1.16 | 0.75 | 0.77 |
| A_52_P118792  | AK047244  | NA        | NA     | NA                                                                                                        | -1.08 | 0.75 | 1.04 |
| A_52_P72378   | NM_011590 | Timm17a   | 21854  | translocase of inner mitochondrial membrane 17a                                                           | -1.13 | 0.75 | 0.86 |
| A_52_P141749  | BC007477  | Mynn      | 80732  | myoneurin                                                                                                 | -1.10 | 0.75 | 0.91 |
| A_52_P580017  | NM_009353 | Terf2     | 21750  | telomeric repeat binding factor 2                                                                         | -1.14 | 0.75 | 0.82 |
| A_51_P401958  | NM_011528 | Taldo1    | 21351  | transaldolase 1                                                                                           | -1.12 | 0.75 | 0.86 |
| A_51_P175771  | NM_022009 | Flii      | 14248  | flightless I homolog (Drosophila)                                                                         | -1.07 | 0.75 | 1.04 |
| A_51_P104162  | AK053379  | Gfod1     | 328232 | glucose-fructose oxidoreductase domain containing 1<br>membrane bound O-acyltransferase domain containing | -1.18 | 0.75 | 0.67 |
| A_51_P144868  | NM_029934 | Mboat7    | 77582  | 7                                                                                                         | -1.13 | 0.75 | 0.86 |
| A_52_P414718  | NM_026474 | Sugt1     | 67955  | SGT1, suppressor of G2 allele of SKP1 (S. cerevisiae)                                                     | -1.18 | 0.75 | 0.70 |
| A_52_P408220  | AK034290  | 9330174C1 | 320682 | RIKEN cDNA 9330174C13 gene<br>mediator of RNA polymerase II transcription, subunit 4                      | -1.07 | 0.75 | 1.04 |
| A_51_P373369  | NM_026119 | Med4      | 67381  | homolog (yeast)                                                                                           | -1.17 | 0.75 | 0.70 |
| A_52_P153712  | AK037264  | Polr3g    | 67486  | polymerase (RNA) III (DNA directed) polypeptide G                                                         | -1.13 | 0.75 | 0.82 |
| A_51_P514647  | NM_026420 | Paip2     | 67869  | polyadenylate-binding protein-interacting protein 2                                                       | -1.15 | 0.75 | 0.82 |
| A_52_P160896  | BC026950  | Kynu      | 70789  | kynureninase (L-kynurenine hydrolase)                                                                     | -1.09 | 0.75 | 0.97 |
| A_51_P473907  | NM_008443 | Kif3a     | 16568  | kinesin family member 3A<br>5-methyltetrahydrofolate-homocysteine                                         | -1.12 | 0.75 | 0.86 |
| A_51_P318371  | NM_172480 | Mtrr      | 210009 | methyltransferase reductase                                                                               | -1.13 | 0.75 | 0.86 |
| A_52_P330997  | NA        | NA        | NA     | NA                                                                                                        | -1.07 | 0.75 | 1.04 |
| A_51_P390260  | NM_026444 | Cs        | 12974  | citrate synthase<br>serine (or cysteine) peptidase inhibitor, clade F,                                    | -1.19 | 0.74 | 0.67 |
| A_51_P517075  | NM_011340 | Serpinf1  | 20317  | member 1                                                                                                  | -1.08 | 0.74 | 1.04 |
| A_51_P342271  | NM_001035 | Setd6     | 66083  | SET domain containing 6                                                                                   | -1.22 | 0.74 | 0.58 |
| A_52_P517621  | AK029960  | Cep290    | 216274 | centrosomal protein 290                                                                                   | -1.07 | 0.74 | 1.04 |
| A_51_P224362  | NM_198111 | Akap6     | 238161 | A kinase (PRKA) anchor protein 6                                                                          | -1.08 | 0.74 | 1.04 |
| A_51_P179894  | NM_001033 | Rfx7      | 319758 | regulatory factor X, 7                                                                                    | -1.09 | 0.74 | 0.97 |
| A_52_P185485  | NM_026552 | Arpc4     | 68089  | actin related protein 2/3 complex, subunit 4                                                              | -1.08 | 0.74 | 1.04 |

|              |           |           |        |                                                                                       |       |      |      |
|--------------|-----------|-----------|--------|---------------------------------------------------------------------------------------|-------|------|------|
| A_52_P57296  | AK028783  | Ptpn14    | 19250  | protein tyrosine phosphatase, non-receptor type 14                                    | -1.08 | 0.74 | 1.04 |
| A_51_P414706 | NM_010027 | Ddt       | 13202  | D-dopachrome tautomerase                                                              | -1.07 | 0.74 | 1.04 |
| A_52_P116134 | NM_009656 | Aldh2     | 11669  | aldehyde dehydrogenase 2, mitochondrial                                               | -1.14 | 0.74 | 0.82 |
| A_52_P139016 | NM_028718 | Traf3ip1  | 74019  | TRAF3 interacting protein 1                                                           | -1.13 | 0.74 | 0.86 |
| A_51_P251325 | NM_013895 | Timm13    | 30055  | translocase of inner mitochondrial membrane 13 homolog (yeast)                        | -1.19 | 0.74 | 0.67 |
| A_52_P360595 | BC048783  | Eps15     | 13858  | epidermal growth factor receptor pathway substrate 15                                 | -1.21 | 0.74 | 0.61 |
| A_52_P429320 | NM_026033 | Gatad1    | 67210  | GATA zinc finger domain containing 1                                                  | -1.11 | 0.74 | 0.91 |
| A_51_P217094 | XM_620495 | Saal1     | 78935  | serum amyloid A-like 1                                                                | -1.21 | 0.74 | 0.61 |
| A_51_P355172 | AK004585  | Gm7008    | 629820 | predicted gene 7008                                                                   | -1.10 | 0.74 | 0.97 |
| A_52_P483768 | NM_178896 | Dcun1d4   | 100737 | DCN1, defective in cullin neddylation 1, domain containing 4 ( <i>S. cerevisiae</i> ) | -1.13 | 0.74 | 0.86 |
| A_51_P104456 | NM_022889 | Pes1      | 64934  | pescadillo homolog 1, containing BRCT domain (zebrafish)                              | -1.10 | 0.74 | 0.91 |
| A_52_P356228 | AK076463  | 4833412L0 | 108861 | RIKEN cDNA 4833412L08 gene                                                            | -1.07 | 0.74 | 1.04 |
| A_51_P499871 | NM_010333 | S1pr2     | 14739  | sphingosine-1-phosphate receptor 2                                                    | -1.07 | 0.74 | 1.04 |
| A_51_P459240 | AK002661  | Gstk1     | 76263  | glutathione S-transferase kappa 1                                                     | -1.14 | 0.74 | 0.82 |
| A_52_P362670 | NM_009614 | Adam15    | 11490  | a disintegrin and metalloproteinase domain 15 (metargidin)                            | -1.07 | 0.74 | 1.04 |
| A_51_P448489 | NM_010787 | Mea1      | 17256  | male enhanced antigen 1                                                               | -1.18 | 0.74 | 0.70 |
| A_51_P230267 | NM_010391 | H2-Q10    | 15007  | histocompatibility 2, Q region locus 10                                               | -1.09 | 0.74 | 0.97 |
| A_52_P294605 | XM_896388 | NA        | NA     | NA                                                                                    | -1.10 | 0.74 | 0.91 |
| A_51_P403536 | NM_175641 | Ltbp4     | 108075 | latent transforming growth factor beta binding protein 4                              | -1.14 | 0.74 | 0.82 |
| A_51_P439626 | NM_023138 | Map2k2    | 26396  | mitogen-activated protein kinase kinase 2                                             | -1.08 | 0.74 | 1.04 |
| A_51_P481788 | NM_011949 | Mapk1     | 26413  | mitogen-activated protein kinase 1                                                    | -1.08 | 0.74 | 1.04 |
| A_52_P211223 | NM_175384 | Cdca2     | 108912 | cell division cycle associated 2                                                      | -1.17 | 0.74 | 0.77 |
| A_52_P418644 | NM_019755 | Plp2      | 18824  | proteolipid protein 2                                                                 | -1.07 | 0.74 | 1.04 |
| A_51_P102503 | NM_175224 | Metap1    | 75624  | methionyl aminopeptidase 1                                                            | -1.19 | 0.74 | 0.67 |
| A_52_P515247 | NM_007486 | Arhgdib   | 11857  | Rho, GDP dissociation inhibitor (GDI) beta                                            | -1.24 | 0.74 | 0.55 |
| A_52_P292684 | NM_175399 | Exosc4    | 109075 | exosome component 4                                                                   | -1.16 | 0.74 | 0.77 |
| A_51_P365964 | NM_144884 | Tor1a     | 30931  | torsin family 1, member A (torsin A)                                                  | -1.15 | 0.74 | 0.77 |

|               |            |            |        |                                                                                                               |       |      |      |
|---------------|------------|------------|--------|---------------------------------------------------------------------------------------------------------------|-------|------|------|
| A_51_P397823  | NM_026305  | Tceb2      | 67673  | transcription elongation factor B (SIII), polypeptide 2<br>eukaryotic elongation factor, selenocysteine-tRNA- | -1.14 | 0.74 | 0.82 |
| A_51_P340402  | NM_023060  | Eefsec     | 65967  | specific                                                                                                      | -1.09 | 0.74 | 0.97 |
| A_52_P170407  | NA         | NA         | NA     | NA                                                                                                            | -1.12 | 0.74 | 0.86 |
| A_51_P257743  | NM_176835  | Dnajc22    | 72778  | Dnaj (Hsp40) homolog, subfamily C, member 22                                                                  | -1.15 | 0.74 | 0.77 |
| A_52_P416584  | AK051206   | Dars       | 226414 | aspartyl-tRNA synthetase                                                                                      | -1.16 | 0.74 | 0.77 |
| A_52_P365466  | NM_177568  | Plcb2      | 18796  | phospholipase C, beta 2                                                                                       | -1.08 | 0.74 | 1.04 |
| A_52_P57308   | AK129225   | Cand1      | 71902  | cullin associated and neddylation disassociated 1                                                             | -1.20 | 0.74 | 0.61 |
| A_51_P443393  | NM_134150  | Otub1      | 107260 | OTU domain, ubiquitin aldehyde binding 1                                                                      | -1.13 | 0.74 | 0.86 |
| A_51_P396818  | NM_025577  | 281042811! | 66462  | RIKEN cDNA 2810428115 gene                                                                                    | -1.09 | 0.74 | 0.97 |
| A_52_P589065  | NM_019709  | Mbtps1     | 56453  | membrane-bound transcription factor peptidase, site 1                                                         | -1.08 | 0.74 | 1.04 |
| A_51_P457054  | NM_172990  | Pank4      | 269614 | pantothenate kinase 4                                                                                         | -1.24 | 0.74 | 0.55 |
| A_51_P489736  | BC094370   | Tmem194b   | 227094 | transmembrane protein 194B                                                                                    | -1.23 | 0.74 | 0.58 |
| A_52_P917365  | AV141866   | NA         | NA     | NA                                                                                                            | -1.11 | 0.73 | 0.91 |
| A_52_P307394  | NM_011322  | Scn1b      | 20266  | sodium channel, voltage-gated, type I, beta                                                                   | -1.18 | 0.73 | 0.70 |
| A_51_P453909  | NM_007817  | Cyp2f2     | 13107  | cytochrome P450, family 2, subfamily f, polypeptide 2                                                         | -1.12 | 0.73 | 0.86 |
| A_52_P988461  | AK082583   | NA         | NA     | NA                                                                                                            | -1.16 | 0.73 | 0.77 |
| A_51_P161463  | NM_028492  | Ccdc103    | 73293  | coiled-coil domain containing 103                                                                             | -1.12 | 0.73 | 0.86 |
| A_51_P459320  | NM_019832  | Gkap1      | 56278  | G kinase anchoring protein 1                                                                                  | -1.15 | 0.73 | 0.77 |
| A_52_P612813  | BC070467   | Map2k7     | 26400  | mitogen-activated protein kinase kinase 7                                                                     | -1.16 | 0.73 | 0.77 |
| A_51_P332559  | NM_001029! | Safb2      | 224902 | scaffold attachment factor B2                                                                                 | -1.12 | 0.73 | 0.86 |
| A_52_P635984  | NM_001038! | Anapc11    | 66156  | anaphase promoting complex subunit 11                                                                         | -1.14 | 0.73 | 0.82 |
| A_52_P558631  | AK153648   | 6720456H2  | 218989 | RIKEN cDNA 6720456H20 gene                                                                                    | -1.08 | 0.73 | 1.04 |
| A_52_P1147740 | AK034071   | NA         | NA     | NA                                                                                                            | -1.23 | 0.73 | 0.55 |
| A_52_P313570  | NA         | NA         | NA     | NA                                                                                                            | -1.13 | 0.73 | 0.86 |
| A_51_P140350  | NM_030221  | Nadsyn1    | 78914  | NAD synthetase 1                                                                                              | -1.21 | 0.73 | 0.61 |
| A_52_P11766   | BC079668   | Whsc1      | 107823 | Wolf-Hirschhorn syndrome candidate 1 (human)                                                                  | -1.09 | 0.73 | 0.97 |
| A_52_P253317  | XM_980129  | NA         | NA     | NA                                                                                                            | -1.15 | 0.73 | 0.77 |
| A_51_P381873  | NM_009774  | Bub3       | 12237  | budding uninhibited by benzimidazoles 3 homolog (S. cerevisiae)                                               | -1.08 | 0.73 | 1.04 |
| A_51_P141190  | NM_010044  | Dffa       | 13347  | DNA fragmentation factor, alpha subunit                                                                       | -1.13 | 0.73 | 0.82 |



|              |            |           |        |                                                                                                            |       |      |      |
|--------------|------------|-----------|--------|------------------------------------------------------------------------------------------------------------|-------|------|------|
| A_52_P335892 | BC056383   | Luc7I2    | 192196 | LUC7-like 2 ( <i>S. cerevisiae</i> )<br>NIMA (never in mitosis gene a)-related expressed kinase            | -1.26 | 0.73 | 0.53 |
| A_52_P269016 | NM_145138  | Nek9      | 217718 | 9<br>solute carrier family 4 (anion exchanger), member 1,                                                  | -1.25 | 0.73 | 0.55 |
| A_52_P208544 | NM_009206  | Slc4a1ap  | 20534  | adaptor protein                                                                                            | -1.12 | 0.73 | 0.86 |
| A_51_P300378 | NM_133791  | Wwc2      | 52357  | WW, C2 and coiled-coil domain containing 2                                                                 | -1.12 | 0.73 | 0.86 |
| A_51_P185971 | NM_007589  | Calm2     | 12314  | calmodulin 2                                                                                               | -1.09 | 0.73 | 0.97 |
| A_51_P108051 | NM_011874  | Psmc4     | 23996  | 4<br>proteasome (prosome, macropain) 26S subunit, ATPase,                                                  | -1.13 | 0.73 | 0.86 |
| A_51_P413031 | NM_028898  | Rptor     | 74370  | regulatory associated protein of MTOR, complex 1                                                           | -1.10 | 0.73 | 0.91 |
| A_52_P204689 | NM_009006  | Map4k2    | 26412  | mitogen-activated protein kinase kinase kinase kinase 2                                                    | -1.23 | 0.73 | 0.58 |
| A_51_P327825 | NM_011149  | Ppib      | 19035  | peptidylprolyl isomerase B                                                                                 | -1.17 | 0.73 | 0.70 |
| A_52_P424767 | NM_009030  | Rbbp4     | 19646  | retinoblastoma binding protein 4                                                                           | -1.12 | 0.73 | 0.86 |
| A_52_P256656 | NA         | NA        | NA     | NA                                                                                                         | -1.14 | 0.73 | 0.82 |
| A_51_P354038 | NM_145439  | Tmc6      | 217353 | transmembrane channel-like gene family 6                                                                   | -1.18 | 0.73 | 0.70 |
| A_52_P276222 | NM_027231  | Polr2f    | 69833  | polymerase (RNA) II (DNA directed) polypeptide F                                                           | -1.13 | 0.73 | 0.86 |
| A_52_P497503 | NA         | NA        | NA     | NA                                                                                                         | -1.07 | 0.73 | 1.04 |
| A_51_P371675 | NM_001007! | Slc7a6os  | 66432  | solute carrier family 7, member 6 opposite strand                                                          | -1.12 | 0.73 | 0.86 |
| A_51_P364231 | NM_010752  | Mad111    | 17120  | mitotic arrest deficient 1-like 1                                                                          | -1.13 | 0.73 | 0.86 |
| A_51_P180108 | NM_028809  | Arpc5l    | 74192  | actin related protein 2/3 complex, subunit 5-like                                                          | -1.13 | 0.73 | 0.86 |
| A_52_P140528 | AK081024   | B930069K1 | 320414 | RIKEN cDNA B930069K15 gene                                                                                 | -1.19 | 0.73 | 0.67 |
| A_51_P466558 | NA         | NA        | NA     | NA                                                                                                         | -1.07 | 0.73 | 1.04 |
| A_51_P345747 | NM_172726  | E130309DC | 231868 | RIKEN cDNA E130309D02 gene                                                                                 | -1.22 | 0.73 | 0.58 |
| A_51_P127800 | NM_029654  | Atg2b     | 76559  | ATG2 autophagy related 2 homolog B ( <i>S. cerevisiae</i> )                                                | -1.19 | 0.73 | 0.67 |
| A_51_P399697 | NM_001037! | Dbi       | 13167  | diazepam binding inhibitor                                                                                 | -1.12 | 0.73 | 0.86 |
| A_52_P308669 | NM_030703  | Cpn1      | 93721  | carboxypeptidase N, polypeptide 1                                                                          | -1.10 | 0.73 | 0.91 |
| A_52_P136966 | NM_026319  | lft74     | 67694  | intraflagellar transport 74 homolog ( <i>Chlamydomonas</i> )<br>CDP-diacylglycerol synthase (phosphatidate | -1.07 | 0.73 | 1.04 |
| A_52_P283686 | NM_138651  | Cds2      | 110911 | cytidyltransferase) 2                                                                                      | -1.18 | 0.73 | 0.70 |

|              |           |                 |        |                                                                                                                                             |       |      |      |
|--------------|-----------|-----------------|--------|---------------------------------------------------------------------------------------------------------------------------------------------|-------|------|------|
| A_52_P676492 | NM_030147 | Brd8            | 78656  | bromodomain containing 8                                                                                                                    | -1.13 | 0.73 | 0.86 |
| A_51_P477414 | NM_026728 | Echdc2          | 52430  | enoyl Coenzyme A hydratase domain containing 2                                                                                              | -1.12 | 0.73 | 0.86 |
| A_52_P544760 | NM_007626 | Cbx5            | 12419  | chromobox homolog 5 (Drosophila HP1a)                                                                                                       | -1.08 | 0.73 | 1.04 |
| A_52_P16877  | NM_172051 | Tmcc3           | 319880 | transmembrane and coiled coil domains 3                                                                                                     | -1.09 | 0.73 | 0.97 |
| A_51_P415369 | NM_021397 | Zbtb32          | 58206  | zinc finger and BTB domain containing 32                                                                                                    | -1.13 | 0.73 | 0.86 |
| A_51_P340355 | NM_172310 | Tarsl2          | 272396 | threonyl-tRNA synthetase-like 2                                                                                                             | -1.10 | 0.73 | 0.91 |
| A_52_P537647 | AK036317  | Raf1            | 110157 | v-raf-leukemia viral oncogene 1                                                                                                             | -1.09 | 0.73 | 0.97 |
| A_52_P462316 | NM_024207 | Derl1           | 67819  | Der1-like domain family, member 1                                                                                                           | -1.11 | 0.73 | 0.91 |
| A_52_P398974 | NM_012065 | Pde6g           | 18588  | phosphodiesterase 6G, cGMP-specific, rod, gamma                                                                                             | -1.17 | 0.73 | 0.70 |
| A_52_P625111 | XM_923330 | NA              | NA     | NA                                                                                                                                          | -1.19 | 0.73 | 0.67 |
| A_52_P458092 | NM_008441 | Kif1b           | 16561  | kinesin family member 1B                                                                                                                    | -1.13 | 0.73 | 0.82 |
| A_51_P164270 | NM_021336 | Snrpa1          | 68981  | small nuclear ribonucleoprotein polypeptide A'                                                                                              | -1.18 | 0.73 | 0.70 |
| A_51_P151586 | NM_010353 | Gsg2            | 14841  | germ cell-specific gene 2                                                                                                                   | -1.29 | 0.73 | 0.46 |
| A_51_P431669 | NM_178113 | Ncapd3          | 78658  | non-SMC condensin II complex, subunit D3                                                                                                    | -1.22 | 0.73 | 0.58 |
| A_51_P317361 | AK160318  | Atp6v0a2        | 21871  | ATPase, H+ transporting, lysosomal V0 subunit A2<br>translocase of inner mitochondrial membrane 8                                           | -1.07 | 0.73 | 1.04 |
| A_52_P520397 | NM_013897 | Timm8b          | 30057  | homolog b (yeast)<br>mitochondria-associated protein involved in<br>granulocyte-macrophage colony-stimulating factor<br>signal transduction | -1.14 | 0.73 | 0.82 |
| A_51_P246944 | NM_025571 | Magmas          | 66449  | nuclear transcription factor, X-box binding 1                                                                                               | -1.15 | 0.73 | 0.77 |
| A_51_P376765 | NM_023739 | Nfx1            | 74164  | translocase of inner mitochondrial membrane 13                                                                                              | -1.08 | 0.73 | 1.04 |
| A_52_P338180 | NM_013895 | Timm13          | 30055  | homolog (yeast)                                                                                                                             | -1.35 | 0.72 | 0.34 |
| A_52_P215186 | NM_026046 | Zfp329          | 67230  | zinc finger protein 329                                                                                                                     | -1.14 | 0.72 | 0.82 |
| A_51_P291936 | NM_008060 | Ganab           | 14376  | alpha glucosidase 2 alpha neutral subunit                                                                                                   | -1.11 | 0.72 | 0.91 |
| A_51_P486639 | XM_901483 | 2310028O1433771 |        | RIKEN cDNA 2310028O11 gene<br>ubiquitin-conjugating enzyme E2K (UBC1 homolog,<br>yeast)                                                     | -1.11 | 0.72 | 0.91 |
| A_51_P363714 | NM_016786 | Ube2k           | 53323  | 5',3'-nucleotidase, cytosolic                                                                                                               | -1.16 | 0.72 | 0.77 |
| A_52_P423849 | NM_015807 | Nt5c            | 50773  | NA                                                                                                                                          | -1.14 | 0.72 | 0.82 |
| A_52_P618342 | NA        | NA              | NA     | NA                                                                                                                                          | -1.07 | 0.72 | 1.04 |
| A_51_P159610 | NM_207202 | Ccdc120         | 54648  | coiled-coil domain containing 120                                                                                                           | -1.16 | 0.72 | 0.77 |

|              |           |                |        |                                                                                                                                                    |       |      |      |
|--------------|-----------|----------------|--------|----------------------------------------------------------------------------------------------------------------------------------------------------|-------|------|------|
| A_52_P437321 | NM_011591 | Timm17b        | 21855  | translocase of inner mitochondrial membrane 17b                                                                                                    | -1.29 | 0.72 | 0.46 |
| A_52_P24382  | NM_029282 | 2610036D175425 |        | RIKEN cDNA 2610036D13 gene                                                                                                                         | -1.11 | 0.72 | 0.91 |
| A_51_P353856 | NM_026861 | Ubac2          | 68889  | ubiquitin associated domain containing 2                                                                                                           | -1.11 | 0.72 | 0.91 |
| A_51_P285446 | NM_010715 | Lig1           | 16881  | ligase I, DNA, ATP-dependent                                                                                                                       | -1.16 | 0.72 | 0.77 |
| A_52_P79506  | NM_001024 | Zfp667         | 384763 | zinc finger protein 667                                                                                                                            | -1.09 | 0.72 | 0.97 |
| A_51_P192860 | NM_008248 | Hint1          | 15254  | histidine triad nucleotide binding protein 1                                                                                                       | -1.22 | 0.72 | 0.58 |
| A_51_P169409 | NM_182994 | Arl5a          | 75423  | ADP-ribosylation factor-like 5A                                                                                                                    | -1.16 | 0.72 | 0.77 |
| A_52_P462296 | NM_007755 | Cpeb1          | 12877  | cytoplasmic polyadenylation element binding protein 1<br>DNA segment, Chr 10, Johns Hopkins University 81                                          | -1.17 | 0.72 | 0.70 |
| A_51_P118320 | NM_138601 | D10Jhu81e      | 28295  | expressed                                                                                                                                          | -1.11 | 0.72 | 0.91 |
| A_51_P387342 | NM_025442 | Alg5           | 66248  | asparagine-linked glycosylation 5 homolog (yeast,<br>dolichyl-phosphate beta-glucosyltransferase)<br>COP9 (constitutive photomorphogenic) homolog, | -1.13 | 0.72 | 0.86 |
| A_51_P371119 | NM_012001 | Cops4          | 26891  | subunit 4 ( <i>Arabidopsis thaliana</i> )                                                                                                          | -1.28 | 0.72 | 0.46 |
| A_52_P41728  | NM_009066 | Ring1          | 19763  | ring finger protein 1                                                                                                                              | -1.14 | 0.72 | 0.82 |
| A_52_P82510  | NM_008707 | Nmt1           | 18107  | N-myristoyltransferase 1                                                                                                                           | -1.15 | 0.72 | 0.77 |
| A_51_P130595 | AK005822  | Gm10345        | 1E+08  | predicted gene 10345                                                                                                                               | -1.16 | 0.72 | 0.77 |
| A_52_P255804 | XM_990359 | NA             | NA     | NA                                                                                                                                                 | -1.26 | 0.72 | 0.53 |
| A_51_P307427 | XM_001000 | NA             | NA     | NA                                                                                                                                                 | -1.09 | 0.72 | 0.97 |
| A_51_P191700 | NM_009929 | Col18a1        | 12822  | collagen, type XVIII, alpha 1                                                                                                                      | -1.16 | 0.72 | 0.77 |
| A_51_P162426 | NM_021419 | Rnf8           | 58230  | ring finger protein 8                                                                                                                              | -1.15 | 0.72 | 0.82 |
| A_51_P406115 | NM_007399 | Adam10         | 11487  | a disintegrin and metallopeptidase domain 10<br>nudix (nucleoside diphosphate linked moiety X)-type                                                | -1.18 | 0.72 | 0.70 |
| A_51_P110814 | NM_028794 | Nudt9          | 74167  | motif 9                                                                                                                                            | -1.24 | 0.72 | 0.55 |
| A_51_P198675 | NM_138951 | Ttc36          | 192653 | tetratricopeptide repeat domain 36                                                                                                                 | -1.13 | 0.72 | 0.86 |
| A_52_P271614 | NM_001039 | Dnm2           | 13430  | dynamitin 2<br>Tax1 (human T-cell leukemia virus type I) binding                                                                                   | -1.18 | 0.72 | 0.70 |
| A_51_P487384 | NM_029564 | Tax1bp3        | 76281  | protein 3                                                                                                                                          | -1.11 | 0.72 | 0.91 |
| A_52_P339011 | NM_021360 | Neurl1a        | 18011  | neuralized homolog 1A ( <i>Drosophila</i> )                                                                                                        | -1.22 | 0.72 | 0.61 |
| A_51_P261379 | NM_139140 | Spats2         | 72572  | spermatogenesis associated, serine-rich 2                                                                                                          | -1.09 | 0.72 | 0.97 |
| A_51_P395727 | NM_019575 | Scamp4         | 56214  | secretory carrier membrane protein 4                                                                                                               | -1.11 | 0.72 | 0.91 |

|              |           |                |        |                                                                                                     |       |      |      |
|--------------|-----------|----------------|--------|-----------------------------------------------------------------------------------------------------|-------|------|------|
| A_51_P176783 | NM_001033 | ENSMUSGC382423 |        | predicted gene, ENSMUSG00000074747<br>low density lipoprotein receptor class A domain               | -1.35 | 0.72 | 0.37 |
| A_52_P131778 | NM_178886 | Ldlrad3        | 241576 | containing 3                                                                                        | -1.22 | 0.72 | 0.58 |
| A_51_P288026 | NM_173400 | Haus6          | 230376 | HAUS augmin-like complex, subunit 6                                                                 | -1.15 | 0.72 | 0.77 |
| A_51_P376857 | NM_029585 | Det1           | 76375  | de-etiolated homolog 1 (Arabidopsis)                                                                | -1.23 | 0.72 | 0.58 |
| A_52_P411331 | NM_146216 | Vac14          | 234729 | Vac14 homolog (S. cerevisiae)                                                                       | -1.24 | 0.72 | 0.55 |
| A_52_P405362 | XM_992182 | NA             | NA     | NA                                                                                                  | -1.14 | 0.72 | 0.82 |
| A_52_P634856 | NM_011779 | Coro1c         | 23790  | coronin, actin binding protein 1C                                                                   | -1.32 | 0.72 | 0.40 |
| A_51_P194999 | NM_027931 | Tars2          | 71807  | threonyl-tRNA synthetase 2, mitochondrial (putative)                                                | -1.11 | 0.72 | 0.91 |
| A_51_P401717 | NM_145421 | Fam108a        | 216169 | family with sequence similarity 108, member A                                                       | -1.14 | 0.72 | 0.82 |
| A_52_P143847 | NM_021505 | Anapc5         | 59008  | anaphase-promoting complex subunit 5                                                                | -1.27 | 0.72 | 0.50 |
| A_51_P316188 | NM_025526 | Iscu           | 66383  | IscU iron-sulfur cluster scaffold homolog (E. coli)                                                 | -1.07 | 0.72 | 1.04 |
| A_52_P145878 | AK164650  | 5530601H04     | 71445  | RIKEN cDNA 5530601H04 gene                                                                          | -1.19 | 0.72 | 0.67 |
| A_51_P393668 | NM_181540 | Tm6sf2         | 107770 | transmembrane 6 superfamily member 2                                                                | -1.15 | 0.72 | 0.82 |
| A_52_P192664 | BC027287  | Chd6           | 71389  | chromodomain helicase DNA binding protein 6<br>HSPA (heat shock 70kDa) binding protein, cytoplasmic | -1.14 | 0.72 | 0.82 |
| A_51_P140140 | NM_024172 | Hspbp1         | 66245  | cochaperone 1                                                                                       | -1.07 | 0.72 | 1.04 |
| A_51_P457492 | NM_025791 | Tmem223        | 66836  | transmembrane protein 223                                                                           | -1.13 | 0.72 | 0.86 |
| A_51_P168745 | NM_023712 | Spns1          | 73658  | spinstar homolog 1 (Drosophila)<br>pyridoxal-dependent decarboxylase domain containing              | -1.29 | 0.72 | 0.46 |
| A_52_P542290 | NM_053181 | Pdxdc1         | 94184  | 1                                                                                                   | -1.16 | 0.72 | 0.77 |
| A_52_P422618 | NM_007397 | Acvr2b         | 11481  | activin receptor IIB<br>CTD (carboxy-terminal domain, RNA polymerase II,                            | -1.07 | 0.72 | 1.04 |
| A_52_P268250 | NM_146012 | Ctdsp2         | 52468  | polypeptide A) small phosphatase 2                                                                  | -1.16 | 0.72 | 0.77 |
| A_51_P378754 | NM_017467 | Zfp316         | 54201  | zinc finger protein 316                                                                             | -1.19 | 0.72 | 0.67 |
| A_52_P569958 | NM_001039 | Pde4dip        | 83679  | phosphodiesterase 4D interacting protein (myomegalin)                                               | -1.29 | 0.72 | 0.46 |
| A_51_P156564 | XM_138271 | Zfp839         | 72805  | zinc finger protein 839                                                                             | -1.26 | 0.72 | 0.50 |
| A_52_P58281  | NM_145979 | Chd4           | 107932 | chromodomain helicase DNA binding protein 4                                                         | -1.12 | 0.72 | 0.86 |
| A_51_P413785 | NM_147778 | Comm3          | 12238  | COMM domain containing 3                                                                            | -1.29 | 0.72 | 0.46 |
| A_52_P296682 | NM_030262 | Pofut2         | 80294  | protein O-fucosyltransferase 2                                                                      | -1.14 | 0.72 | 0.82 |
| A_51_P463536 | NM_010791 | Meox1          | 17285  | mesenchyme homeobox 1                                                                               | -1.22 | 0.72 | 0.61 |
| A_52_P452504 | AW122171  | NA             | NA     | NA                                                                                                  | -1.13 | 0.72 | 0.86 |

|              |           |                 |        |                                                                         |       |      |      |
|--------------|-----------|-----------------|--------|-------------------------------------------------------------------------|-------|------|------|
| A_51_P129929 | NM_177899 | D330038O(330788 |        | RIKEN cDNA D330038O06 gene                                              | -1.07 | 0.72 | 1.04 |
| A_52_P654021 | NM_009357 | Tex261          | 21766  | testis expressed gene 261                                               | -1.10 | 0.72 | 0.91 |
| A_52_P564625 | AK161008  | Ube2b           | 22210  | ubiquitin-conjugating enzyme E2B, RAD6 homology (S. cerevisiae)         | -1.15 | 0.72 | 0.82 |
| A_52_P632227 | NM_029365 | Med25           | 75613  | mediator of RNA polymerase II transcription, subunit 25 homolog (yeast) | -1.11 | 0.72 | 0.91 |
| A_51_P314019 | NM_001038 | Banf1           | 23825  | barrier to autointegration factor 1                                     | -1.26 | 0.72 | 0.53 |
| A_52_P258124 | NM_175530 | Fbxo46          | 243867 | F-box protein 46                                                        | -1.10 | 0.72 | 0.91 |
| A_51_P200144 | NM_026550 | Pak1ip1         | 68083  | PAK1 interacting protein 1                                              | -1.34 | 0.72 | 0.37 |
| A_51_P300297 | NM_026075 | Sfrs12ip1       | 67288  | SFRS12-interacting protein 1                                            | -1.17 | 0.72 | 0.70 |
| A_52_P264368 | NM_025542 | 2410001C2       | 66404  | RIKEN cDNA 2410001C21 gene                                              | -1.14 | 0.72 | 0.82 |
| A_51_P158462 | AK035967  | NA              | NA     | NA                                                                      | -1.21 | 0.72 | 0.61 |
| A_51_P465772 | NM_019685 | Ruvbl1          | 56505  | RuvB-like protein 1                                                     | -1.18 | 0.72 | 0.70 |
| A_52_P46986  | AK010433  | Cryz1           | 66609  | crystallin, zeta (quinone reductase)-like 1                             | -1.14 | 0.72 | 0.82 |
| A_51_P165408 | XM_355648 | Srcrb4d         | 109267 | scavenger receptor cysteine rich domain containing, group B (4 domains) | -1.16 | 0.72 | 0.77 |
| A_51_P105178 | NM_009238 | Sox4            | 20677  | SRY-box containing gene 4                                               | -1.20 | 0.72 | 0.61 |
| A_52_P995381 | BB814947  | NA              | NA     | NA                                                                      | -1.23 | 0.72 | 0.58 |
| A_52_P686136 | NM_172661 | Bat2l           | 227723 | HLA-B associated transcript 2-like                                      | -1.18 | 0.72 | 0.67 |
| A_52_P23476  | NM_177214 | Snrnp200        | 320632 | small nuclear ribonucleoprotein 200 (U5)                                | -1.14 | 0.72 | 0.82 |
| A_52_P72487  | NM_011936 | Fto             | 26383  | fat mass and obesity associated                                         | -1.18 | 0.72 | 0.70 |
| A_51_P160202 | NM_008740 | Nsf             | 18195  | N-ethylmaleimide sensitive fusion protein                               | -1.14 | 0.72 | 0.82 |
| A_52_P301503 | NM_007941 | Stx2            | 13852  | syntaxin 2                                                              | -1.13 | 0.72 | 0.86 |
| A_51_P346516 | NM_008974 | Ptp4a2          | 19244  | protein tyrosine phosphatase 4a2                                        | -1.10 | 0.72 | 0.91 |
| A_52_P238027 | NM_017372 | Lyz2            | 17105  | lysozyme 2                                                              | -1.22 | 0.72 | 0.58 |
| A_52_P287052 | NM_020491 | Sssca1          | 56390  | Sjogren's syndrome/scleroderma autoantigen 1 homolog (human)            | -1.19 | 0.72 | 0.67 |
| A_51_P147654 | AK170049  | Tex261          | 21766  | testis expressed gene 261                                               | -1.17 | 0.72 | 0.70 |
| A_51_P160787 | NM_007491 | Art5            | 11875  | ADP-ribosyltransferase 5                                                | -1.15 | 0.72 | 0.77 |
| A_51_P100246 | NM_145578 | Ube2m           | 22192  | ubiquitin-conjugating enzyme E2M (UBC12 homolog, yeast)                 | -1.20 | 0.72 | 0.61 |
| A_51_P373441 | NM_026948 | Cuta            | 67675  | cutA divalent cation tolerance homolog (E. coli)                        | -1.16 | 0.72 | 0.77 |
| A_52_P568888 | BC100475  | 1110034G2       | 73747  | RIKEN cDNA 1110034G24 gene                                              | -1.21 | 0.72 | 0.61 |
| A_51_P456838 | NM_178674 | Fbxl21          | 213311 | F-box and leucine-rich repeat protein 21                                | -1.17 | 0.72 | 0.70 |

|              |           |           |        |                                                                                                           |       |      |      |
|--------------|-----------|-----------|--------|-----------------------------------------------------------------------------------------------------------|-------|------|------|
| A_51_P405089 | NM_145376 | Lpcat1    | 210992 | lysophosphatidylcholine acyltransferase 1                                                                 | -1.16 | 0.72 | 0.77 |
| A_51_P341664 | NM_133228 | Zfp87     | 170763 | zinc finger protein 87                                                                                    | -1.10 | 0.72 | 0.97 |
| A_51_P296090 | NM_144932 | Acsf3     | 257633 | acyl-CoA synthetase family member 3                                                                       | -1.08 | 0.72 | 0.97 |
| A_52_P661722 | NM_133684 | Mosc2     | 67247  | MOCO sulphurase C-terminal domain containing 2                                                            | -1.16 | 0.71 | 0.77 |
| A_52_P923110 | AK031957  | 6330509M1 | 102913 | RIKEN cDNA 6330509M05 gene                                                                                | -1.09 | 0.71 | 0.97 |
| A_51_P402480 | AK173166  | Fam135a   | 68187  | family with sequence similarity 135, member A                                                             | -1.13 | 0.71 | 0.86 |
| A_51_P485161 | NM_009946 | Cplx2     | 12890  | complexin 2                                                                                               | -1.15 | 0.71 | 0.82 |
| A_51_P440694 | NM_029846 | Atg16l1   | 77040  | autophagy-related 16-like 1 (yeast)                                                                       | -1.09 | 0.71 | 0.97 |
| A_52_P497056 | NM_019995 | Fam48a    | 56790  | family with sequence similarity 48, member A<br>solute carrier family 27 (fatty acid transporter), member | -1.32 | 0.71 | 0.40 |
| A_52_P61854  | NM_011989 | Slc27a4   | 26569  | 4                                                                                                         | -1.25 | 0.71 | 0.53 |
| A_51_P384879 | NM_008617 | Mdh2      | 17448  | malate dehydrogenase 2, NAD (mitochondrial)                                                               | -1.08 | 0.71 | 0.97 |
| A_52_P76629  | AK148746  | NA        | NA     | NA                                                                                                        | -1.12 | 0.71 | 0.86 |
| A_51_P320105 | NM_026796 | Smyd2     | 226830 | SET and MYND domain containing 2                                                                          | -1.17 | 0.71 | 0.70 |
| A_52_P258507 | AK004266  | Ppp1r10   | 52040  | protein phosphatase 1, regulatory subunit 10                                                              | -1.12 | 0.71 | 0.86 |
| A_52_P428228 | NM_026977 | 1810031K1 | 69171  | RIKEN cDNA 1810031K17 gene                                                                                | -1.17 | 0.71 | 0.70 |
| A_51_P157214 | NM_008246 | Hiat1     | 15247  | hippocampus abundant gene transcript 1                                                                    | -1.21 | 0.71 | 0.61 |
| A_52_P383913 | AK020775  | Trim35    | 66854  | tripartite motif-containing 35                                                                            | -1.21 | 0.71 | 0.61 |
| A_51_P141932 | NM_181413 | Anks1     | 224650 | ankyrin repeat and SAM domain containing 1                                                                | -1.10 | 0.71 | 0.91 |
| A_51_P253732 | NM_027265 | NA        | NA     | NA                                                                                                        | -1.09 | 0.71 | 0.97 |
| A_52_P83252  | NM_008281 | Hpn       | 15451  | hepsin                                                                                                    | -1.21 | 0.71 | 0.61 |
| A_52_P272945 | NM_023243 | Ccnh      | 66671  | cyclin H                                                                                                  | -1.38 | 0.71 | 0.30 |
| A_51_P161890 | NM_010189 | Fcgrt     | 14132  | Fc receptor, IgG, alpha chain transporter                                                                 | -1.22 | 0.71 | 0.58 |
| A_52_P206526 | NM_053266 | Gtf2ird2  | 114674 | GTF2I repeat domain containing 2                                                                          | -1.13 | 0.71 | 0.82 |
| A_51_P370825 | NM_026964 | Ccdc124   | 234388 | coiled-coil domain containing 124                                                                         | -1.34 | 0.71 | 0.37 |
| A_51_P394014 | NM_133686 | Qprt      | 67375  | quinolinate phosphoribosyltransferase                                                                     | -1.07 | 0.71 | 1.04 |
| A_52_P123384 | NM_011870 | Cib1      | 23991  | calcium and integrin binding 1 (calmyrin)                                                                 | -1.16 | 0.71 | 0.77 |
| A_51_P300277 | NM_009898 | Coro1a    | 12721  | coronin, actin binding protein 1A                                                                         | -1.10 | 0.71 | 0.91 |
| A_52_P194680 | BI152977  | NA        | NA     | NA                                                                                                        | -1.21 | 0.71 | 0.61 |
| A_52_P525574 | NM_010642 | Klk1b21   | 16616  | kallikrein 1-related peptidase b21                                                                        | -1.11 | 0.71 | 0.91 |
| A_51_P176352 | NM_013864 | Ndrp2     | 29811  | N-myc downstream regulated gene 2                                                                         | -1.19 | 0.71 | 0.67 |
| A_51_P230552 | NM_009053 | Rfng      | 19719  | RFNG O-fucosylpeptide 3-beta-N-acetylglucosaminyltransferase                                              | -1.09 | 0.71 | 0.97 |

|               |           |              |        |                                                              |       |      |      |
|---------------|-----------|--------------|--------|--------------------------------------------------------------|-------|------|------|
| A_52_P192651  | NM_207220 | Gpr137       | 107173 | G protein-coupled receptor 137                               | -1.16 | 0.71 | 0.77 |
| A_52_P282186  | AK173104  | Slc45a4      | 106068 | solute carrier family 45, member 4                           | -1.34 | 0.71 | 0.37 |
| A_51_P379822  | NM_153567 | Slain2       | 75991  | SLAIN motif family, member 2                                 | -1.23 | 0.71 | 0.58 |
| A_52_P1123358 | AK019067  | 221041511    | 78320  | RIKEN cDNA 2210415111 gene                                   | -1.21 | 0.71 | 0.61 |
| A_52_P287683  | NM_181414 | Pik3c3       | 225326 | phosphoinositide-3-kinase, class 3                           | -1.08 | 0.71 | 1.04 |
| A_51_P368855  | NM_010385 | H2-Ke2       | 14976  | H2-K region expressed gene 2                                 | -1.18 | 0.71 | 0.70 |
| A_51_P297552  | NM_198107 | Med16        | 216154 | mediator complex subunit 16                                  | -1.11 | 0.71 | 0.91 |
| A_51_P163958  | NM_011467 | Spr          | 20751  | sepiapterin reductase                                        | -1.07 | 0.71 | 1.04 |
| A_51_P456980  | AJ001373  | Itgb1bp1     | 16413  | integrin beta 1 binding protein 1                            | -1.14 | 0.71 | 0.82 |
| A_51_P508775  | NM_011846 | Mmp17        | 23948  | matrix metalloproteinase 17                                  | -1.19 | 0.71 | 0.67 |
| A_52_P261846  | NM_009929 | Col18a1      | 12822  | collagen, type XVIII, alpha 1                                | -1.08 | 0.71 | 0.97 |
| A_51_P241667  | NM_011159 | Prkdc        | 19090  | protein kinase, DNA activated, catalytic polypeptide         | -1.08 | 0.71 | 1.04 |
| A_51_P345902  | NM_133964 | Dohh         | 102115 | deoxyhypusine hydroxylase/monooxygenase                      | -1.08 | 0.71 | 1.04 |
| A_51_P348985  | NM_026198 | Tmem167b     | 67495  | transmembrane protein 167B                                   | -1.17 | 0.71 | 0.77 |
| A_51_P232474  | NM_028028 | Zswim1       | 71971  | zinc finger, SWIM domain containing 1                        | -1.20 | 0.71 | 0.61 |
| A_52_P1068094 | AK037508  | A130022J2    | 320617 | RIKEN cDNA A130022J21 gene                                   | -1.16 | 0.71 | 0.77 |
| A_51_P183853  | NM_178602 | Grin1a       | 28015  | glutamate receptor, ionotropic, N-methyl D-aspartate-like 1A | -1.39 | 0.71 | 0.28 |
| A_51_P157840  | NM_023850 | Chst1        | 76969  | carbohydrate (keratan sulfate Gal-6) sulfotransferase 1      | -1.35 | 0.71 | 0.34 |
| A_52_P100381  | BC051084  | Zbtb42       | 382639 | zinc finger and BTB domain containing 42                     | -1.07 | 0.71 | 1.04 |
| A_51_P183515  | AK008958  | 221041601    | 70393  | RIKEN cDNA 2210416015 gene                                   | -1.34 | 0.71 | 0.37 |
| A_52_P269956  | NM_025904 | 1600012F0    | 67008  | RIKEN cDNA 1600012F09 gene                                   | -1.17 | 0.71 | 0.77 |
| A_51_P217307  | AK017468  | Fam175a      | 70681  | family with sequence similarity 175, member A                | -1.26 | 0.71 | 0.53 |
| A_51_P487162  | NM_028002 | Dus4l        | 71916  | dihydrouridine synthase 4-like (S. cerevisiae)               | -1.12 | 0.71 | 0.86 |
| A_51_P311125  | NM_024250 | Phf10        | 72057  | PHD finger protein 10                                        | -1.12 | 0.71 | 0.86 |
| A_52_P649419  | AK162561  | 3110052M0    | 73229  | RIKEN cDNA 3110052M02 gene                                   | -1.17 | 0.71 | 0.70 |
| A_52_P650288  | NM_029963 | Mrps5        | 77721  | mitochondrial ribosomal protein S5                           | -1.19 | 0.71 | 0.67 |
| A_52_P576100  | NM_011363 | Sh2b1        | 20399  | SH2B adaptor protein 1                                       | -1.09 | 0.71 | 0.97 |
| A_52_P118591  | NM_001034 | Tnfsf12-Tnfr | 619441 | Tnfsf12-tnfsf13 readthrough transcript                       | -1.32 | 0.71 | 0.40 |
| A_52_P336268  | NM_145427 | Atpaf2       | 246782 | ATP synthase mitochondrial F1 complex assembly factor 2      | -1.26 | 0.71 | 0.53 |
| A_52_P187787  | NM_023231 | Stoml2       | 66592  | stomatin (Epb7.2)-like 2                                     | -1.10 | 0.71 | 0.91 |

|              |           |          |        |                                                                                             |       |      |      |
|--------------|-----------|----------|--------|---------------------------------------------------------------------------------------------|-------|------|------|
|              |           |          |        | succinate dehydrogenase complex, subunit B, iron sulfur (Ip)                                | -1.11 | 0.71 | 0.91 |
| A_51_P234853 | NM_023374 | Sdhd     | 67680  |                                                                                             |       |      |      |
| A_51_P150608 | NM_026365 | Jagn1    | 67767  | jagunal homolog 1 (Drosophila)                                                              | -1.07 | 0.71 | 1.04 |
| A_51_P223111 | NM_028661 | Fam98c   | 73833  | family with sequence similarity 98, member C                                                | -1.31 | 0.71 | 0.44 |
| A_52_P650473 | NA        | NA       | NA     | NA                                                                                          | -1.15 | 0.71 | 0.82 |
| A_51_P393761 | NM_153064 | Ndufs2   | 226646 | NADH dehydrogenase (ubiquinone) Fe-S protein 2                                              | -1.12 | 0.71 | 0.86 |
| A_52_P655982 | NM_010926 | Cox4nb   | 18117  | COX4 neighbor                                                                               | -1.24 | 0.71 | 0.55 |
| A_51_P449956 | NM_019795 | Dnajc7   | 56354  | Dnal (Hsp40) homolog, subfamily C, member 7                                                 | -1.26 | 0.71 | 0.53 |
| A_51_P427603 | NM_144935 | BC018242 | 235044 | cDNA sequence BC018242                                                                      | -1.09 | 0.71 | 0.97 |
| A_51_P382588 | NM_019709 | Mbtps1   | 56453  | membrane-bound transcription factor peptidase, site 1                                       | -1.09 | 0.71 | 0.97 |
| A_51_P146382 | NM_001024 | NA       | NA     | NA                                                                                          | -1.11 | 0.71 | 0.91 |
| A_51_P428505 | NM_025327 | Krtcap2  | 66059  | keratinocyte associated protein 2                                                           | -1.40 | 0.71 | 0.28 |
| A_51_P406519 | NM_001039 | Rapgef1  | 107746 | Rap guanine nucleotide exchange factor (GEF) 1                                              | -1.17 | 0.71 | 0.70 |
| A_51_P318856 | NM_145935 | Glyat    | 107146 | glycine-N-acyltransferase                                                                   | -1.29 | 0.71 | 0.46 |
| A_51_P156631 | NM_028419 | Glrx5    | 73046  | glutaredoxin 5 homolog (S. cerevisiae)                                                      | -1.13 | 0.71 | 0.86 |
| A_51_P255844 | NM_028300 | Pih1d2   | 72614  | PIH1 domain containing 2                                                                    | -1.14 | 0.71 | 0.82 |
| A_52_P705980 | AK018474  | 8430437O | 71536  | RIKEN cDNA 8430437O03 gene                                                                  | -1.18 | 0.71 | 0.70 |
| A_51_P366960 | NM_016763 | Hsd17b10 | 15108  | hydroxysteroid (17-beta) dehydrogenase 10                                                   | -1.21 | 0.71 | 0.61 |
| A_52_P145912 | NM_139300 | Mylk     | 107589 | myosin, light polypeptide kinase                                                            | -1.07 | 0.71 | 1.04 |
| A_51_P293059 | NM_133722 | Fam108c  | 70178  | family with sequence similarity 108, member C                                               | -1.15 | 0.71 | 0.82 |
| A_51_P338878 | NM_027571 | P2ry12   | 70839  | purinergic receptor P2Y, G-protein coupled 12                                               | -1.30 | 0.71 | 0.44 |
| A_52_P274591 | NM_181328 | Slc25a29 | 214663 | solute carrier family 25 (mitochondrial carrier, palmitoylcarnitine transporter), member 29 | -1.12 | 0.71 | 0.86 |
| A_51_P336114 | AK154592  | Wdr62    | 233064 | WD repeat domain 62                                                                         | -1.11 | 0.71 | 0.91 |
| A_51_P313581 | NM_007980 | Fabp2    | 14079  | fatty acid binding protein 2, intestinal                                                    | -1.24 | 0.71 | 0.55 |
| A_52_P874367 | AK014267  | 3110080O | 73241  | RIKEN cDNA 3110080O07 gene                                                                  | -1.13 | 0.71 | 0.86 |
| A_51_P312482 | NM_026613 | Ccdc34   | 68201  | coiled-coil domain containing 34                                                            | -1.13 | 0.71 | 0.86 |
| A_52_P276412 | AK011886  | Atpif1   | 11983  | ATPase inhibitory factor 1                                                                  | -1.17 | 0.71 | 0.77 |
| A_52_P467140 | NM_019776 | Snd1     | 56463  | staphylococcal nuclease and tudor domain containing 1                                       | -1.16 | 0.71 | 0.77 |
| A_51_P471386 | NM_011800 | Cdh20    | 23836  | cadherin 20                                                                                 | -1.11 | 0.71 | 0.91 |
| A_52_P536538 | AK013007  | 1810030N | 266291 | RIKEN cDNA 1810030N24 gene                                                                  | -1.14 | 0.71 | 0.82 |



|              |           |            |        |                                                                                  |       |      |      |
|--------------|-----------|------------|--------|----------------------------------------------------------------------------------|-------|------|------|
| A_52_P144297 | NM_198617 | Tspyl3     | 241732 | TSPY-like 3                                                                      | -1.18 | 0.71 | 0.70 |
| A_52_P185054 | AK004111  | 1110035H1  | 168686 | RIKEN cDNA 1110035H17 gene                                                       | -1.20 | 0.71 | 0.61 |
| A_52_P549977 | NM_026455 | Fam32a     | 67922  | family with sequence similarity 32, member A                                     | -1.14 | 0.71 | 0.82 |
| A_51_P246119 | XM_899897 | NA         | NA     | NA                                                                               | -1.12 | 0.71 | 0.86 |
| A_51_P269173 | NM_133981 | Alg9       | 102580 | asparagine-linked glycosylation 9 homolog (yeast, alpha 1,2 mannosyltransferase) | -1.24 | 0.71 | 0.55 |
| A_52_P360351 | AK083336  | C920008N2  | 319366 | RIKEN cDNA C920008N22 gene                                                       | -1.25 | 0.71 | 0.53 |
| A_51_P254553 | NM_025947 | Dynlrb1    | 67068  | dynein light chain roadblock-type 1                                              | -1.13 | 0.71 | 0.86 |
| A_52_P401723 | NM_011509 | Gm3258     | 1E+08  | predicted gene 3258                                                              | -1.21 | 0.71 | 0.61 |
| A_51_P361563 | NM_145385 | Mlf2       | 30853  | myeloid leukemia factor 2                                                        | -1.24 | 0.71 | 0.55 |
| A_52_P54906  | XR_004464 | NA         | NA     | NA                                                                               | -1.24 | 0.71 | 0.55 |
| A_52_P137293 | BC038492  | Stradb     | 227154 | STE20-related kinase adaptor beta                                                | -1.15 | 0.71 | 0.82 |
| A_51_P303824 | NM_029588 | 1700012L0  | 76383  | RIKEN cDNA 1700012L04 gene                                                       | -1.31 | 0.71 | 0.40 |
| A_51_P467558 | NM_011650 | Tsn        | 22099  | translin                                                                         | -1.18 | 0.71 | 0.70 |
| A_52_P386832 | NM_194348 | Atg2a      | 329015 | ATG2 autophagy related 2 homolog A ( <i>S. cerevisiae</i> )                      | -1.14 | 0.71 | 0.82 |
| A_52_P401579 | NM_145390 | Tnpo2      | 212999 | transportin 2 (importin 3, karyopherin beta 2b)                                  | -1.19 | 0.71 | 0.67 |
| A_51_P115817 | NM_023884 | Ralgps2    | 78255  | Ral GEF with PH domain and SH3 binding motif 2                                   | -1.13 | 0.71 | 0.86 |
| A_51_P472488 | NM_019836 | 2610024G1  | 156412 | RIKEN cDNA 2610024G14 gene                                                       | -1.19 | 0.71 | 0.67 |
| A_52_P327791 | AK032600  | Cdadcl     | 71891  | cytidine and dCMP deaminase domain containing 1                                  | -1.18 | 0.71 | 0.70 |
| A_51_P389724 | NM_009024 | Rara       | 19401  | retinoic acid receptor, alpha                                                    | -1.25 | 0.71 | 0.53 |
| A_52_P499297 | NM_019831 | Zmym3      | 56364  | zinc finger, MYM-type 3                                                          | -1.12 | 0.71 | 0.86 |
| A_52_P434039 | NM_030597 | Lsm2       | 27756  | LSM2 homolog, U6 small nuclear RNA associated ( <i>S. cerevisiae</i> )           | -1.09 | 0.71 | 0.97 |
| A_52_P104169 | NM_001008 | Zfp658     | 210104 | zinc finger protein 658                                                          | -1.12 | 0.71 | 0.86 |
| A_51_P274685 | NM_026824 | Dus1l      | 68730  | dihydrouridine synthase 1-like ( <i>S. cerevisiae</i> )                          | -1.26 | 0.71 | 0.53 |
| A_52_P469657 | BC089304  | 2210018M   | 233545 | RIKEN cDNA 2210018M11 gene                                                       | -1.19 | 0.70 | 0.67 |
| A_51_P371942 | NM_008788 | Pcolce     | 18542  | procollagen C-endopeptidase enhancer protein                                     | -1.12 | 0.70 | 0.86 |
| A_51_P308814 | NM_026654 | Toe1       | 68276  | target of EGR1, member 1 (nuclear)                                               | -1.25 | 0.70 | 0.53 |
| A_51_P391668 | NM_001007 | D8Ertcd738 | 101966 | DNA segment, Chr 8, ERATO Doi 738, expressed                                     | -1.11 | 0.70 | 0.91 |
| A_52_P624362 | NM_146110 | Aamp       | 227290 | angio-associated migratory protein                                               | -1.30 | 0.70 | 0.44 |
| A_51_P204295 | NM_011220 | Pts        | 19286  | 6-pyruvoyl-tetrahydropterin synthase                                             | -1.14 | 0.70 | 0.82 |

|              |           |           |        |                                                                                                     |       |      |      |
|--------------|-----------|-----------|--------|-----------------------------------------------------------------------------------------------------|-------|------|------|
| A_51_P167105 | NM_019420 | B3galt4   | 54218  | UDP-Gal:betaGlcNAc beta 1,3-galactosyltransferase, polypeptide 4                                    | -1.10 | 0.70 | 0.91 |
| A_51_P435317 | AK048085  | NA        | NA     | NA                                                                                                  | -1.11 | 0.70 | 0.91 |
| A_51_P346045 | NM_053266 | Gtf2ird2  | 114674 | GTF2I repeat domain containing 2                                                                    | -1.19 | 0.70 | 0.67 |
| A_52_P423357 | NM_145353 | Yipf3     | 28064  | Yip1 domain family, member 3                                                                        | -1.16 | 0.70 | 0.77 |
| A_52_P853177 | NM_011923 | Angptl2   | 26360  | angiopoietin-like 2                                                                                 | -1.15 | 0.70 | 0.77 |
| A_52_P164695 | NM_028950 | Nsun6     | 74455  | NOL1/NOP2/Sun domain family member 6                                                                | -1.17 | 0.70 | 0.70 |
| A_52_P638798 | AK163490  | Mipol1    | 73490  | mirror-image polydactyly gene 1 homolog (human)                                                     | -1.36 | 0.70 | 0.34 |
| A_51_P518470 | NM_025978 | Ttc14     | 67120  | tetratricopeptide repeat domain 14<br>DNA segment, Chr 17, Wayne State University 104,<br>expressed | -1.13 | 0.70 | 0.86 |
| A_51_P123920 | NM_080837 | D17Wsu10  | 28106  | nicalin homolog (zebrafish)                                                                         | -1.13 | 0.70 | 0.37 |
| A_51_P308557 | NM_134009 | Ncln      | 103425 | F-box protein 32                                                                                    | -1.11 | 0.70 | 0.86 |
| A_51_P109369 | NM_026346 | Fbxo32    | 67731  | acid phosphatase 2, lysosomal                                                                       | -1.11 | 0.70 | 0.91 |
| A_51_P516456 | NM_007387 | Acp2      | 11432  | C1D nuclear receptor co-repressor                                                                   | -1.20 | 0.70 | 0.67 |
| A_52_P150495 | NM_020558 | C1d       | 57316  | mediator complex subunit 16                                                                         | -1.15 | 0.70 | 0.82 |
| A_52_P425531 | NM_198107 | Med16     | 216154 | RIKEN cDNA 6330416L07 gene                                                                          | -1.10 | 0.70 | 0.91 |
| A_51_P233308 | NM_176962 | 6330416L0 | 319615 | abhydrolase domain containing 5                                                                     | -1.15 | 0.70 | 0.82 |
| A_51_P407165 | NM_026179 | Abhd5     | 67469  | SET translocation                                                                                   | -1.08 | 0.70 | 1.04 |
| A_52_P619761 | NM_023871 | Set       | 56086  | farnesyltransferase, CAAX box, beta<br>protein phosphatase 1, regulatory (inhibitor) subunit        | -1.10 | 0.70 | 0.91 |
| A_51_P517680 | NM_145927 | Fntb      | 110606 | 12C                                                                                                 | -1.18 | 0.70 | 0.70 |
| A_51_P208410 | AK144691  | Ppp1r12c  | 232807 | phosphodiesterase 4D interacting protein (myomegalin)                                               | -1.35 | 0.70 | 0.37 |
| A_51_P215356 | NM_178080 | Pde4dip   | 83679  | solute carrier family 48 (heme transporter), member 1                                               | -1.10 | 0.70 | 0.91 |
| A_52_P528505 | NM_026353 | Slc48a1   | 67739  | A kinase (PRKA) anchor protein 8                                                                    | -1.13 | 0.70 | 0.86 |
| A_52_P560817 | NM_019774 | Akap8     | 56399  | SID1 transmembrane family, member 2                                                                 | -1.20 | 0.70 | 0.61 |
| A_51_P385961 | NM_172257 | Sidt2     | 214597 | formin binding protein 1                                                                            | -1.07 | 0.70 | 1.04 |
| A_52_P105840 | NM_001038 | Fnbp1     | 14269  | GPN-loop GTPase 2                                                                                   | -1.28 | 0.70 | 0.46 |
| A_51_P241111 | NM_133884 | Gpn2      | 100210 | homeobox B2                                                                                         | -1.29 | 0.70 | 0.46 |
| A_52_P15300  | NM_134032 | Hoxb2     | 103889 | RIKEN cDNA 2610027L16 gene                                                                          | -1.16 | 0.70 | 0.77 |
| A_51_P512765 | NM_026403 | 2610027L1 | 67842  | family with sequence similarity 103, member A1                                                      | -1.25 | 0.70 | 0.55 |
| A_51_P127958 | NM_025997 | Fam103a1  | 67148  |                                                                                                     | -1.25 | 0.70 | 0.53 |

|              |           |         |        |                                                                         |       |      |      |
|--------------|-----------|---------|--------|-------------------------------------------------------------------------|-------|------|------|
| A_51_P366406 | NM_011665 | Ube2i   | 22196  | ubiquitin-conjugating enzyme E2I                                        | -1.31 | 0.70 | 0.44 |
| A_51_P212107 | NM_025680 | Ctnnb1  | 66642  | catenin, beta like 1                                                    | -1.18 | 0.70 | 0.70 |
| A_51_P280158 | NM_030109 | Sf3b2   | 319322 | splicing factor 3b, subunit 2                                           | -1.39 | 0.70 | 0.30 |
| A_51_P401304 | NM_029665 | Ipo11   | 76582  | importin 11                                                             | -1.13 | 0.70 | 0.86 |
| A_51_P345663 | XM_622097 | NA      | NA     | NA                                                                      | -1.09 | 0.70 | 0.97 |
| A_51_P420627 | NM_010922 | Mrpl40  | 18100  | mitochondrial ribosomal protein L40                                     | -1.17 | 0.70 | 0.70 |
| A_52_P522097 | NM_028320 | Adipor1 | 72674  | adiponectin receptor 1                                                  | -1.17 | 0.70 | 0.70 |
| A_51_P118715 | NM_026274 | Rspry1  | 67610  | ring finger and SPRY domain containing 1                                | -1.28 | 0.70 | 0.46 |
| A_52_P221554 | NM_198652 | Hjrp    | 381280 | Holliday junction recognition protein                                   | -1.30 | 0.70 | 0.44 |
| A_51_P283464 | NM_133788 | Icmt    | 57295  | isoprenylcysteine carboxyl methyltransferase                            | -1.46 | 0.70 | 0.21 |
| A_51_P433467 | NM_007965 | Evl     | 14026  | Ena-vasodilator stimulated phosphoprotein                               | -1.22 | 0.70 | 0.58 |
| A_51_P467334 | NM_133728 | Asnsd1  | 70396  | asparagine synthetase domain containing 1                               | -1.29 | 0.70 | 0.46 |
| A_52_P297075 | NM_177171 | Heatr5a | 320487 | HEAT repeat containing 5A                                               | -1.28 | 0.70 | 0.50 |
| A_51_P388984 | NM_026446 | Rgs19   | 56470  | regulator of G-protein signaling 19                                     | -1.13 | 0.70 | 0.86 |
| A_51_P393067 | NM_021392 | Ap4m1   | 11781  | adaptor-related protein complex AP-4, mu 1                              | -1.31 | 0.70 | 0.44 |
| A_51_P176549 | NM_019774 | Akap8   | 56399  | A kinase (PRKA) anchor protein 8                                        | -1.29 | 0.70 | 0.46 |
| A_52_P518233 | AK036277  | Ndr3    | 29812  | N-myc downstream regulated gene 3                                       | -1.20 | 0.70 | 0.61 |
| A_51_P377508 | NM_033218 | Srebf2  | 20788  | sterol regulatory element binding factor 2                              | -1.16 | 0.70 | 0.77 |
| A_51_P242265 | NM_009950 | Cradd   | 12905  | CASP2 and RIPK1 domain containing adaptor with death domain             | -1.19 | 0.70 | 0.67 |
| A_51_P355360 | NM_010589 | Jak3    | 16453  | Janus kinase 3                                                          | -1.30 | 0.70 | 0.44 |
| A_51_P408082 | NM_009692 | Apoa1   | 11806  | apolipoprotein A-I                                                      | -1.29 | 0.70 | 0.46 |
| A_51_P160567 | NM_021519 | Edf1    | 59022  | endothelial differentiation-related factor 1                            | -1.42 | 0.70 | 0.27 |
| A_51_P506128 | NM_175247 | Zfp28   | 22690  | zinc finger protein 28                                                  | -1.30 | 0.70 | 0.44 |
| A_52_P462432 | NM_017477 | Copg    | 54161  | coatamer protein complex, subunit gamma                                 | -1.27 | 0.70 | 0.50 |
| A_52_P657435 | NM_008950 | Psmc5   | 19184  | protease (prosome, macropain) 26S subunit, ATPase 5                     | -1.24 | 0.70 | 0.55 |
| A_52_P562147 | NA        | NA      | NA     | NA                                                                      | -1.15 | 0.70 | 0.82 |
| A_51_P184321 | NM_007926 | Aimp1   | 13722  | aminoacyl tRNA synthetase complex-interacting multifunctional protein 1 | -1.19 | 0.70 | 0.67 |
| A_52_P268104 | NA        | NA      | NA     | NA                                                                      | -1.26 | 0.70 | 0.53 |
| A_52_P428521 | NM_008001 | Fgd1    | 14163  | FYVE, RhoGEF and PH domain containing 1                                 | -1.31 | 0.70 | 0.44 |
| A_51_P441837 | NM_026837 | Tmem53  | 68777  | transmembrane protein 53                                                | -1.27 | 0.70 | 0.50 |
| A_52_P536735 | NM_016677 | Hpcal1  | 53602  | hippocalcin-like 1                                                      | -1.34 | 0.70 | 0.37 |

|              |           |           |         |                                                                                                         |       |      |      |
|--------------|-----------|-----------|---------|---------------------------------------------------------------------------------------------------------|-------|------|------|
| A_52_P218590 | NA        | NA        | NA      | NA                                                                                                      | -1.25 | 0.70 | 0.53 |
| A_51_P343309 | NM_009908 | Cmas      | 12764   | cytidine monophospho-N-acetylneuraminic acid synthetase                                                 | -1.11 | 0.70 | 0.91 |
| A_52_P469277 | AF087578  | Slc1a1    | 20510   | solute carrier family 1 (neuronal/epithelial high affinity glutamate transporter, system Xag), member 1 | -1.40 | 0.70 | 0.28 |
| A_52_P258991 | AK145759  | Cdk7      | 12572   | cyclin-dependent kinase 7                                                                               | -1.27 | 0.70 | 0.50 |
| A_51_P460793 | BC056383  | Luc7l2    | 192196  | LUC7-like 2 ( <i>S. cerevisiae</i> )                                                                    | -1.17 | 0.70 | 0.70 |
| A_51_P393862 | NM_025716 | Spryd4    | 66701   | SPRY domain containing 4                                                                                | -1.23 | 0.70 | 0.58 |
| A_51_P151775 | NM_178719 | Smcr7l    | 239555  | Smith-Magenis syndrome chromosome region, candidate 7-like (human)                                      | -1.21 | 0.70 | 0.61 |
| A_51_P514922 | BC021475  | 2610301G1 | 1219158 | RIKEN cDNA 2610301G19 gene                                                                              | -1.08 | 0.70 | 1.04 |
| A_51_P101635 | NM_019719 | Stub1     | 56424   | STIP1 homology and U-Box containing protein 1                                                           | -1.43 | 0.70 | 0.24 |
| A_51_P462972 | NM_144535 | Mudeng    | 74385   | MU-2/AP1M2 domain containing, death-inducing                                                            | -1.40 | 0.70 | 0.28 |
| A_51_P504538 | NM_007919 | Cela2a    | 13706   | chymotrypsin-like elastase family, member 2A                                                            | -1.10 | 0.70 | 0.97 |
| A_51_P429372 | NM_029669 | Dnajc18   | 76594   | Dnal (Hsp40) homolog, subfamily C, member 18                                                            | -1.07 | 0.70 | 1.04 |
| A_51_P139021 | NM_017393 | Clpp      | 53895   | caseinolytic peptidase, ATP-dependent, proteolytic subunit homolog ( <i>E. coli</i> )                   | -1.30 | 0.70 | 0.44 |
| A_52_P463143 | NM_016742 | Cdc37     | 12539   | cell division cycle 37 homolog ( <i>S. cerevisiae</i> )                                                 | -1.35 | 0.70 | 0.34 |
| A_51_P169032 | NM_025615 | 2810004N2 | 66523   | RIKEN cDNA 2810004N23 gene                                                                              | -1.14 | 0.70 | 0.82 |
| A_52_P325574 | NM_024225 | Snx5      | 69178   | sorting nexin 5                                                                                         | -1.08 | 0.70 | 1.04 |
| A_51_P247591 | NM_146110 | Aamp      | 227290  | angio-associated migratory protein                                                                      | -1.24 | 0.70 | 0.55 |
| A_52_P279319 | NM_011840 | Map2k5    | 23938   | mitogen-activated protein kinase kinase 5                                                               | -1.10 | 0.70 | 0.97 |
| A_51_P426724 | NM_001037 | RP23-233B | 622665  | coiled-coil domain containing 17                                                                        | -1.22 | 0.70 | 0.58 |
| A_51_P203360 | NM_177262 | Pkn1      | 320795  | protein kinase N1                                                                                       | -1.12 | 0.70 | 0.86 |
| A_51_P262533 | NM_028868 | Cxxc1     | 74322   | CXXC finger 1 (PHD domain)                                                                              | -1.22 | 0.70 | 0.58 |
| A_52_P585509 | AK040881  | Oxr1      | 170719  | oxidation resistance 1                                                                                  | -1.47 | 0.70 | 0.21 |
| A_52_P869802 | NM_028597 | Thoc3     | 73666   | THO complex 3                                                                                           | -1.15 | 0.70 | 0.82 |
| A_51_P326086 | NM_011293 | Polr2j    | 20022   | polymerase (RNA) II (DNA directed) polypeptide J                                                        | -1.22 | 0.70 | 0.58 |
| A_51_P207849 | NM_026975 | Bola1     | 69168   | bola-like 1 ( <i>E. coli</i> )                                                                          | -1.23 | 0.70 | 0.55 |
| A_52_P575771 | NM_026182 | Mtfr1     | 67472   | mitochondrial fission regulator 1                                                                       | -1.34 | 0.70 | 0.37 |
| A_52_P112864 | NM_009359 | Tex9      | 21778   | testis expressed gene 9                                                                                 | -1.40 | 0.70 | 0.28 |

|              |           |           |        |                                                                                              |       |      |      |
|--------------|-----------|-----------|--------|----------------------------------------------------------------------------------------------|-------|------|------|
| A_52_P445828 | NM_013853 | Abcf2     | 27407  | ATP-binding cassette, sub-family F (GCN20), member 2                                         | -1.24 | 0.70 | 0.55 |
| A_52_P292651 | NM_021288 | Tyms      | 22171  | thymidylate synthase                                                                         | -1.22 | 0.70 | 0.61 |
| A_52_P630646 | NM_026654 | Toe1      | 68276  | target of EGR1, member 1 (nuclear)                                                           | -1.18 | 0.70 | 0.70 |
| A_52_P527931 | XM_889480 | Ano8      | 382014 | anoctamin 8                                                                                  | -1.08 | 0.70 | 1.04 |
| A_52_P444801 | NM_203319 | Dhx37     | 208144 | DEAH (Asp-Glu-Ala-His) box polypeptide 37                                                    | -1.21 | 0.70 | 0.61 |
| A_51_P405227 | NM_026012 | Nradd     | 67169  | neurotrophin receptor associated death domain                                                | -1.19 | 0.70 | 0.67 |
| A_51_P201730 | NM_011900 | Mpdu1     | 24070  | mannose-P-dolichol utilization defect 1                                                      | -1.34 | 0.70 | 0.37 |
| A_52_P363920 | NM_134101 | Psmd2     | 21762  | proteasome (prosome, macropain) 26S subunit, non-ATPase, 2                                   | -1.11 | 0.70 | 0.91 |
| A_51_P120636 | NM_007891 | E2f1      | 13555  | E2F transcription factor 1                                                                   | -1.17 | 0.70 | 0.77 |
| A_51_P123017 | NM_011818 | Gmcl1     | 23885  | germ cell-less homolog 1 (Drosophila)                                                        | -1.24 | 0.70 | 0.55 |
| A_51_P495492 | NM_009294 | Stx4a     | 20909  | syntaxin 4A (placental)                                                                      | -1.29 | 0.70 | 0.46 |
| A_51_P503654 | NM_178577 | Tmem205   | 235043 | transmembrane protein 205                                                                    | -1.14 | 0.70 | 0.82 |
| A_51_P508402 | NM_177282 | Mical2    | 320878 | microtubule associated monooxygenase, calponin and LIM domain containing 2                   | -1.12 | 0.70 | 0.86 |
| A_51_P362399 | NM_176953 | Lig4      | 319583 | ligase IV, DNA, ATP-dependent                                                                | -1.10 | 0.70 | 0.97 |
| A_52_P422675 | BC090960  | Hook3     | 320191 | hook homolog 3 (Drosophila)                                                                  | -1.42 | 0.70 | 0.27 |
| A_51_P236287 | AK087504  | Safb      | 224903 | scaffold attachment factor B                                                                 | -1.15 | 0.70 | 0.82 |
| A_52_P684214 | NM_023126 | Rab8a     | 17274  | RAB8A, member RAS oncogene family                                                            | -1.40 | 0.70 | 0.28 |
| A_52_P364970 | NM_181391 | Chchd7    | 66433  | coiled-coil-helix-coiled-coil-helix domain containing 7                                      | -1.16 | 0.70 | 0.77 |
| A_51_P108190 | NM_022891 | Rpl23     | 65019  | ribosomal protein L23                                                                        | -1.29 | 0.70 | 0.46 |
| A_52_P271031 | NM_010787 | Mea1      | 17256  | male enhanced antigen 1                                                                      | -1.12 | 0.70 | 0.86 |
| A_51_P309618 | NM_025904 | 1600012F0 | 67008  | RIKEN cDNA 1600012F09 gene                                                                   | -1.25 | 0.70 | 0.53 |
| A_52_P35960  | NM_009983 | Ctsd      | 13033  | cathepsin D                                                                                  | -1.15 | 0.70 | 0.77 |
| A_51_P362903 | NM_025485 | Mrps22    | 64655  | mitochondrial ribosomal protein S22                                                          | -1.07 | 0.69 | 1.04 |
| A_52_P143982 | NM_134159 | Il17rc    | 171095 | interleukin 17 receptor C                                                                    | -1.32 | 0.69 | 0.40 |
| A_51_P444335 | NM_019800 | Acp6      | 66659  | acid phosphatase 6, lysophosphatidic platelet-activating factor acetylhydrolase, isoform 1b, | -1.22 | 0.69 | 0.58 |
| A_51_P291388 | NM_013625 | Pafah1b1  | 18472  | subunit 1                                                                                    | -1.22 | 0.69 | 0.58 |
| A_52_P195955 | NM_028387 | MacroD2   | 72899  | MACRO domain containing 2                                                                    | -1.17 | 0.69 | 0.70 |
| A_51_P166258 | NM_133195 | Brunol4   | 108013 | bruno-like 4, RNA binding protein (Drosophila)                                               | -1.18 | 0.69 | 0.67 |

|              |                     |           |        |                                                                            |       |      |      |
|--------------|---------------------|-----------|--------|----------------------------------------------------------------------------|-------|------|------|
| A_51_P143737 | NM_021526           | Psmd14    | 59029  | proteasome (prosome, macropain) 26S subunit, non-ATPase, 14                | -1.35 | 0.69 | 0.34 |
| A_52_P403764 | NM_029432           | 4930402H2 | 228602 | RIKEN cDNA 4930402H24 gene                                                 | -1.09 | 0.69 | 0.97 |
| A_52_P299684 | NM_172465           | Zdhhc9    | 208884 | zinc finger, DHHC domain containing 9                                      | -1.14 | 0.69 | 0.82 |
| A_52_P430283 | BC053401            | Heatr2    | 433956 | HEAT repeat containing 2                                                   | -1.30 | 0.69 | 0.44 |
| A_52_P117821 | NM_025981           | NA        | NA     | NA                                                                         | -1.22 | 0.69 | 0.58 |
| A_52_P440445 | AK087773            | Polr1a    | 20019  | polymerase (RNA) I polypeptide A                                           | -1.26 | 0.69 | 0.53 |
| A_52_P598245 | NM_009547           | Zfp161    | 22666  | zinc finger protein 161                                                    | -1.13 | 0.69 | 0.86 |
| A_51_P226184 | AK040977            | Trove2    | 20822  | TROVE domain family, member 2                                              | -1.21 | 0.69 | 0.61 |
| A_51_P169880 | NM_133759           | Zbtb3     | 75291  | zinc finger and BTB domain containing 3                                    | -1.42 | 0.69 | 0.27 |
| A_51_P102943 | NM_008296           | Hsf1      | 15499  | heat shock factor 1                                                        | -1.11 | 0.69 | 0.91 |
| A_52_P108321 | NM_133744           | Ccdc71    | 72454  | coiled-coil domain containing 71                                           | -1.20 | 0.69 | 0.67 |
| A_52_P304028 | NM_053158           | Mrpl1     | 94061  | mitochondrial ribosomal protein L1                                         | -1.37 | 0.69 | 0.33 |
| A_52_P627833 | NM_008588           | Mesp1     | 17292  | mesoderm posterior 1                                                       | -1.35 | 0.69 | 0.34 |
| A_51_P423039 | NM_145406           | Slc10a3   | 214601 | solute carrier family 10 (sodium/bile acid cotransporter family), member 3 | -1.18 | 0.69 | 0.70 |
| A_52_P348031 | NM_021889           | Syt9      | 60510  | synaptotagmin IX                                                           | -1.32 | 0.69 | 0.40 |
| A_51_P404077 | NM_020510           | Fzd2      | 57265  | frizzled homolog 2 (Drosophila)                                            | -1.14 | 0.69 | 0.82 |
| A_52_P376337 | AK046436            | Acn9      | 71238  | ACN9 homolog (S. cerevisiae)                                               | -1.24 | 0.69 | 0.55 |
| A_52_P674578 | NM_178645           | Blmh      | 104184 | bleomycin hydrolase                                                        | -1.19 | 0.69 | 0.67 |
| A_51_P516615 | NM_026684           | Ndufb10   | 68342  | NADH dehydrogenase (ubiquinone) 1 beta subcomplex, 10                      | -1.28 | 0.69 | 0.50 |
| A_51_P292736 | NM_007654           | Cd72      | 12517  | CD72 antigen                                                               | -1.07 | 0.69 | 1.04 |
| A_52_P92246  | AK078408            | Klhdc2    | 69554  | kelch domain containing 2                                                  | -1.12 | 0.69 | 0.86 |
| A_51_P225889 | NM_011585           | Tia1      | 21841  | cytotoxic granule-associated RNA binding protein 1                         | -1.38 | 0.69 | 0.30 |
| A_52_P160209 | NM_139302           | Sh3glb2   | 227700 | SH3-domain GRB2-like endophilin B2                                         | -1.37 | 0.69 | 0.33 |
| A_52_P10254  | NM_011874           | Psmc4     | 23996  | proteasome (prosome, macropain) 26S subunit, ATPase, 4                     | -1.20 | 0.69 | 0.67 |
| A_52_P193429 | NM_007496           | Zfhx3     | 11906  | zinc finger homeobox 3                                                     | -1.19 | 0.69 | 0.67 |
| A_51_P346884 | NM_025665           | Snrnp27   | 66618  | small nuclear ribonucleoprotein 27 (U4/U6.U5)                              | -1.21 | 0.69 | 0.61 |
| A_52_P94521  | NM_001001:2510009E0 | 72190     | 72190  | RIKEN cDNA 2510009E07 gene                                                 | -1.27 | 0.69 | 0.50 |
| A_52_P533065 | NM_144509           | Arl6ip4   | 65105  | ADP-ribosylation factor-like 6 interacting protein 4                       | -1.35 | 0.69 | 0.34 |

|               |           |          |        |                                                                                                   |       |      |      |
|---------------|-----------|----------|--------|---------------------------------------------------------------------------------------------------|-------|------|------|
| A_52_P50376   | NM_011602 | Tln1     | 21894  | talin 1                                                                                           | -1.26 | 0.69 | 0.53 |
| A_52_P327927  | NA        | NA       | NA     | NA                                                                                                | -1.20 | 0.69 | 0.61 |
| A_51_P290170  | NM_019979 | Selk     | 80795  | selenoprotein K                                                                                   | -1.18 | 0.69 | 0.70 |
| A_51_P133369  | NM_016717 | Scly     | 50880  | selenocysteine lyase                                                                              | -1.21 | 0.69 | 0.61 |
| A_52_P2659    | NA        | NA       | NA     | NA                                                                                                | -1.20 | 0.69 | 0.67 |
| A_51_P380685  | NM_023231 | Stoml2   | 66592  | stomatin (Epb7.2)-like 2                                                                          | -1.46 | 0.69 | 0.21 |
| A_52_P398334  | NM_177616 | Ccdc157  | 216516 | coiled-coil domain containing 157                                                                 | -1.32 | 0.69 | 0.40 |
| A_51_P329251  | NM_025366 | Chchd1   | 66121  | coiled-coil-helix-coiled-coil-helix domain containing 1                                           | -1.14 | 0.69 | 0.82 |
| A_51_P125205  | NM_007472 | Aqp1     | 11826  | aquaporin 1                                                                                       | -1.15 | 0.69 | 0.82 |
| A_52_P482830  | NM_025580 | Pnkd     | 56695  | paroxysmal nonkinesinogenic dyskinesia                                                            | -1.41 | 0.69 | 0.27 |
| A_51_P121724  | XM_001001 | NA       | NA     | NA                                                                                                | -1.34 | 0.69 | 0.37 |
| A_52_P358860  | NM_008180 | Gss      | 14854  | glutathione synthetase                                                                            | -1.34 | 0.69 | 0.37 |
| A_51_P273679  | NM_028772 | Dmgdh    | 74129  | dimethylglycine dehydrogenase precursor                                                           | -1.39 | 0.69 | 0.28 |
| A_52_P313789  | AF369981  | Ppm1a    | 19042  | protein phosphatase 1A, magnesium dependent, alpha isoform                                        | -1.36 | 0.69 | 0.33 |
| A_51_P110341  | NM_170727 | Scgb3a1  | 68662  | secretoglobin, family 3A, member 1                                                                | -1.14 | 0.69 | 0.82 |
| A_52_P64601   | NM_028722 | Msl1     | 74026  | male-specific lethal 1 homolog (Drosophila)                                                       | -1.29 | 0.69 | 0.46 |
| A_52_P612537  | NM_178750 | Ss18l1   | 269397 | synovial sarcoma translocation gene on chromosome 18-like 1                                       | -1.18 | 0.69 | 0.70 |
| A_52_P560792  | NM_026542 | Slc25a39 | 68066  | solute carrier family 25, member 39                                                               | -1.31 | 0.69 | 0.44 |
| A_51_P138141  | NM_021421 | Angel2   | 52477  | angel homolog 2 (Drosophila)                                                                      | -1.11 | 0.69 | 0.91 |
| A_51_P502132  | NM_011985 | Mmp23    | 26561  | matrix metalloproteinase 23                                                                       | -1.32 | 0.69 | 0.40 |
| A_51_P357561  | NM_026791 | Fbxw9    | 68628  | F-box and WD-40 domain protein 9                                                                  | -1.20 | 0.69 | 0.61 |
| A_52_P668030  | AK156814  | Mrpl44   | 69163  | mitochondrial ribosomal protein L44                                                               | -1.29 | 0.69 | 0.46 |
| A_52_P681513  | AK018386  | NA       | NA     | NA                                                                                                | -1.21 | 0.69 | 0.61 |
| A_51_P425047  | NM_026838 | Srpx2    | 68792  | sushi-repeat-containing protein, X-linked 2                                                       | -1.14 | 0.69 | 0.82 |
| A_51_P397468  | NM_016759 | Rundc3a  | 51799  | RUN domain containing 3A                                                                          | -1.19 | 0.69 | 0.67 |
| A_51_P502184  | NM_009211 | Smarcc1  | 20588  | SWI/SNF related, matrix associated, actin dependent regulator of chromatin, subfamily c, member 1 | -1.29 | 0.69 | 0.46 |
| A_51_P177984  | NM_207217 | Itfg3    | 106581 | integrin alpha FG-GAP repeat containing 3                                                         | -1.23 | 0.69 | 0.58 |
| A_52_P1140740 | AK089858  | NA       | NA     | NA                                                                                                | -1.11 | 0.69 | 0.91 |
| A_52_P609200  | NM_012032 | Serinc3  | 26943  | serine incorporator 3                                                                             | -1.15 | 0.69 | 0.82 |

|              |           |                |        |                                                                            |       |      |      |
|--------------|-----------|----------------|--------|----------------------------------------------------------------------------|-------|------|------|
| A_52_P686091 | NM_011078 | Phf2           | 18676  | PHD finger protein 2                                                       | -1.14 | 0.69 | 0.82 |
| A_51_P180505 | AK083797  | NA             | NA     | NA                                                                         | -1.38 | 0.69 | 0.30 |
| A_52_P270490 | NM_001003 | Epb4.1l1       | 13821  | erythrocyte protein band 4.1-like 1                                        | -1.35 | 0.69 | 0.34 |
| A_51_P338600 | NM_025387 | Tmem14c        | 66154  | transmembrane protein 14C                                                  | -1.21 | 0.69 | 0.61 |
| A_52_P316824 | AK009255  | Ttll5          | 320244 | tubulin tyrosine ligase-like family, member 5                              | -1.15 | 0.69 | 0.82 |
| A_51_P427444 | NM_017472 | Snx3           | 54198  | sorting nexin 3                                                            | -1.23 | 0.69 | 0.58 |
| A_52_P97192  | NM_026170 | Ergic1         | 67458  | endoplasmic reticulum-golgi intermediate compartment (ERGIC) 1             | -1.09 | 0.69 | 0.97 |
| A_52_P544885 | NM_011459 | Serpinb8       | 20725  | serine (or cysteine) peptidase inhibitor, clade B, member 8                | -1.23 | 0.69 | 0.58 |
| A_52_P15128  | XM_001002 | Wdr81          | 192652 | WD repeat domain 81                                                        | -1.17 | 0.69 | 0.70 |
| A_52_P121    | NM_028091 | Osgpl1         | 72085  | O-sialoglycoprotein endopeptidase-like 1                                   | -1.44 | 0.69 | 0.24 |
| A_51_P339540 | NM_009876 | Cdkn1c         | 12577  | cyclin-dependent kinase inhibitor 1C (P57)                                 | -1.11 | 0.69 | 0.91 |
| A_51_P243435 | NM_010475 | Hsd17b1        | 15485  | hydroxysteroid (17-beta) dehydrogenase 1                                   | -1.21 | 0.69 | 0.61 |
| A_51_P120717 | NM_010721 | Lmnb1          | 16906  | lamin B1                                                                   | -1.29 | 0.69 | 0.46 |
| A_51_P309184 | NM_008993 | Pxmp2          | 19301  | peroxisomal membrane protein 2                                             | -1.14 | 0.69 | 0.82 |
| A_51_P367298 | BU554808  | NA             | NA     | NA                                                                         | -1.20 | 0.69 | 0.61 |
| A_51_P209401 | BC062811  | 1810020D166273 |        | RIKEN cDNA 1810020D17 gene                                                 | -1.08 | 0.69 | 1.04 |
| A_51_P261737 | NM_021517 | Pdzk1          | 59020  | PDZ domain containing 1                                                    | -1.26 | 0.69 | 0.53 |
| A_51_P133713 | NM_173189 | Mcph1          | 244329 | microcephaly, primary autosomal recessive 1                                | -1.31 | 0.69 | 0.44 |
| A_52_P99470  | NM_001013 | 1110054O05     | 66209  | RIKEN cDNA 1110054O05 gene                                                 | -1.33 | 0.69 | 0.37 |
| A_51_P278266 | NM_146020 | Gltpd2         | 216871 | glycolipid transfer protein domain containing 2                            | -1.32 | 0.69 | 0.40 |
| A_51_P256706 | NM_008949 | Psmc3ip        | 19183  | proteasome (prosome, macropain) 26S subunit, ATPase 3, interacting protein | -1.30 | 0.69 | 0.44 |
| A_52_P549815 | XM_621314 | Dsp            | 109620 | desmoplakin                                                                | -1.38 | 0.69 | 0.30 |
| A_52_P332898 | BB554159  | NA             | NA     | NA                                                                         | -1.20 | 0.69 | 0.67 |
| A_51_P312997 | NM_012017 | Zfp346         | 26919  | zinc finger protein 346                                                    | -1.25 | 0.69 | 0.53 |
| A_51_P186887 | NM_080562 | Ubox5          | 140629 | U box domain containing 5                                                  | -1.24 | 0.69 | 0.55 |
| A_52_P346556 | AK038627  | NA             | NA     | NA                                                                         | -1.08 | 0.69 | 1.04 |
| A_52_P452076 | NA        | NA             | NA     | NA                                                                         | -1.29 | 0.69 | 0.46 |
| A_52_P148184 | NM_028166 | 1600014C172244 |        | RIKEN cDNA 1600014C10 gene                                                 | -1.10 | 0.69 | 0.97 |
| A_51_P212713 | NM_023684 | Lime1          | 72699  | Lck interacting transmembrane adaptor 1                                    | -1.10 | 0.69 | 0.97 |



|              |                     |        |  |                                                                |       |      |      |
|--------------|---------------------|--------|--|----------------------------------------------------------------|-------|------|------|
|              |                     |        |  | a disintegrin-like and metallopeptidase (reprolysin type)      |       |      |      |
| A_51_P311038 | NM_001024: Adamts15 | 235130 |  | with thrombospondin type 1 motif, 15                           | -1.36 | 0.69 | 0.33 |
| A_51_P304561 | AK013640 NA         | NA     |  | NA                                                             | -1.41 | 0.69 | 0.27 |
| A_52_P311708 | NM_026936 Oxa1l     | 69089  |  | oxidase assembly 1-like                                        | -1.24 | 0.69 | 0.55 |
| A_52_P17194  | NM_001033: Med22    | 20933  |  | mediator complex subunit 22                                    | -1.33 | 0.69 | 0.37 |
| A_51_P481569 | NM_028074 Ddx42     | 72047  |  | DEAD (Asp-Glu-Ala-Asp) box polypeptide 42                      | -1.08 | 0.69 | 1.04 |
| A_51_P513530 | NM_017407 Spag5     | 54141  |  | sperm associated antigen 5                                     | -1.27 | 0.69 | 0.50 |
| A_51_P368210 | NM_145981 Phyhip    | 105653 |  | phytanoyl-CoA hydroxylase interacting protein                  | -1.10 | 0.69 | 0.91 |
| A_51_P177583 | NM_028364 Puf60     | 67959  |  | poly-U binding splicing factor 60                              | -1.41 | 0.69 | 0.27 |
| A_51_P242608 | NM_175560 Zfp747    | 269997 |  | zinc finger protein 747                                        | -1.34 | 0.69 | 0.37 |
| A_51_P433399 | NM_139141 Zfp192    | 93681  |  | zinc finger protein 192                                        | -1.54 | 0.69 | 0.17 |
| A_51_P257832 | NM_009479 Uros      | 22276  |  | uroporphyrinogen III synthase                                  | -1.11 | 0.69 | 0.91 |
| A_51_P201818 | BC048938 2810422J0: | 75620  |  | RIKEN cDNA 2810422J05 gene                                     | -1.15 | 0.69 | 0.77 |
| A_52_P324694 | NM_025395 Chchd5    | 66170  |  | coiled-coil-helix-coiled-coil-helix domain containing 5        | -1.09 | 0.69 | 0.97 |
| A_52_P324767 | NM_001033: Tmed8    | 382620 |  | transmembrane emp24 domain containing 8                        | -1.35 | 0.69 | 0.34 |
| A_52_P579519 | NM_027495 Tmem144   | 70652  |  | transmembrane protein 144                                      | -1.33 | 0.69 | 0.37 |
| A_51_P401730 | NM_175153 2010321M: | 69882  |  | RIKEN cDNA 2010321M09 gene                                     | -1.23 | 0.69 | 0.58 |
| A_51_P251487 | NM_025719 Nkapl     | 66707  |  | NFKB activating protein-like                                   | -1.20 | 0.69 | 0.67 |
| A_51_P494567 | NM_144885 BC005624  | 227707 |  | cDNA sequence BC005624                                         | -1.35 | 0.69 | 0.34 |
| A_51_P436386 | BC006738 Qrich1     | 69232  |  | glutamine-rich 1                                               | -1.08 | 0.69 | 1.04 |
| A_51_P229911 | NM_080435 Adcy4     | 104110 |  | adenylate cyclase 4                                            | -1.48 | 0.69 | 0.20 |
| A_52_P641341 | NM_028428 Fut11     | 73068  |  | fucosyltransferase 11                                          | -1.12 | 0.69 | 0.86 |
| A_51_P442655 | NM_026191 Dhx40     | 67487  |  | DEAH (Asp-Glu-Ala-His) box polypeptide 40                      | -1.26 | 0.69 | 0.53 |
| A_51_P406077 | NM_025363 Fmc1      | 66117  |  | formation of mitochondrial complexes 1 homolog (S. cerevisiae) | -1.28 | 0.69 | 0.46 |
| A_51_P290931 | AK019450 Ptpnb      | 19263  |  | protein tyrosine phosphatase, receptor type, B                 | -1.19 | 0.69 | 0.67 |
| A_51_P502888 | NM_010881 Ncoa1     | 17977  |  | nuclear receptor coactivator 1                                 | -1.32 | 0.69 | 0.40 |
| A_51_P446865 | NM_011602 Tln1      | 21894  |  | talin 1                                                        | -1.30 | 0.69 | 0.44 |
| A_52_P623738 | NM_001025: Otud7b   | 229603 |  | OTU domain containing 7B                                       | -1.20 | 0.69 | 0.67 |
| A_52_P470451 | AK077724 Mdh1       | 17449  |  | malate dehydrogenase 1, NAD (soluble)                          | -1.16 | 0.69 | 0.77 |
| A_51_P128147 | BC036138 Chmp1a     | 234852 |  | chromatin modifying protein 1A                                 | -1.41 | 0.69 | 0.28 |
| A_51_P425490 | NM_053014 Agpat3    | 28169  |  | 1-acylglycerol-3-phosphate O-acyltransferase 3                 | -1.40 | 0.68 | 0.28 |

|              |           |           |        |                                                                        |       |      |      |
|--------------|-----------|-----------|--------|------------------------------------------------------------------------|-------|------|------|
| A_52_P682099 | BC058650  | Fam149b   | 105428 | family with sequence similarity 149, member B                          | -1.48 | 0.68 | 0.20 |
| A_52_P269461 | XM_356065 | Ddhd2     | 72108  | DDHD domain containing 2                                               | -1.49 | 0.68 | 0.20 |
| A_52_P271200 | NM_029296 | 1700001C1 | 75462  | RIKEN cDNA 1700001C19 gene                                             | -1.13 | 0.68 | 0.86 |
| A_52_P589321 | AK169742  | NA        | NA     | NA                                                                     | -1.14 | 0.68 | 0.82 |
| A_52_P149835 | NM_008363 | Irak1     | 16179  | interleukin-1 receptor-associated kinase 1                             | -1.32 | 0.68 | 0.40 |
| A_51_P479933 | NM_024176 | Drp1      | 66556  | Dr1 associated protein 1 (negative cofactor 2 alpha)                   | -1.13 | 0.68 | 0.86 |
| A_52_P509906 | NM_026298 | Ift172    | 67661  | intraflagellar transport 172 homolog (Chlamydomonas)                   | -1.23 | 0.68 | 0.58 |
| A_52_P311725 | AJ426449  | Spink5    | 72432  | serine peptidase inhibitor, Kazal type 5                               | -1.19 | 0.68 | 0.67 |
| A_52_P504068 | NM_153599 | Cdk8      | 264064 | cyclin-dependent kinase 8                                              | -1.35 | 0.68 | 0.34 |
| A_52_P630098 | NA        | NA        | NA     | NA                                                                     | -1.38 | 0.68 | 0.30 |
| A_52_P222669 | AK013859  | Tmem186   | 66690  | transmembrane protein 186                                              | -1.46 | 0.68 | 0.21 |
| A_52_P520429 | NM_001024 | Gm14325   | 329575 | predicted gene 14325                                                   | -1.14 | 0.68 | 0.82 |
| A_52_P483269 | AK029299  | Slc22a15  | 242126 | solute carrier family 22 (organic anion/cation transporter), member 15 | -1.19 | 0.68 | 0.67 |
| A_52_P421149 | XM_204015 | Rere      | 68703  | arginine glutamic acid dipeptide (RE) repeats                          | -1.37 | 0.68 | 0.33 |
| A_51_P145631 | AK158571  | Svip      | 75744  | small VCP/p97-interacting protein                                      | -1.33 | 0.68 | 0.37 |
| A_51_P483311 | NM_183170 | Mpv17l2   | 234384 | MPV17 mitochondrial membrane protein-like 2                            | -1.43 | 0.68 | 0.24 |
| A_51_P256003 | NM_009551 | Zfand5    | 22682  | zinc finger, AN1-type domain 5                                         | -1.31 | 0.68 | 0.44 |
| A_51_P230904 | NM_019877 | Copz2     | 56358  | coatamer protein complex, subunit zeta 2                               | -1.13 | 0.68 | 0.86 |
| A_52_P122054 | NM_016843 | Atxn10    | 54138  | ataxin 10                                                              | -1.13 | 0.68 | 0.86 |
| A_51_P193379 | NM_001040 | Mtmr7     | 54384  | myotubularin related protein 7                                         | -1.12 | 0.68 | 0.86 |
| A_52_P541833 | NM_177876 | Vps37b    | 330192 | vacuolar protein sorting 37B (yeast)                                   | -1.13 | 0.68 | 0.86 |
| A_51_P278427 | NM_146051 | 3830406C1 | 218734 | RIKEN cDNA 3830406C13 gene                                             | -1.47 | 0.68 | 0.21 |
| A_51_P394354 | NM_027464 | 5730469M  | 70564  | RIKEN cDNA 5730469M10 gene                                             | -1.18 | 0.68 | 0.67 |
| A_52_P378157 | NM_148949 | Tdpoz1    | 207213 | TD and POZ domain containing 1                                         | -1.34 | 0.68 | 0.37 |
| A_51_P249118 | NM_008830 | Abcb4     | 18670  | ATP-binding cassette, sub-family B (MDR/TAP), member 4                 | -1.09 | 0.68 | 0.97 |
| A_52_P415351 | NM_011650 | Tsn       | 22099  | translin                                                               | -1.35 | 0.68 | 0.34 |
| A_51_P503953 | NM_027993 | 2310028H2 | 71901  | RIKEN cDNA 2310028H24 gene                                             | -1.10 | 0.68 | 0.91 |
| A_52_P666268 | NM_001039 | D11Bwg05  | 52897  | DNA segment, Chr 11, Brigham & Women's Genetics 0517 expressed         | -1.08 | 0.68 | 1.04 |
| A_51_P314323 | NM_030083 | Lsmd1     | 78304  | LSM domain containing 1                                                | -1.17 | 0.68 | 0.70 |

|               |           |           |        |                                                       |       |      |      |
|---------------|-----------|-----------|--------|-------------------------------------------------------|-------|------|------|
| A_52_P348038  | NM_016663 | Syt3      | 20981  | synaptotagmin III                                     | -1.30 | 0.68 | 0.44 |
| A_51_P191511  | NM_019460 | Sfmbt1    | 54650  | Scm-like with four mbt domains 1                      | -1.18 | 0.68 | 0.70 |
| A_52_P301591  | XM_887283 | NA        | NA     | NA                                                    | -1.19 | 0.68 | 0.67 |
| A_52_P1149693 | AK162627  | A930006KC | 78433  | RIKEN cDNA A930006K02 gene                            | -1.22 | 0.68 | 0.58 |
| A_52_P156485  | NM_026241 | Ankrd39   | 109346 | ankyrin repeat domain 39                              | -1.12 | 0.68 | 0.86 |
| A_51_P450750  | BC098210  | NA        | NA     | NA                                                    | -1.28 | 0.68 | 0.50 |
| A_52_P333691  | NM_001001 | Rtel1     | 269400 | regulator of telomere elongation helicase 1           | -1.12 | 0.68 | 0.86 |
| A_52_P319149  | NM_027159 | Ccdc115   | 69668  | coiled-coil domain containing 115                     | -1.22 | 0.68 | 0.58 |
| A_51_P206518  | NM_019542 | Nagk      | 56174  | N-acetylglucosamine kinase                            | -1.41 | 0.68 | 0.27 |
| A_51_P398596  | NM_144812 | Tnrc6b    | 213988 | trinucleotide repeat containing 6b                    | -1.23 | 0.68 | 0.58 |
| A_51_P114551  | NM_028754 | 0610037L1 | 74098  | RIKEN cDNA 0610037L13 gene                            | -1.26 | 0.68 | 0.53 |
| A_52_P208727  | BC050924  | Zmym4     | 67785  | zinc finger, MYM-type 4                               | -1.11 | 0.68 | 0.91 |
| A_52_P209101  | NM_009594 | Abl1      | 11350  | c-abl oncogene 1, receptor tyrosine kinase            | -1.29 | 0.68 | 0.46 |
| A_52_P582609  | NM_053187 | Gopc      | 94221  | golgi associated PDZ and coiled-coil motif containing | -1.31 | 0.68 | 0.44 |
| A_52_P597608  | NM_011494 | Stk16     | 20872  | serine/threonine kinase 16                            | -1.23 | 0.68 | 0.55 |
| A_51_P352076  | NM_008399 | Itgae     | 16407  | integrin alpha E, epithelial-associated               | -1.33 | 0.68 | 0.37 |
| A_51_P510663  | NM_178652 | Supt3h    | 109115 | suppressor of Ty 3 homolog (S. cerevisiae)            | -1.31 | 0.68 | 0.44 |
| A_51_P100034  | NM_027162 | Mif4gd    | 69674  | MIF4G domain containing                               | -1.08 | 0.68 | 1.04 |
| A_52_P1638    | NM_139154 | Rab40c    | 224624 | Rab40c, member RAS oncogene family                    | -1.40 | 0.68 | 0.28 |
| A_51_P428836  | AK014640  | Hmgxb4    | 70823  | HMG box domain containing 4                           | -1.09 | 0.68 | 0.97 |
| A_52_P550805  | NM_133688 | Lym5      | 67636  | LYR motif containing 5                                | -1.38 | 0.68 | 0.30 |
| A_52_P388497  | NM_172509 | Kctd7     | 212919 | potassium channel tetramerisation domain containing 7 | -1.36 | 0.68 | 0.34 |
| A_52_P609319  | AK020076  | Nrip1     | 268903 | nuclear receptor interacting protein 1                | -1.07 | 0.68 | 1.04 |
| A_52_P298867  | NM_001024 | Trappc1   | 245828 | trafficking protein particle complex 1                | -1.11 | 0.68 | 0.91 |
| A_51_P273326  | XM_132230 | Sec31a    | 69162  | Sec31 homolog A (S. cerevisiae)                       | -1.34 | 0.68 | 0.37 |
| A_51_P482023  | NM_013502 | Ctbp1     | 13016  | C-terminal binding protein 1                          | -1.07 | 0.68 | 1.04 |
| A_51_P345159  | NM_026024 | Ube2t     | 67196  | ubiquitin-conjugating enzyme E2T (putative)           | -1.10 | 0.68 | 0.91 |
| A_52_P441044  | AK087489  | Rfxap     | 170767 | regulatory factor X-associated protein                | -1.30 | 0.68 | 0.44 |
| A_51_P289407  | BC019404  | Spg11     | 214585 | spastic paraplegia 11                                 | -1.23 | 0.68 | 0.55 |
| A_51_P454300  | NM_009296 | Supt4h1   | 20922  | suppressor of Ty 4 homolog 1 (S. cerevisiae)          | -1.41 | 0.68 | 0.28 |
| A_52_P599238  | NM_026274 | Rspry1    | 67610  | ring finger and SPRY domain containing 1              | -1.26 | 0.68 | 0.53 |
| A_52_P123924  | NM_177148 | NA        | NA     | NA                                                    | -1.30 | 0.68 | 0.44 |

|              |            |          |        |                                                                                                |       |      |      |
|--------------|------------|----------|--------|------------------------------------------------------------------------------------------------|-------|------|------|
| A_52_P680538 | AK041853   | NA       | NA     | NA                                                                                             | -1.50 | 0.68 | 0.20 |
| A_52_P44061  | NM_001030: | Fam193a  | 231128 | family with sequence similarity 193, member A                                                  | -1.17 | 0.68 | 0.77 |
| A_52_P577910 | BC006681   | Polb     | 18970  | polymerase (DNA directed), beta                                                                | -1.23 | 0.68 | 0.58 |
| A_52_P80567  | BC057020   | Nbas     | 71169  | neuroblastoma amplified sequence                                                               | -1.08 | 0.68 | 1.04 |
| A_51_P248044 | NM_008483  | Lamb2    | 16779  | laminin, beta 2                                                                                | -1.15 | 0.68 | 0.82 |
| A_52_P653184 | NA         | NA       | NA     | NA                                                                                             | -1.42 | 0.68 | 0.27 |
| A_51_P440978 | AK047822   | Mllt4    | 17356  | myeloid/lymphoid or mixed-lineage leukemia (trithorax homolog, Drosophila); translocated to, 4 | -1.14 | 0.68 | 0.82 |
| A_51_P511800 | NM_025909  | Oma1     | 67013  | OMA1 homolog, zinc metallopeptidase ( <i>S. cerevisiae</i> )                                   | -1.36 | 0.68 | 0.34 |
| A_51_P255336 | NM_007661  | Cdk11b   | 12537  | cyclin-dependent kinase 11B                                                                    | -1.43 | 0.68 | 0.24 |
| A_52_P421133 | NM_007533  | Bckdha   | 12039  | branched chain ketoacid dehydrogenase E1, alpha polypeptide                                    | -1.37 | 0.68 | 0.33 |
| A_51_P466371 | NM_008850  | Pitpna   | 18738  | phosphatidylinositol transfer protein, alpha                                                   | -1.12 | 0.68 | 0.86 |
| A_51_P188845 | NM_001008: | Adora1   | 11539  | adenosine A1 receptor                                                                          | -1.12 | 0.68 | 0.86 |
| A_52_P143976 | NM_134159  | Il17rc   | 171095 | interleukin 17 receptor C                                                                      | -1.56 | 0.68 | 0.15 |
| A_51_P408471 | NM_026638  | Cdipt    | 52858  | CDP-diacylglycerol--inositol 3-phosphatidyltransferase (phosphatidylinositol synthase)         | -1.29 | 0.68 | 0.46 |
| A_51_P117664 | XM_899121  | NA       | NA     | NA                                                                                             | -1.23 | 0.68 | 0.55 |
| A_52_P432169 | NA         | NA       | NA     | NA                                                                                             | -1.16 | 0.68 | 0.77 |
| A_51_P343252 | NM_009842  | Cd151    | 12476  | CD151 antigen                                                                                  | -1.51 | 0.68 | 0.20 |
| A_52_P373766 | NM_025680  | Ctnnb1   | 66642  | catenin, beta like 1                                                                           | -1.09 | 0.68 | 0.97 |
| A_51_P127615 | NM_009193  | Slbp     | 20492  | stem-loop binding protein                                                                      | -1.40 | 0.68 | 0.28 |
| A_51_P261443 | NM_011550  | Mlx      | 21428  | MAX-like protein X                                                                             | -1.28 | 0.68 | 0.46 |
| A_51_P339232 | NM_009228  | Snta1    | 20648  | syntrophin, acidic 1                                                                           | -1.20 | 0.68 | 0.67 |
| A_51_P411694 | BC023699   | Atpgd1   | 107239 | ATP-grasp domain containing 1                                                                  | -1.46 | 0.68 | 0.21 |
| A_52_P490310 | NM_183321  | BC053749 | 333193 | cDNA sequence BC053749                                                                         | -1.21 | 0.68 | 0.61 |
| A_51_P299934 | NM_173022  | BC048403 | 270802 | cDNA sequence BC048403                                                                         | -1.20 | 0.68 | 0.61 |
| A_51_P307325 | NM_009030  | Rbbp4    | 19646  | retinoblastoma binding protein 4                                                               | -1.39 | 0.68 | 0.28 |
| A_51_P259318 | BC027193   | Fbrs     | 14123  | fibrosin                                                                                       | -1.08 | 0.68 | 0.97 |
| A_52_P446120 | NM_001033: | Commd6   | 66200  | COMM domain containing 6                                                                       | -1.20 | 0.68 | 0.67 |
| A_51_P440443 | NM_138586  | Exosc5   | 27998  | exosome component 5                                                                            | -1.40 | 0.68 | 0.28 |

|               |           |                |        |                                                            |       |      |      |
|---------------|-----------|----------------|--------|------------------------------------------------------------|-------|------|------|
| A_51_P125935  | NM_018804 | Syt11          | 229521 | synaptotagmin XI                                           | -1.61 | 0.68 | 0.13 |
| A_52_P108023  | BC030902  | D430042O(      | 233865 | RIKEN cDNA D430042O09 gene                                 | -1.12 | 0.68 | 0.86 |
| A_51_P118223  | BC061236  | Wdr70          | 545085 | WD repeat domain 70                                        | -1.52 | 0.68 | 0.18 |
| A_51_P309889  | AK169010  | 2310044H169683 |        | RIKEN cDNA 2310044H10 gene                                 | -1.48 | 0.68 | 0.20 |
| A_52_P570006  | NM_001025 | 2700007P2      | 212772 | RIKEN cDNA 2700007P21 gene                                 | -1.18 | 0.68 | 0.67 |
| A_52_P123485  | NM_025804 | Tcf25          | 66855  | transcription factor 25 (basic helix-loop-helix)           | -1.30 | 0.68 | 0.44 |
| A_51_P159189  | NM_010565 | Inhbc          | 16325  | inhibin beta-C                                             | -1.16 | 0.68 | 0.77 |
| A_52_P1029764 | BM200271  | NA             | NA     | NA                                                         | -1.28 | 0.68 | 0.46 |
|               |           |                |        | solute carrier family 1 (high affinity aspartate/glutamate |       |      |      |
| A_51_P283016  | NM_009200 | Slc1a6         | 20513  | transporter), member 6                                     | -1.21 | 0.68 | 0.61 |
| A_52_P592835  | NM_017469 | Gucy1b3        | 54195  | guanylate cyclase 1, soluble, beta 3                       | -1.11 | 0.68 | 0.91 |
| A_52_P202991  | NA        | NA             | NA     | NA                                                         | -1.08 | 0.68 | 1.04 |
| A_51_P217430  | NM_023633 | 2410016O(      | 71952  | RIKEN cDNA 2410016O06 gene                                 | -1.31 | 0.68 | 0.44 |
| A_51_P196158  | NM_025295 | Btd            | 26363  | biotinidase                                                | -1.27 | 0.68 | 0.50 |
| A_52_P552665  | NM_008057 | Fzd7           | 14369  | frizzled homolog 7 (Drosophila)                            | -1.11 | 0.68 | 0.91 |
| A_51_P197850  | NM_011629 | Nr2c1          | 22025  | nuclear receptor subfamily 2, group C, member 1            | -1.19 | 0.68 | 0.67 |
| A_51_P122425  | NM_007795 | Ctf1           | 13019  | cardiotrophin 1                                            | -1.27 | 0.68 | 0.50 |
| A_52_P437201  | NM_177372 | Dna2           | 327762 | DNA replication helicase 2 homolog (yeast)                 | -1.23 | 0.68 | 0.55 |
| A_51_P392529  | NM_029748 | 2510006D1      | 76799  | RIKEN cDNA 2510006D16 gene                                 | -1.37 | 0.68 | 0.33 |
|               |           |                |        | translocase of outer mitochondrial membrane 40             |       |      |      |
| A_52_P495318  | NM_016871 | Tomm40         | 53333  | homolog (yeast)                                            | -1.14 | 0.68 | 0.82 |
| A_52_P255833  | NM_029502 | Cant1          | 76025  | calcium activated nucleotidase 1                           | -1.50 | 0.68 | 0.20 |
| A_52_P72938   | AK039096  | NA             | NA     | NA                                                         | -1.22 | 0.68 | 0.61 |
| A_52_P51355   | NM_008855 | Prkcb          | 18751  | protein kinase C, beta                                     | -1.55 | 0.68 | 0.16 |
| A_51_P269166  | NM_021412 | Mmp19          | 58223  | matrix metalloproteinase 19                                | -1.43 | 0.68 | 0.24 |
| A_52_P426863  | NM_178643 | C230052I1      | 101831 | RIKEN cDNA C230052I12 gene                                 | -1.37 | 0.68 | 0.33 |
| A_52_P301804  | NM_013565 | Itga3          | 16400  | integrin alpha 3                                           | -1.36 | 0.68 | 0.33 |
| A_51_P517834  | AK012806  | Thumpd2        | 72167  | THUMP domain containing 2                                  | -1.25 | 0.68 | 0.53 |
|               |           |                |        |                                                            |       |      |      |
| A_51_P136303  | NM_134127 | Cyp4f15        | 106648 | cytochrome P450, family 4, subfamily f, polypeptide 15     | -1.29 | 0.68 | 0.46 |
| A_52_P172453  | AK033182  | Usp34          | 17847  | ubiquitin specific peptidase 34                            | -1.30 | 0.68 | 0.44 |
|               |           |                |        | leucine zipper-EF-hand containing transmembrane            |       |      |      |
| A_52_P626101  | AK041725  | Letm2          | 270035 | protein 2                                                  | -1.19 | 0.68 | 0.67 |
| A_52_P116384  | NM_011678 | Usp4           | 22258  | ubiquitin specific peptidase 4 (proto-oncogene)            | -1.33 | 0.68 | 0.40 |

|              |           |                  |            |                                                                    |       |      |      |
|--------------|-----------|------------------|------------|--------------------------------------------------------------------|-------|------|------|
| A_51_P374383 | NM_010261 | Rabac1           | 14470      | Rab acceptor 1 (prenylated)                                        | -1.47 | 0.68 | 0.20 |
| A_51_P483089 | NM_010411 | Hdac3            | 15183      | histone deacetylase 3                                              | -1.20 | 0.68 | 0.67 |
| A_52_P131490 | NM_174874 | Atg4b            | 66615      | autophagy-related 4B (yeast)                                       | -1.35 | 0.68 | 0.34 |
| A_52_P645632 | AK029856  | Senp8            | 71599      | SUMO/sentrin specific peptidase 8                                  | -1.52 | 0.68 | 0.17 |
| A_51_P345975 | NM_022883 | Lpin3            | 64899      | lipin 3                                                            | -1.28 | 0.68 | 0.46 |
| A_52_P408438 | NM_021548 | Arpp19           | 59046      | cAMP-regulated phosphoprotein 19                                   | -1.09 | 0.68 | 0.97 |
| A_51_P177622 | NM_025580 | Pnkd             | 56695      | paroxysmal nonkinesigenic dyskinesia                               | -1.48 | 0.68 | 0.20 |
| A_51_P120729 | NM_027231 | Polr2f           | 69833      | polymerase (RNA) II (DNA directed) polypeptide F                   | -1.15 | 0.68 | 0.77 |
| A_52_P311068 | BC031202  | Plxnb2           | 140570     | plexin B2                                                          | -1.31 | 0.68 | 0.44 |
| A_52_P576863 | NM_025922 | ltpa             | 16434      | inosine triphosphatase (nucleoside triphosphate pyrophosphatase)   | -1.13 | 0.68 | 0.86 |
| A_51_P103222 | NM_028064 | Slc39a4          | 72027      | solute carrier family 39 (zinc transporter), member 4              | -1.18 | 0.68 | 0.70 |
| A_52_P515840 | AK052795  | Crk              | 12928      | v-crk sarcoma virus CT10 oncogene homolog (avian)                  | -1.09 | 0.68 | 0.97 |
| A_52_P8386   | XM_147419 | NA               | NA         | NA                                                                 | -1.42 | 0.68 | 0.27 |
| A_52_P172441 | AK052945  | Fitm2            | 228859     | fat storage-inducing transmembrane protein 2                       | -1.22 | 0.68 | 0.58 |
| A_51_P349912 | NM_010230 | Fmn1             | 14260      | formin 1                                                           | -1.27 | 0.68 | 0.50 |
| A_51_P165934 | NM_008831 | Phb              | 18673      | prohibitin                                                         | -1.18 | 0.68 | 0.67 |
| A_52_P377703 | NM_001037 | Brms1l           | 52592      | breast cancer metastasis-suppressor 1-like                         | -1.19 | 0.68 | 0.67 |
| A_52_P531175 | NM_013902 | Fkbp3            | 30795      | FK506 binding protein 3                                            | -1.14 | 0.68 | 0.82 |
| A_51_P414927 | NM_027388 | Pigw             | 70325      | phosphatidylinositol glycan anchor biosynthesis, class W           | -1.12 | 0.68 | 0.86 |
| A_52_P669451 | AK135586  | NA               | NA         | NA                                                                 | -1.14 | 0.68 | 0.82 |
| A_51_P419364 | NM_007522 | Bad              | 12015      | BCL2-associated agonist of cell death                              | -1.48 | 0.68 | 0.20 |
| A_51_P357685 | NM_026987 | Dhx16            | 69192      | DEAH (Asp-Glu-Ala-His) box polypeptide 16                          | -1.26 | 0.68 | 0.50 |
| A_52_P94454  | BC067003  | Trpc2            | 22064      | transient receptor potential cation channel, subfamily C, member 2 | -1.45 | 0.68 | 0.22 |
| A_52_P104782 | NM_025784 | Bcs1l            | 66821      | BCS1-like (yeast)                                                  | -1.38 | 0.68 | 0.30 |
| A_51_P356536 | AK020330  | 9230110I0; 77698 | 9230110I02 | RIKEN cDNA 9230110I02 gene                                         | -1.49 | 0.68 | 0.20 |
| A_51_P308254 | NM_013678 | Surf2            | 20931      | surfeit gene 2                                                     | -1.28 | 0.68 | 0.50 |
| A_51_P226364 | NM_026618 | Ccdc56           | 52469      | coiled-coil domain containing 56                                   | -1.25 | 0.68 | 0.53 |

|               |           |          |        |                                                           |       |      |      |
|---------------|-----------|----------|--------|-----------------------------------------------------------|-------|------|------|
|               |           |          |        | solute carrier family 39 (metal ion transporter), member  |       |      |      |
| A_52_P485939  | NM_026228 | Slc39a8  | 67547  | 8                                                         | -1.22 | 0.68 | 0.58 |
| A_52_P80391   | NM_033072 | Mbd6     | 110962 | methyl-CpG binding domain protein 6                       | -1.62 | 0.68 | 0.12 |
| A_51_P323174  | NM_178017 | Hmgxb4   | 70823  | HMG box domain containing 4                               | -1.16 | 0.68 | 0.77 |
| A_51_P414837  | NM_007983 | Faf1     | 14084  | Fas-associated factor 1                                   | -1.31 | 0.68 | 0.40 |
| A_51_P211152  | AK003209  | Phf14    | 75725  | PHD finger protein 14                                     | -1.47 | 0.68 | 0.20 |
| A_52_P315483  | BC013711  | Dgcr14   | 27886  | DiGeorge syndrome critical region gene 14                 | -1.14 | 0.68 | 0.82 |
| A_52_P558699  | NM_211355 | Smek1    | 68734  | SMEK homolog 1, suppressor of mek1 (Dictyostelium)        | -1.54 | 0.68 | 0.16 |
| A_51_P324442  | NM_172470 | Wdr35    | 74682  | WD repeat domain 35                                       | -1.35 | 0.68 | 0.34 |
| A_51_P489887  | NM_025491 | Susd3    | 66329  | sushi domain containing 3                                 | -1.33 | 0.68 | 0.37 |
| A_51_P212427  | NM_010681 | Lama4    | 16775  | laminin, alpha 4                                          | -1.19 | 0.68 | 0.67 |
| A_51_P239693  | AK021284  | Mll5     | 69188  | myeloid/lymphoid or mixed-lineage leukemia 5              | -1.30 | 0.68 | 0.44 |
| A_52_P542645  | AK032822  | Itga9    | 104099 | integrin alpha 9                                          | -1.40 | 0.68 | 0.28 |
| A_51_P225981  | NM_144842 | Zmym5    | 219105 | zinc finger, MYM-type 5                                   | -1.13 | 0.68 | 0.86 |
| A_51_P284741  | NA        | NA       | NA     | NA                                                        | -1.40 | 0.68 | 0.28 |
| A_51_P498132  | NM_008297 | Hsf2     | 15500  | heat shock factor 2                                       | -1.45 | 0.68 | 0.22 |
| A_52_P900176  | AK085158  | NA       | NA     | NA                                                        | -1.27 | 0.68 | 0.50 |
| A_51_P104430  | NM_053201 | Magee1   | 107528 | melanoma antigen, family E, 1                             | -1.20 | 0.68 | 0.61 |
| A_52_P161361  | NM_001025 | NA       | NA     | NA                                                        | -1.29 | 0.68 | 0.46 |
|               |           |          |        | Smg-5 homolog, nonsense mediated mRNA decay factor        |       |      |      |
| A_51_P365399  | NM_178246 | Smg5     | 229512 | (C. elegans)                                              | -1.42 | 0.68 | 0.27 |
| A_51_P456398  | NM_020050 | Tmem9b   | 56786  | TMEM9 domain family, member B                             | -1.30 | 0.67 | 0.44 |
| A_51_P141836  | NM_133907 | Ube3c    | 100763 | ubiquitin protein ligase E3C                              | -1.38 | 0.67 | 0.30 |
| A_51_P257619  | NM_133250 | Mutyh    | 70603  | mutY homolog (E. coli)                                    | -1.34 | 0.67 | 0.37 |
| A_51_P415809  | NM_026954 | Tusc1    | 69136  | tumor suppressor candidate 1                              | -1.26 | 0.67 | 0.53 |
| A_52_P228932  | NM_030678 | Gys1     | 14936  | glycogen synthase 1, muscle                               | -1.51 | 0.67 | 0.18 |
|               |           |          |        | transient receptor potential cation channel, subfamily C, |       |      |      |
| A_52_P427484  | NM_019828 | Trpc4ap  | 56407  | member 4 associated protein                               | -1.49 | 0.67 | 0.20 |
| A_51_P380875  | NM_007790 | Smc3     | 13006  | structural maintenance of chromosomes 3                   | -1.25 | 0.67 | 0.55 |
|               |           |          |        | phosphatidic acid phosphatase type 2 domain               |       |      |      |
| A_52_P8766    | NM_028922 | Ppapdc2  | 74411  | containing 2                                              | -1.28 | 0.67 | 0.46 |
| A_52_P1139491 | AK019832  | 4930588G | 78817  | RIKEN cDNA 4930588G05 gene                                | -1.10 | 0.67 | 0.91 |
| A_52_P875598  | AK047419  | NA       | NA     | NA                                                        | -1.47 | 0.67 | 0.21 |

|               |           |                  |         |                                                                                                                         |       |      |      |
|---------------|-----------|------------------|---------|-------------------------------------------------------------------------------------------------------------------------|-------|------|------|
| A_51_P315101  | NM_025656 | Sip1             | 66603   | survival of motor neuron protein interacting protein 1                                                                  | -1.37 | 0.67 | 0.33 |
| A_51_P132081  | NM_001013 | Rsl1             | 380855  | regulator of sex limited protein 1                                                                                      | -1.33 | 0.67 | 0.37 |
| A_52_P439745  | XM_001006 | NA               | NA      | NA                                                                                                                      | -1.29 | 0.67 | 0.46 |
| A_52_P258266  | AK038230  | NA               | NA      | NA                                                                                                                      | -1.48 | 0.67 | 0.20 |
| A_52_P1188723 | AK086376  | Caprin1          | 53872   | cell cycle associated protein 1                                                                                         | -1.20 | 0.67 | 0.67 |
| A_52_P340079  | NM_172566 | Rundc1           | 217201  | RUN domain containing 1                                                                                                 | -1.46 | 0.67 | 0.21 |
| A_52_P30920   | NM_013761 | Srr              | 27364   | serine racemase                                                                                                         | -1.45 | 0.67 | 0.22 |
| A_51_P399217  | NM_024464 | Pigx             | 72084   | phosphatidylinositol glycan anchor biosynthesis, class X<br>ATP synthase, H <sup>+</sup> transporting, mitochondrial F1 | -1.38 | 0.67 | 0.30 |
| A_51_P362054  | NM_025983 | Atp5e            | 67126   | complex, epsilon subunit                                                                                                | -1.36 | 0.67 | 0.34 |
| A_51_P272586  | NM_027727 | Dym              | 69190   | dymeclin                                                                                                                | -1.27 | 0.67 | 0.50 |
| A_52_P408826  | AK079287  | 9530083O1319610  | 1319610 | RIKEN cDNA 9530083O12 gene                                                                                              | -1.23 | 0.67 | 0.58 |
| A_51_P482464  | NM_009352 | Terf1            | 21749   | telomeric repeat binding factor 1                                                                                       | -1.44 | 0.67 | 0.22 |
| A_52_P672722  | NM_198011 | E430018J2:101604 | 101604  | RIKEN cDNA E430018J23 gene                                                                                              | -1.30 | 0.67 | 0.44 |
| A_52_P297773  | BC055394  | Ugg2             | 66435   | UDP-glucose glycoprotein glucosyltransferase 2                                                                          | -1.46 | 0.67 | 0.22 |
| A_52_P406419  | NM_009730 | Atrn             | 11990   | attractin                                                                                                               | -1.16 | 0.67 | 0.77 |
| A_52_P11959   | NM_153151 | Acat3            | 224530  | acetyl-Coenzyme A acetyltransferase 3                                                                                   | -1.08 | 0.67 | 1.04 |
| A_52_P597726  | NM_201372 | Ccdc84           | 382073  | coiled-coil domain containing 84                                                                                        | -1.33 | 0.67 | 0.40 |
| A_52_P670263  | BC036146  | Tfpi             | 21788   | tissue factor pathway inhibitor                                                                                         | -1.20 | 0.67 | 0.67 |
| A_51_P123623  | NM_207232 | Ptpdc1           | 218232  | protein tyrosine phosphatase domain containing 1                                                                        | -1.38 | 0.67 | 0.33 |
| A_52_P293248  | AK049953  | Dock4            | 238130  | dedicator of cytokinesis 4<br>Williams Beuren syndrome chromosome region 27                                             | -1.23 | 0.67 | 0.58 |
| A_52_P428725  | NM_024479 | Wbscr27          | 79565   | (human)                                                                                                                 | -1.26 | 0.67 | 0.53 |
| A_52_P257377  | NA        | NA               | NA      | NA                                                                                                                      | -1.43 | 0.67 | 0.24 |
| A_52_P234087  | AK053336  | Tek              | 21687   | endothelial-specific receptor tyrosine kinase                                                                           | -1.30 | 0.67 | 0.44 |
| A_52_P547538  | NM_007626 | Cbx5             | 12419   | chromobox homolog 5 (Drosophila HP1a)                                                                                   | -1.30 | 0.67 | 0.44 |
| A_51_P104718  | NM_001010 | Gpr12            | 14738   | G-protein coupled receptor 12                                                                                           | -1.33 | 0.67 | 0.40 |
| A_51_P399625  | NM_009919 | Cnih             | 12793   | cornichon homolog (Drosophila)                                                                                          | -1.43 | 0.67 | 0.24 |
| A_52_P105374  | XM_001000 | NA               | NA      | NA                                                                                                                      | -1.15 | 0.67 | 0.82 |
| A_51_P212023  | NM_016926 | Sart3            | 53890   | squamous cell carcinoma antigen recognized by T-cells 3                                                                 | -1.25 | 0.67 | 0.53 |



|              |            |            |        |                                                  |       |      |      |
|--------------|------------|------------|--------|--------------------------------------------------|-------|------|------|
| A_51_P327904 | NM_145550  | Yipf1      | 230584 | Yip1 domain family, member 1                     | -1.33 | 0.67 | 0.37 |
| A_52_P321342 | NM_028785  | Dock8      | 76088  | dedicator of cytokinesis 8                       | -1.30 | 0.67 | 0.44 |
| A_51_P353502 | NM_025340  | Sharpin    | 106025 | SHANK-associated RH domain interacting protein   | -1.47 | 0.67 | 0.20 |
| A_52_P36256  | NA         | NA         | NA     | NA                                               | -1.33 | 0.67 | 0.40 |
|              |            |            |        | haloacid dehalogenase-like hydrolase domain      |       |      |      |
| A_52_P450675 | NM_001039: | Hdhd2      | 76987  | containing 2                                     | -1.21 | 0.67 | 0.61 |
| A_52_P932234 | AK079244   | NA         | NA     | NA                                               | -1.38 | 0.67 | 0.30 |
| A_52_P234159 | NM_177124  | Tnrc6b     | 213988 | trinucleotide repeat containing 6b               | -1.28 | 0.67 | 0.46 |
| A_52_P115845 | XM_902782  | NA         | NA     | NA                                               | -1.20 | 0.67 | 0.61 |
| A_52_P45596  | L25761     | Ephb4      | 13846  | Eph receptor B4                                  | -1.32 | 0.67 | 0.40 |
| A_51_P198775 | NM_201364  | BC055324   | 381306 | cDNA sequence BC055324                           | -1.23 | 0.67 | 0.58 |
| A_51_P496780 | NM_175016  | Alkbh2     | 231642 | alkB, alkylation repair homolog 2 (E. coli)      | -1.13 | 0.67 | 0.82 |
| A_51_P254912 | NM_020022  | Rfc2       | 19718  | replication factor C (activator 1) 2             | -1.32 | 0.67 | 0.40 |
| A_52_P223407 | AK135623   | Mrpl35     | 66223  | mitochondrial ribosomal protein L35              | -1.28 | 0.67 | 0.50 |
| A_52_P297398 | NM_001039: | Bicd2      | 76895  | bicaudal D homolog 2 (Drosophila)                | -1.31 | 0.67 | 0.44 |
| A_51_P156800 | NM_028308  | 2700078K2  | 101513 | RIKEN cDNA 2700078K21 gene                       | -1.57 | 0.67 | 0.15 |
| A_52_P35304  | NM_007692  | Chkb       | 12651  | choline kinase beta                              | -1.28 | 0.67 | 0.50 |
| A_52_P30497  | NM_007872  | Dnmt3a     | 13435  | DNA methyltransferase 3A                         | -1.40 | 0.67 | 0.28 |
| A_52_P793384 | BC065397   | BC065397   | 436230 | cDNA sequence BC065397                           | -1.28 | 0.67 | 0.46 |
| A_52_P82488  | NM_021476  | Cysltr1    | 58861  | cysteinyl leukotriene receptor 1                 | -1.59 | 0.67 | 0.14 |
| A_51_P361049 | NM_025370  | 1110018J1: | 66129  | RIKEN cDNA 1110018J18 gene                       | -1.26 | 0.67 | 0.53 |
| A_52_P237451 | NM_024213  | Anapc4     | 52206  | anaphase promoting complex subunit 4             | -1.22 | 0.67 | 0.58 |
| A_51_P158814 | XM_994605  | NA         | NA     | NA                                               | -1.25 | 0.67 | 0.55 |
| A_51_P176231 | AK051663   | Stox2      | 71069  | storkhead box 2                                  | -1.36 | 0.67 | 0.34 |
| A_52_P50959  | NM_139291  | Cdc26      | 66440  | cell division cycle 26                           | -1.21 | 0.67 | 0.61 |
| A_51_P413698 | NM_025570  | Mrpl20     | 66448  | mitochondrial ribosomal protein L20              | -1.09 | 0.67 | 0.97 |
| A_52_P645637 | AK029856   | Senp8      | 71599  | SUMO/sentrin specific peptidase 8                | -1.23 | 0.67 | 0.55 |
| A_52_P107674 | AK019871   | Rbm4b      | 66704  | RNA binding motif protein 4B                     | -1.19 | 0.67 | 0.67 |
| A_51_P172441 | NM_198303  | Eif5b      | 226982 | eukaryotic translation initiation factor 5B      | -1.18 | 0.67 | 0.67 |
| A_51_P364185 | XM_486062  | NA         | NA     | NA                                               | -1.22 | 0.67 | 0.61 |
|              |            |            |        | CTD (carboxy-terminal domain, RNA polymerase II, |       |      |      |
| A_51_P237076 | NM_146012  | Ctdsp2     | 52468  | polypeptide A) small phosphatase 2               | -1.13 | 0.67 | 0.86 |
| A_51_P262228 | NM_145466  | A2ld1      | 223267 | AIG2-like domain 1                               | -1.58 | 0.67 | 0.15 |

|              |           |           |        |                                                                                               |       |      |      |
|--------------|-----------|-----------|--------|-----------------------------------------------------------------------------------------------|-------|------|------|
| A_52_P24783  | NM_175310 | Pds5b     | 100710 | PDS5, regulator of cohesion maintenance, homolog B ( <i>S. cerevisiae</i> )                   | -1.31 | 0.67 | 0.44 |
| A_51_P250358 | NM_177806 | Prpf39    | 328110 | PRP39 pre-mRNA processing factor 39 homolog (yeast)                                           | -1.25 | 0.67 | 0.55 |
| A_51_P186118 | NM_024201 | Ccdc127   | 67433  | coiled-coil domain containing 127                                                             | -1.22 | 0.67 | 0.58 |
| A_52_P14600  | AK144191  | Cd72      | 12517  | CD72 antigen                                                                                  | -1.18 | 0.67 | 0.67 |
| A_52_P290221 | AK032094  | Zfp182    | 319535 | zinc finger protein 182                                                                       | -1.28 | 0.67 | 0.46 |
| A_51_P275845 | NM_025999 | Rnf141    | 67150  | ring finger protein 141                                                                       | -1.15 | 0.67 | 0.82 |
| A_52_P47006  | AK161013  | Mre11a    | 17535  | meiotic recombination 11 homolog A ( <i>S. cerevisiae</i> )                                   | -1.14 | 0.67 | 0.82 |
| A_51_P115886 | NM_026655 | 2310057M  | 68277  | RIKEN cDNA 2310057M21 gene                                                                    | -1.23 | 0.67 | 0.58 |
| A_51_P168171 | NM_024168 | Tsen34    | 66078  | tRNA splicing endonuclease 34 homolog ( <i>S. cerevisiae</i> )                                | -1.44 | 0.67 | 0.22 |
| A_52_P664593 | NM_146137 | Amigo1    | 229715 | adhesion molecule with Ig like domain 1                                                       | -1.55 | 0.67 | 0.16 |
| A_52_P201912 | AK158109  | 1190007F0 | 68859  | RIKEN cDNA 1190007F08 gene                                                                    | -1.10 | 0.67 | 0.91 |
| A_51_P189334 | NA        | NA        | NA     | NA                                                                                            | -1.26 | 0.67 | 0.53 |
| A_51_P425373 | NM_028047 | 1500002O2 | 71997  | RIKEN cDNA 1500002O20 gene                                                                    | -1.21 | 0.67 | 0.61 |
| A_52_P32683  | XM_001002 | NA        | NA     | NA                                                                                            | -1.12 | 0.67 | 0.86 |
| A_51_P146407 | NM_138598 | D11Wsu99  | 28081  | DNA segment, Chr 11, Wayne State University 99, expressed                                     | -1.41 | 0.67 | 0.27 |
| A_51_P310949 | NM_008911 | Ppox      | 19044  | protoporphyrinogen oxidase                                                                    | -1.15 | 0.67 | 0.77 |
| A_52_P172619 | NM_053207 | Egln1     | 112405 | EGL nine homolog 1 ( <i>C. elegans</i> )                                                      | -1.23 | 0.67 | 0.58 |
| A_52_P669145 | NM_001005 | Hps5      | 246694 | Hermansky-Pudlak syndrome 5 homolog (human) proteasome (prosome, macropain) 26S subunit, non- | -1.17 | 0.67 | 0.70 |
| A_51_P207962 | NM_008951 | Psmd4     | 19185  | ATPase, 4                                                                                     | -1.59 | 0.67 | 0.14 |
| A_51_P314830 | NM_011306 | Rxrb      | 20182  | retinoid X receptor beta                                                                      | -1.14 | 0.67 | 0.82 |
| A_52_P580483 | NM_021419 | Rnf8      | 58230  | ring finger protein 8                                                                         | -1.42 | 0.67 | 0.27 |
| A_51_P414320 | NM_181048 | A130010J1 | 319266 | RIKEN cDNA A130010J15 gene                                                                    | -1.26 | 0.67 | 0.53 |
| A_52_P973126 | AI553296  | NA        | NA     | NA                                                                                            | -1.34 | 0.67 | 0.37 |
| A_51_P439520 | AK054000  | Pacs2     | 217893 | phosphofurin acidic cluster sorting protein 2                                                 | -1.34 | 0.67 | 0.37 |
| A_52_P442852 | NM_001024 | Kbtbd7    | 211255 | kelch repeat and BTB (POZ) domain containing 7                                                | -1.07 | 0.67 | 1.04 |
| A_51_P485043 | NM_008302 | Hsp90ab1  | 15516  | heat shock protein 90 alpha (cytosolic), class B member 1                                     | -1.20 | 0.67 | 0.67 |

|              |           |                |        |                                                      |       |      |      |
|--------------|-----------|----------------|--------|------------------------------------------------------|-------|------|------|
| A_51_P154933 | NM_133967 | Zdhhc7         | 102193 | zinc finger, DHHC domain containing 7                | -1.36 | 0.67 | 0.34 |
| A_51_P381506 | NM_172145 | Fam176b        | 230752 | family with sequence similarity 176, member B        | -1.57 | 0.67 | 0.15 |
| A_51_P320786 | NM_019726 | Gps2           | 56310  | G protein pathway suppressor 2                       | -1.29 | 0.67 | 0.46 |
| A_51_P285844 | NM_011680 | Usf2           | 22282  | upstream transcription factor 2                      | -1.36 | 0.67 | 0.34 |
| A_52_P49457  | XM_913601 | NA             | NA     | NA                                                   | -1.45 | 0.67 | 0.22 |
| A_52_P134556 | NM_027353 | Cd2bp2         | 70233  | CD2 antigen (cytoplasmic tail) binding protein 2     | -1.24 | 0.67 | 0.55 |
| A_52_P333953 | NM_009594 | Abl1           | 11350  | c-abl oncogene 1, receptor tyrosine kinase           | -1.12 | 0.67 | 0.86 |
| A_52_P128818 | NM_172407 | Cdkn2aip       | 70925  | CDKN2A interacting protein                           | -1.09 | 0.67 | 0.97 |
| A_52_P217329 | AK016722  | 4933407H171101 |        | RIKEN cDNA 4933407H18 gene                           | -1.16 | 0.67 | 0.77 |
| A_51_P314763 | NM_011231 | Rabggtb        | 19352  | RAB geranylgeranyl transferase, b subunit            | -1.25 | 0.67 | 0.53 |
| A_51_P426943 | NM_018855 | Gas8           | 104346 | growth arrest specific 8                             | -1.33 | 0.67 | 0.40 |
| A_51_P518298 | BC072613  | Rnf187         | 108660 | ring finger protein 187                              | -1.37 | 0.67 | 0.33 |
| A_51_P186552 | NM_175454 | C630004HC      | 217310 | RIKEN cDNA C630004H02 gene                           | -1.24 | 0.67 | 0.55 |
| A_51_P374453 | NM_145370 | Gps1           | 209318 | G protein pathway suppressor 1                       | -1.33 | 0.67 | 0.37 |
| A_52_P803668 | AK137981  | 2810021B0      | 66308  | RIKEN cDNA 2810021B07 gene                           | -1.18 | 0.67 | 0.70 |
|              |           |                |        | mannoside acetylglucosaminyltransferase 4, isoenzyme |       |      |      |
| A_52_P337220 | NM_145926 | Mgat4b         | 103534 | B                                                    | -1.49 | 0.67 | 0.20 |
| A_52_P536015 | NM_145404 | Prmt7          | 214572 | protein arginine N-methyltransferase 7               | -1.30 | 0.67 | 0.44 |
| A_51_P405985 | NM_133999 | Fig4           | 103199 | FIG4 homolog ( <i>S. cerevisiae</i> )                | -1.30 | 0.67 | 0.44 |
| A_52_P981301 | NA        | NA             | NA     | NA                                                   | -1.29 | 0.67 | 0.46 |
| A_52_P465521 | NA        | NA             | NA     | NA                                                   | -1.12 | 0.67 | 0.86 |
| A_51_P185103 | NM_024428 | Dpy30          | 66310  | dpy-30 homolog ( <i>C. elegans</i> )                 | -1.29 | 0.67 | 0.46 |
| A_51_P242345 | NM_146193 | Btbd1          | 83962  | BTB (POZ) domain containing 1                        | -1.51 | 0.67 | 0.18 |
| A_51_P116581 | NM_138603 | Ccdc22         | 54638  | coiled-coil domain containing 22                     | -1.31 | 0.67 | 0.44 |
| A_51_P324651 | AK013763  | Lphn1          | 330814 | latrophilin 1                                        | -1.35 | 0.67 | 0.34 |
| A_52_P375845 | NM_026666 | Ubn1           | 170644 | ubiquitin 1                                          | -1.22 | 0.67 | 0.58 |
| A_51_P227826 | NM_016794 | Vamp8          | 22320  | vesicle-associated membrane protein 8                | -1.54 | 0.67 | 0.16 |
| A_52_P318053 | NA        | NA             | NA     | NA                                                   | -1.20 | 0.67 | 0.61 |
| A_52_P598634 | AK045413  | 1190007I0      | 544717 | RIKEN cDNA 1190007I07 gene                           | -1.37 | 0.67 | 0.33 |
| A_52_P500351 | NM_016753 | Lxn            | 17035  | latexin                                              | -1.43 | 0.67 | 0.24 |
|              |           |                |        | inosine triphosphatase (nucleoside triphosphate      |       |      |      |
| A_52_P455404 | NM_025922 | ltpa           | 16434  | pyrophosphatase)                                     | -1.15 | 0.67 | 0.82 |
| A_52_P488488 | AK020759  | A430103D1      | 77775  | RIKEN cDNA A430103D13 gene                           | -1.46 | 0.67 | 0.21 |
| A_52_P436447 | NM_028048 | Slc25a35       | 71998  | solute carrier family 25, member 35                  | -1.40 | 0.67 | 0.28 |

|              |           |           |        |                                                                                             |       |      |      |
|--------------|-----------|-----------|--------|---------------------------------------------------------------------------------------------|-------|------|------|
| A_52_P231635 | NM_027695 | Oxsm      | 71147  | 3-oxoacyl-ACP synthase, mitochondrial                                                       | -1.28 | 0.67 | 0.46 |
| A_51_P260639 | NM_028811 | Elp3      | 74195  | elongation protein 3 homolog ( <i>S. cerevisiae</i> )                                       | -1.36 | 0.67 | 0.33 |
| A_51_P520690 | NM_008925 | Prkcsh    | 19089  | protein kinase C substrate 80K-H                                                            | -1.21 | 0.67 | 0.61 |
| A_51_P374190 | NM_212473 | Fam53b    | 77938  | family with sequence similarity 53, member B                                                | -1.27 | 0.67 | 0.50 |
| A_52_P378452 | AK170049  | Tex261    | 21766  | testis expressed gene 261                                                                   | -1.50 | 0.67 | 0.20 |
| A_52_P652289 | AK032921  | NA        | NA     | NA                                                                                          | -1.34 | 0.67 | 0.37 |
| A_52_P136138 | NM_010191 | Fdft1     | 14137  | farnesyl diphosphate farnesyl transferase 1                                                 | -1.23 | 0.67 | 0.58 |
| A_52_P608318 | NM_019640 | Pitpnb    | 56305  | phosphatidylinositol transfer protein, beta                                                 | -1.27 | 0.67 | 0.50 |
| A_52_P516059 | NM_011585 | Tia1      | 21841  | cytotoxic granule-associated RNA binding protein 1                                          | -1.52 | 0.67 | 0.18 |
| A_51_P329490 | AK136770  | Slc25a40  | 319653 | solute carrier family 25, member 40<br>eosinophil-associated, ribonuclease A family, member | -1.45 | 0.67 | 0.22 |
| A_51_P268535 | NM_053112 | Ear10     | 93725  | 10                                                                                          | -1.21 | 0.67 | 0.61 |
| A_52_P134146 | NM_001076 | 1810012P1 | 66274  | RIKEN cDNA 1810012P15 gene                                                                  | -1.25 | 0.67 | 0.55 |
| A_52_P134141 | NM_025574 | Pigy      | 66459  | phosphatidylinositol glycan anchor biosynthesis, class Y                                    | -1.19 | 0.67 | 0.67 |
| A_52_P652671 | NM_019424 | Hps1      | 192236 | Hermansky-Pudlak syndrome 1 homolog (human)                                                 | -1.30 | 0.67 | 0.44 |
| A_51_P357422 | NM_025556 | 2410022L0 | 66423  | RIKEN cDNA 2410022L05 gene                                                                  | -1.27 | 0.67 | 0.50 |
| A_51_P392134 | NM_080560 | Ube2n     | 93765  | ubiquitin-conjugating enzyme E2N                                                            | -1.40 | 0.67 | 0.28 |
| A_51_P435858 | NA        | NA        | NA     | NA                                                                                          | -1.09 | 0.67 | 0.97 |
| A_52_P448236 | NM_029281 | Zfp820    | 75424  | zinc finger protein 820                                                                     | -1.23 | 0.67 | 0.58 |
| A_52_P500488 | BC052715  | Lars      | 107045 | leucyl-tRNA synthetase                                                                      | -1.17 | 0.67 | 0.70 |
| A_51_P425642 | NM_019518 | Grasp     | 56149  | GRP1 (general receptor for phosphoinositides 1)-<br>associated scaffold protein             | -1.19 | 0.67 | 0.67 |
| A_52_P516    | NM_001038 | Smurf1    | 75788  | SMAD specific E3 ubiquitin protein ligase 1                                                 | -1.14 | 0.67 | 0.82 |
| A_51_P321086 | NM_025275 | Amz2      | 13929  | archaelysin family metallopeptidase 2                                                       | -1.13 | 0.67 | 0.86 |
| A_52_P460977 | NA        | NA        | NA     | NA                                                                                          | -1.30 | 0.67 | 0.44 |
| A_52_P3825   | NM_028119 | Ddb2      | 107986 | damage specific DNA binding protein 2                                                       | -1.08 | 0.67 | 1.04 |
| A_51_P168792 | NM_001033 | Xylb      | 102448 | xylulokinase homolog ( <i>H. influenzae</i> )                                               | -1.42 | 0.67 | 0.27 |
| A_52_P317040 | NM_145537 | Edem2     | 108687 | ER degradation enhancer, mannosidase alpha-like 2                                           | -1.07 | 0.67 | 1.04 |
| A_52_P601980 | NM_152895 | Kdm5b     | 75605  | lysine (K)-specific demethylase 5B                                                          | -1.33 | 0.67 | 0.40 |
| A_52_P323215 | NM_019570 | Rev1      | 56210  | REV1 homolog ( <i>S. cerevisiae</i> )                                                       | -1.37 | 0.67 | 0.33 |

|              |           |           |        |                                                                                        |       |      |      |
|--------------|-----------|-----------|--------|----------------------------------------------------------------------------------------|-------|------|------|
| A_52_P362381 | NM_024180 | Ormdl2    | 66844  | ORM1-like 2 ( <i>S. cerevisiae</i> )                                                   | -1.51 | 0.67 | 0.18 |
| A_51_P488121 | NM_001033 | Agap2     | 216439 | ArfGAP with GTPase domain, ankyrin repeat and PH domain 2                              | -1.25 | 0.67 | 0.53 |
| A_51_P261146 | NM_010716 | Lig3      | 16882  | ligase III, DNA, ATP-dependent mediator of RNA polymerase II transcription, subunit 25 | -1.31 | 0.67 | 0.44 |
| A_51_P392861 | NM_029365 | Med25     | 75613  | homolog (yeast)                                                                        | -1.52 | 0.67 | 0.17 |
| A_52_P684642 | NM_178910 | Ankmy2    | 217473 | ankyrin repeat and MYND domain containing 2                                            | -1.32 | 0.67 | 0.40 |
| A_51_P249313 | NM_028705 | Herc3     | 73998  | hect domain and RLD 3                                                                  | -1.31 | 0.67 | 0.44 |
| A_51_P433338 | NM_053180 | Cdk20     | 105278 | cyclin-dependent kinase 20                                                             | -1.14 | 0.67 | 0.82 |
| A_51_P200667 | NM_053155 | Clmn      | 94040  | calmin                                                                                 | -1.11 | 0.67 | 0.91 |
| A_52_P48546  | NM_026259 | Rnf41     | 67588  | ring finger protein 41                                                                 | -1.15 | 0.67 | 0.82 |
| A_51_P250832 | NM_139236 | Nol6      | 230082 | nucleolar protein family 6 (RNA-associated)                                            | -1.20 | 0.67 | 0.61 |
| A_52_P589119 | NM_197981 | 593041611 | 72440  | RIKEN cDNA 5930416119 gene                                                             | -1.51 | 0.67 | 0.18 |
| A_51_P268559 | NM_029573 | Idh3a     | 67834  | isocitrate dehydrogenase 3 (NAD+) alpha                                                | -1.20 | 0.67 | 0.67 |
| A_51_P495171 | NM_026312 | 2610029G2 | 67683  | RIKEN cDNA 2610029G23 gene                                                             | -1.23 | 0.67 | 0.58 |
| A_52_P581239 | NA        | NA        | NA     | NA                                                                                     | -1.48 | 0.67 | 0.20 |
| A_52_P231079 | NM_144521 | Snap47    | 67826  | synaptosomal-associated protein, 47                                                    | -1.16 | 0.66 | 0.77 |
| A_51_P285323 | NM_175265 | 6720463M  | 77744  | RIKEN cDNA 6720463M24 gene                                                             | -1.33 | 0.66 | 0.40 |
| A_51_P171557 | NM_145412 | Chtf8     | 214987 | CTF8, chromosome transmission fidelity factor 8 homolog ( <i>S. cerevisiae</i> )       | -1.46 | 0.66 | 0.22 |
| A_52_P229320 | BC060140  | Rptor     | 74370  | regulatory associated protein of MTOR, complex 1                                       | -1.67 | 0.66 | 0.10 |
| A_52_P594768 | NM_009698 | Aprt      | 11821  | adenine phosphoribosyl transferase                                                     | -1.28 | 0.66 | 0.50 |
| A_52_P283524 | NM_022980 | Rcan3     | 53902  | regulator of calcineurin 3                                                             | -1.42 | 0.66 | 0.27 |
| A_51_P485899 | NM_001078 | Sfrs1     | 110809 | splicing factor, arginine/serine-rich 1 (ASF/SF2)                                      | -1.41 | 0.66 | 0.27 |
| A_51_P106259 | NM_133926 | Camk1     | 52163  | calcium/calmodulin-dependent protein kinase I                                          | -1.66 | 0.66 | 0.10 |
| A_52_P527400 | NM_206882 | Hist3h2bb | 382522 | histone cluster 3, H2bb                                                                | -1.16 | 0.66 | 0.77 |
| A_51_P225506 | NM_026383 | Pnrc2     | 52830  | proline-rich nuclear receptor coactivator 2                                            | -1.20 | 0.66 | 0.61 |
| A_51_P136888 | NM_009029 | Rb1       | 19645  | retinoblastoma 1                                                                       | -1.46 | 0.66 | 0.21 |
| A_51_P405970 | AK147241  | Trrap     | 100683 | transformation/transcription domain-associated protein                                 | -1.53 | 0.66 | 0.17 |
| A_51_P348548 | NM_012029 | Ecsit     | 26940  | ECSIT homolog ( <i>Drosophila</i> )                                                    | -1.53 | 0.66 | 0.17 |
| A_52_P183432 | NM_001039 | Pofut1    | 140484 | protein O-fucosyltransferase 1                                                         | -1.39 | 0.66 | 0.30 |
| A_52_P97489  | AK080954  | Eif2c1    | 236511 | eukaryotic translation initiation factor 2C, 1                                         | -1.10 | 0.66 | 0.91 |

|              |           |           |        |                                                                                                |       |      |      |
|--------------|-----------|-----------|--------|------------------------------------------------------------------------------------------------|-------|------|------|
| A_51_P249360 | NM_173733 | Suox      | 211389 | sulfite oxidase                                                                                | -1.46 | 0.66 | 0.21 |
| A_51_P105241 | NM_028888 | 4931428F0 | 74356  | RIKEN cDNA 4931428F04 gene                                                                     | -1.53 | 0.66 | 0.17 |
| A_52_P461378 | NM_027154 | Tmbim1    | 69660  | transmembrane BAX inhibitor motif containing 1                                                 | -1.40 | 0.66 | 0.28 |
| A_52_P381958 | BC067002  | 4632419I2 | 74038  | RIKEN cDNA 4632419I22 gene                                                                     | -1.24 | 0.66 | 0.55 |
| A_51_P334199 | NM_010143 | Ephb3     | 13845  | Eph receptor B3                                                                                | -1.24 | 0.66 | 0.55 |
| A_52_P841474 | AV264460  | NA        | NA     | NA                                                                                             | -1.63 | 0.66 | 0.12 |
| A_51_P475502 | NA        | NA        | NA     | NA                                                                                             | -1.13 | 0.66 | 0.86 |
| A_51_P362209 | NM_178377 | Commd10   | 69456  | COMM domain containing 10                                                                      | -1.40 | 0.66 | 0.28 |
| A_51_P472518 | NM_007600 | Capn1     | 12333  | calpain 1                                                                                      | -1.36 | 0.66 | 0.34 |
| A_51_P500313 | NM_013853 | Abcf2     | 27407  | ATP-binding cassette, sub-family F (GCN20), member 2                                           | -1.41 | 0.66 | 0.27 |
| A_51_P409761 | NM_001048 | 2810008M  | 75616  | RIKEN cDNA 2810008M24 gene                                                                     | -1.34 | 0.66 | 0.37 |
| A_51_P359813 | NM_027874 | Csnk1d    | 104318 | casein kinase 1, delta                                                                         | -1.29 | 0.66 | 0.46 |
| A_52_P510062 | AK038230  | NA        | NA     | NA                                                                                             | -1.47 | 0.66 | 0.20 |
| A_51_P321405 | NM_026714 | Ccdc163   | 68394  | coiled-coil domain containing 163                                                              | -1.38 | 0.66 | 0.30 |
| A_51_P278184 | NM_172558 | Gemin5    | 216766 | gem (nuclear organelle) associated protein 5                                                   | -1.20 | 0.66 | 0.67 |
| A_52_P476699 | NM_177367 | Gemin4    | 276919 | gem (nuclear organelle) associated protein 4                                                   | -1.23 | 0.66 | 0.58 |
| A_51_P175069 | NM_172619 | Adamts10  | 224697 | a disintegrin-like and metallopeptidase (reprolysin type) with thrombospondin type 1 motif, 10 | -1.31 | 0.66 | 0.44 |
| A_51_P385370 | NM_001033 | Prickle1  | 106042 | prickle homolog 1 (Drosophila)                                                                 | -1.08 | 0.66 | 1.04 |
| A_51_P487678 | NM_025772 | Dtnbp1    | 94245  | dystrobrevin binding protein 1                                                                 | -1.49 | 0.66 | 0.20 |
| A_51_P222558 | NM_030074 | Zfp687    | 78266  | zinc finger protein 687                                                                        | -1.16 | 0.66 | 0.77 |
| A_51_P125316 | AK003718  | Hipk2     | 15258  | homeodomain interacting protein kinase 2                                                       | -1.70 | 0.66 | 0.09 |
| A_51_P221072 | NM_175425 | C1qtnf7   | 109323 | C1q and tumor necrosis factor related protein 7                                                | -1.29 | 0.66 | 0.46 |
| A_52_P233801 | NM_001077 | Dysf      | 26903  | dysferlin                                                                                      | -1.43 | 0.66 | 0.24 |
| A_51_P485683 | NM_025960 | Trappc6a  | 67091  | trafficking protein particle complex 6A                                                        | -1.56 | 0.66 | 0.15 |
| A_52_P190921 | AK032508  | Eif2ak1   | 15467  | eukaryotic translation initiation factor 2 alpha kinase 1                                      | -1.41 | 0.66 | 0.27 |
| A_52_P600824 | NA        | NA        | NA     | NA                                                                                             | -1.08 | 0.66 | 1.04 |
| A_51_P351394 | NM_013841 | Vps45     | 22365  | vacuolar protein sorting 45 (yeast)                                                            | -1.24 | 0.66 | 0.55 |
| A_51_P166023 | NM_146001 | Hip1      | 215114 | huntingtin interacting protein 1                                                               | -1.65 | 0.66 | 0.11 |
| A_51_P515452 | NM_019873 | Fkbp1     | 56299  | FK506 binding protein-like                                                                     | -1.22 | 0.66 | 0.58 |
| A_52_P659417 | NM_175300 | Anapc2    | 99152  | anaphase promoting complex subunit 2                                                           | -1.53 | 0.66 | 0.17 |

|              |           |          |        |                                                             |       |      |      |
|--------------|-----------|----------|--------|-------------------------------------------------------------|-------|------|------|
| A_52_P820923 | CO811088  | NA       | NA     | NA                                                          | -1.15 | 0.66 | 0.82 |
| A_51_P174773 | NM_026063 | 2900010M | 67267  | RIKEN cDNA 2900010M23 gene                                  | -1.27 | 0.66 | 0.50 |
| A_51_P479894 | NM_018813 | Cpsf3    | 54451  | cleavage and polyadenylation specificity factor 3           | -1.37 | 0.66 | 0.33 |
| A_51_P145735 | NM_025421 | Acyp1    | 66204  | acylphosphatase 1, erythrocyte (common) type                | -1.19 | 0.66 | 0.67 |
| A_51_P319732 | NM_020560 | Mrps31   | 57312  | mitochondrial ribosomal protein S31                         | -1.48 | 0.66 | 0.20 |
| A_52_P500244 | NM_009730 | Atrn     | 11990  | attractin                                                   | -1.18 | 0.66 | 0.70 |
| A_52_P6505   | NM_026721 | Slc39a13 | 68427  | solute carrier family 39 (metal ion transporter), member 13 | -1.11 | 0.66 | 0.91 |
| A_52_P450808 | NM_013865 | Ndrp3    | 29812  | N-myc downstream regulated gene 3                           | -1.28 | 0.66 | 0.46 |
| A_52_P604526 | NM_026490 | Mrpl19   | 56284  | mitochondrial ribosomal protein L19                         | -1.31 | 0.66 | 0.44 |
| A_52_P397936 | AK077745  | Fam113a  | 319513 | family with sequence similarity 113, member A               | -1.45 | 0.66 | 0.22 |
| A_52_P476877 | NM_001024 | Rfx4     | 71137  | regulatory factor X, 4 (influences HLA class II expression) | -1.56 | 0.66 | 0.15 |
| A_52_P119792 | NM_145624 | Zfp709   | 236193 | zinc finger protein 709                                     | -1.15 | 0.66 | 0.82 |
| A_51_P327021 | NM_028356 | Zbtb25   | 109929 | zinc finger and BTB domain containing 25                    | -1.38 | 0.66 | 0.30 |
| A_52_P291971 | NM_025303 | Stau2    | 29819  | stau2 (RNA binding protein) homolog 2 (Drosophila)          | -1.19 | 0.66 | 0.67 |
| A_51_P369628 | NM_133949 | Ptov1    | 84113  | prostate tumor over expressed gene 1                        | -1.38 | 0.66 | 0.33 |
| A_51_P331870 | NM_028862 | Rnf145   | 74315  | ring finger protein 145                                     | -1.27 | 0.66 | 0.50 |
| A_52_P10664  | NM_172405 | Fam175a  | 70681  | family with sequence similarity 175, member A               | -1.13 | 0.66 | 0.86 |
| A_52_P409055 | BC078641  | Dcaf8    | 98193  | DDB1 and CUL4 associated factor 8                           | -1.30 | 0.66 | 0.44 |
| A_52_P528463 | NM_027122 | Mfsd3    | 69572  | major facilitator superfamily domain containing 3           | -1.27 | 0.66 | 0.50 |
| A_51_P165237 | NM_029068 | Snx16    | 74718  | sorting nexin 16                                            | -1.31 | 0.66 | 0.44 |
| A_51_P156274 | NM_010736 | Ltbr     | 17000  | lymphotoxin B receptor                                      | -1.53 | 0.66 | 0.17 |
| A_51_P104960 | NM_008947 | Psmc1    | 19179  | protease (prosome, macropain) 26S subunit, ATPase 1         | -1.55 | 0.66 | 0.16 |
| A_52_P46419  | NM_001038 | Grk6     | 26385  | G protein-coupled receptor kinase 6                         | -1.63 | 0.66 | 0.11 |
| A_51_P450632 | NM_013700 | Usp5     | 22225  | ubiquitin specific peptidase 5 (isopeptidase T)             | -1.53 | 0.66 | 0.17 |
| A_52_P6045   | NM_029522 | Gpsm2    | 76123  | G-protein signalling modulator 2 (AGS3-like, C. elegans)    | -1.14 | 0.66 | 0.82 |
| A_51_P434483 | NM_008281 | Hpn      | 15451  | hepsin                                                      | -1.46 | 0.66 | 0.21 |
| A_52_P581440 | NM_153423 | Wasf2    | 242687 | WAS protein family, member 2                                | -1.22 | 0.66 | 0.58 |
| A_52_P835189 | AK042010  | NA       | NA     | NA                                                          | -1.55 | 0.66 | 0.16 |
| A_51_P516637 | NM_007555 | Bmp5     | 12160  | bone morphogenetic protein 5                                | -1.32 | 0.66 | 0.40 |

|              |           |           |        |                                                                       |       |      |      |
|--------------|-----------|-----------|--------|-----------------------------------------------------------------------|-------|------|------|
| A_51_P384618 | NM_026144 | Dhdds     | 67422  | dehydrodolichyl diphosphate synthase                                  | -1.35 | 0.66 | 0.34 |
| A_51_P114002 | AK002213  | Gstm7     | 68312  | glutathione S-transferase, mu 7                                       | -1.26 | 0.66 | 0.50 |
| A_52_P147903 | NM_178709 | Rnf214    | 235315 | ring finger protein 214                                               | -1.43 | 0.66 | 0.24 |
| A_52_P110088 | NM_023247 | Ndufaf3   | 66706  | NADH dehydrogenase (ubiquinone) 1 alpha subcomplex, assembly factor 3 | -1.28 | 0.66 | 0.50 |
| A_52_P340480 | NM_175662 | Hist2h2ac | 319176 | histone cluster 2, H2ac                                               | -1.32 | 0.66 | 0.40 |
| A_51_P433843 | NM_001033 | Slc22a23  | 73102  | solute carrier family 22, member 23                                   | -1.34 | 0.66 | 0.37 |
| A_51_P278550 | NM_134118 | Tecr      | 106529 | trans-2,3-enoyl-CoA reductase                                         | -1.24 | 0.66 | 0.55 |
| A_51_P519364 | NM_145986 | Fam83f    | 213956 | family with sequence similarity 83, member F                          | -1.15 | 0.66 | 0.77 |
| A_51_P410892 | NM_026065 | D10Ert32  | 67270  | DNA segment, Chr 10, ERATO Doi 322, expressed                         | -1.45 | 0.66 | 0.22 |
| A_52_P111397 | NM_011062 | Pdpk1     | 18607  | 3-phosphoinositide dependent protein kinase-1                         | -1.37 | 0.66 | 0.33 |
| A_52_P98100  | AK161732  | Dcxr      | 67880  | dicarbonyl L-xylulose reductase                                       | -1.37 | 0.66 | 0.33 |
| A_51_P227022 | NM_019428 | Rpp30     | 54364  | ribonuclease P/MRP 30 subunit (human)                                 | -1.23 | 0.66 | 0.55 |
| A_51_P250017 | XM_485258 | NA        | NA     | NA                                                                    | -1.39 | 0.66 | 0.30 |
| A_52_P584975 | NM_134002 | Csnk1g2   | 103236 | casein kinase 1, gamma 2                                              | -1.44 | 0.66 | 0.24 |
| A_51_P265660 | NM_008017 | Smc2      | 14211  | structural maintenance of chromosomes 2                               | -1.08 | 0.66 | 1.04 |
| A_51_P203800 | NM_172691 | B230312A2 | 230088 | RIKEN cDNA B230312A22 gene                                            | -1.12 | 0.66 | 0.86 |
| A_51_P166044 | NM_011757 | Zscan21   | 22697  | zinc finger and SCAN domain containing 21                             | -1.23 | 0.66 | 0.55 |
| A_51_P123705 | NM_144858 | Dus3l     | 224907 | dihydrouridine synthase 3-like (S. cerevisiae)                        | -1.15 | 0.66 | 0.82 |
| A_52_P661587 | NM_001025 | 2610301F0 | 545428 | RIKEN cDNA 2610301F02 gene                                            | -1.53 | 0.66 | 0.17 |
| A_51_P202050 | NM_008052 | Dtx1      | 14357  | deltex 1 homolog (Drosophila)                                         | -1.45 | 0.66 | 0.22 |
| A_52_P150294 | AK009884  | Jkamp     | 104771 | JNK1/MAPK8-associated membrane protein                                | -1.53 | 0.66 | 0.17 |
| A_51_P368496 | NM_029537 | Tmem98    | 103743 | transmembrane protein 98                                              | -1.08 | 0.66 | 1.04 |
| A_51_P389864 | NM_178879 | B3gnt9    | 97440  | UDP-GlcNAc:betaGal beta-1,3-N-acetylglucosaminyltransferase 9         | -1.47 | 0.66 | 0.21 |
| A_51_P401683 | NM_145375 | Tm6sf1    | 107769 | transmembrane 6 superfamily member 1                                  | -1.48 | 0.66 | 0.20 |
| A_51_P196509 | NM_023900 | Plekhj1   | 78670  | pleckstrin homology domain containing, family J member 1              | -1.44 | 0.66 | 0.22 |
| A_52_P337679 | NM_007597 | Canx      | 12330  | calnexin                                                              | -1.33 | 0.66 | 0.40 |
| A_51_P452153 | NM_027222 | 2010001M0 | 69816  | RIKEN cDNA 2010001M09 gene                                            | -1.50 | 0.66 | 0.20 |
| A_52_P330950 | NM_174847 | C2cd2     | 207781 | C2 calcium-dependent domain containing 2                              | -1.20 | 0.66 | 0.61 |
| A_52_P231847 | NM_145949 | Ido2      | 209176 | indoleamine 2,3-dioxygenase 2                                         | -1.31 | 0.66 | 0.44 |
| A_52_P183979 | NM_027532 | 3200002M  | 75430  | RIKEN cDNA 3200002M19 gene                                            | -1.35 | 0.66 | 0.34 |



|              |           |          |        |                                                    |       |      |      |
|--------------|-----------|----------|--------|----------------------------------------------------|-------|------|------|
| A_51_P201971 | NM_030241 | Setd8    | 67956  | SET domain containing (lysine methyltransferase) 8 | -1.20 | 0.66 | 0.67 |
| A_51_P205481 | NM_144843 | Mtmr6    | 219135 | myotubularin related protein 6                     | -1.46 | 0.66 | 0.22 |
| A_51_P147714 | NM_172755 | Sfrs14   | 234373 | splicing factor, arginine/serine-rich 14           | -1.33 | 0.66 | 0.40 |
| A_51_P390078 | U34973    | Styx     | 56291  | serine/threonine/tyrosine interaction protein      | -1.30 | 0.66 | 0.44 |
| A_51_P412846 | NM_028889 | Efhd1    | 98363  | EF hand domain containing 1                        | -1.48 | 0.66 | 0.20 |
| A_51_P101086 | NM_027007 | Zfp397   | 69256  | zinc finger protein 397                            | -1.40 | 0.66 | 0.28 |
| A_51_P296182 | AK090207  | Slc43a2  | 215113 | solute carrier family 43, member 2                 | -1.26 | 0.66 | 0.53 |
| A_51_P178545 | NM_026028 | Ccdc77   | 67200  | coiled-coil domain containing 77                   | -1.34 | 0.66 | 0.37 |
|              |           |          |        | epidermal growth factor-containing fibulin-like    |       |      |      |
| A_51_P160544 | NM_021474 | Efemp2   | 58859  | extracellular matrix protein 2                     | -1.27 | 0.66 | 0.50 |
| A_52_P92302  | AK089427  | Dnajb12  | 56709  | DnaJ (Hsp40) homolog, subfamily B, member 12       | -1.18 | 0.66 | 0.70 |
| A_52_P559126 | NM_019665 | Arl6     | 56297  | ADP-ribosylation factor-like 6                     | -1.18 | 0.66 | 0.67 |
| A_51_P300281 | NM_009898 | Coro1a   | 12721  | coronin, actin binding protein 1A                  | -1.36 | 0.66 | 0.33 |
| A_52_P16873  | AK041479  | Rasal3   | 320484 | RAS protein activator like 3                       | -1.07 | 0.66 | 1.04 |
| A_51_P394973 | NM_026598 | Ebpl     | 68177  | emopamil binding protein-like                      | -1.28 | 0.66 | 0.46 |
| A_52_P191527 | AK129130  | Rnmt     | 67897  | RNA (guanine-7-) methyltransferase                 | -1.42 | 0.66 | 0.27 |
| A_51_P480904 | NM_178645 | Blmh     | 104184 | bleomycin hydrolase                                | -1.29 | 0.66 | 0.46 |
| A_51_P159814 | NM_029945 | Smpd4    | 77626  | sphingomyelin phosphodiesterase 4                  | -1.15 | 0.66 | 0.77 |
| A_52_P377126 | AK009886  | 2310047M | 71923  | RIKEN cDNA 2310047M10 gene                         | -1.08 | 0.66 | 1.04 |
| A_51_P168392 | NM_030188 | Ttc30a1  | 78802  | tetratricopeptide repeat domain 30A1               | -1.18 | 0.66 | 0.67 |
|              |           |          |        | SWI/SNF related matrix associated, actin dependent |       |      |      |
| A_51_P438293 | AK133701  | Smarca1  | 54380  | regulator of chromatin, subfamily a-like 1         | -1.55 | 0.66 | 0.16 |
| A_52_P87513  | NA        | NA       | NA     | NA                                                 | -1.25 | 0.66 | 0.55 |
| A_52_P377941 | NM_153179 | Pkhd1    | 241035 | polycystic kidney and hepatic disease 1            | -1.54 | 0.66 | 0.17 |
| A_52_P279152 | NM_016794 | Vamp8    | 22320  | vesicle-associated membrane protein 8              | -1.37 | 0.66 | 0.33 |
| A_52_P490863 | NM_025403 | Nop10    | 66181  | NOP10 ribonucleoprotein homolog (yeast)            | -1.50 | 0.66 | 0.20 |
| A_52_P139629 | NM_028376 | Pfn4     | 382562 | profilin family, member 4                          | -1.42 | 0.66 | 0.27 |
| A_52_P446237 | NM_178912 | Fancm    | 104806 | Fanconi anemia, complementation group M            | -1.21 | 0.66 | 0.61 |
| A_51_P236197 | NM_009088 | Polr1a   | 20019  | polymerase (RNA) I polypeptide A                   | -1.27 | 0.66 | 0.50 |
| A_52_P126162 | NM_019880 | Mtch1    | 56462  | mitochondrial carrier homolog 1 (C. elegans)       | -1.59 | 0.66 | 0.14 |
| A_52_P492142 | NM_170758 | Cd300a   | 217303 | CD300A antigen                                     | -1.48 | 0.66 | 0.20 |
| A_51_P311965 | NM_009298 | Surf6    | 20935  | surfeit gene 6                                     | -1.23 | 0.66 | 0.58 |

| Accession    | Gene ID   | Gene Name | Protein ID | Protein Name                                                                 | Log2 Fold Change | Adjusted P-value | Q-value |
|--------------|-----------|-----------|------------|------------------------------------------------------------------------------|------------------|------------------|---------|
|              |           |           |            | eukaryotic translation initiation factor 2B, subunit 5                       |                  |                  |         |
| A_51_P151968 | NM_172265 | Eif2b5    | 224045     | epsilon                                                                      | -1.41            | 0.66             | 0.27    |
| A_52_P924229 | AK085674  | NA        | NA         | NA                                                                           | -1.31            | 0.66             | 0.44    |
| A_51_P351009 | NM_028334 | Nup37     | 69736      | nucleoporin 37                                                               | -1.47            | 0.66             | 0.21    |
| A_52_P201531 | AK029836  | Myo9a     | 270163     | myosin IXa                                                                   | -1.09            | 0.66             | 0.97    |
| A_51_P121390 | NM_001038 | Anapc11   | 66156      | anaphase promoting complex subunit 11                                        | -1.34            | 0.66             | 0.37    |
| A_51_P196395 | NM_026502 | 1110004E0 | 68001      | RIKEN cDNA 1110004E09 gene                                                   | -1.34            | 0.66             | 0.37    |
| A_51_P518959 | NA        | NA        | NA         | NA                                                                           | -1.38            | 0.66             | 0.30    |
| A_52_P657324 | NM_021470 | Rnf32     | 56874      | ring finger protein 32                                                       | -1.36            | 0.66             | 0.34    |
| A_52_P795929 | AK081614  | NA        | NA         | NA                                                                           | -1.26            | 0.66             | 0.53    |
| A_52_P204348 | NM_175128 | 4930430F0 | 68281      | RIKEN cDNA 4930430F08 gene                                                   | -1.09            | 0.66             | 0.97    |
| A_52_P475653 | AK077587  | Dnajb4    | 67035      | DnaJ (Hsp40) homolog, subfamily B, member 4                                  | -1.07            | 0.66             | 1.04    |
| A_51_P128148 | NM_145606 | Chmp1a    | 234852     | chromatin modifying protein 1A                                               | -1.10            | 0.66             | 0.91    |
| A_51_P430263 | NM_133900 | Psph      | 100678     | phosphoserine phosphatase                                                    | -1.16            | 0.66             | 0.77    |
| A_52_P472799 | NM_027475 | Ecd       | 70601      | ecdysoneless homolog (Drosophila)                                            | -1.28            | 0.66             | 0.50    |
| A_51_P466180 | NM_010299 | Gm2a      | 14667      | GM2 ganglioside activator protein                                            | -1.27            | 0.66             | 0.50    |
| A_51_P181671 | L23423    | Itga7     | 16404      | integrin alpha 7                                                             | -1.43            | 0.66             | 0.24    |
| A_52_P32466  | NM_026553 | Yif1a     | 68090      | Yip1 interacting factor homolog A (S. cerevisiae)                            | -1.16            | 0.66             | 0.77    |
| A_51_P435333 | NM_027151 | Dctn2     | 69654      | dynactin 2                                                                   | -1.42            | 0.66             | 0.27    |
|              |           |           |            | calcium/calmodulin-dependent protein kinase kinase 1, alpha                  |                  |                  |         |
| A_51_P208330 | NM_018883 | Camkk1    | 55984      | alpha                                                                        | -1.30            | 0.65             | 0.44    |
| A_51_P351697 | NM_025430 | Mrpl35    | 66223      | mitochondrial ribosomal protein L35                                          | -1.47            | 0.65             | 0.21    |
| A_51_P174422 | NM_013761 | Srr       | 27364      | serine racemase                                                              | -1.51            | 0.65             | 0.18    |
| A_52_P583050 | NM_181649 | Ccdc75    | 53951      | coiled-coil domain containing 75                                             | -1.16            | 0.65             | 0.77    |
|              |           |           |            | membrane-bound transcription factor peptidase, site 1                        |                  |                  |         |
| A_52_P406482 | NM_019709 | Mbtps1    | 56453      | membrane-bound transcription factor peptidase, site 1                        | -1.22            | 0.65             | 0.58    |
| A_51_P185292 | AK019824  | 4930581F2 | 78934      | RIKEN cDNA 4930581F22 gene                                                   | -1.25            | 0.65             | 0.55    |
| A_52_P479683 | NM_008297 | Hsf2      | 15500      | heat shock factor 2                                                          | -1.22            | 0.65             | 0.58    |
|              |           |           |            | hydroxy-delta-5-steroid dehydrogenase, 3 beta- and steroid delta-isomerase 2 |                  |                  |         |
| A_52_P339759 | NM_153193 | Hsd3b2    | 15493      | hydroxy-delta-5-steroid dehydrogenase, 3 beta- and steroid delta-isomerase 2 | -1.21            | 0.65             | 0.61    |
| A_52_P450918 | NM_144538 | Rab3il1   | 74760      | RAB3A interacting protein (rabin3)-like 1                                    | -1.27            | 0.65             | 0.50    |
| A_51_P463087 | NM_178269 | Cenpm     | 66570      | centromere protein M                                                         | -1.31            | 0.65             | 0.44    |
|              |           |           |            | Williams Beuren syndrome chromosome region 22                                |                  |                  |         |
| A_51_P456590 | NM_025375 | Wbscr22   | 66138      | Williams Beuren syndrome chromosome region 22                                | -1.37            | 0.65             | 0.33    |

|              |           |           |        |                                                                                                        |       |      |      |
|--------------|-----------|-----------|--------|--------------------------------------------------------------------------------------------------------|-------|------|------|
| A_52_P432904 | NM_001003 | Ddx11     | 320209 | DEAD/H (Asp-Glu-Ala-Asp/His) box polypeptide 11<br>(CHL1-like helicase homolog, <i>S. cerevisiae</i> ) | -1.45 | 0.65 | 0.22 |
| A_51_P165870 | NM_008750 | Nxn       | 18230  | nucleoredoxin                                                                                          | -1.37 | 0.65 | 0.33 |
| A_51_P359485 | NM_024231 | Zfp1      | 81909  | zinc finger like protein 1                                                                             | -1.22 | 0.65 | 0.58 |
| A_52_P335259 | NM_144536 | Cdkal1    | 68916  | CDK5 regulatory subunit associated protein 1-like 1                                                    | -1.43 | 0.65 | 0.24 |
| A_51_P200529 | NM_138670 | Mpst      | 246221 | mercaptopyruvate sulfurtransferase                                                                     | -1.18 | 0.65 | 0.67 |
| A_52_P102642 | NM_198020 | Trmt1     | 212528 | TRM1 tRNA methyltransferase 1 homolog ( <i>S. cerevisiae</i> )                                         | -1.33 | 0.65 | 0.37 |
| A_52_P466788 | NM_133673 | Tor1b     | 30934  | torsin family 1, member B                                                                              | -1.13 | 0.65 | 0.86 |
| A_51_P381387 | NM_153415 | Pomt2     | 217734 | protein-O-mannosyltransferase 2                                                                        | -1.11 | 0.65 | 0.91 |
| A_52_P571938 | NM_026855 | Arv1      | 68865  | ARV1 homolog (yeast)                                                                                   | -1.49 | 0.65 | 0.20 |
| A_51_P484983 | NM_023224 | Cblc      | 80794  | Casitas B-lineage lymphoma c                                                                           | -1.51 | 0.65 | 0.18 |
| A_52_P180152 | AK034016  | 9030407P2 | 71568  | RIKEN cDNA 9030407P20 gene                                                                             | -1.54 | 0.65 | 0.16 |
| A_52_P27918  | NM_001029 | Atad5     | 237877 | ATPase family, AAA domain containing 5<br>carcinoembryonic antigen-related cell adhesion<br>molecule 1 | -1.27 | 0.65 | 0.50 |
| A_52_P240706 | NM_001039 | Ceacam1   | 26365  | molecule 1                                                                                             | -1.50 | 0.65 | 0.20 |
| A_51_P399062 | NM_027777 | Pex1      | 71382  | peroxisomal biogenesis factor 1<br>protein kinase, interferon inducible double stranded                | -1.44 | 0.65 | 0.22 |
| A_51_P345836 | NM_011871 | Prkra     | 23992  | RNA dependent activator                                                                                | -1.42 | 0.65 | 0.27 |
| A_51_P450812 | NM_133973 | Cog4      | 102339 | component of oligomeric golgi complex 4                                                                | -1.44 | 0.65 | 0.24 |
| A_51_P221998 | NM_207237 | Man1c1    | 230815 | mannosidase, alpha, class 1C, member 1                                                                 | -1.54 | 0.65 | 0.16 |
| A_52_P434934 | NM_177215 | Ocrl      | 320634 | oculocerebrorenal syndrome of Lowe                                                                     | -1.44 | 0.65 | 0.24 |
| A_52_P261249 | NM_148926 | Zfand3    | 21769  | zinc finger, AN1-type domain 3                                                                         | -1.31 | 0.65 | 0.44 |
| A_51_P249414 | NM_022408 | Dgcr14    | 27886  | DiGeorge syndrome critical region gene 14                                                              | -1.63 | 0.65 | 0.11 |
| A_51_P501159 | NM_198020 | Trmt1     | 212528 | TRM1 tRNA methyltransferase 1 homolog ( <i>S. cerevisiae</i> )                                         | -1.51 | 0.65 | 0.18 |
| A_51_P260490 | NM_009067 | Ralbp1    | 19765  | ralA binding protein 1                                                                                 | -1.61 | 0.65 | 0.13 |
| A_51_P127464 | NM_199149 | Lrrc68    | 232947 | leucine rich repeat containing 68                                                                      | -1.50 | 0.65 | 0.20 |
| A_51_P344566 | NM_011121 | Plk1      | 18817  | polo-like kinase 1 ( <i>Drosophila</i> )                                                               | -1.11 | 0.65 | 0.91 |
| A_51_P505337 | AK002846  | Preli1    | 66494  | PRELI domain containing 1                                                                              | -1.44 | 0.65 | 0.22 |
| A_51_P320593 | NM_027185 | Def6      | 23853  | differentially expressed in FDCP 6                                                                     | -1.45 | 0.65 | 0.22 |
| A_51_P346871 | NM_018854 | Ift20     | 55978  | intraflagellar transport 20 homolog ( <i>Chlamydomonas</i> )                                           | -1.37 | 0.65 | 0.33 |

|               |           |           |        |                                                                                                                       |       |      |      |
|---------------|-----------|-----------|--------|-----------------------------------------------------------------------------------------------------------------------|-------|------|------|
| A_51_P159552  | AK159076  | Sin3b     | 20467  | transcriptional regulator, SIN3B (yeast)                                                                              | -1.13 | 0.65 | 0.86 |
| A_51_P416397  | NM_145476 | Tbc1d22a  | 223754 | TBC1 domain family, member 22a                                                                                        | -1.64 | 0.65 | 0.11 |
| A_51_P399873  | NM_001033 | Acmsd     | 266645 | amino carboxymuconate semialdehyde decarboxylase                                                                      | -1.30 | 0.65 | 0.46 |
| A_52_P465386  | NA        | NA        | NA     | NA                                                                                                                    | -1.22 | 0.65 | 0.61 |
| A_52_P860257  | AK085706  | BB042571  | 105057 | expressed sequence BB042571                                                                                           | -1.28 | 0.65 | 0.46 |
| A_52_P1188205 | AK048968  | NA        | NA     | NA                                                                                                                    | -1.46 | 0.65 | 0.21 |
| A_52_P577729  | BC062943  | Rnf169    | 108937 | ring finger protein 169                                                                                               | -1.33 | 0.65 | 0.40 |
| A_52_P429749  | NM_019704 | Tmem115   | 56395  | transmembrane protein 115                                                                                             | -1.32 | 0.65 | 0.40 |
| A_51_P165156  | AK016716  | Polr3c    | 74414  | polymerase (RNA) III (DNA directed) polypeptide C                                                                     | -1.38 | 0.65 | 0.33 |
| A_51_P323397  | AK006854  | 170006111 | 433646 | RIKEN cDNA 1700061117 gene                                                                                            | -1.43 | 0.65 | 0.24 |
| A_52_P844036  | AK086877  | NA        | NA     | NA                                                                                                                    | -1.27 | 0.65 | 0.50 |
| A_52_P173673  | BC091647  | Ankhd1    | 108857 | ankyrin repeat and KH domain containing 1                                                                             | -1.36 | 0.65 | 0.34 |
| A_52_P13537   | NM_018864 | Impa1     | 55980  | inositol (myo)-1(or 4)-monophosphatase 1                                                                              | -1.69 | 0.65 | 0.09 |
| A_51_P331246  | AK168159  | Polr2l    | 66491  | polymerase (RNA) II (DNA directed) polypeptide L<br>processing of precursor 1, ribonuclease P/MRP family,             | -1.30 | 0.65 | 0.44 |
| A_51_P322910  | NM_026340 | Pop1      | 67724  | (S. cerevisiae)                                                                                                       | -1.20 | 0.65 | 0.67 |
| A_51_P141110  | NM_026082 | Dock7     | 67299  | dedicator of cytokinesis 7                                                                                            | -1.27 | 0.65 | 0.50 |
| A_52_P488779  | NM_001024 | Pilrb2    | 545812 | paired immunoglobulin-like type 2 receptor beta 2                                                                     | -1.65 | 0.65 | 0.11 |
| A_52_P416727  | NM_153794 | 4933403F0 | 108654 | RIKEN cDNA 4933403F05 gene                                                                                            | -1.35 | 0.65 | 0.34 |
| A_51_P440657  | NM_019837 | Nudt3     | 56409  | nudix (nucleotide diphosphate linked moiety X)-type<br>motif 3<br>required for meiotic nuclear division 1 homolog (S. | -1.47 | 0.65 | 0.20 |
| A_51_P147562  | NM_025343 | Rmnd1     | 66084  | cerevisiae)                                                                                                           | -1.32 | 0.65 | 0.40 |
| A_52_P426740  | NM_023635 | Rab27a    | 11891  | RAB27A, member RAS oncogene family                                                                                    | -1.27 | 0.65 | 0.50 |
| A_51_P273130  | NM_030116 | Mrpl9     | 78523  | mitochondrial ribosomal protein L9                                                                                    | -1.43 | 0.65 | 0.24 |
| A_52_P1022311 | BC039142  | NA        | NA     | NA                                                                                                                    | -1.39 | 0.65 | 0.30 |
| A_52_P306162  | NM_153399 | Syne1     | 64009  | synaptic nuclear envelope 1                                                                                           | -1.36 | 0.65 | 0.34 |
| A_52_P159077  | NM_011734 | Siae      | 22619  | sialic acid acetyltransferase                                                                                         | -1.52 | 0.65 | 0.18 |
| A_51_P289507  | NM_172519 | Dis3l     | 213550 | DIS3 mitotic control homolog (S. cerevisiae)-like                                                                     | -1.64 | 0.65 | 0.11 |
| A_51_P287756  | NM_009553 | Zscan2    | 22691  | zinc finger and SCAN domain containing 2                                                                              | -1.31 | 0.65 | 0.44 |

|               |           |           |         |                                                                                         |       |      |      |
|---------------|-----------|-----------|---------|-----------------------------------------------------------------------------------------|-------|------|------|
|               |           |           |         | 5-methyltetrahydrofolate-homocysteine                                                   |       |      |      |
| A_52_P296208  | NM_172480 | Mtrr      | 210009  | methyltransferase reductase                                                             | -1.42 | 0.65 | 0.27 |
| A_51_P487331  | AK016544  | 4932433NC | 74384   | RIKEN cDNA 4932433N03 gene                                                              | -1.39 | 0.65 | 0.30 |
| A_52_P594927  | NM_146091 | Atl3      | 109168  | atlastin GTPase 3                                                                       | -1.44 | 0.65 | 0.22 |
| A_51_P325071  | NM_010949 | Numb      | 18222   | numb gene homolog (Drosophila)                                                          | -1.40 | 0.65 | 0.28 |
| A_52_P243249  | NM_011952 | Mapk3     | 26417   | mitogen-activated protein kinase 3                                                      | -1.35 | 0.65 | 0.34 |
| A_51_P313532  | NM_027154 | Tmbim1    | 69660   | transmembrane BAX inhibitor motif containing 1                                          | -1.34 | 0.65 | 0.37 |
| A_51_P193612  | NM_175260 | Myh10     | 77579   | myosin, heavy polypeptide 10, non-muscle                                                | -1.32 | 0.65 | 0.40 |
| A_52_P40257   | NM_007652 | Cd59a     | 12509   | CD59a antigen                                                                           | -1.25 | 0.65 | 0.53 |
| A_51_P329879  | NM_028095 | Mettl10   | 72096   | methyltransferase like 10                                                               | -1.18 | 0.65 | 0.70 |
| A_51_P408162  | NM_175277 | Bola3     | 78653   | bolA-like 3 (E. coli)                                                                   | -1.34 | 0.65 | 0.37 |
| A_52_P124173  | NM_172151 | Zdhhc8    | 27801   | zinc finger, DHHC domain containing 8                                                   | -1.16 | 0.65 | 0.77 |
| A_52_P419059  | NA        | NA        | NA      | NA                                                                                      | -1.45 | 0.65 | 0.22 |
| A_51_P130015  | NM_007900 | Ect2      | 13605   | ect2 oncogene                                                                           | -1.33 | 0.65 | 0.40 |
| A_52_P91724   | NM_026353 | Slc48a1   | 67739   | solute carrier family 48 (heme transporter), member 1                                   | -1.54 | 0.65 | 0.16 |
| A_52_P1131944 | AK037456  | A130019P1 | 1399617 | RIKEN cDNA A130019P10 gene                                                              | -1.10 | 0.65 | 0.97 |
| A_51_P298514  | NM_177345 | Mapkap1   | 227743  | mitogen-activated protein kinase associated protein 1                                   | -1.25 | 0.65 | 0.53 |
| A_51_P101545  | NM_019447 | Hgfac     | 54426   | hepatocyte growth factor activator                                                      | -1.36 | 0.65 | 0.34 |
| A_52_P311129  | NM_025911 | Ccdc91    | 67015   | coiled-coil domain containing 91                                                        | -1.36 | 0.65 | 0.34 |
| A_51_P340816  | NM_008389 | Ipp       | 16351   | IAP promoted placental gene                                                             | -1.29 | 0.65 | 0.46 |
| A_51_P462428  | NM_030166 | Galnt12   | 78754   | UDP-N-acetyl-alpha-D-galactosamine:polypeptide N-acetylgalactosaminyltransferase-like 2 | -1.22 | 0.65 | 0.58 |
| A_51_P125135  | NM_026410 | Cdca5     | 67849   | cell division cycle associated 5                                                        | -1.12 | 0.65 | 0.86 |
| A_51_P214306  | NM_145462 | Haus4     | 219072  | HAUS augmin-like complex, subunit 4                                                     | -1.10 | 0.65 | 0.97 |
| A_51_P454166  | NM_010829 | Msh3      | 17686   | mutS homolog 3 (E. coli)                                                                | -1.22 | 0.65 | 0.61 |
| A_52_P90289   | NM_010952 | Oaz2      | 18247   | ornithine decarboxylase antizyme 2                                                      | -1.49 | 0.65 | 0.20 |
| A_51_P363763  | NM_019434 | Mcm3ap    | 54387   | minichromosome maintenance deficient 3 (S. cerevisiae) associated protein               | -1.33 | 0.65 | 0.40 |
| A_51_P400659  | NM_007530 | Bcap29    | 12033   | B-cell receptor-associated protein 29                                                   | -1.41 | 0.65 | 0.27 |
| A_51_P461123  | XM_916118 | NA        | NA      | NA                                                                                      | -1.38 | 0.65 | 0.30 |
| A_52_P676063  | NM_026734 | Tmem126b  | 68472   | transmembrane protein 126B                                                              | -1.23 | 0.65 | 0.58 |

|              |           |           |        |                                                                  |       |      |      |
|--------------|-----------|-----------|--------|------------------------------------------------------------------|-------|------|------|
| A_51_P153486 | NM_018808 | Dnajb1    | 81489  | Dnaj (Hsp40) homolog, subfamily B, member 1                      | -1.32 | 0.65 | 0.40 |
| A_51_P406414 | NM_010470 | Hp1bp3    | 15441  | heterochromatin protein 1, binding protein 3                     | -1.84 | 0.65 | 0.04 |
| A_51_P349023 | NM_026309 | Lsm3      | 67678  | LSM3 homolog, U6 small nuclear RNA associated (S. cerevisiae)    | -1.08 | 0.65 | 1.04 |
| A_52_P335326 | XM_130859 | Pgrmc2    | 70804  | progesterone receptor membrane component 2                       | -1.17 | 0.65 | 0.70 |
| A_51_P494446 | NM_001025 | Tmem201   | 230917 | transmembrane protein 201                                        | -1.58 | 0.65 | 0.15 |
| A_52_P699185 | AK035263  | NA        | NA     | NA                                                               | -1.49 | 0.65 | 0.20 |
| A_52_P181733 | NM_153560 | Fam102a   | 98952  | family with sequence similarity 102, member A                    | -1.27 | 0.65 | 0.50 |
| A_52_P39546  | NM_011565 | Tead2     | 21677  | TEA domain family member 2                                       | -1.67 | 0.65 | 0.10 |
| A_51_P342877 | NM_011322 | Scn1b     | 20266  | sodium channel, voltage-gated, type I, beta                      | -1.66 | 0.65 | 0.11 |
| A_51_P447866 | NM_028773 | Sash3     | 74131  | SAM and SH3 domain containing 3                                  | -1.56 | 0.65 | 0.15 |
| A_52_P166694 | NM_009496 | Vamp1     | 22317  | vesicle-associated membrane protein 1                            | -1.33 | 0.65 | 0.37 |
| A_51_P407660 | NM_177003 | 9630033F2 | 319801 | RIKEN cDNA 9630033F20 gene                                       | -1.29 | 0.65 | 0.46 |
| A_51_P272735 | XM_981000 | NA        | NA     | NA                                                               | -1.53 | 0.65 | 0.17 |
| A_51_P121527 | NM_026680 | Golt1a    | 68338  | golgi transport 1 homolog A (S. cerevisiae)                      | -1.42 | 0.65 | 0.24 |
| A_52_P147730 | NM_001039 | Evi5l     | 213027 | ecotropic viral integration site 5 like                          | -1.38 | 0.65 | 0.33 |
| A_51_P477627 | NM_146170 | C87436    | 232196 | expressed sequence C87436                                        | -1.36 | 0.65 | 0.34 |
| A_52_P682982 | NM_013742 | Cars      | 27267  | cysteinyl-tRNA synthetase                                        | -1.08 | 0.65 | 0.97 |
| A_52_P661044 | NM_009914 | Ccr3      | 12771  | chemokine (C-C motif) receptor 3                                 | -1.08 | 0.65 | 1.04 |
| A_51_P398343 | NM_011749 | Zfp148    | 22661  | zinc finger protein 148                                          | -1.35 | 0.65 | 0.34 |
| A_51_P405773 | NM_175658 | Hist1h2aa | 319163 | histone cluster 1, H2aa                                          | -1.58 | 0.65 | 0.15 |
| A_51_P124951 | NM_025296 | Ciao1     | 26371  | cytosolic iron-sulfur protein assembly 1 homolog (S. cerevisiae) | -1.45 | 0.65 | 0.22 |
| A_51_P145376 | NM_001025 | Otud7b    | 229603 | OTU domain containing 7B                                         | -1.61 | 0.65 | 0.13 |
| A_51_P518926 | AK009886  | 2310047M  | 71923  | RIKEN cDNA 2310047M10 gene                                       | -1.33 | 0.65 | 0.40 |
| A_52_P420479 | NM_010402 | Hand2     | 15111  | heart and neural crest derivatives expressed transcript 2        | -1.27 | 0.65 | 0.50 |
| A_51_P359137 | NM_021791 | Doc2g     | 60425  | double C2, gamma                                                 | -1.29 | 0.65 | 0.46 |
| A_51_P289506 | AK151780  | Dis3l     | 213550 | DIS3 mitotic control homolog (S. cerevisiae)-like                | -1.24 | 0.65 | 0.55 |
| A_51_P210395 | NM_053108 | Glrx      | 93692  | glutaredoxin                                                     | -1.23 | 0.65 | 0.58 |
| A_52_P249611 | NM_021313 | Rnf25     | 57751  | ring finger protein 25                                           | -1.57 | 0.65 | 0.15 |
| A_52_P577361 | NM_199198 | Hdac10    | 170787 | histone deacetylase 10                                           | -1.63 | 0.65 | 0.11 |
| A_52_P164928 | NM_001047 | Ttc21b    | 73668  | tetratricopeptide repeat domain 21B                              | -1.42 | 0.65 | 0.27 |

|              |           |            |        |                                                                                                        |       |      |      |
|--------------|-----------|------------|--------|--------------------------------------------------------------------------------------------------------|-------|------|------|
| A_52_P114722 | NM_001077 | Ptpn6      | 15170  | protein tyrosine phosphatase, non-receptor type 6<br>CTF18, chromosome transmission fidelity factor 18 | -1.58 | 0.65 | 0.15 |
| A_51_P208680 | NM_145409 | Chtf18     | 214901 | homolog ( <i>S. cerevisiae</i> )                                                                       | -1.41 | 0.65 | 0.27 |
| A_51_P160913 | NM_008209 | Mr1        | 15064  | major histocompatibility complex, class I-related                                                      | -1.44 | 0.65 | 0.22 |
| A_51_P240019 | NM_013755 | Gyg        | 27357  | glycogenin                                                                                             | -1.26 | 0.65 | 0.53 |
| A_51_P231738 | NM_020566 | Dnajc4     | 57431  | Dnal (Hsp40) homolog, subfamily C, member 4                                                            | -1.54 | 0.65 | 0.16 |
| A_52_P479539 | AK047894  | Cit        | 12704  | citron                                                                                                 | -1.60 | 0.65 | 0.14 |
| A_52_P527637 | NM_024414 | Stx1b      | 56216  | syntaxin 1B                                                                                            | -1.59 | 0.65 | 0.14 |
| A_51_P232355 | NM_008950 | Psmc5      | 19184  | protease (prosome, macropain) 26S subunit, ATPase 5                                                    | -1.57 | 0.65 | 0.15 |
| A_51_P495700 | NM_025455 | Ccdc28b    | 66264  | coiled coil domain containing 28B                                                                      | -1.36 | 0.65 | 0.33 |
| A_51_P390586 | NM_027478 | 5730494N06 | 70612  | RIKEN cDNA 5730494N06 gene                                                                             | -1.79 | 0.65 | 0.06 |
| A_52_P604613 | NM_010333 | S1pr2      | 14739  | sphingosine-1-phosphate receptor 2                                                                     | -1.28 | 0.65 | 0.46 |
| A_52_P303235 | AK008788  | Ndufab1    | 70316  | NADH dehydrogenase (ubiquinone) 1, alpha/beta<br>subcomplex, 1                                         | -1.30 | 0.65 | 0.44 |
| A_51_P130427 | NM_009439 | Psmc3      | 22123  | proteasome (prosome, macropain) 26S subunit, non-<br>ATPase, 3                                         | -1.35 | 0.65 | 0.34 |
| A_51_P366290 | NM_001033 | 6430526N21 | 319748 | RIKEN cDNA 6430526N21 gene                                                                             | -1.56 | 0.65 | 0.15 |
| A_51_P434171 | BC060115  | Myo19      | 66196  | myosin XIX                                                                                             | -1.18 | 0.65 | 0.70 |
| A_52_P373205 | AK173175  | Scaper     | 244891 | S phase cyclin A-associated protein in the ER                                                          | -1.10 | 0.65 | 0.97 |
| A_51_P515120 | NM_178870 | Hs3st3a1   | 15478  | heparan sulfate (glucosamine) 3-O-sulfotransferase 3A1                                                 | -1.41 | 0.65 | 0.27 |
| A_52_P302291 | NM_029017 | Mrpl47     | 74600  | mitochondrial ribosomal protein L47                                                                    | -1.29 | 0.65 | 0.46 |
| A_51_P165330 | NM_025796 | Mrpl33     | 66845  | mitochondrial ribosomal protein L33                                                                    | -1.35 | 0.65 | 0.34 |
| A_52_P527106 | NM_001039 | Arhgap12   | 75415  | Rho GTPase activating protein 12                                                                       | -1.22 | 0.65 | 0.58 |
| A_52_P359061 | NM_019410 | Pfn2       | 18645  | profilin 2                                                                                             | -1.09 | 0.65 | 0.97 |
| A_52_P252539 | AK028070  | Ndufb8     | 67264  | NADH dehydrogenase (ubiquinone) 1 beta subcomplex<br>8                                                 | -1.48 | 0.65 | 0.20 |
| A_51_P401987 | NM_019432 | Tmem37     | 170706 | transmembrane protein 37                                                                               | -1.41 | 0.65 | 0.27 |
| A_51_P367343 | NM_013716 | G3bp1      | 27041  | Ras-GTPase-activating protein SH3-domain binding<br>protein 1                                          | -1.27 | 0.65 | 0.50 |
| A_52_P478790 | NA        | NA         | NA     | NA                                                                                                     | -1.37 | 0.65 | 0.33 |
| A_52_P280448 | NA        | NA         | NA     | NA                                                                                                     | -1.40 | 0.65 | 0.28 |

|              |           |                 |        |                                                                                                             |       |      |      |
|--------------|-----------|-----------------|--------|-------------------------------------------------------------------------------------------------------------|-------|------|------|
| A_51_P307232 | NM_010629 | Kifap3          | 16579  | kinesin-associated protein 3                                                                                | -1.33 | 0.65 | 0.40 |
| A_51_P328932 | NM_011626 | Tmem165         | 21982  | transmembrane protein 165                                                                                   | -1.24 | 0.65 | 0.55 |
| A_52_P323936 | NM_145952 | Tbc1d12         | 209478 | TBC1D12: TBC1 domain family, member 12                                                                      | -1.14 | 0.65 | 0.82 |
| A_52_P241742 | AK008077  | 2010003O066434  |        | RIKEN cDNA 2010003O02 gene                                                                                  | -1.14 | 0.65 | 0.82 |
| A_52_P39157  | NM_007552 | Bmi1            | 12151  | Bmi1 polycomb ring finger oncogene                                                                          | -1.70 | 0.65 | 0.09 |
| A_51_P205833 | NM_007531 | Phb2            | 12034  | prohibitin 2                                                                                                | -1.43 | 0.65 | 0.24 |
| A_51_P459873 | AK018157  | 6330411E070733  |        | RIKEN cDNA 6330411E07 gene                                                                                  | -1.67 | 0.65 | 0.10 |
| A_51_P509339 | XM_132005 | NA              | NA     | NA                                                                                                          | -1.31 | 0.65 | 0.40 |
| A_52_P1367   | AK162987  | Ets1            | 23871  | E26 avian leukemia oncogene 1, 5' domain                                                                    | -1.37 | 0.65 | 0.33 |
| A_52_P281711 | NM_027113 | Wdr5b           | 69544  | WD repeat domain 5B                                                                                         | -1.29 | 0.65 | 0.46 |
| A_52_P171212 | NM_010570 | Irs1            | 16367  | insulin receptor substrate 1                                                                                | -1.27 | 0.65 | 0.50 |
| A_52_P78746  | NM_010617 | Kif13a          | 16553  | kinesin family member 13A                                                                                   | -1.16 | 0.65 | 0.77 |
| A_51_P437549 | NM_001039 | Klhl20          | 226541 | kelch-like 20 (Drosophila)                                                                                  | -1.31 | 0.65 | 0.44 |
| A_52_P316644 | NM_009748 | Bet1            | 12068  | blocked early in transport 1 homolog (S. cerevisiae)                                                        | -1.27 | 0.65 | 0.50 |
| A_51_P249627 | NM_029791 | Bicd2           | 76895  | bicaudal D homolog 2 (Drosophila)                                                                           | -1.43 | 0.65 | 0.24 |
| A_51_P172532 | NM_012049 | Nit1            | 27045  | nitrilase 1                                                                                                 | -1.53 | 0.65 | 0.17 |
| A_52_P239292 | NM_133818 | AI597479        | 98404  | expressed sequence AI597479                                                                                 | -1.47 | 0.65 | 0.21 |
| A_51_P174016 | NM_008202 | Slc39a7         | 14977  | solute carrier family 39 (zinc transporter), member 7                                                       | -1.23 | 0.65 | 0.58 |
| A_52_P606924 | NM_172714 | Lin54           | 231506 | lin-54 homolog (C. elegans)                                                                                 | -1.65 | 0.65 | 0.11 |
| A_51_P410361 | NM_001039 | Lin7a           | 108030 | lin-7 homolog A (C. elegans)                                                                                | -1.21 | 0.65 | 0.61 |
| A_52_P522372 | NM_175503 | Aard            | 239435 | alanine and arginine rich domain containing protein<br>mannoside acetylglucosaminyltransferase 4, isoenzyme | -1.66 | 0.65 | 0.11 |
| A_51_P268033 | BC026638  | Mgat4b          | 103534 | B                                                                                                           | -1.86 | 0.65 | 0.04 |
| A_51_P488422 | NM_029475 | Adal            | 75894  | adenosine deaminase-like<br>pleckstrin homology domain containing, family O                                 | -1.09 | 0.65 | 0.97 |
| A_51_P509971 | NM_023320 | Plekho1         | 67220  | member 1                                                                                                    | -1.33 | 0.65 | 0.40 |
| A_52_P619200 | NM_183200 | 5330438D1327824 |        | RIKEN cDNA 5330438D12 gene                                                                                  | -1.46 | 0.65 | 0.21 |
| A_51_P286373 | NM_183017 | Ttll12          | 223723 | tubulin tyrosine ligase-like family, member 12                                                              | -1.34 | 0.65 | 0.37 |
| A_51_P381247 | NM_028303 | Pdzd11          | 72621  | PDZ domain containing 11                                                                                    | -1.47 | 0.64 | 0.21 |
| A_52_P430710 | NM_028162 | Tbc1d5          | 72238  | TBC1 domain family, member 5                                                                                | -1.37 | 0.64 | 0.33 |
| A_52_P4598   | NM_013872 | Pmm1            | 29858  | phosphomannomutase 1                                                                                        | -1.58 | 0.64 | 0.15 |



|               |           |          |        |                                                                                     |       |      |      |
|---------------|-----------|----------|--------|-------------------------------------------------------------------------------------|-------|------|------|
| A_52_P387954  | NM_021608 | Dctn5    | 59288  | dynactin 5                                                                          | -1.12 | 0.64 | 0.86 |
| A_51_P101137  | NM_146025 | Samd14   | 217125 | sterile alpha motif domain containing 14                                            | -1.32 | 0.64 | 0.40 |
| A_51_P210885  | NM_172463 | Sned1    | 208777 | sushi, nidogen and EGF-like domains 1                                               | -1.68 | 0.64 | 0.10 |
| A_52_P244572  | NM_008633 | Mtap4    | 17758  | microtubule-associated protein 4                                                    | -1.40 | 0.64 | 0.28 |
| A_52_P533750  | NM_144523 | Zfp622   | 52521  | zinc finger protein 622                                                             | -1.41 | 0.64 | 0.27 |
| A_51_P466502  | NM_177093 | Lrrc58   | 320184 | leucine rich repeat containing 58                                                   | -1.17 | 0.64 | 0.70 |
| A_52_P96898   | AK002636  | Srr      | 27364  | serine racemase                                                                     | -1.69 | 0.64 | 0.09 |
| A_51_P183995  | NM_019458 | Paf1     | 54624  | Paf1, RNA polymerase II associated factor, homolog (S. cerevisiae)                  | -1.29 | 0.64 | 0.46 |
| A_51_P117162  | NM_007624 | Cbx3     | 12417  | chromobox homolog 3 (Drosophila HP1 gamma)                                          | -1.42 | 0.64 | 0.27 |
| A_52_P1156127 | AK051961  | Gm8037   | 666304 | predicted gene 8037                                                                 | -1.58 | 0.64 | 0.15 |
| A_51_P101255  | NM_027896 | Coasy    | 71743  | Coenzyme A synthase                                                                 | -1.69 | 0.64 | 0.09 |
| A_51_P318544  | NM_001039 | Fdx1l    | 68165  | ferredoxin 1-like                                                                   | -1.40 | 0.64 | 0.28 |
| A_51_P309920  | NM_001001 | Itga8    | 241226 | integrin alpha 8                                                                    | -1.31 | 0.64 | 0.44 |
| A_51_P150105  | NM_012022 | NA       | NA     | NA                                                                                  | -1.43 | 0.64 | 0.24 |
| A_51_P491329  | NM_026018 | Pdzk1ip1 | 67182  | PDZK1 interacting protein 1                                                         | -1.34 | 0.64 | 0.37 |
| A_52_P639229  | NM_139232 | Fgd4     | 224014 | FYVE, RhoGEF and PH domain containing 4                                             | -1.43 | 0.64 | 0.24 |
| A_52_P136709  | NM_008796 | Pctp     | 18559  | phosphatidylcholine transfer protein                                                | -1.33 | 0.64 | 0.40 |
| A_51_P282144  | NM_011780 | Adam23   | 23792  | a disintegrin and metallopeptidase domain 23                                        | -1.14 | 0.64 | 0.82 |
| A_51_P221495  | NM_145414 | Nsun5    | 100609 | NOL1/NOP2/Sun domain family, member 5                                               | -1.50 | 0.64 | 0.20 |
| A_52_P268726  | AK029771  | Sfmbt1   | 54650  | Scm-like with four mbt domains 1                                                    | -1.61 | 0.64 | 0.13 |
| A_51_P438083  | NM_144512 | Slc6a13  | 14412  | solute carrier family 6 (neurotransmitter transporter, GABA), member 13             | -1.55 | 0.64 | 0.16 |
| A_52_P462171  | XM_354675 | NA       | NA     | NA                                                                                  | -1.29 | 0.64 | 0.46 |
| A_52_P159990  | NM_145990 | Cdk5rap2 | 214444 | CDK5 regulatory subunit associated protein 2                                        | -1.52 | 0.64 | 0.18 |
| A_51_P311990  | NM_011032 | P4hb     | 18453  | prolyl 4-hydroxylase, beta polypeptide                                              | -1.31 | 0.64 | 0.44 |
| A_52_P537175  | AK029235  | Krba1    | 77827  | KRAB-A domain containing 1                                                          | -1.57 | 0.64 | 0.15 |
| A_52_P79038   | NM_001008 | Scaf1    | 233208 | SR-related CTD-associated factor 1                                                  | -1.38 | 0.64 | 0.30 |
| A_51_P343569  | BC016585  | Galnt10  | 171212 | UDP-N-acetyl-alpha-D-galactosamine:polypeptide N-acetylgalactosaminyltransferase 10 | -1.61 | 0.64 | 0.13 |
| A_52_P674467  | NM_001039 | Lin7a    | 108030 | lin-7 homolog A (C. elegans)                                                        | -1.36 | 0.64 | 0.34 |
| A_51_P317695  | NM_019510 | Trpc3    | 22065  | transient receptor potential cation channel, subfamily C, member 3                  | -1.42 | 0.64 | 0.27 |

|              |           |           |        |                                                                 |       |      |      |
|--------------|-----------|-----------|--------|-----------------------------------------------------------------|-------|------|------|
| A_51_P249930 | NM_146236 | Tceal1    | 237052 | transcription elongation factor A (SII)-like 1                  | -1.38 | 0.64 | 0.30 |
| A_51_P374863 | NM_013742 | Cars      | 27267  | cysteinyl-tRNA synthetase                                       | -1.30 | 0.64 | 0.46 |
| A_51_P306160 | AK051378  | Map3k13   | 71751  | mitogen-activated protein kinase kinase kinase 13               | -1.29 | 0.64 | 0.46 |
| A_52_P892091 | AK079466  | A030007N1 | 109237 | RIKEN cDNA A030007N12 gene                                      | -1.25 | 0.64 | 0.55 |
| A_51_P384629 | NM_009983 | Ctsd      | 13033  | cathepsin D                                                     | -1.56 | 0.64 | 0.16 |
| A_51_P140871 | NA        | NA        | NA     | NA                                                              | -1.21 | 0.64 | 0.61 |
| A_51_P355416 | AF315344  | Nisch     | 64652  | nischarin                                                       | -1.22 | 0.64 | 0.58 |
| A_51_P194883 | NM_008434 | Kcnq1     | 16535  | potassium voltage-gated channel, subfamily Q, member 1          | -1.33 | 0.64 | 0.40 |
| A_52_P96939  | AK019858  | Pqlc1     | 66943  | PQ loop repeat containing 1                                     | -1.51 | 0.64 | 0.18 |
| A_52_P281033 | NM_019654 | Socs5     | 56468  | suppressor of cytokine signaling 5                              | -1.44 | 0.64 | 0.22 |
| A_51_P327828 | NM_011149 | Ppib      | 19035  | peptidylprolyl isomerase B                                      | -1.50 | 0.64 | 0.20 |
| A_51_P459091 | NM_172550 | A130042E2 | 216119 | RIKEN cDNA A130042E20 gene                                      | -1.61 | 0.64 | 0.13 |
| A_51_P189631 | AK052500  | 2310067E1 | 76455  | RIKEN cDNA 2310067E19 gene                                      | -1.35 | 0.64 | 0.34 |
| A_51_P417720 | NM_176922 | Itga11    | 319480 | integrin alpha 11                                               | -1.28 | 0.64 | 0.46 |
| A_52_P128951 | NM_025671 | Ogfod2    | 66627  | 2-oxoglutarate and iron-dependent oxygenase domain containing 2 | -1.37 | 0.64 | 0.33 |
| A_52_P74637  | NM_001018 | Gm4983    | 245297 | predicted gene 4983                                             | -1.40 | 0.64 | 0.28 |
| A_51_P121359 | NM_001029 | Zc3h18    | 76014  | zinc finger CCCH-type containing 18                             | -1.64 | 0.64 | 0.11 |
| A_52_P382565 | XM_976961 | NA        | NA     | NA                                                              | -1.27 | 0.64 | 0.50 |
| A_51_P324768 | AK005093  | Etohi1    | 626848 | ethanol induced 1                                               | -1.21 | 0.64 | 0.61 |
| A_52_P876207 | AK085773  | Arhgef15  | 442801 | Rho guanine nucleotide exchange factor (GEF) 15                 | -1.50 | 0.64 | 0.20 |
| A_51_P267194 | NM_011810 | Faim      | 23873  | Fas apoptotic inhibitory molecule                               | -1.64 | 0.64 | 0.11 |
| A_51_P150678 | NM_027206 | Tnfaip8l2 | 69769  | tumor necrosis factor, alpha-induced protein 8-like 2           | -1.44 | 0.64 | 0.22 |
| A_51_P462444 | NM_026795 | Tm2d3     | 68634  | TM2 domain containing 3                                         | -1.49 | 0.64 | 0.20 |
| A_52_P443330 | NM_027432 | Wdr77     | 70465  | WD repeat domain 77                                             | -1.63 | 0.64 | 0.11 |
| A_51_P304510 | NM_145590 | BC017158  | 233913 | cDNA sequence BC017158                                          | -1.14 | 0.64 | 0.82 |
| A_51_P137007 | NM_012039 | Zw10      | 26951  | ZW10 homolog (Drosophila), centromere/kinetochore protein       | -1.33 | 0.64 | 0.40 |
| A_51_P490823 | NM_145494 | Me2       | 107029 | malic enzyme 2, NAD(+)-dependent, mitochondrial                 | -1.45 | 0.64 | 0.22 |

|               |           |           |        |                                                         |       |      |      |
|---------------|-----------|-----------|--------|---------------------------------------------------------|-------|------|------|
| A_51_P214580  | AK041989  | Wipi2     | 74781  | WD repeat domain, phosphoinositide interacting 2        | -1.21 | 0.64 | 0.61 |
| A_51_P175454  | NM_011870 | Cib1      | 23991  | calcium and integrin binding 1 (calmyrin)               | -1.26 | 0.64 | 0.53 |
| A_52_P296670  | NM_008997 | Rab11b    | 19326  | RAB11B, member RAS oncogene family                      | -1.18 | 0.64 | 0.70 |
| A_52_P194805  | NM_026521 | Zfp706    | 68036  | zinc finger protein 706                                 | -1.50 | 0.64 | 0.20 |
|               |           |           |        | NIMA (never in mitosis gene a)-related expressed kinase |       |      |      |
| A_51_P289263  | NM_145138 | Nek9      | 217718 | 9                                                       | -1.45 | 0.64 | 0.22 |
| A_52_P1083427 | AK020414  | 9430013L1 | 77266  | RIKEN cDNA 9430013L17 gene                              | -1.43 | 0.64 | 0.24 |
| A_51_P487547  | NM_025911 | Ccdc91    | 67015  | coiled-coil domain containing 91                        | -1.60 | 0.64 | 0.14 |
| A_52_P374681  | NM_177394 | A730011L0 | 338371 | RIKEN cDNA A730011L01 gene                              | -1.67 | 0.64 | 0.10 |
| A_52_P136153  | NM_007749 | Cox7c     | 12867  | cytochrome c oxidase, subunit VIIc                      | -1.22 | 0.64 | 0.58 |
| A_51_P431121  | AK052831  | NA        | NA     | NA                                                      | -1.57 | 0.64 | 0.15 |
|               |           |           |        |                                                         |       |      |      |
| A_52_P2224    | AF213385  | Abcd1     | 11666  | ATP-binding cassette, sub-family D (ALD), member 1      | -1.09 | 0.64 | 0.97 |
|               |           |           |        |                                                         |       |      |      |
| A_51_P516705  | NM_023913 | Ern1      | 78943  | endoplasmic reticulum (ER) to nucleus signalling 1      | -1.37 | 0.64 | 0.33 |
| A_52_P763938  | NA        | NA        | NA     | NA                                                      | -1.22 | 0.64 | 0.58 |
| A_52_P468851  | NM_183115 | Ccdc125   | 76041  | coiled-coil domain containing 125                       | -1.60 | 0.64 | 0.14 |
| A_51_P104128  | AK003452  | Oaz1      | 18245  | ornithine decarboxylase antizyme 1                      | -1.33 | 0.64 | 0.37 |
| A_51_P180617  | NM_153783 | Paox      | 212503 | polyamine oxidase (exo-N4-amino)                        | -1.18 | 0.64 | 0.70 |
| A_51_P276039  | NM_175150 | Txndc15   | 69672  | thioredoxin domain containing 15                        | -1.77 | 0.64 | 0.06 |
| A_52_P20867   | NM_023755 | Tcfcp2l1  | 81879  | transcription factor CP2-like 1                         | -1.35 | 0.64 | 0.34 |
| A_52_P420712  | NM_001025 | Pja2      | 224938 | praja 2, RING-H2 motif containing                       | -1.39 | 0.64 | 0.30 |
| A_51_P415748  | AK085610  | NA        | NA     | NA                                                      | -1.75 | 0.64 | 0.07 |
| A_52_P266643  | NM_177003 | 9630033F2 | 319801 | RIKEN cDNA 9630033F20 gene                              | -1.52 | 0.64 | 0.18 |
| A_51_P244892  | NM_021501 | Pias4     | 59004  | protein inhibitor of activated STAT 4                   | -1.26 | 0.64 | 0.53 |
| A_52_P619991  | AK014834  | Them4     | 75778  | thioesterase superfamily member 4                       | -1.41 | 0.64 | 0.28 |
| A_51_P459538  | NM_015735 | Ddb1      | 13194  | damage specific DNA binding protein 1                   | -1.42 | 0.64 | 0.27 |
| A_52_P413646  | NM_007556 | Bmp6      | 12161  | bone morphogenetic protein 6                            | -1.56 | 0.64 | 0.15 |
| A_52_P573543  | NM_201607 | Pde4c     | 110385 | phosphodiesterase 4C, cAMP specific                     | -1.19 | 0.64 | 0.67 |
| A_52_P187820  | AK017029  | Arhgap26  | 71302  | Rho GTPase activating protein 26                        | -1.37 | 0.64 | 0.33 |
| A_52_P266312  | AK081968  | 8030498J2 | 320389 | RIKEN cDNA 8030498J20 gene                              | -1.31 | 0.64 | 0.44 |
| A_51_P110651  | NM_011747 | Zfp13     | 22654  | zinc finger protein 13                                  | -1.58 | 0.64 | 0.15 |
| A_51_P356144  | NM_009224 | Snrnp70   | 20637  | small nuclear ribonucleoprotein 70 (U1)                 | -1.37 | 0.64 | 0.33 |

|               |           |          |        |                                                                           |       |      |      |
|---------------|-----------|----------|--------|---------------------------------------------------------------------------|-------|------|------|
| A_51_P357622  | NM_147120 | OlfR638  | 259124 | olfactory receptor 638                                                    | -1.07 | 0.64 | 1.04 |
| A_51_P422030  | NM_029865 | Ocel1    | 77090  | occludin/ELL domain containing 1                                          | -1.13 | 0.64 | 0.86 |
| A_51_P237746  | AK004226  | NA       | NA     | NA                                                                        | -1.51 | 0.64 | 0.18 |
| A_52_P179047  | NM_019750 | Nat6     | 56441  | N-acetyltransferase 6                                                     | -1.38 | 0.64 | 0.33 |
| A_52_P600822  | NM_008860 | Prkcz    | 18762  | protein kinase C, zeta                                                    | -1.40 | 0.64 | 0.28 |
| A_51_P484020  | NM_134158 | AF251705 | 140497 | cDNA sequence AF251705                                                    | -1.43 | 0.64 | 0.24 |
| A_52_P473966  | NM_134090 | Kdelr3   | 105785 | KDEL (Lys-Asp-Glu-Leu) endoplasmic reticulum protein retention receptor 3 | -1.38 | 0.64 | 0.30 |
| A_52_P229210  | XR_003524 | NA       | NA     | NA                                                                        | -1.15 | 0.64 | 0.82 |
| A_51_P413710  | NM_007460 | Ap3d1    | 11776  | adaptor-related protein complex 3, delta 1 subunit                        | -1.62 | 0.64 | 0.12 |
| A_52_P227279  | NM_011703 | Vipr1    | 22354  | vasoactive intestinal peptide receptor 1                                  | -1.33 | 0.64 | 0.37 |
| A_51_P448671  | NM_011539 | Tbxas1   | 21391  | thromboxane A synthase 1, platelet                                        | -1.39 | 0.64 | 0.28 |
| A_51_P162760  | NM_030199 | Zfp623   | 78834  | zinc finger protein 623                                                   | -1.17 | 0.64 | 0.70 |
| A_52_P406141  | AK083096  | Wwox     | 80707  | WW domain-containing oxidoreductase                                       | -1.48 | 0.64 | 0.20 |
| A_52_P522990  | BC039287  | Trub1    | 72133  | TruB pseudouridine (psi) synthase homolog 1 (E. coli)                     | -1.54 | 0.64 | 0.16 |
| A_52_P316933  | NM_172507 | Sh3bgrl2 | 212531 | SH3 domain binding glutamic acid-rich protein like 2                      | -1.36 | 0.64 | 0.34 |
| A_52_P445584  | NM_023243 | Ccnh     | 66671  | cyclin H                                                                  | -1.40 | 0.64 | 0.28 |
| A_52_P1055590 | NM_172149 | Bnip1    | 224630 | BCL2/adenovirus E1B interacting protein 1                                 | -1.43 | 0.64 | 0.24 |
| A_51_P176513  | NM_170592 | Mettl11a | 66617  | methyltransferase like 11A                                                | -1.17 | 0.64 | 0.70 |
| A_51_P479818  | NM_028894 | Lonrf3   | 74365  | LON peptidase N-terminal domain and ring finger 3                         | -1.15 | 0.64 | 0.82 |
| A_51_P103718  | NM_013785 | Ip6k1    | 27399  | inositol hexaphosphate kinase 1                                           | -1.59 | 0.64 | 0.14 |
| A_51_P502348  | NM_018783 | Tfip11   | 54723  | tuftelin interacting protein 11                                           | -1.60 | 0.64 | 0.14 |
| A_51_P509389  | NM_031868 | Ppp1ca   | 19045  | protein phosphatase 1, catalytic subunit, alpha isoform                   | -1.59 | 0.64 | 0.14 |
| A_51_P465445  | NM_008633 | Mtap4    | 17758  | microtubule-associated protein 4                                          | -1.47 | 0.64 | 0.21 |
| A_52_P350554  | NM_008420 | Kcnb1    | 16500  | potassium voltage gated channel, Shab-related subfamily, member 1         | -1.37 | 0.64 | 0.33 |
| A_51_P479177  | NM_025533 | Nosip    | 66394  | nitric oxide synthase interacting protein                                 | -1.50 | 0.64 | 0.20 |
| A_52_P152952  | NM_027203 | Leng1    | 69757  | leukocyte receptor cluster (LRC) member 1                                 | -1.34 | 0.64 | 0.37 |
| A_51_P249544  | NM_029621 | Haus8    | 76478  | 4HAUS augmin-like complex, subunit 8                                      | -1.12 | 0.64 | 0.86 |

|              |           |           |        |                                                          |       |      |      |
|--------------|-----------|-----------|--------|----------------------------------------------------------|-------|------|------|
|              |           |           |        | ubiquinol-cytochrome c reductase complex chaperone,      |       |      |      |
| A_51_P341285 | NM_018888 | Uqcc      | 56046  | CBP3 homolog (yeast)                                     | -1.66 | 0.64 | 0.10 |
| A_52_P407692 | NM_177688 | H2afj     | 232440 | H2A histone family, member J                             | -1.70 | 0.64 | 0.09 |
| A_51_P504672 | NM_133665 | Mef2d     | 17261  | myocyte enhancer factor 2D                               | -1.54 | 0.64 | 0.16 |
| A_51_P481221 | NM_019517 | Bace2     | 56175  | beta-site APP-cleaving enzyme 2                          | -1.73 | 0.64 | 0.07 |
| A_52_P272364 | AK161163  | Gria3     | 53623  | glutamate receptor, ionotropic, AMPA3 (alpha 3)          | -1.15 | 0.64 | 0.82 |
| A_51_P109144 | NM_025768 | Grtp1     | 66790  | GH regulated TBC protein 1                               | -1.51 | 0.64 | 0.18 |
| A_51_P507471 | AK010990  | 2510022D2 | 66567  | RIKEN cDNA 2510022D24 gene                               | -1.50 | 0.64 | 0.20 |
| A_52_P626069 | NM_177224 | Chd9      | 109151 | chromodomain helicase DNA binding protein 9              | -1.09 | 0.64 | 0.97 |
| A_51_P158628 | NM_011952 | Mapk3     | 26417  | mitogen-activated protein kinase 3                       | -1.59 | 0.64 | 0.14 |
| A_51_P294550 | NM_019829 | Stx5a     | 56389  | syntaxin 5A                                              | -1.28 | 0.64 | 0.50 |
| A_51_P182443 | NM_198303 | Eif5b     | 226982 | eukaryotic translation initiation factor 5B              | -1.16 | 0.64 | 0.77 |
| A_51_P327530 | NM_026635 | Fam96a    | 68250  | family with sequence similarity 96, member A             | -1.46 | 0.64 | 0.21 |
| A_52_P457376 | NA        | NA        | NA     | NA                                                       | -1.33 | 0.64 | 0.37 |
| A_52_P963729 | AK053988  | NA        | NA     | NA                                                       | -1.38 | 0.64 | 0.30 |
| A_52_P128032 | NM_146051 | 3830406C1 | 218734 | RIKEN cDNA 3830406C13 gene                               | -1.45 | 0.64 | 0.22 |
| A_52_P317393 | NM_018882 | Gpr56     | 14766  | G protein-coupled receptor 56                            | -1.19 | 0.64 | 0.67 |
| A_52_P65193  | NM_172557 | Rufy1     | 216724 | RUN and FYVE domain containing 1                         | -1.67 | 0.64 | 0.10 |
| A_52_P448205 | BC053843  | Clstn1    | 65945  | calsyntenin 1                                            | -1.35 | 0.64 | 0.34 |
| A_51_P179987 | NM_027985 | Mad2l2    | 71890  | MAD2 mitotic arrest deficient-like 2 (yeast)             | -1.25 | 0.64 | 0.55 |
| A_52_P350664 | NM_153781 | Pygb      | 110078 | brain glycogen phosphorylase                             | -1.43 | 0.64 | 0.24 |
| A_52_P672825 | BC106120  | Rad9b     | 231724 | RAD9 homolog B ( <i>S. cerevisiae</i> )                  | -1.67 | 0.64 | 0.10 |
| A_51_P413740 | NM_080845 | Ftcd      | 14317  | formiminotransferase cyclodeaminase                      | -1.73 | 0.64 | 0.07 |
| A_51_P324393 | NM_016805 | Hnrnpu    | 51810  | heterogeneous nuclear ribonucleoprotein U                | -1.41 | 0.64 | 0.28 |
| A_51_P513586 | NM_025617 | 2210012G0 | 66526  | RIKEN cDNA 2210012G02 gene                               | -1.19 | 0.64 | 0.67 |
| A_52_P287839 | NM_144820 | Ccdc28a   | 215814 | coiled-coil domain containing 28A                        | -1.35 | 0.64 | 0.34 |
| A_51_P513979 | NM_027283 | 1700026L0 | 69987  | RIKEN cDNA 1700026L06 gene                               | -1.62 | 0.64 | 0.12 |
| A_51_P252596 | AK084625  | D330022K0 | 319940 | RIKEN cDNA D330022K07 gene                               | -1.59 | 0.64 | 0.14 |
| A_52_P462081 | NM_020035 | Pigo      | 56703  | phosphatidylinositol glycan anchor biosynthesis, class O | -1.58 | 0.64 | 0.15 |
| A_51_P334444 | XM_131166 | NA        | NA     | NA                                                       | -1.11 | 0.64 | 0.91 |
| A_52_P681659 | XM_485258 | NA        | NA     | NA                                                       | -1.66 | 0.64 | 0.11 |
| A_52_P608444 | NM_133957 | Nfat5     | 54446  | nuclear factor of activated T-cells 5                    | -1.59 | 0.64 | 0.14 |
| A_51_P265475 | NM_022023 | Gmfb      | 63985  | glia maturation factor, beta                             | -1.37 | 0.64 | 0.33 |

|              |           |           |        |                                                                       |       |      |      |
|--------------|-----------|-----------|--------|-----------------------------------------------------------------------|-------|------|------|
| A_52_P267779 | NM_022887 | Tsc1      | 64930  | tuberous sclerosis 1                                                  | -1.85 | 0.64 | 0.04 |
| A_51_P454002 | NM_027129 | 2310035K2 | 69596  | RIKEN cDNA 2310035K24 gene                                            | -1.54 | 0.64 | 0.16 |
| A_52_P549418 | NM_011505 | Stxbp4    | 20913  | syntaxin binding protein 4                                            | -1.78 | 0.64 | 0.06 |
| A_51_P234025 | NM_148930 | Rbm5      | 83486  | RNA binding motif protein 5                                           | -1.28 | 0.64 | 0.50 |
| A_51_P158073 | NM_175687 | A230050P2 | 319278 | RIKEN cDNA A230050P20 gene                                            | -1.62 | 0.64 | 0.13 |
| A_52_P370878 | NM_175489 | Osbpl8    | 237542 | oxysterol binding protein-like 8                                      | -1.53 | 0.64 | 0.17 |
| A_51_P366161 | NM_010822 | Mpg       | 268395 | N-methylpurine-DNA glycosylase                                        | -1.13 | 0.64 | 0.82 |
| A_52_P442414 | NM_172928 | Dclk3     | 245038 | doublecortin-like kinase 3                                            | -1.23 | 0.64 | 0.55 |
| A_51_P231920 | NM_001013 | Lman2l    | 214895 | lectin, mannose-binding 2-like                                        | -1.68 | 0.64 | 0.10 |
| A_52_P247513 | NM_207659 | Hook3     | 320191 | hook homolog 3 (Drosophila)                                           | -1.11 | 0.64 | 0.91 |
| A_52_P323669 | NM_011155 | Ppp5c     | 19060  | protein phosphatase 5, catalytic subunit                              | -1.72 | 0.64 | 0.07 |
| A_51_P420955 | NM_021312 | Wdr12     | 57750  | WD repeat domain 12                                                   | -1.41 | 0.64 | 0.28 |
| A_51_P165098 | NM_028758 | Gga2      | 74105  | golgi associated, gamma adaptin ear containing, ARF binding protein 2 | -1.21 | 0.64 | 0.61 |
| A_52_P106294 | NM_172587 | Cdc14b    | 218294 | CDC14 cell division cycle 14 homolog B (S. cerevisiae)                | -1.22 | 0.64 | 0.58 |
| A_52_P451796 | NM_021890 | Fads3     | 60527  | fatty acid desaturase 3                                               | -1.64 | 0.64 | 0.11 |
| A_51_P463348 | NM_007893 | E4f1      | 13560  | E4F transcription factor 1                                            | -1.45 | 0.64 | 0.22 |
| A_52_P541760 | NA        | NA        | NA     | NA                                                                    | -1.38 | 0.64 | 0.33 |
| A_51_P411355 | NM_021441 | Taf1c     | 21341  | TATA box binding protein (Tbp)-associated factor, RNA polymerase I, C | -1.52 | 0.64 | 0.18 |
| A_51_P182693 | NM_008727 | Npr1      | 18160  | natriuretic peptide receptor 1                                        | -1.47 | 0.64 | 0.21 |
| A_51_P320782 | NM_019726 | Gps2      | 56310  | G protein pathway suppressor 2                                        | -1.52 | 0.64 | 0.17 |
| A_51_P297311 | NM_134002 | Csnk1g2   | 103236 | casein kinase 1, gamma 2                                              | -1.73 | 0.64 | 0.07 |
| A_51_P416408 | NM_181820 | Tmc4      | 353499 | transmembrane channel-like gene family 4                              | -1.26 | 0.64 | 0.53 |
| A_51_P220055 | NM_172404 | Ccbl1     | 70266  | cysteine conjugate-beta lyase 1                                       | -1.26 | 0.64 | 0.53 |
| A_51_P124485 | AK087204  | NA        | NA     | NA                                                                    | -1.27 | 0.64 | 0.50 |
| A_52_P399646 | NM_025343 | Rmnd1     | 66084  | required for meiotic nuclear division 1 homolog (S. cerevisiae)       | -1.47 | 0.63 | 0.21 |
| A_51_P266668 | NM_175403 | Mlec      | 109154 | malectin                                                              | -1.28 | 0.63 | 0.50 |
| A_51_P244439 | NM_173363 | Eif5      | 217869 | eukaryotic translation initiation factor 5                            | -1.17 | 0.63 | 0.70 |
| A_51_P430327 | NM_177992 | Gmpr2     | 105446 | guanosine monophosphate reductase 2                                   | -1.35 | 0.63 | 0.34 |
| A_51_P315720 | NM_028312 | Ccdc12    | 72654  | coiled-coil domain containing 12                                      | -1.41 | 0.63 | 0.27 |
| A_52_P55053  | NM_028358 | Ssbp1     | 381760 | single-stranded DNA binding protein 1                                 | -1.23 | 0.63 | 0.55 |

|              |           |         |        |                                                                           |       |      |      |
|--------------|-----------|---------|--------|---------------------------------------------------------------------------|-------|------|------|
| A_51_P137111 | NM_016681 | Chek2   | 50883  | CHK2 checkpoint homolog ( <i>S. pombe</i> )                               | -1.50 | 0.63 | 0.20 |
| A_51_P365952 | NM_010067 | Trdmt1  | 13434  | tRNA aspartic acid methyltransferase 1                                    | -1.37 | 0.63 | 0.33 |
| A_51_P448946 | NM_021372 | Sertad2 | 58172  | SERTA domain containing 2                                                 | -1.46 | 0.63 | 0.21 |
| A_52_P51411  | NM_001033 | NA      | NA     | NA                                                                        | -1.46 | 0.63 | 0.21 |
| A_51_P118417 | NM_029023 | Scpep1  | 74617  | serine carboxypeptidase 1                                                 | -1.67 | 0.63 | 0.10 |
| A_51_P164207 | NM_011842 | Mta2    | 23942  | metastasis-associated gene family, member 2                               | -1.08 | 0.63 | 1.04 |
| A_51_P202014 | NM_025579 | Taf12   | 66464  | TAF12 RNA polymerase II, TATA box binding protein (TBP)-associated factor | -1.67 | 0.63 | 0.10 |
| A_52_P409760 | NM_010492 | Ica1    | 15893  | islet cell autoantigen 1                                                  | -1.37 | 0.63 | 0.33 |
| A_52_P172283 | NM_130892 | Rtn4ip1 | 170728 | reticulon 4 interacting protein 1                                         | -1.31 | 0.63 | 0.44 |
| A_51_P247175 | AK147743  | Ints10  | 70885  | integrator complex subunit 10                                             | -1.31 | 0.63 | 0.40 |
| A_52_P300500 | AK017831  | Gphn    | 268566 | gephyrin                                                                  | -1.50 | 0.63 | 0.20 |
| A_51_P355472 | NM_025385 | Prr13   | 66151  | proline rich 13                                                           | -1.74 | 0.63 | 0.07 |
| A_51_P270666 | NM_001013 | Usp1    | 231915 | ubiquitin specific peptidase like 1                                       | -1.40 | 0.63 | 0.28 |
| A_52_P51468  | DT905805  | Actr8   | 56249  | ARP8 actin-related protein 8 homolog ( <i>S. cerevisiae</i> )             | -1.64 | 0.63 | 0.11 |
| A_52_P181060 | NM_022988 | Nif3l1  | 65102  | Ngg1 interacting factor 3-like 1 ( <i>S. pombe</i> )                      | -1.69 | 0.63 | 0.09 |
| A_52_P633163 | NM_008650 | Mut     | 17850  | methylmalonyl-Coenzyme A mutase                                           | -1.26 | 0.63 | 0.50 |
| A_51_P264835 | NM_010148 | Epn2    | 13855  | epsin 2                                                                   | -1.43 | 0.63 | 0.24 |
| A_51_P232551 | NA        | NA      | NA     | NA                                                                        | -1.42 | 0.63 | 0.27 |
| A_51_P226962 | NM_015830 | Solh    | 50817  | small optic lobes homolog ( <i>Drosophila</i> )                           | -1.49 | 0.63 | 0.20 |
| A_51_P297647 | NM_139302 | Sh3glb2 | 227700 | SH3-domain GRB2-like endophilin B2                                        | -1.61 | 0.63 | 0.13 |
| A_51_P140311 | NM_010312 | Gnb2    | 14693  | guanine nucleotide binding protein (G protein), beta 2                    | -1.59 | 0.63 | 0.14 |
| A_51_P390496 | NM_139308 | Stard7  | 99138  | START domain containing 7                                                 | -1.11 | 0.63 | 0.91 |
| A_52_P166833 | AK088223  | Snx5    | 69178  | sorting nexin 5                                                           | -1.52 | 0.63 | 0.18 |
| A_52_P187940 | NA        | NA      | NA     | NA                                                                        | -1.64 | 0.63 | 0.11 |
| A_52_P490910 | NM_022424 | Fndc4   | 64339  | fibronectin type III domain containing 4                                  | -1.76 | 0.63 | 0.07 |
| A_52_P172199 | NM_177226 | Zfp629  | 320683 | zinc finger protein 629                                                   | -1.45 | 0.63 | 0.22 |
| A_52_P143287 | NM_001005 | Itgb4   | 192897 | integrin beta 4                                                           | -1.17 | 0.63 | 0.77 |
| A_52_P217978 | AK173301  | Wdr59   | 319481 | WD repeat domain 59                                                       | -1.66 | 0.63 | 0.11 |
| A_52_P460119 | NA        | NA      | NA     | NA                                                                        | -1.55 | 0.63 | 0.16 |
| A_52_P656565 | NM_145488 | Pex6    | 224824 | peroxisomal biogenesis factor 6                                           | -1.52 | 0.63 | 0.17 |
| A_52_P93256  | NM_011923 | Angptl2 | 26360  | angiopoietin-like 2                                                       | -1.56 | 0.63 | 0.15 |

|              |                     |        |                                                                                             |       |      |      |
|--------------|---------------------|--------|---------------------------------------------------------------------------------------------|-------|------|------|
| A_51_P484054 | NM_010172 F7        | 14068  | coagulation factor VII                                                                      | -1.69 | 0.63 | 0.09 |
| A_52_P105040 | NM_007450 Slc25a4   | 11739  | solute carrier family 25 (mitochondrial carrier, adenine nucleotide translocator), member 4 | -1.53 | 0.63 | 0.17 |
| A_51_P100573 | NM_011947 Map3k3    | 26406  | mitogen-activated protein kinase kinase kinase 3                                            | -1.71 | 0.63 | 0.07 |
| A_51_P516057 | NM_021466 Taf1a     | 21339  | TATA box binding protein (Tbp)-associated factor, RNA polymerase I, A                       | -1.36 | 0.63 | 0.34 |
| A_51_P216085 | NM_027026 Lrrc46    | 69297  | leucine rich repeat containing 46                                                           | -1.13 | 0.63 | 0.82 |
| A_51_P135242 | NM_001045 Mink1     | 50932  | misshapen-like kinase 1 (zebrafish)                                                         | -1.21 | 0.63 | 0.61 |
| A_51_P353173 | NM_133747 Fam98a    | 72722  | family with sequence similarity 98, member A                                                | -1.55 | 0.63 | 0.16 |
| A_52_P598468 | AK013710 Gtpbp5     | 52856  | GTP binding protein 5                                                                       | -1.64 | 0.63 | 0.11 |
| A_52_P566741 | NM_009333 Tcf7l2    | 21416  | transcription factor 7-like 2, T-cell specific, HMG-box                                     | -1.50 | 0.63 | 0.20 |
| A_52_P330980 | AK143126 Dennd5b    | 320560 | DENN/MADD domain containing 5B                                                              | -1.45 | 0.63 | 0.22 |
| A_52_P382876 | NM_177692 Bloc1s3   | 232946 | biogenesis of lysosome-related organelles complex-1, subunit 3                              | -1.54 | 0.63 | 0.16 |
| A_51_P237945 | NM_172394 Nup88     | 19069  | nucleoporin 88                                                                              | -1.40 | 0.63 | 0.28 |
| A_51_P189343 | NM_144941 Mtap7d1   | 245877 | microtubule-associated protein 7 domain containing 1                                        | -1.44 | 0.63 | 0.22 |
| A_52_P184398 | NM_019761 Nxt1      | 56488  | NTF2-related export protein 1                                                               | -1.30 | 0.63 | 0.44 |
| A_52_P559467 | NA NA               | NA     | NA                                                                                          | -1.08 | 0.63 | 1.04 |
| A_51_P303160 | NM_007482 Arg1      | 11846  | arginase, liver                                                                             | -1.08 | 0.63 | 1.04 |
| A_51_P187082 | NM_008062 G6pdx     | 14381  | glucose-6-phosphate dehydrogenase X-linked                                                  | -1.40 | 0.63 | 0.28 |
| A_51_P219109 | NM_008353 Il12rb1   | 16161  | interleukin 12 receptor, beta 1                                                             | -1.43 | 0.63 | 0.24 |
| A_51_P296057 | NM_030680 Upf1      | 19704  | UPF1 regulator of nonsense transcripts homolog (yeast)                                      | -1.55 | 0.63 | 0.16 |
| A_52_P545831 | NM_201357 Tssc1     | 380752 | tumor suppressing subtransferable candidate 1                                               | -1.56 | 0.63 | 0.15 |
| A_52_P188678 | BC009088 Pvr12      | 19294  | poliovirus receptor-related 2                                                               | -1.19 | 0.63 | 0.67 |
| A_52_P654043 | NM_144898 Msto1     | 229524 | misato homolog 1 (Drosophila)                                                               | -1.56 | 0.63 | 0.15 |
| A_51_P214083 | NM_025966 2310039HC | 67101  | RIKEN cDNA 2310039H08 gene                                                                  | -1.61 | 0.63 | 0.13 |
| A_52_P214455 | NM_146176 Cnot3     | 232791 | CCR4-NOT transcription complex, subunit 3                                                   | -1.38 | 0.63 | 0.30 |
| A_51_P438461 | NM_001008 Wdr34     | 71820  | WD repeat domain 34                                                                         | -1.61 | 0.63 | 0.13 |
| A_51_P490204 | NM_026398 Pop5      | 117109 | processing of precursor 5, ribonuclease P/MRP family (S. cerevisiae)                        | -1.55 | 0.63 | 0.16 |
| A_51_P490171 | NM_011956 Nubp2     | 26426  | nucleotide binding protein 2                                                                | -1.84 | 0.63 | 0.04 |



|              |           |                |        |                                                       |       |      |      |
|--------------|-----------|----------------|--------|-------------------------------------------------------|-------|------|------|
| A_52_P134083 | NM_180962 | Cyhr1          | 54151  | cysteine and histidine rich 1                         | -1.45 | 0.63 | 0.22 |
| A_51_P498267 | NA        | NA             | NA     | NA                                                    | -1.52 | 0.63 | 0.18 |
| A_52_P263251 | NM_026077 | 3110040N167290 |        | RIKEN cDNA 3110040N11 gene                            | -1.54 | 0.63 | 0.16 |
| A_52_P964362 | AW455994  | NA             | NA     | NA                                                    | -1.50 | 0.63 | 0.20 |
| A_51_P220407 | NM_181405 | Rnpepl1        | 108657 | arginyl aminopeptidase (aminopeptidase B)-like 1      | -1.60 | 0.63 | 0.14 |
| A_52_P439085 | AK164377  | Stk24          | 223255 | serine/threonine kinase 24 (STE20 homolog, yeast)     | -1.32 | 0.63 | 0.40 |
| A_52_P377416 | NM_026866 | Disp1          | 68897  | dispatched homolog 1 (Drosophila)                     | -1.52 | 0.63 | 0.18 |
| A_51_P379399 | NM_172117 | Entpd6         | 12497  | ectonucleoside triphosphate diphosphohydrolase 6      | -1.54 | 0.63 | 0.16 |
| A_52_P594049 | NM_175419 | Actr5          | 109275 | ARP5 actin-related protein 5 homolog (yeast)          | -1.31 | 0.63 | 0.44 |
| A_51_P124748 | NM_009368 | Tgfb3          | 21809  | transforming growth factor, beta 3                    | -1.29 | 0.63 | 0.46 |
| A_52_P180408 | NM_026602 | Bcas2          | 68183  | breast carcinoma amplified sequence 2                 | -1.36 | 0.63 | 0.34 |
| A_51_P281734 | NM_172775 | Plxnb1         | 235611 | plexin B1                                             | -1.28 | 0.63 | 0.46 |
| A_51_P504503 | NM_010091 | Dvl1           | 13542  | dishevelled, dsh homolog 1 (Drosophila)               | -1.45 | 0.63 | 0.22 |
| A_51_P103069 | XM_983304 | NA             | NA     | NA                                                    | -1.31 | 0.63 | 0.44 |
| A_51_P284823 | NM_009086 | Polr1b         | 20017  | polymerase (RNA) I polypeptide B                      | -1.19 | 0.63 | 0.67 |
| A_51_P100565 | NA        | NA             | NA     | NA                                                    | -1.24 | 0.63 | 0.55 |
| A_51_P195237 | NM_181649 | Ccdc75         | 53951  | coiled-coil domain containing 75                      | -1.21 | 0.63 | 0.61 |
| A_51_P490997 | M89786    | Gas2l1         | 78926  | growth arrest-specific 2 like 1                       | -1.33 | 0.63 | 0.40 |
| A_52_P170945 | NM_146178 | Ccdc106        | 232821 | coiled-coil domain containing 106                     | -1.59 | 0.63 | 0.14 |
| A_52_P482825 | NM_019405 | Cetn2          | 26370  | centrin 2                                             | -1.32 | 0.63 | 0.40 |
| A_51_P366542 | NM_011925 | Cd97           | 26364  | CD97 antigen                                          | -1.39 | 0.63 | 0.28 |
| A_51_P250378 | NM_009579 | Slc30a1        | 22782  | solute carrier family 30 (zinc transporter), member 1 | -1.35 | 0.63 | 0.37 |
| A_51_P404377 | NM_009708 | Rnd2           | 11858  | Rho family GTPase 2                                   | -1.42 | 0.63 | 0.27 |
| A_51_P439824 | NM_018771 | Gipc1          | 67903  | GIPC PDZ domain containing family, member 1           | -1.66 | 0.63 | 0.11 |
| A_51_P222773 | NM_010446 | Foxa2          | 15376  | forkhead box A2                                       | -1.18 | 0.63 | 0.67 |
| A_51_P209319 | NM_016752 | Slc35b1        | 110172 | solute carrier family 35, member B1                   | -1.27 | 0.63 | 0.50 |
| A_52_P256929 | NM_008624 | Mras           | 17532  | muscle and microspikes RAS                            | -1.25 | 0.63 | 0.55 |
| A_51_P521128 | NM_019825 | Ncoa6          | 56406  | nuclear receptor coactivator 6                        | -1.55 | 0.63 | 0.16 |
| A_51_P117739 | NM_010216 | Figf           | 14205  | c-fos induced growth factor                           | -1.47 | 0.63 | 0.21 |
| A_51_P402225 | XM_203596 | NA             | NA     | NA                                                    | -1.49 | 0.63 | 0.20 |

|              |           |           |        |                                                              |       |      |      |
|--------------|-----------|-----------|--------|--------------------------------------------------------------|-------|------|------|
| A_52_P298158 | NM_172605 | Tdrd3     | 219249 | tudor domain containing 3                                    | -1.29 | 0.63 | 0.46 |
| A_51_P206971 | NM_008612 | Mnat1     | 17420  | menage a trois 1                                             | -1.55 | 0.63 | 0.16 |
| A_51_P452779 | NM_133198 | Pygl      | 110095 | liver glycogen phosphorylase                                 | -1.94 | 0.63 | 0.03 |
| A_52_P624434 | NM_175526 | Clec1a    | 243653 | C-type lectin domain family 1, member a                      | -1.77 | 0.63 | 0.06 |
| A_52_P485433 | NM_026246 | Mrpl49    | 18120  | mitochondrial ribosomal protein L49                          | -1.32 | 0.63 | 0.40 |
| A_52_P18229  | NM_146156 | Pdik1l    | 230809 | PDLIM1 interacting kinase 1 like                             | -1.60 | 0.63 | 0.14 |
| A_52_P559061 | AK129282  | Spast     | 50850  | spastin                                                      | -1.10 | 0.63 | 0.91 |
| A_52_P539414 | NM_181410 | Gtf2h3    | 209357 | general transcription factor IIH, polypeptide 3              | -1.14 | 0.63 | 0.82 |
| A_52_P99082  | NA        | NA        | NA     | NA                                                           | -1.10 | 0.63 | 0.91 |
| A_52_P494497 | AK078131  | Gtf2a1    | 83602  | general transcription factor II A, 1                         | -1.43 | 0.63 | 0.24 |
| A_51_P506356 | NM_026316 | Aldh3b1   | 67689  | aldehyde dehydrogenase 3 family, member B1                   | -1.38 | 0.63 | 0.30 |
| A_51_P185465 | NM_023596 | Slc29a3   | 71279  | solute carrier family 29 (nucleoside transporters), member 3 | -1.44 | 0.63 | 0.22 |
| A_52_P466741 | NM_011826 | Hax1      | 23897  | HCLS1 associated X-1                                         | -1.45 | 0.63 | 0.22 |
| A_52_P987564 | AK049456  | Wdfy3     | 72145  | WD repeat and FYVE domain containing 3                       | -1.43 | 0.63 | 0.24 |
| A_51_P312310 | NM_134092 | Mtbp      | 105837 | Mdm2, transformed 3T3 cell double minute p53 binding protein | -1.48 | 0.63 | 0.20 |
| A_51_P205170 | NM_146175 | Zfp282    | 101095 | zinc finger protein 282                                      | -1.58 | 0.63 | 0.15 |
| A_51_P359586 | NM_008824 | Pfkfb1    | 18639  | 6-phosphofructo-2-kinase/fructose-2,6-biphosphatase 1        | -1.48 | 0.63 | 0.20 |
| A_52_P502461 | NM_029862 | 5930434B0 | 381356 | RIKEN cDNA 5930434B04 gene                                   | -1.56 | 0.63 | 0.15 |
| A_51_P297470 | NM_025511 | Fam36a    | 66359  | family with sequence similarity 36, member A                 | -1.31 | 0.63 | 0.44 |
| A_51_P269320 | NM_009634 | Adsl      | 11564  | adenylosuccinate lyase                                       | -1.58 | 0.63 | 0.15 |
| A_52_P535052 | NM_198023 | Rcor1     | 217864 | REST corepressor 1                                           | -1.31 | 0.63 | 0.40 |
| A_51_P224575 | NM_010322 | Gnpat     | 14712  | glyceronephosphate O-acyltransferase                         | -1.79 | 0.63 | 0.06 |
| A_51_P103780 | NM_145512 | Sft2d2    | 108735 | SFT2 domain containing 2                                     | -1.31 | 0.63 | 0.40 |
| A_51_P468418 | NM_145618 | Narg2     | 93697  | NMDA receptor-regulated gene 2                               | -1.23 | 0.63 | 0.55 |
| A_51_P406145 | NM_025509 | Ostc      | 66357  | oligosaccharyltransferase complex subunit                    | -1.29 | 0.63 | 0.46 |
| A_52_P281820 | NM_029793 | Golga1    | 76899  | golgi autoantigen, golgin subfamily a, 1                     | -1.13 | 0.63 | 0.82 |
| A_51_P376789 | NM_145387 | Ath1l     | 212974 | ATH1, acid trehalase-like 1 (yeast)                          | -1.64 | 0.63 | 0.11 |
| A_51_P208701 | NM_178051 | Mterfd2   | 69821  | MTERF domain containing 2                                    | -1.30 | 0.63 | 0.44 |
| A_52_P396239 | NM_153573 | Fkbp14    | 231997 | FK506 binding protein 14                                     | -1.11 | 0.63 | 0.91 |
| A_51_P378777 | NM_029090 | Nat15     | 74763  | N-acetyltransferase 15 (GCN5-related, putative)              | -1.29 | 0.63 | 0.46 |
| A_51_P225832 | NM_028314 | 2700097O0 | 72658  | RIKEN cDNA 2700097O09 gene                                   | -1.09 | 0.63 | 0.97 |

|              |                     |        |                                                             |       |      |      |
|--------------|---------------------|--------|-------------------------------------------------------------|-------|------|------|
| A_52_P277104 | NM_001033: Bank1    | 242248 | B-cell scaffold protein with ankyrin repeats 1              | -1.50 | 0.63 | 0.20 |
| A_51_P207706 | NM_173375 Fam180a   | 208164 | family with sequence similarity 180, member A               | -1.44 | 0.63 | 0.22 |
| A_51_P106752 | NM_026440 Rnmt      | 67897  | RNA (guanine-7-) methyltransferase                          | -1.49 | 0.63 | 0.20 |
| A_51_P408609 | NM_011989 Slc27a4   | 26569  | solute carrier family 27 (fatty acid transporter), member 4 | -1.78 | 0.63 | 0.06 |
| A_51_P357341 | NM_033444 Clic1     | 114584 | chloride intracellular channel 1                            | -1.27 | 0.63 | 0.50 |
| A_52_P54238  | NM_178919 Lmf2      | 105847 | lipase maturation factor 2                                  | -1.87 | 0.63 | 0.04 |
| A_52_P284346 | NM_133976 Imp3      | 102462 | IMP3, U3 small nucleolar ribonucleoprotein, homolog (yeast) | -1.53 | 0.63 | 0.17 |
| A_52_P70235  | AK035426 Cdkn2aip   | 70925  | CDKN2A interacting protein                                  | -1.27 | 0.63 | 0.50 |
| A_52_P474797 | NM_175109 Rps19bp1  | 66538  | ribosomal protein S19 binding protein 1                     | -1.31 | 0.63 | 0.44 |
| A_51_P140368 | NM_026844 2310061C1 | 66531  | RIKEN cDNA 2310061C15 gene                                  | -1.60 | 0.63 | 0.13 |
| A_51_P482600 | AK006780 Btf3       | 218490 | basic transcription factor 3                                | -1.38 | 0.63 | 0.30 |
| A_51_P202440 | NM_011243 Rarb      | 218772 | retinoic acid receptor, beta                                | -1.40 | 0.63 | 0.28 |
| A_51_P466759 | NM_028993 9130404D0 | 74549  | RIKEN cDNA 9130404D08 gene                                  | -1.29 | 0.63 | 0.46 |
| A_52_P339182 | NM_017463 Pbx2      | 18515  | pre B-cell leukemia transcription factor 2                  | -1.81 | 0.63 | 0.05 |
| A_51_P211325 | NM_025539 Nudt2     | 66401  | nudix (nucleoside diphosphate linked moiety X)-type motif 2 | -1.86 | 0.63 | 0.04 |
| A_52_P260676 | AK053668 Smek1      | 68734  | SMEK homolog 1, suppressor of mek1 (Dictyostelium)          | -1.39 | 0.63 | 0.30 |
| A_52_P23576  | AK030792 Ccdc148    | 227933 | coiled-coil domain containing 148                           | -2.00 | 0.63 | 0.02 |
| A_51_P118720 | NM_026274 Rspry1    | 67610  | ring finger and SPRY domain containing 1                    | -1.36 | 0.63 | 0.34 |
| A_51_P102789 | NM_007574 C1qc      | 12262  | complement component 1, q subcomponent, C chain             | -1.37 | 0.63 | 0.33 |
| A_52_P113465 | AK173007 Kif1c      | 16562  | kinesin family member 1C                                    | -1.59 | 0.63 | 0.14 |
| A_52_P118560 | NM_027552 Kynu      | 70789  | kynureninase (L-kynurenine hydrolase)                       | -1.70 | 0.63 | 0.09 |
| A_51_P513785 | NM_007794 Ctf       | 13018  | CCCTC-binding factor                                        | -1.84 | 0.63 | 0.04 |
| A_51_P213592 | XM_484171 BC002230  | 217827 | cDNA sequence BC002230                                      | -1.82 | 0.63 | 0.05 |
| A_51_P412705 | AK042960 NA         | NA     | NA                                                          | -1.17 | 0.63 | 0.70 |
| A_52_P434009 | NM_001024 NA        | NA     | NA                                                          | -1.66 | 0.63 | 0.11 |
| A_51_P407638 | DV066569 NA         | NA     | NA                                                          | -1.37 | 0.63 | 0.33 |
| A_52_P324574 | NM_026485 Trabd     | 67976  | TraB domain containing                                      | -1.19 | 0.63 | 0.67 |
| A_51_P485791 | NM_020010 Cyp51     | 13121  | cytochrome P450, family 51                                  | -1.20 | 0.63 | 0.61 |
| A_52_P19016  | NM_016680 Sfrs16    | 53609  | splicing factor, arginine/serine-rich 16                    | -1.17 | 0.63 | 0.77 |

|              |           |           |        |                                                                                                                      |       |      |      |
|--------------|-----------|-----------|--------|----------------------------------------------------------------------------------------------------------------------|-------|------|------|
| A_51_P468294 | NM_017462 | Polg      | 18975  | polymerase (DNA directed), gamma                                                                                     | -1.68 | 0.63 | 0.10 |
| A_51_P317505 | NM_008673 | Nat1      | 17960  | N-acetyl transferase 1                                                                                               | -1.61 | 0.63 | 0.13 |
| A_51_P450955 | NM_176830 | 11100360C | 66180  | RIKEN cDNA 11100360O3 gene                                                                                           | -1.26 | 0.63 | 0.53 |
| A_52_P636343 | NM_178398 | Wipi2     | 74781  | WD repeat domain, phosphoinositide interacting 2                                                                     | -1.66 | 0.63 | 0.11 |
| A_51_P362161 | NM_033526 | Ubqln4    | 94232  | ubiquilin 4                                                                                                          | -1.42 | 0.63 | 0.27 |
| A_51_P322989 | BC067010  | 2410017P0 | 69709  | RIKEN cDNA 2410017P09 gene                                                                                           | -1.40 | 0.63 | 0.28 |
| A_52_P189246 | BC066847  | Mtm1      | 17772  | X-linked myotubular myopathy gene 1                                                                                  | -1.42 | 0.63 | 0.27 |
| A_51_P393671 | BC024498  | Tm6sf2    | 107770 | transmembrane 6 superfamily member 2                                                                                 | -1.59 | 0.63 | 0.14 |
| A_51_P313761 | NM_028230 | Shmt2     | 108037 | serine hydroxymethyltransferase 2 (mitochondrial)                                                                    | -1.44 | 0.63 | 0.22 |
| A_52_P90507  | NM_172499 | Mfsd9     | 211798 | major facilitator superfamily domain containing 9                                                                    | -1.49 | 0.63 | 0.20 |
| A_52_P33     | NM_025667 | Tmem222   | 52174  | transmembrane protein 222                                                                                            | -1.64 | 0.63 | 0.11 |
| A_52_P614336 | NM_011116 | Pld3      | 18807  | phospholipase D family, member 3                                                                                     | -1.50 | 0.63 | 0.20 |
| A_51_P511927 | NM_026183 | Slc47a1   | 67473  | solute carrier family 47, member 1                                                                                   | -1.46 | 0.63 | 0.21 |
| A_52_P571591 | NM_011791 | Ash2l     | 23808  | ash2 (absent, small, or homeotic)-like (Drosophila)                                                                  | -1.49 | 0.63 | 0.20 |
| A_52_P575020 | AK078599  | Crls1     | 66586  | cardiolipin synthase 1                                                                                               | -1.53 | 0.63 | 0.17 |
| A_51_P357207 | XM_899439 | NA        | NA     | NA                                                                                                                   | -1.53 | 0.63 | 0.17 |
| A_51_P408989 | NM_026038 | 2810055F1 | 67217  | RIKEN cDNA 2810055F11 gene                                                                                           | -1.40 | 0.63 | 0.28 |
| A_52_P173470 | NM_027493 | Actr8     | 56249  | ARP8 actin-related protein 8 homolog ( <i>S. cerevisiae</i> )                                                        | -1.38 | 0.63 | 0.30 |
| A_51_P157554 | NM_012047 | Brd7      | 26992  | bromodomain containing 7                                                                                             | -1.68 | 0.63 | 0.10 |
| A_51_P444092 | NM_011999 | Clec4a2   | 26888  | C-type lectin domain family 4, member a2<br>small glutamine-rich tetratricopeptide repeat (TPR)-<br>containing, beta | -1.59 | 0.62 | 0.14 |
| A_51_P433769 | NM_144838 | Sgtb      | 218544 | containing, beta                                                                                                     | -1.47 | 0.62 | 0.21 |
| A_52_P264229 | NM_025454 | Ing5      | 66262  | inhibitor of growth family, member 5                                                                                 | -1.34 | 0.62 | 0.37 |
| A_51_P198076 | NM_025559 | 1810046J1 | 103742 | RIKEN cDNA 1810046J19 gene                                                                                           | -1.72 | 0.62 | 0.07 |
| A_51_P376258 | NM_008133 | Glud1     | 14661  | glutamate dehydrogenase 1                                                                                            | -1.41 | 0.62 | 0.27 |
| A_52_P83419  | BC021536  | 0610012G0 | 106264 | RIKEN cDNA 0610012G03 gene                                                                                           | -1.48 | 0.62 | 0.20 |
| A_52_P41545  | NM_172513 | Fam126b   | 213056 | family with sequence similarity 126, member B                                                                        | -1.33 | 0.62 | 0.37 |
| A_51_P234174 | NM_008886 | Pms2      | 18861  | postmeiotic segregation increased 2 ( <i>S. cerevisiae</i> )                                                         | -1.61 | 0.62 | 0.13 |
| A_52_P458000 | NM_178901 | AI467606  | 101602 | expressed sequence AI467606                                                                                          | -1.49 | 0.62 | 0.20 |

|               |           |           |        |                                                                                                   |       |      |      |
|---------------|-----------|-----------|--------|---------------------------------------------------------------------------------------------------|-------|------|------|
| A_52_P515057  | NM_172685 | Slc25a24  | 229731 | solute carrier family 25 (mitochondrial carrier, phosphate carrier), member 24                    | -1.43 | 0.62 | 0.24 |
| A_51_P346523  | NM_177027 | Zcchc7    | 319885 | zinc finger, CCHC domain containing 7                                                             | -1.13 | 0.62 | 0.86 |
| A_52_P1197653 | CB590277  | Uvrag     | 78610  | UV radiation resistance associated gene                                                           | -1.48 | 0.62 | 0.20 |
| A_52_P102248  | XM_620516 | Mex3b     | 108797 | mex3 homolog B (C. elegans)                                                                       | -1.81 | 0.62 | 0.05 |
| A_52_P555235  | NM_026446 | Rgs19     | 56470  | regulator of G-protein signaling 19                                                               | -1.29 | 0.62 | 0.46 |
| A_51_P329966  | NM_138594 | D6Wsu163  | 28040  | DNA segment, Chr 6, Wayne State University 163, expressed                                         | -1.56 | 0.62 | 0.15 |
| A_51_P376313  | NM_173719 | Med8      | 80509  | mediator of RNA polymerase II transcription, subunit 8 homolog (yeast)                            | -1.57 | 0.62 | 0.15 |
| A_52_P182741  | NM_020618 | Smarce1   | 57376  | SWI/SNF related, matrix associated, actin dependent regulator of chromatin, subfamily e, member 1 | -1.47 | 0.62 | 0.21 |
| A_51_P484027  | NM_134158 | AF251705  | 140497 | cDNA sequence AF251705                                                                            | -1.52 | 0.62 | 0.18 |
| A_52_P551154  | NA        | NA        | NA     | NA                                                                                                | -1.26 | 0.62 | 0.53 |
| A_52_P158305  | AK148028  | 2810002D1 | 166457 | RIKEN cDNA 2810002D19 gene                                                                        | -1.50 | 0.62 | 0.20 |
| A_51_P120461  | NM_025910 | Mina      | 67014  | myc induced nuclear antigen                                                                       | -1.85 | 0.62 | 0.04 |
| A_51_P155843  | XM_887155 | Igsf10    | 242050 | immunoglobulin superfamily, member 10                                                             | -1.39 | 0.62 | 0.28 |
| A_51_P515173  | NM_172941 | Zkscan17  | 268417 | zinc finger with KRAB and SCAN domains 17                                                         | -1.61 | 0.62 | 0.13 |
| A_52_P431965  | NM_134134 | Hmgxb3    | 106894 | HMG box domain containing 3                                                                       | -1.52 | 0.62 | 0.18 |
| A_52_P169198  | AK014097  | Rdh14     | 105014 | retinol dehydrogenase 14 (all-trans and 9-cis)                                                    | -1.48 | 0.62 | 0.20 |
| A_51_P188704  | AK170263  | Unc13a    | 382018 | unc-13 homolog A (C. elegans)                                                                     | -1.48 | 0.62 | 0.20 |
| A_52_P658513  | NM_009057 | Rag1ap1   | 19729  | recombination activating gene 1 activating protein 1                                              | -1.48 | 0.62 | 0.20 |
| A_52_P559498  | NM_007713 | Clk3      | 102414 | CDC-like kinase 3                                                                                 | -1.74 | 0.62 | 0.07 |
| A_51_P477285  | AK090016  | 1810014B0 | 66263  | RIKEN cDNA 1810014B01 gene                                                                        | -1.33 | 0.62 | 0.40 |
| A_52_P423574  | NM_021390 | Sall1     | 58198  | sal-like 1 (Drosophila)                                                                           | -1.52 | 0.62 | 0.18 |
| A_52_P370353  | NM_178616 | Psmd11    | 69077  | proteasome (prosome, macropain) 26S subunit, non-ATPase, 11                                       | -1.64 | 0.62 | 0.11 |
| A_52_P196743  | NM_026450 | Zfp169    | 67911  | zinc finger protein 169                                                                           | -1.63 | 0.62 | 0.11 |
| A_51_P199866  | NM_023371 | Pin1      | 23988  | protein (peptidyl-prolyl cis/trans isomerase) NIMA-interacting 1                                  | -1.66 | 0.62 | 0.11 |
| A_51_P312748  | NM_027695 | Oxsm      | 71147  | 3-oxoacyl-ACP synthase, mitochondrial                                                             | -1.46 | 0.62 | 0.21 |
| A_51_P258465  | NM_153161 | BC037034  | 231807 | cDNA sequence BC037034                                                                            | -1.74 | 0.62 | 0.07 |

|              |           |                 |        |                                                                                |       |      |      |
|--------------|-----------|-----------------|--------|--------------------------------------------------------------------------------|-------|------|------|
| A_52_P337478 | NM_028874 | Snx19           | 102607 | sorting nexin 19                                                               | -1.59 | 0.62 | 0.14 |
| A_51_P303640 | NM_023651 | Pex13           | 72129  | peroxisomal biogenesis factor 13                                               | -1.63 | 0.62 | 0.12 |
| A_51_P130447 | AK050586  | C920006O1320295 |        | RIKEN cDNA C920006O11 gene                                                     | -1.50 | 0.62 | 0.20 |
| A_52_P37826  | NM_029653 | Dapk1           | 69635  | death associated protein kinase 1                                              | -1.14 | 0.62 | 0.82 |
| A_51_P267494 | NM_026514 | Cdc42ep3        | 260409 | CDC42 effector protein (Rho GTPase binding) 3                                  | -1.41 | 0.62 | 0.28 |
| A_52_P584236 | NM_009682 | Ap3s2           | 11778  | adaptor-related protein complex 3, sigma 2 subunit                             | -1.49 | 0.62 | 0.20 |
| A_51_P312528 | NM_020004 | Kat2a           | 14534  | K(llysine) acetyltransferase 2A<br>SPC24, NDC80 kinetochore complex component, | -1.65 | 0.62 | 0.11 |
| A_51_P214209 | NM_026282 | Spc24           | 67629  | homolog (S. cerevisiae)                                                        | -1.10 | 0.62 | 0.97 |
| A_52_P748067 | AI608034  | NA              | NA     | NA                                                                             | -1.49 | 0.62 | 0.20 |
| A_51_P245631 | NM_028713 | Rftn2           | 74013  | raftlin family member 2                                                        | -1.58 | 0.62 | 0.15 |
| A_51_P153289 | NM_026522 | Chid1           | 68038  | chitinase domain containing 1                                                  | -1.55 | 0.62 | 0.16 |
| A_52_P429364 | NM_177471 | Ccdc69          | 52570  | coiled-coil domain containing 69                                               | -1.31 | 0.62 | 0.44 |
| A_52_P179011 | NM_177312 | 6330408AC321008 |        | RIKEN cDNA 6330408A02 gene                                                     | -1.60 | 0.62 | 0.14 |
| A_51_P212630 | NM_201637 | Chd8            | 67772  | chromodomain helicase DNA binding protein 8                                    | -1.20 | 0.62 | 0.61 |
| A_52_P40293  | NM_013547 | Hgd             | 15233  | homogentisate 1, 2-dioxygenase                                                 | -1.19 | 0.62 | 0.67 |
| A_52_P674418 | NM_175128 | 4930430F068281  |        | RIKEN cDNA 4930430F08 gene                                                     | -1.35 | 0.62 | 0.34 |
| A_52_P250865 | CJ243128  | NA              | NA     | NA                                                                             | -1.41 | 0.62 | 0.27 |
| A_51_P358112 | NM_146094 | Fads1           | 76267  | fatty acid desaturase 1                                                        | -1.26 | 0.62 | 0.53 |
| A_52_P273748 | NM_028130 | Zfp157          | 72154  | zinc finger protein 157                                                        | -1.70 | 0.62 | 0.09 |
| A_51_P454993 | NM_178874 | Tmcc2           | 68875  | transmembrane and coiled-coil domains 2                                        | -1.44 | 0.62 | 0.24 |
| A_51_P411007 | NM_013812 | Cdk2ap1         | 13445  | CDK2 (cyclin-dependent kinase 2)-associated protein 1                          | -1.45 | 0.62 | 0.22 |
| A_51_P296416 | NM_019716 | Orc6l           | 56452  | origin recognition complex, subunit 6-like (S. cerevisiae)                     | -1.55 | 0.62 | 0.16 |
| A_52_P652442 | NM_013646 | Rora            | 19883  | RAR-related orphan receptor alpha                                              | -1.14 | 0.62 | 0.82 |
| A_51_P278334 | NM_013703 | Vldlr           | 22359  | very low density lipoprotein receptor                                          | -1.22 | 0.62 | 0.61 |
| A_51_P198387 | NM_026765 | Uckl1           | 68556  | uridine-cytidine kinase 1-like 1                                               | -1.42 | 0.62 | 0.27 |
| A_52_P552589 | NM_008279 | Map4k1          | 26411  | mitogen-activated protein kinase kinase kinase kinase 1                        | -1.27 | 0.62 | 0.50 |
| A_52_P621567 | CO038910  | NA              | NA     | NA                                                                             | -1.41 | 0.62 | 0.27 |
| A_52_P657963 | AK045618  | Phka2           | 110094 | phosphorylase kinase alpha 2                                                   | -1.59 | 0.62 | 0.14 |
| A_52_P659448 | AK078975  | 1E+08           | 1E+08  | predicted gene, 100042802                                                      | -1.12 | 0.62 | 0.86 |

|              |           |           |        |                                                                                                                          |       |      |      |
|--------------|-----------|-----------|--------|--------------------------------------------------------------------------------------------------------------------------|-------|------|------|
| A_51_P103509 | NM_019720 | Cyb561d2  | 56368  | cytochrome b-561 domain containing 2                                                                                     | -1.55 | 0.62 | 0.16 |
| A_51_P279163 | NM_172285 | Plcg2     | 234779 | phospholipase C, gamma 2                                                                                                 | -1.56 | 0.62 | 0.15 |
| A_51_P400868 | NM_001032 | Pecam1    | 18613  | platelet/endothelial cell adhesion molecule 1                                                                            | -1.58 | 0.62 | 0.15 |
| A_51_P183912 | NM_016671 | Il27ra    | 50931  | interleukin 27 receptor, alpha                                                                                           | -1.46 | 0.62 | 0.21 |
| A_51_P118650 | NM_031392 | Wdr6      | 83669  | WD repeat domain 6                                                                                                       | -1.58 | 0.62 | 0.15 |
| A_52_P61265  | BC012698  | NA        | NA     | NA                                                                                                                       | -1.44 | 0.62 | 0.24 |
| A_51_P468173 | NM_008251 | Hmgn1     | 15312  | high mobility group nucleosomal binding domain 1                                                                         | -1.61 | 0.62 | 0.13 |
| A_51_P271697 | NM_145608 | BC021891  | 234878 | cDNA sequence BC021891                                                                                                   | -1.55 | 0.62 | 0.16 |
| A_52_P108808 | NA        | NA        | NA     | NA                                                                                                                       | -1.35 | 0.62 | 0.37 |
| A_51_P485391 | NM_028761 | Parn      | 74108  | poly(A)-specific ribonuclease (deadenylation nuclease)                                                                   | -1.81 | 0.62 | 0.05 |
| A_52_P883800 | AK051623  | Bag4      | 67384  | BCL2-associated athanogene 4                                                                                             | -1.67 | 0.62 | 0.10 |
| A_51_P492676 | NM_138665 | Sardh     | 192166 | sarcosine dehydrogenase                                                                                                  | -1.64 | 0.62 | 0.11 |
| A_51_P261107 | NM_139144 | Ogt       | 108155 | O-linked N-acetylglucosamine (GlcNAc) transferase (UDP-N-acetylglucosamine:polypeptide-N-acetylglucosaminyl transferase) | -1.27 | 0.62 | 0.50 |
| A_52_P435356 | NM_028071 | Cotl1     | 72042  | coactosin-like 1 (Dictyostelium)                                                                                         | -1.57 | 0.62 | 0.15 |
| A_52_P306537 | NM_146157 | C230096C1 | 230866 | RIKEN cDNA C230096C10 gene                                                                                               | -1.42 | 0.62 | 0.27 |
| A_51_P434776 | NM_028101 | Jmjd8     | 72106  | jumonji domain containing 8                                                                                              | -1.53 | 0.62 | 0.17 |
| A_52_P818642 | AK018045  | 5830469G  | 176093 | RIKEN cDNA 5830469G19 gene                                                                                               | -1.52 | 0.62 | 0.17 |
| A_51_P378825 | NM_027493 | Actr8     | 56249  | ARP8 actin-related protein 8 homolog ( <i>S. cerevisiae</i> )                                                            | -1.67 | 0.62 | 0.10 |
| A_52_P677272 | NM_177262 | Pkn1      | 320795 | protein kinase N1                                                                                                        | -1.58 | 0.62 | 0.15 |
| A_52_P313080 | NM_010448 | Hnrnpab   | 15384  | heterogeneous nuclear ribonucleoprotein A/B                                                                              | -1.20 | 0.62 | 0.67 |
| A_52_P97699  | BC058677  | D430019H  | 268595 | RIKEN cDNA D430019H16 gene                                                                                               | -1.18 | 0.62 | 0.70 |
| A_52_P108021 | BC030902  | D430042O  | 233865 | RIKEN cDNA D430042O09 gene                                                                                               | -1.72 | 0.62 | 0.07 |
| A_52_P579876 | NM_178622 | Suds3     | 71954  | suppressor of defective silencing 3 homolog ( <i>S. cerevisiae</i> )                                                     | -1.52 | 0.62 | 0.18 |
| A_51_P452768 | NM_022434 | Cyp4f14   | 64385  | cytochrome P450, family 4, subfamily f, polypeptide 14                                                                   | -1.35 | 0.62 | 0.34 |
| A_51_P108252 | NM_029522 | Gpsm2     | 76123  | G-protein signalling modulator 2 (AGS3-like, <i>C. elegans</i> )                                                         | -1.71 | 0.62 | 0.09 |

|              |           |           |        |                                                                              |       |      |      |
|--------------|-----------|-----------|--------|------------------------------------------------------------------------------|-------|------|------|
| A_52_P411305 | AK083363  | Tsc1      | 64930  | tuberous sclerosis 1                                                         | -1.51 | 0.62 | 0.20 |
| A_51_P190805 | NM_007456 | Ap1m1     | 11767  | adaptor-related protein complex AP-1, mu subunit 1                           | -1.67 | 0.62 | 0.10 |
| A_51_P397548 | NM_175374 | Mtrf1l    | 108853 | mitochondrial translational release factor 1-like                            | -1.71 | 0.62 | 0.09 |
| A_51_P166244 | BC076637  | Osbpl1a   | 64291  | oxysterol binding protein-like 1A                                            | -1.60 | 0.62 | 0.14 |
| A_52_P168449 | NM_011161 | Mapk11    | 19094  | mitogen-activated protein kinase 11                                          | -1.51 | 0.62 | 0.20 |
| A_52_P167249 | NM_013758 | Add3      | 27360  | adducin 3 (gamma)<br>HECT, C2 and WW domain containing E3 ubiquitin          | -1.33 | 0.62 | 0.40 |
| A_52_P153685 | AK129325  | Hecw2     | 329152 | protein ligase 2                                                             | -1.75 | 0.62 | 0.07 |
| A_52_P81630  | AK012631  | 2810001G2 | 66456  | RIKEN cDNA 2810001G20 gene                                                   | -1.54 | 0.62 | 0.16 |
| A_52_P683315 | NM_134089 | Scrib     | 105782 | scribbled homolog (Drosophila)                                               | -1.69 | 0.62 | 0.09 |
| A_52_P83233  | NM_011728 | Xpa       | 22590  | xeroderma pigmentosum, complementation group A                               | -1.59 | 0.62 | 0.14 |
| A_51_P461219 | NM_178693 | Coq4      | 227683 | coenzyme Q4 homolog (yeast)                                                  | -1.64 | 0.62 | 0.11 |
| A_51_P424810 | NM_133762 | Ncapg2    | 76044  | non-SMC condensin II complex, subunit G2                                     | -1.79 | 0.62 | 0.06 |
| A_52_P567306 | NM_010688 | Lasp1     | 16796  | LIM and SH3 protein 1                                                        | -1.61 | 0.62 | 0.13 |
| A_52_P562769 | NM_177111 | Ccdc66    | 320234 | coiled-coil domain containing 66                                             | -1.15 | 0.62 | 0.82 |
| A_51_P375453 | NM_139298 | Wnt9a     | 216795 | wingless-type MMTV integration site 9A                                       | -1.61 | 0.62 | 0.13 |
| A_51_P327920 | AK030273  | St7l      | 229681 | suppression of tumorigenicity 7-like                                         | -1.31 | 0.62 | 0.44 |
| A_52_P671013 | AK020497  | 9430079G2 | 77291  | RIKEN cDNA 9430079G20 gene                                                   | -1.11 | 0.62 | 0.86 |
| A_52_P325900 | BC072644  | Cdc14a    | 229776 | CDC14 cell division cycle 14 homolog A ( <i>S. cerevisiae</i> )              | -1.54 | 0.62 | 0.16 |
| A_52_P56606  | NM_173015 | Mon1b     | 270096 | MON1 homolog b (yeast)                                                       | -1.38 | 0.62 | 0.30 |
| A_51_P159711 | NM_053070 | Car7      | 12354  | carbonic anhydrase 7<br>protein kinase, AMP-activated, gamma 1 non-catalytic | -1.39 | 0.62 | 0.30 |
| A_52_P273546 | NM_016781 | Prkag1    | 19082  | subunit                                                                      | -1.52 | 0.62 | 0.18 |
| A_52_P392247 | NM_027590 | Ints10    | 70885  | integrator complex subunit 10                                                | -1.09 | 0.62 | 0.97 |
| A_52_P580842 | NM_023314 | Eif4e2    | 26987  | eukaryotic translation initiation factor 4E member 2                         | -1.59 | 0.62 | 0.14 |
| A_52_P349467 | AK051339  | Tmlhe     | 192289 | trimethyllysine hydroxylase, epsilon                                         | -1.65 | 0.62 | 0.11 |
| A_52_P4201   | NM_008092 | Gata4     | 14463  | GATA binding protein 4                                                       | -1.65 | 0.62 | 0.11 |
| A_51_P384436 | NM_001033 | Ctrc      | 76701  | chymotrypsin C (caldecrin)                                                   | -1.41 | 0.62 | 0.27 |
| A_52_P339742 | NM_029787 | Cyb5r3    | 109754 | cytochrome b5 reductase 3                                                    | -1.88 | 0.62 | 0.04 |
| A_52_P342015 | NA        | NA        | NA     | NA                                                                           | -1.42 | 0.62 | 0.27 |



|              |           |           |        |                                                                                                |       |      |      |
|--------------|-----------|-----------|--------|------------------------------------------------------------------------------------------------|-------|------|------|
| A_51_P355243 | AK028520  | Pstk      | 214580 | phosphoseryl-tRNA kinase                                                                       | -1.57 | 0.62 | 0.15 |
| A_51_P402267 | NM_134069 | Slc17a3   | 105355 | solute carrier family 17 (sodium phosphate), member 3                                          | -1.34 | 0.62 | 0.37 |
| A_52_P462239 | AK084087  | D130020G  | 320972 | RIKEN cDNA D130020G16 gene                                                                     | -1.68 | 0.62 | 0.10 |
| A_51_P464838 | AF208109  | Il17rb    | 50905  | interleukin 17 receptor B                                                                      | -1.39 | 0.62 | 0.30 |
| A_51_P292127 | NM_027629 | Pgm211    | 70974  | phosphoglucomutase 2-like 1                                                                    | -1.20 | 0.62 | 0.61 |
| A_51_P471940 | AK156814  | Mrpl44    | 69163  | mitochondrial ribosomal protein L44                                                            | -1.63 | 0.62 | 0.11 |
| A_51_P463849 | NM_009541 | Zbtb17    | 22642  | zinc finger and BTB domain containing 17                                                       | -1.75 | 0.62 | 0.07 |
| A_51_P431047 | NM_009182 | St8sia3   | 20451  | ST8 alpha-N-acetyl-neuraminide alpha-2,8-sialyltransferase 3                                   | -1.24 | 0.62 | 0.55 |
| A_51_P129557 | NM_028756 | Slc35a5   | 74102  | solute carrier family 35, member A5                                                            | -1.42 | 0.62 | 0.27 |
| A_52_P529790 | AK162596  | Ppip5k1   | 327655 | diphosphoinositol pentakisphosphate kinase 1                                                   | -1.38 | 0.62 | 0.30 |
| A_52_P27012  | NM_028284 | Bbs5      | 72569  | Bardet-Biedl syndrome 5 (human)                                                                | -1.44 | 0.62 | 0.22 |
| A_51_P506915 | NM_019762 | Pkp3      | 56460  | plakophilin 3                                                                                  | -1.59 | 0.62 | 0.14 |
| A_51_P303791 | AK035610  | 9530076L1 | 328192 | hypothetical protein 9530076L18                                                                | -1.23 | 0.62 | 0.58 |
| A_51_P238165 | X68951    | NA        | NA     | NA                                                                                             | -1.36 | 0.62 | 0.34 |
| A_51_P220162 | NM_008716 | Notch3    | 18131  | Notch gene homolog 3 (Drosophila)                                                              | -1.54 | 0.62 | 0.16 |
| A_52_P338059 | AK009216  | Naif1     | 71254  | nuclear apoptosis inducing factor 1                                                            | -1.62 | 0.62 | 0.12 |
| A_51_P476660 | XM_890447 | Mllt4     | 17356  | myeloid/lymphoid or mixed-lineage leukemia (trithorax homolog, Drosophila); translocated to, 4 | -1.27 | 0.62 | 0.50 |
| A_51_P227108 | NM_029752 | Bri3bp    | 76809  | Bri3 binding protein                                                                           | -1.64 | 0.62 | 0.11 |
| A_51_P518586 | NM_013536 | Emg1      | 14791  | EMG1 nucleolar protein homolog (S. cerevisiae)                                                 | -1.43 | 0.62 | 0.24 |
| A_52_P496775 | BC075636  | Vangl2    | 93840  | vang-like 2 (van gogh, Drosophila)                                                             | -1.54 | 0.62 | 0.16 |
| A_51_P108923 | AK035046  | NA        | NA     | NA                                                                                             | -2.03 | 0.62 | 0.02 |
| A_52_P5454   | NM_054042 | Cd248     | 70445  | CD248 antigen, endosialin                                                                      | -1.73 | 0.62 | 0.07 |
| A_51_P395164 | NM_145122 | Pex16     | 18633  | peroxisomal biogenesis factor 16                                                               | -1.52 | 0.62 | 0.18 |
| A_52_P513041 | AK220506  | Fry       | 320365 | furry homolog (Drosophila)                                                                     | -1.68 | 0.62 | 0.10 |
| A_51_P430585 | NM_026740 | Slc46a1   | 52466  | solute carrier family 46, member 1                                                             | -1.20 | 0.62 | 0.61 |
| A_52_P596755 | NM_207161 | BC048355  | 381101 | cDNA sequence BC048355                                                                         | -1.43 | 0.62 | 0.24 |
| A_51_P262230 | NM_145466 | A2ld1     | 223267 | AIG2-like domain 1                                                                             | -1.54 | 0.62 | 0.16 |
| A_51_P367563 | NM_025789 | Rsph3a    | 66832  | radial spoke 3A homolog (Chlamydomonas)                                                        | -1.55 | 0.62 | 0.16 |
| A_51_P368894 | NM_008262 | Onecut1   | 15379  | one cut domain, family member 1                                                                | -1.41 | 0.62 | 0.27 |
| A_51_P244531 | AK147342  | 6330403L0 | 70744  | RIKEN cDNA 6330403L08 gene                                                                     | -1.24 | 0.62 | 0.55 |

|              |           |           |        |                                                                                            |       |      |      |
|--------------|-----------|-----------|--------|--------------------------------------------------------------------------------------------|-------|------|------|
| A_52_P504771 | NM_016882 | Sart1     | 20227  | squamous cell carcinoma antigen recognized by T-cells 1                                    | -1.60 | 0.62 | 0.13 |
| A_51_P385635 | NM_026744 | Mrpl53    | 68499  | mitochondrial ribosomal protein L53                                                        | -1.97 | 0.62 | 0.03 |
| A_52_P947482 | AK045058  | NA        | NA     | NA                                                                                         | -1.42 | 0.62 | 0.27 |
| A_52_P44824  | NA        | NA        | NA     | NA                                                                                         | -1.50 | 0.62 | 0.20 |
| A_52_P252195 | NM_027388 | Pigw      | 70325  | phosphatidylinositol glycan anchor biosynthesis, class W                                   | -1.72 | 0.62 | 0.07 |
| A_52_P160518 | NM_019460 | Sfmbt1    | 54650  | Scm-like with four mbt domains 1                                                           | -1.23 | 0.62 | 0.58 |
| A_51_P336391 | NM_172049 | Tmem18    | 211986 | transmembrane protein 18                                                                   | -1.31 | 0.62 | 0.44 |
| A_51_P344878 | NM_022653 | Thop1     | 50492  | thimet oligopeptidase 1                                                                    | -1.66 | 0.62 | 0.11 |
| A_51_P110931 | NM_029602 | 1700022C2 | 76416  | RIKEN cDNA 1700022C21 gene                                                                 | -1.66 | 0.62 | 0.11 |
| A_52_P325029 | BC067037  | 2210009G2 | 74243  | RIKEN cDNA 2210009G21 gene                                                                 | -1.71 | 0.62 | 0.07 |
| A_51_P413419 | NM_019761 | Nxt1      | 56488  | NTF2-related export protein 1                                                              | -1.57 | 0.62 | 0.15 |
| A_51_P182462 | NM_010688 | Lasp1     | 16796  | LIM and SH3 protein 1                                                                      | -1.51 | 0.62 | 0.18 |
| A_51_P317272 | NM_001024 | Bod1      | 69556  | bioorientation of chromosomes in cell division 1                                           | -1.81 | 0.62 | 0.05 |
| A_52_P577291 | AK140834  | Gm3626    | 1E+08  | predicted gene 3626                                                                        | -1.66 | 0.62 | 0.11 |
| A_51_P220723 | NM_026592 | B230118H0 | 68170  | RIKEN cDNA B230118H07 gene                                                                 | -1.26 | 0.62 | 0.53 |
| A_51_P437697 | NM_011826 | Hax1      | 23897  | HCLS1 associated X-1                                                                       | -1.78 | 0.62 | 0.06 |
| A_52_P680681 | NM_175260 | Myh10     | 77579  | myosin, heavy polypeptide 10, non-muscle                                                   | -1.24 | 0.62 | 0.55 |
| A_51_P212754 | NM_009369 | Tgfb1     | 21810  | transforming growth factor, beta induced                                                   | -1.46 | 0.62 | 0.21 |
| A_51_P424641 | BC022653  | Sirt4     | 75387  | sirtuin 4 (silent mating type information regulation 2 homolog) 4 ( <i>S. cerevisiae</i> ) | -1.34 | 0.62 | 0.37 |
| A_51_P323812 | NM_133661 | Slc6a12   | 14411  | solute carrier family 6 (neurotransmitter transporter, betaine/GABA), member 12            | -1.71 | 0.62 | 0.07 |
| A_51_P268514 | AK135532  | 6820445E2 | 1E+08  | RIKEN cDNA 6820445E23 gene                                                                 | -1.21 | 0.62 | 0.61 |
| A_51_P419111 | NM_021504 | Ngly1     | 59007  | N-glycanase 1                                                                              | -1.40 | 0.62 | 0.28 |
| A_51_P391495 | NM_008893 | Pola2     | 18969  | polymerase (DNA directed), alpha 2                                                         | -1.56 | 0.62 | 0.15 |
| A_51_P189870 | AK129469  | Ears2     | 67417  | glutamyl-tRNA synthetase 2 (mitochondrial)(putative)                                       | -1.54 | 0.62 | 0.16 |
| A_51_P303095 | NM_024477 | Ttc28     | 209683 | tetratricopeptide repeat domain 28                                                         | -1.44 | 0.62 | 0.22 |
| A_51_P125446 | NM_026963 | Lzic      | 69151  | leucine zipper and CTNNBIP1 domain containing                                              | -1.28 | 0.62 | 0.50 |
| A_51_P430383 | NM_025362 | Dnajc30   | 66114  | Dnaj (Hsp40) homolog, subfamily C, member 30                                               | -1.29 | 0.62 | 0.46 |
| A_51_P294445 | NM_019396 | Cyhr1     | 54151  | cysteine and histidine rich 1                                                              | -1.88 | 0.62 | 0.04 |
| A_52_P739682 | AK084329  | NA        | NA     | NA                                                                                         | -1.46 | 0.62 | 0.21 |

|              |           |           |        |                                                                                         |       |      |      |
|--------------|-----------|-----------|--------|-----------------------------------------------------------------------------------------|-------|------|------|
| A_51_P397639 | AK147241  | Trrap     | 100683 | transformation/transcription domain-associated protein                                  | -1.94 | 0.62 | 0.03 |
| A_52_P600750 | NA        | NA        | NA     | NA                                                                                      | -1.43 | 0.62 | 0.24 |
| A_51_P476509 | NM_175537 | Zbtb38    | 245007 | zinc finger and BTB domain containing 38                                                | -1.22 | 0.62 | 0.58 |
| A_52_P526750 | NM_153583 | Atg4d     | 235040 | autophagy-related 4D (yeast)                                                            | -1.98 | 0.62 | 0.03 |
| A_51_P133575 | NM_153775 | Ctu2      | 66965  | cytosolic thiouridylase subunit 2 homolog (S. pombe)                                    | -1.59 | 0.62 | 0.14 |
| A_52_P234695 | XM_896388 | NA        | NA     | NA                                                                                      | -1.58 | 0.62 | 0.15 |
| A_51_P208355 | NM_025676 | Mcm8      | 66634  | minichromosome maintenance deficient 8 (S. cerevisiae)                                  | -1.77 | 0.62 | 0.06 |
| A_51_P367947 | NM_172525 | Arhgap29  | 214137 | Rho GTPase activating protein 29                                                        | -1.20 | 0.61 | 0.61 |
| A_51_P488510 | NM_145221 | Appl1     | 72993  | adaptor protein, phosphotyrosine interaction, PH domain and leucine zipper containing 1 | -1.16 | 0.61 | 0.77 |
| A_51_P419925 | BC058405  | E130112L2 | 268739 | RIKEN cDNA E130112L23 gene                                                              | -1.42 | 0.61 | 0.27 |
| A_52_P532033 | NM_009210 | Hltf      | 20585  | helicase-like transcription factor                                                      | -1.56 | 0.61 | 0.15 |
| A_52_P241732 | NM_145122 | Pex16     | 18633  | peroxisomal biogenesis factor 16                                                        | -1.31 | 0.61 | 0.44 |
| A_52_P541752 | NM_030143 | Ddit4l    | 73284  | DNA-damage-inducible transcript 4-like                                                  | -1.73 | 0.61 | 0.07 |
| A_52_P355197 | NM_010269 | Gdap2     | 14547  | ganglioside-induced differentiation-associated-protein 2                                | -1.18 | 0.61 | 0.67 |
| A_52_P162538 | AK172123  | Chmp6     | 208092 | chromatin modifying protein 6                                                           | -1.60 | 0.61 | 0.14 |
| A_51_P321033 | NM_026366 | N6amt1    | 67768  | N-6 adenine-specific DNA methyltransferase 1 (putative)                                 | -1.26 | 0.61 | 0.53 |
| A_52_P215278 | AK048772  | Ranbp10   | 74334  | RAN binding protein 10                                                                  | -1.48 | 0.61 | 0.20 |
| A_52_P2520   | NM_016916 | Blcap     | 53619  | bladder cancer associated protein homolog (human)                                       | -1.79 | 0.61 | 0.06 |
| A_51_P501757 | BC096024  | Rgmb      | 68799  | RGM domain family, member B                                                             | -1.37 | 0.61 | 0.33 |
| A_51_P246773 | NM_030261 | Sesn3     | 75747  | sestrin 3                                                                               | -1.48 | 0.61 | 0.20 |
| A_51_P342082 | NM_019953 | Cnpy2     | 56530  | canopy 2 homolog (zebrafish)                                                            | -1.83 | 0.61 | 0.04 |
| A_52_P547251 | AK009475  | Zfp560    | 434377 | zinc finger protein 560                                                                 | -1.50 | 0.61 | 0.20 |
| A_51_P442838 | NM_027279 | 2810422O2 | 69962  | RIKEN cDNA 2810422O20 gene                                                              | -1.53 | 0.61 | 0.17 |
| A_52_P612058 | AK031083  | Cdca2     | 108912 | cell division cycle associated 2                                                        | -1.40 | 0.61 | 0.28 |
| A_52_P145011 | NM_001007 | Slc25a42  | 73095  | solute carrier family 25, member 42                                                     | -1.76 | 0.61 | 0.07 |
| A_52_P573400 | NM_010569 | Invs      | 16348  | inversin                                                                                | -1.27 | 0.61 | 0.50 |
| A_51_P310896 | NM_008826 | Pfkl      | 18641  | phosphofructokinase, liver, B-type                                                      | -1.61 | 0.61 | 0.13 |

|              |           |                 |        |                                                         |       |      |      |
|--------------|-----------|-----------------|--------|---------------------------------------------------------|-------|------|------|
|              |           |                 |        | Williams Beuren syndrome chromosome region 27           |       |      |      |
| A_51_P507359 | NM_024479 | Wbscr27         | 79565  | (human)                                                 | -1.53 | 0.61 | 0.17 |
| A_51_P278532 | NM_010922 | Mrpl40          | 18100  | mitochondrial ribosomal protein L40                     | -1.85 | 0.61 | 0.04 |
|              |           |                 |        | oligonucleotide/oligosaccharide-binding fold containing |       |      |      |
| A_51_P499254 | BC095967  | Obfc2a          | 109019 | 2A                                                      | -1.42 | 0.61 | 0.27 |
| A_51_P407074 | NM_025982 | Tspan31         | 67125  | tetraspanin 31                                          | -1.62 | 0.61 | 0.12 |
| A_51_P270364 | NM_133823 | Mmaa            | 109136 | methylmalonic aciduria (cobalamin deficiency) type A    | -1.45 | 0.61 | 0.22 |
|              |           |                 |        | asparagine-linked glycosylation 12 homolog (yeast,      |       |      |      |
| A_51_P245248 | NM_145477 | Alg12           | 223774 | alpha-1,6-mannosyltransferase)                          | -1.21 | 0.61 | 0.61 |
| A_51_P505339 | NM_025596 | Preli1          | 66494  | PRELI domain containing 1                               | -1.65 | 0.61 | 0.11 |
| A_52_P192418 | NM_010175 | Fadd            | 14082  | Fas (TNFRSF6)-associated via death domain               | -1.66 | 0.61 | 0.11 |
| A_52_P571868 | NM_178744 | Zbtb1           | 268564 | zinc finger and BTB domain containing 1                 | -1.48 | 0.61 | 0.20 |
| A_52_P18060  | NM_175937 | Cpeb2           | 231207 | cytoplasmic polyadenylation element binding protein 2   | -1.22 | 0.61 | 0.58 |
| A_52_P323658 | BC094586  | Zfp422-rs1      | 77652  | zinc finger protein 422, related sequence 1             | -1.55 | 0.61 | 0.16 |
| A_52_P341339 | NM_009231 | Sos1            | 20662  | son of sevenless homolog 1 (Drosophila)                 | -1.69 | 0.61 | 0.09 |
| A_51_P312517 | NM_008058 | Fzd8            | 14370  | frizzled homolog 8 (Drosophila)                         | -1.39 | 0.61 | 0.30 |
| A_52_P594355 | NM_028162 | Tbc1d5          | 72238  | TBC1 domain family, member 5                            | -1.84 | 0.61 | 0.04 |
| A_52_P99670  | NM_021435 | Slc35b4         | 58246  | solute carrier family 35, member B4                     | -1.21 | 0.61 | 0.61 |
| A_52_P433828 | NM_026260 | Tctn3           | 67590  | tectonic family member 3                                | -1.66 | 0.61 | 0.11 |
| A_51_P293853 | NM_010271 | Gpd1            | 14555  | glycerol-3-phosphate dehydrogenase 1 (soluble)          | -1.40 | 0.61 | 0.28 |
| A_51_P106294 | NM_010292 | Gck             | 103988 | glucokinase                                             | -1.31 | 0.61 | 0.44 |
| A_51_P110689 | NM_009104 | Rrm2            | 20135  | ribonucleotide reductase M2                             | -1.27 | 0.61 | 0.50 |
|              |           |                 |        | cat eye syndrome chromosome region, candidate 5         |       |      |      |
| A_52_P565279 | NM_144815 | Cecr5           | 214932 | homolog (human)                                         | -1.33 | 0.61 | 0.37 |
| A_51_P111757 | NM_001039 | Asb1            | 65247  | ankyrin repeat and SOCS box-containing 1                | -1.52 | 0.61 | 0.17 |
| A_51_P328539 | NM_007933 | Eno3            | 13808  | enolase 3, beta muscle                                  | -1.60 | 0.61 | 0.14 |
| A_52_P395544 | NA        | NA              | NA     | NA                                                      | -1.48 | 0.61 | 0.20 |
| A_51_P474643 | NM_010655 | Kpna2           | 16647  | karyopherin (importin) alpha 2                          | -1.65 | 0.61 | 0.11 |
| A_51_P195982 | AK032712  | Strn            | 268980 | striatin, calmodulin binding protein                    | -1.49 | 0.61 | 0.20 |
| A_52_P617838 | NM_175463 | A930012O:227923 |        | RIKEN cDNA A930012O16 gene                              | -1.54 | 0.61 | 0.16 |
| A_51_P382970 | NM_133721 | Itga9           | 104099 | integrin alpha 9                                        | -1.20 | 0.61 | 0.61 |
| A_52_P538117 | XM_988017 | Chadl           | 214685 | chondroadherin-like                                     | -1.25 | 0.61 | 0.53 |

|              |           |                 |        |                                                                                                                                                         |       |      |      |
|--------------|-----------|-----------------|--------|---------------------------------------------------------------------------------------------------------------------------------------------------------|-------|------|------|
| A_52_P592951 | NM_025509 | Ostc            | 66357  | oligosaccharyltransferase complex subunit                                                                                                               | -1.34 | 0.61 | 0.37 |
| A_51_P113003 | NM_031863 | Cenpq           | 83815  | centromere protein Q                                                                                                                                    | -1.75 | 0.61 | 0.07 |
| A_52_P469249 | NA        | NA              | NA     | NA                                                                                                                                                      | -1.27 | 0.61 | 0.50 |
| A_52_P409578 | NM_178045 | Rassf4          | 213391 | Ras association (RalGDS/AF-6) domain family member 4                                                                                                    | -1.76 | 0.61 | 0.07 |
| A_52_P397401 | NM_173036 | Gpr97           | 54672  | G protein-coupled receptor 97<br>pre-B-cell leukemia transcription factor interacting                                                                   | -1.59 | 0.61 | 0.14 |
| A_51_P146850 | NM_146131 | Pbxip1          | 229534 | protein 1                                                                                                                                               | -1.42 | 0.61 | 0.27 |
| A_51_P202596 | NM_172628 | Sh3tc2          | 225608 | SH3 domain and tetratricopeptide repeats 2                                                                                                              | -1.45 | 0.61 | 0.22 |
| A_51_P363275 | NA        | NA              | NA     | NA                                                                                                                                                      | -1.25 | 0.61 | 0.53 |
| A_51_P282947 | NM_011303 | Dhrs3           | 20148  | dehydrogenase/reductase (SDR family) member 3<br>methylenetetrahydrofolate dehydrogenase (NADP+<br>dependent), methenyltetrahydrofolate cyclohydrolase, | -1.32 | 0.61 | 0.40 |
| A_51_P392928 | NM_138745 | Mthfd1          | 108156 | formyltetrahydrofolate synthase                                                                                                                         | -1.31 | 0.61 | 0.44 |
| A_51_P425632 | NM_025649 | Mad2l1bp        | 66591  | MAD2L1 binding protein                                                                                                                                  | -1.38 | 0.61 | 0.30 |
| A_51_P488910 | NM_001042 | 483142619       | 212073 | RIKEN cDNA 483142619 gene                                                                                                                               | -1.56 | 0.61 | 0.15 |
| A_51_P172542 | NM_009207 | Slc4a2          | 20535  | solute carrier family 4 (anion exchanger), member 2                                                                                                     | -1.39 | 0.61 | 0.28 |
| A_51_P366244 | AK018143  | Cgn             | 70737  | cingulin                                                                                                                                                | -1.75 | 0.61 | 0.07 |
| A_51_P368804 | NM_023472 | Ankra2          | 68558  | ankyrin repeat, family A (RFXANK-like), 2<br>glycerophosphodiester phosphodiesterase domain                                                             | -1.88 | 0.61 | 0.04 |
| A_51_P468464 | NM_201352 | Gdpd5           | 233552 | containing 5                                                                                                                                            | -1.54 | 0.61 | 0.16 |
| A_51_P453246 | BC029863  | AI462493        | 107197 | expressed sequence AI462493<br>N(alpha)-acetyltransferase 40, NatD catalytic subunit,                                                                   | -1.48 | 0.61 | 0.20 |
| A_52_P684579 | AK035418  | Naa40           | 70999  | homolog ( <i>S. cerevisiae</i> )                                                                                                                        | -1.08 | 0.61 | 1.04 |
| A_52_P38659  | NM_029992 | Tchp            | 77832  | trichoplein, keratin filament binding                                                                                                                   | -1.45 | 0.61 | 0.22 |
| A_52_P290152 | BC066100  | 6720401G1103012 |        | RIKEN cDNA 6720401G13 gene                                                                                                                              | -1.53 | 0.61 | 0.17 |
| A_51_P336691 | NM_025573 | Sfrs9           | 108014 | splicing factor, arginine/serine rich 9                                                                                                                 | -1.45 | 0.61 | 0.22 |
| A_51_P509140 | NM_170760 | U2af1l4         | 233073 | U2 small nuclear RNA auxiliary factor 1-like 4                                                                                                          | -1.75 | 0.61 | 0.07 |
| A_52_P338887 | NM_178761 | Zfp672          | 319475 | zinc finger protein 672                                                                                                                                 | -1.27 | 0.61 | 0.50 |
| A_52_P517470 | NA        | NA              | NA     | NA                                                                                                                                                      | -1.44 | 0.61 | 0.24 |
| A_51_P276766 | NM_007416 | Adra1b          | 11548  | adrenergic receptor, alpha 1b                                                                                                                           | -1.59 | 0.61 | 0.14 |
| A_51_P349922 | AK081838  | C130081A197550  |        | RIKEN cDNA C130081A10 gene                                                                                                                              | -1.43 | 0.61 | 0.24 |

|              |           |                |        |                                                            |       |      |      |
|--------------|-----------|----------------|--------|------------------------------------------------------------|-------|------|------|
| A_52_P401640 | NM_007563 | Bpgm           | 12183  | 2,3-bisphosphoglycerate mutase                             | -1.57 | 0.61 | 0.15 |
| A_51_P308017 | NM_172149 | Bnip1          | 224630 | BCL2/adenovirus E1B interacting protein 1                  | -1.63 | 0.61 | 0.11 |
| A_51_P350513 | NM_009668 | Bin1           | 30948  | bridging integrator 1                                      | -1.67 | 0.61 | 0.10 |
| A_52_P222709 | NM_001004 | Pigu           | 228812 | phosphatidylinositol glycan anchor biosynthesis, class U   | -1.94 | 0.61 | 0.03 |
| A_51_P267986 | NM_145951 | Enox2          | 209224 | ecto-NOX disulfide-thiol exchanger 2                       | -1.49 | 0.61 | 0.20 |
| A_51_P277524 | NM_017476 | Akap8l         | 54194  | A kinase (PRKA) anchor protein 8-like                      | -1.66 | 0.61 | 0.11 |
| A_51_P462837 | AK078248  | NA             | NA     | NA                                                         | -1.86 | 0.61 | 0.04 |
| A_51_P284565 | NM_133706 | Tmem97         | 69071  | transmembrane protein 97                                   | -1.45 | 0.61 | 0.22 |
| A_51_P477779 | NM_013646 | Rora           | 19883  | RAR-related orphan receptor alpha                          | -1.30 | 0.61 | 0.44 |
| A_51_P369550 | NM_013489 | Cd84           | 12523  | CD84 antigen                                               | -1.56 | 0.61 | 0.15 |
| A_51_P518893 | NM_001002 | Ccin           | 442829 | calicin                                                    | -1.46 | 0.61 | 0.21 |
| A_51_P516994 | NM_027886 | Stk11ip        | 71728  | serine/threonine kinase 11 interacting protein             | -1.88 | 0.61 | 0.04 |
| A_51_P371745 | NM_134248 | Havcr1         | 171283 | hepatitis A virus cellular receptor 1                      | -1.13 | 0.61 | 0.86 |
| A_51_P404825 | NM_198645 | Ccdc58         | 381045 | coiled-coil domain containing 58                           | -1.52 | 0.61 | 0.18 |
| A_51_P156363 | BC078642  | Hnrnpul1       | 232989 | heterogeneous nuclear ribonucleoprotein U-like 1           | -1.46 | 0.61 | 0.21 |
| A_51_P520927 | NM_028771 | Ccdc97         | 52132  | coiled-coil domain containing 97                           | -1.32 | 0.61 | 0.40 |
| A_51_P383741 | NM_007554 | Bmp4           | 12159  | bone morphogenetic protein 4                               | -1.38 | 0.61 | 0.30 |
| A_51_P175229 | NM_001033 | Fbxl18         | 231863 | F-box and leucine-rich repeat protein 18                   | -1.66 | 0.61 | 0.11 |
| A_51_P190697 | NM_025369 | Mrps36         | 66128  | mitochondrial ribosomal protein S36                        | -1.54 | 0.61 | 0.16 |
| A_51_P154840 | XM_001000 | 1700080G173533 |        | RIKEN cDNA 1700080G18 gene                                 | -1.66 | 0.61 | 0.11 |
| A_51_P291764 | NA        | NA             | NA     | NA                                                         | -1.10 | 0.61 | 0.91 |
| A_51_P164425 | NM_025440 | Mrps16         | 66242  | mitochondrial ribosomal protein S16                        | -1.78 | 0.61 | 0.06 |
| A_52_P387237 | NM_011303 | Dhrs3          | 20148  | dehydrogenase/reductase (SDR family) member 3              | -1.28 | 0.61 | 0.50 |
| A_52_P459538 | AK037967  | Mkln1          | 27418  | muskelin 1, intracellular mediator containing kelch motifs | -1.48 | 0.61 | 0.20 |
| A_52_P556082 | AK046928  | Trmt2b         | 215201 | TRM2 tRNA methyltransferase 2 homolog B (S. cerevisiae)    | -1.44 | 0.61 | 0.22 |
| A_52_P372151 | NM_018761 | Ctnnal1        | 54366  | catenin (cadherin associated protein), alpha-like 1        | -1.53 | 0.61 | 0.17 |
| A_51_P440936 | NM_013581 | Cog1           | 16834  | component of oligomeric golgi complex 1                    | -1.74 | 0.61 | 0.07 |
| A_51_P452382 | NM_009284 | Stat6          | 20852  | signal transducer and activator of transcription 6         | -1.48 | 0.61 | 0.20 |

|              |           |                |        |                                                                                                           |       |      |      |
|--------------|-----------|----------------|--------|-----------------------------------------------------------------------------------------------------------|-------|------|------|
| A_52_P584154 | NM_027288 | Manba          | 110173 | mannosidase, beta A, lysosomal                                                                            | -1.24 | 0.61 | 0.55 |
| A_51_P242603 | NA        | NA             | NA     | NA                                                                                                        | -1.62 | 0.61 | 0.13 |
| A_52_P580458 | NM_145596 | Gatad2a        | 234366 | GATA zinc finger domain containing 2A                                                                     | -1.40 | 0.61 | 0.28 |
| A_51_P428142 | NM_177681 | Zfp12          | 231866 | zinc finger protein 12                                                                                    | -1.48 | 0.61 | 0.20 |
| A_52_P140881 | NM_177615 | Slc26a10       | 216441 | solute carrier family 26, member 10                                                                       | -1.21 | 0.61 | 0.61 |
| A_51_P181451 | NM_007572 | C1qa           | 12259  | complement component 1, q subcomponent, alpha polypeptide                                                 | -1.37 | 0.61 | 0.33 |
| A_52_P509188 | AK129437  | Fto            | 26383  | fat mass and obesity associated                                                                           | -1.32 | 0.61 | 0.40 |
| A_51_P207570 | NM_030064 | Phf23          | 78246  | PHD finger protein 23                                                                                     | -1.53 | 0.61 | 0.17 |
| A_51_P346862 | NM_018854 | lft20          | 55978  | intraflagellar transport 20 homolog (Chlamydomonas)                                                       | -1.39 | 0.61 | 0.28 |
| A_52_P484975 | NM_145760 | Arfgap1        | 228998 | ADP-ribosylation factor GTPase activating protein 1                                                       | -1.18 | 0.61 | 0.67 |
| A_51_P462692 | NM_001077 | Ptbp1          | 19205  | polypyrimidine tract binding protein 1                                                                    | -1.98 | 0.61 | 0.03 |
| A_51_P140751 | NM_011397 | Slc23a1        | 20522  | solute carrier family 23 (nucleobase transporters), member 1                                              | -1.49 | 0.61 | 0.20 |
| A_51_P145020 | NM_146245 | Lrit1          | 239037 | leucine-rich repeat, immunoglobulin-like and transmembrane domains 1                                      | -1.23 | 0.61 | 0.55 |
| A_52_P519538 | NM_172712 | Uba6           | 231380 | ubiquitin-like modifier activating enzyme 6                                                               | -1.56 | 0.61 | 0.15 |
| A_51_P238933 | NM_010948 | Nudc           | 18221  | nuclear distribution gene C homolog (Aspergillus)                                                         | -1.53 | 0.61 | 0.17 |
| A_52_P235557 | NM_023472 | Ankra2         | 68558  | ankyrin repeat, family A (RFXANK-like), 2                                                                 | -1.27 | 0.61 | 0.50 |
| A_51_P278893 | NM_001077 | Hdac5          | 15184  | histone deacetylase 5                                                                                     | -1.52 | 0.61 | 0.17 |
| A_52_P421196 | NM_026010 | Lipt2          | 67164  | lipoyl(octanoyl) transferase 2 (putative)                                                                 | -1.34 | 0.61 | 0.37 |
| A_51_P330090 | NM_180662 | Trappc9        | 76510  | trafficking protein particle complex 9                                                                    | -1.62 | 0.61 | 0.12 |
| A_52_P467726 | NM_010942 | Nsg1           | 18196  | neuron specific gene family member 1                                                                      | -1.29 | 0.61 | 0.46 |
| A_52_P665833 | NM_001039 | Pofut1         | 140484 | protein O-fucosyltransferase 1                                                                            | -1.67 | 0.61 | 0.10 |
| A_51_P316311 | XM_129443 | Ppfia4         | 68507  | protein tyrosine phosphatase, receptor type, f polypeptide (PTPRF), interacting protein (liprin), alpha 4 | -1.90 | 0.61 | 0.04 |
| A_51_P105927 | NM_001033 | Rasl12         | 70784  | RAS-like, family 12                                                                                       | -1.27 | 0.61 | 0.50 |
| A_51_P170725 | NM_028788 | 1300002K074152 |        | RIKEN cDNA 1300002K09 gene                                                                                | -1.57 | 0.61 | 0.15 |
| A_52_P614453 | AK017289  | 5430410E071413 |        | RIKEN cDNA 5430410E06 gene                                                                                | -1.77 | 0.61 | 0.07 |
| A_52_P263022 | NM_198296 | 9130011E171617 |        | RIKEN cDNA 9130011E15 gene                                                                                | -1.76 | 0.61 | 0.07 |

|               |           |            |        |                                                                                           |       |      |      |
|---------------|-----------|------------|--------|-------------------------------------------------------------------------------------------|-------|------|------|
| A_52_P153939  | AK077774  | Cbl        | 12402  | Casitas B-lineage lymphoma                                                                | -1.15 | 0.61 | 0.77 |
| A_51_P330213  | NM_024184 | Asf1b      | 66929  | ASF1 anti-silencing function 1 homolog B ( <i>S. cerevisiae</i> )                         | -1.58 | 0.61 | 0.15 |
| A_52_P594917  | NM_054097 | Pip4k2c    | 117150 | phosphatidylinositol-5-phosphate 4-kinase, type II, gamma                                 | -1.80 | 0.61 | 0.06 |
| A_52_P387124  | NM_178732 | Zfp324     | 243834 | zinc finger protein 324                                                                   | -1.30 | 0.61 | 0.44 |
| A_51_P355906  | NM_021099 | Kit        | 16590  | kit oncogene                                                                              | -1.24 | 0.61 | 0.55 |
| A_51_P213246  | NM_181278 | B230219D2  | 78521  | RIKEN cDNA B230219D22 gene                                                                | -1.64 | 0.61 | 0.11 |
| A_52_P500622  | NM_026622 | 3110057O12 | 269423 | RIKEN cDNA 3110057O12 gene                                                                | -1.55 | 0.61 | 0.16 |
| A_52_P81210   | NM_007868 | Dmd        | 13405  | dystrophin, muscular dystrophy proteasome (prosome, macropain) assembly chaperone         | -1.14 | 0.61 | 0.82 |
| A_51_P338515  | NM_134138 | Psmg2      | 107047 | 2                                                                                         | -1.59 | 0.61 | 0.14 |
| A_52_P92404   | NA        | NA         | NA     | NA                                                                                        | -1.35 | 0.61 | 0.34 |
| A_52_P1140098 | AK038241  | Gm10914    | 1E+08  | predicted gene 10914                                                                      | -1.42 | 0.61 | 0.27 |
| A_51_P141953  | BC034876  | 1110008L1  | 66132  | RIKEN cDNA 1110008L16 gene                                                                | -1.26 | 0.61 | 0.53 |
| A_52_P292826  | AK040524  | Gns        | 75612  | glucosamine (N-acetyl)-6-sulfatase                                                        | -1.77 | 0.61 | 0.06 |
| A_52_P852754  | NA        | NA         | NA     | NA                                                                                        | -1.30 | 0.61 | 0.44 |
| A_52_P161087  | NM_001004 | 2610008E1  | 72128  | RIKEN cDNA 2610008E11 gene                                                                | -1.59 | 0.61 | 0.14 |
| A_52_P534150  | NM_138303 | Yipf2      | 74766  | Yip1 domain family, member 2                                                              | -1.11 | 0.61 | 0.91 |
| A_51_P295558  | NM_026421 | Enoph1     | 67870  | enolase-phosphatase 1                                                                     | -1.85 | 0.61 | 0.04 |
| A_51_P249009  | NM_030714 | Dtx3       | 80904  | deltex 3 homolog ( <i>Drosophila</i> )                                                    | -1.59 | 0.61 | 0.14 |
| A_52_P523569  | NM_053014 | Agpat3     | 28169  | 1-acylglycerol-3-phosphate O-acyltransferase 3                                            | -1.22 | 0.61 | 0.58 |
| A_51_P219291  | NM_172410 | Nup93      | 71805  | nucleoporin 93                                                                            | -1.43 | 0.61 | 0.24 |
| A_51_P435348  | NM_145586 | Tmem159    | 233806 | transmembrane protein 159                                                                 | -1.52 | 0.61 | 0.18 |
| A_51_P353095  | NM_177319 | Zfyve27    | 319740 | zinc finger, FYVE domain containing 27                                                    | -1.68 | 0.61 | 0.10 |
| A_51_P158072  | NA        | NA         | NA     | NA                                                                                        | -1.67 | 0.61 | 0.10 |
| A_51_P102081  | NM_007847 | Defa-rs2   | 13222  | defensin, alpha, related sequence 2                                                       | -1.35 | 0.61 | 0.34 |
| A_52_P239752  | AK077971  | Ttc39c     | 72747  | tetratricopeptide repeat domain 39C                                                       | -1.50 | 0.61 | 0.20 |
| A_52_P505053  | BC057112  | Dhx29      | 218629 | DEAH (Asp-Glu-Ala-His) box polypeptide 29                                                 | -1.57 | 0.61 | 0.15 |
| A_51_P148717  | NM_175431 | A830093I2  | 207921 | RIKEN cDNA A830093I24 gene                                                                | -1.71 | 0.61 | 0.07 |
| A_52_P323182  | NA        | NA         | NA     | NA                                                                                        | -1.26 | 0.61 | 0.53 |
| A_51_P253204  | NM_028805 | Katnb1     | 74187  | katanin p80 (WD40-containing) subunit B 1 transducin-like enhancer of split 6, homolog of | -1.51 | 0.61 | 0.18 |
| A_51_P368591  | NM_053254 | Tle6       | 114606 | <i>Drosophila</i> E(spl)                                                                  | -1.38 | 0.61 | 0.30 |



|              |           |           |        |                                                                                                           |       |      |      |
|--------------|-----------|-----------|--------|-----------------------------------------------------------------------------------------------------------|-------|------|------|
| A_52_P392121 | NM_028763 | Cbx6      | 494448 | chromobox homolog 6                                                                                       | -1.62 | 0.61 | 0.12 |
| A_51_P180974 | NM_028444 | Prkcdpb   | 109042 | protein kinase C, delta binding protein                                                                   | -1.23 | 0.61 | 0.58 |
| A_51_P368151 | NA        | NA        | NA     | NA                                                                                                        | -1.70 | 0.61 | 0.09 |
| A_52_P71261  | NA        | NA        | NA     | NA                                                                                                        | -1.51 | 0.61 | 0.20 |
| A_52_P602091 | NM_001037 | Csf1r     | 12978  | colony stimulating factor 1 receptor                                                                      | -1.42 | 0.61 | 0.27 |
| A_52_P498355 | NM_201358 | Lym4      | 380840 | LYR motif containing 4                                                                                    | -1.52 | 0.61 | 0.17 |
| A_51_P433824 | NM_009415 | Tpi1      | 21991  | triosephosphate isomerase 1                                                                               | -1.39 | 0.61 | 0.30 |
| A_52_P413280 | NM_028493 | Rhobtb3   | 73296  | Rho-related BTB domain containing 3                                                                       | -1.49 | 0.61 | 0.20 |
| A_51_P282673 | NM_175098 | Ccdc126   | 57895  | coiled-coil domain containing 126                                                                         | -1.31 | 0.61 | 0.44 |
| A_51_P314418 | NM_007550 | Blm       | 12144  | Bloom syndrome homolog (human)                                                                            | -1.36 | 0.61 | 0.34 |
| A_51_P246339 | NM_028128 | Rfc5      | 72151  | replication factor C (activator 1) 5                                                                      | -1.82 | 0.61 | 0.05 |
| A_51_P136650 | NM_032460 | Bat4      | 81845  | HLA-B associated transcript 4                                                                             | -1.88 | 0.60 | 0.04 |
| A_52_P199614 | AK155186  | Wdfy4     | 545030 | WD repeat and FYVE domain containing 4                                                                    | -1.57 | 0.60 | 0.15 |
| A_52_P355992 | BC094367  | Zfp60     | 22718  | zinc finger protein 60                                                                                    | -1.85 | 0.60 | 0.04 |
| A_51_P223961 | NM_153160 | Zcchc17   | 619605 | zinc finger, CCHC domain containing 17                                                                    | -1.29 | 0.60 | 0.46 |
| A_52_P435670 | NM_213733 | Npepl1    | 228961 | aminopeptidase-like 1                                                                                     | -1.59 | 0.60 | 0.14 |
| A_52_P960434 | NA        | NA        | NA     | NA                                                                                                        | -1.78 | 0.60 | 0.06 |
| A_51_P381763 | Z14986    | Amd1      | 11702  | S-adenosylmethionine decarboxylase 1                                                                      | -1.67 | 0.60 | 0.10 |
| A_51_P428873 | NM_001042 | Gm9897    | 208595 | predicted gene 9897                                                                                       | -1.53 | 0.60 | 0.17 |
| A_51_P423762 | NM_175211 | Ralgps1   | 241308 | Ral GEF with PH domain and SH3 binding motif 1<br>oligonucleotide/oligosaccharide-binding fold containing | -1.57 | 0.60 | 0.15 |
| A_51_P294883 | NM_027257 | Obfc2b    | 69917  | 2B                                                                                                        | -1.40 | 0.60 | 0.28 |
| A_51_P329283 | AK078133  | Senp5     | 320213 | SUMO/sentrin specific peptidase 5                                                                         | -1.61 | 0.60 | 0.13 |
| A_51_P400498 | BC079668  | Whsc1     | 107823 | Wolf-Hirschhorn syndrome candidate 1 (human)                                                              | -1.73 | 0.60 | 0.07 |
| A_52_P141404 | NM_144814 | Rcor3     | 214742 | REST corepressor 3                                                                                        | -1.65 | 0.60 | 0.11 |
| A_52_P481686 | NM_207212 | Wtip      | 101543 | WT1-interacting protein                                                                                   | -1.11 | 0.60 | 0.91 |
| A_51_P472751 | NM_007915 | Ei24      | 13663  | etoposide induced 2.4 mRNA                                                                                | -1.26 | 0.60 | 0.53 |
| A_51_P468770 | NM_024273 | 4930455C2 | 76916  | RIKEN cDNA 4930455C21 gene                                                                                | -1.24 | 0.60 | 0.55 |
| A_51_P445912 | AK009882  | 2310047K2 | 71928  | RIKEN cDNA 2310047K21 gene                                                                                | -1.99 | 0.60 | 0.03 |
| A_51_P295708 | NM_026748 | Ints1     | 68510  | integrator complex subunit 1                                                                              | -1.74 | 0.60 | 0.07 |
| A_51_P437883 | NM_145819 | Mzf1      | 109889 | myeloid zinc finger 1                                                                                     | -2.09 | 0.60 | 0.02 |
| A_52_P353322 | NM_133973 | Cog4      | 102339 | component of oligomeric golgi complex 4                                                                   | -1.58 | 0.60 | 0.15 |
| A_52_P569794 | XM_893274 | NA        | NA     | NA                                                                                                        | -1.78 | 0.60 | 0.06 |
| A_52_P567890 | NM_023750 | Zfp84     | 74352  | zinc finger protein 84                                                                                    | -1.34 | 0.60 | 0.37 |

|              |           |           |        |                                                                                                   |       |      |      |
|--------------|-----------|-----------|--------|---------------------------------------------------------------------------------------------------|-------|------|------|
| A_51_P427425 | NM_144793 | Slc25a38  | 208638 | solute carrier family 25, member 38                                                               | -1.15 | 0.60 | 0.77 |
| A_52_P350537 | NM_181409 | Mtmt11    | 194126 | myotubularin related protein 11                                                                   | -1.49 | 0.60 | 0.20 |
| A_52_P574199 | NM_028170 | 1700030K0 | 72254  | RIKEN cDNA 1700030K09 gene                                                                        | -1.60 | 0.60 | 0.14 |
| A_51_P152550 | NM_178378 | lqcg      | 69707  | IQ motif containing G<br>a disintegrin and metallopeptidase domain 15                             | -1.39 | 0.60 | 0.30 |
| A_51_P291815 | NM_001037 | Adam15    | 11490  | (metargidin)                                                                                      | -1.47 | 0.60 | 0.20 |
| A_51_P396284 | BC030435  | Chd3      | 216848 | chromodomain helicase DNA binding protein 3                                                       | -1.52 | 0.60 | 0.18 |
| A_52_P342131 | NM_207255 | Zfp532    | 328977 | zinc finger protein 532                                                                           | -1.72 | 0.60 | 0.07 |
| A_51_P360508 | NM_144801 | Tmem143   | 70209  | transmembrane protein 143                                                                         | -1.61 | 0.60 | 0.13 |
| A_51_P225427 | NM_026163 | Pkp2      | 67451  | plakophilin 2                                                                                     | -1.51 | 0.60 | 0.20 |
| A_51_P344376 | NM_013533 | Gpr162    | 14788  | G protein-coupled receptor 162                                                                    | -1.41 | 0.60 | 0.27 |
| A_52_P334744 | AB078345  | Agap3     | 213990 | ArfGAP with GTPase domain, ankyrin repeat and PH<br>domain 3                                      | -1.77 | 0.60 | 0.07 |
| A_51_P226567 | NM_153193 | Hsd3b2    | 15493  | hydroxy-delta-5-steroid dehydrogenase, 3 beta- and<br>steroid delta-isomerase 2                   | -1.44 | 0.60 | 0.22 |
| A_52_P123738 | AK031657  | Rnf41     | 67588  | ring finger protein 41                                                                            | -1.50 | 0.60 | 0.20 |
| A_52_P22286  | AK041357  | Bcl2l12   | 75736  | BCL2-like 12 (proline rich)                                                                       | -1.41 | 0.60 | 0.27 |
| A_51_P237834 | AK173022  | Tmcc1     | 330401 | transmembrane and coiled coil domains 1                                                           | -1.57 | 0.60 | 0.15 |
| A_51_P372522 | NM_001014 | Fam189b   | 68521  | family with sequence similarity 189, member B                                                     | -1.80 | 0.60 | 0.05 |
| A_51_P400463 | XM_980293 | NA        | NA     | NA                                                                                                | -1.70 | 0.60 | 0.09 |
| A_52_P681269 | NM_015782 | Snrpa     | 53607  | small nuclear ribonucleoprotein polypeptide A                                                     | -1.63 | 0.60 | 0.11 |
| A_52_P561650 | NM_147776 | Vwa1      | 246228 | von Willebrand factor A domain containing 1                                                       | -1.73 | 0.60 | 0.07 |
| A_52_P560628 | AK005305  | 1300002E1 | 1E+08  | RIKEN cDNA 1300002E11 gene                                                                        | -1.46 | 0.60 | 0.21 |
| A_51_P470205 | AK018460  | Mobkl2b   | 214944 | MOB1, Mps One Binder kinase activator-like 2B (yeast)                                             | -1.32 | 0.60 | 0.40 |
| A_51_P462546 | NM_133708 | Gmppa     | 69080  | GDP-mannose pyrophosphorylase A                                                                   | -1.30 | 0.60 | 0.44 |
| A_52_P227307 | NM_022328 | Mllt1     | 64144  | myeloid/lymphoid or mixed-lineage leukemia (trithorax<br>homolog, Drosophila); translocated to, 1 | -1.67 | 0.60 | 0.10 |
| A_52_P148883 | NM_011213 | Ptprf     | 19268  | protein tyrosine phosphatase, receptor type, F                                                    | -1.88 | 0.60 | 0.04 |
| A_52_P653303 | NA        | NA        | NA     | NA                                                                                                | -1.13 | 0.60 | 0.82 |
| A_52_P269057 | AK042006  | Elp4      | 77766  | elongation protein 4 homolog (S. cerevisiae)                                                      | -1.56 | 0.60 | 0.15 |

|               |           |           |        |                                                                                                           |       |      |      |
|---------------|-----------|-----------|--------|-----------------------------------------------------------------------------------------------------------|-------|------|------|
|               |           |           |        | v-erb-b2 erythroblastic leukemia viral oncogene homolog 2, neuro/glioblastoma derived oncogene            |       |      |      |
| A_52_P49250   | NM_001003 | ErbB2     | 13866  | homolog (avian)                                                                                           | -1.70 | 0.60 | 0.09 |
| A_51_P176517  | NM_170592 | Mettl11a  | 66617  | methyltransferase like 11A                                                                                | -1.81 | 0.60 | 0.05 |
| A_51_P235594  | NM_023045 | Xpo7      | 65246  | exportin 7                                                                                                | -1.73 | 0.60 | 0.07 |
| A_51_P359454  | NM_030561 | BC004004  | 80748  | cDNA sequence BC004004                                                                                    | -1.45 | 0.60 | 0.22 |
| A_51_P171200  | NM_027307 | Golm1     | 105348 | golgi membrane protein 1                                                                                  | -1.19 | 0.60 | 0.67 |
| A_52_P251615  | NM_198249 | E130112L2 | 268739 | RIKEN cDNA E130112L23 gene                                                                                | -1.37 | 0.60 | 0.33 |
| A_52_P1002614 | AK011948  | NA        | NA     | NA                                                                                                        | -1.85 | 0.60 | 0.04 |
| A_51_P417477  | NM_010241 | Aktip     | 14339  | thymoma viral proto-oncogene 1 interacting protein                                                        | -1.82 | 0.60 | 0.05 |
| A_51_P249348  | NM_153125 | Sec16a    | 227648 | SEC16 homolog A ( <i>S. cerevisiae</i> )                                                                  | -1.18 | 0.60 | 0.70 |
| A_52_P456490  | BG087313  | NA        | NA     | NA                                                                                                        | -1.49 | 0.60 | 0.20 |
| A_51_P191354  | NA        | NA        | NA     | NA                                                                                                        | -1.61 | 0.60 | 0.13 |
| A_52_P296281  | NM_015782 | Snrpa     | 53607  | small nuclear ribonucleoprotein polypeptide A                                                             | -1.73 | 0.60 | 0.07 |
| A_52_P586141  | NM_001037 | Adcy7     | 11513  | adenylate cyclase 7                                                                                       | -1.53 | 0.60 | 0.17 |
| A_51_P474509  | NM_026123 | Unc50     | 67387  | unc-50 homolog ( <i>C. elegans</i> )                                                                      | -1.32 | 0.60 | 0.40 |
| A_51_P205737  | NM_016666 | Aip       | 11632  | aryl-hydrocarbon receptor-interacting protein                                                             | -1.54 | 0.60 | 0.16 |
| A_51_P288447  | NM_172288 | Nup133    | 234865 | nucleoporin 133                                                                                           | -1.78 | 0.60 | 0.06 |
| A_51_P111210  | NM_133786 | Smc4      | 70099  | structural maintenance of chromosomes 4                                                                   | -1.33 | 0.60 | 0.37 |
| A_52_P1179483 | AK015079  | 4930404H1 | 73815  | RIKEN cDNA 4930404H11 gene                                                                                | -1.60 | 0.60 | 0.14 |
| A_51_P189104  | NM_008903 | Ppap2a    | 19012  | phosphatidic acid phosphatase type 2A                                                                     | -1.52 | 0.60 | 0.18 |
| A_52_P169028  | NM_026382 | Snrnp48   | 67797  | small nuclear ribonucleoprotein 48 (U11/U12)                                                              | -1.74 | 0.60 | 0.07 |
| A_51_P171965  | NM_026503 | 1110058L1 | 68002  | RIKEN cDNA 1110058L19 gene                                                                                | -1.65 | 0.60 | 0.11 |
| A_51_P116813  | NM_007809 | Cyp17a1   | 13074  | cytochrome P450, family 17, subfamily a, polypeptide 1 serine (or cysteine) peptidase inhibitor, clade F, | -1.64 | 0.60 | 0.11 |
| A_51_P174176  | NM_008878 | Serpinf2  | 18816  | member 2                                                                                                  | -1.79 | 0.60 | 0.06 |
| A_52_P485573  | NM_153484 | Tef       | 21685  | thyrotroph embryonic factor                                                                               | -1.50 | 0.60 | 0.20 |
| A_51_P126476  | NM_010863 | Myo1b     | 17912  | myosin IB                                                                                                 | -1.46 | 0.60 | 0.22 |
| A_52_P165679  | NM_021454 | Cdc42ep5  | 58804  | CDC42 effector protein (Rho GTPase binding) 5                                                             | -1.47 | 0.60 | 0.21 |
| A_51_P400543  | NM_019467 | Aif1      | 11629  | allograft inflammatory factor 1                                                                           | -1.21 | 0.60 | 0.61 |
| A_52_P228389  | AK039222  | Hmg20a    | 66867  | high mobility group 20A                                                                                   | -1.81 | 0.60 | 0.05 |
| A_52_P507277  | NM_025789 | Rsph3a    | 66832  | radial spoke 3A homolog ( <i>Chlamydomonas</i> )                                                          | -1.50 | 0.60 | 0.20 |

|              |           |                |        |                                                             |       |      |      |
|--------------|-----------|----------------|--------|-------------------------------------------------------------|-------|------|------|
| A_52_P483885 | AK078465  | 4930455C276916 |        | RIKEN cDNA 4930455C21 gene                                  | -1.32 | 0.60 | 0.40 |
| A_52_P390241 | NM_001008 | Daam2          | 76441  | dishevelled associated activator of morphogenesis 2         | -1.65 | 0.60 | 0.11 |
| A_52_P350022 | BI659524  | NA             | NA     | NA                                                          | -2.05 | 0.60 | 0.02 |
| A_51_P451482 | NM_023628 | Anxa9          | 71790  | annexin A9                                                  | -1.75 | 0.60 | 0.07 |
| A_52_P505584 | NM_207219 | AI314976       | 106821 | expressed sequence AI314976                                 | -1.75 | 0.60 | 0.07 |
| A_52_P164017 | NM_019575 | Scamp4         | 56214  | secretory carrier membrane protein 4                        | -1.47 | 0.60 | 0.21 |
| A_52_P201446 | NM_133767 | Mtif2          | 76784  | mitochondrial translational initiation factor 2             | -1.54 | 0.60 | 0.17 |
| A_52_P87892  | NM_198017 | Fam175b        | 109359 | family with sequence similarity 175, member B               | -1.31 | 0.60 | 0.44 |
| A_52_P962404 | AK017417  | 5430440L1      | 71384  | RIKEN cDNA 5430440L12 gene                                  | -1.14 | 0.60 | 0.82 |
| A_52_P609778 | NM_011844 | Mgll           | 23945  | monoglyceride lipase                                        | -1.48 | 0.60 | 0.20 |
| A_51_P112557 | NM_009085 | Polr1c         | 20016  | polymerase (RNA) I polypeptide C                            | -1.13 | 0.60 | 0.86 |
| A_51_P404204 | NM_029780 | Raf1           | 110157 | v-raf-leukemia viral oncogene 1                             | -1.97 | 0.60 | 0.03 |
| A_51_P267388 | NM_033613 | Dom3z          | 112403 | DOM-3 homolog Z (C. elegans)                                | -1.89 | 0.60 | 0.04 |
| A_51_P169173 | NM_009875 | Cdkn1b         | 12576  | cyclin-dependent kinase inhibitor 1B                        | -1.24 | 0.60 | 0.55 |
| A_52_P525249 | BC057094  | Trim65         | 338364 | tripartite motif-containing 65                              | -1.61 | 0.60 | 0.13 |
| A_52_P59612  | NM_028866 | Wdr33          | 74320  | WD repeat domain 33                                         | -1.76 | 0.60 | 0.07 |
| A_51_P119597 | NM_009680 | Ap3b1          | 11774  | adaptor-related protein complex 3, beta 1 subunit           | -1.63 | 0.60 | 0.11 |
| A_51_P328622 | NM_027249 | Tlcd2          | 380712 | TLC domain containing 2                                     | -1.42 | 0.60 | 0.24 |
| A_52_P72434  | NM_008439 | Khk            | 16548  | ketohexokinase                                              | -1.49 | 0.60 | 0.20 |
| A_51_P148865 | NM_010753 | Mxd4           | 17122  | Max dimerization protein 4                                  | -1.75 | 0.60 | 0.07 |
| A_52_P446363 | NM_023403 | Mesdc2         | 67943  | mesoderm development candidate 2                            | -1.48 | 0.60 | 0.20 |
| A_51_P295449 | NM_134100 | Mfsd5          | 106073 | major facilitator superfamily domain containing 5           | -1.78 | 0.60 | 0.06 |
| A_52_P472120 | NM_023178 | Dmap1          | 66233  | DNA methyltransferase 1-associated protein 1                | -1.84 | 0.60 | 0.04 |
| A_52_P198009 | AK156814  | Mrpl44         | 69163  | mitochondrial ribosomal protein L44                         | -1.74 | 0.60 | 0.07 |
| A_51_P468140 | NM_008223 | Serpind1       | 15160  | serine (or cysteine) peptidase inhibitor, clade D, member 1 | -1.94 | 0.60 | 0.03 |
| A_52_P426870 | XM_901708 | NA             | NA     | NA                                                          | -1.39 | 0.60 | 0.30 |
| A_52_P456561 | NM_007435 | Abcd1          | 11666  | ATP-binding cassette, sub-family D (ALD), member 1          | -1.70 | 0.60 | 0.09 |
| A_52_P101852 | NM_009242 | Sparc          | 20692  | secreted acidic cysteine rich glycoprotein                  | -1.32 | 0.60 | 0.40 |
| A_52_P537492 | NM_025868 | Tmx2           | 66958  | thioredoxin-related transmembrane protein 2                 | -1.49 | 0.60 | 0.20 |
| A_52_P578521 | NM_025670 | 5730403B1      | 66626  | RIKEN cDNA 5730403B10 gene                                  | -1.74 | 0.60 | 0.07 |

|              |           |           |        |                                                      |       |      |      |
|--------------|-----------|-----------|--------|------------------------------------------------------|-------|------|------|
| A_51_P520802 | NM_145536 | BC020535  | 228788 | cDNA sequence BC020535                               | -1.54 | 0.60 | 0.16 |
| A_52_P647055 | NM_146201 | Zfp553    | 233887 | zinc finger protein 553                              | -1.81 | 0.60 | 0.05 |
| A_51_P138548 | NM_008253 | Hmgb3     | 15354  | high mobility group box 3                            | -1.70 | 0.60 | 0.09 |
| A_51_P171697 | NM_018858 | Pebp1     | 23980  | phosphatidylethanolamine binding protein 1           | -1.60 | 0.60 | 0.13 |
| A_51_P476357 | AV024949  | 281048210 | 67243  | RIKEN cDNA 2810482107 gene                           | -1.69 | 0.60 | 0.09 |
| A_51_P484978 | NM_023224 | Cblc      | 80794  | Casitas B-lineage lymphoma c                         | -1.77 | 0.60 | 0.06 |
| A_51_P418935 | AK004524  | Neurl2    | 415115 | neuralized-like 2 (Drosophila)                       | -1.22 | 0.60 | 0.58 |
| A_51_P519570 | NM_027207 | 1600002K0 | 69770  | RIKEN cDNA 1600002K03 gene                           | -1.31 | 0.60 | 0.44 |
| A_51_P502082 | NM_009103 | Rrm1      | 20133  | ribonucleotide reductase M1                          | -1.97 | 0.60 | 0.03 |
| A_52_P112651 | NM_025828 | Lman2     | 66890  | lectin, mannose-binding 2                            | -1.63 | 0.60 | 0.12 |
| A_51_P497953 | NM_026666 | Ubn1      | 170644 | ubinnuclein 1                                        | -1.73 | 0.60 | 0.07 |
| A_52_P67983  | AK172970  | Lcmt2     | 329504 | leucine carboxyl methyltransferase 2                 | -1.60 | 0.60 | 0.14 |
| A_51_P494646 | NM_001003 | Rtn3      | 20168  | reticulon 3                                          | -1.91 | 0.60 | 0.04 |
| A_51_P314277 | NM_007415 | Parp1     | 11545  | poly (ADP-ribose) polymerase family, member 1        | -1.19 | 0.60 | 0.67 |
| A_51_P476559 | NM_027221 | Krtcap3   | 69815  | keratinocyte associated protein 3                    | -1.20 | 0.60 | 0.67 |
| A_51_P197415 | AK006322  | Dnajc17   | 69408  | Dnaj (Hsp40) homolog, subfamily C, member 17         | -1.40 | 0.60 | 0.28 |
| A_52_P75146  | NM_175364 | Lymr2     | 108755 | LYR motif containing 2                               | -1.20 | 0.60 | 0.61 |
|              |           |           |        | single-strand selective monofunctional uracil DNA    |       |      |      |
| A_52_P595717 | NM_027885 | Smug1     | 71726  | glycosylase                                          | -1.84 | 0.60 | 0.04 |
| A_52_P2754   | NM_019467 | Aif1      | 11629  | allograft inflammatory factor 1                      | -1.19 | 0.60 | 0.67 |
| A_52_P322535 | NM_025479 | 2810021B0 | 66308  | RIKEN cDNA 2810021B07 gene                           | -1.67 | 0.60 | 0.10 |
| A_51_P124315 | NM_177649 | NA        | NA     | NA                                                   | -1.29 | 0.60 | 0.46 |
| A_52_P453508 | AK010630  | Dnase2a   | 13423  | deoxyribonuclease II alpha                           | -1.19 | 0.60 | 0.67 |
| A_52_P139248 | NA        | NA        | NA     | NA                                                   | -1.67 | 0.60 | 0.10 |
| A_52_P635278 | NM_199307 | Ece1      | 230857 | endothelin converting enzyme 1                       | -1.89 | 0.60 | 0.04 |
| A_51_P123091 | NM_029274 | Wbp7      | 75410  | WW domain binding protein 7                          | -1.64 | 0.60 | 0.11 |
| A_51_P492366 | NM_007557 | Bmp7      | 12162  | bone morphogenetic protein 7                         | -1.10 | 0.60 | 0.91 |
| A_52_P362981 | NM_178264 | NA        | NA     | NA                                                   | -1.43 | 0.60 | 0.24 |
| A_52_P380460 | NM_030133 | Srbd1     | 78586  | S1 RNA binding domain 1                              | -1.48 | 0.60 | 0.20 |
| A_51_P492707 | NM_011216 | Ptpro     | 19277  | protein tyrosine phosphatase, receptor type, O       | -1.72 | 0.60 | 0.07 |
| A_51_P194498 | NM_023395 | Wfdc1     | 67866  | WAP four-disulfide core domain 1                     | -1.51 | 0.60 | 0.18 |
|              |           |           |        | processing of precursor 5, ribonuclease P/MRP family |       |      |      |
| A_51_P490198 | NM_026398 | Pop5      | 117109 | (S. cerevisiae)                                      | -1.74 | 0.60 | 0.07 |
| A_51_P516850 | NM_172517 | Rbbp5     | 213464 | retinoblastoma binding protein 5                     | -1.48 | 0.60 | 0.20 |

|              |            |           |        |                                                                   |       |      |      |
|--------------|------------|-----------|--------|-------------------------------------------------------------------|-------|------|------|
| A_51_P500541 | NM_029798  | Flywch2   | 76917  | FLYWCH family member 2                                            | -1.21 | 0.60 | 0.61 |
| A_52_P256182 | NA         | NA        | NA     | NA                                                                | -1.10 | 0.60 | 0.97 |
| A_52_P106482 | NM_009964  | Cryab     | 12955  | crystallin, alpha B                                               | -1.69 | 0.60 | 0.09 |
| A_52_P536731 | NM_001004: | Asap2     | 211914 | 2                                                                 | -1.27 | 0.60 | 0.50 |
| A_52_P570652 | NM_153791  | Flywch1   | 224613 | FLYWCH-type zinc finger 1                                         | -2.00 | 0.60 | 0.02 |
| A_52_P70810  | NM_027959  | Pdia6     | 71853  | protein disulfide isomerase associated 6                          | -1.43 | 0.60 | 0.24 |
| A_52_P148972 | BC038320   | 4930581F2 | 78934  | RIKEN cDNA 4930581F22 gene                                        | -1.40 | 0.60 | 0.28 |
| A_51_P501815 | NM_026914  | 1500032L2 | 69029  | RIKEN cDNA 1500032L24 gene                                        | -1.62 | 0.60 | 0.12 |
| A_51_P288257 | NM_030248  | Cdk5rap3  | 80280  | CDK5 regulatory subunit associated protein 3                      | -1.52 | 0.60 | 0.18 |
| A_52_P48767  | NM_027760  | Rassf8    | 71323  | Ras association (RalGDS/AF-6) domain family (N-terminal) member 8 | -2.04 | 0.60 | 0.02 |
| A_51_P253904 | NM_008704  | Nme1      | 18102  | non-metastatic cells 1, protein (NM23A) expressed in              | -1.21 | 0.60 | 0.61 |
| A_52_P981680 | NM_020022  | Rfc2      | 19718  | replication factor C (activator 1) 2                              | -1.50 | 0.60 | 0.20 |
| A_51_P440852 | NM_145960  | Mtrf1     | 211253 | mitochondrial translational release factor 1                      | -1.44 | 0.60 | 0.24 |
| A_52_P4066   | NM_207245  | Zfp870    | 240066 | zinc finger protein 870                                           | -1.95 | 0.60 | 0.03 |
| A_51_P313093 | AK008991   | Ick       | 56542  | intestinal cell kinase                                            | -1.10 | 0.60 | 0.97 |
| A_51_P416080 | NM_144552  | Stxbp6    | 217517 | syntaxin binding protein 6 (amisyn)                               | -1.67 | 0.60 | 0.10 |
| A_51_P505719 | AY590892   | Dmxl1     | 240283 | Dmx-like 1                                                        | -1.67 | 0.60 | 0.10 |
| A_51_P310298 | NM_178701  | Lrrc8d    | 231549 | leucine rich repeat containing 8D                                 | -1.67 | 0.60 | 0.10 |
| A_52_P238816 | NM_019441  | Ppt2      | 54397  | palmitoyl-protein thioesterase 2                                  | -1.31 | 0.60 | 0.44 |
| A_51_P394446 | AK032385   | Erc2      | 238988 | ELKS/RAB6-interacting/CAST family member 2                        | -1.68 | 0.60 | 0.10 |
| A_52_P679205 | NM_175675  | 4930471M  | 74919  | RIKEN cDNA 4930471M23 gene                                        | -1.68 | 0.60 | 0.10 |
| A_51_P475244 | NM_133984  | Hemk1     | 69536  | HemK methyltransferase family member 1                            | -1.26 | 0.60 | 0.53 |
| A_51_P309917 | NM_001001: | Itga8     | 241226 | integrin alpha 8                                                  | -1.44 | 0.60 | 0.22 |
| A_51_P349825 | NM_026411  | 1700021F0 | 67851  | RIKEN cDNA 1700021F05 gene                                        | -1.72 | 0.60 | 0.07 |
| A_51_P139745 | NM_153151  | Acat3     | 224530 | acetyl-Coenzyme A acetyltransferase 3                             | -1.58 | 0.60 | 0.15 |
| A_52_P456077 | NM_175095  | Comm2     | 52245  | COMM domain containing 2                                          | -1.44 | 0.60 | 0.24 |
| A_52_P509185 | NM_207671  | Zfp318    | 57908  | zinc finger protein 318                                           | -1.37 | 0.60 | 0.33 |
| A_52_P523330 | NM_027215  | Tmem147   | 69804  | transmembrane protein 147                                         | -1.84 | 0.60 | 0.04 |
| A_51_P186469 | AK017789   | Sik3      | 70661  | SIK family kinase 3                                               | -1.62 | 0.60 | 0.12 |
| A_52_P677877 | NM_030208  | 2310079F2 | 78890  | RIKEN cDNA 2310079F23 gene                                        | -1.68 | 0.60 | 0.09 |

|               |           |            |        |                                                                         |       |      |      |
|---------------|-----------|------------|--------|-------------------------------------------------------------------------|-------|------|------|
| A_52_P392591  | NM_027931 | Tars2      | 71807  | threonyl-tRNA synthetase 2, mitochondrial (putative)                    | -1.18 | 0.60 | 0.67 |
| A_51_P264073  | NM_021878 | Jarid2     | 16468  | jumonji, AT rich interactive domain 2                                   | -1.88 | 0.60 | 0.04 |
| A_52_P319606  | NM_178760 | Gpr107     | 277463 | G protein-coupled receptor 107                                          | -1.72 | 0.60 | 0.07 |
| A_51_P473456  | NM_144954 | Ppil2      | 66053  | peptidylprolyl isomerase (cyclophilin)-like 2                           | -1.57 | 0.60 | 0.15 |
| A_52_P311853  | NM_030143 | Ddit4l     | 73284  | DNA-damage-inducible transcript 4-like                                  | -1.21 | 0.59 | 0.61 |
| A_51_P233396  | NM_009358 | Ppp2r5d    | 21770  | protein phosphatase 2, regulatory subunit B (B56), delta isoform        | -1.81 | 0.59 | 0.05 |
| A_51_P320137  | NM_030260 | Zxdc       | 80292  | ZXD family zinc finger C                                                | -1.42 | 0.59 | 0.27 |
| A_51_P435947  | NM_021521 | Med12      | 59024  | mediator of RNA polymerase II transcription, subunit 12 homolog (yeast) | -1.85 | 0.59 | 0.04 |
| A_51_P270725  | AK089493  | Phkb       | 102093 | phosphorylase kinase beta                                               | -1.73 | 0.59 | 0.07 |
| A_51_P126647  | NM_025463 | 1810009A1  | 66276  | RIKEN cDNA 1810009A15 gene                                              | -1.74 | 0.59 | 0.07 |
| A_51_P328133  | NM_028923 | Gle1       | 74412  | GLE1 RNA export mediator (yeast)                                        | -1.87 | 0.59 | 0.04 |
| A_52_P73021   | AK036533  | Scly       | 50880  | selenocysteine lyase                                                    | -1.38 | 0.59 | 0.30 |
| A_52_P329917  | NM_022999 | Prrg2      | 65116  | proline-rich Gla (G-carboxyglutamic acid) polypeptide 2                 | -1.24 | 0.59 | 0.55 |
| A_52_P306697  | NM_007868 | Dmd        | 13405  | dystrophin, muscular dystrophy                                          | -1.15 | 0.59 | 0.77 |
| A_51_P333923  | NM_133681 | Tspan1     | 66805  | tetraspanin 1                                                           | -1.33 | 0.59 | 0.37 |
| A_51_P441942  | NM_009383 | Tial1      | 21843  | Tia1 cytotoxic granule-associated RNA binding protein-like 1            | -1.49 | 0.59 | 0.20 |
| A_52_P1004175 | AK037327  | NA         | NA     | NA                                                                      | -1.96 | 0.59 | 0.03 |
| A_52_P388155  | NM_133829 | Mfsd6      | 98682  | major facilitator superfamily domain containing 6                       | -1.27 | 0.59 | 0.50 |
| A_52_P87229   | NA        | NA         | NA     | NA                                                                      | -1.46 | 0.59 | 0.21 |
| A_52_P243516  | NM_201361 | Fam82a1    | 381110 | family with sequence similarity 82, member A1                           | -1.59 | 0.59 | 0.14 |
| A_51_P473438  | AK080901  | D730045B01 | 77867  | RIKEN cDNA D730045B01 gene                                              | -1.38 | 0.59 | 0.30 |
| A_51_P218165  | NM_146252 | Tbc1d13    | 70296  | TBC1 domain family, member 13                                           | -1.77 | 0.59 | 0.06 |
| A_52_P546110  | NM_178017 | Hmgxb4     | 70823  | HMG box domain containing 4                                             | -1.77 | 0.59 | 0.06 |
| A_52_P389347  | NM_023348 | Snap29     | 67474  | synaptosomal-associated protein 29                                      | -2.03 | 0.59 | 0.02 |
| A_51_P204630  | AK032255  | Atp2c1     | 235574 | ATPase, Ca <sup>++</sup> -sequestering                                  | -1.37 | 0.59 | 0.33 |
| A_51_P388432  | NM_130889 | Anp32b     | 67628  | acidic (leucine-rich) nuclear phosphoprotein 32 family, member B        | -2.01 | 0.59 | 0.02 |
| A_52_P413502  | NM_025542 | 2410001C2  | 66404  | RIKEN cDNA 2410001C21 gene                                              | -1.57 | 0.59 | 0.15 |

|               |           |          |        |                                                                                                                                |       |      |      |
|---------------|-----------|----------|--------|--------------------------------------------------------------------------------------------------------------------------------|-------|------|------|
| A_51_P433026  | NM_028922 | Ppapdc2  | 74411  | phosphatidic acid phosphatase type 2 domain containing 2                                                                       | -1.47 | 0.59 | 0.21 |
| A_51_P257065  | NM_018786 | Prpf40b  | 54614  | PRP40 pre-mRNA processing factor 40 homolog B (yeast)                                                                          | -1.90 | 0.59 | 0.04 |
| A_52_P739182  | AK053478  | NA       | NA     | NA                                                                                                                             | -1.71 | 0.59 | 0.07 |
| A_52_P38436   | NM_130862 | Baiap2   | 108100 | brain-specific angiogenesis inhibitor 1-associated protein 2                                                                   | -1.15 | 0.59 | 0.82 |
| A_52_P42044   | XM_977572 | Nbeal2   | 235627 | neurobeachin-like 2                                                                                                            | -1.95 | 0.59 | 0.03 |
| A_51_P189438  | NM_172272 | Pars2    | 230577 | prolyl-tRNA synthetase (mitochondrial)(putative) pleckstrin homology domain containing, family G (with RhoGef domain) member 3 | -1.84 | 0.59 | 0.04 |
| A_51_P327369  | AK080928  | Plekhg3  | 263406 | NA                                                                                                                             | -1.73 | 0.59 | 0.07 |
| A_52_P1171803 | AK046815  | NA       | NA     | NA                                                                                                                             | -1.53 | 0.59 | 0.17 |
| A_51_P510914  | AK013921  | Gm6710   | 626832 | predicted gene 6710                                                                                                            | -1.51 | 0.59 | 0.18 |
| A_51_P110035  | NA        | NA       | NA     | NA                                                                                                                             | -1.64 | 0.59 | 0.11 |
| A_52_P434038  | NM_030597 | Lsm2     | 27756  | LSM2 homolog, U6 small nuclear RNA associated (S. cerevisiae)                                                                  | -1.97 | 0.59 | 0.03 |
| A_52_P507839  | AK048435  | Fam126b  | 213056 | family with sequence similarity 126, member B                                                                                  | -1.40 | 0.59 | 0.28 |
| A_51_P234462  | NM_133756 | Gpn1     | 74254  | GPN-loop GTPase 1                                                                                                              | -1.95 | 0.59 | 0.03 |
| A_51_P343889  | NM_175675 | 4930471M | 74919  | RIKEN cDNA 4930471M23 gene                                                                                                     | -1.93 | 0.59 | 0.03 |
| A_51_P189722  | NM_172549 | Cabin1   | 104248 | calcineurin binding protein 1                                                                                                  | -1.83 | 0.59 | 0.05 |
| A_52_P212686  | NM_146191 | Lrrk1    | 233328 | leucine-rich repeat kinase 1                                                                                                   | -1.24 | 0.59 | 0.55 |
| A_51_P223025  | BC016533  | Dock5    | 68813  | dedicator of cytokinesis 5                                                                                                     | -1.89 | 0.59 | 0.04 |
| A_52_P104700  | NM_026342 | Fam114a2 | 67726  | family with sequence similarity 114, member A2                                                                                 | -1.13 | 0.59 | 0.86 |
| A_52_P519416  | BC060186  | Rbbp5    | 213464 | retinoblastoma binding protein 5                                                                                               | -1.71 | 0.59 | 0.07 |
| A_52_P255125  | AK020104  | Rnf170   | 77733  | ring finger protein 170                                                                                                        | -1.48 | 0.59 | 0.20 |
| A_51_P399960  | NM_027422 | Mier2    | 70427  | mesoderm induction early response 1, family member 2                                                                           | -1.64 | 0.59 | 0.11 |
| A_51_P385598  | NM_008063 | Slc37a4  | 14385  | solute carrier family 37 (glucose-6-phosphate transporter), member 4                                                           | -1.68 | 0.59 | 0.09 |
| A_51_P455338  | NM_053113 | Ear11    | 93726  | eosinophil-associated, ribonuclease A family, member 11                                                                        | -1.24 | 0.59 | 0.55 |
| A_51_P392486  | NM_028209 | Ttc4     | 72354  | tetratricopeptide repeat domain 4                                                                                              | -1.63 | 0.59 | 0.11 |
| A_52_P876692  | NA        | NA       | NA     | NA                                                                                                                             | -1.62 | 0.59 | 0.12 |



|              |           |                 |        |                                                                                            |       |      |      |
|--------------|-----------|-----------------|--------|--------------------------------------------------------------------------------------------|-------|------|------|
| A_51_P364031 | NM_026213 | Ttc33           | 67515  | tetratricopeptide repeat domain 33                                                         | -1.98 | 0.59 | 0.03 |
| A_51_P425768 | NM_026005 | 2610301B2       | 67157  | RIKEN cDNA 2610301B20 gene                                                                 | -1.50 | 0.59 | 0.20 |
| A_51_P243342 | NM_010347 | Aes             | 14797  | amino-terminal enhancer of split                                                           | -1.74 | 0.59 | 0.07 |
| A_51_P176042 | NM_013631 | Pklr            | 18770  | pyruvate kinase liver and red blood cell                                                   | -1.97 | 0.59 | 0.03 |
| A_52_P44765  | NM_144880 | Ppp2r5a         | 226849 | protein phosphatase 2, regulatory subunit B (B56),<br>alpha isoform                        | -1.93 | 0.59 | 0.03 |
| A_51_P146126 | AK169586  | Cdkn1b          | 12576  | cyclin-dependent kinase inhibitor 1B<br>immunoglobulin superfamily containing leucine-rich | -1.19 | 0.59 | 0.67 |
| A_51_P140742 | NM_012043 | Islr            | 26968  | repeat                                                                                     | -1.46 | 0.59 | 0.21 |
| A_52_P512427 | XM_132808 | 2510049J1       | 70291  | RIKEN cDNA 2510049J12 gene                                                                 | -2.04 | 0.59 | 0.02 |
| A_52_P541939 | NM_021527 | Mkks            | 59030  | McKusick-Kaufman syndrome protein                                                          | -1.49 | 0.59 | 0.20 |
| A_51_P381784 | BC094932  | Exosc7          | 66446  | exosome component 7                                                                        | -1.69 | 0.59 | 0.09 |
| A_52_P276986 | NM_133865 | Dclre1b         | 140917 | DNA cross-link repair 1B, PSO2 homolog ( <i>S. cerevisiae</i> )                            | -1.76 | 0.59 | 0.07 |
| A_52_P128935 | NM_026501 | Fam134c         | 67998  | family with sequence similarity 134, member C                                              | -1.86 | 0.59 | 0.04 |
| A_52_P434556 | NM_175149 | 2310022B0       | 69551  | RIKEN cDNA 2310022B05 gene                                                                 | -1.61 | 0.59 | 0.13 |
| A_51_P462814 | NM_023637 | Sars2           | 71984  | seryl-aminoacyl-tRNA synthetase 2                                                          | -1.86 | 0.59 | 0.04 |
| A_51_P227777 | NM_009409 | Top2b           | 21974  | topoisomerase (DNA) II beta                                                                | -1.67 | 0.59 | 0.10 |
| A_51_P111212 | NM_026269 | 1110007L1       | 67604  | RIKEN cDNA 1110007L15 gene                                                                 | -1.48 | 0.59 | 0.20 |
| A_52_P161167 | NM_021312 | Wdr12           | 57750  | WD repeat domain 12                                                                        | -1.67 | 0.59 | 0.10 |
| A_51_P261718 | NM_134037 | Acly            | 104112 | ATP citrate lyase<br>NIMA (never in mitosis gene a)-related expressed kinase               | -1.48 | 0.59 | 0.20 |
| A_52_P818995 | AK049625  | Nek1            | 18004  | 1                                                                                          | -1.59 | 0.59 | 0.14 |
| A_52_P424462 | NM_026184 | Ero1lb          | 67475  | ERO1-like beta ( <i>S. cerevisiae</i> )                                                    | -1.30 | 0.59 | 0.44 |
| A_52_P504460 | AK013634  | Ccnt2           | 72949  | cyclin T2                                                                                  | -1.40 | 0.59 | 0.28 |
| A_51_P229732 | AK015605  | 4930481B0       | 74937  | RIKEN cDNA 4930481B07 gene<br>potassium channel tetramerisation domain containing          | -1.95 | 0.59 | 0.03 |
| A_52_P45926  | BC048161  | Kctd20          | 66989  | 20                                                                                         | -1.84 | 0.59 | 0.04 |
| A_52_P655008 | AK044382  | Iffo1           | 320678 | intermediate filament family orphan 1                                                      | -1.30 | 0.59 | 0.44 |
| A_51_P292073 | NM_026897 | Haghl           | 68977  | hydroxyacylglutathione hydrolase-like                                                      | -1.88 | 0.59 | 0.04 |
| A_52_P173368 | XM_920133 | LOC631981631981 |        | similar to small nuclear ribonucleoprotein polypeptide A                                   | -1.65 | 0.59 | 0.11 |
| A_51_P204454 | AF083215  | Skp2            | 27401  | S-phase kinase-associated protein 2 (p45)                                                  | -1.62 | 0.59 | 0.12 |
| A_51_P380078 | NA        | NA              | NA     | NA                                                                                         | -1.43 | 0.59 | 0.24 |

|              |           |           |        |                                                                                       |       |      |      |
|--------------|-----------|-----------|--------|---------------------------------------------------------------------------------------|-------|------|------|
| A_52_P338956 | XM_203596 | NA        | NA     | NA                                                                                    | -1.68 | 0.59 | 0.10 |
| A_51_P471779 | NM_026737 | Phf5a     | 68479  | PHD finger protein 5A                                                                 | -2.19 | 0.59 | 0.01 |
| A_51_P433834 | NM_146137 | Amigo1    | 229715 | adhesion molecule with Ig like domain 1                                               | -1.94 | 0.59 | 0.03 |
| A_52_P361611 | BC055752  | Zfp652    | 268469 | zinc finger protein 652                                                               | -1.84 | 0.59 | 0.04 |
| A_51_P138538 | NM_026892 | Eif1b     | 68969  | eukaryotic translation initiation factor 1B                                           | -1.90 | 0.59 | 0.04 |
| A_51_P218895 | NM_008064 | Gaa       | 14387  | glucosidase, alpha, acid                                                              | -1.72 | 0.59 | 0.07 |
| A_52_P225207 | NM_007523 | Bak1      | 12018  | BCL2-antagonist/killer 1                                                              | -1.27 | 0.59 | 0.50 |
| A_52_P378765 | NM_001001 | Ccdc111   | 408022 | coiled-coil domain containing 111                                                     | -1.51 | 0.59 | 0.18 |
| A_52_P563942 | NM_013908 | Fbxw5     | 30839  | F-box and WD-40 domain protein 5                                                      | -1.59 | 0.59 | 0.14 |
| A_51_P454152 | AK048416  | Ercc6     | 319955 | excision repair cross-complementing rodent repair deficiency, complementation group 6 | -1.61 | 0.59 | 0.13 |
| A_52_P233441 | NM_008090 | Gata2     | 14461  | GATA binding protein 2                                                                | -1.82 | 0.59 | 0.05 |
| A_52_P647393 | NM_153158 | E130308A1 | 230259 | RIKEN cDNA E130308A19 gene                                                            | -1.65 | 0.59 | 0.11 |
| A_52_P559034 | AK052765  | Klhdc5    | 232539 | kelch domain containing 5                                                             | -1.87 | 0.59 | 0.04 |
| A_51_P339822 | NM_138630 | Arhgap4   | 171207 | Rho GTPase activating protein 4                                                       | -1.50 | 0.59 | 0.20 |
| A_52_P286098 | NA        | NA        | NA     | NA                                                                                    | -1.62 | 0.59 | 0.12 |
| A_51_P285413 | NM_175023 | Rbbp6     | 19647  | retinoblastoma binding protein 6                                                      | -1.59 | 0.59 | 0.14 |
| A_51_P358344 | NM_007732 | Col17a1   | 12821  | collagen, type XVII, alpha 1                                                          | -1.70 | 0.59 | 0.09 |
| A_51_P414115 | NM_172607 | Naprt1    | 223646 | nicotinate phosphoribosyltransferase domain containing 1                              | -2.04 | 0.59 | 0.02 |
| A_51_P436447 | NM_172458 | Zfp871    | 208292 | zinc finger protein 871                                                               | -1.65 | 0.59 | 0.11 |
| A_51_P108948 | NM_019715 | Kcmf1     | 74287  | potassium channel modulatory factor 1                                                 | -1.73 | 0.59 | 0.07 |
| A_52_P336290 | NM_029519 | Rap2a     | 76108  | RAS related protein 2a                                                                | -1.73 | 0.59 | 0.07 |
| A_52_P48723  | NM_053180 | Cdk20     | 105278 | cyclin-dependent kinase 20                                                            | -1.53 | 0.59 | 0.17 |
| A_51_P474151 | NM_177746 | Awat2     | 245532 | acyl-CoA wax alcohol acyltransferase 2                                                | -2.19 | 0.59 | 0.01 |
| A_51_P422165 | NM_023876 | Elp4      | 77766  | elongation protein 4 homolog ( <i>S. cerevisiae</i> )                                 | -1.46 | 0.59 | 0.22 |
| A_51_P169087 | NM_001033 | Gls2      | 216456 | glutaminase 2 (liver, mitochondrial)                                                  | -1.72 | 0.59 | 0.07 |
| A_52_P398158 | NM_146173 | Tspan33   | 232670 | tetraspanin 33                                                                        | -1.56 | 0.59 | 0.15 |
| A_52_P672740 | NM_019491 | Rala      | 56044  | v-ral simian leukemia viral oncogene homolog A (ras related)                          | -1.45 | 0.59 | 0.22 |
| A_51_P323583 | NM_134111 | Eaf2      | 106389 | ELL associated factor 2                                                               | -1.42 | 0.59 | 0.27 |
| A_52_P662098 | NM_019671 | Net1      | 56349  | neuroepithelial cell transforming gene 1                                              | -1.44 | 0.59 | 0.22 |
| A_51_P357085 | NM_011722 | Dctn6     | 22428  | dynactin 6                                                                            | -1.74 | 0.59 | 0.07 |

|              |           |           |        |                                                                 |       |      |      |
|--------------|-----------|-----------|--------|-----------------------------------------------------------------|-------|------|------|
| A_51_P483488 | NM_029020 | Abcb8     | 74610  | ATP-binding cassette, sub-family B (MDR/TAP), member 8          | -1.86 | 0.59 | 0.04 |
| A_51_P158552 | NM_016684 | Zscan12   | 22758  | zinc finger and SCAN domain containing 12                       | -1.49 | 0.59 | 0.20 |
| A_51_P511766 | AK039706  | Bpnt1     | 23827  | bisphosphate 3'-nucleotidase 1                                  | -1.68 | 0.59 | 0.09 |
| A_52_P355095 | NM_172516 | Dstyk     | 213452 | dual serine/threonine and tyrosine protein kinase               | -1.74 | 0.59 | 0.07 |
| A_52_P228684 | AK040147  | Ints3     | 229543 | integrator complex subunit 3                                    | -1.71 | 0.59 | 0.07 |
| A_51_P388042 | NM_013915 | Zfp238    | 30928  | zinc finger protein 238                                         | -1.50 | 0.59 | 0.20 |
| A_52_P460319 | NM_010722 | Lmnb2     | 16907  | lamin B2                                                        | -1.62 | 0.59 | 0.12 |
| A_52_P233673 | NM_020594 | Zc3h8     | 57432  | zinc finger CCCH type containing 8                              | -1.14 | 0.59 | 0.82 |
| A_52_P780972 | AV079128  | Map3k4    | 26407  | mitogen-activated protein kinase kinase kinase 4                | -1.86 | 0.59 | 0.04 |
| A_52_P644692 | AK036209  | Atxn2     | 20239  | ataxin 2                                                        | -1.91 | 0.59 | 0.04 |
| A_51_P223078 | AK034302  | Gm10033   | 378466 | predicted gene 10033                                            | -1.50 | 0.59 | 0.20 |
| A_52_P570240 | BC080858  | Kbtbd11   | 74901  | kelch repeat and BTB (POZ) domain containing 11                 | -1.73 | 0.59 | 0.07 |
| A_52_P360453 | AK084271  | 3110052M0 | 73229  | RIKEN cDNA 3110052M02 gene                                      | -1.37 | 0.59 | 0.33 |
| A_52_P649285 | NA        | NA        | NA     | NA                                                              | -1.73 | 0.59 | 0.07 |
| A_51_P372456 | NM_026621 | NA        | NA     | NA                                                              | -1.88 | 0.59 | 0.04 |
| A_52_P76146  | NM_153743 | Dnmt3a    | 13435  | DNA methyltransferase 3A                                        | -1.20 | 0.59 | 0.61 |
| A_51_P398004 | NM_013595 | Mbd3      | 17192  | methyl-CpG binding domain protein 3                             | -1.53 | 0.59 | 0.17 |
| A_51_P302458 | NM_023564 | Plscr3    | 70310  | phospholipid scramblase 3                                       | -1.81 | 0.59 | 0.05 |
| A_52_P253299 | NM_001003 | BC030307  | 103220 | cDNA sequence BC030307                                          | -1.35 | 0.59 | 0.37 |
| A_51_P219542 | NM_019425 | Gnpnat1   | 54342  | glucosamine-phosphate N-acetyltransferase 1                     | -1.75 | 0.59 | 0.07 |
| A_52_P582251 | AK006209  | 1700021J0 | 72235  | RIKEN cDNA 1700021J08 gene                                      | -1.12 | 0.59 | 0.86 |
| A_51_P279183 | NM_145496 | Dak       | 225913 | dihydroxyacetone kinase 2 homolog (yeast)                       | -1.72 | 0.59 | 0.07 |
| A_51_P426276 | NM_133667 | Pdk2      | 18604  | pyruvate dehydrogenase kinase, isoenzyme 2                      | -1.50 | 0.59 | 0.20 |
| A_51_P108408 | NM_007563 | Bpgm      | 12183  | 2,3-bisphosphoglycerate mutase                                  | -1.73 | 0.59 | 0.07 |
| A_52_P136914 | NM_024437 | Nudt7     | 67528  | nudix (nucleoside diphosphate linked moiety X)-type motif 7     | -1.24 | 0.59 | 0.55 |
| A_51_P387648 | NM_008307 | Trmt2a    | 15547  | TRM2 tRNA methyltransferase 2 homolog A (S. cerevisiae)         | -1.50 | 0.59 | 0.20 |
| A_52_P523480 | NM_009055 | Rfx1      | 19724  | regulatory factor X, 1 (influences HLA class II expression)     | -1.88 | 0.59 | 0.04 |
| A_52_P110040 | NM_009774 | Bub3      | 12237  | budding uninhibited by benzimidazoles 3 homolog (S. cerevisiae) | -1.78 | 0.59 | 0.06 |

|               |           |           |        |                                                              |       |      |      |
|---------------|-----------|-----------|--------|--------------------------------------------------------------|-------|------|------|
| A_51_P186446  | AK088715  | Mtmr10    | 233315 | myotubularin related protein 10                              | -1.72 | 0.59 | 0.07 |
| A_51_P382347  | AK048877  | Nphp3     | 74025  | nephronophthisis 3 (adolescent)                              | -1.43 | 0.59 | 0.24 |
| A_51_P386660  | NM_010173 | Faah      | 14073  | fatty acid amide hydrolase                                   | -1.76 | 0.59 | 0.07 |
| A_51_P351413  | NM_028521 | Phospho2  | 73373  | phosphatase, orphan 2                                        | -1.48 | 0.59 | 0.20 |
| A_52_P61703   | NM_178364 | Zfp369    | 170936 | zinc finger protein 369                                      | -1.54 | 0.59 | 0.16 |
| A_51_P431046  | NM_009182 | St8sia3   | 20451  | ST8 alpha-N-acetyl-neuraminide alpha-2,8-sialyltransferase 3 | -1.40 | 0.59 | 0.28 |
| A_52_P360076  | AK043262  | E330013P0 | 320870 | RIKEN cDNA E330013P08 gene                                   | -1.78 | 0.59 | 0.06 |
| A_51_P391445  | NM_010511 | Ifngr1    | 15979  | interferon gamma receptor 1                                  | -1.78 | 0.59 | 0.06 |
| A_51_P195573  | NM_010066 | Dnmt1     | 13433  | DNA methyltransferase (cytosine-5) 1                         | -1.78 | 0.59 | 0.06 |
| A_51_P354526  | NM_025912 | 2010011I2 | 67017  | RIKEN cDNA 2010011I20 gene                                   | -1.22 | 0.59 | 0.58 |
| A_51_P520084  | NM_011942 | Lypla2    | 26394  | lysophospholipase 2                                          | -1.62 | 0.59 | 0.12 |
| A_51_P189916  | NM_133800 | Nol12     | 97961  | nucleolar protein 12                                         | -1.38 | 0.59 | 0.30 |
| A_52_P597634  | NM_021457 | Fzd1      | 14362  | frizzled homolog 1 (Drosophila)                              | -1.50 | 0.59 | 0.20 |
| A_51_P214449  | NM_023127 | Polr2k    | 17749  | polymerase (RNA) II (DNA directed) polypeptide K             | -1.32 | 0.59 | 0.40 |
| A_52_P311104  | NM_012047 | Brd7      | 26992  | bromodomain containing 7                                     | -2.02 | 0.59 | 0.02 |
| A_51_P139920  | NM_011844 | Mgll      | 23945  | monoglyceride lipase                                         | -1.55 | 0.59 | 0.16 |
| A_52_P151303  | AK085228  | 1810030O  | 69155  | RIKEN cDNA 1810030O07 gene                                   | -1.20 | 0.59 | 0.61 |
| A_51_P208870  | NM_027476 | Zdhhc24   | 70605  | zinc finger, DHHC domain containing 24                       | -1.59 | 0.59 | 0.14 |
| A_51_P256919  | NM_013672 | Sp1       | 20683  | trans-acting transcription factor 1                          | -1.48 | 0.59 | 0.20 |
| A_51_P467770  | NM_028874 | Snx19     | 102607 | sorting nexin 19                                             | -1.89 | 0.59 | 0.04 |
| A_51_P355821  | NM_026999 | Zfp688    | 69234  | zinc finger protein 688                                      | -1.39 | 0.59 | 0.28 |
| A_52_P274238  | NM_021500 | Maea      | 59003  | macrophage erythroblast attacher                             | -2.02 | 0.59 | 0.02 |
| A_52_P368473  | NM_011845 | Mid2      | 23947  | midline 2                                                    | -1.66 | 0.59 | 0.11 |
| A_52_P1010776 | XM_898625 | 2900056M  | 72997  | RIKEN cDNA 2900056M20 gene                                   | -2.00 | 0.59 | 0.02 |
| A_52_P272811  | NM_053193 | Cpsf1     | 94230  | cleavage and polyadenylation specific factor 1               | -1.80 | 0.59 | 0.05 |
| A_51_P462311  | NM_023422 | Hist1h2bc | 68024  | histone cluster 1, H2bc                                      | -1.65 | 0.59 | 0.11 |
| A_51_P515056  | NM_013565 | Itga3     | 16400  | integrin alpha 3                                             | -1.85 | 0.59 | 0.04 |
| A_51_P408382  | NM_001005 | Itgb4     | 192897 | integrin beta 4                                              | -1.38 | 0.59 | 0.30 |
| A_52_P417846  | NM_198100 | Tbkbp1    | 73174  | TBK1 binding protein 1                                       | -1.24 | 0.59 | 0.55 |
| A_52_P472725  | AK037872  | Pex13     | 72129  | peroxisomal biogenesis factor 13                             | -1.20 | 0.59 | 0.67 |
| A_51_P264132  | NM_027789 | 5430416O  | 71406  | RIKEN cDNA 5430416O09 gene                                   | -1.70 | 0.59 | 0.09 |
| A_51_P506513  | NM_024236 | Qdpr      | 110391 | quinoid dihydropteridine reductase                           | -1.91 | 0.59 | 0.04 |

|              |           |            |        |                                                                                                |       |      |      |
|--------------|-----------|------------|--------|------------------------------------------------------------------------------------------------|-------|------|------|
| A_52_P235241 | NM_145927 | Fntb       | 110606 | farnesyltransferase, CAAX box, beta<br>asparagine-linked glycosylation 1 homolog (yeast, beta- | -1.80 | 0.59 | 0.05 |
| A_51_P329793 | NM_145362 | Alg1       | 208211 | 1,4-mannosyltransferase)                                                                       | -1.75 | 0.59 | 0.07 |
| A_51_P219064 | NM_001077 | Prmt2      | 15468  | protein arginine N-methyltransferase 2                                                         | -1.37 | 0.59 | 0.33 |
| A_52_P402127 | BC093515  | NA         | NA     | NA                                                                                             | -1.25 | 0.59 | 0.53 |
| A_52_P333178 | NM_011131 | Pold1      | 18971  | polymerase (DNA directed), delta 1, catalytic subunit                                          | -1.60 | 0.59 | 0.14 |
| A_52_P421815 | AK033274  | Hgf        | 15234  | hepatocyte growth factor                                                                       | -1.22 | 0.58 | 0.58 |
| A_51_P515997 | NM_008717 | Zfml       | 18139  | zinc finger, matrin-like                                                                       | -1.85 | 0.58 | 0.04 |
| A_52_P434729 | NM_144534 | Tmem38a    | 74166  | transmembrane protein 38A                                                                      | -1.48 | 0.58 | 0.20 |
| A_51_P389506 | BC012231  | 2810453I06 | 67238  | RIKEN cDNA 2810453I06 gene                                                                     | -1.37 | 0.58 | 0.33 |
| A_51_P193302 | NM_025305 | Mrps7      | 50529  | mitochondrial ribosomal protein S7                                                             | -1.15 | 0.58 | 0.82 |
| A_51_P204492 | XM_891788 | NA         | NA     | NA                                                                                             | -1.72 | 0.58 | 0.07 |
| A_52_P474658 | NM_026121 | Bag4       | 67384  | BCL2-associated athanogene 4                                                                   | -1.38 | 0.58 | 0.30 |
| A_51_P322994 | NM_175001 | Mrpl22     | 216767 | mitochondrial ribosomal protein L22                                                            | -1.71 | 0.58 | 0.09 |
| A_51_P176459 | NM_017479 | Myst4      | 54169  | MYST histone acetyltransferase monocytic leukemia 4                                            | -1.45 | 0.58 | 0.22 |
| A_51_P370286 | NM_011869 | Med24      | 23989  | mediator complex subunit 24                                                                    | -1.99 | 0.58 | 0.03 |
| A_51_P301311 | NM_028412 | Ciz1       | 68379  | CDKN1A interacting zinc finger protein 1                                                       | -1.67 | 0.58 | 0.10 |
| A_51_P482043 | NM_175266 | Epm2aip1   | 77781  | EPM2A (laforin) interacting protein 1                                                          | -1.76 | 0.58 | 0.07 |
| A_52_P176361 | NM_178200 | Hist1h2bm  | 319186 | histone cluster 1, H2bm                                                                        | -1.60 | 0.58 | 0.14 |
| A_52_P41014  | NM_028963 | 4933427D14 | 74477  | RIKEN cDNA 4933427D14 gene                                                                     | -1.53 | 0.58 | 0.17 |
| A_51_P281384 | NM_029734 | Wdyhv1     | 76773  | WDYHV motif containing 1<br>ArfGAP with coiled-coil, ankyrin repeat and PH domains             | -1.82 | 0.58 | 0.05 |
| A_52_P507364 | NM_030138 | Acap2      | 78618  | 2<br>golgi associated, gamma adaptin ear containing, ARF                                       | -1.33 | 0.58 | 0.40 |
| A_51_P226853 | NM_145929 | Gga1       | 106039 | binding protein 1                                                                              | -1.99 | 0.58 | 0.03 |
| A_52_P1687   | NM_199472 | NA         | NA     | NA                                                                                             | -1.48 | 0.58 | 0.20 |
| A_52_P24896  | AK028390  | NA         | NA     | NA                                                                                             | -1.30 | 0.58 | 0.44 |
| A_51_P113403 | NM_178743 | Slc26a11   | 268512 | solute carrier family 26, member 11<br>Williams-Beuren syndrome chromosome region 16           | -1.54 | 0.58 | 0.16 |
| A_51_P386526 | NM_033572 | Wbscr16    | 94254  | homolog (human)<br>transient receptor potential cation channel, subfamily                      | -1.78 | 0.58 | 0.06 |
| A_52_P303100 | NM_175130 | Trpm4      | 68667  | M, member 4                                                                                    | -1.34 | 0.58 | 0.37 |

|              |           |           |        |                                                                                                      |       |      |      |
|--------------|-----------|-----------|--------|------------------------------------------------------------------------------------------------------|-------|------|------|
| A_52_P679101 | NM_011597 | Tjp2      | 21873  | tight junction protein 2                                                                             | -1.51 | 0.58 | 0.18 |
| A_51_P232399 | NM_027857 | Acy3      | 71670  | aspartoacylase (aminoacylase) 3                                                                      | -1.76 | 0.58 | 0.07 |
| A_51_P202541 | NM_025298 | Polr3e    | 26939  | polymerase (RNA) III (DNA directed) polypeptide E<br>DCN1, defective in cullin neddylation 1, domain | -1.79 | 0.58 | 0.06 |
| A_52_P414420 | NM_033623 | Dcun1d1   | 114893 | containing 1 ( <i>S. cerevisiae</i> )                                                                | -1.93 | 0.58 | 0.03 |
| A_52_P170635 | NM_007547 | Sirpa     | 19261  | signal-regulatory protein alpha                                                                      | -1.60 | 0.58 | 0.13 |
| A_52_P188215 | AK034089  | 3110047P2 | 319807 | RIKEN cDNA 3110047P20 gene                                                                           | -2.06 | 0.58 | 0.02 |
| A_52_P118100 | XM_356065 | Ddhd2     | 72108  | DDHD domain containing 2                                                                             | -1.73 | 0.58 | 0.07 |
| A_52_P314181 | AK040606  | NA        | NA     | NA<br>DCN1, defective in cullin neddylation 1, domain                                                | -1.48 | 0.58 | 0.20 |
| A_52_P238014 | NM_178896 | Dcun1d4   | 100737 | containing 4 ( <i>S. cerevisiae</i> )                                                                | -1.33 | 0.58 | 0.37 |
| A_52_P491244 | NM_133208 | Zfp287    | 170740 | zinc finger protein 287                                                                              | -1.74 | 0.58 | 0.07 |
| A_51_P310398 | NM_021028 | Tk2       | 57813  | thymidine kinase 2, mitochondrial                                                                    | -1.80 | 0.58 | 0.05 |
| A_52_P88695  | NM_016811 | Dgka      | 13139  | diacylglycerol kinase, alpha                                                                         | -1.75 | 0.58 | 0.07 |
| A_51_P185871 | NM_018810 | Mkrn1     | 54484  | makorin, ring finger protein, 1                                                                      | -1.48 | 0.58 | 0.20 |
| A_52_P819555 | AK048651  | NA        | NA     | NA<br>solute carrier family 4, sodium bicarbonate                                                    | -1.77 | 0.58 | 0.06 |
| A_51_P140347 | NM_172830 | Slc4a9    | 240215 | cotransporter, member 9                                                                              | -1.29 | 0.58 | 0.46 |
| A_51_P495485 | NM_028264 | Tmem55a   | 72519  | transmembrane protein 55A                                                                            | -2.05 | 0.58 | 0.02 |
| A_51_P452280 | NM_010839 | Mtcp1     | 17763  | mature T-cell proliferation 1                                                                        | -1.57 | 0.58 | 0.15 |
| A_52_P19109  | NM_172538 | Vezt      | 215008 | vezatin, adherens junctions transmembrane protein                                                    | -1.54 | 0.58 | 0.16 |
| A_52_P868210 | AK086789  | NA        | NA     | NA                                                                                                   | -1.68 | 0.58 | 0.09 |
| A_52_P131353 | NM_177343 | Camk1d    | 227541 | calcium/calmodulin-dependent protein kinase ID                                                       | -1.72 | 0.58 | 0.07 |
| A_52_P120510 | NM_178747 | Gulo      | 268756 | gulonolactone (L-) oxidase                                                                           | -1.94 | 0.58 | 0.03 |
| A_51_P216595 | NM_175482 | Usp28     | 235323 | ubiquitin specific peptidase 28                                                                      | -1.72 | 0.58 | 0.07 |
| A_52_P271    | NM_029669 | Dnajc18   | 76594  | Dnaj (Hsp40) homolog, subfamily C, member 18                                                         | -1.49 | 0.58 | 0.20 |
| A_52_P388224 | NM_175665 | Hist1h2bk | 319184 | histone cluster 1, H2bk                                                                              | -1.64 | 0.58 | 0.11 |
| A_52_P534870 | NM_009741 | Bcl2      | 12043  | B-cell leukemia/lymphoma 2                                                                           | -1.54 | 0.58 | 0.17 |
| A_51_P359237 | NM_025439 | Tmem9     | 66241  | transmembrane protein 9                                                                              | -1.51 | 0.58 | 0.18 |
| A_52_P602996 | NM_025670 | 5730403B1 | 66626  | RIKEN cDNA 5730403B10 gene                                                                           | -1.12 | 0.58 | 0.86 |
| A_52_P61339  | AK036089  | Cenpo     | 52504  | centromere protein O                                                                                 | -1.81 | 0.58 | 0.05 |
| A_51_P399614 | NM_023322 | Zkscan14  | 67235  | zinc finger with KRAB and SCAN domains 14                                                            | -1.60 | 0.58 | 0.14 |

|              |           |            |        |                                                                   |       |      |      |
|--------------|-----------|------------|--------|-------------------------------------------------------------------|-------|------|------|
| A_51_P194853 | NM_146013 | Sec14l4    | 103655 | SEC14-like 4 ( <i>S. cerevisiae</i> )                             | -1.61 | 0.58 | 0.13 |
| A_51_P308111 | AK136371  | NA         | NA     | NA                                                                | -1.53 | 0.58 | 0.17 |
| A_51_P125183 | NM_026504 | Coq5       | 52064  | coenzyme Q5 homolog, methyltransferase (yeast)                    | -1.37 | 0.58 | 0.33 |
| A_52_P724015 | AI508575  | NA         | NA     | NA                                                                | -1.72 | 0.58 | 0.07 |
| A_51_P159673 | NM_019727 | Snx1       | 56440  | sorting nexin 1                                                   | -1.56 | 0.58 | 0.15 |
| A_51_P339154 | NM_146058 | NA         | NA     | NA                                                                | -1.54 | 0.58 | 0.16 |
| A_52_P747671 | AK085431  | NA         | NA     | NA                                                                | -1.93 | 0.58 | 0.03 |
| A_52_P214976 | AK031369  | NA         | NA     | NA                                                                | -1.64 | 0.58 | 0.11 |
| A_51_P138923 | NM_013788 | Peg12      | 27412  | paternally expressed 12                                           | -1.43 | 0.58 | 0.24 |
| A_51_P457430 | NM_172960 | Adck5      | 268822 | aarF domain containing kinase 5                                   | -1.39 | 0.58 | 0.30 |
| A_52_P202259 | NM_198299 | E130303B0  | 102124 | RIKEN cDNA E130303B06 gene                                        | -2.07 | 0.58 | 0.02 |
| A_51_P134262 | NM_028539 | NA         | NA     | NA                                                                | -1.14 | 0.58 | 0.82 |
| A_51_P121652 | NM_026877 | Aspscr1    | 68938  | alveolar soft part sarcoma chromosome region, candidate 1 (human) | -1.61 | 0.58 | 0.13 |
| A_52_P971150 | AK008679  | Nr4a2      | 18227  | nuclear receptor subfamily 4, group A, member 2                   | -1.83 | 0.58 | 0.04 |
| A_52_P427449 | NM_018832 | Magix      | 54634  | MAGI family member, X-linked                                      | -1.73 | 0.58 | 0.07 |
| A_52_P69043  | NM_025937 | Nkap       | 67050  | NFKB activating protein                                           | -1.33 | 0.58 | 0.37 |
| A_52_P34031  | NM_029331 | 1700019G17 | 175541 | RIKEN cDNA 1700019G17 gene                                        | -1.16 | 0.58 | 0.77 |
| A_51_P122226 | NM_025657 | Lrrc57     | 66606  | leucine rich repeat containing 57                                 | -1.26 | 0.58 | 0.53 |
| A_51_P515482 | NM_019817 | Copz1      | 56447  | coatomer protein complex, subunit zeta 1                          | -1.70 | 0.58 | 0.09 |
| A_52_P8444   | NM_153177 | Eif2c4     | 76850  | eukaryotic translation initiation factor 2C, 4                    | -1.69 | 0.58 | 0.09 |
| A_52_P239645 | BC059053  | Papd5      | 214627 | PAP associated domain containing 5                                | -1.75 | 0.58 | 0.07 |
| A_52_P644690 | AK041146  | NA         | NA     | NA                                                                | -2.05 | 0.58 | 0.02 |
| A_51_P167452 | AK049330  | Snap47     | 67826  | synaptosomal-associated protein, 47                               | -1.66 | 0.58 | 0.11 |
| A_52_P175699 | AK122261  | Mtmt3      | 74302  | myotubularin related protein 3                                    | -1.78 | 0.58 | 0.06 |
| A_51_P377789 | NM_009582 | Map3k12    | 26404  | mitogen-activated protein kinase kinase kinase 12                 | -2.00 | 0.58 | 0.02 |
| A_51_P288390 | NM_008837 | Pick1      | 18693  | protein interacting with C kinase 1                               | -1.73 | 0.58 | 0.07 |
| A_51_P151897 | BC059860  | R3hcc1     | 71843  | R3H domain and coiled-coil containing 1                           | -1.67 | 0.58 | 0.10 |
| A_51_P444874 | NM_008702 | Nlk        | 18099  | nemo like kinase                                                  | -1.58 | 0.58 | 0.15 |
| A_51_P356265 | NM_016845 | Acrbp      | 54137  | proacrosin binding protein                                        | -1.33 | 0.58 | 0.40 |
| A_51_P203022 | NM_026306 | Trmt112    | 67674  | tRNA methyltransferase 11-2 homolog ( <i>S. cerevisiae</i> )      | -2.30 | 0.58 | 0.01 |

|              |           |                 |        |                                                                                 |       |      |      |
|--------------|-----------|-----------------|--------|---------------------------------------------------------------------------------|-------|------|------|
| A_52_P389274 | AK019095  | Sfi1            | 78887  | Sfi1 homolog, spindle assembly associated (yeast)                               | -1.34 | 0.58 | 0.37 |
| A_52_P328492 | NM_001079 | Gas2l3          | 237436 | growth arrest-specific 2 like 3                                                 | -1.91 | 0.58 | 0.04 |
| A_52_P619138 | NM_011062 | Pdpk1           | 18607  | 3-phosphoinositide dependent protein kinase-1                                   | -1.48 | 0.58 | 0.20 |
| A_51_P490767 | NM_008439 | Khk             | 16548  | ketohexokinase                                                                  | -1.69 | 0.58 | 0.09 |
| A_52_P424650 | AK052336  | Sorbs2          | 234214 | sorbin and SH3 domain containing 2                                              | -1.98 | 0.58 | 0.03 |
| A_51_P336790 | NM_025520 | Lsm5            | 66373  | LSM5 homolog, U6 small nuclear RNA associated (S. cerevisiae)                   | -1.75 | 0.58 | 0.07 |
| A_52_P180842 | NM_177333 | Exoc3           | 211446 | exocyst complex component 3                                                     | -1.47 | 0.58 | 0.21 |
| A_51_P342652 | NM_008339 | Cd79b           | 15985  | CD79B antigen                                                                   | -1.53 | 0.58 | 0.17 |
| A_52_P300856 | AK034570  | D130020L0319760 |        | RIKEN cDNA D130020L05 gene                                                      | -1.65 | 0.58 | 0.11 |
| A_51_P215922 | NM_009811 | Casp6           | 12368  | caspase 6                                                                       | -1.22 | 0.58 | 0.58 |
| A_52_P611787 | NM_026183 | Slc47a1         | 67473  | solute carrier family 47, member 1                                              | -1.79 | 0.58 | 0.06 |
| A_51_P117618 | NM_023154 | Ethe1           | 66071  | ethylmalonic encephalopathy 1                                                   | -1.52 | 0.58 | 0.18 |
| A_52_P374351 | NM_053164 | Mrpl43          | 94067  | mitochondrial ribosomal protein L43                                             | -2.23 | 0.58 | 0.01 |
| A_51_P378545 | NM_028030 | Rbpms2          | 71973  | RNA binding protein with multiple splicing 2                                    | -1.71 | 0.58 | 0.09 |
| A_51_P476418 | BC057368  | Dock6           | 319899 | dedicator of cytokinesis 6                                                      | -1.52 | 0.58 | 0.18 |
| A_51_P408561 | NM_207219 | AI314976        | 106821 | expressed sequence AI314976                                                     | -2.17 | 0.58 | 0.01 |
| A_51_P511707 | NM_025636 | 2310079N066566  |        | RIKEN cDNA 2310079N02 gene                                                      | -2.04 | 0.58 | 0.02 |
| A_51_P345362 | NM_001003 | Arhgef11        | 213498 | Rho guanine nucleotide exchange factor (GEF) 11                                 | -1.45 | 0.58 | 0.22 |
| A_51_P290352 | AK140033  | AI452195        | 105178 | expressed sequence AI452195                                                     | -1.56 | 0.58 | 0.15 |
| A_51_P352245 | NM_018744 | Sema6a          | 20358  | sema domain, transmembrane domain (TM), and cytoplasmic domain, (semaphorin) 6A | -1.88 | 0.58 | 0.04 |
| A_52_P249920 | BC103777  | Zscan29         | 99334  | zinc finger SCAN domains 29                                                     | -1.72 | 0.58 | 0.07 |
| A_52_P163755 | NM_027658 | Hexim2          | 71059  | hexamethylene bis-acetamide inducible 2                                         | -1.45 | 0.58 | 0.22 |
| A_51_P281024 | NM_011237 | Rad9            | 19367  | RAD9 homolog (S. pombe)                                                         | -1.99 | 0.58 | 0.03 |
| A_52_P135495 | NA        | NA              | NA     | NA                                                                              | -1.82 | 0.58 | 0.05 |
| A_51_P215627 | NM_207229 | Plac9           | 211623 | placenta specific 9                                                             | -1.48 | 0.58 | 0.20 |
| A_51_P282930 | NM_011281 | Rorc            | 19885  | RAR-related orphan receptor gamma                                               | -1.48 | 0.58 | 0.20 |
| A_52_P69506  | NM_177566 | Arhgef15        | 442801 | Rho guanine nucleotide exchange factor (GEF) 15                                 | -1.70 | 0.58 | 0.09 |
| A_52_P134228 | NM_028185 | Lsm11           | 72290  | U7 snRNP-specific Sm-like protein LSM11                                         | -2.03 | 0.58 | 0.02 |
| A_52_P289835 | NM_183186 | Foxn3           | 71375  | forkhead box N3                                                                 | -1.51 | 0.58 | 0.20 |
| A_51_P436817 | NM_015761 | Dos             | 216164 | downstream of Stk11                                                             | -2.04 | 0.58 | 0.02 |
| A_51_P269549 | NM_031254 | Trem2           | 83433  | triggering receptor expressed on myeloid cells 2                                | -1.48 | 0.58 | 0.20 |



|              |           |           |        |                                                        |       |      |      |
|--------------|-----------|-----------|--------|--------------------------------------------------------|-------|------|------|
| A_51_P247665 | NM_178811 | Ttc15     | 217449 | tetratricopeptide repeat domain 15                     | -1.77 | 0.58 | 0.07 |
| A_51_P163778 | NM_027274 | NA        | NA     | NA                                                     | -1.87 | 0.58 | 0.04 |
| A_52_P397786 | AK033959  | Lpin2     | 64898  | lipin 2                                                | -1.44 | 0.58 | 0.24 |
| A_52_P20639  | NM_023727 | Rd3       | 74023  | retinal degeneration 3                                 | -1.36 | 0.58 | 0.34 |
| A_52_P338717 | NM_030064 | Phf23     | 78246  | PHD finger protein 23                                  | -1.82 | 0.58 | 0.05 |
|              |           |           |        | eukaryotic translation initiation factor 2B, subunit 4 |       |      |      |
| A_51_P424079 | NM_010122 | Eif2b4    | 13667  | delta                                                  | -1.79 | 0.58 | 0.06 |
| A_52_P484442 | NM_001037 | Zfp27     | 22689  | zinc finger protein 27                                 | -1.71 | 0.58 | 0.09 |
| A_51_P367843 | NM_026329 | Polr2g    | 67710  | polymerase (RNA) II (DNA directed) polypeptide G       | -1.51 | 0.58 | 0.18 |
| A_51_P308844 | NM_153529 | Nrn1      | 68404  | neuritin 1                                             | -1.34 | 0.58 | 0.37 |
| A_51_P442327 | NM_153406 | Cyt5a     | 74392  | cytospin A                                             | -1.94 | 0.58 | 0.03 |
| A_51_P394154 | NM_027156 | Ddx51     | 69663  | DEAD (Asp-Glu-Ala-Asp) box polypeptide 51              | -1.70 | 0.58 | 0.09 |
| A_52_P358097 | BC094565  | Fbxo10    | 269529 | F-box protein 10                                       | -1.15 | 0.58 | 0.77 |
| A_52_P589699 | BC053071  | Polr3a    | 218832 | polymerase (RNA) III (DNA directed) polypeptide A      | -1.75 | 0.58 | 0.07 |
| A_51_P303725 | NM_144534 | Tmem38a   | 74166  | transmembrane protein 38A                              | -1.45 | 0.58 | 0.22 |
| A_52_P494372 | NM_173002 | Zxdc      | 80292  | ZXD family zinc finger C                               | -1.13 | 0.58 | 0.86 |
| A_51_P153224 | NM_025428 | Zdhhc12   | 66220  | zinc finger, DHHC domain containing 12                 | -1.77 | 0.58 | 0.06 |
|              |           |           |        | glyceraldehyde-3-phosphate dehydrogenase               |       |      |      |
| A_52_P614417 | AK082178  | 3000002C1 | 378954 | pseudogene                                             | -1.64 | 0.58 | 0.11 |
| A_52_P285674 | NM_178764 | Fam168a   | 319604 | family with sequence similarity 168, member A          | -1.65 | 0.58 | 0.11 |
| A_51_P154668 | NM_001004 | NA        | NA     | NA                                                     | -1.82 | 0.58 | 0.05 |
| A_52_P563670 | NA        | NA        | NA     | NA                                                     | -1.40 | 0.58 | 0.28 |
| A_52_P114494 | AK149563  | Stat6     | 20852  | signal transducer and activator of transcription 6     | -1.71 | 0.58 | 0.07 |
| A_51_P297480 | NM_144491 | Dph1      | 116905 | DPH1 homolog ( <i>S. cerevisiae</i> )                  | -1.81 | 0.58 | 0.05 |
| A_51_P268953 | AK170682  | Tmem64    | 100201 | transmembrane protein 64                               | -1.79 | 0.58 | 0.06 |
| A_51_P111583 | NM_009319 | Tarbp2    | 21357  | TAR (HIV) RNA binding protein 2                        | -2.12 | 0.58 | 0.01 |
| A_52_P636752 | NM_020010 | Cyp51     | 13121  | cytochrome P450, family 51                             | -1.55 | 0.58 | 0.16 |
| A_51_P283151 | NM_028995 | Nipal3    | 74552  | NIPA-like domain containing 3                          | -1.20 | 0.58 | 0.67 |
| A_51_P247184 | NM_008728 | Npr3      | 18162  | natriuretic peptide receptor 3                         | -1.86 | 0.58 | 0.04 |
| A_51_P120239 | NM_008986 | Ptrf      | 19285  | polymerase I and transcript release factor             | -1.73 | 0.58 | 0.07 |
| A_52_P412529 | NM_020593 | Fbxo3     | 57443  | F-box protein 3                                        | -1.34 | 0.58 | 0.37 |
| A_52_P600531 | NM_001045 | Bahd1     | 228536 | bromo adjacent homology domain containing 1            | -1.76 | 0.58 | 0.07 |

|              |           |          |        |                                                                                                   |       |      |      |
|--------------|-----------|----------|--------|---------------------------------------------------------------------------------------------------|-------|------|------|
| A_51_P465232 | NM_139295 | Mcfd2    | 193813 | multiple coagulation factor deficiency 2                                                          | -1.60 | 0.58 | 0.14 |
| A_52_P658824 | NM_026283 | Samd8    | 67630  | sterile alpha motif domain containing 8                                                           | -1.46 | 0.58 | 0.21 |
| A_52_P399204 | AK090143  | Amdhd1   | 71761  | amidohydrolase domain containing 1                                                                | -1.49 | 0.58 | 0.20 |
| A_52_P367440 | NM_028774 | Rnf6     | 74132  | ring finger protein (C3H2C3 type) 6                                                               | -1.60 | 0.58 | 0.14 |
| A_51_P298052 | NM_153571 | Hscb     | 100900 | HscB iron-sulfur cluster co-chaperone homolog (E. coli)                                           | -1.46 | 0.58 | 0.21 |
| A_52_P538709 | NM_133932 | Tada3    | 101206 | transcriptional adaptor 3                                                                         | -1.90 | 0.58 | 0.04 |
| A_52_P55489  | NA        | NA       | NA     | NA                                                                                                | -1.20 | 0.58 | 0.61 |
| A_52_P585831 | NM_027088 | Bap1     | 104416 | Brca1 associated protein 1                                                                        | -1.78 | 0.58 | 0.06 |
| A_51_P417179 | NM_201230 | Fgfr1op  | 75296  | Fgfr1 oncogene partner                                                                            | -1.93 | 0.58 | 0.03 |
| A_51_P378298 | NM_026976 | Faim3    | 69169  | Fas apoptotic inhibitory molecule 3                                                               | -1.53 | 0.58 | 0.17 |
| A_51_P267454 | NM_024211 | Slc25a11 | 67863  | solute carrier family 25 (mitochondrial carrier oxoglutarate carrier), member 11                  | -1.79 | 0.58 | 0.06 |
| A_51_P203878 | NM_026556 | Dynll2   | 68097  | dynein light chain LC8-type 2                                                                     | -1.54 | 0.58 | 0.17 |
| A_52_P389230 | NM_198160 | Smarcc2  | 68094  | SWI/SNF related, matrix associated, actin dependent regulator of chromatin, subfamily c, member 2 | -1.37 | 0.58 | 0.33 |
| A_51_P326434 | NM_025827 | Lonp2    | 66887  | lon peptidase 2, peroxisomal                                                                      | -1.59 | 0.58 | 0.14 |
| A_52_P281879 | NM_011551 | Ubtf     | 21429  | upstream binding transcription factor, RNA polymerase I                                           | -1.85 | 0.58 | 0.04 |
| A_51_P395405 | BC057606  | Klhl5    | 71778  | kelch-like 5 (Drosophila)                                                                         | -1.14 | 0.58 | 0.82 |
| A_52_P620432 | AK019968  | Fam82b   | 66302  | family with sequence similarity 82, member B                                                      | -1.60 | 0.58 | 0.13 |
| A_52_P563617 | NM_133772 | Ssbp4    | 76900  | single stranded DNA binding protein 4                                                             | -1.65 | 0.58 | 0.11 |
| A_51_P266940 | NM_172414 | Fam164c  | 72350  | family with sequence similarity 164, member C                                                     | -1.68 | 0.58 | 0.10 |
| A_52_P368427 | NM_181569 | Mare     | 17168  | alpha globin regulatory element containing gene                                                   | -1.86 | 0.58 | 0.04 |
| A_51_P222033 | NM_178070 | Vps33b   | 233405 | vacuolar protein sorting 33B (yeast)                                                              | -1.91 | 0.58 | 0.04 |
| A_51_P115715 | NM_023049 | Asb2     | 65256  | ankyrin repeat and SOCS box-containing 2                                                          | -1.81 | 0.58 | 0.05 |
| A_51_P439326 | NM_146011 | Arhgap9  | 216445 | Rho GTPase activating protein 9                                                                   | -2.03 | 0.58 | 0.02 |
| A_51_P359603 | NM_013566 | Itgb7    | 16421  | integrin beta 7                                                                                   | -1.87 | 0.58 | 0.04 |
| A_51_P192344 | NM_011791 | Ash2l    | 23808  | ash2 (absent, small, or homeotic)-like (Drosophila)                                               | -1.90 | 0.57 | 0.04 |
| A_51_P226465 | NM_145579 | Mypop    | 232934 | Myb-related transcription factor, partner of profilin                                             | -1.72 | 0.57 | 0.07 |
| A_51_P107378 | NM_026067 | Eri1     | 67276  | exoribonuclease 1                                                                                 | -1.61 | 0.57 | 0.13 |

|              |           |           |        |                                                                                               |       |      |      |
|--------------|-----------|-----------|--------|-----------------------------------------------------------------------------------------------|-------|------|------|
| A_51_P244356 | NM_179203 | Atad3a    | 108888 | ATPase family, AAA domain containing 3A                                                       | -1.77 | 0.57 | 0.07 |
| A_52_P40191  | NM_021454 | Cdc42ep5  | 58804  | CDC42 effector protein (Rho GTPase binding) 5                                                 | -1.87 | 0.57 | 0.04 |
| A_52_P289213 | BX513654  | NA        | NA     | NA                                                                                            | -1.31 | 0.57 | 0.44 |
| A_52_P478729 | NM_194348 | Atg2a     | 329015 | ATG2 autophagy related 2 homolog A ( <i>S. cerevisiae</i> )                                   | -1.66 | 0.57 | 0.11 |
| A_51_P255441 | NM_053164 | Mrpl43    | 94067  | mitochondrial ribosomal protein L43                                                           | -2.21 | 0.57 | 0.01 |
| A_51_P223971 | NM_033476 | Tcfcp2    | 21422  | transcription factor CP2                                                                      | -1.25 | 0.57 | 0.53 |
| A_52_P80444  | NM_010073 | Dpm2      | 13481  | dolichol-phosphate (beta-D) mannosyltransferase 2                                             | -1.93 | 0.57 | 0.03 |
| A_51_P486668 | AK007954  | Uggt2     | 66435  | UDP-glucose glycoprotein glucosyltransferase 2                                                | -1.45 | 0.57 | 0.22 |
| A_52_P22446  | NM_033324 | Dgcr8     | 94223  | DiGeorge syndrome critical region gene 8                                                      | -1.69 | 0.57 | 0.09 |
| A_51_P462422 | NM_008124 | Gjb1      | 14618  | gap junction protein, beta 1                                                                  | -1.79 | 0.57 | 0.06 |
| A_51_P348764 | NM_023229 | Fastk     | 66587  | Fas-activated serine/threonine kinase                                                         | -1.78 | 0.57 | 0.06 |
| A_52_P346774 | AK053808  | Atp5a1    | 11946  | ATP synthase, H <sup>+</sup> transporting, mitochondrial F1 complex, alpha subunit, isoform 1 | -1.33 | 0.57 | 0.40 |
| A_51_P450123 | NM_053163 | Mrpl36    | 94066  | mitochondrial ribosomal protein L36                                                           | -1.87 | 0.57 | 0.04 |
| A_51_P408604 | NM_028115 | Trub1     | 72133  | TruB pseudouridine (psi) synthase homolog 1 ( <i>E. coli</i> )                                | -1.78 | 0.57 | 0.06 |
| A_51_P467889 | NM_025400 | Nat9      | 66176  | N-acetyltransferase 9 (GCN5-related, putative)                                                | -1.32 | 0.57 | 0.40 |
| A_51_P201254 | AK047739  | NA        | NA     | NA                                                                                            | -1.89 | 0.57 | 0.04 |
| A_52_P497534 | NM_145940 | Wipi1     | 52639  | WD repeat domain, phosphoinositide interacting 1                                              | -1.42 | 0.57 | 0.27 |
| A_52_P58066  | BB180072  | NA        | NA     | NA                                                                                            | -1.64 | 0.57 | 0.11 |
| A_51_P334504 | NM_212468 | Ssbp1     | 381760 | single-stranded DNA binding protein 1                                                         | -1.78 | 0.57 | 0.06 |
| A_52_P387458 | AJ293625  | 1810035L1 | 380773 | RIKEN cDNA 1810035L17 gene                                                                    | -1.64 | 0.57 | 0.11 |
| A_52_P835711 | AK043497  | NA        | NA     | NA                                                                                            | -1.67 | 0.57 | 0.10 |
| A_52_P476904 | BC059807  | Chd6      | 71389  | chromodomain helicase DNA binding protein 6                                                   | -2.01 | 0.57 | 0.02 |
| A_52_P931043 | AK088797  | NA        | NA     | NA                                                                                            | -1.61 | 0.57 | 0.13 |
| A_51_P472888 | NM_198299 | E130303B0 | 102124 | RIKEN cDNA E130303B06 gene                                                                    | -1.94 | 0.57 | 0.03 |
| A_52_P4937   | NM_010716 | Lig3      | 16882  | ligase III, DNA, ATP-dependent                                                                | -1.74 | 0.57 | 0.07 |
| A_52_P447985 | NM_023217 | Pgpep1    | 66522  | pyroglutamyl-peptidase I                                                                      | -1.95 | 0.57 | 0.03 |
| A_51_P302651 | NM_176979 | Topbp1    | 235559 | topoisomerase (DNA) II binding protein 1                                                      | -1.20 | 0.57 | 0.67 |
| A_51_P512205 | NM_001009 | Unc13d    | 70450  | unc-13 homolog D ( <i>C. elegans</i> )                                                        | -1.85 | 0.57 | 0.04 |
| A_51_P249909 | NM_010702 | Lect2     | 16841  | leukocyte cell-derived chemotaxin 2                                                           | -1.97 | 0.57 | 0.03 |

|              |           |                |        |                                                                                     |       |      |      |
|--------------|-----------|----------------|--------|-------------------------------------------------------------------------------------|-------|------|------|
| A_51_P484959 | NM_030566 | Rabep2         | 70314  | rabaptin, RAB GTPase binding effector protein 2                                     | -1.81 | 0.57 | 0.05 |
| A_51_P498257 | NM_025999 | Rnf141         | 67150  | ring finger protein 141                                                             | -1.68 | 0.57 | 0.10 |
| A_52_P480360 | NM_023595 | Dut            | 110074 | deoxyuridine triphosphatase                                                         | -1.36 | 0.57 | 0.33 |
| A_51_P188911 | NM_172693 | Galnt12        | 230145 | UDP-N-acetyl-alpha-D-galactosamine:polypeptide N-acetylgalactosaminyltransferase 12 | -1.54 | 0.57 | 0.16 |
| A_52_P632191 | NM_023739 | Nfx1           | 74164  | nuclear transcription factor, X-box binding 1                                       | -1.35 | 0.57 | 0.34 |
| A_52_P322364 | NM_133906 | Zkscan1        | 74570  | zinc finger with KRAB and SCAN domains 1                                            | -1.58 | 0.57 | 0.15 |
| A_51_P176524 | NM_019574 | Patz1          | 56218  | POZ (BTB) and AT hook containing zinc finger 1                                      | -1.86 | 0.57 | 0.04 |
| A_52_P574306 | NM_023114 | Apoc3          | 11814  | apolipoprotein C-III                                                                | -1.32 | 0.57 | 0.40 |
| A_51_P349888 | NM_007449 | Ang2           | 11731  | angiogenin, ribonuclease A family, member 2                                         | -1.09 | 0.57 | 0.97 |
| A_52_P222593 | AK003199  | 1110001A168554 |        | RIKEN cDNA 1110001A16 gene                                                          | -1.65 | 0.57 | 0.11 |
| A_51_P513041 | AK014639  | Dnajc1         | 13418  | Dnaj (Hsp40) homolog, subfamily C, member 1                                         | -2.15 | 0.57 | 0.01 |
| A_52_P804819 | NA        | NA             | NA     | NA                                                                                  | -1.87 | 0.57 | 0.04 |
| A_52_P400677 | NM_134067 | AW209491       | 105351 | expressed sequence AW209491                                                         | -1.68 | 0.57 | 0.10 |
| A_51_P163233 | NM_028814 | 2810403AC74200 |        | RIKEN cDNA 2810403A07 gene                                                          | -1.60 | 0.57 | 0.14 |
| A_52_P198780 | NM_023873 | Cep70          | 68121  | centrosomal protein 70                                                              | -2.33 | 0.57 | 0.01 |
| A_52_P613643 | NM_177565 | Zfp3           | 193043 | zinc finger protein 3                                                               | -1.76 | 0.57 | 0.07 |
| A_51_P317618 | NM_025795 | Ncaph2         | 52683  | non-SMC condensin II complex, subunit H2                                            | -1.93 | 0.57 | 0.03 |
| A_51_P378558 | NM_144911 | Rpap2          | 231571 | RNA polymerase II associated protein 2                                              | -1.66 | 0.57 | 0.11 |
| A_51_P304256 | NA        | NA             | NA     | NA                                                                                  | -1.55 | 0.57 | 0.16 |
| A_51_P378450 | NM_145480 | Rfc4           | 106344 | replication factor C (activator 1) 4                                                | -1.23 | 0.57 | 0.58 |
| A_52_P303841 | XM_986220 | Gm5296         | 384261 | predicted gene 5296                                                                 | -1.75 | 0.57 | 0.07 |
| A_51_P396752 | NM_024191 | Arl2bp         | 107566 | ADP-ribosylation factor-like 2 binding protein                                      | -1.22 | 0.57 | 0.58 |
| A_51_P188271 | NM_054042 | Cd248          | 70445  | CD248 antigen, endosialin                                                           | -1.18 | 0.57 | 0.70 |
| A_51_P274477 | AK138175  | Mipol1         | 73490  | mirror-image polydactyly gene 1 homolog (human)                                     | -1.76 | 0.57 | 0.07 |
| A_51_P148163 | NM_028020 | Cpsf3l         | 71957  | cleavage and polyadenylation specific factor 3-like                                 | -1.53 | 0.57 | 0.17 |
| A_52_P608132 | NM_001024 | Snx32          | 225861 | sorting nexin 32                                                                    | -1.59 | 0.57 | 0.14 |
| A_52_P389043 | NM_027933 | Ranbp3         | 71810  | RAN binding protein 3                                                               | -1.54 | 0.57 | 0.17 |
| A_52_P24951  | NM_001005 | Ado            | 211488 | 2-aminoethanethiol (cysteamine) dioxygenase                                         | -1.95 | 0.57 | 0.03 |
| A_51_P376454 | BI646741  | NA             | NA     | NA                                                                                  | -1.52 | 0.57 | 0.18 |
| A_51_P440892 | NM_026344 | Dph2           | 67728  | DPH2 homolog (S. cerevisiae)                                                        | -1.42 | 0.57 | 0.27 |

|              |           |           |        |                                                                    |       |      |      |
|--------------|-----------|-----------|--------|--------------------------------------------------------------------|-------|------|------|
| A_51_P314186 | NM_001079 | Syne1     | 64009  | synaptic nuclear envelope 1                                        | -1.37 | 0.57 | 0.33 |
| A_51_P514730 | NM_026615 | Urm1      | 68205  | ubiquitin related modifier 1 homolog ( <i>S. cerevisiae</i> )      | -1.97 | 0.57 | 0.03 |
| A_51_P126817 | NM_020580 | Th1l      | 57314  | TH1-like homolog ( <i>Drosophila</i> )                             | -2.11 | 0.57 | 0.01 |
| A_52_P357611 | NM_016720 | Neu3      | 50877  | neuraminidase 3                                                    | -1.89 | 0.57 | 0.04 |
| A_51_P454103 | NM_027288 | Manba     | 110173 | mannosidase, beta A, lysosomal                                     | -1.15 | 0.57 | 0.82 |
| A_52_P213220 | NA        | NA        | NA     | NA                                                                 | -1.56 | 0.57 | 0.15 |
| A_52_P583563 | AK083630  | Tom11l    | 71943  | target of myb1-like 1 (chicken)                                    | -2.03 | 0.57 | 0.02 |
| A_52_P869366 | BC029706  | Smcr7l    | 239555 | Smith-Magenis syndrome chromosome region, candidate 7-like (human) | -2.21 | 0.57 | 0.01 |
| A_51_P286865 | BC064745  | Wdr33     | 74320  | WD repeat domain 33                                                | -1.92 | 0.57 | 0.03 |
| A_51_P373402 | NM_026197 | Mett10d   | 67493  | methyltransferase 10 domain containing                             | -1.73 | 0.57 | 0.07 |
| A_51_P333159 | NM_026653 | Rpa1      | 68275  | replication protein A1                                             | -1.46 | 0.57 | 0.21 |
| A_52_P126111 | AK008852  | 1700113A1 | 176642 | RIKEN cDNA 1700113A16 gene                                         | -1.70 | 0.57 | 0.09 |
| A_51_P510106 | NM_178664 | B3gntl1   | 210004 | UDP-GlcNAc:betaGal beta-1,3-N-acetylglucosaminyltransferase-like 1 | -1.80 | 0.57 | 0.05 |
| A_51_P317321 | NM_001039 | Iffo1     | 320678 | intermediate filament family orphan 1                              | -1.59 | 0.57 | 0.14 |
| A_51_P364609 | NM_019699 | Fads2     | 56473  | fatty acid desaturase 2                                            | -2.11 | 0.57 | 0.01 |
| A_51_P347431 | NM_145415 | AA408296  | 215193 | expressed sequence AA408296                                        | -1.90 | 0.57 | 0.04 |
| A_51_P519108 | AK078087  | 6330439K1 | 241688 | RIKEN cDNA 6330439K17 gene                                         | -1.48 | 0.57 | 0.20 |
| A_51_P468398 | NM_175300 | Anapc2    | 99152  | anaphase promoting complex subunit 2                               | -1.97 | 0.57 | 0.03 |
| A_52_P649249 | NM_026858 | Xrcc6bp1  | 68876  | XRCC6 binding protein 1                                            | -2.04 | 0.57 | 0.02 |
| A_51_P356512 | NM_026139 | Armcx2    | 67416  | armadillo repeat containing, X-linked 2                            | -1.26 | 0.57 | 0.53 |
| A_51_P478279 | NM_053170 | Trim33    | 94093  | tripartite motif-containing 33                                     | -2.02 | 0.57 | 0.02 |
| A_52_P134023 | NM_153100 | Rtp3      | 235636 | receptor transporter protein 3                                     | -1.49 | 0.57 | 0.20 |
| A_52_P384392 | NM_023910 | Tsc22d4   | 78829  | TSC22 domain family, member 4                                      | -1.12 | 0.57 | 0.86 |
| A_52_P624284 | AK039665  | Taok3     | 330177 | TAO kinase 3                                                       | -1.72 | 0.57 | 0.07 |
| A_52_P487362 | NM_028980 | Ppp4r4    | 74521  | protein phosphatase 4, regulatory subunit 4                        | -1.80 | 0.57 | 0.05 |
| A_51_P502764 | NM_199198 | Hdac10    | 170787 | histone deacetylase 10                                             | -1.90 | 0.57 | 0.04 |
| A_52_P7554   | NM_010681 | Lama4     | 16775  | laminin, alpha 4                                                   | -1.68 | 0.57 | 0.10 |
| A_52_P636199 | NM_008017 | Smc2      | 14211  | structural maintenance of chromosomes 2                            | -1.72 | 0.57 | 0.07 |
| A_51_P382925 | NM_010175 | Fadd      | 14082  | Fas (TNFRSF6)-associated via death domain                          | -2.19 | 0.57 | 0.01 |
| A_51_P251737 | NM_001025 | DXBay18   | 574405 | DNA segment, Chr X, Baylor 18                                      | -1.51 | 0.57 | 0.18 |
| A_51_P235244 | AK129261  | Dnmbp     | 71972  | dynamamin binding protein                                          | -1.07 | 0.57 | 1.04 |

|              |           |                |        |                                                                                                            |       |      |      |
|--------------|-----------|----------------|--------|------------------------------------------------------------------------------------------------------------|-------|------|------|
| A_52_P276877 | AK049961  | NA             | NA     | NA                                                                                                         | -2.02 | 0.57 | 0.02 |
| A_51_P399985 | NM_015742 | Myo9b          | 17925  | myosin IXb                                                                                                 | -1.94 | 0.57 | 0.03 |
| A_51_P484030 | NM_010717 | Limk1          | 16885  | LIM-domain containing, protein kinase                                                                      | -1.77 | 0.57 | 0.06 |
| A_51_P427232 | NM_183088 | Scand3         | 71970  | SCAN domain containing 3                                                                                   | -1.39 | 0.57 | 0.28 |
| A_52_P119301 | XM_133692 | NA             | NA     | NA                                                                                                         | -1.53 | 0.57 | 0.17 |
| A_51_P216905 | NM_007438 | Aldoa          | 11674  | aldolase A, fructose-bisphosphate<br>protein phosphatase 2, regulatory subunit B (B56),<br>epsilon isoform | -2.06 | 0.57 | 0.02 |
| A_52_P154826 | NM_012024 | Ppp2r5e        | 26932  | epsilon isoform                                                                                            | -1.87 | 0.57 | 0.04 |
| A_51_P377856 | NM_133994 | Gstt3          | 103140 | glutathione S-transferase, theta 3                                                                         | -1.44 | 0.57 | 0.24 |
| A_51_P189105 | NA        | NA             | NA     | NA                                                                                                         | -1.72 | 0.57 | 0.07 |
| A_51_P509489 | NM_021284 | Kras           | 16653  | v-Ki-ras2 Kirsten rat sarcoma viral oncogene homolog                                                       | -1.99 | 0.57 | 0.03 |
| A_51_P275407 | NM_001033 | Phactr2        | 215789 | phosphatase and actin regulator 2                                                                          | -1.67 | 0.57 | 0.10 |
| A_51_P500760 | XM_994514 | Eid2b          | 434156 | EP300 interacting inhibitor of differentiation 2B                                                          | -2.16 | 0.57 | 0.01 |
| A_52_P307447 | NM_023290 | Mkrn2          | 67027  | makorin, ring finger protein, 2<br>aminoadipate-semialdehyde dehydrogenase-                                | -2.15 | 0.57 | 0.01 |
| A_52_P466907 | NM_026276 | Aasdhppt       | 67618  | phosphopantetheinyl transferase                                                                            | -2.17 | 0.57 | 0.01 |
| A_52_P215152 | NM_010636 | Klf12          | 16597  | Kruppel-like factor 12                                                                                     | -1.78 | 0.57 | 0.06 |
| A_52_P320711 | NM_009342 | Dynlt1b        | 21648  | dynein light chain Tctex-type 1D                                                                           | -1.29 | 0.57 | 0.46 |
| A_51_P190869 | BB307119  | NA             | NA     | NA                                                                                                         | -1.71 | 0.57 | 0.07 |
| A_51_P146953 | NM_133229 | Ripply3        | 170765 | rippy3 homolog (zebrafish)                                                                                 | -1.67 | 0.57 | 0.10 |
| A_52_P31246  | NM_013883 | Scmh1          | 29871  | sex comb on midleg homolog 1                                                                               | -1.96 | 0.57 | 0.03 |
| A_52_P276525 | NM_175207 | Ankrd9         | 74251  | ankyrin repeat domain 9                                                                                    | -1.58 | 0.57 | 0.15 |
| A_51_P128065 | NM_033573 | Prcc           | 94315  | papillary renal cell carcinoma (translocation-associated)                                                  | -1.66 | 0.57 | 0.11 |
| A_51_P232384 | NM_145566 | Agfg2          | 231801 | ArfGAP with FG repeats 2                                                                                   | -2.21 | 0.57 | 0.01 |
| A_52_P341708 | AK081879  | NA             | NA     | NA                                                                                                         | -1.62 | 0.57 | 0.12 |
| A_52_P376214 | NM_001037 | Cstf3          | 228410 | cleavage stimulation factor, 3' pre-RNA, subunit 3                                                         | -1.10 | 0.57 | 0.91 |
| A_52_P388898 | NM_028476 | 2610110G173242 |        | RIKEN cDNA 2610110G12 gene                                                                                 | -1.64 | 0.57 | 0.11 |
| A_52_P330540 | NM_025642 | 2610039C166578 |        | RIKEN cDNA 2610039C10 gene                                                                                 | -1.91 | 0.57 | 0.04 |
| A_51_P517672 | NM_178779 | Rnf152         | 320311 | ring finger protein 152                                                                                    | -1.50 | 0.57 | 0.20 |
| A_51_P426283 | NM_133347 | Dhx30          | 72831  | DEAH (Asp-Glu-Ala-His) box polypeptide 30<br>transmembrane protein 8 (five membrane-spanning<br>domains)   | -1.77 | 0.57 | 0.06 |
| A_52_P167382 | NM_021793 | Tmem8          | 60455  |                                                                                                            | -1.91 | 0.57 | 0.04 |

|              |           |           |        |                                                                                                             |       |      |      |
|--------------|-----------|-----------|--------|-------------------------------------------------------------------------------------------------------------|-------|------|------|
| A_52_P622355 | AK008145  | Igl-V1    | 16142  | immunoglobulin lambda chain, variable 1                                                                     | -1.33 | 0.57 | 0.40 |
| A_51_P398683 | NM_026555 | Rcn3      | 52377  | reticulocalbin 3, EF-hand calcium binding domain<br>oligonucleotide/oligosaccharide-binding fold containing | -1.56 | 0.57 | 0.15 |
| A_52_P210123 | NM_028696 | Obfc2a    | 109019 | 2A                                                                                                          | -1.30 | 0.57 | 0.44 |
| A_51_P387248 | NM_134135 | Slc39a3   | 106947 | solute carrier family 39 (zinc transporter), member 3                                                       | -2.14 | 0.57 | 0.01 |
| A_51_P406008 | NM_021555 | Brp16     | 59053  | brain protein 16                                                                                            | -1.67 | 0.57 | 0.10 |
| A_51_P219918 | NM_172383 | Tmem125   | 230678 | transmembrane protein 125                                                                                   | -1.50 | 0.57 | 0.20 |
| A_52_P324986 | NM_009275 | Srprb     | 20818  | signal recognition particle receptor, B subunit                                                             | -1.89 | 0.57 | 0.04 |
| A_51_P487228 | NM_172148 | B9d2      | 232987 | B9 protein domain 2                                                                                         | -1.46 | 0.57 | 0.21 |
| A_52_P303904 | XM_139295 | Card6     | 239319 | caspase recruitment domain family, member 6                                                                 | -1.91 | 0.57 | 0.04 |
| A_51_P485220 | NM_173185 | Csnk1g1   | 214897 | casein kinase 1, gamma 1                                                                                    | -1.70 | 0.57 | 0.09 |
| A_51_P492446 | NM_172401 | 1110057K0 | 68832  | RIKEN cDNA 1110057K04 gene                                                                                  | -1.74 | 0.57 | 0.07 |
| A_51_P336721 | NM_025372 | Tipin     | 66131  | timeless interacting protein<br>core-binding factor, runt domain, alpha subunit 2,                          | -1.52 | 0.57 | 0.18 |
| A_52_P279712 | NM_172860 | Cbfa2t2   | 12396  | translocated to, 2 (human)                                                                                  | -2.17 | 0.57 | 0.01 |
| A_51_P295389 | BC047275  | Chpf2     | 100910 | chondroitin polymerizing factor 2                                                                           | -1.36 | 0.57 | 0.33 |
| A_52_P521882 | NM_026812 | Hddc3     | 68695  | HD domain containing 3                                                                                      | -1.61 | 0.57 | 0.13 |
| A_51_P185229 | NM_007553 | Bmp2      | 12156  | bone morphogenetic protein 2                                                                                | -1.52 | 0.57 | 0.18 |
| A_52_P448805 | AK007094  | 1700096K1 | 73571  | RIKEN cDNA 1700096K18 gene                                                                                  | -1.56 | 0.57 | 0.15 |
| A_51_P337230 | NM_027864 | Galnt14   | 71685  | UDP-N-acetyl-alpha-D-galactosamine:polypeptide N-<br>acetylgalactosaminyltransferase 14                     | -1.08 | 0.57 | 0.97 |
| A_51_P258894 | NM_018763 | Chst2     | 54371  | carbohydrate sulfotransferase 2                                                                             | -1.83 | 0.57 | 0.05 |
| A_51_P465871 | NM_021448 | Elp2      | 58523  | elongation protein 2 homolog ( <i>S. cerevisiae</i> )                                                       | -2.09 | 0.57 | 0.02 |
| A_51_P158425 | NM_144893 | Slc35c2   | 228875 | solute carrier family 35, member C2                                                                         | -1.59 | 0.57 | 0.14 |
| A_52_P92514  | AK171787  | Fam48a    | 56790  | family with sequence similarity 48, member A                                                                | -1.58 | 0.57 | 0.15 |
| A_51_P228218 | AK020571  | NA        | NA     | NA                                                                                                          | -1.56 | 0.57 | 0.15 |
| A_52_P439001 | NA        | NA        | NA     | NA                                                                                                          | -1.77 | 0.57 | 0.06 |
| A_51_P282227 | NM_020577 | As3mt     | 57344  | arsenic (+3 oxidation state) methyltransferase                                                              | -1.45 | 0.57 | 0.22 |
| A_51_P233788 | NM_023178 | Dmap1     | 66233  | DNA methyltransferase 1-associated protein 1                                                                | -2.18 | 0.57 | 0.01 |
| A_51_P445473 | NM_013524 | Fut7      | 14347  | fucosyltransferase 7                                                                                        | -1.83 | 0.57 | 0.05 |
| A_52_P335354 | NM_001079 | Gas2l3    | 237436 | growth arrest-specific 2 like 3                                                                             | -2.05 | 0.57 | 0.02 |

|               |           |           |        |                                                           |       |      |      |
|---------------|-----------|-----------|--------|-----------------------------------------------------------|-------|------|------|
| A_52_P542204  | NM_027134 | Mtfmt     | 69606  | mitochondrial methionyl-tRNA formyltransferase            | -1.73 | 0.57 | 0.07 |
| A_52_P683728  | NM_175029 | Atg4c     | 242557 | autophagy-related 4C (yeast)                              | -1.20 | 0.57 | 0.61 |
| A_52_P932813  | AK140658  | NA        | NA     | NA                                                        | -1.92 | 0.57 | 0.04 |
| A_51_P152489  | NM_026388 | Tprgl     | 67808  | transformation related protein 63 regulated like          | -1.53 | 0.57 | 0.17 |
| A_52_P598714  | NM_054070 | Afg3l1    | 114896 | AFG3(ATPase family gene 3)-like 1 (yeast)                 | -1.46 | 0.57 | 0.22 |
| A_52_P165497  | NM_011385 | Ski       | 20481  | ski sarcoma viral oncogene homolog (avian)                | -1.15 | 0.57 | 0.82 |
| A_52_P1107697 | AK031731  | 6030499A1 | 1E+08  | RIKEN cDNA 6030499A19 gene                                | -1.71 | 0.57 | 0.07 |
| A_52_P578347  | NM_026799 | Rnasen    | 14000  | ribonuclease III, nuclear                                 | -1.85 | 0.57 | 0.04 |
| A_52_P483900  | NA        | NA        | NA     | NA                                                        | -1.67 | 0.57 | 0.10 |
|               |           |           |        | ubiquitin-like, containing PHD and RING finger domains    |       |      |      |
| A_51_P141772  | NM_144873 | Uhrf2     | 109113 | 2                                                         | -1.89 | 0.57 | 0.04 |
| A_52_P355057  | NM_021322 | Wdr4      | 57773  | WD repeat domain 4                                        | -2.04 | 0.57 | 0.02 |
| A_52_P378084  | XR_002675 | NA        | NA     | NA                                                        | -1.39 | 0.57 | 0.30 |
|               |           |           |        | NIMA (never in mitosis gene a)-related expressed kinase   |       |      |      |
| A_52_P440627  | AK173292  | Nek1      | 18004  | 1                                                         | -1.86 | 0.56 | 0.04 |
| A_51_P370099  | NM_008808 | Pdgfa     | 18590  | platelet derived growth factor, alpha                     | -1.94 | 0.56 | 0.03 |
| A_51_P176522  | AB029397  | Patz1     | 56218  | POZ (BTB) and AT hook containing zinc finger 1            | -1.88 | 0.56 | 0.04 |
| A_51_P217382  | AK173007  | Kif1c     | 16562  | kinesin family member 1C                                  | -2.02 | 0.56 | 0.02 |
| A_51_P491150  | AK143086  | Klhl25    | 207952 | kelch-like 25 (Drosophila)                                | -1.79 | 0.56 | 0.06 |
| A_51_P147850  | NM_010402 | Hand2     | 15111  | heart and neural crest derivatives expressed transcript 2 | -1.51 | 0.56 | 0.18 |
| A_51_P382700  | AK076604  | 2900005J1 | 67261  | RIKEN cDNA 2900005J15 gene                                | -2.17 | 0.56 | 0.01 |
| A_51_P398435  | NM_146191 | Lrrk1     | 233328 | leucine-rich repeat kinase 1                              | -1.41 | 0.56 | 0.27 |
|               |           |           |        | methylthioribose-1-phosphate isomerase homolog (S.        |       |      |      |
| A_52_P367791  | NM_026423 | Mri1      | 67873  | cerevisiae)                                               | -1.39 | 0.56 | 0.30 |
| A_52_P680856  | NM_009274 | Srpk2     | 20817  | serine/arginine-rich protein specific kinase 2            | -1.77 | 0.56 | 0.06 |
| A_52_P559066  | AK145690  | Aim1l     | 230806 | absent in melanoma 1-like                                 | -1.19 | 0.56 | 0.67 |
| A_51_P157406  | NM_008963 | Ptgds     | 19215  | prostaglandin D2 synthase (brain)                         | -1.39 | 0.56 | 0.30 |
| A_51_P252859  | NM_010516 | Cyr61     | 16007  | cysteine rich protein 61                                  | -1.17 | 0.56 | 0.70 |
| A_51_P388158  | NM_018749 | Eif3d     | 55944  | eukaryotic translation initiation factor 3, subunit D     | -1.87 | 0.56 | 0.04 |
| A_51_P386585  | NM_153410 | Gpsm1     | 67839  | G-protein signalling modulator 1 (AGS3-like, C. elegans)  | -1.81 | 0.56 | 0.05 |



|               |           |           |        |                                                                                                                         |       |      |      |
|---------------|-----------|-----------|--------|-------------------------------------------------------------------------------------------------------------------------|-------|------|------|
| A_52_P497085  | NM_172620 | Vps52     | 224705 | vacuolar protein sorting 52 (yeast)                                                                                     | -1.78 | 0.56 | 0.06 |
| A_51_P442481  | NM_019805 | Anapc7    | 56317  | anaphase promoting complex subunit 7                                                                                    | -2.22 | 0.56 | 0.01 |
| A_51_P246146  | NM_133714 | 231003712 | 69612  | RIKEN cDNA 2310037124 gene                                                                                              | -2.08 | 0.56 | 0.02 |
| A_51_P430071  | NM_178214 | Hist2h2be | 319190 | histone cluster 2, H2be                                                                                                 | -1.62 | 0.56 | 0.12 |
| A_51_P457989  | NM_027491 | Rragd     | 52187  | Ras-related GTP binding D<br>par-6 (partitioning defective 6) homolog beta (C.<br>elegans)                              | -2.23 | 0.56 | 0.01 |
| A_52_P455764  | BC025147  | Pard6b    | 58220  | Rho GTPase activating protein 24                                                                                        | -1.69 | 0.56 | 0.09 |
| A_51_P199725  | NM_146161 | Arhgap24  | 231532 | RIKEN cDNA 9330151L19 gene                                                                                              | -1.74 | 0.56 | 0.07 |
| A_51_P120066  | AK161156  | 9330151L1 | 414085 |                                                                                                                         | -1.13 | 0.56 | 0.86 |
| A_52_P459276  | NM_009879 | lft81     | 12589  | intraflagellar transport 81 homolog (Chlamydomonas)                                                                     | -2.23 | 0.56 | 0.01 |
| A_52_P231410  | AK029412  | Polr3e    | 26939  | polymerase (RNA) III (DNA directed) polypeptide E<br>general transcription factor II E, polypeptide 2 (beta<br>subunit) | -1.12 | 0.56 | 0.86 |
| A_51_P404353  | NM_026584 | Gtf2e2    | 68153  | predicted gene 4532                                                                                                     | -1.59 | 0.56 | 0.14 |
| A_52_P1082736 | AK011173  | Gm4532    | 1E+08  | NA                                                                                                                      | -1.94 | 0.56 | 0.03 |
| A_51_P147056  | BF138649  | NA        | NA     | NA                                                                                                                      | -1.41 | 0.56 | 0.27 |
| A_51_P494675  | NM_028071 | Cotl1     | 72042  | coactosin-like 1 (Dictyostelium)                                                                                        | -1.55 | 0.56 | 0.16 |
| A_52_P262428  | AK122343  | Fkbp15    | 338355 | FK506 binding protein 15<br>excision repair cross-complementing rodent repair<br>deficiency, complementation group 4    | -1.75 | 0.56 | 0.07 |
| A_51_P210082  | NM_015769 | Ercc4     | 50505  | Meis homeobox 2                                                                                                         | -2.02 | 0.56 | 0.02 |
| A_51_P422429  | NM_010825 | Meis2     | 17536  | DNA fragmentation factor, alpha subunit<br>Kell blood group precursor (McLeod phenotype)                                | -1.97 | 0.56 | 0.03 |
| A_52_P586539  | NM_001025 | Dffa      | 13347  | homolog                                                                                                                 | -2.15 | 0.56 | 0.01 |
| A_52_P6828    | BC054851  | Xk        | 22439  | CDK5 and Abl enzyme substrate 2                                                                                         | -2.05 | 0.56 | 0.02 |
| A_52_P380124  | NM_145851 | Cables2   | 252966 | zinc finger with KRAB and SCAN domains 1                                                                                | -1.90 | 0.56 | 0.04 |
| A_51_P190572  | NM_133906 | Zkscan1   | 74570  | solute carrier family 25 (mitochondrial carrier,<br>phosphate carrier), member 3                                        | -1.76 | 0.56 | 0.07 |
| A_52_P299231  | AK028313  | Slc25a3   | 18674  | microtubule-associated protein tau                                                                                      | -1.54 | 0.56 | 0.16 |
| A_51_P476689  | NM_001038 | Mapt      | 17762  | BCL2 modifying factor                                                                                                   | -1.70 | 0.56 | 0.09 |
| A_52_P78830   | NM_138313 | Bmf       | 171543 | adrenergic receptor, alpha 1b                                                                                           | -2.06 | 0.56 | 0.02 |
| A_52_P639048  | NM_007416 | Adra1b    | 11548  | heat shock factor binding protein 1                                                                                     | -1.66 | 0.56 | 0.11 |
| A_51_P325624  | NM_024219 | Hsbp1     | 68196  | annexin A6                                                                                                              | -2.16 | 0.56 | 0.01 |
| A_52_P434670  | AK077843  | Anxa6     | 11749  |                                                                                                                         | -1.46 | 0.56 | 0.22 |

|              |           |          |        |                                                                          |       |      |      |
|--------------|-----------|----------|--------|--------------------------------------------------------------------------|-------|------|------|
| A_51_P516625 | NM_008090 | Gata2    | 14461  | GATA binding protein 2                                                   | -1.98 | 0.56 | 0.03 |
| A_51_P499755 | NM_009672 | Anp32a   | 11737  | acidic (leucine-rich) nuclear phosphoprotein 32 family, member A         | -1.27 | 0.56 | 0.50 |
| A_51_P223891 | AK011097  | Ttc30b   | 72421  | tetratricopeptide repeat domain 30B                                      | -1.48 | 0.56 | 0.20 |
| A_51_P290626 | NM_178747 | Gulo     | 268756 | gulonolactone (L-) oxidase                                               | -2.01 | 0.56 | 0.02 |
| A_52_P492901 | NM_009294 | Stx4a    | 20909  | syntaxin 4A (placental)                                                  | -1.93 | 0.56 | 0.03 |
| A_51_P187665 | NM_028904 | Rmi1     | 74386  | RMI1, RecQ mediated genome instability 1, homolog (S. cerevisiae)        | -1.97 | 0.56 | 0.03 |
| A_52_P413661 | BC079861  | Mlh3     | 217716 | mutL homolog 3 (E coli)                                                  | -1.75 | 0.56 | 0.07 |
| A_51_P108731 | NM_145632 | Polr2h   | 245841 | polymerase (RNA) II (DNA directed) polypeptide H                         | -1.67 | 0.56 | 0.10 |
| A_51_P188108 | NM_008480 | Lama1    | 16772  | laminin, alpha 1                                                         | -1.70 | 0.56 | 0.09 |
| A_52_P110068 | NM_021383 | Rqcd1    | 58184  | rcd1 (required for cell differentiation) homolog 1 (S. pombe)            | -2.11 | 0.56 | 0.01 |
| A_52_P516394 | NA        | NA       | NA     | NA                                                                       | -1.79 | 0.56 | 0.06 |
| A_51_P193524 | NM_025876 | Cdk5rap1 | 66971  | CDK5 regulatory subunit associated protein 1                             | -1.63 | 0.56 | 0.12 |
| A_52_P325428 | BC039910  | Ankzf1   | 52231  | ankyrin repeat and zinc finger domain containing 1                       | -2.03 | 0.56 | 0.02 |
| A_52_P505143 | NM_008415 | Jrk      | 16469  | jerky                                                                    | -1.63 | 0.56 | 0.12 |
| A_51_P309988 | NM_147217 | Gprc5c   | 70355  | G protein-coupled receptor, family C, group 5, member C                  | -1.84 | 0.56 | 0.04 |
| A_52_P371705 | NM_027351 | Ppil3    | 70225  | peptidylprolyl isomerase (cyclophilin)-like 3                            | -2.19 | 0.56 | 0.01 |
| A_52_P164310 | NM_134044 | AI413782 | 104799 | expressed sequence AI413782                                              | -1.63 | 0.56 | 0.12 |
| A_51_P385043 | NM_178384 | Zfp74    | 72723  | zinc finger protein 74                                                   | -1.92 | 0.56 | 0.03 |
| A_52_P594430 | NM_028301 | Anks3    | 72615  | ankyrin repeat and sterile alpha motif domain containing 3               | -1.86 | 0.56 | 0.04 |
| A_52_P851171 | AK036477  | NA       | NA     | NA                                                                       | -1.41 | 0.56 | 0.27 |
| A_51_P417876 | NM_144918 | Smyd5    | 232187 | SET and MYND domain containing 5                                         | -1.66 | 0.56 | 0.11 |
| A_51_P256623 | NM_013629 | Phtf1    | 18685  | putative homeodomain transcription factor 1                              | -1.68 | 0.56 | 0.09 |
| A_52_P596112 | AK038934  | Mafg     | 17134  | v-maf musculoaponeurotic fibrosarcoma oncogene family, protein G (avian) | -1.62 | 0.56 | 0.13 |
| A_51_P148196 | NM_009143 | Sdf2     | 20316  | stromal cell derived factor 2                                            | -1.79 | 0.56 | 0.06 |
| A_51_P163694 | NM_172557 | Rufy1    | 216724 | RUN and FYVE domain containing 1                                         | -1.40 | 0.56 | 0.28 |
| A_51_P242446 | NM_177758 | Zscan20  | 269585 | zinc finger and SCAN domains 20                                          | -1.75 | 0.56 | 0.07 |

|              |           |            |        |                                                                           |       |      |      |
|--------------|-----------|------------|--------|---------------------------------------------------------------------------|-------|------|------|
| A_51_P506250 | NM_026035 | Mrpl55     | 67212  | mitochondrial ribosomal protein L55                                       | -1.50 | 0.56 | 0.20 |
| A_51_P204831 | M13018    | Crip1      | 12925  | cysteine-rich protein 1 (intestinal)                                      | -1.32 | 0.56 | 0.40 |
| A_51_P336827 | NM_025558 | Cyb5b      | 66427  | cytochrome b5 type B                                                      | -1.64 | 0.56 | 0.11 |
| A_52_P413348 | NM_029389 | Fam35a     | 75698  | family with sequence similarity 35, member A                              | -1.20 | 0.56 | 0.61 |
| A_51_P335583 | NM_172561 | Spag7      | 216873 | sperm associated antigen 7                                                | -1.73 | 0.56 | 0.07 |
| A_51_P418081 | AK035477  | 9530053J1! | 53961  | RIKEN cDNA 9530053J19 gene                                                | -1.43 | 0.56 | 0.24 |
| A_52_P25141  | NM_019432 | Tmem37     | 170706 | transmembrane protein 37                                                  | -1.85 | 0.56 | 0.04 |
| A_51_P432883 | NM_028076 | Tmub2      | 72053  | transmembrane and ubiquitin-like domain containing 2                      | -1.94 | 0.56 | 0.03 |
| A_51_P354652 | NM_026232 | Slc25a30   | 67554  | solute carrier family 25, member 30                                       | -1.11 | 0.56 | 0.91 |
| A_51_P346104 | NM_024499 | Sgta       | 52551  | small glutamine-rich tetratricopeptide repeat (TPR)-<br>containing, alpha | -1.56 | 0.56 | 0.15 |
| A_51_P305213 | XM_286373 | 1810010H2  | 69066  | RIKEN cDNA 1810010H24 gene                                                | -1.69 | 0.56 | 0.09 |
| A_51_P142896 | NM_007652 | Cd59a      | 12509  | CD59a antigen                                                             | -1.78 | 0.56 | 0.06 |
| A_51_P392090 | NM_133683 | Tmem19     | 67226  | transmembrane protein 19                                                  | -1.73 | 0.56 | 0.07 |
| A_51_P322220 | NM_029752 | Bri3bp     | 76809  | Bri3 binding protein                                                      | -1.63 | 0.56 | 0.11 |
| A_51_P191519 | AB031550  | Stard10    | 56018  | START domain containing 10                                                | -2.19 | 0.56 | 0.01 |
| A_51_P366138 | NM_008587 | Mertk      | 17289  | c-mer proto-oncogene tyrosine kinase                                      | -1.42 | 0.56 | 0.27 |
| A_51_P160372 | NM_016757 | Wbp1       | 22377  | WW domain binding protein 1                                               | -1.85 | 0.56 | 0.04 |
| A_52_P504787 | NM_010141 | Epha7      | 13841  | Eph receptor A7                                                           | -1.90 | 0.56 | 0.04 |
| A_51_P324410 | NM_016862 | Vti1a      | 53611  | vesicle transport through interaction with t-SNAREs<br>homolog 1A (yeast) | -1.96 | 0.56 | 0.03 |
| A_52_P482849 | XM_618787 | NA         | NA     | NA                                                                        | -1.66 | 0.56 | 0.11 |
| A_52_P69040  | NM_181040 | Atpaf1     | 230649 | ATP synthase mitochondrial F1 complex assembly factor<br>1                | -1.73 | 0.56 | 0.07 |
| A_51_P121236 | NM_022654 | Lrdd       | 57913  | leucine-rich and death domain containing                                  | -2.17 | 0.56 | 0.01 |
| A_52_P594290 | AK164078  | Wdfy2      | 268752 | WD repeat and FYVE domain containing 2                                    | -1.84 | 0.56 | 0.04 |
| A_51_P435366 | NM_010719 | Lipe       | 16890  | lipase, hormone sensitive                                                 | -1.96 | 0.56 | 0.03 |
| A_52_P15377  | NM_011719 | Wnt9b      | 22412  | wingless-type MMTV integration site 9B                                    | -1.74 | 0.56 | 0.07 |
| A_51_P476725 | AK017625  | Myl6b      | 216459 | myosin, light polypeptide 6B                                              | -1.89 | 0.56 | 0.04 |
| A_51_P220260 | NM_009343 | Phf1       | 21652  | PHD finger protein 1                                                      | -1.33 | 0.56 | 0.37 |
| A_51_P121288 | NM_021527 | Mkks       | 59030  | McKusick-Kaufman syndrome protein                                         | -1.76 | 0.56 | 0.07 |
| A_52_P406036 | NM_172407 | Cdkn2aip   | 70925  | CDKN2A interacting protein                                                | -1.67 | 0.56 | 0.10 |
| A_51_P413545 | NM_029582 | Txndc11    | 106200 | thioredoxin domain containing 11                                          | -1.36 | 0.56 | 0.33 |

|              |            |          |        |                                                              |       |      |      |
|--------------|------------|----------|--------|--------------------------------------------------------------|-------|------|------|
| A_52_P615958 | NA         | NA       | NA     | NA                                                           | -1.67 | 0.56 | 0.10 |
| A_52_P575668 | XM_0010038 | Gm9387   | 668831 | tetratricopeptide repeat domain 5 pseudogene                 | -1.51 | 0.56 | 0.18 |
| A_51_P242796 | NM_153126  | Nat10    | 98956  | N-acetyltransferase 10                                       | -1.73 | 0.56 | 0.07 |
| A_51_P415029 | NM_008715  | Ints6    | 18130  | integrator complex subunit 6                                 | -1.87 | 0.56 | 0.04 |
| A_52_P601914 | NM_146075  | Lemd2    | 224640 | LEM domain containing 2                                      | -2.09 | 0.56 | 0.02 |
| A_52_P672212 | NM_007591  | Calr     | 12317  | calreticulin                                                 | -1.93 | 0.56 | 0.03 |
| A_52_P425435 | NA         | NA       | NA     | NA                                                           | -2.25 | 0.56 | 0.01 |
| A_51_P212271 | NM_031998  | Tsga14   | 83922  | testis specific gene A14                                     | -2.05 | 0.56 | 0.02 |
| A_51_P262616 | BC072607   | Tbc1d30  | 74694  | TBC1 domain family, member 30                                | -1.83 | 0.56 | 0.05 |
| A_52_P462657 | AK139527   | Gm11545  | 217122 | predicted gene 11545                                         | -1.72 | 0.56 | 0.07 |
| A_51_P108573 | NM_175285  | Tmem62   | 96957  | transmembrane protein 62                                     | -1.58 | 0.56 | 0.15 |
| A_51_P286018 | NM_021454  | Cdc42ep5 | 58804  | CDC42 effector protein (Rho GTPase binding) 5                | -2.42 | 0.56 | 0.00 |
| A_51_P135379 | NM_025703  | Tceal8   | 66684  | transcription elongation factor A (SII)-like 8               | -1.77 | 0.56 | 0.06 |
| A_51_P241943 | BC051686   | Sap30l   | 50724  | SAP30-like                                                   | -2.05 | 0.56 | 0.02 |
| A_51_P297968 | NM_027959  | Pdia6    | 71853  | protein disulfide isomerase associated 6                     | -1.78 | 0.56 | 0.06 |
| A_51_P497692 | NM_023788  | Mageh1   | 75625  | melanoma antigen, family H, 1                                | -1.95 | 0.56 | 0.03 |
| A_52_P207635 | NM_001033  | Zfc3h1   | 216345 | zinc finger, C3H1-type containing                            | -1.57 | 0.56 | 0.15 |
| A_51_P450952 | AK029271   | 1110036O | 66180  | RIKEN cDNA 1110036O03 gene                                   | -1.61 | 0.56 | 0.13 |
| A_51_P121818 | NM_016781  | Prkag1   | 19082  | protein kinase, AMP-activated, gamma 1 non-catalytic subunit | -1.79 | 0.56 | 0.06 |
| A_52_P185568 | BC094676   | Wdr76    | 241627 | WD repeat domain 76                                          | -1.97 | 0.56 | 0.03 |
| A_51_P353814 | NM_153076  | Crygn    | 214301 | crystallin, gamma N                                          | -1.20 | 0.56 | 0.67 |
| A_51_P408537 | NM_009054  | Trim27   | 19720  | tripartite motif-containing 27                               | -2.04 | 0.56 | 0.02 |
| A_51_P321825 | NM_026445  | Sumf2    | 67902  | sulfatase modifying factor 2                                 | -1.94 | 0.56 | 0.03 |
| A_52_P440729 | AK035245   | Atf7ip   | 54343  | activating transcription factor 7 interacting protein        | -1.68 | 0.56 | 0.10 |
| A_51_P489503 | BC025832   | Notum    | 77583  | notum pectinacylesterase homolog (Drosophila)                | -1.70 | 0.56 | 0.09 |
| A_51_P304707 | NM_026465  | Prdxdd1  | 67939  | PrdX-deacylase domain 1                                      | -1.74 | 0.56 | 0.07 |
| A_51_P271665 | NM_011264  | Rev3l    | 19714  | REV3-like, catalytic subunit of DNA polymerase zeta          | -1.53 | 0.56 | 0.17 |
| A_51_P143721 | NM_134044  | AI413782 | 104799 | RAD54 like (S. cerevisiae)                                   | -1.58 | 0.56 | 0.15 |
| A_52_P259250 | NM_007964  | Evi5     | 14020  | expressed sequence AI413782                                  | -1.14 | 0.56 | 0.82 |
| A_51_P433778 | NM_009354  | Tert     | 21752  | ecotropic viral integration site 5                           | -1.83 | 0.56 | 0.04 |
|              |            |          |        | telomerase reverse transcriptase                             |       |      |      |

|              |           |                 |        |                                                                                 |       |      |      |
|--------------|-----------|-----------------|--------|---------------------------------------------------------------------------------|-------|------|------|
| A_52_P218568 | AK129091  | Phf16           | 382207 | PHD finger protein 16                                                           | -1.93 | 0.56 | 0.03 |
| A_51_P390334 | NA        | NA              | NA     | NA                                                                              | -1.45 | 0.56 | 0.22 |
| A_52_P37697  | NM_025575 | Sys1            | 66460  | SYS1 Golgi-localized integral membrane protein homolog ( <i>S. cerevisiae</i> ) | -2.00 | 0.56 | 0.02 |
| A_52_P384491 | NM_172573 | Engase          | 217364 | endo-beta-N-acetylglucosaminidase                                               | -1.66 | 0.56 | 0.11 |
| A_51_P358251 | AK154853  | 261002910:77032 |        | RIKEN cDNA 2610029101 gene                                                      | -1.85 | 0.56 | 0.04 |
| A_52_P631153 | AK084923  | C530043K1320715 |        | RIKEN cDNA C530043K16 gene                                                      | -1.63 | 0.56 | 0.12 |
| A_52_P282058 | NM_007739 | Col8a1          | 12837  | collagen, type VIII, alpha 1                                                    | -1.25 | 0.56 | 0.53 |
| A_52_P301223 | BC056618  | Brwd1           | 93871  | bromodomain and WD repeat domain containing 1                                   | -2.19 | 0.56 | 0.01 |
| A_51_P213205 | NM_133778 | Fam131a         | 78408  | family with sequence similarity 131, member A                                   | -1.76 | 0.56 | 0.07 |
| A_51_P314273 | X14206    | Parp1           | 11545  | poly (ADP-ribose) polymerase family, member 1                                   | -1.47 | 0.56 | 0.21 |
| A_52_P345078 | AK147993  | Wdr25           | 212198 | WD repeat domain 25                                                             | -1.49 | 0.56 | 0.20 |
| A_52_P534672 | AK080176  | Ppp4r1l         | 1E+08  | protein phosphatase 4, regulatory subunit 1-like                                | -1.94 | 0.56 | 0.03 |
| A_51_P178646 | NM_026308 | Rpp21           | 67676  | ribonuclease P 21 subunit (human)                                               | -1.74 | 0.56 | 0.07 |
| A_51_P314652 | NM_177130 | Glt28d2         | 320302 | glycosyltransferase 28 domain containing 2                                      | -1.54 | 0.55 | 0.16 |
| A_52_P279391 | AK030352  | Clock           | 12753  | circadian locomoter output cycles kaput                                         | -1.61 | 0.55 | 0.13 |
| A_51_P410927 | AK016980  | Gm9856          | 1E+08  | predicted gene 9856                                                             | -1.80 | 0.55 | 0.05 |
| A_51_P435363 | NM_010719 | Lipe            | 16890  | lipase, hormone sensitive                                                       | -1.94 | 0.55 | 0.03 |
| A_52_P414368 | NM_178715 | Tmem30b         | 238257 | transmembrane protein 30B                                                       | -1.50 | 0.55 | 0.20 |
| A_52_P355276 | NM_001002 | Smg6            | 103677 | Smg-6 homolog, nonsense mediated mRNA decay factor ( <i>C. elegans</i> )        | -1.18 | 0.55 | 0.70 |
| A_51_P481832 | NM_019519 | Rabggta         | 56187  | Rab geranylgeranyl transferase, a subunit                                       | -1.91 | 0.55 | 0.04 |
| A_51_P487918 | NM_177158 | Rinl            | 320435 | Ras and Rab interactor-like                                                     | -1.76 | 0.55 | 0.07 |
| A_51_P472588 | NM_001015 | Tyw1            | 100929 | tRNA-gammaW synthesizing protein 1 homolog ( <i>S. cerevisiae</i> )             | -1.97 | 0.55 | 0.03 |
| A_52_P422338 | NM_001039 | NA              | NA     | NA                                                                              | -1.88 | 0.55 | 0.04 |
| A_52_P496260 | NM_027148 | Exosc8          | 69639  | exosome component 8                                                             | -1.65 | 0.55 | 0.11 |
| A_52_P89267  | BC026208  | Gatsl2          | 80909  | GATS protein-like 2                                                             | -2.00 | 0.55 | 0.02 |
| A_52_P179925 | NM_026180 | Abcg8           | 67470  | ATP-binding cassette, sub-family G (WHITE), member 8                            | -1.89 | 0.55 | 0.04 |
| A_52_P305053 | NM_177163 | NA              | NA     | NA                                                                              | -2.04 | 0.55 | 0.02 |
| A_52_P340073 | NM_010111 | Efnb2           | 13642  | ephrin B2                                                                       | -1.99 | 0.55 | 0.03 |
| A_52_P266916 | NM_001025 | Otud7b          | 229603 | OTU domain containing 7B                                                        | -1.91 | 0.55 | 0.04 |

|              |           |           |        |                                                                                                                                     |       |      |      |
|--------------|-----------|-----------|--------|-------------------------------------------------------------------------------------------------------------------------------------|-------|------|------|
| A_51_P256093 | NM_011943 | Map2k6    | 26399  | mitogen-activated protein kinase kinase 6                                                                                           | -1.66 | 0.55 | 0.11 |
| A_52_P150565 | NM_138592 | Usp39     | 28035  | ubiquitin specific peptidase 39                                                                                                     | -1.83 | 0.55 | 0.04 |
| A_52_P674694 | NM_025999 | Rnf141    | 67150  | ring finger protein 141                                                                                                             | -1.57 | 0.55 | 0.15 |
| A_51_P138933 | NM_177741 | Ppp1r3b   | 244416 | protein phosphatase 1, regulatory (inhibitor) subunit 3B                                                                            | -1.11 | 0.55 | 0.91 |
| A_51_P329322 | NM_025512 | Zfand1    | 66361  | zinc finger, AN1-type domain 1                                                                                                      | -1.85 | 0.55 | 0.04 |
| A_51_P117777 | NM_016658 | Galt      | 14430  | galactose-1-phosphate uridyl transferase                                                                                            | -1.95 | 0.55 | 0.03 |
| A_51_P304125 | NM_007854 | Slc29a2   | 13340  | solute carrier family 29 (nucleoside transporters), member 2                                                                        | -2.12 | 0.55 | 0.01 |
| A_52_P268549 | NM_197981 | 593041611 | 72440  | RIKEN cDNA 5930416119 gene                                                                                                          | -1.62 | 0.55 | 0.12 |
| A_51_P400217 | NM_016982 | Vpreb1    | 22362  | pre-B lymphocyte gene 1                                                                                                             | -1.63 | 0.55 | 0.11 |
| A_51_P108778 | NM_023131 | Rce1      | 19671  | RCE1 homolog, prenyl protein peptidase ( <i>S. cerevisiae</i> ) X-ray repair complementing defective repair in Chinese              | -1.47 | 0.55 | 0.21 |
| A_52_P197772 | NM_020570 | Xrcc2     | 57434  | hamster cells 2                                                                                                                     | -1.96 | 0.55 | 0.03 |
| A_52_P69109  | NM_011387 | Slc10a1   | 20493  | solute carrier family 10 (sodium/bile acid cotransporter family), member 1                                                          | -1.34 | 0.55 | 0.37 |
| A_51_P293715 | NM_054071 | Fgfr1     | 116701 | fibroblast growth factor receptor-like 1                                                                                            | -2.10 | 0.55 | 0.01 |
| A_51_P513611 | NM_146078 | Ubr2      | 224826 | ubiquitin protein ligase E3 component n-recognin 2                                                                                  | -1.99 | 0.55 | 0.03 |
| A_51_P268145 | NM_019750 | Nat6      | 56441  | N-acetyltransferase 6                                                                                                               | -1.42 | 0.55 | 0.27 |
| A_52_P278354 | NM_007557 | Bmp7      | 12162  | bone morphogenetic protein 7                                                                                                        | -1.13 | 0.55 | 0.86 |
| A_52_P282279 | NM_138745 | Mthfd1    | 108156 | methylenetetrahydrofolate dehydrogenase (NADP+ dependent), methenyltetrahydrofolate cyclohydrolase, formyltetrahydrofolate synthase | -1.91 | 0.55 | 0.04 |
| A_52_P123315 | NM_175004 | Ptrh2     | 217057 | peptidyl-tRNA hydrolase 2                                                                                                           | -1.57 | 0.55 | 0.15 |
| A_51_P505689 | U92949    | Kifc2     | 16581  | kinesin family member C2                                                                                                            | -1.91 | 0.55 | 0.04 |
| A_52_P410529 | AK017332  | Pstk      | 214580 | phosphoserine-tRNA kinase                                                                                                           | -1.63 | 0.55 | 0.11 |
| A_51_P266847 | NM_144528 | Rnf126    | 70294  | ring finger protein 126                                                                                                             | -2.12 | 0.55 | 0.01 |
| A_52_P647582 | NM_008296 | Hsf1      | 15499  | heat shock factor 1                                                                                                                 | -1.82 | 0.55 | 0.05 |
| A_52_P257523 | XM_895981 | 1110065P2 | 68920  | RIKEN cDNA 1110065P20 gene                                                                                                          | -2.21 | 0.55 | 0.01 |
| A_52_P239052 | NM_011749 | Zfp148    | 22661  | zinc finger protein 148                                                                                                             | -1.38 | 0.55 | 0.33 |
| A_52_P375939 | AK029391  | Pex11c    | 69129  | peroxisomal biogenesis factor 11 gamma                                                                                              | -1.66 | 0.55 | 0.11 |
| A_52_P78684  | AK084765  | D330040H  | 320847 | RIKEN cDNA D330040H18 gene                                                                                                          | -1.64 | 0.55 | 0.11 |

|               |           |                 |        |                                                        |       |      |      |
|---------------|-----------|-----------------|--------|--------------------------------------------------------|-------|------|------|
|               |           |                 |        | protein phosphatase 1, regulatory (inhibitor) subunit  |       |      |      |
| A_52_P110157  | NM_033371 | Ppp1r16a        | 73062  | 16A                                                    | -2.16 | 0.55 | 0.01 |
| A_52_P53695   | NM_010629 | Kifap3          | 16579  | kinesin-associated protein 3                           | -1.74 | 0.55 | 0.07 |
| A_51_P155482  | NM_011132 | Pole            | 18973  | polymerase (DNA directed), epsilon                     | -1.79 | 0.55 | 0.06 |
| A_51_P182358  | NM_175665 | Hist1h2bk       | 319184 | histone cluster 1, H2bk                                | -1.53 | 0.55 | 0.17 |
| A_52_P97309   | NM_019757 | Fzr1            | 56371  | fizzy/cell division cycle 20 related 1 (Drosophila)    | -2.23 | 0.55 | 0.01 |
| A_52_P190527  | BC019948  | Gpatch8         | 237943 | G patch domain containing 8                            | -1.47 | 0.55 | 0.21 |
| A_52_P91823   | AK045070  | B130024G1434198 |        | RIKEN cDNA B130024G19 gene                             | -2.32 | 0.55 | 0.01 |
| A_52_P472771  | NM_023645 | Kdelc1          | 72050  | KDEL (Lys-Asp-Glu-Leu) containing 1                    | -2.05 | 0.55 | 0.02 |
| A_52_P574668  | NM_011851 | Nt5e            | 23959  | 5' nucleotidase, ecto                                  | -1.55 | 0.55 | 0.16 |
|               |           |                 |        | growth arrest and DNA-damage-inducible, gamma          |       |      |      |
| A_52_P85020   | NM_183358 | Gadd45gip       | 102060 | interacting protein 1                                  | -1.61 | 0.55 | 0.13 |
| A_52_P235003  | NA        | NA              | NA     | NA                                                     | -1.86 | 0.55 | 0.04 |
| A_51_P286814  | NM_011424 | Ncor2           | 20602  | nuclear receptor co-repressor 2                        | -1.71 | 0.55 | 0.07 |
| A_51_P370252  | NM_011796 | Capn10          | 23830  | calpain 10                                             | -2.29 | 0.55 | 0.01 |
| A_51_P220682  | NM_026501 | Fam134c         | 67998  | family with sequence similarity 134, member C          | -1.88 | 0.55 | 0.04 |
| A_52_P95544   | NM_001004 | Scarf1          | 380713 | scavenger receptor class F, member 1                   | -1.99 | 0.55 | 0.03 |
| A_52_P467861  | NM_001039 | Prhoxnb         | 231903 | parahox cluster neighbor                               | -1.85 | 0.55 | 0.04 |
| A_51_P296925  | AK052489  | Palld           | 72333  | palladin, cytoskeletal associated protein              | -1.39 | 0.55 | 0.28 |
| A_52_P326808  | NM_026875 | Ypel3           | 66090  | yippee-like 3 (Drosophila)                             | -2.06 | 0.55 | 0.02 |
| A_51_P312474  | NM_007459 | Ap2a2           | 11772  | adaptor protein complex AP-2, alpha 2 subunit          | -1.59 | 0.55 | 0.14 |
| A_51_P163173  | NM_028226 | Rbm12b          | 72397  | RNA binding motif protein 12B                          | -1.40 | 0.55 | 0.28 |
| A_52_P1004509 | NM_001033 | BC065397        | 436230 | cDNA sequence BC065397                                 | -1.67 | 0.55 | 0.10 |
| A_51_P356903  | NM_009274 | Srpk2           | 20817  | serine/arginine-rich protein specific kinase 2         | -1.83 | 0.55 | 0.04 |
| A_52_P460257  | NM_147201 | Nrbp1           | 192292 | nuclear receptor binding protein 1                     | -1.66 | 0.55 | 0.10 |
| A_51_P403636  | NM_001042 | Smad7           | 17131  | MAD homolog 7 (Drosophila)                             | -1.45 | 0.55 | 0.22 |
| A_52_P221776  | NM_010616 | Kif12           | 16552  | kinesin family member 12                               | -1.24 | 0.55 | 0.55 |
| A_52_P390918  | NM_019797 | Trip4           | 56404  | thyroid hormone receptor interactor 4                  | -2.04 | 0.55 | 0.02 |
| A_52_P537566  | NM_177150 | Cenpt           | 320394 | centromere protein T                                   | -1.77 | 0.55 | 0.06 |
|               |           |                 |        | RFad1, flavin adenine dinucleotide synthetase, homolog |       |      |      |
| A_52_P356703  | NM_177041 | Flad1           | 319945 | (yeast)                                                | -2.28 | 0.55 | 0.01 |
| A_52_P297803  | NM_010941 | Nsdhl           | 18194  | NAD(P) dependent steroid dehydrogenase-like            | -1.75 | 0.55 | 0.07 |
| A_51_P180724  | NM_026810 | Mlh1            | 17350  | mutL homolog 1 (E. coli)                               | -1.23 | 0.55 | 0.58 |
| A_51_P107243  | AK079264  | NA              | NA     | NA                                                     | -2.19 | 0.55 | 0.01 |

|               |           |           |        |                                                                                      |       |      |      |
|---------------|-----------|-----------|--------|--------------------------------------------------------------------------------------|-------|------|------|
| A_52_P249856  | NM_172274 | Cc2d2a    | 231214 | coiled-coil and C2 domain containing 2A                                              | -1.97 | 0.55 | 0.03 |
| A_52_P1172895 | AK082713  | C230094BC | 319347 | RIKEN cDNA C230094B09 gene<br>neural precursor cell expressed, developmentally down- | -1.90 | 0.55 | 0.04 |
| A_51_P315634  | NM_008682 | Nedd1     | 17997  | regulated gene 1                                                                     | -1.68 | 0.55 | 0.10 |
| A_52_P518014  | NM_015782 | Snrpa     | 53607  | small nuclear ribonucleoprotein polypeptide A                                        | -1.78 | 0.55 | 0.06 |
| A_51_P256653  | BC016110  | Lmbr1     | 56873  | limb region 1                                                                        | -1.86 | 0.55 | 0.04 |
| A_52_P40832   | AK147344  | Rab11fip4 | 268451 | RAB11 family interacting protein 4 (class II)                                        | -1.83 | 0.55 | 0.04 |
| A_51_P155550  | AK090371  | C78339    | 97863  | expressed sequence C78339                                                            | -1.82 | 0.55 | 0.05 |
| A_52_P587831  | NM_026538 | Ddx56     | 52513  | DEAD (Asp-Glu-Ala-Asp) box polypeptide 56                                            | -1.79 | 0.55 | 0.06 |
| A_51_P490692  | NM_027658 | Hexim2    | 71059  | hexamethylene bis-acetamide inducible 2                                              | -1.87 | 0.55 | 0.04 |
| A_52_P242973  | NM_019951 | Sec11a    | 56529  | SEC11 homolog A ( <i>S. cerevisiae</i> )                                             | -1.91 | 0.55 | 0.04 |
| A_52_P130490  | BC090402  | RP23-480B | 665433 | similar to histone 2a                                                                | -1.86 | 0.55 | 0.04 |
| A_51_P152155  | NM_029626 | Glt8d1    | 76485  | glycosyltransferase 8 domain containing 1                                            | -1.74 | 0.55 | 0.07 |
| A_51_P393078  | XM_144820 | NA        | NA     | NA                                                                                   | -1.90 | 0.55 | 0.04 |
| A_51_P113144  | AK167690  | Ap1s2     | 108012 | adaptor-related protein complex 1, sigma 2 subunit                                   | -2.17 | 0.55 | 0.01 |
| A_52_P418956  | NM_177858 | 4933431E2 | 329735 | RIKEN cDNA 4933431E20 gene                                                           | -2.15 | 0.55 | 0.01 |
| A_52_P515370  | AK168254  | Rit1      | 19769  | Ras-like without CAAX 1                                                              | -1.98 | 0.55 | 0.03 |
| A_51_P345867  | NM_011939 | Hsf4      | 26386  | heat shock transcription factor 4                                                    | -1.98 | 0.55 | 0.03 |
| A_51_P248444  | NM_172380 | Ktelc1    | 224143 | KTEL (Lys-Tyr-Glu-Leu) containing 1                                                  | -1.71 | 0.55 | 0.09 |
| A_51_P472726  | NM_145978 | Pdlim2    | 213019 | PDZ and LIM domain 2                                                                 | -1.47 | 0.55 | 0.21 |
| A_51_P239699  | AK021284  | Mll5      | 69188  | myeloid/lymphoid or mixed-lineage leukemia 5                                         | -1.93 | 0.55 | 0.03 |
| A_52_P33147   | AK086149  | Sox5      | 20678  | SRY-box containing gene 5                                                            | -1.62 | 0.55 | 0.12 |
| A_51_P483261  | NM_145145 | Pomt1     | 99011  | protein-O-mannosyltransferase 1                                                      | -1.88 | 0.55 | 0.04 |
| A_51_P453519  | NM_023740 | Zdhhc16   | 74168  | zinc finger, DHHC domain containing 16<br>methenyltetrahydrofolate synthetase domain | -2.28 | 0.55 | 0.01 |
| A_51_P511899  | NM_172761 | Mthfsd    | 234814 | containing                                                                           | -1.47 | 0.55 | 0.21 |
| A_51_P438865  | NM_025928 | Pmf1      | 67037  | polyamine-modulated factor 1<br>DNA segment, Chr 15, Wayne State University 169,     | -1.91 | 0.55 | 0.04 |
| A_52_P105151  | NM_198420 | D15Wsu16  | 223666 | expressed<br>v-erb-b2 erythroblastic leukemia viral oncogene                         | -1.80 | 0.55 | 0.05 |
| A_51_P414813  | NM_010153 | ErbB3     | 13867  | homolog 3 (avian)                                                                    | -2.29 | 0.55 | 0.01 |
| A_52_P475439  | NM_021791 | Doc2g     | 60425  | double C2, gamma                                                                     | -2.32 | 0.55 | 0.01 |
| A_52_P474368  | NA        | NA        | NA     | NA                                                                                   | -1.94 | 0.55 | 0.03 |



|               |           |           |        |                                                                                                   |       |      |      |
|---------------|-----------|-----------|--------|---------------------------------------------------------------------------------------------------|-------|------|------|
| A_51_P471520  | NM_021537 | Stk25     | 59041  | serine/threonine kinase 25 (yeast)                                                                | -1.18 | 0.55 | 0.70 |
| A_52_P279786  | AK050869  | Whsc1     | 107823 | Wolf-Hirschhorn syndrome candidate 1 (human)                                                      | -2.00 | 0.55 | 0.02 |
| A_51_P460710  | NM_172605 | Tdrd3     | 219249 | tudor domain containing 3                                                                         | -2.11 | 0.55 | 0.01 |
| A_51_P407311  | NM_145954 | Aldh16a1  | 69748  | aldehyde dehydrogenase 16 family, member A1                                                       | -2.28 | 0.55 | 0.01 |
| A_51_P320386  | NM_001025 | Pja2      | 224938 | praja 2, RING-H2 motif containing                                                                 | -1.56 | 0.55 | 0.15 |
| A_51_P185639  | NM_011213 | Ptprf     | 19268  | protein tyrosine phosphatase, receptor type, F                                                    | -2.31 | 0.55 | 0.01 |
| A_51_P226142  | AK131163  | Fam116a   | 211922 | family with sequence similarity 116, member A                                                     | -1.56 | 0.55 | 0.15 |
| A_52_P193104  | AK162552  | Dctn4     | 67665  | dynactin 4                                                                                        | -1.79 | 0.55 | 0.06 |
| A_52_P459288  | AK050350  | NA        | NA     | NA                                                                                                | -1.59 | 0.55 | 0.14 |
| A_52_P222815  | AK030036  | 4932416HC | 654409 | RIKEN cDNA 4932416H05 gene                                                                        | -2.13 | 0.55 | 0.01 |
| A_51_P367780  | NM_029981 | Adamtsl2  | 77794  | ADAMTS-like 2                                                                                     | -1.56 | 0.55 | 0.15 |
| A_52_P1085754 | BC079676  | 8430419L0 | 74525  | RIKEN cDNA 8430419L09 gene                                                                        | -1.75 | 0.55 | 0.07 |
| A_52_P612165  | NM_028227 | Brap      | 72399  | BRCA1 associated protein                                                                          | -1.69 | 0.55 | 0.09 |
| A_51_P448664  | NM_011539 | Tbxas1    | 21391  | thromboxane A synthase 1, platelet                                                                | -2.03 | 0.55 | 0.02 |
| A_51_P224630  | NM_026854 | Dtwd2     | 68857  | DTW domain containing 2                                                                           | -2.18 | 0.55 | 0.01 |
| A_51_P446112  | XM_895406 | 6430590AC | 619719 | RIKEN cDNA 6430590A07 gene                                                                        | -2.02 | 0.55 | 0.02 |
| A_51_P479733  | NM_011417 | Smarca4   | 20586  | SWI/SNF related, matrix associated, actin dependent regulator of chromatin, subfamily a, member 4 | -2.00 | 0.55 | 0.02 |
| A_51_P282297  | NM_001033 | Naa11     | 97243  | N(alpha)-acetyltransferase 11, NatA catalytic subunit                                             | -1.66 | 0.55 | 0.11 |
| A_52_P652513  | NM_027400 | Lman1     | 70361  | lectin, mannose-binding, 1                                                                        | -1.69 | 0.55 | 0.09 |
| A_51_P372912  | NM_011319 | Sars      | 20226  | seryl-aminoacyl-tRNA synthetase                                                                   | -2.03 | 0.55 | 0.02 |
| A_51_P427934  | XM_194337 | Megf8     | 269878 | multiple EGF-like-domains 8                                                                       | -1.66 | 0.55 | 0.11 |
| A_51_P207301  | AK037047  | NA        | NA     | NA                                                                                                | -1.55 | 0.55 | 0.16 |
| A_52_P175748  | NA        | NA        | NA     | NA                                                                                                | -2.04 | 0.55 | 0.02 |
| A_51_P148670  | NM_024437 | Nudt7     | 67528  | nudix (nucleoside diphosphate linked moiety X)-type motif 7                                       | -1.50 | 0.55 | 0.20 |
| A_51_P495232  | NM_027127 | Gpx8      | 69590  | glutathione peroxidase 8 (putative)                                                               | -1.76 | 0.55 | 0.07 |
| A_52_P194289  | AK166886  | lqsec1    | 232227 | IQ motif and Sec7 domain 1                                                                        | -1.96 | 0.55 | 0.03 |
| A_51_P328968  | NM_172586 | Zfp322a   | 218100 | zinc finger protein 322A                                                                          | -1.99 | 0.55 | 0.03 |
| A_52_P503334  | NM_153592 | Erlin2    | 244373 | ER lipid raft associated 2                                                                        | -2.39 | 0.55 | 0.01 |
| A_52_P699954  | AK081401  | NA        | NA     | NA                                                                                                | -1.86 | 0.55 | 0.04 |
| A_52_P144363  | AF127140  | Fgfr4     | 14186  | fibroblast growth factor receptor 4                                                               | -1.39 | 0.55 | 0.30 |

|              |           |           |        |                                                                                                                              |       |      |      |
|--------------|-----------|-----------|--------|------------------------------------------------------------------------------------------------------------------------------|-------|------|------|
| A_51_P474431 | NM_023117 | Cdc25b    | 12531  | cell division cycle 25 homolog B ( <i>S. pombe</i> )                                                                         | -2.01 | 0.54 | 0.02 |
| A_51_P284867 | AK052031  | D230038C2 | 328872 | hypothetical protein D230038C21                                                                                              | -2.01 | 0.54 | 0.02 |
| A_51_P152234 | NM_019797 | Trip4     | 56404  | thyroid hormone receptor interactor 4                                                                                        | -1.95 | 0.54 | 0.03 |
| A_52_P412543 | NM_172502 | Dcaf15    | 212123 | DDB1 and CUL4 associated factor 15                                                                                           | -1.84 | 0.54 | 0.04 |
| A_51_P452861 | AK147511  | 1810043G0 | 67884  | RIKEN cDNA 1810043G02 gene                                                                                                   | -2.22 | 0.54 | 0.01 |
| A_52_P127682 | AK147384  | Dagla     | 269060 | diacylglycerol lipase, alpha<br>UDP-GlcNAc:betaGal beta-1,3-N-                                                               | -2.04 | 0.54 | 0.02 |
| A_51_P305320 | NM_175383 | B3gnt1    | 108902 | acetylglucosaminyltransferase 1                                                                                              | -1.89 | 0.54 | 0.04 |
| A_52_P233687 | AK029732  | Stard9    | 668880 | START domain containing 9                                                                                                    | -2.25 | 0.54 | 0.01 |
| A_51_P132592 | NM_029998 | 6030458C1 | 77877  | RIKEN cDNA 6030458C11 gene                                                                                                   | -2.04 | 0.54 | 0.02 |
| A_52_P457100 | AK078650  | Mosc2     | 67247  | MOCO sulphurase C-terminal domain containing 2                                                                               | -1.50 | 0.54 | 0.20 |
| A_51_P454943 | NM_008157 | Gpr19     | 14760  | G protein-coupled receptor 19                                                                                                | -1.86 | 0.54 | 0.04 |
| A_51_P425737 | NM_025935 | Tbc1d7    | 67046  | TBC1 domain family, member 7                                                                                                 | -2.07 | 0.54 | 0.02 |
| A_52_P609334 | NM_030075 | Klhdc8b   | 78267  | kelch domain containing 8B                                                                                                   | -1.67 | 0.54 | 0.10 |
| A_52_P120719 | NM_030554 | Rab27b    | 80718  | RAB27b, member RAS oncogene family                                                                                           | -1.21 | 0.54 | 0.61 |
| A_51_P348334 | NM_011144 | Ppara     | 19013  | peroxisome proliferator activated receptor alpha                                                                             | -1.64 | 0.54 | 0.11 |
| A_51_P421680 | BC064456  | Zfp383    | 73729  | zinc finger protein 383                                                                                                      | -1.23 | 0.54 | 0.58 |
| A_51_P281806 | XM_618787 | NA        | NA     | NA                                                                                                                           | -1.71 | 0.54 | 0.07 |
| A_52_P500077 | NM_001033 | Zfp551    | 619331 | zinc fingr protein 551                                                                                                       | -2.08 | 0.54 | 0.02 |
| A_52_P85418  | XM_132817 | NA        | NA     | NA                                                                                                                           | -1.94 | 0.54 | 0.03 |
| A_51_P184024 | NM_025677 | Tsen15    | 66637  | tRNA splicing endonuclease 15 homolog ( <i>S. cerevisiae</i> )<br>methylthioribose-1-phosphate isomerase homolog ( <i>S.</i> | -2.20 | 0.54 | 0.01 |
| A_52_P367792 | NM_026423 | Mri1      | 67873  | <i>cerevisiae</i> )                                                                                                          | -1.74 | 0.54 | 0.07 |
| A_52_P353363 | NM_172153 | Lcorl     | 209707 | ligand dependent nuclear receptor corepressor-like                                                                           | -1.44 | 0.54 | 0.22 |
| A_52_P478289 | NM_198957 | C430048L1 | 77604  | RIKEN cDNA C430048L16 gene                                                                                                   | -1.38 | 0.54 | 0.30 |
| A_52_P210164 | AK077623  | 4930471M  | 74919  | RIKEN cDNA 4930471M23 gene                                                                                                   | -1.72 | 0.54 | 0.07 |
| A_52_P505944 | NM_026283 | Samd8     | 67630  | sterile alpha motif domain containing 8                                                                                      | -1.79 | 0.54 | 0.06 |
| A_51_P155361 | NM_013551 | Hmbs      | 15288  | hydroxymethylbilane synthase                                                                                                 | -2.03 | 0.54 | 0.02 |
| A_51_P381029 | NM_008515 | Lrrfip1   | 16978  | leucine rich repeat (in FLII) interacting protein 1<br>dysbindin (dystrobrevin binding protein 1) domain                     | -1.92 | 0.54 | 0.04 |
| A_52_P256569 | NM_026797 | Dbnidd2   | 52840  | containing 2                                                                                                                 | -1.99 | 0.54 | 0.03 |

|              |           |            |         |                                                          |       |      |      |
|--------------|-----------|------------|---------|----------------------------------------------------------|-------|------|------|
| A_51_P389978 | NM_015782 | Snrpa      | 53607   | small nuclear ribonucleoprotein polypeptide A            | -2.27 | 0.54 | 0.01 |
| A_51_P331318 | NM_007537 | Bcl2l2     | 12050   | BCL2-like 2                                              | -1.50 | 0.54 | 0.20 |
| A_51_P468505 | NM_001007 | 2810408M09 | 381406  | RIKEN cDNA 2810408M09 gene                               | -2.00 | 0.54 | 0.02 |
| A_51_P453088 | NM_174987 | 1810063B05 | 67892   | RIKEN cDNA 1810063B05 gene                               | -1.78 | 0.54 | 0.06 |
| A_51_P483373 | NM_145367 | Txndc5     | 105245  | thioredoxin domain containing 5                          | -1.31 | 0.54 | 0.40 |
|              |           |            |         | eukaryotic translation initiation factor 1A domain       |       |      |      |
| A_52_P278154 | NM_027236 | Eif1ad     | 69860   | containing                                               | -1.83 | 0.54 | 0.04 |
| A_52_P325819 | AK137406  | Yy1        | 22632   | YY1 transcription factor                                 | -1.79 | 0.54 | 0.06 |
| A_52_P270145 | NM_026046 | Zfp329     | 67230   | zinc finger protein 329                                  | -1.58 | 0.54 | 0.15 |
| A_52_P425860 | BC026481  | lqsec1     | 232227  | IQ motif and Sec7 domain 1                               | -1.98 | 0.54 | 0.03 |
| A_52_P462257 | NM_177251 | D830014E11 | 1320751 | RIKEN cDNA D830014E11 gene                               | -1.69 | 0.54 | 0.09 |
| A_52_P965217 | AI451738  | NA         | NA      | NA                                                       | -1.63 | 0.54 | 0.12 |
| A_52_P657759 | NM_178909 | Wdr92      | 103784  | WD repeat domain 92                                      | -1.43 | 0.54 | 0.24 |
| A_52_P460522 | XM_001000 | NA         | NA      | NA                                                       | -1.89 | 0.54 | 0.04 |
|              |           |            |         |                                                          |       |      |      |
| A_51_P232107 | NM_011822 | Pigq       | 14755   | phosphatidylinositol glycan anchor biosynthesis, class Q | -1.65 | 0.54 | 0.11 |
| A_51_P139748 | NM_009338 | Acat2      | 110460  | acetyl-Coenzyme A acetyltransferase 2                    | -1.97 | 0.54 | 0.03 |
| A_51_P133198 | NM_011304 | Ruvbl2     | 20174   | RuvB-like protein 2                                      | -2.08 | 0.54 | 0.02 |
| A_52_P542165 | NM_001039 | Nelf       | 56876   | nasal embryonic LHRH factor                              | -2.05 | 0.54 | 0.02 |
| A_51_P293087 | NM_008606 | Mmp11      | 17385   | matrix metalloproteinase 11                              | -1.86 | 0.54 | 0.04 |
| A_51_P346472 | NA        | NA         | NA      | NA                                                       | -2.28 | 0.54 | 0.01 |
|              |           |            |         |                                                          |       |      |      |
| A_52_P584415 | AK010665  | Cars2      | 71941   | cysteinyl-tRNA synthetase 2 (mitochondrial)(putative)    | -2.39 | 0.54 | 0.01 |
| A_51_P507899 | NM_029553 | Ttc8       | 76260   | tetratricopeptide repeat domain 8                        | -1.76 | 0.54 | 0.07 |
| A_51_P432563 | NM_031178 | Tlr9       | 81897   | toll-like receptor 9                                     | -2.00 | 0.54 | 0.02 |
| A_52_P215418 | NM_027456 | Armc9      | 78795   | armadillo repeat containing 9                            | -2.17 | 0.54 | 0.01 |
| A_52_P228964 | NM_001077 | Shprh      | 268281  | SNF2 histone linker PHD RING helicase                    | -1.49 | 0.54 | 0.20 |
| A_51_P152222 | NM_025739 | Rnf220     | 66743   | ring finger protein 220                                  | -1.81 | 0.54 | 0.05 |
| A_52_P470030 | NM_181404 | Kank1      | 107351  | KN motif and ankyrin repeat domains 1                    | -1.43 | 0.54 | 0.24 |
| A_51_P152797 | AK012887  | 2810039B1  | 172665  | RIKEN cDNA 2810039B14 gene                               | -2.02 | 0.54 | 0.02 |
| A_52_P385606 | NM_021273 | Ckb        | 12709   | creatine kinase, brain                                   | -2.25 | 0.54 | 0.01 |
|              |           |            |         | phosphatidic acid phosphatase type 2 domain              |       |      |      |
| A_51_P281593 | AK144593  | Ppapdc1b   | 71910   | containing 1B                                            | -1.10 | 0.54 | 0.97 |

|              |           |          |        |                                                                                                                                 |       |      |      |
|--------------|-----------|----------|--------|---------------------------------------------------------------------------------------------------------------------------------|-------|------|------|
|              |           |          |        | sema domain, immunoglobulin domain (Ig),<br>transmembrane domain (TM) and short cytoplasmic<br>domain, (semaphorin) 4A          | -1.79 | 0.54 | 0.06 |
| A_51_P195066 | NM_013658 | Sema4a   | 20351  |                                                                                                                                 |       |      |      |
| A_51_P348183 | NM_001040 | Tmem141  | 51875  | transmembrane protein 141                                                                                                       | -2.15 | 0.54 | 0.01 |
| A_52_P137691 | NM_025701 | Trappc5  | 66682  | trafficking protein particle complex 5                                                                                          | -2.00 | 0.54 | 0.02 |
| A_52_P516656 | NM_197985 | Adipor2  | 68465  | adiponectin receptor 2                                                                                                          | -1.32 | 0.54 | 0.40 |
| A_52_P239485 | NM_145505 | Fam160b1 | 226252 | family with sequence similarity 160, member B1                                                                                  | -2.10 | 0.54 | 0.02 |
| A_51_P276235 | NM_146251 | Pnpla7   | 241274 | patatin-like phospholipase domain containing 7                                                                                  | -2.19 | 0.54 | 0.01 |
| A_51_P103209 | NM_028639 | Ttc7     | 225049 | tetratricopeptide repeat domain 7                                                                                               | -2.00 | 0.54 | 0.02 |
| A_51_P500996 | NM_028149 | Fbxl20   | 72194  | F-box and leucine-rich repeat protein 20                                                                                        | -1.49 | 0.54 | 0.20 |
| A_51_P490817 | NM_145494 | Me2      | 107029 | malic enzyme 2, NAD(+)-dependent, mitochondrial<br>TAF6 RNA polymerase II, TATA box binding protein (TBP)-<br>associated factor | -2.10 | 0.54 | 0.01 |
| A_51_P443053 | NM_009315 | Taf6     | 21343  |                                                                                                                                 | -1.72 | 0.54 | 0.07 |
| A_52_P546135 | NA        | NA       | NA     | NA                                                                                                                              | -2.03 | 0.54 | 0.02 |
| A_51_P277116 | BI738048  | NA       | NA     | NA                                                                                                                              | -2.34 | 0.54 | 0.01 |
| A_51_P302453 | NM_172589 | Lhfp12   | 218454 | lipoma HMGIC fusion partner-like 2                                                                                              | -1.82 | 0.54 | 0.05 |
| A_52_P98674  | NM_009771 | Btrc     | 12234  | beta-transducin repeat containing protein                                                                                       | -2.01 | 0.54 | 0.02 |
| A_51_P115940 | NM_172787 | L3mbt13  | 237339 | l(3)mbt-like 3 (Drosophila)                                                                                                     | -1.64 | 0.54 | 0.11 |
| A_51_P216593 | NM_011716 | Wfs1     | 22393  | Wolfram syndrome 1 homolog (human)                                                                                              | -1.45 | 0.54 | 0.22 |
| A_51_P239286 | NM_029410 | Bcl2l12  | 75736  | BCL2-like 12 (proline rich)                                                                                                     | -1.71 | 0.54 | 0.07 |
| A_51_P393161 | AK173175  | Scaper   | 244891 | S phase cyclin A-associated protein in the ER                                                                                   | -1.69 | 0.54 | 0.09 |
| A_51_P178124 | NM_016882 | Sart1    | 20227  | squamous cell carcinoma antigen recognized by T-cells 1                                                                         | -1.72 | 0.54 | 0.07 |
| A_51_P130475 | NM_009523 | Wnt4     | 22417  | wingless-related MMTV integration site 4                                                                                        | -2.43 | 0.54 | 0.00 |
| A_51_P162773 | NM_178653 | Scpdp    | 109232 | saccharopine dehydrogenase (putative)                                                                                           | -2.08 | 0.54 | 0.02 |
| A_52_P476431 | NM_021292 | Evc      | 59056  | Ellis van Creveld gene homolog (human)                                                                                          | -1.99 | 0.54 | 0.03 |
| A_51_P219028 | NM_026898 | Wdr53    | 68980  | WD repeat domain 53                                                                                                             | -2.23 | 0.54 | 0.01 |
| A_52_P520439 | NM_018858 | Pebp1    | 23980  | phosphatidylethanolamine binding protein 1                                                                                      | -1.80 | 0.54 | 0.05 |
| A_51_P470228 | NM_001033 | Spryd3   | 223918 | SPRY domain containing 3                                                                                                        | -2.04 | 0.54 | 0.02 |
| A_52_P228031 | NM_026325 | Tmem179k | 67706  | transmembrane protein 179B<br>GCN1 general control of amino-acid synthesis 1-like 1<br>(yeast)                                  | -2.05 | 0.54 | 0.02 |
| A_52_P478451 | NM_172719 | Gcn1l1   | 231659 |                                                                                                                                 | -1.91 | 0.54 | 0.04 |
| A_51_P242687 | NA        | NA       | NA     | NA                                                                                                                              | -1.25 | 0.54 | 0.55 |

|              |           |          |        |                                                                                                |       |      |      |
|--------------|-----------|----------|--------|------------------------------------------------------------------------------------------------|-------|------|------|
| A_51_P434859 | XM_890447 | Mllt4    | 17356  | myeloid/lymphoid or mixed-lineage leukemia (trithorax homolog, Drosophila); translocated to, 4 | -2.60 | 0.54 | 0.00 |
| A_51_P359411 | NM_008141 | Gnat2    | 14686  | guanine nucleotide binding protein, alpha transducing 2                                        | -1.50 | 0.54 | 0.20 |
| A_51_P519555 | NM_023120 | Gnb1l    | 13972  | guanine nucleotide binding protein (G protein), beta polypeptide 1-like                        | -1.66 | 0.54 | 0.11 |
| A_52_P544410 | BC010667  | Ap3m1    | 55946  | adaptor-related protein complex 3, mu 1 subunit                                                | -1.52 | 0.54 | 0.18 |
| A_52_P487483 | NM_011822 | Pigq     | 14755  | phosphatidylinositol glycan anchor biosynthesis, class Q                                       | -2.03 | 0.54 | 0.02 |
| A_52_P55258  | XM_981410 | NA       | NA     | NA                                                                                             | -1.44 | 0.54 | 0.22 |
| A_52_P74368  | NM_173388 | Slc43a2  | 215113 | solute carrier family 43, member 2                                                             | -2.40 | 0.54 | 0.01 |
| A_52_P638926 | AK147019  | Leng9    | 243813 | leukocyte receptor cluster (LRC) member 9                                                      | -1.77 | 0.54 | 0.07 |
| A_51_P512541 | AK049709  | Sdr39u1  | 654795 | short chain dehydrogenase/reductase family 39U, member 1                                       | -1.43 | 0.54 | 0.24 |
| A_52_P146918 | NM_011814 | Fxr2     | 23879  | fragile X mental retardation, autosomal homolog 2                                              | -1.90 | 0.54 | 0.04 |
| A_51_P360836 | NM_178604 | Txnl4a   | 27366  | thioredoxin-like 4A                                                                            | -1.95 | 0.54 | 0.03 |
| A_51_P176625 | BC026442  | Zbtb8os  | 67106  | zinc finger and BTB domain containing 8 opposite strand                                        | -2.09 | 0.54 | 0.02 |
| A_52_P802967 | AK035497  | NA       | NA     | NA                                                                                             | -1.99 | 0.54 | 0.03 |
| A_52_P365660 | NM_178725 | Lrrc4c   | 241568 | leucine rich repeat containing 4C                                                              | -1.93 | 0.54 | 0.03 |
| A_51_P206203 | NM_145379 | Mrgprf   | 211577 | MAS-related GPR, member F                                                                      | -1.83 | 0.54 | 0.04 |
| A_52_P59457  | NM_018879 | Tusc4    | 56032  | tumor suppressor candidate 4                                                                   | -2.30 | 0.54 | 0.01 |
| A_51_P449795 | NM_007763 | Crip1    | 12925  | cysteine-rich protein 1 (intestinal)                                                           | -1.46 | 0.54 | 0.21 |
| A_51_P415220 | NM_009517 | Zmat3    | 22401  | zinc finger matrin type 3                                                                      | -2.07 | 0.54 | 0.02 |
| A_51_P221852 | NM_010744 | Tmed1    | 17083  | transmembrane emp24 domain containing 1                                                        | -1.68 | 0.54 | 0.10 |
| A_51_P288479 | NM_181328 | Slc25a29 | 214663 | solute carrier family 25 (mitochondrial carrier, palmitoylcarnitine transporter), member 29    | -1.96 | 0.54 | 0.03 |
| A_52_P538447 | NM_139063 | Muted    | 17828  | muted                                                                                          | -1.75 | 0.54 | 0.07 |
| A_51_P437027 | NM_009870 | Cdk4     | 12567  | cyclin-dependent kinase 4                                                                      | -1.66 | 0.54 | 0.11 |
| A_52_P126266 | NM_182997 | Prkab2   | 108097 | protein kinase, AMP-activated, beta 2 non-catalytic subunit                                    | -2.27 | 0.54 | 0.01 |

|              |           |          |        |                                                          |       |      |      |
|--------------|-----------|----------|--------|----------------------------------------------------------|-------|------|------|
| A_51_P239456 | AK010567  | Polr2e   | 66420  | polymerase (RNA) II (DNA directed) polypeptide E         | -1.10 | 0.54 | 0.91 |
| A_51_P487360 | NM_016677 | Hpcal1   | 53602  | hippocalcin-like 1                                       | -1.71 | 0.54 | 0.07 |
| A_51_P443314 | NM_029294 | Prps11l  | 75456  | phosphoribosyl pyrophosphate synthetase 1-like 1         | -1.85 | 0.54 | 0.04 |
| A_51_P502957 | NM_011505 | Stxbp4   | 20913  | syntaxin binding protein 4                               | -1.94 | 0.54 | 0.03 |
| A_51_P463120 | NM_025760 | Ptplad2  | 66775  | protein tyrosine phosphatase-like A domain containing 2  | -1.92 | 0.54 | 0.03 |
| A_52_P485971 | NM_001001 | Scap     | 235623 | SREBF chaperone                                          | -1.93 | 0.54 | 0.03 |
| A_51_P279914 | NM_174870 | Slc26a1  | 231583 | solute carrier family 26 (sulfate transporter), member 1 | -1.12 | 0.54 | 0.86 |
| A_51_P399477 | AK143126  | Dennd5b  | 320560 | DENN/MADD domain containing 5B                           | -2.60 | 0.54 | 0.00 |
| A_51_P160328 | NM_007624 | Cbx3     | 12417  | chromobox homolog 3 (Drosophila HP1 gamma)               | -2.24 | 0.54 | 0.01 |
| A_51_P486906 | NM_181424 | Gtpbp5   | 52856  | GTP binding protein 5                                    | -1.56 | 0.54 | 0.15 |
| A_52_P121703 | AK172237  | Gm3625   | 1E+08  | predicted gene 3625                                      | -2.42 | 0.54 | 0.00 |
| A_52_P883557 | NM_001033 | Slc30a10 | 226781 | solute carrier family 30, member 10                      | -1.21 | 0.54 | 0.61 |
| A_52_P476421 | AK145748  | Gle1     | 74412  | GLE1 RNA export mediator (yeast)                         | -2.15 | 0.54 | 0.01 |
| A_52_P110999 | NM_025830 | Wwp2     | 66894  | WW domain containing E3 ubiquitin protein ligase 2       | -1.86 | 0.54 | 0.04 |
| A_51_P212420 | NM_010681 | Lama4    | 16775  | laminin, alpha 4                                         | -1.85 | 0.54 | 0.04 |
| A_52_P435118 | NM_146258 | Stard13  | 243362 | StAR-related lipid transfer (START) domain containing 13 | -2.17 | 0.54 | 0.01 |
| A_51_P318580 | NM_028021 | Myh14    | 71960  | myosin, heavy polypeptide 14                             | -1.83 | 0.54 | 0.05 |
| A_52_P110002 | NM_025591 | Fam136a  | 66488  | family with sequence similarity 136, member A            | -1.69 | 0.53 | 0.09 |
| A_51_P490678 | NM_198012 | Trim68   | 101700 | tripartite motif-containing 68                           | -1.99 | 0.53 | 0.03 |
| A_52_P350581 | NM_031408 | Gigyf1   | 57330  | GRB10 interacting GYF protein 1                          | -1.83 | 0.53 | 0.04 |
| A_52_P674759 | NM_145534 | Btbd3    | 228662 | BTB (POZ) domain containing 3                            | -1.91 | 0.53 | 0.04 |
| A_52_P308863 | NM_025926 | Dnajb4   | 67035  | Dnal (Hsp40) homolog, subfamily B, member 4              | -2.15 | 0.53 | 0.01 |
| A_51_P343016 | NM_145830 | Ehmt2    | 110147 | euchromatic histone lysine N-methyltransferase 2         | -2.30 | 0.53 | 0.01 |
| A_51_P159792 | NM_009928 | Col15a1  | 12819  | collagen, type XV, alpha 1                               | -1.98 | 0.53 | 0.03 |
| A_52_P672850 | NM_021280 | Plcg1    | 18803  | phospholipase C, gamma 1                                 | -2.43 | 0.53 | 0.00 |
| A_51_P341789 | NM_027481 | Sf4      | 70616  | splicing factor 4                                        | -1.76 | 0.53 | 0.07 |
| A_51_P436342 | NM_008268 | Hoxb5    | 15413  | homeobox B5                                              | -2.36 | 0.53 | 0.01 |

|              |           |           |        |                                                                                                                                         |       |      |      |
|--------------|-----------|-----------|--------|-----------------------------------------------------------------------------------------------------------------------------------------|-------|------|------|
| A_52_P462358 | NM_199009 | Fam160a2  | 74349  | family with sequence similarity 160, member A2                                                                                          | -2.30 | 0.53 | 0.01 |
| A_51_P428013 | AK005562  | Eml2      | 72205  | echinoderm microtubule associated protein like 2                                                                                        | -2.14 | 0.53 | 0.01 |
| A_51_P248644 | BC065162  | Tdp1      | 104884 | tyrosyl-DNA phosphodiesterase 1                                                                                                         | -2.20 | 0.53 | 0.01 |
| A_52_P297290 | NM_011012 | Oprl1     | 18389  | opioid receptor-like 1                                                                                                                  | -2.07 | 0.53 | 0.02 |
| A_51_P361220 | NM_008055 | Fzd4      | 14366  | frizzled homolog 4 (Drosophila)                                                                                                         | -1.70 | 0.53 | 0.09 |
| A_51_P418765 | NM_009266 | Sephs2    | 20768  | selenophosphate synthetase 2                                                                                                            | -1.38 | 0.53 | 0.30 |
| A_51_P251821 | NM_008507 | Sh2b3     | 16923  | SH2B adaptor protein 3                                                                                                                  | -2.23 | 0.53 | 0.01 |
| A_51_P331661 | NM_027873 | Ubiad1    | 71707  | UbiA prenyltransferase domain containing 1                                                                                              | -1.33 | 0.53 | 0.40 |
| A_52_P436364 | AK129255  | Chsy1     | 269941 | chondroitin sulfate synthase 1                                                                                                          | -1.77 | 0.53 | 0.06 |
| A_52_P291509 | BC016231  | Gtf2h2    | 23894  | general transcription factor II H, polypeptide 2                                                                                        | -2.22 | 0.53 | 0.01 |
| A_52_P44949  | NM_024427 | Tpm1      | 22003  | tropomyosin 1, alpha                                                                                                                    | -1.77 | 0.53 | 0.06 |
| A_52_P76402  | BC027783  | Eif2c1    | 236511 | eukaryotic translation initiation factor 2C, 1                                                                                          | -1.97 | 0.53 | 0.03 |
| A_52_P834112 | AK013908  | 3021401N2 | 70680  | RIKEN cDNA 3021401N23 gene                                                                                                              | -2.16 | 0.53 | 0.01 |
| A_51_P103757 | NM_026370 | Myst1     | 67773  | MYST histone acetyltransferase 1                                                                                                        | -2.28 | 0.53 | 0.01 |
| A_51_P182456 | AK009638  | Pcgf3     | 69587  | polycomb group ring finger 3                                                                                                            | -1.95 | 0.53 | 0.03 |
| A_51_P137383 | NM_152807 | Ccdc137   | 67291  | coiled-coil domain containing 137                                                                                                       | -2.01 | 0.53 | 0.02 |
| A_52_P475040 | NM_026576 | Etaa1     | 68145  | Ewing's tumor-associated antigen 1                                                                                                      | -1.60 | 0.53 | 0.14 |
| A_52_P368881 | XM_355585 | Rbm33     | 381626 | RNA binding motif protein 33                                                                                                            | -1.50 | 0.53 | 0.20 |
| A_52_P113350 | NM_212433 | Fbxo3     | 57443  | F-box protein 3                                                                                                                         | -2.10 | 0.53 | 0.01 |
| A_51_P498152 | BC061227  | Sat2      | 69215  | spermidine/spermine N1-acetyl transferase 2                                                                                             | -1.71 | 0.53 | 0.07 |
| A_52_P590235 | BC057036  | Vars2     | 68915  | valyl-tRNA synthetase 2, mitochondrial (putative)<br>protein phosphatase 2, regulatory subunit B (B56),<br>epsilon isoform              | -1.57 | 0.53 | 0.15 |
| A_51_P127607 | NM_012024 | Ppp2r5e   | 26932  | epsilon isoform                                                                                                                         | -1.41 | 0.53 | 0.27 |
| A_51_P416846 | NM_028129 | 2610020HC | 434234 | RIKEN cDNA 2610020H08 gene                                                                                                              | -2.06 | 0.53 | 0.02 |
| A_51_P201609 | NM_153762 | Rnf26     | 213211 | ring finger protein 26                                                                                                                  | -2.21 | 0.53 | 0.01 |
| A_52_P78033  | AK005166  | Ip6k2     | 76500  | inositol hexaphosphate kinase 2<br>pancreatic progenitor cell differentiation and<br>proliferation factor homolog (zebrafish)RIKEN cDNA | -1.52 | 0.53 | 0.18 |
| A_51_P299266 | NM_025598 | Ppdpf     | 66496  | 2700038C09 gene                                                                                                                         | -1.97 | 0.53 | 0.03 |
| A_51_P419833 | NM_177889 | Zfp82     | 330502 | zinc finger protein 82                                                                                                                  | -2.22 | 0.53 | 0.01 |
| A_51_P405659 | NM_175342 | Cphx      | 105594 | cytoplasmic polyadenylated homeobox                                                                                                     | -1.87 | 0.53 | 0.04 |
| A_52_P70854  | NM_020507 | Tob2      | 57259  | transducer of ERBB2, 2                                                                                                                  | -1.42 | 0.53 | 0.27 |

|              |           |            |        |                                                                                     |       |      |      |
|--------------|-----------|------------|--------|-------------------------------------------------------------------------------------|-------|------|------|
| A_52_P529570 | NM_198654 | Nsl1       | 381318 | NSL1, MIND kinetochore complex component, homolog (S. cerevisiae)                   | -1.74 | 0.53 | 0.07 |
| A_51_P120305 | NM_001039 | Elov1      | 54325  | elongation of very long chain fatty acids (FEN1/Elo2, SUR4/Elo3, yeast)-like 1      | -2.12 | 0.53 | 0.01 |
| A_51_P417643 | NM_008259 | Foxa1      | 15375  | forkhead box A1                                                                     | -1.46 | 0.53 | 0.22 |
| A_51_P309740 | NM_001033 | Usp40      | 227334 | ubiquitin specific peptidase 40                                                     | -1.64 | 0.53 | 0.11 |
| A_52_P336585 | NM_028717 | Als2       | 74018  | amyotrophic lateral sclerosis 2 (juvenile) homolog (human)                          | -1.92 | 0.53 | 0.04 |
| A_51_P459679 | NM_007978 | F8a        | 14070  | factor 8-associated gene A                                                          | -2.23 | 0.53 | 0.01 |
| A_51_P512591 | NM_172395 | Cdc42se1   | 57912  | CDC42 small effector 1                                                              | -1.85 | 0.53 | 0.04 |
| A_51_P121302 | NM_029431 | Them4      | 75778  | thioesterase superfamily member 4                                                   | -1.85 | 0.53 | 0.04 |
| A_51_P365854 | NM_177632 | Fam43a     | 224093 | family with sequence similarity 43, member A                                        | -2.13 | 0.53 | 0.01 |
| A_52_P120055 | NM_009171 | Shmt1      | 20425  | serine hydroxymethyltransferase 1 (soluble)                                         | -1.67 | 0.53 | 0.10 |
| A_52_P630571 | XM_973419 | 5430411K1  | 71423  | RIKEN cDNA 5430411K18 gene                                                          | -2.04 | 0.53 | 0.02 |
| A_51_P409194 | NM_177362 | Zfp771     | 244216 | zinc finger protein 771                                                             | -1.97 | 0.53 | 0.03 |
| A_51_P393958 | NM_025995 | Fbxo5      | 67141  | F-box protein 5                                                                     | -2.05 | 0.53 | 0.02 |
| A_52_P548921 | AK171849  | Lrrk1      | 233328 | leucine-rich repeat kinase 1                                                        | -1.09 | 0.53 | 0.97 |
| A_51_P343566 | NM_134189 | Galnt10    | 171212 | UDP-N-acetyl-alpha-D-galactosamine:polypeptide N-acetylgalactosaminyltransferase 10 | -1.72 | 0.53 | 0.07 |
| A_51_P245989 | NM_009915 | Ccr2       | 12772  | chemokine (C-C motif) receptor 2                                                    | -2.36 | 0.53 | 0.01 |
| A_51_P187697 | NM_028984 | 8430406I07 | 74528  | RIKEN cDNA 8430406I07 gene                                                          | -2.35 | 0.53 | 0.01 |
| A_52_P582384 | NM_026272 | Narf       | 67608  | nuclear prelamin A recognition factor                                               | -1.10 | 0.53 | 0.97 |
| A_52_P455540 | NM_001013 | Ric8b      | 237422 | resistance to inhibitors of cholinesterase 8 homolog B (C. elegans)                 | -2.07 | 0.53 | 0.02 |
| A_52_P578732 | NM_009917 | Ccr5       | 12774  | chemokine (C-C motif) receptor 5                                                    | -1.82 | 0.53 | 0.05 |
| A_52_P458319 | NM_153788 | Acap1      | 216859 | ArfGAP with coiled-coil, ankyrin repeat and PH domains 1                            | -2.32 | 0.53 | 0.01 |
| A_52_P316545 | AK009476  | Haus5      | 71909  | HAUS augmin-like complex, subunit 5                                                 | -2.14 | 0.53 | 0.01 |
| A_51_P486068 | NM_177475 | Zfp280b    | 64453  | zinc finger protein 280B                                                            | -2.03 | 0.53 | 0.02 |
| A_52_P306387 | NM_178709 | Rnf214     | 235315 | ring finger protein 214                                                             | -1.63 | 0.53 | 0.12 |
| A_51_P346380 | AK011616  | 2610029K1  | 69250  | RIKEN cDNA 2610029K11 gene                                                          | -1.83 | 0.53 | 0.05 |
| A_52_P278192 | NM_011232 | Rad1       | 19355  | RAD1 homolog (S. pombe)                                                             | -1.54 | 0.53 | 0.16 |
| A_51_P503751 | NM_023503 | Ing2       | 69260  | inhibitor of growth family, member 2                                                | -1.86 | 0.53 | 0.04 |



|              |           |           |        |                                                                                 |       |      |      |
|--------------|-----------|-----------|--------|---------------------------------------------------------------------------------|-------|------|------|
| A_51_P394946 | NM_024438 | Dusp19    | 68082  | dual specificity phosphatase 19                                                 | -1.95 | 0.53 | 0.03 |
| A_51_P498004 | NM_010301 | Gna11     | 14672  | guanine nucleotide binding protein, alpha 11                                    | -2.06 | 0.53 | 0.02 |
| A_51_P211403 | NM_008101 | Gcgr      | 14527  | glucagon receptor                                                               | -1.97 | 0.53 | 0.03 |
| A_51_P391466 | NM_019410 | Pfn2      | 18645  | profilin 2                                                                      | -1.80 | 0.53 | 0.05 |
| A_52_P5652   | NM_019748 | Sae1      | 56459  | SUMO1 activating enzyme subunit 1                                               | -1.64 | 0.53 | 0.11 |
| A_51_P322265 | NM_027817 | Grap      | 71520  | GRB2-related adaptor protein                                                    | -1.49 | 0.53 | 0.20 |
| A_52_P480709 | NM_009642 | Agtrap    | 11610  | angiotensin II, type I receptor-associated protein                              | -1.85 | 0.53 | 0.04 |
| A_51_P286321 | NM_026760 | 2310036O2 | 68544  | RIKEN cDNA 2310036O22 gene                                                      | -2.28 | 0.53 | 0.01 |
| A_51_P322574 | NM_178576 | Cpsf4     | 54188  | cleavage and polyadenylation specific factor 4                                  | -1.92 | 0.53 | 0.04 |
| A_51_P251367 | NM_181344 | C1rl      | 232371 | complement component 1, r subcomponent-like                                     | -1.87 | 0.53 | 0.04 |
| A_52_P458742 | NM_053084 | Trim32    | 69807  | tripartite motif-containing 32                                                  | -1.88 | 0.53 | 0.04 |
| A_51_P455597 | NM_133767 | Mtif2     | 76784  | mitochondrial translational initiation factor 2                                 | -1.78 | 0.53 | 0.06 |
| A_51_P388298 | NM_025962 | Mmachc    | 67096  | methylmalonic aciduria cblC type, with homocystinuria                           | -2.03 | 0.53 | 0.02 |
| A_52_P13337  | NA        | NA        | NA     | NA                                                                              | -1.68 | 0.53 | 0.09 |
| A_51_P323450 | NM_020006 | Cdc42ep4  | 56699  | CDC42 effector protein (Rho GTPase binding) 4                                   | -1.91 | 0.53 | 0.04 |
| A_51_P216742 | NM_021493 | Arhgap23  | 58996  | Rho GTPase activating protein 23                                                | -1.79 | 0.53 | 0.06 |
| A_52_P513034 | NM_172974 | Cops7b    | 26895  | COP9 (constitutive photomorphogenic) homolog, subunit 7b (Arabidopsis thaliana) | -1.52 | 0.53 | 0.18 |
| A_51_P401527 | NM_183263 | Rnmtl1    | 67390  | RNA methyltransferase like 1                                                    | -1.64 | 0.53 | 0.11 |
| A_52_P615138 | NM_025558 | Cyb5b     | 66427  | cytochrome b5 type B                                                            | -2.19 | 0.53 | 0.01 |
| A_51_P355413 | NM_022656 | Nisch     | 64652  | nischarin                                                                       | -1.88 | 0.53 | 0.04 |
| A_51_P319551 | AK149180  | Kif3a     | 16568  | kinesin family member 3A                                                        | -2.02 | 0.53 | 0.02 |
| A_52_P122696 | NM_019722 | Arl2      | 56327  | ADP-ribosylation factor-like 2                                                  | -2.52 | 0.53 | 0.00 |
| A_52_P145975 | AK140743  | Dync1li2  | 234663 | dynein, cytoplasmic 1 light intermediate chain 2                                | -2.49 | 0.53 | 0.00 |
| A_51_P111245 | NM_172262 | Kdm1b     | 218214 | lysine (K)-specific demethylase 1B                                              | -2.32 | 0.53 | 0.01 |
| A_51_P491011 | NM_001033 | Pgap3     | 320655 | post-GPI attachment to proteins 3                                               | -2.08 | 0.53 | 0.02 |
| A_51_P509760 | NM_016860 | Actr1a    | 54130  | ARP1 actin-related protein 1 homolog A, centractin alpha (yeast)                | -2.41 | 0.53 | 0.00 |
| A_51_P399652 | NM_029939 | Ccdc151   | 77609  | coiled-coil domain containing 151                                               | -1.79 | 0.53 | 0.06 |
| A_51_P199012 | NM_018791 | Zfp108    | 54678  | zinc finger protein 108                                                         | -1.46 | 0.53 | 0.21 |
| A_51_P461748 | NM_028207 | Dusp3     | 72349  | dual specificity phosphatase 3 (vaccinia virus phosphatase VH1-related)         | -1.95 | 0.53 | 0.03 |
| A_52_P306831 | NM_001002 | Pram1     | 378460 | PML-RAR alpha-regulated adaptor molecule 1                                      | -1.49 | 0.53 | 0.20 |

|              |           |                 |        |                                                                                         |       |      |      |
|--------------|-----------|-----------------|--------|-----------------------------------------------------------------------------------------|-------|------|------|
| A_52_P388836 | NM_033354 | Sec16b          | 89867  | SEC16 homolog B ( <i>S. cerevisiae</i> )                                                | -1.18 | 0.53 | 0.70 |
| A_52_P419879 | NA        | NA              | NA     | NA                                                                                      | -2.14 | 0.53 | 0.01 |
| A_51_P265406 | NM_053194 | Ric8            | 101489 | resistance to inhibitors of cholinesterase 8 homolog ( <i>C. elegans</i> )              | -2.17 | 0.53 | 0.01 |
| A_51_P392546 | NM_146159 | Haus3           | 231123 | HAUS augmin-like complex, subunit 3                                                     | -2.08 | 0.53 | 0.02 |
| A_52_P497595 | AK131842  | Gm5081          | 328099 | predicted gene 5081                                                                     | -1.99 | 0.53 | 0.03 |
| A_52_P430274 | BC053401  | Heatr2          | 433956 | HEAT repeat containing 2                                                                | -1.65 | 0.53 | 0.11 |
| A_52_P197666 | NM_021521 | Med12           | 59024  | mediator of RNA polymerase II transcription, subunit 12 homolog (yeast)                 | -2.13 | 0.53 | 0.01 |
| A_52_P431894 | NM_016670 | Pknox1          | 18771  | Pbx/knotted 1 homeobox                                                                  | -1.88 | 0.53 | 0.04 |
| A_51_P134972 | NM_138676 | Shkbp1          | 192192 | Sh3kbp1 binding protein 1                                                               | -2.38 | 0.53 | 0.01 |
| A_51_P296158 | NM_001002 | AI413582        | 106672 | expressed sequence AI413582                                                             | -2.04 | 0.53 | 0.02 |
| A_52_P354298 | NM_007459 | Ap2a2           | 11772  | adaptor protein complex AP-2, alpha 2 subunit                                           | -1.70 | 0.53 | 0.09 |
| A_52_P163939 | NM_001033 | Cln6            | 76524  | ceroid-lipofuscinosis, neuronal 6                                                       | -2.33 | 0.53 | 0.01 |
| A_52_P315369 | NM_028057 | Cyb5r1          | 72017  | cytochrome b5 reductase 1                                                               | -2.22 | 0.53 | 0.01 |
| A_51_P466964 | NM_025954 | Pgp             | 67078  | phosphoglycolate phosphatase                                                            | -1.95 | 0.53 | 0.03 |
| A_52_P41894  | NM_007712 | Clk2            | 12748  | CDC-like kinase 2                                                                       | -2.24 | 0.53 | 0.01 |
| A_52_P451775 | NM_026580 | Otub2           | 68149  | OTU domain, ubiquitin aldehyde binding 2                                                | -1.87 | 0.53 | 0.04 |
| A_51_P179907 | NM_145220 | Appl2           | 216190 | adaptor protein, phosphotyrosine interaction, PH domain and leucine zipper containing 2 | -1.74 | 0.53 | 0.07 |
| A_52_P627863 | NM_023672 | Ssbp3           | 72475  | single-stranded DNA binding protein 3                                                   | -1.57 | 0.53 | 0.15 |
| A_52_P627068 | NM_170593 | Disp2           | 214240 | dispatched homolog 2 ( <i>Drosophila</i> )                                              | -1.54 | 0.53 | 0.16 |
| A_51_P157033 | NM_178692 | C130074G1226777 |        | RIKEN cDNA C130074G19 gene                                                              | -1.54 | 0.53 | 0.16 |
| A_52_P531829 | NM_026936 | Oxa1l           | 69089  | oxidase assembly 1-like                                                                 | -1.84 | 0.53 | 0.04 |
| A_52_P282741 | NM_011520 | Sdc3            | 20970  | syndecan 3                                                                              | -2.18 | 0.53 | 0.01 |
| A_51_P505696 | NM_008916 | Inpp5k          | 19062  | inositol polyphosphate 5-phosphatase K                                                  | -1.75 | 0.53 | 0.07 |
| A_51_P491835 | AK013507  | 2900009J2       | 72876  | RIKEN cDNA 2900009J20 gene                                                              | -2.07 | 0.53 | 0.02 |
| A_51_P387764 | X70100    | Fabp5           | 16592  | fatty acid binding protein 5, epidermal                                                 | -1.32 | 0.53 | 0.40 |
| A_51_P237553 | NM_009652 | Akt1            | 11651  | thymoma viral proto-oncogene 1                                                          | -2.14 | 0.53 | 0.01 |
| A_52_P618187 | NM_001013 | Mrs2            | 380836 | MRS2 magnesium homeostasis factor homolog ( <i>S. cerevisiae</i> )                      | -1.79 | 0.53 | 0.06 |
| A_51_P295237 | NM_172784 | Lrp11           | 237253 | low density lipoprotein receptor-related protein 11                                     | -1.81 | 0.53 | 0.05 |
| A_52_P98387  | NM_007438 | Aldoa           | 11674  | aldolase A, fructose-bisphosphate                                                       | -2.46 | 0.53 | 0.00 |

|               |           |           |        |                                                                              |       |      |      |
|---------------|-----------|-----------|--------|------------------------------------------------------------------------------|-------|------|------|
| A_51_P276943  | NM_016696 | Gpc1      | 14733  | glypican 1                                                                   | -1.70 | 0.53 | 0.09 |
| A_52_P264026  | NM_178116 | Camta2    | 216874 | calmodulin binding transcription activator 2                                 | -1.93 | 0.53 | 0.03 |
| A_51_P418469  | NM_023595 | Dut       | 110074 | deoxyuridine triphosphatase                                                  | -2.34 | 0.53 | 0.01 |
| A_51_P193863  | NM_172977 | Gtf3c4    | 269252 | general transcription factor IIIC, polypeptide 4                             | -2.44 | 0.53 | 0.00 |
| A_52_P366932  | NM_010301 | Gna11     | 14672  | guanine nucleotide binding protein, alpha 11                                 | -2.27 | 0.53 | 0.01 |
| A_51_P168133  | NM_022026 | Aqp9      | 64008  | aquaporin 9                                                                  | -1.12 | 0.53 | 0.86 |
| A_52_P590416  | NM_028601 | Zmiz2     | 52915  | zinc finger, MIZ-type containing 2                                           | -2.12 | 0.53 | 0.01 |
| A_51_P249127  | NM_013630 | Pkd1      | 18763  | polycystic kidney disease 1 homolog                                          | -2.39 | 0.53 | 0.01 |
| A_51_P212679  | XM_901651 | NA        | NA     | NA                                                                           | -1.81 | 0.53 | 0.05 |
| A_52_P1163666 | AK032850  | 6720462K0 | 399579 | RIKEN cDNA 6720462K09 gene                                                   | -2.20 | 0.53 | 0.01 |
| A_51_P296528  | NM_026058 | Lass4     | 67260  | LAG1 homolog, ceramide synthase 4                                            | -1.91 | 0.53 | 0.04 |
| A_51_P124550  | NM_139292 | Reep6     | 70335  | receptor accessory protein 6                                                 | -1.43 | 0.53 | 0.24 |
| A_51_P377390  | NM_010811 | Ndst2     | 17423  | N-deacetylase/N-sulfotransferase (heparan<br>glucosaminyl) 2                 | -1.99 | 0.53 | 0.03 |
| A_51_P264956  | NM_008441 | Kif1b     | 16561  | kinesin family member 1B                                                     | -1.95 | 0.53 | 0.03 |
| A_51_P183803  | NM_009174 | Siah2     | 20439  | seven in absentia 2                                                          | -1.38 | 0.53 | 0.30 |
| A_52_P668393  | AK028994  | Cyhr1     | 54151  | cysteine and histidine rich 1                                                | -2.25 | 0.53 | 0.01 |
| A_51_P249250  | AK015468  | Ubxn1     | 225896 | UBX domain protein 1                                                         | -1.99 | 0.53 | 0.03 |
| A_52_P424272  | NM_029645 | Gatc      | 384281 | glutamyl-tRNA(Gln) amidotransferase, subunit C<br>homolog (bacterial)        | -1.60 | 0.53 | 0.13 |
| A_51_P211171  | NA        | NA        | NA     | NA                                                                           | -1.81 | 0.53 | 0.05 |
| A_51_P113106  | NM_007888 | Dvl2      | 13543  | dishevelled 2, dsh homolog (Drosophila)                                      | -2.09 | 0.53 | 0.02 |
| A_52_P397012  | NM_033074 | Tars      | 110960 | threonyl-tRNA synthetase                                                     | -1.66 | 0.53 | 0.11 |
| A_51_P133138  | Y09632    | Kif20a    | 19348  | kinesin family member 20A                                                    | -1.55 | 0.53 | 0.16 |
| A_51_P210300  | XM_150151 | 2310047B1 | 66962  | RIKEN cDNA 2310047B19 gene                                                   | -1.96 | 0.53 | 0.03 |
| A_52_P621064  | NA        | NA        | NA     | NA                                                                           | -2.24 | 0.53 | 0.01 |
| A_51_P135012  | NM_027897 | Rhpn2     | 52428  | rhophilin, Rho GTPase binding protein 2                                      | -1.96 | 0.53 | 0.03 |
| A_51_P292550  | AK052715  | Chdh      | 218865 | choline dehydrogenase                                                        | -1.55 | 0.53 | 0.16 |
| A_51_P164939  | NM_144916 | Tmem150a  | 232086 | transmembrane protein 150A                                                   | -1.84 | 0.53 | 0.04 |
| A_52_P244723  | NM_173038 | Tbcel     | 272589 | tubulin folding cofactor E-like                                              | -1.92 | 0.53 | 0.04 |
| A_52_P289685  | NM_028358 | Ssbp1     | 381760 | single-stranded DNA binding protein 1                                        | -1.92 | 0.53 | 0.04 |
| A_51_P386911  | NM_027346 | Taco1     | 70207  | translational activator of mitochondrially encoded<br>cytochrome c oxidase I | -2.22 | 0.52 | 0.01 |
| A_52_P77793   | NM_015818 | Hs6st1    | 50785  | heparan sulfate 6-O-sulfotransferase 1                                       | -1.96 | 0.52 | 0.03 |

|              |           |           |        |                                                                        |       |      |      |
|--------------|-----------|-----------|--------|------------------------------------------------------------------------|-------|------|------|
| A_52_P612079 | NM_145984 | Prepl     | 213760 | prolyl endopeptidase-like                                              | -2.04 | 0.52 | 0.02 |
| A_51_P353947 | NM_010549 | Il11ra1   | 16157  | interleukin 11 receptor, alpha chain 1                                 | -2.11 | 0.52 | 0.01 |
| A_51_P401176 | NM_175515 | Intu      | 380614 | inturned planar cell polarity effector homolog (Drosophila)            | -1.96 | 0.52 | 0.03 |
| A_51_P435027 | NM_025708 | Tmem186   | 66690  | transmembrane protein 186                                              | -2.36 | 0.52 | 0.01 |
| A_51_P406365 | NM_026859 | Maf1      | 68877  | MAF1 homolog (S. cerevisiae)                                           | -2.43 | 0.52 | 0.00 |
| A_51_P406020 | NM_134076 | Abhd4     | 105501 | abhydrolase domain containing 4                                        | -2.38 | 0.52 | 0.01 |
| A_52_P670070 | S76748    | Vhl       | 22346  | von Hippel-Lindau syndrome                                             | -1.81 | 0.52 | 0.05 |
| A_51_P175354 | AK033366  | 8430406M  | 399592 | RIKEN cDNA 8430406M14 gene                                             | -1.40 | 0.52 | 0.28 |
| A_51_P407879 | NM_145382 | Fam193b   | 212483 | family with sequence similarity 193, member B                          | -1.96 | 0.52 | 0.03 |
| A_51_P423509 | NM_027980 | 2310003HC | 71885  | RIKEN cDNA 2310003H01 gene                                             | -1.94 | 0.52 | 0.03 |
| A_51_P394715 | NM_029295 | Cklf      | 75458  | chemokine-like factor                                                  | -1.65 | 0.52 | 0.11 |
| A_51_P203321 | NM_145627 | Rbm10     | 236732 | RNA binding motif protein 10                                           | -1.84 | 0.52 | 0.04 |
| A_51_P446003 | NM_013764 | Dguok     | 27369  | deoxyguanosine kinase                                                  | -1.91 | 0.52 | 0.04 |
| A_52_P331997 | NM_183208 | Zmiz1     | 328365 | zinc finger, MIZ-type containing 1                                     | -1.62 | 0.52 | 0.12 |
| A_52_P78514  | AK054415  | Pik3c2g   | 18705  | phosphatidylinositol 3-kinase, C2 domain containing, gamma polypeptide | -2.20 | 0.52 | 0.01 |
| A_51_P365885 | NM_001037 | Csf1r     | 12978  | colony stimulating factor 1 receptor                                   | -1.92 | 0.52 | 0.04 |
| A_51_P167754 | NM_011492 | Stk11     | 20869  | serine/threonine kinase 11                                             | -2.12 | 0.52 | 0.01 |
| A_51_P350214 | NM_025275 | Amz2      | 13929  | archaelysin family metallopeptidase 2                                  | -2.35 | 0.52 | 0.01 |
| A_51_P203192 | NM_010774 | Mbd4      | 17193  | methyl-CpG binding domain protein 4                                    | -2.02 | 0.52 | 0.02 |
| A_51_P460067 | NM_178709 | Rnf214    | 235315 | ring finger protein 214                                                | -1.79 | 0.52 | 0.06 |
| A_51_P357664 | NM_008284 | Hras1     | 15461  | Harvey rat sarcoma virus oncogene 1                                    | -1.98 | 0.52 | 0.03 |
| A_51_P464669 | NM_009108 | Nr1h4     | 20186  | nuclear receptor subfamily 1, group H, member 4                        | -1.80 | 0.52 | 0.06 |
| A_51_P419300 | NM_026549 | Pdcd2l    | 68079  | programmed cell death 2-like                                           | -2.36 | 0.52 | 0.01 |
| A_51_P377833 | NM_133978 | Cmtm7     | 102545 | CKLF-like MARVEL transmembrane domain containing 7                     | -2.26 | 0.52 | 0.01 |
| A_51_P168092 | NM_024205 | Jkamp     | 104771 | JNK1/MAPK8-associated membrane protein                                 | -2.14 | 0.52 | 0.01 |
| A_51_P475875 | NM_027891 | Lrwd1     | 71735  | leucine-rich repeats and WD repeat domain containing 1                 | -2.07 | 0.52 | 0.02 |
| A_52_P213400 | NM_027883 | Dhx34     | 71723  | DEAH (Asp-Glu-Ala-His) box polypeptide 34                              | -2.71 | 0.52 | 0.00 |
| A_52_P223618 | NM_026555 | Rcn3      | 52377  | reticulocalbin 3, EF-hand calcium binding domain                       | -2.15 | 0.52 | 0.01 |
| A_52_P134924 | NM_027149 | Wdr20a    | 69641  | WD repeat domain 20A                                                   | -2.16 | 0.52 | 0.01 |
| A_52_P657376 | NM_197996 | Tspan15   | 70423  | tetraspanin 15                                                         | -1.72 | 0.52 | 0.07 |

|              |           |           |        |                                                                                                                                                 |       |      |      |
|--------------|-----------|-----------|--------|-------------------------------------------------------------------------------------------------------------------------------------------------|-------|------|------|
| A_52_P443167 | NM_030153 | Naa35     | 78689  | N(alpha)-acetyltransferase 35, NatC auxiliary subunit                                                                                           | -2.24 | 0.52 | 0.01 |
| A_51_P377667 | XM_887283 | NA        | NA     | NA                                                                                                                                              | -1.89 | 0.52 | 0.04 |
| A_51_P467971 | NM_146005 | Ank3      | 11735  | ankyrin 3, epithelial                                                                                                                           | -1.55 | 0.52 | 0.16 |
| A_52_P550185 | NM_026615 | Urm1      | 68205  | ubiquitin related modifier 1 homolog (S. cerevisiae)                                                                                            | -2.03 | 0.52 | 0.02 |
| A_51_P267653 | NM_153157 | Olfm3     | 229759 | olfactomedin 3                                                                                                                                  | -1.98 | 0.52 | 0.03 |
| A_52_P37091  | NA        | NA        | NA     | NA                                                                                                                                              | -1.98 | 0.52 | 0.03 |
| A_52_P308465 | NM_172775 | Plxnb1    | 235611 | plexin B1                                                                                                                                       | -1.65 | 0.52 | 0.11 |
| A_51_P251438 | AK046843  | 9130004C0 | 626123 | RIKEN cDNA 9130004C02 gene<br>dolichyl-phosphate (UDP-N-acetylglucosamine)<br>acetylglucosaminephosphotransferase 1 (GlcNAc-1-P<br>transferase) | -1.91 | 0.52 | 0.04 |
| A_51_P422208 | NM_007875 | Dpagt1    | 13478  | transferase)                                                                                                                                    | -2.07 | 0.52 | 0.02 |
| A_52_P213402 | NM_027883 | Dhx34     | 71723  | DEAH (Asp-Glu-Ala-His) box polypeptide 34                                                                                                       | -2.25 | 0.52 | 0.01 |
| A_52_P661503 | AK170208  | Depdc6    | 97998  | DEP domain containing 6                                                                                                                         | -1.43 | 0.52 | 0.24 |
| A_52_P558368 | NM_175160 | Zdhhc1    | 70796  | zinc finger, DHHC domain containing 1                                                                                                           | -2.12 | 0.52 | 0.01 |
| A_51_P471288 | AK021184  | Adam10    | 11487  | a disintegrin and metallopeptidase domain 10                                                                                                    | -1.96 | 0.52 | 0.03 |
| A_51_P232901 | NM_009923 | Cnp       | 12799  | 2',3'-cyclic nucleotide 3' phosphodiesterase                                                                                                    | -1.69 | 0.52 | 0.09 |
| A_52_P287328 | NM_133972 | Armc6     | 76813  | armadillo repeat containing 6                                                                                                                   | -2.38 | 0.52 | 0.01 |
| A_52_P569549 | NM_176953 | Lig4      | 319583 | ligase IV, DNA, ATP-dependent                                                                                                                   | -1.70 | 0.52 | 0.09 |
| A_52_P186785 | BG079886  | NA        | NA     | NA                                                                                                                                              | -1.29 | 0.52 | 0.46 |
| A_51_P253697 | NM_027186 | Rpain     | 69723  | RPA interacting protein                                                                                                                         | -2.21 | 0.52 | 0.01 |
| A_51_P174275 | NM_027866 | Colec11   | 71693  | collectin sub-family member 11                                                                                                                  | -1.87 | 0.52 | 0.04 |
| A_51_P243930 | BC070459  | Qrs1      | 76563  | glutamyl-tRNA synthase (glutamine-hydrolyzing)-like 1                                                                                           | -2.40 | 0.52 | 0.01 |
| A_52_P122830 | NM_021395 | Hyou1     | 12282  | hypoxia up-regulated 1                                                                                                                          | -1.19 | 0.52 | 0.67 |
| A_52_P180565 | BC100355  | 231006110 | 69662  | RIKEN cDNA 2310061104 gene                                                                                                                      | -1.81 | 0.52 | 0.05 |
| A_52_P860150 | AK086814  | NA        | NA     | NA                                                                                                                                              | -1.85 | 0.52 | 0.04 |
| A_51_P322000 | XM_130308 | NA        | NA     | NA                                                                                                                                              | -1.81 | 0.52 | 0.05 |
| A_52_P568805 | NM_146093 | Ubxn1     | 225896 | UBX domain protein 1                                                                                                                            | -1.98 | 0.52 | 0.03 |
| A_51_P207718 | AK164548  | Zfp826    | 414758 | zinc finger protein 826                                                                                                                         | -1.90 | 0.52 | 0.04 |
| A_52_P325388 | AK080904  | Ttc39c    | 72747  | tetratricopeptide repeat domain 39C                                                                                                             | -1.61 | 0.52 | 0.13 |
| A_51_P213691 | NM_011324 | Scnn1a    | 20276  | sodium channel, nonvoltage-gated 1 alpha                                                                                                        | -2.10 | 0.52 | 0.01 |
| A_52_P357133 | NM_053267 | Selm      | 114679 | selenoprotein M                                                                                                                                 | -1.86 | 0.52 | 0.04 |

|              |           |            |        |                                                               |       |      |      |
|--------------|-----------|------------|--------|---------------------------------------------------------------|-------|------|------|
| A_51_P195240 | NM_181649 | Ccdc75     | 53951  | coiled-coil domain containing 75                              | -1.81 | 0.52 | 0.05 |
| A_51_P252545 | NM_026447 | Ppm1m      | 67905  | protein phosphatase 1M                                        | -2.02 | 0.52 | 0.02 |
| A_52_P671525 | NM_175446 | Zmat1      | 215693 | zinc finger, matrin type 1                                    | -1.89 | 0.52 | 0.04 |
| A_52_P56768  | NM_019551 | Ttrap      | 56196  | TRAF and TNF receptor associated protein                      | -2.25 | 0.52 | 0.01 |
| A_52_P891818 | AK047526  | NA         | NA     | NA                                                            | -1.58 | 0.52 | 0.15 |
| A_51_P500869 | NA        | NA         | NA     | NA                                                            | -1.44 | 0.52 | 0.24 |
| A_51_P460048 | NM_029861 | Cnrip1     | 380686 | cannabinoid receptor interacting protein 1                    | -2.06 | 0.52 | 0.02 |
| A_51_P304819 | NA        | NA         | NA     | NA                                                            | -2.52 | 0.52 | 0.00 |
| A_51_P297963 | NM_023042 | Recql      | 19691  | RecQ protein-like                                             | -2.16 | 0.52 | 0.01 |
| A_51_P469789 | NM_016702 | Agxt       | 11611  | alanine-glyoxylate aminotransferase                           | -1.92 | 0.52 | 0.04 |
| A_51_P342813 | NM_027883 | Dhx34      | 71723  | DEAH (Asp-Glu-Ala-His) box polypeptide 34                     | -2.09 | 0.52 | 0.02 |
| A_51_P486512 | NM_134093 | Letmd1     | 68614  | LETM1 domain containing 1                                     | -1.79 | 0.52 | 0.06 |
| A_51_P125563 | NM_172719 | Gcn1l1     | 231659 | GCN1 general control of amino-acid synthesis 1-like 1 (yeast) | -2.05 | 0.52 | 0.02 |
| A_51_P417279 | AK002600  | 0610012G03 | 106264 | RIKEN cDNA 0610012G03 gene                                    | -2.15 | 0.52 | 0.01 |
| A_52_P339054 | NM_008672 | Nap1l4     | 17955  | nucleosome assembly protein 1-like 4                          | -2.46 | 0.52 | 0.00 |
| A_51_P169176 | NM_007713 | Clk3       | 102414 | CDC-like kinase 3                                             | -2.00 | 0.52 | 0.03 |
| A_52_P644072 | AK014591  | Fam160a2   | 74349  | family with sequence similarity 160, member A2                | -1.78 | 0.52 | 0.06 |
| A_52_P277641 | NM_010825 | Meis2      | 17536  | Meis homeobox 2                                               | -1.78 | 0.52 | 0.06 |
| A_52_P467438 | AK054364  | Cd99l2     | 171486 | CD99 antigen-like 2                                           | -1.80 | 0.52 | 0.05 |
| A_52_P357039 | NM_199305 | Tmem39b    | 230770 | transmembrane protein 39b                                     | -2.03 | 0.52 | 0.02 |
| A_51_P456187 | NM_008799 | Pdcd2      | 18567  | programmed cell death 2                                       | -1.54 | 0.52 | 0.16 |
| A_52_P555688 | NM_178811 | Ttc15      | 217449 | tetratricopeptide repeat domain 15                            | -1.90 | 0.52 | 0.04 |
| A_51_P454638 | NM_134073 | Kctd9      | 105440 | potassium channel tetramerisation domain containing 9         | -2.13 | 0.52 | 0.01 |
| A_51_P202074 | NM_146171 | Ncapd2     | 68298  | non-SMC condensin I complex, subunit D2                       | -2.37 | 0.52 | 0.01 |
| A_52_P107542 | BC024804  | Ccdc64     | 75665  | coiled-coil domain containing 64                              | -2.61 | 0.52 | 0.00 |
| A_51_P405766 | NM_023136 | Dtymk      | 21915  | deoxythymidylate kinase                                       | -1.48 | 0.52 | 0.20 |
| A_51_P331328 | NM_026730 | Gpihbp1    | 68453  | GPI-anchored HDL-binding protein 1                            | -1.84 | 0.52 | 0.04 |
| A_52_P671465 | AK051363  | Caprin1    | 53872  | cell cycle associated protein 1                               | -1.83 | 0.52 | 0.05 |
| A_52_P678969 | NM_145940 | Wipi1      | 52639  | WD repeat domain, phosphoinositide interacting 1              | -1.42 | 0.52 | 0.24 |
| A_51_P315795 | NM_009451 | Tubb4      | 22153  | tubulin, beta 4                                               | -2.39 | 0.52 | 0.01 |
| A_51_P408749 | AK169756  | 4933439C1  | 174476 | RIKEN cDNA 4933439C10 gene                                    | -2.42 | 0.52 | 0.00 |

|               |           |           |        |                                                                                                       |       |      |      |
|---------------|-----------|-----------|--------|-------------------------------------------------------------------------------------------------------|-------|------|------|
| A_52_P147733  | AK031634  | 4930431P1 | 73886  | RIKEN cDNA 4930431P19 gene                                                                            | -2.12 | 0.52 | 0.01 |
| A_51_P250123  | NM_028543 | Zfp763    | 73451  | zinc finger protein 763                                                                               | -2.09 | 0.52 | 0.02 |
| A_51_P497006  | NM_053188 | Srd5a2    | 94224  | steroid 5 alpha-reductase 2                                                                           | -1.22 | 0.52 | 0.58 |
| A_52_P362111  | NM_138587 | Fam3c     | 27999  | family with sequence similarity 3, member C                                                           | -1.22 | 0.52 | 0.58 |
| A_52_P140356  | NM_007590 | Calm3     | 12315  | calmodulin 3                                                                                          | -1.97 | 0.52 | 0.03 |
| A_52_P73369   | BC018353  | Hnrnpu    | 51810  | heterogeneous nuclear ribonucleoprotein U                                                             | -2.10 | 0.52 | 0.01 |
| A_51_P208537  | XM_902328 | NA        | NA     | NA                                                                                                    | -1.79 | 0.52 | 0.06 |
| A_51_P386344  | NM_172742 | Mtmr10    | 233315 | myotubularin related protein 10                                                                       | -1.32 | 0.52 | 0.40 |
| A_51_P499816  | NM_026701 | Pbld      | 68371  | phenazine biosynthesis-like protein domain containing                                                 | -1.55 | 0.52 | 0.16 |
| A_52_P184525  | AK046516  | Gm10336   | 328186 | predicted gene 10336                                                                                  | -2.58 | 0.52 | 0.00 |
| A_52_P598605  | AK147626  | Ptch1     | 19206  | patched homolog 1                                                                                     | -2.07 | 0.52 | 0.02 |
| A_51_P470751  | NM_033354 | Sec16b    | 89867  | SEC16 homolog B (S. cerevisiae)                                                                       | -1.53 | 0.52 | 0.17 |
| A_51_P286378  | AK004276  | 9430020K0 | 240185 | RIKEN cDNA 9430020K01 gene                                                                            | -2.16 | 0.52 | 0.01 |
| A_51_P262196  | NM_011069 | Pex11b    | 18632  | peroxisomal biogenesis factor 11 beta                                                                 | -2.24 | 0.52 | 0.01 |
| A_51_P448091  | NM_177888 | Zfp78     | 330463 | zinc finger protein 78                                                                                | -1.95 | 0.52 | 0.03 |
| A_52_P464437  | NM_013735 | Trp53bp1  | 27223  | transformation related protein 53 binding protein 1                                                   | -1.88 | 0.52 | 0.04 |
| A_52_P175263  | AK083867  | Pde4dip   | 83679  | phosphodiesterase 4D interacting protein (myomegalin)<br>COX11 homolog, cytochrome c oxidase assembly | -2.33 | 0.52 | 0.01 |
| A_51_P214319  | NM_199008 | Cox11     | 69802  | protein (yeast)                                                                                       | -2.17 | 0.52 | 0.01 |
| A_52_P387882  | NM_001004 | Fbll1     | 237730 | fibrillar-like 1                                                                                      | -1.98 | 0.52 | 0.03 |
| A_51_P372702  | NM_010551 | Il16      | 16170  | interleukin 16                                                                                        | -2.07 | 0.52 | 0.02 |
| A_51_P407304  | AK169346  | Aldh16a1  | 69748  | aldehyde dehydrogenase 16 family, member A1                                                           | -2.30 | 0.52 | 0.01 |
| A_52_P1053544 | NA        | NA        | NA     | NA                                                                                                    | -1.71 | 0.52 | 0.07 |
| A_52_P152631  | NM_153596 | Tmem17    | 103765 | transmembrane protein 17                                                                              | -2.39 | 0.52 | 0.01 |
| A_52_P484434  | NM_001037 | Zfp27     | 22689  | zinc finger protein 27                                                                                | -1.21 | 0.52 | 0.61 |
| A_52_P286488  | NM_177688 | H2afj     | 232440 | H2A histone family, member J<br>nudix (nucleoside diphosphate linked moiety X)-type                   | -2.07 | 0.52 | 0.02 |
| A_51_P435506  | NM_008637 | Nudt1     | 17766  | motif 1                                                                                               | -1.76 | 0.52 | 0.07 |
| A_52_P496870  | NM_025521 | 2310011J0 | 66374  | RIKEN cDNA 2310011J03 gene                                                                            | -2.01 | 0.52 | 0.02 |
| A_51_P428035  | NM_010893 | Neu1      | 18010  | neuraminidase 1                                                                                       | -2.37 | 0.52 | 0.01 |
| A_51_P106144  | NM_009564 | Zfp64     | 22722  | zinc finger protein 64                                                                                | -2.10 | 0.52 | 0.02 |

|               |           |           |        |                                                     |       |      |      |
|---------------|-----------|-----------|--------|-----------------------------------------------------|-------|------|------|
|               |           |           |        | nucleus accumbens associated 2, BEN and BTB (POZ)   |       |      |      |
| A_51_P299357  | NM_001037 | Nacc2     | 67991  | domain containing                                   | -2.33 | 0.52 | 0.01 |
| A_51_P206037  | NM_008817 | Peg3      | 18616  | paternally expressed 3                              | -1.73 | 0.52 | 0.07 |
| A_51_P253359  | NM_025670 | 5730403B1 | 66626  | RIKEN cDNA 5730403B10 gene                          | -1.62 | 0.52 | 0.12 |
| A_52_P101939  | NM_001037 | 1110034B0 | 68736  | RIKEN cDNA 1110034B05 gene                          | -1.48 | 0.52 | 0.20 |
| A_51_P118246  | NM_028672 | Fam161a   | 73873  | family with sequence similarity 161, member A       | -1.93 | 0.52 | 0.03 |
| A_52_P374556  | NM_144556 | Lgi4      | 243914 | leucine-rich repeat LGI family, member 4            | -2.10 | 0.52 | 0.01 |
| A_51_P285097  | NM_029687 | Wdr38     | 76646  | WD repeat domain 38                                 | -2.28 | 0.52 | 0.01 |
| A_51_P109742  | NM_028347 | Neil1     | 72774  | nei endonuclease VIII-like 1 (E. coli)              | -2.23 | 0.52 | 0.01 |
| A_51_P376057  | AK081004  | Bcor1     | 320376 | BCL6 co-repressor-like 1                            | -2.53 | 0.52 | 0.00 |
| A_51_P244061  | NM_183316 | Snapc5    | 330959 | small nuclear RNA activating complex, polypeptide 5 | -1.71 | 0.52 | 0.07 |
| A_52_P337427  | NM_027829 | 9030607L1 | 71564  | RIKEN cDNA 9030607L17 gene                          | -2.32 | 0.52 | 0.01 |
| A_52_P417694  | NM_027078 | Ikbip     | 67454  | IKBKB interacting protein                           | -1.91 | 0.52 | 0.04 |
| A_52_P141123  | NM_008853 | Pja1      | 18744  | praja1, RING-H2 motif containing                    | -1.40 | 0.52 | 0.28 |
| A_51_P411645  | NM_021500 | Maea      | 59003  | macrophage erythroblast attacher                    | -2.34 | 0.52 | 0.01 |
| A_52_P332917  | NM_178613 | 4933433P1 | 66787  | RIKEN cDNA 4933433P14 gene                          | -1.82 | 0.51 | 0.05 |
| A_51_P299155  | NM_133937 | 6720456B0 | 101314 | RIKEN cDNA 6720456B07 gene                          | -2.25 | 0.51 | 0.01 |
| A_52_P333921  | BC053718  | Fcho2     | 218503 | FCH domain only 2                                   | -1.99 | 0.51 | 0.03 |
| A_52_P314571  | NM_026522 | Chid1     | 68038  | chitinase domain containing 1                       | -2.36 | 0.51 | 0.01 |
| A_51_P141949  | NM_023057 | B230120H2 | 65964  | RIKEN cDNA B230120H23 gene                          | -1.95 | 0.51 | 0.03 |
| A_51_P261184  | NM_172403 | 2810021J2 | 69944  | RIKEN cDNA 2810021J22 gene                          | -2.16 | 0.51 | 0.01 |
| A_52_P215263  | AK047938  | C130022M  | 320803 | RIKEN cDNA C130022M03 gene                          | -2.12 | 0.51 | 0.01 |
| A_51_P216965  | NM_010221 | Fkbp10    | 14230  | FK506 binding protein 10                            | -1.96 | 0.51 | 0.03 |
| A_52_P544560  | XM_991082 | NA        | NA     | NA                                                  | -1.87 | 0.51 | 0.04 |
| A_52_P1149257 | AK039958  | Gm14207   | 1E+08  | predicted gene 14207                                | -2.31 | 0.51 | 0.01 |
| A_52_P1044027 | AK038195  | NA        | NA     | NA                                                  | -1.45 | 0.51 | 0.22 |
| A_51_P142046  | NM_025560 | 1810049H1 | 66431  | RIKEN cDNA 1810049H13 gene                          | -1.90 | 0.51 | 0.04 |
| A_51_P363556  | NM_198127 | Abi2      | 329165 | abl-interactor 2                                    | -2.58 | 0.51 | 0.00 |
| A_52_P222096  | NM_028888 | 4931428F0 | 74356  | RIKEN cDNA 4931428F04 gene                          | -2.80 | 0.51 | 0.00 |
| A_52_P663789  | AB093210  | Rcor1     | 217864 | REST corepressor 1                                  | -1.92 | 0.51 | 0.03 |
| A_51_P128595  | AK085036  | Mtx3      | 382793 | metaxin 3                                           | -2.03 | 0.51 | 0.02 |
| A_52_P619903  | NM_026798 | Tmem216   | 68642  | transmembrane protein 216                           | -2.16 | 0.51 | 0.01 |
| A_51_P253537  | NM_017406 | Atf6b     | 12915  | activating transcription factor 6 beta              | -2.01 | 0.51 | 0.02 |



|               |           |                 |        |                                                                     |       |      |      |
|---------------|-----------|-----------------|--------|---------------------------------------------------------------------|-------|------|------|
|               |           |                 |        | cell death-inducing DNA fragmentation factor, alpha                 |       |      |      |
| A_52_P512365  | NM_009894 | Cideb           | 12684  | subunit-like effector B                                             | -1.49 | 0.51 | 0.20 |
| A_51_P507172  | NM_175107 | 2310022A166367  |        | RIKEN cDNA 2310022A10 gene                                          | -2.07 | 0.51 | 0.02 |
| A_52_P139399  | NM_146171 | Ncapd2          | 68298  | non-SMC condensin I complex, subunit D2                             | -1.98 | 0.51 | 0.03 |
| A_51_P394244  | XM_484075 | NA              | NA     | NA                                                                  | -2.22 | 0.51 | 0.01 |
| A_51_P282883  | NM_009003 | Rab4a           | 19341  | RAB4A, member RAS oncogene family                                   | -1.66 | 0.51 | 0.11 |
| A_52_P559706  | AK148729  | Znhit6          | 229937 | zinc finger, HIT type 6                                             | -2.24 | 0.51 | 0.01 |
| A_51_P401673  | NM_053072 | Fgd6            | 13998  | FYVE, RhoGEF and PH domain containing 6                             | -1.84 | 0.51 | 0.04 |
| A_52_P941407  | AV094648  | NA              | NA     | NA                                                                  | -1.51 | 0.51 | 0.20 |
| A_52_P297741  | NM_053103 | Entpd7          | 93685  | ectonucleoside triphosphate diphosphohydrolase 7                    | -1.72 | 0.51 | 0.07 |
| A_51_P464029  | NM_021890 | Fads3           | 60527  | fatty acid desaturase 3                                             | -1.83 | 0.51 | 0.04 |
| A_51_P334979  | NM_009695 | Apoc2           | 11813  | apolipoprotein C-II                                                 | -1.79 | 0.51 | 0.06 |
| A_51_P179082  | NM_011624 | Top3b           | 21976  | topoisomerase (DNA) III beta                                        | -2.15 | 0.51 | 0.01 |
| A_52_P460050  | NA        | NA              | NA     | NA                                                                  | -2.35 | 0.51 | 0.01 |
| A_52_P58524   | NM_010893 | Neu1            | 18010  | neuraminidase 1                                                     | -2.45 | 0.51 | 0.00 |
| A_51_P441914  | NM_008290 | Hsd17b2         | 15486  | hydroxysteroid (17-beta) dehydrogenase 2                            | -1.84 | 0.51 | 0.04 |
|               |           |                 |        | potassium intermediate/small conductance calcium-                   |       |      |      |
| A_51_P296549  | NM_032397 | Kcnn1           | 84036  | activated channel, subfamily N, member 1                            | -2.34 | 0.51 | 0.01 |
| A_51_P323435  | NM_022011 | Gtf2h2          | 23894  | general transcription factor II H, polypeptide 2                    | -1.82 | 0.51 | 0.05 |
| A_52_P185136  | AK017475  | Ddo             | 70503  | D-aspartate oxidase                                                 | -2.20 | 0.51 | 0.01 |
| A_52_P96748   | AK011097  | Ttc30b          | 72421  | tetratricopeptide repeat domain 30B                                 | -1.84 | 0.51 | 0.04 |
| A_52_P220163  | NA        | NA              | NA     | NA                                                                  | -1.62 | 0.51 | 0.13 |
| A_51_P263377  | NM_177588 | Thnsl1          | 208967 | threonine synthase-like 1 (bacterial)                               | -1.88 | 0.51 | 0.04 |
| A_52_P430169  | AK147562  | Dip2b           | 239667 | DIP2 disco-interacting protein 2 homolog B (Drosophila)             | -2.74 | 0.51 | 0.00 |
| A_51_P135832  | NM_146054 | Fermt2          | 218952 | fermitin family homolog 2 (Drosophila)                              | -2.14 | 0.51 | 0.01 |
| A_51_P138348  | NM_007454 | Ap1b1           | 11764  | adaptor protein complex AP-1, beta 1 subunit                        | -1.59 | 0.51 | 0.14 |
| A_51_P464738  | NM_011400 | Slc2a1          | 20525  | solute carrier family 2 (facilitated glucose transporter), member 1 | -1.83 | 0.51 | 0.05 |
| A_52_P1013551 | NM_010941 | Nsdhl           | 18194  | NAD(P) dependent steroid dehydrogenase-like                         | -1.66 | 0.51 | 0.11 |
| A_52_P35534   | XM_287711 | E230029C0319711 |        | RIKEN cDNA E230029C05 gene                                          | -1.25 | 0.51 | 0.53 |
| A_52_P51198   | NM_028756 | Slc35a5         | 74102  | solute carrier family 35, member A5                                 | -1.43 | 0.51 | 0.24 |

|               |            |            |        |                                                                                                  |       |      |      |
|---------------|------------|------------|--------|--------------------------------------------------------------------------------------------------|-------|------|------|
| A_52_P426554  | NM_010722  | Lmnb2      | 16907  | lamin B2                                                                                         | -1.99 | 0.51 | 0.03 |
| A_52_P37593   | NM_015828  | Gne        | 50798  | glucosamine                                                                                      | -2.03 | 0.51 | 0.02 |
| A_51_P427476  | NM_024263  | Mxra8      | 74761  | matrix-remodelling associated 8                                                                  | -2.14 | 0.51 | 0.01 |
| A_52_P59931   | NM_009547  | Zfp161     | 22666  | zinc finger protein 161                                                                          | -2.59 | 0.51 | 0.00 |
| A_52_P207289  | NM_178080  | Pde4dip    | 83679  | phosphodiesterase 4D interacting protein (myomegalin)                                            | -1.94 | 0.51 | 0.03 |
| A_52_P464062  | NM_027382  | Hdac8      | 70315  | histone deacetylase 8                                                                            | -2.21 | 0.51 | 0.01 |
| A_52_P465171  | AK014060   | Spag9      | 70834  | sperm associated antigen 9                                                                       | -1.58 | 0.51 | 0.15 |
| A_51_P180140  | NM_175663  | Hist1h2ba  | 319177 | histone cluster 1, H2ba                                                                          | -1.59 | 0.51 | 0.14 |
| A_51_P340668  | NM_030256  | Bcl9l      | 80288  | B-cell CLL/lymphoma 9-like<br>Smg-6 homolog, nonsense mediated mRNA decay factor<br>(C. elegans) | -1.69 | 0.51 | 0.09 |
| A_52_P142883  | NM_001002  | Smg6       | 103677 | (C. elegans)                                                                                     | -1.92 | 0.51 | 0.04 |
| A_51_P165683  | NM_172746  | Hirip3     | 233876 | HIRA interacting protein 3                                                                       | -2.27 | 0.51 | 0.01 |
| A_51_P330125  | NM_029688  | Srxn1      | 76650  | sulfiredoxin 1 homolog (S. cerevisiae)                                                           | -1.88 | 0.51 | 0.04 |
| A_51_P384402  | NM_019454  | Dll4       | 54485  | delta-like 4 (Drosophila)                                                                        | -2.38 | 0.51 | 0.01 |
| A_51_P124008  | AK009476   | Haus5      | 71909  | HAUS augmin-like complex, subunit 5                                                              | -2.59 | 0.51 | 0.00 |
| A_51_P400107  | NM_011046  | Furin      | 18550  | furin (paired basic amino acid cleaving enzyme)                                                  | -2.36 | 0.51 | 0.01 |
| A_51_P210340  | AK011997   | 2610306M01 | 67170  | RIKEN cDNA 2610306M01 gene                                                                       | -1.98 | 0.51 | 0.03 |
| A_51_P411019  | NM_175145  | Tmem127    | 69470  | transmembrane protein 127                                                                        | -2.67 | 0.51 | 0.00 |
| A_52_P556337  | AK078477   | 4932441K1  | 353170 | RIKEN cDNA 4932441K18 gene<br>ArfGAP with SH# domain, ankyrin repeat and PH<br>domain1           | -2.59 | 0.51 | 0.00 |
| A_52_P463183  | AK147689   | Asap1      | 13196  | domain1                                                                                          | -1.62 | 0.51 | 0.12 |
| A_51_P378807  | XM_126489  | NA         | NA     | NA                                                                                               | -2.39 | 0.51 | 0.01 |
| A_51_P427663  | NM_007725  | Cnn2       | 12798  | calponin 2                                                                                       | -2.03 | 0.51 | 0.02 |
| A_52_P244803  | XM_0010017 | D630033O   | 235302 | RIKEN cDNA D630033O11 gene                                                                       | -1.98 | 0.51 | 0.03 |
| A_52_P1157176 | BB160563   | NA         | NA     | NA                                                                                               | -1.99 | 0.51 | 0.03 |
| A_51_P153124  | NM_016885  | Emcn       | 59308  | endomucin                                                                                        | -2.40 | 0.51 | 0.01 |
| A_52_P1020291 | AK037633   | Gyk        | 14933  | glycerol kinase                                                                                  | -1.44 | 0.51 | 0.24 |
| A_51_P381321  | NM_199080  | Ddx17      | 67040  | DEAD (Asp-Glu-Ala-Asp) box polypeptide 17                                                        | -2.38 | 0.51 | 0.01 |
| A_52_P595805  | BC027644   | 1810063B0  | 67509  | RIKEN cDNA 1810063B07 gene                                                                       | -2.22 | 0.51 | 0.01 |
| A_52_P1091593 | AK035003   | NA         | NA     | NA                                                                                               | -1.93 | 0.51 | 0.03 |
| A_52_P495237  | NM_008787  | Pcnt       | 18541  | pericentrin (kendrin)                                                                            | -2.41 | 0.51 | 0.00 |
| A_51_P187171  | NM_030252  | BC003266   | 80284  | cDNA sequence BC003266                                                                           | -1.93 | 0.51 | 0.03 |
| A_51_P376979  | NM_025789  | Rsph3a     | 66832  | radial spoke 3A homolog (Chlamydomonas)                                                          | -1.87 | 0.51 | 0.04 |

|              |           |                |        |                                                                               |       |      |      |
|--------------|-----------|----------------|--------|-------------------------------------------------------------------------------|-------|------|------|
| A_51_P483483 | NM_028726 | 4632404H174034 |        | RIKEN cDNA 4632404H12 gene                                                    | -2.14 | 0.51 | 0.01 |
| A_51_P158772 | NM_170777 | Elof1          | 66126  | elongation factor 1 homolog (ELF1, <i>S. cerevisiae</i> )                     | -2.35 | 0.51 | 0.01 |
| A_52_P471282 | NM_144878 | Fmo4           | 226564 | flavin containing monooxygenase 4                                             | -1.63 | 0.51 | 0.12 |
| A_51_P388801 | NM_178385 | Tbcc           | 72726  | tubulin-specific chaperone C                                                  | -2.46 | 0.51 | 0.00 |
| A_51_P430423 | NM_007398 | Ada            | 11486  | adenosine deaminase                                                           | -1.89 | 0.51 | 0.04 |
| A_51_P371241 | AK173333  | Gm608          | 207806 | predicted gene 608                                                            | -2.13 | 0.51 | 0.01 |
| A_52_P104769 | NM_011711 | Fmnl3          | 22379  | formin-like 3                                                                 | -2.39 | 0.51 | 0.01 |
| A_51_P502068 | NA        | NA             | NA     | NA                                                                            | -1.67 | 0.51 | 0.10 |
| A_51_P237307 | AK122468  | Plekhg1        | 213783 | pleckstrin homology domain containing, family G (with RhoGef domain) member 1 | -2.64 | 0.51 | 0.00 |
| A_52_P331212 | NA        | NA             | NA     | NA                                                                            | -1.97 | 0.51 | 0.03 |
| A_52_P295906 | AK049081  | Ammecr1l       | 225339 | AMME chromosomal region gene 1-like                                           | -2.26 | 0.51 | 0.01 |
| A_51_P112308 | NM_026931 | 1810011O169068 |        | RIKEN cDNA 1810011O10 gene                                                    | -1.25 | 0.51 | 0.55 |
| A_51_P483220 | NM_008378 | Impact         | 16210  | imprinted and ancient                                                         | -1.85 | 0.51 | 0.04 |
| A_51_P120137 | NM_201361 | Fam82a1        | 381110 | family with sequence similarity 82, member A1                                 | -2.40 | 0.51 | 0.00 |
| A_51_P239137 | NM_009568 | Zfp94          | 22756  | zinc finger protein 94                                                        | -1.92 | 0.51 | 0.03 |
| A_51_P371311 | NM_018861 | Slc1a4         | 55963  | solute carrier family 1 (glutamate/neutral amino acid transporter), member 4  | -1.69 | 0.51 | 0.09 |
| A_52_P180310 | BF100712  | Copz2          | 56358  | coatomer protein complex, subunit zeta 2                                      | -2.44 | 0.51 | 0.00 |
| A_51_P443443 | AY040842  | Gon4l          | 76022  | gon-4-like ( <i>C.elegans</i> )                                               | -1.95 | 0.51 | 0.03 |
| A_51_P436189 | NM_026675 | Nudt22         | 68323  | nudix (nucleoside diphosphate linked moiety X)-type motif 22                  | -2.33 | 0.51 | 0.01 |
| A_51_P386810 | NM_177910 | Gmppb          | 331026 | GDP-mannose pyrophosphorylase B                                               | -1.13 | 0.51 | 0.86 |
| A_52_P507169 | AK005177  | 2810449D167234 |        | RIKEN cDNA 2810449D17 gene                                                    | -1.95 | 0.51 | 0.03 |
| A_51_P225630 | NM_153144 | Ggnbp2         | 217039 | gametogenetin binding protein 2                                               | -2.06 | 0.51 | 0.02 |
| A_52_P235278 | NM_153556 | Pms1           | 227099 | postmeiotic segregation increased 1 ( <i>S. cerevisiae</i> )                  | -1.88 | 0.51 | 0.04 |
| A_51_P267314 | NM_178650 | Tbc1d10c       | 108995 | TBC1 domain family, member 10c                                                | -2.25 | 0.51 | 0.01 |
| A_51_P251754 | AV111327  | NA             | NA     | NA                                                                            | -1.75 | 0.51 | 0.07 |
| A_51_P363948 | NM_007712 | Clk2           | 12748  | CDC-like kinase 2                                                             | -2.11 | 0.51 | 0.01 |
| A_51_P454696 | BC028441  | Mosc1          | 66112  | MOCO sulphurase C-terminal domain containing 1                                | -2.39 | 0.51 | 0.01 |
| A_52_P53698  | NM_011489 | Stat5b         | 20851  | signal transducer and activator of transcription 5B                           | -1.98 | 0.51 | 0.03 |
| A_51_P385697 | NM_010795 | Mgat3          | 17309  | mannoside acetylglucosaminyltransferase 3                                     | -1.26 | 0.51 | 0.53 |

|              |           |           |        |                                                                              |       |      |      |
|--------------|-----------|-----------|--------|------------------------------------------------------------------------------|-------|------|------|
| A_52_P484799 | NM_025679 | Sike1     | 66641  | suppressor of IKBKE 1                                                        | -2.25 | 0.51 | 0.01 |
| A_52_P325443 | NM_172525 | Arhgap29  | 214137 | Rho GTPase activating protein 29                                             | -1.82 | 0.51 | 0.05 |
| A_51_P137336 | NM_009864 | Cdh1      | 12550  | cadherin 1                                                                   | -1.61 | 0.51 | 0.13 |
| A_52_P266320 | XM_111900 | NA        | NA     | NA                                                                           | -1.94 | 0.51 | 0.03 |
| A_51_P470448 | NM_198033 | Setx      | 269254 | senataxin                                                                    | -1.84 | 0.51 | 0.04 |
| A_51_P384756 | NM_010697 | Ldb1      | 16825  | LIM domain binding 1                                                         | -2.62 | 0.51 | 0.00 |
| A_51_P191520 | NM_019990 | Stard10   | 56018  | START domain containing 10                                                   | -2.35 | 0.51 | 0.01 |
| A_52_P415735 | NM_013843 | Zfp53     | 24132  | zinc finger protein 53                                                       | -1.21 | 0.50 | 0.61 |
| A_52_P432919 | NM_031874 | Rab3d     | 19340  | RAB3D, member RAS oncogene family                                            | -2.01 | 0.50 | 0.02 |
| A_52_P35928  | AK077363  | Ccdc93    | 70829  | coiled-coil domain containing 93                                             | -2.07 | 0.50 | 0.02 |
| A_52_P135276 | NM_207220 | Gpr137    | 107173 | G protein-coupled receptor 137                                               | -2.11 | 0.50 | 0.01 |
| A_52_P582424 | NM_178400 | 9130221H1 | 77124  | RIKEN cDNA 9130221H12 gene                                                   | -1.93 | 0.50 | 0.03 |
| A_51_P216726 | NM_029339 | Ccdc101   | 75565  | coiled-coil domain containing 101<br>protein-L-isoaspartate (D-aspartate) O- | -2.62 | 0.50 | 0.00 |
| A_51_P197509 | NM_153594 | Pcmt2     | 245867 | methyltransferase domain containing 2                                        | -2.39 | 0.50 | 0.01 |
| A_52_P262250 | NM_007682 | Cenpb     | 12616  | centromere protein B                                                         | -2.63 | 0.50 | 0.00 |
| A_51_P429212 | NM_028749 | Npl       | 74091  | N-acetylneuraminate pyruvate lyase                                           | -1.95 | 0.50 | 0.03 |
| A_52_P438682 | BC064745  | Wdr33     | 74320  | WD repeat domain 33                                                          | -2.52 | 0.50 | 0.00 |
| A_52_P442585 | NM_010365 | Gtf2i     | 14886  | general transcription factor II I                                            | -1.98 | 0.50 | 0.03 |
| A_52_P68735  | NM_001013 | Shf       | 435684 | Src homology 2 domain containing F                                           | -2.34 | 0.50 | 0.01 |
| A_51_P284466 | NM_023910 | Tsc22d4   | 78829  | TSC22 domain family, member 4                                                | -2.37 | 0.50 | 0.01 |
| A_51_P244993 | AK018024  | Rap2a     | 76108  | RAS related protein 2a                                                       | -1.94 | 0.50 | 0.03 |
| A_51_P103865 | NM_027242 | 2010007H1 | 69871  | RIKEN cDNA 2010007H12 gene                                                   | -2.05 | 0.50 | 0.02 |
| A_51_P301930 | BC030317  | Lrrc17    | 74511  | leucine rich repeat containing 17                                            | -1.12 | 0.50 | 0.86 |
| A_52_P65077  | AK052282  | Zfp820    | 75424  | zinc finger protein 820                                                      | -2.33 | 0.50 | 0.01 |
| A_52_P57013  | NM_008750 | Nxn       | 18230  | nucleoredoxin                                                                | -2.10 | 0.50 | 0.01 |
| A_51_P196862 | AK090143  | Amdhd1    | 71761  | amidohydrolase domain containing 1                                           | -1.96 | 0.50 | 0.03 |
| A_52_P394385 | NM_026451 | 1600012H0 | 67912  | RIKEN cDNA 1600012H06 gene                                                   | -2.70 | 0.50 | 0.00 |
| A_51_P511112 | NM_008197 | H1f0      | 14958  | H1 histone family, member 0                                                  | -1.77 | 0.50 | 0.06 |
| A_52_P547273 | AK018161  | Dock4     | 238130 | dedicator of cytokinesis 4                                                   | -1.51 | 0.50 | 0.20 |
| A_51_P334318 | NM_027363 | 2010110P0 | 70261  | RIKEN cDNA 2010110P09 gene                                                   | -1.78 | 0.50 | 0.06 |
| A_52_P111562 | NM_153580 | Ino80e    | 233875 | INO80 complex subunit E                                                      | -2.23 | 0.50 | 0.01 |
| A_52_P174771 | NM_174874 | Atg4b     | 66615  | autophagy-related 4B (yeast)                                                 | -2.43 | 0.50 | 0.00 |
| A_52_P117966 | NM_026546 | Fam173b   | 68073  | family with sequence similarity 173, member B                                | -1.84 | 0.50 | 0.04 |

|              |           |          |        |                                                                                           |       |      |      |
|--------------|-----------|----------|--------|-------------------------------------------------------------------------------------------|-------|------|------|
| A_51_P416625 | NM_026325 | Tmem179b | 67706  | transmembrane protein 179B                                                                | -2.39 | 0.50 | 0.01 |
| A_51_P496054 | NM_080855 | Zcchc14  | 142682 | zinc finger, CCHC domain containing 14                                                    | -1.26 | 0.50 | 0.53 |
| A_51_P191893 | AK163489  | 2410022M | 69755  | RIKEN cDNA 2410022M11 gene                                                                | -1.86 | 0.50 | 0.04 |
| A_51_P479052 | NM_033074 | Tars     | 110960 | threonyl-tRNA synthetase                                                                  | -2.14 | 0.50 | 0.01 |
| A_51_P326609 | BC011407  | Golga2   | 99412  | golgi autoantigen, golgin subfamily a, 2                                                  | -2.05 | 0.50 | 0.02 |
| A_51_P114094 | NM_153508 | Clstn3   | 232370 | calsyntenin 3                                                                             | -2.20 | 0.50 | 0.01 |
| A_52_P446625 | NM_001024 | AW555464 | 217882 | expressed sequence AW555464                                                               | -2.12 | 0.50 | 0.01 |
| A_52_P121486 | NM_080465 | Kcnn2    | 140492 | potassium intermediate/small conductance calcium-activated channel, subfamily N, member 2 | -1.39 | 0.50 | 0.30 |
| A_51_P299339 | NM_023184 | Klf15    | 66277  | Kruppel-like factor 15                                                                    | -1.40 | 0.50 | 0.28 |
| A_52_P205797 | NM_177683 | Vgll4    | 232334 | vestigial like 4 (Drosophila)                                                             | -2.03 | 0.50 | 0.02 |
| A_51_P298538 | NM_145404 | Prmt7    | 214572 | protein arginine N-methyltransferase 7                                                    | -1.83 | 0.50 | 0.05 |
| A_51_P219061 | NM_026936 | Oxa1l    | 69089  | oxidase assembly 1-like                                                                   | -1.76 | 0.50 | 0.07 |
| A_51_P365912 | NM_026238 | Narfl    | 67563  | nuclear prelamin A recognition factor-like                                                | -2.68 | 0.50 | 0.00 |
| A_51_P233947 | NM_144522 | Tbc1d10b | 68449  | TBC1 domain family, member 10b                                                            | -1.98 | 0.50 | 0.03 |
| A_51_P155018 | NM_022887 | Tsc1     | 64930  | tuberous sclerosis 1                                                                      | -2.19 | 0.50 | 0.01 |
| A_52_P255782 | NM_175316 | Slco2b1  | 101488 | solute carrier organic anion transporter family, member 2b1                               | -2.53 | 0.50 | 0.00 |
| A_52_P249687 | AK002941  | 0710001D | 67679  | RIKEN cDNA 0710001D07 gene                                                                | -1.80 | 0.50 | 0.06 |
| A_51_P143468 | NM_178771 | Klhl26   | 234378 | kelch-like 26 (Drosophila)                                                                | -1.68 | 0.50 | 0.09 |
| A_52_P144848 | AI843133  | NA       | NA     | NA                                                                                        | -2.61 | 0.50 | 0.00 |
| A_51_P227785 | AK033046  | Klhl3    | 627648 | kelch-like 3 (Drosophila)                                                                 | -2.43 | 0.50 | 0.00 |
| A_52_P144173 | NM_008317 | Hyal1    | 15586  | hyaluronoglucosaminidase 1                                                                | -1.49 | 0.50 | 0.20 |
| A_51_P485499 | NM_016849 | Irf3     | 54131  | interferon regulatory factor 3                                                            | -2.20 | 0.50 | 0.01 |
| A_52_P208613 | NM_175027 | Fancc    | 237211 | Fanconi anemia, complementation group B                                                   | -2.04 | 0.50 | 0.02 |
| A_52_P392833 | NA        | NA       | NA     | NA                                                                                        | -1.96 | 0.50 | 0.03 |
| A_52_P111244 | NA        | NA       | NA     | NA                                                                                        | -2.37 | 0.50 | 0.01 |
| A_51_P287606 | NM_028484 | 1700037C | 173261 | RIKEN cDNA 1700037C18 gene                                                                | -2.09 | 0.50 | 0.02 |
| A_52_P187987 | AK009064  | 2310001H | 176432 | RIKEN cDNA 2310001H17 gene                                                                | -1.72 | 0.50 | 0.07 |
| A_51_P368110 | NM_028211 | 2210016L | 272357 | RIKEN cDNA 2210016L21 gene                                                                | -1.49 | 0.50 | 0.20 |
| A_51_P223709 | NM_080850 | Pask     | 269224 | PAS domain containing serine/threonine kinase                                             | -2.51 | 0.50 | 0.00 |
| A_51_P275623 | NM_015828 | Gne      | 50798  | glucosamine                                                                               | -2.01 | 0.50 | 0.02 |
| A_51_P326483 | NM_023292 | Pus3     | 67049  | pseudouridine synthase 3                                                                  | -2.31 | 0.50 | 0.01 |

|              |           |           |        |                                                         |       |      |      |
|--------------|-----------|-----------|--------|---------------------------------------------------------|-------|------|------|
| A_51_P450365 | NM_153162 | Txnrd3    | 232223 | thioredoxin reductase 3                                 | -2.23 | 0.50 | 0.01 |
|              |           |           |        | SWI/SNF related, matrix associated, actin dependent     |       |      |      |
| A_51_P423880 | NM_025891 | Smarcd3   | 66993  | regulator of chromatin, subfamily d, member 3           | -2.52 | 0.50 | 0.00 |
| A_52_P569507 | NM_019637 | Styx      | 56291  | serine/threonine/tyrosine interaction protein           | -2.41 | 0.50 | 0.00 |
| A_51_P117995 | NM_021514 | Pfkm      | 18642  | phosphofructokinase, muscle                             | -1.86 | 0.50 | 0.04 |
| A_51_P412640 | NM_025689 | Ccdc51    | 66658  | coiled-coil domain containing 51                        | -2.04 | 0.50 | 0.02 |
| A_51_P119077 | NM_011018 | Sqstm1    | 18412  | sequestosome 1                                          | -1.72 | 0.50 | 0.07 |
| A_51_P242414 | AK147274  | NA        | NA     | NA                                                      | -2.15 | 0.50 | 0.01 |
| A_52_P172563 | NM_001025 | Dffa      | 13347  | DNA fragmentation factor, alpha subunit                 | -2.62 | 0.50 | 0.00 |
| A_52_P329054 | NM_023873 | Cep70     | 68121  | centrosomal protein 70                                  | -1.95 | 0.50 | 0.03 |
| A_51_P220062 | NM_008609 | Mmp15     | 17388  | matrix metalloproteinase 15                             | -1.57 | 0.50 | 0.15 |
| A_51_P396297 | NM_175185 | Hsdl1     | 72552  | hydroxysteroid dehydrogenase like 1                     | -1.66 | 0.50 | 0.11 |
| A_52_P391718 | NM_009079 | Rpl22     | 19934  | ribosomal protein L22                                   | -2.20 | 0.50 | 0.01 |
| A_52_P716154 | AV242843  | NA        | NA     | NA                                                      | -1.79 | 0.50 | 0.06 |
| A_51_P174415 | NM_170755 | Fam134a   | 227298 | family with sequence similarity 134, member A           | -2.61 | 0.50 | 0.00 |
| A_52_P566055 | NM_145706 | Nup43     | 69912  | nucleoporin 43                                          | -2.30 | 0.50 | 0.01 |
|              |           |           |        | insulin-like growth factor binding protein, acid labile |       |      |      |
| A_51_P277088 | NM_008340 | Igfals    | 16005  | subunit                                                 | -1.91 | 0.50 | 0.04 |
| A_52_P517905 | BC033459  | Numb      | 18222  | numb gene homolog (Drosophila)                          | -1.83 | 0.50 | 0.04 |
|              |           |           |        | phosphoprotein associated with glycosphingolipid        |       |      |      |
| A_52_P389484 | AK041695  | Pag1      | 94212  | microdomains 1                                          | -2.15 | 0.50 | 0.01 |
| A_51_P431107 | NM_013872 | Pmm1      | 29858  | phosphomannomutase 1                                    | -2.28 | 0.50 | 0.01 |
| A_51_P472323 | NM_015792 | Fbxo18    | 50755  | F-box protein 18                                        | -2.66 | 0.50 | 0.00 |
| A_52_P616229 | NM_026622 | 3110057O1 | 269423 | RIKEN cDNA 3110057O12 gene                              | -2.29 | 0.50 | 0.01 |
| A_52_P428446 | NM_011650 | Tsn       | 22099  | translin                                                | -1.69 | 0.50 | 0.09 |
| A_51_P172727 | NM_029081 | 5730419I0 | 74741  | RIKEN cDNA 5730419I09 gene                              | -1.66 | 0.50 | 0.11 |
| A_52_P645122 | NA        | NA        | NA     | NA                                                      | -2.54 | 0.50 | 0.00 |
| A_52_P61691  | NM_181858 | Cd59b     | 333883 | CD59b antigen                                           | -1.79 | 0.50 | 0.06 |
| A_51_P185175 | NM_010219 | Fkbp4     | 14228  | FK506 binding protein 4                                 | -1.81 | 0.50 | 0.05 |
| A_51_P422335 | BC055817  | Zfp420    | 233058 | zinc finger protein 420                                 | -2.25 | 0.50 | 0.01 |
| A_52_P77245  | NM_172277 | Snx8      | 231834 | sorting nexin 8                                         | -2.31 | 0.50 | 0.01 |
| A_51_P414047 | AK047328  | NA        | NA     | NA                                                      | -2.13 | 0.50 | 0.01 |
| A_52_P334677 | NM_007715 | Clock     | 12753  | circadian locomotor output cycles kaput                 | -1.57 | 0.50 | 0.15 |

|              |           |                 |        |                                                                                       |       |      |      |
|--------------|-----------|-----------------|--------|---------------------------------------------------------------------------------------|-------|------|------|
| A_51_P338961 | XM_130565 | NA              | NA     | NA                                                                                    | -2.27 | 0.50 | 0.01 |
| A_51_P355774 | NM_026921 | Isca1           | 69046  | iron-sulfur cluster assembly 1 homolog ( <i>S. cerevisiae</i> )                       | -2.49 | 0.50 | 0.00 |
| A_52_P191210 | AK028720  | 9530091C0320440 |        | RIKEN cDNA 9530091C08 gene                                                            | -2.12 | 0.50 | 0.01 |
| A_52_P12806  | NM_199472 | NA              | NA     | NA                                                                                    | -1.40 | 0.50 | 0.28 |
| A_51_P452875 | NA        | NA              | NA     | NA                                                                                    | -1.70 | 0.50 | 0.09 |
| A_52_P470869 | AK138175  | Mipol1          | 73490  | mirror-image polydactyly gene 1 homolog (human)                                       | -1.88 | 0.50 | 0.04 |
| A_52_P677956 | NM_026951 | Pex11c          | 69129  | peroxisomal biogenesis factor 11 gamma                                                | -1.77 | 0.50 | 0.06 |
| A_51_P231587 | XM_194000 | NA              | NA     | NA                                                                                    | -2.44 | 0.50 | 0.00 |
| A_51_P425232 | NM_027764 | Rcbtb1          | 71330  | regulator of chromosome condensation (RCC1) and BTB (POZ) domain containing protein 1 | -2.23 | 0.50 | 0.01 |
| A_52_P78023  | NM_172397 | Limd2           | 67803  | LIM domain containing 2                                                               | -2.11 | 0.50 | 0.01 |
| A_51_P379230 | NM_001025 | Maf             | 17132  | avian musculoaponeurotic fibrosarcoma (v-maf) AS42 oncogene homolog                   | -2.41 | 0.50 | 0.00 |
| A_51_P151516 | AK045519  | B230208H1320273 |        | RIKEN cDNA B230208H11 gene                                                            | -2.18 | 0.50 | 0.01 |
| A_51_P314521 | NM_138743 | Fam165b         | 68936  | family with sequence similarity 165, member B                                         | -1.99 | 0.50 | 0.03 |
| A_52_P309718 | XM_897688 | D14Abb1e        | 218850 | DNA segment, Chr 14, Abbott 1 expressed                                               | -2.07 | 0.50 | 0.02 |
| A_51_P166325 | BC092074  | Ttc5            | 219022 | tetratricopeptide repeat domain 5                                                     | -1.42 | 0.50 | 0.27 |
| A_51_P140597 | NM_178930 | Gbf1            | 107338 | golgi-specific brefeldin A-resistance factor 1                                        | -2.01 | 0.50 | 0.02 |
| A_52_P366980 | NM_028841 | Tspan17         | 74257  | tetraspanin 17                                                                        | -2.38 | 0.50 | 0.01 |
| A_51_P411757 | NM_172945 | Ankrd13b        | 268445 | ankyrin repeat domain 13b                                                             | -2.28 | 0.50 | 0.01 |
| A_51_P359078 | NM_021329 | Rangrf          | 57785  | RAN guanine nucleotide release factor                                                 | -1.61 | 0.50 | 0.13 |
| A_51_P437426 | NM_146069 | Lrrc33          | 224109 | leucine rich repeat containing 33                                                     | -2.70 | 0.50 | 0.00 |
| A_51_P329541 | NM_030729 | Nckipsd         | 80987  | NCK interacting protein with SH3 domain                                               | -2.28 | 0.50 | 0.01 |
| A_51_P121466 | NM_025609 | Tab1            | 66513  | TGF-beta activated kinase 1/MAP3K7 binding protein 1                                  | -2.15 | 0.50 | 0.01 |
| A_52_P168575 | NM_001013 | Fam169b         | 434197 | family with sequence similarity 169, member B                                         | -2.04 | 0.50 | 0.02 |
| A_51_P431916 | NM_011551 | Ubtf            | 21429  | upstream binding transcription factor, RNA polymerase I                               | -2.33 | 0.50 | 0.01 |
| A_52_P324530 | NM_023503 | Ing2            | 69260  | inhibitor of growth family, member 2                                                  | -2.02 | 0.50 | 0.02 |
| A_51_P259773 | NM_020258 | Slc37a2         | 56857  | solute carrier family 37 (glycerol-3-phosphate transporter), member 2                 | -1.93 | 0.50 | 0.03 |
| A_52_P436094 | NM_133900 | Psph            | 100678 | phosphoserine phosphatase                                                             | -1.80 | 0.50 | 0.05 |

|              |           |           |        |                                                                                  |       |      |      |
|--------------|-----------|-----------|--------|----------------------------------------------------------------------------------|-------|------|------|
| A_52_P438530 | NM_013852 | Abcf3     | 27406  | ATP-binding cassette, sub-family F (GCN20), member 3                             | -2.23 | 0.50 | 0.01 |
| A_51_P494775 | NM_198023 | Rcor1     | 217864 | REST corepressor 1                                                               | -1.84 | 0.50 | 0.04 |
| A_51_P356760 | NM_138315 | Mical1    | 171580 | microtubule associated monooxygenase, calponin and LIM domain containing 1       | -1.55 | 0.50 | 0.16 |
| A_52_P336958 | AK154331  | 9430020K0 | 240185 | RIKEN cDNA 9430020K01 gene                                                       | -2.34 | 0.50 | 0.01 |
| A_52_P625277 | NM_183220 | Accs      | 329470 | 1-aminocyclopropane-1-carboxylate synthase homolog (Arabidopsis)(non-functional) | -2.36 | 0.50 | 0.01 |
| A_51_P320434 | NM_001002 | Smg6      | 103677 | Smg-6 homolog, nonsense mediated mRNA decay factor (C. elegans)                  | -1.46 | 0.50 | 0.21 |
| A_52_P58471  | NM_199199 | Tmem199   | 195040 | transmembrane protein 199                                                        | -2.27 | 0.50 | 0.01 |
| A_51_P389421 | NM_023480 | Fahd1     | 68636  | fumarylacetoacetate hydrolase domain containing 1                                | -2.45 | 0.50 | 0.00 |
| A_52_P328621 | NA        | NA        | NA     | NA                                                                               | -1.91 | 0.50 | 0.04 |
| A_52_P323525 | NM_001003 | Arhgef11  | 213498 | Rho guanine nucleotide exchange factor (GEF) 11                                  | -2.22 | 0.50 | 0.01 |
| A_52_P554411 | NM_010148 | Epn2      | 13855  | epsin 2                                                                          | -2.28 | 0.50 | 0.01 |
| A_51_P415475 | NM_053246 | Dok4      | 114255 | docking protein 4                                                                | -2.35 | 0.49 | 0.01 |
| A_51_P170577 | AK011422  | Nup43     | 69912  | nucleoporin 43                                                                   | -2.30 | 0.49 | 0.01 |
| A_51_P109541 | NM_001015 | E130308A1 | 230259 | RIKEN cDNA E130308A19 gene                                                       | -2.09 | 0.49 | 0.02 |
| A_51_P304239 | NM_010729 | Loxl1     | 16949  | lysyl oxidase-like 1                                                             | -2.28 | 0.49 | 0.01 |
| A_52_P308413 | AK007434  | 1810011H1 | 169069 | RIKEN cDNA 1810011H11 gene                                                       | -2.17 | 0.49 | 0.01 |
| A_52_P59285  | AK162474  | 2810410L2 | 1E+08  | RIKEN cDNA 2810410L24 gene                                                       | -2.11 | 0.49 | 0.01 |
| A_51_P493285 | NM_007828 | Dapk3     | 13144  | death-associated protein kinase 3                                                | -2.06 | 0.49 | 0.02 |
| A_51_P468037 | NM_026698 | Tmem129   | 68366  | transmembrane protein 129                                                        | -2.09 | 0.49 | 0.02 |
| A_51_P355820 | BC027683  | Zfp688    | 69234  | zinc finger protein 688                                                          | -2.50 | 0.49 | 0.00 |
| A_51_P126702 | NM_030143 | Ddit4l    | 73284  | DNA-damage-inducible transcript 4-like                                           | -1.48 | 0.49 | 0.20 |
| A_51_P218216 | AK048177  | Cnot1     | 234594 | CCR4-NOT transcription complex, subunit 1                                        | -2.35 | 0.49 | 0.01 |
| A_52_P532323 | NM_001038 | Marvel2   | 218518 | MARVEL (membrane-associating) domain containing 2                                | -1.39 | 0.49 | 0.28 |
| A_51_P141634 | NM_173432 | Pskh1     | 244631 | protein serine kinase H1                                                         | -2.24 | 0.49 | 0.01 |
| A_52_P606826 | NM_029988 | Pigh      | 110417 | phosphatidylinositol glycan anchor biosynthesis, class H                         | -2.21 | 0.49 | 0.01 |
| A_52_P843910 | AK076876  | NA        | NA     | NA                                                                               | -1.91 | 0.49 | 0.04 |
| A_52_P419162 | AK129156  | Cyhr1     | 54151  | cysteine and histidine rich 1                                                    | -1.76 | 0.49 | 0.07 |



|              |           |           |        |                                                                               |       |      |      |
|--------------|-----------|-----------|--------|-------------------------------------------------------------------------------|-------|------|------|
| A_52_P538673 | NM_010197 | Fgf1      | 14164  | fibroblast growth factor 1                                                    | -2.58 | 0.49 | 0.00 |
| A_52_P511381 | NM_011571 | Tesk1     | 21754  | testis specific protein kinase 1                                              | -2.16 | 0.49 | 0.01 |
| A_51_P473940 | NA        | NA        | NA     | NA                                                                            | -1.59 | 0.49 | 0.14 |
| A_51_P236314 | AK004787  | Ndst1     | 15531  | N-deacetylase/N-sulfotransferase (heparan glucosaminy) 1                      | -2.68 | 0.49 | 0.00 |
| A_51_P354706 | NM_010094 | Lefty1    | 13590  | left right determination factor 1                                             | -1.83 | 0.49 | 0.05 |
| A_52_P207614 | XM_992182 | NA        | NA     | NA                                                                            | -2.37 | 0.49 | 0.01 |
| A_51_P493175 | NM_025964 | Fam119a   | 67099  | family with sequence similarity 119, member A                                 | -2.42 | 0.49 | 0.00 |
| A_51_P177518 | NM_025318 | Tmem93    | 66048  | transmembrane protein 93                                                      | -2.52 | 0.49 | 0.00 |
| A_51_P325491 | NM_025368 | Josd2     | 66124  | Josephin domain containing 2                                                  | -2.22 | 0.49 | 0.01 |
| A_52_P174328 | NM_178080 | Pde4dip   | 83679  | phosphodiesterase 4D interacting protein (myomegalin)                         | -1.75 | 0.49 | 0.07 |
| A_51_P328300 | NM_009787 | Pdia4     | 12304  | protein disulfide isomerase associated 4                                      | -1.49 | 0.49 | 0.20 |
| A_51_P477875 | NM_011393 | Slc1a2    | 20511  | solute carrier family 1 (glial high affinity glutamate transporter), member 2 | -1.66 | 0.49 | 0.11 |
| A_51_P316616 | NM_174992 | Smagp     | 207818 | small cell adhesion glycoprotein                                              | -2.20 | 0.49 | 0.01 |
| A_52_P225331 | NM_024438 | Dusp19    | 68082  | dual specificity phosphatase 19                                               | -2.06 | 0.49 | 0.02 |
| A_52_P626438 | NA        | NA        | NA     | NA                                                                            | -1.76 | 0.49 | 0.07 |
| A_52_P427524 | NM_133998 | 1810008A1 | 108707 | RIKEN cDNA 1810008A18 gene                                                    | -2.79 | 0.49 | 0.00 |
| A_52_P589591 | NM_015810 | Polg2     | 50776  | polymerase (DNA directed), gamma 2, accessory subunit                         | -2.32 | 0.49 | 0.01 |
| A_51_P127186 | NM_026799 | Rnasen    | 14000  | ribonuclease III, nuclear                                                     | -2.03 | 0.49 | 0.02 |
| A_51_P248304 | NM_178027 | Vps26b    | 69091  | vacuolar protein sorting 26 homolog B (yeast)                                 | -2.51 | 0.49 | 0.00 |
| A_51_P167660 | NM_175157 | 2610204G2 | 70448  | RIKEN cDNA 2610204G22 gene                                                    | -2.73 | 0.49 | 0.00 |
| A_52_P338162 | NM_138303 | Yipf2     | 74766  | Yip1 domain family, member 2                                                  | -1.69 | 0.49 | 0.09 |
| A_51_P133792 | NM_175097 | Prickle3  | 54630  | prickle homolog 3 (Drosophila)                                                | -2.24 | 0.49 | 0.01 |
| A_52_P188425 | NM_001039 | Prosc     | 114863 | proline synthetase co-transcribed                                             | -1.62 | 0.49 | 0.12 |
| A_52_P54561  | NM_010829 | Msh3      | 17686  | mutS homolog 3 (E. coli)                                                      | -1.93 | 0.49 | 0.03 |
| A_52_P584078 | NM_152894 | Pop1      | 67724  | processing of precursor 1, ribonuclease P/MRP family, (S. cerevisiae)         | -1.63 | 0.49 | 0.11 |
| A_51_P502838 | AK039198  | Ube2h     | 22214  | ubiquitin-conjugating enzyme E2H                                              | -1.87 | 0.49 | 0.04 |
| A_51_P409825 | NM_022424 | Fndc4     | 64339  | fibronectin type III domain containing 4                                      | -2.35 | 0.49 | 0.01 |
| A_51_P161413 | AK162153  | Usp30     | 100756 | ubiquitin specific peptidase 30                                               | -2.66 | 0.49 | 0.00 |

|              |           |            |        |                                                                      |       |      |      |
|--------------|-----------|------------|--------|----------------------------------------------------------------------|-------|------|------|
| A_51_P498947 | NM_026371 | Loh12cr1   | 67774  | loss of heterozygosity, 12, chromosomal region 1<br>homolog (human)  | -2.26 | 0.49 | 0.01 |
| A_52_P642056 | NM_053194 | Ric8       | 101489 | resistance to inhibitors of cholinesterase 8 homolog (C.<br>elegans) | -2.40 | 0.49 | 0.01 |
| A_52_P432815 | AK086714  | 2310079N02 | 66566  | RIKEN cDNA 2310079N02 gene                                           | -2.56 | 0.49 | 0.00 |
| A_51_P286792 | NM_031494 | Zfp275     | 27081  | zinc finger protein 275                                              | -1.72 | 0.49 | 0.07 |
| A_52_P127325 | NM_178885 | AI182371   | 98870  | expressed sequence AI182371                                          | -2.30 | 0.49 | 0.01 |
| A_51_P381239 | NM_153563 | Fam40a     | 229707 | family with sequence similarity 40, member A                         | -2.38 | 0.49 | 0.01 |
| A_51_P500226 | NM_028024 | Nkiras2    | 71966  | NFKB inhibitor interacting Ras-like protein 2                        | -2.20 | 0.49 | 0.01 |
| A_52_P325918 | AK148051  | 5930430L01 | 319982 | RIKEN cDNA 5930430L01 gene                                           | -2.10 | 0.49 | 0.01 |
| A_51_P355151 | AK013788  | Camk2n2    | 73047  | calcium/calmodulin-dependent protein kinase II<br>inhibitor 2        | -2.09 | 0.49 | 0.02 |
| A_52_P96772  | AK012010  | Pgp        | 67078  | phosphoglycolate phosphatase                                         | -2.36 | 0.49 | 0.01 |
| A_52_P577624 | NM_138664 | Dnajc28    | 246738 | Dnal (Hsp40) homolog, subfamily C, member 28                         | -1.98 | 0.49 | 0.03 |
| A_51_P468482 | NM_028093 | Entpd8     | 72090  | ectonucleoside triphosphate diphosphohydrolase 8                     | -1.90 | 0.49 | 0.04 |
| A_52_P111963 | NM_175141 | 1810030O07 | 69155  | RIKEN cDNA 1810030O07 gene                                           | -2.38 | 0.49 | 0.01 |
| A_52_P476357 | NM_016878 | Dnpep      | 13437  | aspartyl aminopeptidase                                              | -2.31 | 0.49 | 0.01 |
| A_51_P169635 | NM_178744 | Zbtb1      | 268564 | zinc finger and BTB domain containing 1                              | -2.46 | 0.49 | 0.00 |
| A_51_P519404 | AK021268  | 1110065P2  | 68920  | RIKEN cDNA 1110065P20 gene                                           | -1.65 | 0.49 | 0.11 |
| A_51_P260730 | NM_018804 | Syt11      | 229521 | synaptotagmin XI                                                     | -1.84 | 0.49 | 0.04 |
| A_52_P232637 | NM_007857 | Dhh        | 13363  | desert hedgehog                                                      | -2.00 | 0.49 | 0.02 |
| A_51_P269793 | AK033780  | NA         | NA     | NA                                                                   | -1.97 | 0.49 | 0.03 |
| A_52_P210246 | NM_144855 | Cbs        | 12411  | cystathionine beta-synthase                                          | -2.42 | 0.49 | 0.00 |
| A_51_P381178 | AK038975  | Zbtb46     | 72147  | zinc finger and BTB domain containing 46                             | -2.51 | 0.49 | 0.00 |
| A_51_P432504 | NM_024229 | Pcyt2      | 68671  | phosphate cytidylyltransferase 2, ethanolamine                       | -2.09 | 0.49 | 0.02 |
| A_51_P498831 | NM_033562 | Derl2      | 116891 | Der1-like domain family, member 2                                    | -2.13 | 0.49 | 0.01 |
| A_51_P353946 | NM_010549 | Il11ra1    | 16157  | interleukin 11 receptor, alpha chain 1                               | -1.95 | 0.49 | 0.03 |
| A_52_P634950 | BC004066  | NA         | NA     | NA                                                                   | -1.81 | 0.49 | 0.05 |
| A_51_P304449 | AK031960  | NA         | NA     | NA                                                                   | -2.21 | 0.49 | 0.01 |
| A_52_P668882 | AK153996  | D930015E06 | 229473 | RIKEN cDNA D930015E06 gene                                           | -2.09 | 0.49 | 0.02 |
| A_51_P436957 | NM_025799 | Fuca2      | 66848  | fucosidase, alpha-L- 2, plasma                                       | -1.96 | 0.49 | 0.03 |
| A_52_P27122  | NA        | NA         | NA     | NA                                                                   | -2.16 | 0.49 | 0.01 |
| A_51_P209597 | AK143987  | Afm        | 280662 | afamin                                                               | -2.18 | 0.49 | 0.01 |

|               |           |           |        |                                                                         |       |      |      |
|---------------|-----------|-----------|--------|-------------------------------------------------------------------------|-------|------|------|
| A_51_P389447  | NM_026833 | ORF19     | 68767  | open reading frame 19                                                   | -1.47 | 0.49 | 0.20 |
| A_52_P276529  | NM_175207 | Ankrd9    | 74251  | ankyrin repeat domain 9                                                 | -2.01 | 0.49 | 0.02 |
| A_51_P520917  | NM_011439 | Sox13     | 20668  | SRY-box containing gene 13                                              | -2.41 | 0.49 | 0.00 |
| A_52_P122843  | XM_001001 | BC032203  | 210982 | cDNA sequence BC032203                                                  | -1.93 | 0.49 | 0.03 |
| A_52_P566005  | AK129235  | Taok2     | 381921 | TAO kinase 2                                                            | -2.13 | 0.49 | 0.01 |
| A_52_P488092  | AK147510  | Etl4      | 208618 | enhancer trap locus 4                                                   | -2.12 | 0.49 | 0.01 |
| A_52_P264647  | XM_484000 | Gm6685    | 626571 | cytochrome b5 domain containing 1 pseudogene                            | -2.06 | 0.49 | 0.02 |
| A_51_P394788  | NM_021895 | Actn4     | 60595  | actinin alpha 4                                                         | -2.46 | 0.49 | 0.00 |
| A_51_P265093  | AK144671  | Aasdhppt  | 67618  | aminoadipate-semialdehyde dehydrogenase-phosphopantetheinyl transferase | -2.51 | 0.49 | 0.00 |
| A_51_P299216  | BC043315  | Wdr90     | 106618 | WD repeat domain 90                                                     | -2.29 | 0.49 | 0.01 |
| A_51_P431087  | NM_009242 | Sparc     | 20692  | secreted acidic cysteine rich glycoprotein                              | -1.69 | 0.49 | 0.09 |
| A_52_P1157979 | NM_007590 | Calm3     | 12315  | calmodulin 3                                                            | -2.15 | 0.49 | 0.01 |
| A_51_P121793  | NM_008891 | Pnn       | 18949  | pinin                                                                   | -1.87 | 0.49 | 0.04 |
| A_51_P153973  | NM_198322 | Zfp273    | 212569 | zinc finger protein 273                                                 | -2.33 | 0.49 | 0.01 |
| A_51_P140331  | NM_152808 | Slc44a2   | 68682  | solute carrier family 44, member 2                                      | -2.50 | 0.49 | 0.00 |
| A_51_P153170  | NM_029787 | Cyb5r3    | 109754 | cytochrome b5 reductase 3                                               | -2.75 | 0.49 | 0.00 |
| A_52_P869373  | AK163389  | Smcr7l    | 239555 | Smith-Magenis syndrome chromosome region, candidate 7-like (human)      | -2.35 | 0.49 | 0.01 |
| A_51_P384515  | AK082385  | Ido2      | 209176 | indoleamine 2,3-dioxygenase 2                                           | -2.20 | 0.49 | 0.01 |
| A_51_P152216  | NM_025693 | Tmem41a   | 66664  | transmembrane protein 41a                                               | -1.96 | 0.49 | 0.03 |
| A_51_P464023  | NM_021528 | Chst12    | 59031  | carbohydrate sulfotransferase 12                                        | -2.67 | 0.49 | 0.00 |
| A_52_P609475  | NM_018877 | Setdb1    | 84505  | SET domain, bifurcated 1                                                | -1.63 | 0.49 | 0.12 |
| A_51_P148122  | NM_027910 | Klhdc3    | 71765  | kelch domain containing 3                                               | -2.61 | 0.49 | 0.00 |
| A_52_P172711  | AK080470  | Srr       | 27364  | serine racemase                                                         | -2.54 | 0.49 | 0.00 |
| A_52_P101551  | NM_020517 | Lenep     | 57275  | lens epithelial protein                                                 | -2.37 | 0.49 | 0.01 |
| A_51_P324551  | NM_025785 | Fbxo25    | 66822  | F-box protein 25                                                        | -2.65 | 0.49 | 0.00 |
| A_51_P456466  | NM_021455 | Mlxipl    | 58805  | MLX interacting protein-like                                            | -2.10 | 0.49 | 0.02 |
| A_51_P304397  | BC100404  | Cpm       | 70574  | carboxypeptidase M                                                      | -2.02 | 0.49 | 0.02 |
| A_51_P125567  | NM_144877 | Mettl13   | 71449  | methyltransferase like 13                                               | -2.08 | 0.49 | 0.02 |
| A_52_P194242  | NM_001039 | Sel1l     | 20338  | sel-1 suppressor of lin-12-like (C. elegans)                            | -2.68 | 0.49 | 0.00 |
| A_52_P588580  | NM_001001 | 9830163HC | 414109 | RIKEN cDNA 9830163H01 gene                                              | -1.89 | 0.49 | 0.04 |
| A_51_P478400  | NM_008488 | Arhgef1   | 16801  | Rho guanine nucleotide exchange factor (GEF) 1                          | -2.78 | 0.49 | 0.00 |

|              |           |           |        |                                                           |       |      |      |
|--------------|-----------|-----------|--------|-----------------------------------------------------------|-------|------|------|
| A_52_P195018 | NM_139206 | Arap3     | 106952 | ArfGAP with RhoGAP domain, ankyrin repeat and PH domain 3 | -2.32 | 0.49 | 0.01 |
| A_51_P368557 | NM_138607 | Fam50a    | 108160 | family with sequence similarity 50, member A              | -2.59 | 0.49 | 0.00 |
| A_52_P623751 | NM_010193 | Fem1b     | 14155  | feminization 1 homolog b (C. elegans)                     | -2.18 | 0.49 | 0.01 |
| A_52_P883463 | AK045690  | NA        | NA     | NA                                                        | -1.61 | 0.49 | 0.13 |
| A_52_P201551 | NM_173437 | Nav1      | 215690 | neuron navigator 1                                        | -2.64 | 0.49 | 0.00 |
| A_52_P617080 | NM_025868 | Tmx2      | 66958  | thioredoxin-related transmembrane protein 2               | -2.18 | 0.49 | 0.01 |
| A_51_P261991 | NM_007540 | Bdnf      | 12064  | brain derived neurotrophic factor                         | -2.43 | 0.49 | 0.00 |
| A_52_P425706 | NM_027355 | Rnf168    | 70238  | ring finger protein 168                                   | -2.33 | 0.49 | 0.01 |
| A_52_P348922 | AK017896  | C2cd2     | 207781 | C2 calcium-dependent domain containing 2                  | -2.26 | 0.49 | 0.01 |
| A_51_P361120 | NM_025518 | Dus2l     | 66369  | dihydrouridine synthase 2-like (SMM1, S. cerevisiae)      | -2.28 | 0.49 | 0.01 |
| A_51_P510418 | NM_028270 | Aldh1b1   | 72535  | aldehyde dehydrogenase 1 family, member B1                | -1.64 | 0.49 | 0.11 |
| A_52_P653367 | NA        | NA        | NA     | NA                                                        | -2.34 | 0.49 | 0.01 |
| A_51_P280085 | NM_028298 | Zfp655    | 72611  | zinc finger protein 655                                   | -2.00 | 0.49 | 0.02 |
| A_52_P199554 | NM_153597 | Trpt1     | 107328 | tRNA phosphotransferase 1                                 | -2.07 | 0.49 | 0.02 |
| A_52_P237871 | NM_007970 | Ezh1      | 14055  | enhancer of zeste homolog 1 (Drosophila)                  | -2.50 | 0.49 | 0.00 |
| A_52_P550932 | NM_008197 | H1f0      | 14958  | H1 histone family, member 0                               | -1.70 | 0.49 | 0.09 |
| A_52_P110270 | NM_001045 | Rdbp      | 27632  | RD RNA-binding protein                                    | -2.41 | 0.49 | 0.00 |
| A_51_P393223 | BC022973  | Ankrd23   | 78321  | ankyrin repeat domain 23                                  | -2.09 | 0.49 | 0.02 |
| A_51_P144712 | NM_178930 | Gbf1      | 107338 | golgi-specific brefeldin A-resistance factor 1            | -1.25 | 0.49 | 0.55 |
| A_51_P346641 | XM_905633 | Armcx4    | 102910 | armadillo repeat containing, X-linked 4                   | -1.50 | 0.49 | 0.20 |
| A_52_P16419  | NM_010271 | Gpd1      | 14555  | glycerol-3-phosphate dehydrogenase 1 (soluble)            | -1.95 | 0.49 | 0.03 |
| A_52_P591153 | NM_178911 | Plid4     | 104759 | phospholipase D family, member 4                          | -2.51 | 0.49 | 0.00 |
| A_51_P340174 | NM_172682 | Fam160a1  | 229488 | family with sequence similarity 160, member A1            | -1.61 | 0.49 | 0.13 |
| A_51_P472329 | NM_028883 | 4632415K1 | 74347  | RIKEN cDNA 4632415K11 gene                                | -2.44 | 0.49 | 0.00 |
| A_52_P242251 | NM_145415 | AA408296  | 215193 | expressed sequence AA408296                               | -2.34 | 0.49 | 0.01 |
| A_52_P257919 | XM_283804 | 9830001HC | 320706 | RIKEN cDNA 9830001H06 gene                                | -2.03 | 0.48 | 0.02 |
| A_51_P365980 | NM_175149 | 2310022B0 | 69551  | RIKEN cDNA 2310022B05 gene                                | -1.97 | 0.48 | 0.03 |
| A_52_P203852 | AK009244  | 2310009AC | 66364  | RIKEN cDNA 2310009A05 gene                                | -1.48 | 0.48 | 0.20 |
| A_52_P639567 | NM_013799 | Ate1      | 11907  | arginyltransferase 1                                      | -2.43 | 0.48 | 0.00 |
| A_51_P350996 | NM_080461 | Zfp358    | 140482 | zinc finger protein 358                                   | -2.36 | 0.48 | 0.01 |
| A_52_P290434 | AK051849  | Fbxl7     | 448987 | F-box and leucine-rich repeat protein 7                   | -2.75 | 0.48 | 0.00 |
| A_52_P670255 | NM_008379 | Kpnb1     | 16211  | karyopherin (importin) beta 1                             | -1.77 | 0.48 | 0.07 |

|              |           |          |        |                                                                                                  |       |      |      |
|--------------|-----------|----------|--------|--------------------------------------------------------------------------------------------------|-------|------|------|
| A_51_P446856 | AK050046  | Flnb     | 286940 | filamin, beta                                                                                    | -2.42 | 0.48 | 0.00 |
| A_52_P1333   | BC065093  | Ankrd27  | 245886 | ankyrin repeat domain 27 (VPS9 domain)                                                           | -2.46 | 0.48 | 0.00 |
| A_51_P452682 | AK076753  | Pou5f2   | 75507  | POU domain class 5, transcription factor 2                                                       | -2.08 | 0.48 | 0.02 |
| A_52_P218379 | XM_138275 | NA       | NA     | NA                                                                                               | -2.34 | 0.48 | 0.01 |
| A_51_P174407 | NM_153513 | BC028528 | 229600 | cDNA sequence BC028528                                                                           | -2.32 | 0.48 | 0.01 |
| A_51_P200561 | NM_175172 | 4930506M | 71653  | RIKEN cDNA 4930506M07 gene                                                                       | -2.14 | 0.48 | 0.01 |
| A_51_P136355 | NM_025331 | Gng11    | 66066  | guanine nucleotide binding protein (G protein), gamma 11                                         | -1.89 | 0.48 | 0.04 |
| A_51_P238533 | AK020301  | Col4a3bp | 68018  | collagen, type IV, alpha 3 (Goodpasture antigen) binding protein                                 | -2.04 | 0.48 | 0.02 |
| A_51_P114049 | NM_134142 | Tmem109  | 68539  | transmembrane protein 109                                                                        | -2.31 | 0.48 | 0.01 |
| A_51_P478326 | NM_026270 | Akt1s1   | 67605  | AKT1 substrate 1 (proline-rich)                                                                  | -2.85 | 0.48 | 0.00 |
| A_52_P395064 | NM_033072 | Mbd6     | 110962 | methyl-CpG binding domain protein 6                                                              | -2.14 | 0.48 | 0.01 |
| A_51_P176912 | NM_139145 | Hlcs     | 110948 | holocarboxylase synthetase (biotin- [propionyl-Coenzyme A-carboxylase (ATP-hydrolysing)] ligase) | -2.13 | 0.48 | 0.01 |
| A_52_P241519 | NM_008659 | Myo1c    | 17913  | myosin IC                                                                                        | -2.31 | 0.48 | 0.01 |
| A_51_P341571 | NM_027117 | Klhdc2   | 69554  | kelch domain containing 2                                                                        | -2.26 | 0.48 | 0.01 |
| A_51_P382121 | NM_145517 | Ormdl1   | 227102 | ORM1-like 1 ( <i>S. cerevisiae</i> )                                                             | -2.29 | 0.48 | 0.01 |
| A_51_P358152 | NM_029100 | Sepn1    | 74777  | selenoprotein N, 1                                                                               | -2.24 | 0.48 | 0.01 |
| A_51_P269634 | NM_011748 | Zfp14    | 243906 | zinc finger protein 14                                                                           | -1.65 | 0.48 | 0.11 |
| A_51_P416419 | NM_007591 | Calr     | 12317  | calreticulin                                                                                     | -1.93 | 0.48 | 0.03 |
| A_51_P134533 | NM_026416 | S100a16  | 67860  | S100 calcium binding protein A16                                                                 | -2.57 | 0.48 | 0.00 |
| A_51_P335969 | NM_010043 | Des      | 13346  | desmin                                                                                           | -1.69 | 0.48 | 0.09 |
| A_52_P145482 | NM_146061 | Prr5     | 109270 | proline rich 5 (renal)                                                                           | -2.19 | 0.48 | 0.01 |
| A_52_P587924 | NM_009274 | Srpk2    | 20817  | serine/arginine-rich protein specific kinase 2                                                   | -1.95 | 0.48 | 0.03 |
| A_52_P404363 | NM_183016 | Cdc42bpb | 217866 | CDC42 binding protein kinase beta                                                                | -2.33 | 0.48 | 0.01 |
| A_51_P122035 | NM_153578 | Nipa1    | 233280 | non imprinted in Prader-Willi/Angelman syndrome 1 homolog (human)                                | -1.91 | 0.48 | 0.04 |
| A_52_P284348 | NA        | NA       | NA     | NA                                                                                               | -2.47 | 0.48 | 0.00 |
| A_51_P114136 | NM_177294 | Rpap1    | 68925  | RNA polymerase II associated protein 1                                                           | -2.54 | 0.48 | 0.00 |
| A_52_P364776 | NM_008563 | Mcm3     | 17215  | minichromosome maintenance deficient 3 ( <i>S. cerevisiae</i> )                                  | -2.24 | 0.48 | 0.01 |
| A_51_P367220 | NM_009012 | Rad50    | 19360  | RAD50 homolog ( <i>S. cerevisiae</i> )                                                           | -1.96 | 0.48 | 0.03 |

|              |           |           |        |                                                                              |       |      |      |
|--------------|-----------|-----------|--------|------------------------------------------------------------------------------|-------|------|------|
| A_51_P512172 | AK010953  | Tet1      | 52463  | tet oncogene 1                                                               | -2.37 | 0.48 | 0.01 |
| A_51_P179647 | NA        | NA        | NA     | NA                                                                           | -2.20 | 0.48 | 0.01 |
| A_51_P170562 | BC025836  | Cpn2      | 71756  | carboxypeptidase N, polypeptide 2                                            | -1.89 | 0.48 | 0.04 |
| A_51_P429682 | NM_007898 | Ebp       | 13595  | phenylalkylamine Ca2+ antagonist (emopamil) binding protein                  | -1.89 | 0.48 | 0.04 |
| A_52_P149391 | NM_001033 | Usp40     | 227334 | ubiquitin specific peptidase 40                                              | -2.19 | 0.48 | 0.01 |
| A_52_P204393 | AK043908  | Dedd2     | 67379  | death effector domain-containing DNA binding protein 2                       | -2.41 | 0.48 | 0.00 |
| A_52_P624168 | NM_027435 | Atad2     | 70472  | ATPase family, AAA domain containing 2                                       | -2.67 | 0.48 | 0.00 |
| A_52_P802961 | AK149452  | Hsd3b3    | 15494  | hydroxy-delta-5-steroid dehydrogenase, 3 beta- and steroid delta-isomerase 3 | -1.22 | 0.48 | 0.58 |
| A_52_P94495  | AK050059  | Prkd3     | 75292  | protein kinase D3                                                            | -1.58 | 0.48 | 0.15 |
| A_51_P513941 | NM_013587 | Lrpap1    | 16976  | low density lipoprotein receptor-related protein associated protein 1        | -2.58 | 0.48 | 0.00 |
| A_51_P211315 | NM_153545 | Lrrc45    | 217366 | leucine rich repeat containing 45                                            | -2.10 | 0.48 | 0.01 |
| A_51_P168632 | NM_008921 | Prim1     | 19075  | DNA primase, p49 subunit                                                     | -1.97 | 0.48 | 0.03 |
| A_51_P460633 | NM_008244 | Hgs       | 15239  | HGF-regulated tyrosine kinase substrate                                      | -2.44 | 0.48 | 0.00 |
| A_51_P267671 | NM_030251 | Abtb1     | 80283  | ankyrin repeat and BTB (POZ) domain containing 1                             | -2.53 | 0.48 | 0.00 |
| A_51_P433615 | NM_183390 | Klhl6     | 239743 | kelch-like 6 (Drosophila)                                                    | -2.34 | 0.48 | 0.01 |
| A_51_P259571 | NM_145154 | Angptl6   | 70726  | angiopoietin-like 6                                                          | -1.93 | 0.48 | 0.03 |
| A_52_P142154 | NM_024229 | Pcyt2     | 68671  | phosphate cytidylyltransferase 2, ethanolamine                               | -2.77 | 0.48 | 0.00 |
| A_51_P439645 | NM_029296 | 1700001C1 | 75462  | RIKEN cDNA 1700001C19 gene                                                   | -1.59 | 0.48 | 0.14 |
| A_52_P185014 | NM_145152 | Lrrc3     | 237387 | leucine rich repeat containing 3                                             | -2.39 | 0.48 | 0.01 |
| A_51_P269153 | NM_133968 | Snapc2    | 102209 | small nuclear RNA activating complex, polypeptide 2                          | -2.52 | 0.48 | 0.00 |
| A_52_P589509 | AK048755  | Scaper    | 244891 | S phase cyclin A-associated protein in the ER                                | -2.31 | 0.48 | 0.01 |
| A_51_P490924 | NM_177900 | Hapln4    | 330790 | hyaluronan and proteoglycan link protein 4                                   | -1.91 | 0.48 | 0.04 |
| A_51_P152479 | BC067070  | 4932415G1 | 67723  | RIKEN cDNA 4932415G12 gene                                                   | -1.54 | 0.48 | 0.16 |
| A_52_P244763 | AK078393  | Trip4     | 56404  | thyroid hormone receptor interactor 4                                        | -2.15 | 0.48 | 0.01 |
| A_51_P221801 | NM_010163 | Ext2      | 14043  | exostoses (multiple) 2                                                       | -2.86 | 0.48 | 0.00 |
| A_51_P247034 | NM_133694 | Fbxl15    | 68431  | F-box and leucine-rich repeat protein 15                                     | -2.92 | 0.48 | 0.00 |
| A_52_P334670 | NM_007715 | Clock     | 12753  | circadian locomoter output cycles kaput                                      | -2.21 | 0.48 | 0.01 |
| A_52_P551496 | NM_026756 | Nfic      | 18029  | nuclear factor I/C                                                           | -1.51 | 0.48 | 0.18 |

|              |           |           |        |                                                                                              |       |      |      |
|--------------|-----------|-----------|--------|----------------------------------------------------------------------------------------------|-------|------|------|
| A_52_P503597 | NM_177771 | Klhl18    | 270201 | kelch-like 18 (Drosophila)                                                                   | -2.50 | 0.48 | 0.00 |
| A_52_P330201 | NM_025504 | Atp5sl    | 66349  | ATP5S-like                                                                                   | -1.86 | 0.48 | 0.04 |
| A_51_P429567 | NM_053106 | Lmod1     | 93689  | leiomodrin 1 (smooth muscle)                                                                 | -1.14 | 0.48 | 0.82 |
| A_51_P210634 | NM_023547 | Ino80b    | 70020  | INO80 complex subunit B                                                                      | -1.92 | 0.48 | 0.03 |
| A_51_P488718 | NM_026846 | Zfand2b   | 68818  | zinc finger, AN1 type domain 2B                                                              | -3.02 | 0.48 | 0.00 |
| A_52_P118461 | NM_027184 | Ipmk      | 69718  | inositol polyphosphate multikinase                                                           | -2.20 | 0.48 | 0.01 |
| A_51_P277767 | NM_024199 | Cstf1     | 67337  | cleavage stimulation factor, 3' pre-RNA, subunit 1                                           | -2.58 | 0.48 | 0.00 |
| A_51_P504863 | NM_008795 | Cdk18     | 18557  | cyclin-dependent kinase 18                                                                   | -2.02 | 0.48 | 0.02 |
| A_51_P390446 | AK122326  | Pacs2     | 217893 | phosphofurin acidic cluster sorting protein 2                                                | -2.12 | 0.48 | 0.01 |
| A_51_P450740 | NM_011877 | Ptpn21    | 24000  | protein tyrosine phosphatase, non-receptor type 21                                           | -2.04 | 0.48 | 0.02 |
| A_51_P278214 | NM_023685 | Zkscan3   | 72739  | zinc finger with KRAB and SCAN domains 3                                                     | -2.29 | 0.48 | 0.01 |
| A_51_P384754 | NM_010697 | Ldb1      | 16825  | LIM domain binding 1                                                                         | -2.68 | 0.48 | 0.00 |
| A_51_P460958 | NM_028120 | Ccdc123   | 72140  | coiled-coil domain containing 123                                                            | -2.59 | 0.48 | 0.00 |
| A_51_P105709 | NM_027182 | Trip13    | 69716  | thyroid hormone receptor interactor 13                                                       | -2.41 | 0.48 | 0.00 |
| A_51_P498403 | NM_028065 | Cnpy3     | 72029  | canopy 3 homolog (zebrafish)                                                                 | -2.48 | 0.48 | 0.00 |
| A_52_P120740 | BC066053  | 0610030E2 | 68364  | RIKEN cDNA 0610030E20 gene<br>calcium/calmodulin-dependent protein kinase II                 | -2.02 | 0.48 | 0.02 |
| A_52_P64687  | NM_025451 | Camk2n1   | 66259  | inhibitor 1                                                                                  | -2.17 | 0.48 | 0.01 |
| A_51_P221460 | NM_025661 | Ormdl3    | 66612  | ORM1-like 3 ( <i>S. cerevisiae</i> )                                                         | -1.76 | 0.48 | 0.07 |
| A_52_P546421 | NM_013839 | Nr1h3     | 22259  | nuclear receptor subfamily 1, group H, member 3                                              | -2.36 | 0.48 | 0.01 |
| A_52_P601333 | AK078961  | 6230424C1 | 67786  | RIKEN cDNA 6230424C14 gene                                                                   | -2.60 | 0.48 | 0.00 |
| A_52_P20391  | CB182661  | NA        | NA     | NA                                                                                           | -2.26 | 0.48 | 0.01 |
| A_51_P403234 | NM_019572 | Hdac7     | 56233  | histone deacetylase 7                                                                        | -2.66 | 0.48 | 0.00 |
| A_52_P234958 | NM_010091 | Dvl1      | 13542  | dishevelled, dsh homolog 1 (Drosophila)                                                      | -2.55 | 0.48 | 0.00 |
| A_51_P176769 | XM_355812 | Lpar5     | 381810 | lysophosphatidic acid receptor 5<br>solute carrier family 39 (metal ion transporter), member | -1.61 | 0.48 | 0.13 |
| A_51_P295701 | NM_026721 | Slc39a13  | 68427  | 13                                                                                           | -2.49 | 0.48 | 0.00 |
| A_52_P333610 | AK143711  | Solh      | 50817  | small optic lobes homolog (Drosophila)                                                       | -2.45 | 0.48 | 0.00 |
| A_51_P468362 | BC043115  | Ccdc88c   | 68339  | coiled-coil domain containing 88C                                                            | -1.70 | 0.48 | 0.09 |
| A_51_P412109 | AK011661  | Zfp318    | 57908  | zinc finger protein 318                                                                      | -2.12 | 0.48 | 0.01 |
| A_51_P410949 | BC066818  | Polr3g    | 67486  | polymerase (RNA) III (DNA directed) polypeptide G                                            | -2.19 | 0.48 | 0.01 |
| A_51_P147274 | NM_153197 | Clec4a3   | 73149  | C-type lectin domain family 4, member a3                                                     | -2.38 | 0.48 | 0.01 |

|              |           |           |         |                                                                                  |       |      |      |
|--------------|-----------|-----------|---------|----------------------------------------------------------------------------------|-------|------|------|
| A_52_P555680 | NM_178811 | Ttc15     | 217449  | tetratricopeptide repeat domain 15                                               | -2.34 | 0.48 | 0.01 |
| A_51_P176054 | NM_178641 | Inpp5f    | 101490  | inositol polyphosphate-5-phosphatase F                                           | -2.45 | 0.48 | 0.00 |
| A_51_P118885 | NM_008537 | Amacr     | 17117   | alpha-methylacyl-CoA racemase                                                    | -1.91 | 0.48 | 0.04 |
| A_51_P314855 | NM_001030 | Mcat      | 223722  | malonyl CoA:ACP acyltransferase (mitochondrial)                                  | -2.48 | 0.48 | 0.00 |
| A_51_P300655 | BC082558  | Tbccd1    | 70573   | TBCC domain containing 1                                                         | -2.36 | 0.48 | 0.01 |
| A_52_P145433 | AK035508  | D7Ertd715 | 52480   | DNA segment, Chr 7, ERATO Doi 715, expressed                                     | -1.51 | 0.48 | 0.20 |
| A_52_P122673 | NM_031998 | Tsga14    | 83922   | testis specific gene A14                                                         | -2.43 | 0.48 | 0.00 |
| A_51_P186564 | NM_172596 | Sec24c    | 218811  | Sec24 related gene family, member C (S. cerevisiae)                              | -2.46 | 0.48 | 0.00 |
| A_51_P227165 | NM_025865 | 2310030G  | 66952   | RIKEN cDNA 2310030G06 gene                                                       | -1.87 | 0.48 | 0.04 |
| A_52_P238523 | NM_183147 | Sprn      | 212518  | shadow of prion protein<br>nudix (nucleoside diphosphate linked moiety X)-type   | -2.30 | 0.48 | 0.01 |
| A_52_P625061 | NM_029385 | Nudt16    | 75686   | motif 16                                                                         | -2.21 | 0.48 | 0.01 |
| A_52_P553408 | AK051620  | D130060J1 | 319595  | RIKEN cDNA D130060J10 gene                                                       | -2.10 | 0.48 | 0.02 |
| A_51_P262721 | NA        | NA        | NA      | NA                                                                               | -2.35 | 0.48 | 0.01 |
| A_52_P129114 | NM_207223 | Acap3     | 140500  | ArfGAP with coiled-coil, ankyrin repeat and PH domains<br>3                      | -2.47 | 0.48 | 0.00 |
| A_52_P185109 | NM_027266 | Rg9mtd3   | 69934   | RNA (guanine-9-) methyltransferase domain containing<br>3                        | -2.44 | 0.48 | 0.00 |
| A_52_P121035 | NM_028049 | Fbxo22    | 71999   | F-box protein 22                                                                 | -2.07 | 0.48 | 0.02 |
| A_52_P161417 | AK050217  | C730027H1 | 1319572 | RIKEN cDNA C730027H18 gene                                                       | -2.05 | 0.48 | 0.02 |
| A_52_P668715 | NM_026532 | Nutf2     | 68051   | nuclear transport factor 2                                                       | -2.57 | 0.48 | 0.00 |
| A_51_P457775 | U53586    | Evi5      | 14020   | ecotropic viral integration site 5                                               | -1.33 | 0.48 | 0.40 |
| A_52_P452540 | NM_021896 | Gucy1a3   | 60596   | guanylate cyclase 1, soluble, alpha 3                                            | -2.45 | 0.48 | 0.00 |
| A_52_P247185 | AK031598  | Masp1     | 17174   | mannan-binding lectin serine peptidase 1                                         | -2.49 | 0.48 | 0.00 |
| A_51_P133737 | NM_026313 | Luc7l3    | 67684   | LUC7-like 3 (S. cerevisiae)<br>dysbindin (dystrobrevin binding protein 1) domain | -2.24 | 0.48 | 0.01 |
| A_51_P133381 | NM_026797 | Dbnnd2    | 52840   | containing 2                                                                     | -2.71 | 0.48 | 0.00 |
| A_51_P222815 | NM_172617 | Zfp523    | 224656  | zinc finger protein 523                                                          | -2.79 | 0.48 | 0.00 |
| A_52_P22781  | AK133399  | D330038O  | 330788  | RIKEN cDNA D330038O06 gene                                                       | -2.43 | 0.48 | 0.00 |
| A_52_P30550  | NM_007387 | Acp2      | 11432   | acid phosphatase 2, lysosomal                                                    | -2.08 | 0.48 | 0.02 |
| A_52_P589664 | NM_172919 | Zfp846    | 244721  | zinc finger protein 846                                                          | -2.08 | 0.48 | 0.02 |
| A_51_P303180 | NM_026667 | Fam114a1  | 68303   | family with sequence similarity 114, member A1                                   | -2.35 | 0.48 | 0.01 |
| A_52_P281924 | NM_016872 | Vamp5     | 53620   | vesicle-associated membrane protein 5                                            | -2.30 | 0.48 | 0.01 |



|              |            |                |        |                                                                                             |       |      |      |
|--------------|------------|----------------|--------|---------------------------------------------------------------------------------------------|-------|------|------|
| A_51_P258409 | NM_010423  | Hey1           | 15213  | hairy/enhancer-of-split related with YRPW motif 1                                           | -2.25 | 0.48 | 0.01 |
| A_51_P469411 | NM_011632  | Traf3          | 22031  | TNF receptor-associated factor 3                                                            | -2.56 | 0.48 | 0.00 |
| A_52_P454703 | BC033430   | LOC1002701E+08 |        | hypothetical LOC100270747                                                                   | -1.55 | 0.48 | 0.16 |
| A_52_P512329 | NM_027248  | Zfp219         | 69890  | zinc finger protein 219                                                                     | -2.27 | 0.48 | 0.01 |
| A_51_P424054 | XM_0010007 | Btbd2          | 208198 | BTB (POZ) domain containing 2                                                               | -2.36 | 0.48 | 0.01 |
| A_52_P546660 | NM_183112  | 170002911      | 75641  | RIKEN cDNA 1700029115 gene                                                                  | -2.61 | 0.48 | 0.00 |
| A_52_P80593  | BC034004   | Pole3          | 59001  | polymerase (DNA directed), epsilon 3 (p17 subunit)                                          | -2.12 | 0.48 | 0.01 |
| A_52_P40704  | AK032704   | Sap130         | 269003 | Sin3A associated protein                                                                    | -1.80 | 0.48 | 0.05 |
| A_51_P101283 | NA         | NA             | NA     | NA                                                                                          | -1.44 | 0.47 | 0.24 |
| A_52_P112178 | XM_0010008 | NA             | NA     | NA                                                                                          | -2.20 | 0.47 | 0.01 |
| A_52_P666257 | NM_011069  | Pex11b         | 18632  | peroxisomal biogenesis factor 11 beta                                                       | -2.09 | 0.47 | 0.02 |
| A_51_P477179 | NM_022433  | Sirt3          | 64384  | sirtuin 3 (silent mating type information regulation 2, homolog) 3 ( <i>S. cerevisiae</i> ) | -2.65 | 0.47 | 0.00 |
| A_51_P363801 | NM_023217  | Pgpep1         | 66522  | pyroglutamyl-peptidase I                                                                    | -2.04 | 0.47 | 0.02 |
| A_51_P480328 | NM_133222  | Eld1           | 170757 | EGF, latrophilin seven transmembrane domain containing 1                                    | -2.34 | 0.47 | 0.01 |
| A_51_P111595 | NM_172516  | Dstyk          | 213452 | dual serine/threonine and tyrosine protein kinase                                           | -2.64 | 0.47 | 0.00 |
| A_51_P453206 | NM_008853  | Pja1           | 18744  | praja1, RING-H2 motif containing                                                            | -2.75 | 0.47 | 0.00 |
| A_52_P678056 | NM_172145  | Fam176b        | 230752 | family with sequence similarity 176, member B                                               | -2.59 | 0.47 | 0.00 |
| A_51_P479408 | NM_008317  | Hyal1          | 15586  | hyaluronoglucosaminidase 1                                                                  | -1.61 | 0.47 | 0.13 |
| A_52_P54856  | BC064081   | Fam100a        | 207740 | family with sequence similarity 100, member A                                               | -2.40 | 0.47 | 0.00 |
| A_51_P290601 | NM_013859  | Znhit2         | 29805  | zinc finger, HIT domain containing 2                                                        | -2.69 | 0.47 | 0.00 |
| A_51_P119401 | BC057363   | Tug1           | 544752 | taurine upregulated gene 1                                                                  | -1.49 | 0.47 | 0.20 |
| A_52_P835473 | AK052259   | NA             | NA     | NA                                                                                          | -1.85 | 0.47 | 0.04 |
| A_51_P407683 | NM_145540  | Ints3          | 229543 | integrator complex subunit 3                                                                | -2.03 | 0.47 | 0.02 |
| A_51_P170178 | NM_146184  | B3gnt8         | 232984 | UDP-GlcNAc:betaGal beta-1,3-N-acetylglucosaminyltransferase 8                               | -1.40 | 0.47 | 0.28 |
| A_51_P104897 | NM_080553  | Itpr3          | 16440  | inositol 1,4,5-triphosphate receptor 3                                                      | -1.41 | 0.47 | 0.28 |
| A_51_P155747 | NM_028776  | Scyl3          | 240880 | SCY1-like 3 ( <i>S. cerevisiae</i> )                                                        | -2.61 | 0.47 | 0.00 |
| A_51_P148314 | NM_172543  | Fam117a        | 215512 | family with sequence similarity 117, member A                                               | -1.67 | 0.47 | 0.10 |
| A_52_P601021 | NM_026979  | C1qtnf2        | 69183  | C1q and tumor necrosis factor related protein 2                                             | -2.80 | 0.47 | 0.00 |

|              |           |          |        |                                                                                            |       |      |      |
|--------------|-----------|----------|--------|--------------------------------------------------------------------------------------------|-------|------|------|
| A_51_P340921 | NM_207239 | Gtf3c1   | 233863 | general transcription factor III C 1                                                       | -2.49 | 0.47 | 0.00 |
| A_51_P188666 | NM_020619 | Mogs     | 57377  | mannosyl-oligosaccharide glucosidase                                                       | -2.87 | 0.47 | 0.00 |
| A_51_P284233 | NM_022999 | Prrg2    | 65116  | proline-rich Gla (G-carboxyglutamic acid) polypeptide 2                                    | -2.71 | 0.47 | 0.00 |
| A_51_P205545 | NM_133930 | Crelid1  | 171508 | cysteine-rich with EGF-like domains 1                                                      | -2.25 | 0.47 | 0.01 |
| A_51_P199008 | AK012570  | Zfp108   | 54678  | zinc finger protein 108                                                                    | -2.34 | 0.47 | 0.01 |
| A_51_P424558 | NM_009567 | Zfp93    | 22755  | zinc finger protein 93                                                                     | -2.47 | 0.47 | 0.00 |
| A_52_P159110 | AK043258  | Zfp276   | 57247  | zinc finger protein (C2H2 type) 276                                                        | -1.65 | 0.47 | 0.11 |
| A_51_P327141 | NM_009539 | Zap70    | 22637  | zeta-chain (TCR) associated protein kinase                                                 | -2.28 | 0.47 | 0.01 |
| A_52_P519689 | NM_011306 | Rxrb     | 20182  | retinoid X receptor beta                                                                   | -2.67 | 0.47 | 0.00 |
| A_51_P136792 | NM_026192 | Calcoco1 | 67488  | calcium binding and coiled coil domain 1                                                   | -2.14 | 0.47 | 0.01 |
| A_51_P291839 | NM_183256 | 2310016M | 66379  | RIKEN cDNA 2310016M24 gene                                                                 | -1.73 | 0.47 | 0.07 |
| A_52_P521042 | NM_153557 | BC029214 | 227622 | cDNA sequence BC029214                                                                     | -2.39 | 0.47 | 0.01 |
| A_51_P229633 | NM_027434 | Rprd1b   | 70470  | regulation of nuclear pre-mRNA domain containing 1B                                        | -1.55 | 0.47 | 0.16 |
| A_51_P284318 | NM_054082 | Mta3     | 116871 | metastasis associated 3                                                                    | -2.37 | 0.47 | 0.01 |
| A_52_P127643 | NA        | NA       | NA     | NA                                                                                         | -2.64 | 0.47 | 0.00 |
| A_51_P181152 | NM_133931 | Pot1a    | 101185 | protection of telomeres 1A                                                                 | -2.05 | 0.47 | 0.02 |
| A_52_P477919 | NM_138748 | Ppp2r4   | 110854 | protein phosphatase 2A, regulatory subunit B (PR 53)                                       | -2.61 | 0.47 | 0.00 |
| A_52_P571371 | NM_027495 | Tmem144  | 70652  | transmembrane protein 144                                                                  | -2.27 | 0.47 | 0.01 |
| A_51_P111562 | NM_177620 | Rin3     | 217835 | Ras and Rab interactor 3                                                                   | -2.88 | 0.47 | 0.00 |
| A_51_P460954 | NM_009139 | Ccl6     | 20305  | chemokine (C-C motif) ligand 6                                                             | -2.20 | 0.47 | 0.01 |
| A_52_P234039 | XM_893176 | NA       | NA     | NA                                                                                         | -2.15 | 0.47 | 0.01 |
| A_51_P427619 | AK145503  | Tbx20    | 57246  | T-box 20                                                                                   | -1.37 | 0.47 | 0.33 |
| A_51_P342050 | NM_010153 | ErbB3    | 13867  | v-erb-b2 erythroblastic leukemia viral oncogene homolog 3 (avian)                          | -2.23 | 0.47 | 0.01 |
| A_52_P193362 | NM_021430 | Rilpl1   | 75695  | Rab interacting lysosomal protein-like 1                                                   | -2.51 | 0.47 | 0.00 |
| A_52_P144285 | NM_175382 | Fam72a   | 108900 | family with sequence similarity 72, member A                                               | -2.39 | 0.47 | 0.01 |
| A_51_P382214 | NM_008998 | Rab17    | 19329  | RAB17, member RAS oncogene family                                                          | -1.94 | 0.47 | 0.03 |
| A_51_P128834 | NM_177789 | Vsig4    | 278180 | V-set and immunoglobulin domain containing 4 translocase of inner mitochondrial membrane 9 | -1.92 | 0.47 | 0.04 |
| A_51_P421804 | NM_013896 | Timm9    | 30056  | homolog (yeast)                                                                            | -2.36 | 0.47 | 0.01 |
| A_51_P249537 | NM_173741 | Wdr24    | 268933 | WD repeat domain 24                                                                        | -2.60 | 0.47 | 0.00 |

|              |           |            |        |                                                                                                               |       |      |      |
|--------------|-----------|------------|--------|---------------------------------------------------------------------------------------------------------------|-------|------|------|
| A_52_P628067 | NM_013538 | Cdca3      | 14793  | cell division cycle associated 3                                                                              | -1.47 | 0.47 | 0.21 |
| A_52_P322181 | CK020710  | Adrb1      | 11554  | adrenergic receptor, beta 1                                                                                   | -2.84 | 0.47 | 0.00 |
| A_51_P114456 | AK018110  | 2210012G02 | 66526  | RIKEN cDNA 2210012G02 gene                                                                                    | -2.61 | 0.47 | 0.00 |
| A_51_P487813 | NM_016753 | Lxn        | 17035  | latexin                                                                                                       | -2.27 | 0.47 | 0.01 |
| A_52_P576208 | XM_988947 | A930018M24 | 328399 | RIKEN cDNA A930018M24 gene                                                                                    | -2.61 | 0.47 | 0.00 |
| A_51_P259774 | NM_020258 | Slc37a2    | 56857  | solute carrier family 37 (glycerol-3-phosphate transporter), member 2                                         | -2.77 | 0.47 | 0.00 |
| A_52_P319438 | NM_001039 | Ankrd37    | 654824 | ankyrin repeat domain 37                                                                                      | -2.05 | 0.47 | 0.02 |
| A_51_P461319 | NM_025961 | Gatm       | 67092  | glycine amidinotransferase (L-arginine:glycine amidinotransferase)                                            | -2.36 | 0.47 | 0.01 |
| A_51_P288549 | BC016255  | Jmjd7      | 433466 | jumonji domain containing 7                                                                                   | -2.17 | 0.47 | 0.01 |
| A_51_P427080 | NM_001004 | Asap2      | 211914 | ArfGAP with SH3 domain, ankyrin repeat and PH domain 2                                                        | -1.80 | 0.47 | 0.05 |
| A_51_P205564 | NM_025613 | Eid1       | 58521  | EP300 interacting inhibitor of differentiation 1                                                              | -2.29 | 0.47 | 0.01 |
| A_52_P646312 | NM_144920 | Plekha5    | 109135 | pleckstrin homology domain containing, family A member 5                                                      | -1.60 | 0.47 | 0.13 |
| A_52_P674196 | NM_181316 | Bbs9       | 319845 | Bardet-Biedl syndrome 9 (human)                                                                               | -2.09 | 0.47 | 0.02 |
| A_51_P305731 | NM_138303 | Yipf2      | 74766  | Yip1 domain family, member 2                                                                                  | -2.13 | 0.47 | 0.01 |
| A_51_P155755 | AK077214  | Plid6      | 194908 | phospholipase D family, member 6                                                                              | -2.19 | 0.47 | 0.01 |
| A_52_P335064 | NM_181390 | Mustn1     | 66175  | musculoskeletal, embryonic nuclear protein 1                                                                  | -2.14 | 0.47 | 0.01 |
| A_51_P251433 | NM_023831 | 1500035H01 | 76568  | RIKEN cDNA 1500035H01 gene                                                                                    | -2.40 | 0.47 | 0.01 |
| A_52_P40975  | AK046528  | Fam13a     | 58909  | family with sequence similarity 13, member A                                                                  | -2.03 | 0.47 | 0.02 |
| A_51_P499864 | NM_134024 | Tubg1      | 103733 | tubulin, gamma 1                                                                                              | -2.05 | 0.47 | 0.02 |
| A_52_P257547 | NM_024179 | 0610009O20 | 66839  | RIKEN cDNA 0610009O20 gene                                                                                    | -2.54 | 0.47 | 0.00 |
| A_51_P319022 | NM_009910 | Cxcr3      | 12766  | chemokine (C-X-C motif) receptor 3                                                                            | -2.55 | 0.47 | 0.00 |
| A_52_P356245 | NM_198616 | Ccdc85b    | 240514 | coiled-coil domain containing 85B                                                                             | -1.95 | 0.47 | 0.03 |
| A_52_P633269 | NM_198005 | Dcaf17     | 75763  | DDB1 and CUL4 associated factor 17                                                                            | -1.92 | 0.47 | 0.03 |
| A_52_P166755 | AK171353  | Taok3      | 330177 | TAO kinase 3                                                                                                  | -1.86 | 0.47 | 0.04 |
| A_52_P476560 | NM_145853 | Tpcn1      | 252972 | two pore channel 1                                                                                            | -2.51 | 0.47 | 0.00 |
| A_52_P128968 | NM_029342 | Nhej1      | 75570  | nonhomologous end-joining factor 1                                                                            | -2.48 | 0.47 | 0.00 |
| A_52_P52816  | NM_153515 | Ammecr1    | 225339 | AMME chromosomal region gene 1-like                                                                           | -2.13 | 0.47 | 0.01 |
| A_51_P284997 | NM_016973 | St6galnac6 | 50935  | ST6 (alpha-N-acetyl-neuraminyl-2,3-beta-galactosyl-1,3)-N-acetylgalactosaminide alpha-2,6-sialyltransferase 6 | -2.56 | 0.47 | 0.00 |

|              |           |           |        |                                                                                         |       |      |      |
|--------------|-----------|-----------|--------|-----------------------------------------------------------------------------------------|-------|------|------|
| A_52_P321325 | AK161741  | Zhx3      | 320799 | zinc fingers and homeoboxes 3                                                           | -2.23 | 0.47 | 0.01 |
| A_51_P292116 | NM_010492 | Ica1      | 15893  | islet cell autoantigen 1                                                                | -2.15 | 0.47 | 0.01 |
| A_51_P280200 | NM_009462 | Usp10     | 22224  | ubiquitin specific peptidase 10                                                         | -2.33 | 0.47 | 0.01 |
| A_51_P176505 | NM_175109 | Rps19bp1  | 66538  | ribosomal protein S19 binding protein 1                                                 | -2.22 | 0.47 | 0.01 |
| A_51_P354272 | AK154925  | 130000110 | 74148  | RIKEN cDNA 1300001101 gene                                                              | -2.72 | 0.47 | 0.00 |
| A_52_P420734 | BC051474  | Rasgrp2   | 19395  | RAS, guanyl releasing protein 2                                                         | -2.35 | 0.47 | 0.01 |
| A_51_P243623 | NM_001037 | Brms1l    | 52592  | breast cancer metastasis-suppressor 1-like                                              | -1.89 | 0.47 | 0.04 |
| A_52_P353445 | NM_028950 | Nsun6     | 74455  | NOL1/NOP2/Sun domain family member 6                                                    | -2.68 | 0.47 | 0.00 |
| A_52_P40212  | XM_898905 | Tomm5     | 68512  | translocase of outer mitochondrial membrane 5 homolog (yeast)                           | -1.84 | 0.47 | 0.04 |
| A_52_P448466 | NM_030561 | BC004004  | 80748  | cDNA sequence BC004004                                                                  | -2.45 | 0.47 | 0.00 |
| A_51_P308347 | NM_172826 | Dact2     | 240025 | dapper homolog 2, antagonist of beta-catenin (xenopus)                                  | -2.70 | 0.47 | 0.00 |
| A_51_P488039 | NM_011494 | Stk16     | 20872  | serine/threonine kinase 16                                                              | -2.51 | 0.47 | 0.00 |
| A_51_P410286 | NM_172132 | Kdm4b     | 193796 | lysine (K)-specific demethylase 4B                                                      | -2.63 | 0.47 | 0.00 |
| A_51_P277718 | NM_007683 | Cenpc1    | 12617  | centromere protein C1                                                                   | -2.44 | 0.47 | 0.00 |
| A_51_P359122 | XM_973716 | NA        | NA     | NA                                                                                      | -1.94 | 0.47 | 0.03 |
| A_52_P167735 | NA        | NA        | NA     | NA                                                                                      | -2.38 | 0.47 | 0.01 |
| A_51_P264673 | AK083198  | Prlr      | 19116  | prolactin receptor                                                                      | -1.91 | 0.47 | 0.04 |
| A_51_P335770 | NM_027373 | Afap1     | 70292  | actin filament associated protein 1                                                     | -2.34 | 0.47 | 0.01 |
| A_52_P449417 | BC024687  | Vangl1    | 229658 | vang-like 1 (van gogh, Drosophila)                                                      | -1.99 | 0.47 | 0.03 |
| A_52_P571805 | AK014664  | 4833408D1 | 73789  | RIKEN cDNA 4833408D11 gene                                                              | -2.61 | 0.47 | 0.00 |
| A_52_P384508 | NM_145124 | Mib2      | 76580  | mindbomb homolog 2 (Drosophila)                                                         | -2.66 | 0.47 | 0.00 |
| A_52_P812648 | NA        | NA        | NA     | NA                                                                                      | -2.49 | 0.47 | 0.00 |
| A_52_P576041 | NM_016846 | Rgl1      | 19731  | ral guanine nucleotide dissociation stimulator,-like 1                                  | -2.04 | 0.47 | 0.02 |
| A_52_P215701 | AK133756  | Acp2      | 11432  | acid phosphatase 2, lysosomal                                                           | -2.50 | 0.47 | 0.00 |
| A_52_P185552 | NM_198305 | Klhl17    | 231003 | kelch-like 17 (Drosophila)                                                              | -2.53 | 0.47 | 0.00 |
| A_51_P124993 | NM_133952 | Unc45a    | 101869 | unc-45 homolog A (C. elegans)                                                           | -2.57 | 0.47 | 0.00 |
| A_52_P163021 | NM_182959 | Slc17a8   | 216227 | solute carrier family 17 (sodium-dependent inorganic phosphate cotransporter), member 8 | -1.63 | 0.47 | 0.11 |
| A_51_P150722 | NM_010748 | Lyst      | 17101  | lysosomal trafficking regulator                                                         | -1.60 | 0.47 | 0.13 |
| A_51_P492742 | AK004937  | Bbs10     | 71769  | Bardet-Biedl syndrome 10 (human)                                                        | -2.28 | 0.47 | 0.01 |
| A_52_P683441 | NM_007602 | Capn5     | 12337  | calpain 5                                                                               | -2.79 | 0.47 | 0.00 |

|              |           |           |        |                                                                                              |       |      |      |
|--------------|-----------|-----------|--------|----------------------------------------------------------------------------------------------|-------|------|------|
| A_52_P393392 | NM_153526 | Insig1    | 231070 | insulin induced gene 1                                                                       | -2.22 | 0.47 | 0.01 |
| A_52_P78373  | NM_011366 | Sorbs3    | 20410  | sorbin and SH3 domain containing 3                                                           | -2.51 | 0.47 | 0.00 |
| A_51_P137094 | NM_015772 | Sall2     | 50524  | sal-like 2 (Drosophila)                                                                      | -2.77 | 0.47 | 0.00 |
| A_52_P686383 | AF127140  | Fgfr4     | 14186  | fibroblast growth factor receptor 4                                                          | -2.39 | 0.47 | 0.01 |
| A_52_P250543 | AK077686  | Zfp367    | 238673 | zinc finger protein 367                                                                      | -2.67 | 0.47 | 0.00 |
| A_51_P291529 | AK077428  | NA        | NA     | NA                                                                                           | -2.10 | 0.47 | 0.01 |
| A_51_P394558 | XM_194371 | Dchs1     | 233651 | dachsous 1 (Drosophila)                                                                      | -2.26 | 0.47 | 0.01 |
| A_52_P656845 | NM_008639 | Mtnr1a    | 17773  | melatonin receptor 1A                                                                        | -2.36 | 0.47 | 0.01 |
| A_51_P124535 | NM_008590 | Mest      | 17294  | mesoderm specific transcript                                                                 | -1.98 | 0.47 | 0.03 |
| A_52_P557293 | NM_015775 | Tmprss2   | 50528  | transmembrane protease, serine 2                                                             | -2.12 | 0.47 | 0.01 |
| A_52_P672232 | BC020092  | Pnpla6    | 50767  | patatin-like phospholipase domain containing 6                                               | -1.97 | 0.47 | 0.03 |
| A_52_P207335 | NM_025944 | Z810432L1 | 67063  | RIKEN cDNA 2810432L12 gene                                                                   | -1.88 | 0.47 | 0.04 |
| A_51_P270960 | BC031532  | Ppp2r3a   | 235542 | protein phosphatase 2, regulatory subunit B'', alpha                                         | -2.60 | 0.46 | 0.00 |
| A_52_P475423 | NM_177678 | Ablim2    | 231148 | actin-binding LIM protein 2                                                                  | -2.87 | 0.46 | 0.00 |
| A_52_P593200 | NM_029688 | Srxn1     | 76650  | sulfiredoxin 1 homolog (S. cerevisiae)                                                       | -2.14 | 0.46 | 0.01 |
| A_52_P534235 | NM_011481 | Srms      | 20811  | src-related kinase lacking C-terminal regulatory tyrosine and N-terminal myristylation sites | -2.55 | 0.46 | 0.00 |
| A_52_P996032 | AK041714  | A630031M  | 654438 | Riken cDNA A630031M23 gene                                                                   | -2.31 | 0.46 | 0.01 |
| A_51_P436254 | AK003775  | 1110018F1 | 68594  | RIKEN cDNA 1110018F16 gene                                                                   | -1.99 | 0.46 | 0.03 |
| A_52_P467060 | AK033702  | NA        | NA     | NA                                                                                           | -2.25 | 0.46 | 0.01 |
| A_51_P475689 | NM_026972 | Cd209b    | 69165  | CD209b antigen                                                                               | -2.11 | 0.46 | 0.01 |
| A_51_P114287 | AK077833  | Cpsf6     | 432508 | cleavage and polyadenylation specific factor 6                                               | -2.92 | 0.46 | 0.00 |
| A_52_P672803 | NM_008906 | Ctsa      | 19025  | cathepsin A                                                                                  | -2.17 | 0.46 | 0.01 |
| A_51_P469252 | NM_172817 | Zfp647    | 239546 | zinc finger protein 647                                                                      | -2.51 | 0.46 | 0.00 |
| A_52_P585794 | NM_177226 | Zfp629    | 320683 | zinc finger protein 629                                                                      | -2.85 | 0.46 | 0.00 |
| A_51_P247694 | NM_173036 | Gpr97     | 54672  | G protein-coupled receptor 97                                                                | -2.19 | 0.46 | 0.01 |
| A_52_P136264 | NM_201406 | Pigs      | 276846 | phosphatidylinositol glycan anchor biosynthesis, class S                                     | -1.99 | 0.46 | 0.03 |
| A_52_P662216 | NM_146157 | C230096C1 | 230866 | RIKEN cDNA C230096C10 gene                                                                   | -2.31 | 0.46 | 0.01 |
| A_51_P348665 | NM_016894 | Ramp1     | 51801  | receptor (calcitonin) activity modifying protein 1                                           | -2.09 | 0.46 | 0.02 |
| A_52_P456994 | NM_172562 | Tada2a    | 217031 | transcriptional adaptor 2A                                                                   | -2.78 | 0.46 | 0.00 |
| A_51_P138830 | NM_198108 | Morn4     | 226123 | MORN repeat containing 4                                                                     | -2.37 | 0.46 | 0.01 |
| A_52_P77093  | NM_028166 | 1600014C1 | 172244 | RIKEN cDNA 1600014C10 gene                                                                   | -2.31 | 0.46 | 0.01 |

|              |           |           |        |                                                                       |       |      |      |
|--------------|-----------|-----------|--------|-----------------------------------------------------------------------|-------|------|------|
| A_51_P111285 | V00830    | Krt10     | 16661  | keratin 10                                                            | -2.55 | 0.46 | 0.00 |
| A_52_P362128 | NM_026869 | Pygo2     | 68911  | pygopus 2                                                             | -2.22 | 0.46 | 0.01 |
| A_51_P414518 | NM_019682 | Dynll1    | 56455  | dynein light chain LC8-type 1                                         | -1.92 | 0.46 | 0.03 |
| A_51_P299670 | BC060624  | Rcc2      | 108911 | regulator of chromosome condensation 2                                | -2.39 | 0.46 | 0.01 |
| A_52_P268720 | AK020667  | Helz      | 78455  | helicase with zinc finger domain                                      | -2.17 | 0.46 | 0.01 |
| A_52_P255849 | NM_027773 | Fam57a    | 116972 | family with sequence similarity 57, member A                          | -2.66 | 0.46 | 0.00 |
| A_52_P63368  | BC066830  | Wdr67     | 210544 | WD repeat domain 67                                                   | -2.05 | 0.46 | 0.02 |
| A_52_P641849 | NM_027143 | Khynyn    | 219094 | KH and NYN domain containing                                          | -2.62 | 0.46 | 0.00 |
| A_51_P437188 | NM_026377 | 6330577E1 | 67788  | RIKEN cDNA 6330577E15 gene                                            | -2.68 | 0.46 | 0.00 |
| A_51_P332286 | NM_153525 | Tmem41b   | 233724 | transmembrane protein 41B                                             | -2.48 | 0.46 | 0.00 |
| A_52_P618197 | AK143726  | Odf2      | 18286  | outer dense fiber of sperm tails 2                                    | -1.80 | 0.46 | 0.05 |
| A_51_P384936 | NM_027442 | Ddo       | 70503  | D-aspartate oxidase                                                   | -2.22 | 0.46 | 0.01 |
| A_51_P372936 | NM_028054 | Zfyve19   | 72008  | zinc finger, FYVE domain containing 19                                | -3.03 | 0.46 | 0.00 |
| A_51_P183672 | BC006653  | MGC7817   | 620031 | hypothetical protein LOC620031                                        | -2.37 | 0.46 | 0.01 |
| A_51_P266987 | NM_013615 | Odf2      | 18286  | outer dense fiber of sperm tails 2                                    | -2.05 | 0.46 | 0.02 |
| A_51_P119715 | NM_026794 | Deb1      | 26901  | differentially expressed in B16F10 1                                  | -2.42 | 0.46 | 0.00 |
| A_51_P465600 | NM_130879 | Usp48     | 170707 | ubiquitin specific peptidase 48                                       | -2.72 | 0.46 | 0.00 |
| A_51_P176387 | AK077784  | Hook3     | 320191 | hook homolog 3 (Drosophila)                                           | -1.32 | 0.46 | 0.40 |
| A_51_P492743 | AK004937  | Bbs10     | 71769  | Bardet-Biedl syndrome 10 (human)                                      | -2.31 | 0.46 | 0.01 |
| A_51_P429246 | NM_013909 | Fbxl6     | 30840  | F-box and leucine-rich repeat protein 6                               | -2.46 | 0.46 | 0.00 |
| A_52_P257987 | NM_021549 | Pnkp      | 59047  | polynucleotide kinase 3'-phosphatase                                  | -2.81 | 0.46 | 0.00 |
| A_52_P386558 | AK019982  | Tanc2     | 77097  | tetratricopeptide repeat, ankyrin repeat and coiled-coil containing 2 | -1.95 | 0.46 | 0.03 |
| A_52_P177293 | NM_029394 | Snx24     | 69226  | sorting nexin 24                                                      | -2.13 | 0.46 | 0.01 |
| A_52_P459238 | NA        | NA        | NA     | NA                                                                    | -2.76 | 0.46 | 0.00 |
| A_52_P678246 | BC058761  | Upf3b     | 68134  | UPF3 regulator of nonsense transcripts homolog B (yeast)              | -2.41 | 0.46 | 0.00 |
| A_51_P517215 | NM_016719 | Grb14     | 50915  | growth factor receptor bound protein 14                               | -1.85 | 0.46 | 0.04 |
| A_51_P110381 | NM_144943 | Cd207     | 246278 | CD207 antigen                                                         | -1.75 | 0.46 | 0.07 |
| A_52_P297212 | NM_023685 | Zkscan3   | 72739  | zinc finger with KRAB and SCAN domains 3                              | -1.85 | 0.46 | 0.04 |
| A_51_P454234 | AK154409  | 130001811 | 72325  | RIKEN cDNA 1300018117 gene                                            | -2.37 | 0.46 | 0.01 |
| A_51_P309338 | NM_021022 | Abcb11    | 27413  | ATP-binding cassette, sub-family B (MDR/TAP), member 11               | -2.29 | 0.46 | 0.01 |

|               |           |          |        |                                                                                         |       |      |      |
|---------------|-----------|----------|--------|-----------------------------------------------------------------------------------------|-------|------|------|
| A_52_P362033  | BC045521  | Polr2e   | 66420  | polymerase (RNA) II (DNA directed) polypeptide E                                        | -2.64 | 0.46 | 0.00 |
| A_51_P190690  | NM_025369 | Mrps36   | 66128  | mitochondrial ribosomal protein S36                                                     | -2.13 | 0.46 | 0.01 |
| A_51_P169886  | NM_001039 | Nelf     | 56876  | nasal embryonic LHRH factor                                                             | -2.47 | 0.46 | 0.00 |
| A_51_P349036  | NM_172339 | Snapc4   | 227644 | small nuclear RNA activating complex, polypeptide 4                                     | -2.09 | 0.46 | 0.02 |
| A_51_P143142  | NM_027204 | Mrpl12   | 56282  | mitochondrial ribosomal protein L12                                                     | -2.71 | 0.46 | 0.00 |
| A_52_P432787  | NM_026794 | Deb1     | 26901  | differentially expressed in B16F10 1                                                    | -2.66 | 0.46 | 0.00 |
| A_51_P200564  | NA        | NA       | NA     | NA                                                                                      | -2.61 | 0.46 | 0.00 |
| A_51_P242043  | NM_053272 | Dhcr24   | 74754  | 24-dehydrocholesterol reductase                                                         | -1.97 | 0.46 | 0.03 |
| A_51_P237585  | NM_172793 | Btnl9    | 237754 | butyrophilin-like 9                                                                     | -2.58 | 0.46 | 0.00 |
| A_51_P282523  | NM_054044 | Gpr124   | 78560  | G protein-coupled receptor 124                                                          | -2.38 | 0.46 | 0.01 |
| A_51_P416046  | BC020156  | Trim41   | 211007 | tripartite motif-containing 41                                                          | -2.31 | 0.46 | 0.01 |
| A_51_P200044  | NM_025349 | Lsm7     | 66094  | LSM7 homolog, U6 small nuclear RNA associated ( <i>S. cerevisiae</i> )                  | -2.61 | 0.46 | 0.00 |
| A_51_P106322  | NM_134116 | Gpsm3    | 106512 | G-protein signalling modulator 3 (AGS3-like, <i>C. elegans</i> )                        | -2.57 | 0.46 | 0.00 |
| A_51_P167562  | NM_133362 | Erdr1    | 170942 | erythroid differentiation regulator 1                                                   | -1.41 | 0.46 | 0.27 |
| A_51_P510782  | NM_130859 | Card10   | 105844 | caspase recruitment domain family, member 10                                            | -1.88 | 0.46 | 0.04 |
| A_52_P597134  | NM_033134 | Inpp5e   | 64436  | inositol polyphosphate-5-phosphatase E                                                  | -2.47 | 0.46 | 0.00 |
| A_52_P507498  | AK011113  | Plxnc1   | 54712  | plexin C1                                                                               | -1.52 | 0.46 | 0.18 |
| A_51_P217369  | NM_027880 | Telo2    | 71718  | TEL2, telomere maintenance 2, homolog ( <i>S. cerevisiae</i> )                          | -2.35 | 0.46 | 0.01 |
| A_52_P170754  | NM_146045 | B4galt7  | 218271 | xylosylprotein beta1,4-galactosyltransferase, polypeptide 7 (galactosyltransferase I)   | -2.38 | 0.46 | 0.01 |
| A_51_P357838  | XM_128528 | BC003965 | 214489 | cDNA sequence BC003965                                                                  | -2.65 | 0.46 | 0.00 |
| A_51_P301508  | NM_011385 | Ski      | 20481  | ski sarcoma viral oncogene homolog (avian)                                              | -2.40 | 0.46 | 0.00 |
| A_51_P425833  | NM_033322 | Lztf1    | 93730  | leucine zipper transcription factor-like 1                                              | -2.79 | 0.46 | 0.00 |
| A_52_P268715  | AK020667  | Helz     | 78455  | helicase with zinc finger domain                                                        | -2.00 | 0.46 | 0.02 |
| A_52_P369562  | NM_013831 | Pstpip2  | 19201  | proline-serine-threonine phosphatase-interacting protein 2                              | -2.20 | 0.46 | 0.01 |
| A_52_P1179742 | AK040669  | NA       | NA     | NA                                                                                      | -2.25 | 0.46 | 0.01 |
| A_51_P190111  | NM_008566 | Mcm5     | 17218  | minichromosome maintenance deficient 5, cell division cycle 46 ( <i>S. cerevisiae</i> ) | -1.93 | 0.46 | 0.03 |

|              |           |                 |        |                                                                                                                     |       |      |      |
|--------------|-----------|-----------------|--------|---------------------------------------------------------------------------------------------------------------------|-------|------|------|
| A_51_P494430 | NM_031166 | Id4             | 15904  | inhibitor of DNA binding 4                                                                                          | -2.83 | 0.46 | 0.00 |
| A_51_P282404 | NM_013457 | Add1            | 11518  | adducin 1 (alpha)                                                                                                   | -2.76 | 0.46 | 0.00 |
| A_52_P629487 | NM_009150 | Selenbp1        | 20341  | selenium binding protein 1                                                                                          | -1.46 | 0.46 | 0.21 |
| A_52_P627256 | AK087889  | E330037G1102220 |        | RIKEN cDNA E330037G11 gene                                                                                          | -2.66 | 0.46 | 0.00 |
| A_51_P198488 | NM_026909 | Thap7           | 69009  | THAP domain containing 7                                                                                            | -2.84 | 0.46 | 0.00 |
| A_51_P370380 | NM_023697 | Rdh14           | 105014 | retinol dehydrogenase 14 (all-trans and 9-cis)                                                                      | -2.66 | 0.46 | 0.00 |
| A_51_P308048 | NM_027294 | Cmtm8           | 70031  | CKLF-like MARVEL transmembrane domain containing 8                                                                  | -3.00 | 0.46 | 0.00 |
| A_52_P265584 | AK003102  | 1810011O169068  |        | RIKEN cDNA 1810011O10 gene<br>solute carrier family 25 (mitochondrial thiamine<br>pyrophosphate carrier), member 19 | -1.45 | 0.46 | 0.22 |
| A_51_P467006 | NM_026071 | Slc25a19        | 67283  | phosphatidylserine synthase 2                                                                                       | -2.31 | 0.46 | 0.01 |
| A_51_P185713 | NM_013782 | Ptdss2          | 27388  | arginine vasopressin-induced 1                                                                                      | -2.58 | 0.46 | 0.00 |
| A_51_P261087 | NM_027106 | Avpi1           | 69534  | B-cell CLL/lymphoma 7C                                                                                              | -1.77 | 0.46 | 0.07 |
| A_52_P935906 | NM_009746 | Bcl7c           | 12055  |                                                                                                                     | -1.78 | 0.46 | 0.06 |
| A_51_P461031 | NM_172416 | Ostm1           | 14628  | osteopetrosis associated transmembrane protein 1                                                                    | -2.88 | 0.46 | 0.00 |
| A_51_P314065 | NM_019975 | Hacl1           | 56794  | 2-hydroxyacyl-CoA lyase 1                                                                                           | -2.32 | 0.46 | 0.01 |
| A_51_P145520 | NM_023059 | Sigirr          | 24058  | single immunoglobulin and toll-interleukin 1 receptor<br>(TIR) domain                                               | -2.98 | 0.46 | 0.00 |
| A_51_P221535 | NM_175287 | A430005L197159  |        | RIKEN cDNA A430005L14 gene                                                                                          | -1.98 | 0.46 | 0.03 |
| A_51_P394735 | NM_133962 | Arhgef18        | 102098 | rho/rac guanine nucleotide exchange factor (GEF) 18                                                                 | -2.18 | 0.46 | 0.01 |
| A_52_P73214  | NM_172977 | Gtf3c4          | 269252 | general transcription factor IIIC, polypeptide 4                                                                    | -2.34 | 0.46 | 0.01 |
| A_51_P447248 | NM_175105 | Aqp11           | 66333  | aquaporin 11                                                                                                        | -1.88 | 0.46 | 0.04 |
| A_52_P35164  | NM_001024 | Trp53i13        | 216964 | transformation related protein 53 inducible protein 13                                                              | -2.59 | 0.46 | 0.00 |
| A_51_P171107 | NM_026239 | Tmem35          | 67564  | transmembrane protein 35                                                                                            | -1.50 | 0.46 | 0.20 |
| A_52_P384594 | AK090134  | Anapc1          | 17222  | anaphase promoting complex subunit 1                                                                                | -2.83 | 0.46 | 0.00 |
| A_51_P346747 | NM_013919 | Usp21           | 30941  | ubiquitin specific peptidase 21                                                                                     | -1.77 | 0.46 | 0.06 |
| A_52_P161806 | NM_027136 | Ovca2           | 246257 | candidate tumor suppressor in ovarian cancer 2                                                                      | -2.54 | 0.46 | 0.00 |
| A_51_P273979 | NM_007681 | Cenpa           | 12615  | centromere protein A                                                                                                | -2.50 | 0.46 | 0.00 |
| A_51_P341349 | NM_024433 | Mtap            | 66902  | methylthioadenosine phosphorylase                                                                                   | -1.81 | 0.46 | 0.05 |



|              |           |           |        |                                                                                           |       |      |      |
|--------------|-----------|-----------|--------|-------------------------------------------------------------------------------------------|-------|------|------|
| A_51_P309854 | NM_080465 | Kcnn2     | 140492 | potassium intermediate/small conductance calcium-activated channel, subfamily N, member 2 | -1.74 | 0.46 | 0.07 |
| A_51_P262421 | NM_023645 | Kdelc1    | 72050  | KDEL (Lys-Asp-Glu-Leu) containing 1                                                       | -2.74 | 0.46 | 0.00 |
| A_51_P178022 | NM_138752 | Plekhg2   | 101497 | pleckstrin homology domain containing, family G (with RhoGef domain) member 2             | -3.02 | 0.46 | 0.00 |
| A_52_P237899 | NM_029432 | 4930402H2 | 228602 | RIKEN cDNA 4930402H24 gene                                                                | -1.97 | 0.46 | 0.03 |
| A_52_P411015 | AK045150  | B130040O2 | 320962 | RIKEN cDNA B130040O20 gene                                                                | -1.48 | 0.46 | 0.20 |
| A_51_P479321 | NM_080575 | Acss1     | 68738  | acyl-CoA synthetase short-chain family member 1                                           | -1.63 | 0.46 | 0.11 |
| A_51_P118779 | NM_172725 | C330006K0 | 231855 | RIKEN cDNA C330006K01 gene                                                                | -2.60 | 0.46 | 0.00 |
| A_52_P411205 | BC028536  | Gm10055   | 627270 | predicted gene 10055                                                                      | -1.88 | 0.46 | 0.04 |
| A_51_P214663 | NM_016785 | Tpmt      | 22017  | thiopurine methyltransferase                                                              | -2.01 | 0.46 | 0.02 |
| A_51_P273667 | NM_011441 | Sox17     | 20671  | SRY-box containing gene 17                                                                | -2.11 | 0.46 | 0.01 |
| A_51_P277941 | NM_023525 | Cad       | 69719  | carbamoyl-phosphate synthetase 2, aspartate transcarbamylase, and dihydroorotase          | -1.25 | 0.46 | 0.53 |
| A_52_P673499 | NM_009171 | Shmt1     | 20425  | serine hydroxymethyltransferase 1 (soluble)                                               | -2.08 | 0.46 | 0.02 |
| A_51_P268563 | NM_007932 | Eng       | 13805  | endoglin                                                                                  | -2.38 | 0.46 | 0.01 |
| A_51_P332169 | NM_173390 | Nhsl1     | 215819 | NHS-like 1                                                                                | -2.26 | 0.46 | 0.01 |
| A_52_P588539 | NM_133854 | Snapin    | 20615  | SNAP-associated protein                                                                   | -1.57 | 0.46 | 0.15 |
| A_51_P114028 | NM_009746 | Bcl7c     | 12055  | B-cell CLL/lymphoma 7C                                                                    | -2.67 | 0.45 | 0.00 |
| A_51_P156158 | XM_129968 | Phlpp1    | 98432  | PH domain and leucine rich repeat protein phosphatase 1                                   | -1.64 | 0.45 | 0.11 |
| A_52_P359591 | NM_013744 | Zfp354b   | 27274  | zinc finger protein 354B                                                                  | -2.11 | 0.45 | 0.01 |
| A_51_P446469 | NM_010071 | Dok2      | 13449  | docking protein 2                                                                         | -2.37 | 0.45 | 0.01 |
| A_51_P176711 | NM_026165 | Slc25a46  | 67453  | solute carrier family 25, member 46                                                       | -2.60 | 0.45 | 0.00 |
| A_51_P346630 | NM_175203 | 4833408A1 | 173788 | RIKEN cDNA 4833408A19 gene                                                                | -2.77 | 0.45 | 0.00 |
| A_52_P468564 | NM_010002 | Cyp2c38   | 13097  | cytochrome P450, family 2, subfamily c, polypeptide 38                                    | -1.23 | 0.45 | 0.58 |
| A_51_P344399 | NM_030259 | Rilpl2    | 80291  | Rab interacting lysosomal protein-like 2                                                  | -2.99 | 0.45 | 0.00 |
| A_52_P405090 | BC066818  | Polr3g    | 67486  | polymerase (RNA) III (DNA directed) polypeptide G                                         | -1.66 | 0.45 | 0.11 |
| A_51_P330226 | NM_025901 | Polr3k    | 67005  | polymerase (RNA) III (DNA directed) polypeptide K                                         | -2.89 | 0.45 | 0.00 |

|              |           |            |        |                                                                                                              |       |      |      |
|--------------|-----------|------------|--------|--------------------------------------------------------------------------------------------------------------|-------|------|------|
| A_52_P103981 | NM_145589 | Prr14      | 233895 | proline rich 14                                                                                              | -1.88 | 0.45 | 0.04 |
| A_51_P400773 | NM_008233 | Hdgfrp2    | 15193  | hepatoma-derived growth factor, related protein 2                                                            | -2.79 | 0.45 | 0.00 |
| A_51_P476879 | NM_172907 | Olfml1     | 244198 | olfactomedin-like 1                                                                                          | -2.13 | 0.45 | 0.01 |
| A_51_P116298 | AK006122  | Slc17a9    | 228993 | solute carrier family 17, member 9                                                                           | -1.63 | 0.45 | 0.12 |
| A_52_P401059 | NA        | NA         | NA     | NA                                                                                                           | -2.60 | 0.45 | 0.00 |
| A_52_P676982 | AK082111  | Vsig10     | 231668 | V-set and immunoglobulin domain containing 10                                                                | -1.99 | 0.45 | 0.03 |
| A_52_P556804 | NA        | NA         | NA     | NA                                                                                                           | -2.09 | 0.45 | 0.02 |
| A_51_P487244 | NM_001003 | Adamts7    | 108153 | a disintegrin-like and metallopeptidase (reprolysin type) with thrombospondin type 1 motif, 7                | -2.12 | 0.45 | 0.01 |
| A_51_P240363 | NM_026057 | Zfp422     | 67255  | zinc finger protein 422                                                                                      | -2.78 | 0.45 | 0.00 |
| A_52_P131915 | NM_030138 | Acap2      | 78618  | ArfGAP with coiled-coil, ankyrin repeat and PH domains 2                                                     | -2.31 | 0.45 | 0.01 |
| A_52_P451355 | NM_011372 | St6galnac3 | 20447  | ST6 (alpha-N-acetyl-neuraminy-2,3-beta-galactosyl-1,3)-N-acetylgalactosaminide alpha-2,6-sialyltransferase 3 | -2.09 | 0.45 | 0.02 |
| A_51_P197883 | NM_028457 | Dem1       | 73172  | defects in morphology 1 homolog ( <i>S. cerevisiae</i> )                                                     | -2.23 | 0.45 | 0.01 |
| A_51_P281663 | NM_172660 | D2Wsu81e   | 227695 | DNA segment, Chr 2, Wayne State University 81, expressed                                                     | -2.48 | 0.45 | 0.00 |
| A_51_P323299 | NM_011588 | Trim28     | 21849  | tripartite motif-containing 28                                                                               | -2.54 | 0.45 | 0.00 |
| A_51_P384441 | NM_177672 | Tmem201    | 230917 | transmembrane protein 201                                                                                    | -2.21 | 0.45 | 0.01 |
| A_51_P163624 | AK044029  | Chadl      | 214685 | chondroadherin-like                                                                                          | -2.35 | 0.45 | 0.01 |
| A_51_P497563 | NM_172269 | Vps18      | 228545 | vacuolar protein sorting 18 (yeast)                                                                          | -2.96 | 0.45 | 0.00 |
| A_51_P486618 | NM_172398 | Akr1b10    | 67861  | aldo-keto reductase family 1, member B10 (aldose reductase)                                                  | -1.50 | 0.45 | 0.20 |
| A_52_P572537 | NM_001005 | Mreg       | 381269 | melanoregulin                                                                                                | -2.16 | 0.45 | 0.01 |
| A_52_P248764 | NM_145475 | Cerk       | 223753 | ceramide kinase                                                                                              | -2.36 | 0.45 | 0.01 |
| A_52_P237755 | NA        | NA         | NA     | NA                                                                                                           | -2.40 | 0.45 | 0.01 |
| A_52_P206762 | NM_026057 | Zfp422     | 67255  | zinc finger protein 422                                                                                      | -2.80 | 0.45 | 0.00 |
| A_52_P222967 | NM_178873 | Adck2      | 57869  | aarF domain containing kinase 2                                                                              | -2.42 | 0.45 | 0.00 |
| A_51_P158210 | NM_008564 | Mcm2       | 17216  | minichromosome maintenance deficient 2 mitotin ( <i>S. cerevisiae</i> )                                      | -2.10 | 0.45 | 0.02 |
| A_51_P508683 | NM_173387 | Zfp879     | 214779 | zinc finger protein 879                                                                                      | -2.27 | 0.45 | 0.01 |

|              |           |                 |        |                                                            |       |      |      |
|--------------|-----------|-----------------|--------|------------------------------------------------------------|-------|------|------|
| A_51_P504478 | NM_133835 | Ubac1           | 98766  | ubiquitin associated domain containing 1                   | -2.62 | 0.45 | 0.00 |
| A_52_P427134 | NM_032544 | Gtpbp3          | 70359  | GTP binding protein 3                                      | -2.34 | 0.45 | 0.01 |
| A_51_P279552 | NM_016900 | Cav2            | 12390  | caveolin 2                                                 | -2.73 | 0.45 | 0.00 |
| A_51_P127215 | AK033655  | Sesn3           | 75747  | sestrin 3                                                  | -3.02 | 0.45 | 0.00 |
| A_51_P498093 | NM_008235 | Hes1            | 15205  | hairy and enhancer of split 1 (Drosophila)                 | -1.66 | 0.45 | 0.11 |
| A_52_P574945 | AK048993  | 1500026H169002  |        | RIKEN cDNA 1500026H17 gene                                 | -2.13 | 0.45 | 0.01 |
| A_52_P374314 | NA        | NA              | NA     | NA                                                         | -2.76 | 0.45 | 0.00 |
| A_51_P232371 | NM_138672 | Stab1           | 192187 | stabilin 1                                                 | -2.56 | 0.45 | 0.00 |
|              |           |                 |        | solute carrier family 2 (facilitated glucose transporter), |       |      |      |
| A_51_P217498 | NM_009204 | Slc2a4          | 20528  | member 4                                                   | -1.61 | 0.45 | 0.13 |
| A_51_P348592 | NM_172758 | Slc38a7         | 234595 | solute carrier family 38, member 7                         | -2.33 | 0.45 | 0.01 |
| A_52_P72718  | NM_029985 | Lrrc42          | 77809  | leucine rich repeat containing 42                          | -2.01 | 0.45 | 0.02 |
| A_51_P118704 | NM_007823 | Cyp4b1          | 13120  | cytochrome P450, family 4, subfamily b, polypeptide 1      | -2.11 | 0.45 | 0.01 |
| A_51_P118671 | XM_992408 | NA              | NA     | NA                                                         | -2.06 | 0.45 | 0.02 |
| A_51_P202857 | NM_025866 | Cdca7           | 66953  | cell division cycle associated 7                           | -2.54 | 0.45 | 0.00 |
| A_52_P196105 | NM_175274 | Ttyh3           | 78339  | tweety homolog 3 (Drosophila)                              | -2.50 | 0.45 | 0.00 |
| A_52_P32502  | AK144564  | Ccdc58          | 381045 | coiled-coil domain containing 58                           | -2.10 | 0.45 | 0.01 |
| A_51_P236042 | NM_008874 | Plcb3           | 18797  | phospholipase C, beta 3                                    | -2.11 | 0.45 | 0.01 |
| A_51_P125648 | AK153937  | Vwce            | 71768  | von Willebrand factor C and EGF domains                    | -2.64 | 0.45 | 0.00 |
| A_52_P290020 | NM_152801 | Arhgef6         | 73341  | Rac/Cdc42 guanine nucleotide exchange factor (GEF) 6       | -2.28 | 0.45 | 0.01 |
| A_52_P351982 | NM_178347 | Cdc23           | 52563  | CDC23 (cell division cycle 23, yeast, homolog)             | -2.48 | 0.45 | 0.00 |
| A_52_P121192 | NM_145613 | C1qtnf5         | 235312 | C1q and tumor necrosis factor related protein 5            | -2.08 | 0.45 | 0.02 |
| A_51_P214557 | NM_010959 | Oit3            | 18302  | oncoprotein induced transcript 3                           | -2.49 | 0.45 | 0.00 |
| A_51_P434198 | NM_024213 | Anapc4          | 52206  | anaphase promoting complex subunit 4                       | -2.25 | 0.45 | 0.01 |
| A_51_P255373 | AK077895  | 2810013P067206  |        | RIKEN cDNA 2810013P06 gene                                 | -2.23 | 0.45 | 0.01 |
| A_52_P614472 | NM_028009 | Rpusd1          | 106707 | RNA pseudouridylate synthase domain containing 1           | -2.98 | 0.45 | 0.00 |
| A_52_P236619 | AK050412  | 181000811873625 |        | RIKEN cDNA 1810008118 gene                                 | -1.71 | 0.45 | 0.09 |
| A_51_P262757 | NM_001077 | Plin5           | 66968  | perilipin 5                                                | -1.90 | 0.45 | 0.04 |
| A_52_P27496  | NM_198423 | Bahcc1          | 268515 | BAH domain and coiled-coil containing 1                    | -2.55 | 0.45 | 0.00 |
| A_51_P464394 | NM_031180 | Klb             | 83379  | klotho beta                                                | -1.81 | 0.45 | 0.05 |
| A_51_P221972 | NM_027446 | Fam86           | 70511  | family with sequence similarity 86                         | -2.82 | 0.45 | 0.00 |

|              |                           |        |                                                                                     |       |      |      |
|--------------|---------------------------|--------|-------------------------------------------------------------------------------------|-------|------|------|
| A_51_P266644 | NM_001013: Sesn1          | 140742 | sestrin 1                                                                           | -1.76 | 0.45 | 0.07 |
| A_51_P105810 | NM_148928 Gtf3c5          | 70239  | general transcription factor IIIC, polypeptide 5                                    | -2.64 | 0.45 | 0.00 |
| A_51_P115988 | NM_024480 Sh3bp5l         | 79566  | SH3 binding domain protein 5 like                                                   | -1.10 | 0.45 | 0.91 |
| A_51_P237752 | NM_008986 Ptrf            | 19285  | polymerase I and transcript release factor                                          | -2.08 | 0.45 | 0.02 |
| A_51_P285217 | BC031575 4921513D2223989  |        | RIKEN cDNA 4921513D23 gene                                                          | -2.22 | 0.45 | 0.01 |
| A_51_P169374 | NM_027172 2310046K069698  |        | RIKEN cDNA 2310046K01 gene                                                          | -1.46 | 0.45 | 0.22 |
| A_52_P545613 | NM_010187 Fcgr2b          | 14130  | Fc receptor, IgG, low affinity IIb                                                  | -1.16 | 0.45 | 0.77 |
| A_52_P444457 | NM_026828 Dnlz            | 52838  | DNL-type zinc finger                                                                | -2.57 | 0.45 | 0.00 |
| A_52_P273098 | NM_018861 Slc1a4          | 55963  | solute carrier family 1 (glutamate/neutral amino acid transporter), member 4        | -2.04 | 0.45 | 0.02 |
| A_52_P138723 | NM_153799 Edc3            | 353190 | enhancer of mRNA decapping 3 homolog ( <i>S. cerevisiae</i> )                       | -2.24 | 0.45 | 0.01 |
| A_52_P150903 | AK041002 Tubb6            | 67951  | tubulin, beta 6                                                                     | -2.17 | 0.45 | 0.01 |
| A_51_P401876 | NM_028197 2510003E072320  |        | RIKEN cDNA 2510003E04 gene                                                          | -2.46 | 0.45 | 0.00 |
| A_51_P509223 | NM_145760 Arfgap1         | 228998 | ADP-ribosylation factor GTPase activating protein 1                                 | -2.07 | 0.45 | 0.02 |
| A_52_P479377 | NM_172725 C330006K0231855 |        | RIKEN cDNA C330006K01 gene                                                          | -2.71 | 0.45 | 0.00 |
| A_52_P336768 | XM_137057 NA              | NA     | NA                                                                                  | -2.08 | 0.45 | 0.02 |
| A_52_P245620 | BB009967 NA               | NA     | NA                                                                                  | -2.24 | 0.45 | 0.01 |
| A_51_P438640 | NM_030138 Acap2           | 78618  | ArfGAP with coiled-coil, ankyrin repeat and PH domains 2                            | -2.03 | 0.45 | 0.02 |
| A_52_P661029 | NM_177392 Tmem220         | 338369 | transmembrane protein 220                                                           | -2.98 | 0.45 | 0.00 |
| A_51_P222071 | NM_153088 Ctdsp1          | 227292 | CTD (carboxy-terminal domain, RNA polymerase II, polypeptide A) small phosphatase 1 | -2.18 | 0.45 | 0.01 |
| A_51_P468780 | NM_025812 Hmg20a          | 66867  | high mobility group 20A                                                             | -3.18 | 0.45 | 0.00 |
| A_51_P334789 | NM_029385 Nudt16          | 75686  | nudix (nucleoside diphosphate linked moiety X)-type motif 16                        | -2.38 | 0.45 | 0.01 |
| A_51_P213045 | NM_022315 Smoc2           | 64074  | SPARC related modular calcium binding 2                                             | -1.66 | 0.45 | 0.11 |
| A_51_P352283 | BC043107 Cyb561d1         | 72023  | cytochrome b-561 domain containing 1                                                | -2.49 | 0.45 | 0.00 |
| A_51_P322273 | NM_008975 Ptp4a3          | 19245  | protein tyrosine phosphatase 4a3                                                    | -2.75 | 0.45 | 0.00 |
| A_51_P367395 | NM_138583 D16H22S68E27883 |        | DNA segment, Chr 16, human D22S680E, expressed                                      | -2.79 | 0.45 | 0.00 |
| A_52_P532957 | NM_001024 Zfp667          | 384763 | zinc finger protein 667                                                             | -2.31 | 0.45 | 0.01 |
| A_52_P615312 | NM_173757 Mrps27          | 218506 | mitochondrial ribosomal protein S27                                                 | -2.47 | 0.45 | 0.00 |

|              |           |           |        |                                                          |       |      |      |
|--------------|-----------|-----------|--------|----------------------------------------------------------|-------|------|------|
| A_52_P239536 | NM_181595 | Ppp1r9a   | 243725 | protein phosphatase 1, regulatory (inhibitor) subunit 9A | -2.08 | 0.45 | 0.02 |
| A_52_P548121 | NM_178869 | Ttll1     | 319953 | tubulin tyrosine ligase-like 1                           | -2.40 | 0.45 | 0.00 |
| A_52_P361462 | NM_174870 | Slc26a1   | 231583 | solute carrier family 26 (sulfate transporter), member 1 | -2.97 | 0.44 | 0.00 |
| A_51_P148573 | NM_009879 | Ift81     | 12589  | intraflagellar transport 81 homolog (Chlamydomonas)      | -2.47 | 0.44 | 0.00 |
| A_52_P456750 | NM_177583 | Aph1b     | 208117 | anterior pharynx defective 1b homolog (C. elegans)       | -2.58 | 0.44 | 0.00 |
| A_52_P450188 | NM_133215 | Mtmr4     | 170749 | myotubularin related protein 4                           | -3.16 | 0.44 | 0.00 |
| A_51_P520106 | NM_133883 | Adprhl2   | 100206 | ADP-ribosylhydrolase like 2                              | -2.26 | 0.44 | 0.01 |
| A_52_P325116 | BC070451  | Gramd1b   | 235283 | GRAM domain containing 1B                                | -2.25 | 0.44 | 0.01 |
| A_51_P504442 | NM_026175 | Sf3a1     | 67465  | splicing factor 3a, subunit 1                            | -2.59 | 0.44 | 0.00 |
| A_51_P455241 | NM_144857 | BC011248  | 224823 | cDNA sequence BC011248                                   | -3.32 | 0.44 | 0.00 |
| A_52_P258250 | AK050742  | B230217O1 | 320879 | RIKEN cDNA B230217O12 gene                               | -2.70 | 0.44 | 0.00 |
| A_51_P222522 | NM_023403 | Mesdc2    | 67943  | mesoderm development candidate 2                         | -2.36 | 0.44 | 0.01 |
| A_51_P114353 | NM_145582 | Ctu1      | 233189 | cytosolic thiouridylase subunit 1 homolog (S. pombe)     | -2.56 | 0.44 | 0.00 |
| A_51_P472799 | NM_027184 | Ipmk      | 69718  | inositol polyphosphate multikinase                       | -2.43 | 0.44 | 0.00 |
| A_52_P19245  | NM_022887 | Tsc1      | 64930  | tuberous sclerosis 1                                     | -2.09 | 0.44 | 0.02 |
| A_51_P351883 | NM_030180 | Usp54     | 78787  | ubiquitin specific peptidase 54                          | -2.88 | 0.44 | 0.00 |
| A_52_P236705 | NM_133229 | Ripply3   | 170765 | rippy3 homolog (zebrafish)                               | -3.01 | 0.44 | 0.00 |
| A_51_P201638 | NM_011676 | Unc119    | 22248  | unc-119 homolog (C. elegans)                             | -2.14 | 0.44 | 0.01 |
| A_51_P451758 | BC020147  | Rab3il1   | 74760  | RAB3A interacting protein (rabin3)-like 1                | -2.11 | 0.44 | 0.01 |
| A_51_P438527 | NM_028057 | Cyb5r1    | 72017  | cytochrome b5 reductase 1                                | -2.85 | 0.44 | 0.00 |
| A_51_P495767 | NM_011948 | Map3k4    | 26407  | mitogen-activated protein kinase kinase kinase 4         | -3.40 | 0.44 | 0.00 |
| A_51_P149534 | NM_026485 | Trabd     | 67976  | TraB domain containing                                   | -2.22 | 0.44 | 0.01 |
| A_51_P336635 | NM_134014 | Xpo1      | 103573 | exportin 1, CRM1 homolog (yeast)                         | -2.78 | 0.44 | 0.00 |
| A_52_P228667 | AK044329  | A930004D1 | 77940  | RIKEN cDNA A930004D18 gene                               | -2.45 | 0.44 | 0.00 |
| A_51_P170911 | NM_019651 | Ptpn9     | 56294  | protein tyrosine phosphatase, non-receptor type 9        | -1.74 | 0.44 | 0.07 |
| A_52_P383850 | NM_020032 | Poll      | 56626  | polymerase (DNA directed), lambda                        | -2.27 | 0.44 | 0.01 |
| A_52_P973604 | BC045521  | Polr2e    | 66420  | polymerase (RNA) II (DNA directed) polypeptide E         | -2.92 | 0.44 | 0.00 |

|              |           |           |        |                                                                    |       |      |      |
|--------------|-----------|-----------|--------|--------------------------------------------------------------------|-------|------|------|
| A_52_P598    | NM_011919 | Ing1      | 26356  | inhibitor of growth family, member 1                               | -2.13 | 0.44 | 0.01 |
| A_52_P465809 | XM_896131 | NA        | NA     | NA                                                                 | -2.30 | 0.44 | 0.01 |
| A_51_P454691 | AK160693  | 4930430F0 | 68281  | RIKEN cDNA 4930430F08 gene                                         | -2.62 | 0.44 | 0.00 |
| A_52_P654130 | NM_010952 | Oaz2      | 18247  | ornithine decarboxylase antizyme 2                                 | -2.87 | 0.44 | 0.00 |
| A_51_P155574 | NM_008989 | Pura      | 19290  | purine rich element binding protein A                              | -2.82 | 0.44 | 0.00 |
| A_51_P185846 | NM_017470 | Dnalc4    | 54152  | dynein, axonemal, light chain 4                                    | -2.54 | 0.44 | 0.00 |
| A_51_P503433 | NM_080555 | Ppap2b    | 67916  | phosphatidic acid phosphatase type 2B                              | -2.41 | 0.44 | 0.00 |
| A_51_P370090 | NM_008808 | Pdgfa     | 18590  | platelet derived growth factor, alpha                              | -1.92 | 0.44 | 0.04 |
| A_52_P402319 | NM_020048 | Med20     | 56771  | mediator complex subunit 20                                        | -2.62 | 0.44 | 0.00 |
| A_51_P308447 | AK087556  | Sae1      | 56459  | SUMO1 activating enzyme subunit 1                                  | -2.09 | 0.44 | 0.02 |
| A_51_P466824 | NM_018793 | Tyk2      | 54721  | tyrosine kinase 2                                                  | -2.65 | 0.44 | 0.00 |
| A_51_P490136 | NM_011896 | Spry1     | 24063  | sprouty homolog 1 (Drosophila)                                     | -2.04 | 0.44 | 0.02 |
| A_51_P404067 | NM_020048 | Med20     | 56771  | mediator complex subunit 20                                        | -2.43 | 0.44 | 0.00 |
| A_51_P366501 | NM_019951 | Sec11a    | 56529  | SEC11 homolog A (S. cerevisiae)                                    | -2.27 | 0.44 | 0.01 |
| A_52_P109098 | NM_027946 | Dcaf7     | 71833  | DDB1 and CUL4 associated factor 7                                  | -1.59 | 0.44 | 0.14 |
| A_51_P196127 | NM_011863 | Papss1    | 23971  | 3'-phosphoadenosine 5'-phosphosulfate synthase 1                   | -2.53 | 0.44 | 0.00 |
| A_52_P505192 | NM_010947 | Ntn3      | 18209  | netrin 3                                                           | -1.25 | 0.44 | 0.55 |
| A_51_P380401 | AK009937  | Cars2     | 71941  | cysteinyl-tRNA synthetase 2 (mitochondrial)(putative)              | -2.96 | 0.44 | 0.00 |
| A_51_P173212 | NM_144500 | Osbpl2    | 228983 | oxysterol binding protein-like 2                                   | -3.07 | 0.44 | 0.00 |
| A_51_P150555 | NM_053197 | Sfxn3     | 94280  | sideroflexin 3                                                     | -2.57 | 0.44 | 0.00 |
| A_51_P485731 | NM_031393 | Sytl1     | 269589 | synaptotagmin-like 1                                               | -1.86 | 0.44 | 0.04 |
| A_51_P366867 | X59728    | Gas5      | 14455  | growth arrest specific 5                                           | -2.08 | 0.44 | 0.02 |
| A_51_P311166 | NM_011398 | Slc25a14  | 20523  | solute carrier family 25 (mitochondrial carrier, brain), member 14 | -2.23 | 0.44 | 0.01 |
| A_52_P125550 | NM_007485 | Rhod      | 11854  | ras homolog gene family, member D                                  | -2.54 | 0.44 | 0.00 |
| A_51_P502892 | NM_008688 | Nfic      | 18029  | nuclear factor I/C                                                 | -1.93 | 0.44 | 0.03 |
| A_52_P542013 | BC057368  | Dock6     | 319899 | dedicator of cytokinesis 6                                         | -2.91 | 0.44 | 0.00 |
| A_51_P128096 | NM_016878 | Dnpep     | 13437  | aspartyl aminopeptidase                                            | -2.51 | 0.44 | 0.00 |
| A_52_P276302 | AK220545  | Tshz1     | 110796 | teashirt zinc finger family member 1                               | -2.65 | 0.44 | 0.00 |
| A_52_P498985 | NM_172993 | Zfp512    | 269639 | zinc finger protein 512                                            | -3.05 | 0.44 | 0.00 |
| A_51_P339344 | NM_029025 | Tmem81    | 74626  | transmembrane protein 81                                           | -2.28 | 0.44 | 0.01 |
| A_51_P141413 | NM_010796 | Clec10a   | 17312  | C-type lectin domain family 10, member A                           | -1.81 | 0.44 | 0.05 |

|               |           |           |        |                                                                                                 |       |      |      |
|---------------|-----------|-----------|--------|-------------------------------------------------------------------------------------------------|-------|------|------|
| A_52_P538170  | XM_132817 | NA        | NA     | NA                                                                                              | -1.90 | 0.44 | 0.04 |
| A_51_P245393  | NM_145993 | L3mbtl2   | 214669 | l(3)mbt-like 2 (Drosophila)                                                                     | -2.43 | 0.44 | 0.00 |
| A_51_P155303  | NM_199197 | 1110032A1 | 68731  | RIKEN cDNA 1110032A13 gene                                                                      | -2.36 | 0.44 | 0.01 |
| A_51_P158584  | NM_020032 | Poll      | 56626  | polymerase (DNA directed), lambda                                                               | -2.72 | 0.44 | 0.00 |
| A_51_P370470  | NM_030013 | Cyp20a1   | 77951  | cytochrome P450, family 20, subfamily A, polypeptide 1                                          | -1.84 | 0.44 | 0.04 |
| A_52_P71105   | NM_133210 | Sertad3   | 170742 | SERTA domain containing 3                                                                       | -2.18 | 0.44 | 0.01 |
| A_52_P217604  | NM_182996 | Zfp692    | 103836 | zinc finger protein 692                                                                         | -1.72 | 0.44 | 0.07 |
| A_52_P456977  | NM_016874 | Deaf1     | 54006  | (Drosophila)                                                                                    | -2.85 | 0.44 | 0.00 |
| A_51_P383459  | NM_021491 | Smpd3     | 58994  | sphingomyelin phosphodiesterase 3, neutral                                                      | -1.90 | 0.44 | 0.04 |
| A_52_P164161  | NM_020010 | Cyp51     | 13121  | cytochrome P450, family 51                                                                      | -1.99 | 0.44 | 0.03 |
| A_51_P190437  | NM_029115 | 4930455F2 | 74895  | RIKEN cDNA 4930455F23 gene                                                                      | -2.44 | 0.44 | 0.00 |
| A_51_P291460  | NM_001037 | NA        | NA     | NA                                                                                              | -1.85 | 0.44 | 0.04 |
| A_52_P571419  | NA        | NA        | NA     | NA                                                                                              | -1.47 | 0.44 | 0.21 |
| A_51_P465273  | NM_001029 | Mett11d1  | 52535  | methyltransferase 11 domain containing 1                                                        | -2.39 | 0.44 | 0.01 |
| A_52_P205572  | NM_019929 | Sumo3     | 20610  | SMT3 suppressor of mif two 3 homolog 3 (yeast)                                                  | -2.87 | 0.44 | 0.00 |
| A_51_P455906  | NM_027196 | Pold4     | 69745  | polymerase (DNA-directed), delta 4                                                              | -2.72 | 0.44 | 0.00 |
| A_52_P547486  | NM_016739 | Caprin1   | 53872  | cell cycle associated protein 1                                                                 | -1.59 | 0.44 | 0.14 |
| A_51_P208020  | AK004783  | Ulk3      | 71742  | unc-51-like kinase 3 (C. elegans)                                                               | -2.63 | 0.44 | 0.00 |
| A_52_P309494  | NM_025905 | Ttc23     | 67009  | tetratricopeptide repeat domain 23                                                              | -2.81 | 0.44 | 0.00 |
| A_51_P502614  | NM_026268 | Dusp6     | 67603  | dual specificity phosphatase 6                                                                  | -2.09 | 0.44 | 0.02 |
| A_52_P57101   | NM_010804 | Mllt10    | 17354  | myeloid/lymphoid or mixed-lineage leukemia (trithorax homolog, Drosophila); translocated to, 10 | -2.17 | 0.44 | 0.01 |
| A_52_P1164839 | NM_194268 | Onecut2   | 225631 | one cut domain, family member 2                                                                 | -2.08 | 0.44 | 0.02 |
| A_51_P322906  | NM_008010 | Fgfr3     | 14184  | fibroblast growth factor receptor 3                                                             | -2.82 | 0.44 | 0.00 |
| A_51_P423666  | NM_015796 | Fbxo17    | 50760  | F-box protein 17                                                                                | -2.78 | 0.44 | 0.00 |
| A_52_P113190  | NM_053214 | Myo1f     | 17916  | myosin IF                                                                                       | -2.96 | 0.44 | 0.00 |
| A_52_P282700  | NM_020256 | Zbtb33    | 56805  | zinc finger and BTB domain containing 33                                                        | -2.49 | 0.44 | 0.00 |
| A_52_P409731  | NM_020270 | Scamp5    | 56807  | secretory carrier membrane protein 5                                                            | -2.26 | 0.44 | 0.01 |
| A_51_P484200  | NM_153777 | Lrrc56    | 70552  | leucine rich repeat containing 56                                                               | -2.76 | 0.44 | 0.00 |
| A_52_P122664  | NM_010264 | Nr6a1     | 14536  | nuclear receptor subfamily 6, group A, member 1                                                 | -2.69 | 0.44 | 0.00 |

|              |           |           |        |                                                                             |       |      |      |
|--------------|-----------|-----------|--------|-----------------------------------------------------------------------------|-------|------|------|
| A_52_P55661  | NM_177870 | Slc5a6    | 330064 | solute carrier family 5 (sodium-dependent vitamin transporter), member 6    | -1.99 | 0.44 | 0.03 |
| A_52_P167114 | NM_130454 | Recql5    | 170472 | RecQ protein-like 5                                                         | -2.77 | 0.44 | 0.00 |
| A_51_P277153 | XM_139129 | NA        | NA     | NA                                                                          | -2.05 | 0.44 | 0.02 |
| A_52_P140005 | XM_355676 | NA        | NA     | NA                                                                          | -1.18 | 0.44 | 0.67 |
| A_52_P59784  | AK051199  | Grasp     | 56149  | GRP1 (general receptor for phosphoinositides 1)-associated scaffold protein | -2.35 | 0.44 | 0.01 |
| A_52_P613528 | NM_027218 | Clec4b1   | 69810  | C-type lectin domain family 4, member b1                                    | -2.17 | 0.44 | 0.01 |
| A_52_P270164 | NM_033270 | E2f6      | 50496  | E2F transcription factor 6                                                  | -2.64 | 0.44 | 0.00 |
| A_51_P240067 | NM_177462 | Zmym6     | 100177 | zinc finger, MYM-type 6                                                     | -2.35 | 0.44 | 0.01 |
| A_52_P358093 | BC094565  | Fbxo10    | 269529 | F-box protein 10                                                            | -2.47 | 0.44 | 0.00 |
| A_52_P630563 | NM_027652 | D5Wsu178  | 28042  | DNA segment, Chr 5, Wayne State University 178, expressed                   | -2.42 | 0.43 | 0.00 |
| A_51_P196973 | NM_013733 | Chaf1a    | 27221  | chromatin assembly factor 1, subunit A (p150)                               | -2.21 | 0.43 | 0.01 |
| A_52_P387564 | AK198605  | NA        | NA     | NA                                                                          | -2.23 | 0.43 | 0.01 |
| A_52_P470373 | NM_008702 | Nlk       | 18099  | nemo like kinase                                                            | -2.12 | 0.43 | 0.01 |
| A_51_P133670 | NM_026129 | Erp29     | 67397  | endoplasmic reticulum protein 29                                            | -2.72 | 0.43 | 0.00 |
| A_52_P188139 | NM_011305 | Rxra      | 20181  | retinoid X receptor alpha                                                   | -3.16 | 0.43 | 0.00 |
| A_51_P462862 | NM_145557 | 9430015G1 | 230996 | RIKEN cDNA 9430015G10 gene                                                  | -3.13 | 0.43 | 0.00 |
| A_51_P274173 | Z19521    | Ldlr      | 16835  | low density lipoprotein receptor                                            | -2.00 | 0.43 | 0.02 |
| A_52_P547612 | NM_178715 | Tmem30b   | 238257 | transmembrane protein 30B                                                   | -2.13 | 0.43 | 0.01 |
| A_52_P257472 | BC025846  | Prr12     | 233210 | proline rich 12                                                             | -3.06 | 0.43 | 0.00 |
| A_52_P228171 | NM_027652 | D5Wsu178  | 28042  | DNA segment, Chr 5, Wayne State University 178, expressed                   | -2.85 | 0.43 | 0.00 |
| A_52_P981179 | NA        | NA        | NA     | NA                                                                          | -2.45 | 0.43 | 0.00 |
| A_51_P181851 | NM_144872 | Eml3      | 225898 | echinoderm microtubule associated protein like 3                            | -2.84 | 0.43 | 0.00 |
| A_52_P514488 | NM_177788 | Exoc3l    | 277978 | exocyst complex component 3-like                                            | -3.11 | 0.43 | 0.00 |
| A_51_P263310 | NM_019814 | Higd1a    | 56295  | HIG1 domain family, member 1A                                               | -3.23 | 0.43 | 0.00 |
| A_51_P303728 | NM_172575 | Zfp277    | 246196 | zinc finger protein 277                                                     | -2.85 | 0.43 | 0.00 |
| A_51_P320401 | NM_009000 | Rab24     | 19336  | RAB24, member RAS oncogene family                                           | -2.48 | 0.43 | 0.00 |
| A_52_P204595 | BC059053  | Papd5     | 214627 | PAP associated domain containing 5                                          | -2.61 | 0.43 | 0.00 |
| A_52_P567469 | NM_178420 | NlrX1     | 270151 | NLR family member X1                                                        | -2.37 | 0.43 | 0.01 |
| A_52_P161400 | NM_178612 | Cnpy4     | 66455  | canopy 4 homolog (zebrafish)                                                | -2.34 | 0.43 | 0.01 |



|               |           |         |        |                                                                                                 |       |      |      |
|---------------|-----------|---------|--------|-------------------------------------------------------------------------------------------------|-------|------|------|
| A_52_P225584  | NM_026185 | Abhd15  | 67477  | abhydrolase domain containing 15                                                                | -2.73 | 0.43 | 0.00 |
| A_52_P138656  | NM_008854 | Prkaca  | 18747  | protein kinase, cAMP dependent, catalytic, alpha                                                | -3.07 | 0.43 | 0.00 |
| A_51_P313566  | NM_019390 | Lmna    | 16905  | lamin A                                                                                         | -2.46 | 0.43 | 0.00 |
| A_51_P238563  | NM_026212 | Agpat2  | 67512  | 1-acylglycerol-3-phosphate O-acyltransferase 2<br>(lysophosphatidic acid acyltransferase, beta) | -2.60 | 0.43 | 0.00 |
| A_51_P170641  | NM_030246 | Dcaf4   | 73828  | DDB1 and CUL4 associated factor 4                                                               | -2.87 | 0.43 | 0.00 |
| A_52_P157408  | NM_010952 | Oaz2    | 18247  | ornithine decarboxylase antizyme 2                                                              | -3.13 | 0.43 | 0.00 |
| A_51_P235644  | NM_054057 | Prosc   | 114863 | proline synthetase co-transcribed                                                               | -1.80 | 0.43 | 0.06 |
| A_51_P151433  | NM_026554 | Ncbp2   | 68092  | nuclear cap binding protein subunit 2                                                           | -2.72 | 0.43 | 0.00 |
| A_52_P43869   | NM_153525 | Tmem41b | 233724 | transmembrane protein 41B                                                                       | -2.89 | 0.43 | 0.00 |
| A_52_P240453  | NM_025901 | Polr3k  | 67005  | polymerase (RNA) III (DNA directed) polypeptide K                                               | -1.84 | 0.43 | 0.04 |
| A_52_P61811   | AK199797  | Nosip   | 66394  | nitric oxide synthase interacting protein                                                       | -3.13 | 0.43 | 0.00 |
| A_52_P1037467 | AK078794  | NA      | NA     | NA                                                                                              | -2.76 | 0.43 | 0.00 |
| A_51_P461504  | NM_007908 | Eef2k   | 13631  | eukaryotic elongation factor-2 kinase                                                           | -2.49 | 0.43 | 0.00 |
| A_52_P351418  | NM_134091 | Sgsm3   | 105835 | small G protein signaling modulator 3                                                           | -2.65 | 0.43 | 0.00 |
| A_51_P400909  | NM_011665 | Ube2i   | 22196  | ubiquitin-conjugating enzyme E2I                                                                | -2.36 | 0.43 | 0.01 |
| A_52_P272348  | NA        | NA      | NA     | NA                                                                                              | -2.37 | 0.43 | 0.01 |
| A_52_P304105  | NA        | NA      | NA     | NA                                                                                              | -2.67 | 0.43 | 0.00 |
| A_51_P106397  | NM_029239 | Prkd3   | 75292  | protein kinase D3                                                                               | -1.80 | 0.43 | 0.06 |
| A_52_P557249  | NM_025626 | Fam107b | 66540  | family with sequence similarity 107, member B                                                   | -2.21 | 0.43 | 0.01 |
| A_51_P339713  | NM_207207 | Mrps26  | 99045  | mitochondrial ribosomal protein S26                                                             | -2.28 | 0.43 | 0.01 |
| A_52_P159050  | BC059776  | Cds2    | 110911 | CDP-diacylglycerol synthase (phosphatidate<br>cytidyltransferase) 2                             | -2.81 | 0.43 | 0.00 |
| A_51_P285960  | NM_018758 | Apba3   | 57267  | amyloid beta (A4) precursor protein-binding, family A,<br>member 3                              | -2.62 | 0.43 | 0.00 |
| A_52_P16102   | NM_023525 | Cad     | 69719  | carbamoyl-phosphate synthetase 2, aspartate<br>transcarbamylase, and dihydroorotase             | -1.95 | 0.43 | 0.03 |
| A_51_P482508  | AK033099  | Sc4mol  | 66234  | sterol-C4-methyl oxidase-like                                                                   | -2.10 | 0.43 | 0.02 |
| A_52_P51479   | NM_178709 | Rnf214  | 235315 | ring finger protein 214                                                                         | -2.63 | 0.43 | 0.00 |
| A_51_P160344  | AK014046  | Cenpv   | 73139  | centromere protein V                                                                            | -2.67 | 0.43 | 0.00 |
| A_52_P365005  | NM_020625 | Zbtb22  | 81630  | zinc finger and BTB domain containing 22                                                        | -2.61 | 0.43 | 0.00 |
| A_52_P566718  | NM_019811 | Acss2   | 60525  | acyl-CoA synthetase short-chain family member 2                                                 | -2.43 | 0.43 | 0.00 |

|              |                     |        |                                                                                  |       |      |      |
|--------------|---------------------|--------|----------------------------------------------------------------------------------|-------|------|------|
| A_51_P130101 | NM_001077: Fcgr2b   | 14130  | Fc receptor, IgG, low affinity IIb                                               | -1.43 | 0.43 | 0.24 |
| A_52_P677147 | NM_013768 Prmt5     | 27374  | protein arginine N-methyltransferase 5                                           | -2.91 | 0.43 | 0.00 |
| A_51_P222475 | NM_053252 Ehbp1l1   | 114601 | EH domain binding protein 1-like 1                                               | -2.56 | 0.43 | 0.00 |
| A_52_P539434 | NM_029999 Lbh       | 77889  | limb-bud and heart                                                               | -2.12 | 0.43 | 0.01 |
| A_51_P205779 | NM_009690 Cd5l      | 11801  | CD5 antigen-like                                                                 | -2.48 | 0.43 | 0.00 |
| A_51_P406638 | NM_011258 Rfc1      | 19687  | replication factor C (activator 1) 1                                             | -2.84 | 0.43 | 0.00 |
| A_52_P300863 | NM_178791 E130203B1 | 320736 | RIKEN cDNA E130203B14 gene                                                       | -2.85 | 0.43 | 0.00 |
| A_51_P216108 | NM_146244 Rps6kl1   | 238323 | ribosomal protein S6 kinase-like 1                                               | -2.42 | 0.43 | 0.00 |
| A_51_P257258 | NM_007757 Cpox      | 12892  | coproporphyrinogen oxidase                                                       | -2.26 | 0.43 | 0.01 |
| A_51_P138502 | BC002262 Ttc28      | 209683 | tetratricopeptide repeat domain 28                                               | -2.73 | 0.43 | 0.00 |
| A_51_P363588 | NM_012048 Polk      | 27015  | polymerase (DNA directed), kappa                                                 | -2.77 | 0.43 | 0.00 |
| A_52_P293724 | NM_025510 2310004I2 | 66358  | RIKEN cDNA 2310004I24 gene                                                       | -2.95 | 0.43 | 0.00 |
| A_52_P372062 | NM_133695 NA        | NA     | NA                                                                               | -3.01 | 0.43 | 0.00 |
| A_51_P140460 | NM_029394 Snx24     | 69226  | sorting nexin 24                                                                 | -2.52 | 0.43 | 0.00 |
| A_51_P476492 | XM_893473 NA        | NA     | NA                                                                               | -2.02 | 0.43 | 0.02 |
| A_51_P364432 | NM_024256 B3gat3    | 72727  | beta-1,3-glucuronyltransferase 3<br>(glucuronosyltransferase I)                  | -3.12 | 0.43 | 0.00 |
| A_51_P382928 | NM_145529 Cstf3     | 228410 | cleavage stimulation factor, 3' pre-RNA, subunit 3                               | -2.25 | 0.43 | 0.01 |
| A_51_P261585 | NM_153796 Peo1      | 226153 | progressive external ophthalmoplegia 1 (human)                                   | -2.69 | 0.43 | 0.00 |
| A_51_P313855 | NM_183408 Pde4a     | 18577  | phosphodiesterase 4A, cAMP specific                                              | -3.01 | 0.43 | 0.00 |
| A_52_P258606 | AK081980 Prdx6      | 11758  | peroxiredoxin 6                                                                  | -2.50 | 0.43 | 0.00 |
| A_51_P521010 | NM_016854 Ppp1r3c   | 53412  | protein phosphatase 1, regulatory (inhibitor) subunit 3C                         | -1.61 | 0.43 | 0.13 |
| A_52_P370476 | BC043039 Msl1       | 74026  | male-specific lethal 1 homolog (Drosophila)                                      | -2.61 | 0.43 | 0.00 |
| A_52_P632567 | NM_172860 Cbfa2t2   | 12396  | core-binding factor, runt domain, alpha subunit 2,<br>translocated to, 2 (human) | -3.05 | 0.43 | 0.00 |
| A_52_P588051 | XM_977462 Znf512b   | 269401 | zinc finger protein 512B                                                         | -2.84 | 0.43 | 0.00 |
| A_51_P259358 | NM_181417 Csrp2bp   | 228714 | cysteine and glycine-rich protein 2 binding protein                              | -3.12 | 0.43 | 0.00 |
| A_52_P62223  | NM_009163 Sgpl1     | 20397  | sphingosine phosphate lyase 1                                                    | -3.21 | 0.43 | 0.00 |
| A_51_P289353 | NM_032544 Gtpbp3    | 70359  | GTP binding protein 3                                                            | -2.05 | 0.43 | 0.02 |
| A_51_P505156 | NM_138306 Dgkz      | 104418 | diacylglycerol kinase zeta                                                       | -3.03 | 0.43 | 0.00 |
| A_51_P106527 | NM_026633 Fam195a   | 68241  | family with sequence similarity 195, member A                                    | -2.54 | 0.43 | 0.00 |

|              |           |            |        |                                                                                                 |       |      |      |
|--------------|-----------|------------|--------|-------------------------------------------------------------------------------------------------|-------|------|------|
| A_52_P285992 | NM_023854 | Arfgap2    | 77038  | ADP-ribosylation factor GTPase activating protein 2                                             | -2.69 | 0.43 | 0.00 |
| A_52_P82532  | NM_009746 | Bcl7c      | 12055  | B-cell CLL/lymphoma 7C                                                                          | -2.12 | 0.43 | 0.01 |
| A_51_P472630 | BC028539  | H2afv      | 77605  | H2A histone family, member V                                                                    | -2.81 | 0.43 | 0.00 |
| A_52_P319199 | NM_145154 | Angptl6    | 70726  | angiopoietin-like 6                                                                             | -2.39 | 0.43 | 0.01 |
| A_52_P384310 | NM_177343 | Camk1d     | 227541 | calcium/calmodulin-dependent protein kinase ID                                                  | -2.49 | 0.43 | 0.00 |
| A_51_P104727 | NM_153078 | Ehbp1      | 216565 | EH domain binding protein 1                                                                     | -2.60 | 0.43 | 0.00 |
| A_51_P325124 | NM_177583 | Aph1b      | 208117 | anterior pharynx defective 1b homolog (C. elegans)                                              | -2.61 | 0.43 | 0.00 |
| A_51_P283083 | NM_028840 | Armc1      | 74252  | armadillo repeat containing 1                                                                   | -2.38 | 0.43 | 0.01 |
| A_51_P106538 | NM_030127 | Htra3      | 78558  | HtrA serine peptidase 3                                                                         | -1.83 | 0.43 | 0.05 |
| A_51_P406281 | NM_026741 | Zfp579     | 68490  | zinc finger protein 579                                                                         | -2.61 | 0.43 | 0.00 |
| A_51_P238565 | NM_026212 | Agpat2     | 67512  | 1-acylglycerol-3-phosphate O-acyltransferase 2<br>(lysophosphatidic acid acyltransferase, beta) | -2.60 | 0.43 | 0.00 |
| A_51_P494825 | BC082308  | Mfhas1     | 52065  | malignant fibrous histiocytoma amplified sequence 1                                             | -2.89 | 0.43 | 0.00 |
| A_51_P488399 | NM_019811 | Acss2      | 60525  | acyl-CoA synthetase short-chain family member 2                                                 | -2.23 | 0.43 | 0.01 |
| A_52_P277322 | AK084607  | 2310008H09 | 66356  | RIKEN cDNA 2310008H09 gene                                                                      | -2.34 | 0.43 | 0.01 |
| A_52_P128964 | NM_029342 | Nhej1      | 75570  | nonhomologous end-joining factor 1                                                              | -2.81 | 0.43 | 0.00 |
| A_51_P130095 | NM_001077 | Fcgr2b     | 14130  | Fc receptor, IgG, low affinity IIb                                                              | -1.69 | 0.43 | 0.09 |
| A_52_P301035 | NM_173445 | Rccd1      | 269955 | RCC1 domain containing 1                                                                        | -2.88 | 0.43 | 0.00 |
| A_51_P403799 | NM_021287 | Spnb3      | 20743  | spectrin beta 3                                                                                 | -2.50 | 0.43 | 0.00 |
| A_52_P674803 | NM_015801 | Pnpla6     | 50767  | patatin-like phospholipase domain containing 6                                                  | -2.85 | 0.43 | 0.00 |
| A_52_P543869 | NM_029031 | Shpk       | 74637  | sedoheptulokinase                                                                               | -1.51 | 0.43 | 0.18 |
| A_52_P174872 | AK028820  | C030015A1  | 177418 | RIKEN cDNA C030015A19 gene                                                                      | -2.49 | 0.43 | 0.00 |
| A_51_P130332 | NM_028306 | Hspa12b    | 72630  | heat shock protein 12B                                                                          | -2.57 | 0.43 | 0.00 |
| A_52_P640694 | AK122226  | Rims3      | 242662 | regulating synaptic membrane exocytosis 3                                                       | -2.52 | 0.43 | 0.00 |
| A_51_P331831 | NM_001042 | Hvcn1      | 74096  | hydrogen voltage-gated channel 1                                                                | -3.01 | 0.42 | 0.00 |
| A_52_P134075 | NM_024289 | Osbpl5     | 79196  | oxysterol binding protein-like 5                                                                | -2.62 | 0.42 | 0.00 |
| A_51_P137236 | NM_019498 | Olfm1      | 56177  | olfactomedin 1                                                                                  | -2.61 | 0.42 | 0.00 |
| A_51_P283344 | NM_025956 | 1700011H14 | 167082 | RIKEN cDNA 1700011H14 gene                                                                      | -1.47 | 0.42 | 0.21 |
| A_51_P431018 | NM_019414 | Selenbp2   | 20342  | selenium binding protein 2                                                                      | -1.23 | 0.42 | 0.55 |
| A_51_P196663 | XM_898059 | NA         | NA     | NA                                                                                              | -1.80 | 0.42 | 0.05 |

|              |           |           |        |                                                    |       |      |      |
|--------------|-----------|-----------|--------|----------------------------------------------------|-------|------|------|
| A_52_P201972 | AK037342  | Zfp148    | 22661  | zinc finger protein 148                            | -2.12 | 0.42 | 0.01 |
| A_51_P157677 | NM_016798 | Pdlim3    | 53318  | PDZ and LIM domain 3                               | -1.14 | 0.42 | 0.82 |
| A_51_P344046 | NM_134029 | Nt5m      | 103850 | 5',3'-nucleotidase, mitochondrial                  | -2.99 | 0.42 | 0.00 |
| A_51_P133582 | NM_007625 | Cbx4      | 12418  | chromobox homolog 4 (Drosophila Pc class)          | -2.71 | 0.42 | 0.00 |
| A_51_P292447 | NM_146219 | Klhl36    | 234796 | kelch-like 36 (Drosophila)                         | -2.68 | 0.42 | 0.00 |
| A_52_P281172 | BC056501  | Slc45a4   | 106068 | solute carrier family 45, member 4                 | -2.72 | 0.42 | 0.00 |
| A_52_P352277 | NM_016769 | Smad3     | 17127  | MAD homolog 3 (Drosophila)                         | -2.28 | 0.42 | 0.01 |
| A_51_P273468 | AK018450  | 8430429K0 | 71523  | RIKEN cDNA 8430429K09 gene                         | -1.51 | 0.42 | 0.18 |
| A_51_P483908 | NM_007835 | Dctn1     | 13191  | dynactin 1                                         | -2.66 | 0.42 | 0.00 |
| A_51_P450752 | BC098210  | NA        | NA     | NA                                                 | -2.57 | 0.42 | 0.00 |
| A_51_P518001 | NM_145365 | Creb3l3   | 208677 | cAMP responsive element binding protein 3-like 3   | -2.35 | 0.42 | 0.01 |
| A_52_P628369 | NM_173427 | Klhd7a    | 242721 | kelch domain containing 7A                         | -2.43 | 0.42 | 0.00 |
| A_52_P469502 | NM_028176 | Cda       | 72269  | cytidine deaminase                                 | -1.57 | 0.42 | 0.15 |
| A_51_P283473 | NM_026271 | Fibin     | 67606  | fin bud initiation factor homolog (zebrafish)      | -2.32 | 0.42 | 0.01 |
| A_52_P228437 | AK088871  | Mbnl1     | 56758  | muscleblind-like 1 (Drosophila)                    | -1.09 | 0.42 | 0.97 |
| A_52_P595619 | NM_197989 | Fam58b    | 69109  | family with sequence similarity 58, member B       | -2.05 | 0.42 | 0.02 |
| A_51_P386899 | NM_145447 | Mfsd7c    | 217721 | major facilitator superfamily domain containing 7C | -2.44 | 0.42 | 0.00 |
| A_51_P488646 | NM_009755 | Bmp1      | 12153  | bone morphogenetic protein 1                       | -2.42 | 0.42 | 0.00 |
| A_52_P602987 | BC096586  | Prlr      | 19116  | prolactin receptor                                 | -2.02 | 0.42 | 0.02 |
| A_51_P303231 | M63659    | Gna12     | 14673  | guanine nucleotide binding protein, alpha 12       | -1.84 | 0.42 | 0.04 |
| A_51_P221008 | BC070451  | Gramd1b   | 235283 | GRAM domain containing 1B                          | -2.65 | 0.42 | 0.00 |
| A_52_P536481 | NM_020619 | Mogs      | 57377  | mannosyl-oligosaccharide glucosidase               | -2.62 | 0.42 | 0.00 |
| A_52_P259174 | XM_001005 | NA        | NA     | NA                                                 | -1.46 | 0.42 | 0.21 |
| A_51_P215097 | NM_078477 | Klf16     | 118445 | Kruppel-like factor 16                             | -2.72 | 0.42 | 0.00 |
| A_51_P107433 | NM_053162 | Mrpl34    | 94065  | mitochondrial ribosomal protein L34                | -3.37 | 0.42 | 0.00 |
| A_51_P337598 | XM_485677 | NA        | NA     | NA                                                 | -2.51 | 0.42 | 0.00 |
| A_51_P159415 | NM_011378 | Sin3a     | 20466  | transcriptional regulator, SIN3A (yeast)           | -3.25 | 0.42 | 0.00 |
| A_52_P658073 | AK045575  | Tef       | 21685  | thyrotroph embryonic factor                        | -2.63 | 0.42 | 0.00 |
| A_51_P324161 | XM_132817 | NA        | NA     | NA                                                 | -2.11 | 0.42 | 0.01 |
| A_52_P318040 | NA        | NA        | NA     | NA                                                 | -2.39 | 0.42 | 0.01 |
| A_52_P817975 | BY711602  | NA        | NA     | NA                                                 | -2.69 | 0.42 | 0.00 |

|               |           |           |        |                                                                                                   |       |      |      |
|---------------|-----------|-----------|--------|---------------------------------------------------------------------------------------------------|-------|------|------|
| A_52_P460703  | NM_138956 | Rassf3    | 192678 | Ras association (RalGDS/AF-6) domain family member 3                                              | -2.61 | 0.42 | 0.00 |
| A_52_P860487  | NA        | NA        | NA     | NA                                                                                                | -2.09 | 0.42 | 0.02 |
| A_52_P86003   | NM_001037 | Tomm40l   | 641376 | translocase of outer mitochondrial membrane 40 homolog-like (yeast)                               | -2.56 | 0.42 | 0.00 |
| A_51_P327232  | NM_020517 | Lenep     | 57275  | lens epithelial protein                                                                           | -2.51 | 0.42 | 0.00 |
| A_51_P257885  | NM_175217 | Mmd2      | 75104  | monocyte to macrophage differentiation-associated 2                                               | -1.84 | 0.42 | 0.04 |
| A_52_P299846  | NM_021506 | Sh3rf1    | 59009  | SH3 domain containing ring finger 1                                                               | -2.68 | 0.42 | 0.00 |
| A_51_P441807  | NM_183137 | 241000210 | 78777  | RIKEN cDNA 2410002101 gene                                                                        | -2.76 | 0.42 | 0.00 |
| A_51_P141970  | NM_023431 | Mum1      | 68114  | melanoma associated antigen (mutated) 1                                                           | -2.78 | 0.42 | 0.00 |
| A_51_P520585  | NM_026967 | Rhebl1    | 69159  | Ras homolog enriched in brain like 1                                                              | -2.69 | 0.42 | 0.00 |
| A_51_P272448  | NM_183285 | Kctd2     | 70382  | potassium channel tetramerisation domain containing 2                                             | -2.03 | 0.42 | 0.02 |
| A_51_P464992  | NM_181452 | Mtvr2     | 17826  | mammary tumor virus receptor 2                                                                    | -2.57 | 0.42 | 0.00 |
| A_51_P445574  | NM_178053 | Nags      | 217214 | N-acetylglutamate synthase                                                                        | -2.88 | 0.42 | 0.00 |
| A_52_P198239  | NM_001033 | Ube2u     | 381534 | ubiquitin-conjugating enzyme E2U (putative) required for meiotic nuclear division 5 homolog B (S. | -1.85 | 0.42 | 0.04 |
| A_51_P244969  | NM_025346 | Rmnd5b    | 66089  | cerevisiae)                                                                                       | -2.83 | 0.42 | 0.00 |
| A_51_P123242  | AK159194  | Hmha1     | 70719  | histocompatibility (minor) HA-1                                                                   | -3.01 | 0.42 | 0.00 |
| A_52_P222624  | NM_024441 | Hspb2     | 69253  | heat shock protein 2                                                                              | -2.58 | 0.42 | 0.00 |
| A_52_P449871  | NM_031166 | Id4       | 15904  | inhibitor of DNA binding 4                                                                        | -2.35 | 0.42 | 0.01 |
| A_51_P370874  | NM_001039 | Pkig      | 18769  | protein kinase inhibitor, gamma                                                                   | -2.45 | 0.42 | 0.00 |
| A_51_P329291  | NM_030206 | Cygb      | 114886 | cytoglobin                                                                                        | -2.80 | 0.42 | 0.00 |
| A_51_P477418  | AK003826  | Nfic      | 18029  | nuclear factor I/C                                                                                | -2.72 | 0.42 | 0.00 |
| A_52_P40504   | AK162948  | 2900052L1 | 76835  | RIKEN cDNA 2900052L18 gene                                                                        | -2.99 | 0.42 | 0.00 |
| A_51_P350033  | NM_023624 | Lrat      | 79235  | lecithin-retinol acyltransferase (phosphatidylcholine-retinol-O-acyltransferase)                  | -1.93 | 0.42 | 0.03 |
| A_52_P236426  | NM_026058 | Lass4     | 67260  | LAG1 homolog, ceramide synthase 4                                                                 | -3.31 | 0.42 | 0.00 |
| A_52_P416913  | NM_009471 | Umps      | 22247  | uridine monophosphate synthetase                                                                  | -2.79 | 0.42 | 0.00 |
| A_52_P486260  | NM_054077 | Prelp     | 116847 | proline arginine-rich end leucine-rich repeat                                                     | -2.61 | 0.42 | 0.00 |
| A_52_P404461  | NM_177601 | Tmem60    | 212090 | transmembrane protein 60                                                                          | -2.63 | 0.42 | 0.00 |
| A_51_P277199  | NM_153528 | Gramd1c   | 207798 | GRAM domain containing 1C                                                                         | -2.82 | 0.42 | 0.00 |
| A_52_P1092823 | AK133937  | Irx1      | 16371  | Iroquois related homeobox 1 (Drosophila)                                                          | -2.28 | 0.42 | 0.01 |

|              |           |           |        |                                                                              |       |      |      |
|--------------|-----------|-----------|--------|------------------------------------------------------------------------------|-------|------|------|
| A_52_P486322 | NM_019757 | Fzr1      | 56371  | fizzy/cell division cycle 20 related 1 (Drosophila)                          | -3.39 | 0.42 | 0.00 |
| A_51_P378173 | NM_026787 | 1110012L1 | 68618  | RIKEN cDNA 1110012L19 gene                                                   | -2.65 | 0.42 | 0.00 |
| A_51_P145415 | NM_145130 | Lpcat3    | 14792  | lysophosphatidylcholine acyltransferase 3                                    | -2.05 | 0.42 | 0.02 |
| A_51_P485203 | NM_147201 | Nrbp1     | 192292 | nuclear receptor binding protein 1                                           | -3.36 | 0.42 | 0.00 |
| A_51_P189442 | NM_011996 | Adh4      | 26876  | alcohol dehydrogenase 4 (class II), pi polypeptide                           | -2.60 | 0.42 | 0.00 |
| A_52_P743305 | AK137240  | Pabpn1    | 54196  | poly(A) binding protein, nuclear 1                                           | -1.92 | 0.42 | 0.03 |
| A_51_P183703 | NA        | NA        | NA     | NA                                                                           | -2.14 | 0.42 | 0.01 |
| A_52_P648304 | NM_201406 | Pigs      | 276846 | phosphatidylinositol glycan anchor biosynthesis, class S                     | -2.28 | 0.42 | 0.01 |
| A_52_P578768 | NM_178746 | Slc38a9   | 268706 | solute carrier family 38, member 9                                           | -2.83 | 0.42 | 0.00 |
| A_51_P224983 | NM_012000 | Cln8      | 26889  | ceroid-lipofuscinosis, neuronal 8                                            | -2.54 | 0.42 | 0.00 |
| A_51_P417861 | NM_146231 | Zfp825    | 235956 | zinc finger protein 825                                                      | -2.66 | 0.42 | 0.00 |
| A_52_P322301 | NM_176838 | Esrp2     | 77411  | epithelial splicing regulatory protein 2                                     | -2.91 | 0.42 | 0.00 |
| A_51_P281582 | NM_029985 | Lrrc42    | 77809  | leucine rich repeat containing 42                                            | -2.25 | 0.42 | 0.01 |
| A_52_P144839 | NM_018757 | Nme6      | 54369  | non-metastatic cells 6, protein expressed in (nucleoside-diphosphate kinase) | -1.96 | 0.42 | 0.03 |
| A_52_P613418 | NM_027141 | Spsb3     | 79043  | splA/ryanodine receptor domain and SOCS box containing 3                     | -2.39 | 0.42 | 0.01 |
| A_51_P251508 | BC050010  | Lemd2     | 224640 | LEM domain containing 2                                                      | -2.64 | 0.42 | 0.00 |
| A_51_P300456 | AK122223  | Pxdn      | 69675  | peroxidasin homolog (Drosophila)                                             | -1.88 | 0.42 | 0.04 |
| A_51_P257558 | NM_001033 | Ddx31     | 227674 | DEAD/H (Asp-Glu-Ala-Asp/His) box polypeptide 31                              | -2.75 | 0.42 | 0.00 |
| A_52_P257426 | NM_133191 | Eps8l2    | 98845  | EPS8-like 2                                                                  | -2.80 | 0.42 | 0.00 |
| A_52_P609770 | AK050570  | Irf3      | 54131  | interferon regulatory factor 3                                               | -1.74 | 0.42 | 0.07 |
| A_52_P148678 | AK169695  | Plcg1     | 18803  | phospholipase C, gamma 1                                                     | -2.73 | 0.42 | 0.00 |
| A_51_P460774 | NM_177009 | Smyd4     | 319822 | SET and MYND domain containing 4                                             | -3.05 | 0.42 | 0.00 |
| A_52_P381953 | NM_178757 | Irf2bp1   | 272359 | interferon regulatory factor 2 binding protein 1                             | -3.28 | 0.42 | 0.00 |
| A_51_P338674 | NM_025605 | 2400001E0 | 66508  | RIKEN cDNA 2400001E08 gene                                                   | -3.14 | 0.42 | 0.00 |
| A_51_P138895 | NM_001033 | Ccdc102a  | 234582 | coiled-coil domain containing 102A                                           | -2.74 | 0.42 | 0.00 |
| A_52_P186362 | NA        | NA        | NA     | NA                                                                           | -1.95 | 0.42 | 0.03 |
| A_52_P633379 | NM_054057 | Prosc     | 114863 | proline synthetase co-transcribed                                            | -2.41 | 0.42 | 0.00 |
| A_51_P291713 | NM_134094 | Ncald     | 52589  | neurocalcin delta                                                            | -2.98 | 0.42 | 0.00 |
| A_52_P312473 | AK136375  | 9230114K1 | 414108 | RIKEN cDNA 9230114K14 gene                                                   | -3.35 | 0.42 | 0.00 |

|              |           |           |        |                                                                                                                                                |       |      |      |
|--------------|-----------|-----------|--------|------------------------------------------------------------------------------------------------------------------------------------------------|-------|------|------|
| A_51_P295286 | AK006906  | 1700066M  | 73467  | RIKEN cDNA 1700066M21 gene                                                                                                                     | -2.59 | 0.42 | 0.00 |
| A_52_P395528 | NA        | NA        | NA     | NA                                                                                                                                             | -2.07 | 0.42 | 0.02 |
| A_51_P493720 | NM_009360 | Tfam      | 21780  | transcription factor A, mitochondrial                                                                                                          | -3.11 | 0.42 | 0.00 |
| A_52_P64001  | NM_133345 | Ing4      | 28019  | inhibitor of growth family, member 4                                                                                                           | -2.88 | 0.42 | 0.00 |
| A_51_P258322 | NM_178898 | AI894139  | 101197 | expressed sequence AI894139                                                                                                                    | -3.24 | 0.42 | 0.00 |
| A_52_P875556 | AK083287  | NA        | NA     | NA                                                                                                                                             | -2.69 | 0.42 | 0.00 |
| A_52_P674386 | AK087243  | Tmcc1     | 330401 | transmembrane and coiled coil domains 1                                                                                                        | -1.99 | 0.42 | 0.03 |
| A_51_P141610 | BC052789  | Cables2   | 252966 | CDK5 and Abl enzyme substrate 2                                                                                                                | -2.99 | 0.41 | 0.00 |
| A_51_P223058 | BC064474  | Cgn       | 70737  | cingulin                                                                                                                                       | -2.82 | 0.41 | 0.00 |
| A_51_P313779 | NM_198248 | Zbtb40    | 230848 | zinc finger and BTB domain containing 40                                                                                                       | -2.47 | 0.41 | 0.00 |
| A_52_P657800 | NA        | NA        | NA     | NA                                                                                                                                             | -3.12 | 0.41 | 0.00 |
| A_51_P175736 | NM_026553 | Yif1a     | 68090  | Yip1 interacting factor homolog A ( <i>S. cerevisiae</i> )                                                                                     | -2.51 | 0.41 | 0.00 |
| A_51_P383755 | NA        | NA        | NA     | NA                                                                                                                                             | -2.83 | 0.41 | 0.00 |
| A_52_P313322 | NM_029793 | Golga1    | 76899  | golgi autoantigen, golgin subfamily a, 1                                                                                                       | -2.30 | 0.41 | 0.01 |
| A_52_P529360 | NM_001003 | Rab11fip5 | 52055  | RAB11 family interacting protein 5 (class I)                                                                                                   | -2.38 | 0.41 | 0.01 |
| A_51_P321734 | NM_022884 | Bhmt2     | 64918  | betaine-homocysteine methyltransferase 2                                                                                                       | -2.68 | 0.41 | 0.00 |
| A_52_P215539 | NM_176828 | C030006K1 | 223665 | RIKEN cDNA C030006K11 gene                                                                                                                     | -2.83 | 0.41 | 0.00 |
| A_51_P173445 | NM_001033 | Slc30a10  | 226781 | solute carrier family 30, member 10                                                                                                            | -2.12 | 0.41 | 0.01 |
| A_51_P169867 | NM_011894 | Sh3bp5    | 24056  | SH3-domain binding protein 5 (BTK-associated)                                                                                                  | -2.56 | 0.41 | 0.00 |
| A_51_P399305 | NM_013869 | Tnfrsf19  | 29820  | tumor necrosis factor receptor superfamily, member 19                                                                                          | -2.19 | 0.41 | 0.01 |
| A_52_P625296 | BC053060  | Vav2      | 22325  | vav 2 oncogene                                                                                                                                 | -2.73 | 0.41 | 0.00 |
| A_51_P116039 | NM_008256 | Hmgcs2    | 15360  | 3-hydroxy-3-methylglutaryl-Coenzyme A synthase 2                                                                                               | -1.71 | 0.41 | 0.07 |
| A_52_P205789 | NM_175352 | Unc119b   | 106840 | unc-119 homolog B ( <i>C. elegans</i> )                                                                                                        | -2.99 | 0.41 | 0.00 |
| A_51_P141521 | NM_172965 | Sap130    | 269003 | Sin3A associated protein                                                                                                                       | -2.96 | 0.41 | 0.00 |
| A_52_P655532 | NM_018817 | Smarca1   | 54380  | SWI/SNF related matrix associated, actin dependent regulator of chromatin, subfamily a-like 1<br>platelet derived growth factor receptor, beta | -3.46 | 0.41 | 0.00 |
| A_51_P150964 | NM_008809 | Pdgfrb    | 18596  | polypeptide                                                                                                                                    | -2.57 | 0.41 | 0.00 |
| A_51_P134776 | NM_023173 | Dusp12    | 80915  | dual specificity phosphatase 12                                                                                                                | -1.95 | 0.41 | 0.03 |
| A_51_P161354 | NM_144907 | Sesn2     | 230784 | sestrin 2                                                                                                                                      | -2.64 | 0.41 | 0.00 |
| A_51_P390377 | NM_144814 | Rcor3     | 214742 | REST corepressor 3                                                                                                                             | -1.54 | 0.41 | 0.16 |

|              |           |                 |                                                            |       |      |      |
|--------------|-----------|-----------------|------------------------------------------------------------|-------|------|------|
| A_52_P502332 | AK033222  | 2810055G277994  | RIKEN cDNA 2810055G20 gene                                 | -2.75 | 0.41 | 0.00 |
| A_52_P441974 | NM_145920 | Evc2 68525      | Ellis van Creveld syndrome 2 homolog (human)               | -2.10 | 0.41 | 0.01 |
| A_51_P214985 | NM_145492 | Zfp521 225207   | zinc finger protein 521                                    | -2.39 | 0.41 | 0.01 |
| A_51_P168395 | NM_030188 | Ttc30a1 78802   | tetratricopeptide repeat domain 30A1                       | -2.55 | 0.41 | 0.00 |
| A_51_P340805 | NM_001039 | Zkscan4 544922  | zinc finger with KRAB and SCAN domains 4                   | -2.83 | 0.41 | 0.00 |
| A_51_P402775 | AK090134  | Anapc1 17222    | anaphase promoting complex subunit 1                       | -2.35 | 0.41 | 0.01 |
| A_51_P394676 | BC040217  | Mef2d 17261     | myocyte enhancer factor 2D                                 | -3.07 | 0.41 | 0.00 |
| A_51_P152773 | NM_146201 | Zfp553 233887   | zinc finger protein 553                                    | -2.55 | 0.41 | 0.00 |
| A_52_P590665 | NM_145597 | Tmem161a 234371 | transmembrane protein 161A                                 | -2.80 | 0.41 | 0.00 |
| A_52_P511269 | BC025208  | Mlec 109154     | malectin                                                   | -1.78 | 0.41 | 0.06 |
| A_52_P69756  | NM_178051 | Mterfd2 69821   | MTERF domain containing 2                                  | -3.16 | 0.41 | 0.00 |
| A_51_P208862 | NM_178909 | Wdr92 103784    | WD repeat domain 92                                        | -2.54 | 0.41 | 0.00 |
| A_52_P480544 | NM_145390 | Tnpo2 212999    | transportin 2 (importin 3, karyopherin beta 2b)            | -2.52 | 0.41 | 0.00 |
| A_52_P324825 | NM_175414 | Tspan9 109246   | tetraspanin 9                                              | -3.10 | 0.41 | 0.00 |
| A_52_P89273  | AK051905  | Cbx8 30951      | chromobox homolog 8 (Drosophila Pc class)                  | -2.42 | 0.41 | 0.00 |
| A_51_P477833 | NM_001033 | Klhl21 242785   | kelch-like 21 (Drosophila)                                 | -1.99 | 0.41 | 0.03 |
| A_52_P244381 | AK013849  | 2900093K2 68037 | RIKEN cDNA 2900093K20 gene                                 | -3.12 | 0.41 | 0.00 |
| A_51_P431823 | NM_027521 | Hmha1 70719     | histocompatibility (minor) HA-1                            | -2.23 | 0.41 | 0.01 |
| A_51_P493256 | NM_001042 | Pex10 668173    | peroxisomal biogenesis factor 10                           | -2.85 | 0.41 | 0.00 |
| A_52_P151278 | NM_146164 | Lrch4 231798    | domain containing 4                                        | -3.20 | 0.41 | 0.00 |
| A_51_P147373 | NM_133803 | Dpp3 75221      | dipeptidylpeptidase 3                                      | -2.91 | 0.41 | 0.00 |
| A_52_P542958 | NM_207207 | Mrps26 99045    | mitochondrial ribosomal protein S26                        | -2.83 | 0.41 | 0.00 |
| A_51_P105991 | NM_011538 | Tbx6 21389      | T-box 6                                                    | -2.49 | 0.41 | 0.00 |
| A_51_P386189 | NM_016788 | Tnk2 51789      | tyrosine kinase, non-receptor, 2                           | -2.78 | 0.41 | 0.00 |
| A_51_P172502 | NM_001012 | Cxcl12 20315    | chemokine (C-X-C motif) ligand 12                          | -2.90 | 0.41 | 0.00 |
| A_52_P496532 | NA        | NA              | NA                                                         | -2.47 | 0.41 | 0.00 |
| A_51_P502964 | NM_144794 | Tmem63a 208795  | transmembrane protein 63a                                  | -2.89 | 0.41 | 0.00 |
| A_52_P564983 | XM_204104 | Fam131c 277743  | family with sequence similarity 131, member C              | -2.96 | 0.41 | 0.00 |
| A_51_P271887 | NM_016678 | Reck 53614      | reversion-inducing-cysteine-rich protein with kazal motifs | -2.16 | 0.41 | 0.01 |
| A_51_P224099 | NM_172560 | Cntrob 216846   | centrobin, centrosomal BRCA2 interacting protein           | -1.95 | 0.41 | 0.03 |
| A_52_P193181 | NM_025538 | Alkbh7 66400    | alkB, alkylation repair homolog 7 (E. coli)                | -1.44 | 0.41 | 0.22 |



|               |           |           |        |                                                                                                   |       |      |      |
|---------------|-----------|-----------|--------|---------------------------------------------------------------------------------------------------|-------|------|------|
| A_51_P483081  | AK165218  | Lpin2     | 64898  | lipin 2                                                                                           | -2.28 | 0.41 | 0.01 |
| A_52_P59228   | NM_178375 | Zswim3    | 67538  | zinc finger, SWIM domain containing 3                                                             | -3.11 | 0.41 | 0.00 |
| A_52_P664800  | NM_178239 | NA        | NA     | NA                                                                                                | -3.02 | 0.41 | 0.00 |
| A_51_P239236  | NA        | NA        | NA     | NA                                                                                                | -1.14 | 0.41 | 0.82 |
| A_51_P504214  | NM_018832 | Magix     | 54634  | MAGI family member, X-linked                                                                      | -3.19 | 0.41 | 0.00 |
| A_52_P384574  | NM_133774 | Stard4    | 170459 | StAR-related lipid transfer (START) domain containing 4                                           | -1.59 | 0.41 | 0.14 |
| A_52_P602771  | NM_009274 | Srpk2     | 20817  | serine/arginine-rich protein specific kinase 2                                                    | -2.34 | 0.41 | 0.01 |
| A_52_P566406  | NM_009531 | Xpc       | 22591  | xeroderma pigmentosum, complementation group C<br>pleckstrin homology domain containing, family A | -3.24 | 0.41 | 0.00 |
| A_52_P587054  | NM_144920 | Plekha5   | 109135 | member 5                                                                                          | -2.09 | 0.41 | 0.02 |
| A_52_P566605  | NM_010476 | Hsd17b7   | 15490  | hydroxysteroid (17-beta) dehydrogenase 7                                                          | -2.32 | 0.41 | 0.01 |
| A_52_P427564  | NM_028662 | Slc35b2   | 73836  | solute carrier family 35, member B2                                                               | -3.21 | 0.41 | 0.00 |
| A_51_P104891  | NM_027652 | D5Wsu178  | 28042  | DNA segment, Chr 5, Wayne State University 178,<br>expressed                                      | -1.20 | 0.41 | 0.61 |
| A_51_P304757  | NM_020590 | Gabarapl1 | 57436  | gamma-aminobutyric acid (GABA) A receptor-associated<br>protein-like 1                            | -2.81 | 0.41 | 0.00 |
| A_51_P449450  | NM_001024 | Dcun1d2   | 102323 | DCN1, defective in cullin neddylation 1, domain<br>containing 2 ( <i>S. cerevisiae</i> )          | -2.85 | 0.41 | 0.00 |
| A_52_P481279  | NM_001033 | Gm1060    | 381738 | predicted gene 1060                                                                               | -1.93 | 0.41 | 0.03 |
| A_51_P400375  | NM_021446 | 0610007P1 | 58520  | RIKEN cDNA 0610007P14 gene                                                                        | -2.71 | 0.41 | 0.00 |
| A_51_P289697  | NM_011849 | Nek4      | 23955  | NIMA (never in mitosis gene a)-related expressed kinase<br>4                                      | -2.68 | 0.41 | 0.00 |
| A_52_P355480  | NA        | NA        | NA     | NA                                                                                                | -2.78 | 0.41 | 0.00 |
| A_51_P199098  | NM_025838 | Tmem107   | 66910  | transmembrane protein 107                                                                         | -2.97 | 0.41 | 0.00 |
| A_51_P149373  | NM_028149 | Fbxl20    | 72194  | F-box and leucine-rich repeat protein 20                                                          | -2.95 | 0.41 | 0.00 |
| A_51_P346923  | NM_019782 | Lepre1    | 56401  | leprecan 1                                                                                        | -2.48 | 0.41 | 0.00 |
| A_52_P166770  | NM_053179 | Nans      | 94181  | N-acetylneuraminic acid synthase (sialic acid synthase)                                           | -2.01 | 0.41 | 0.02 |
| A_51_P456486  | AK037870  | NA        | NA     | NA                                                                                                | -3.08 | 0.41 | 0.00 |
| A_52_P75985   | NM_025808 | Lztr1     | 66863  | leucine-zipper-like transcriptional regulator, 1                                                  | -2.74 | 0.41 | 0.00 |
| A_51_P464911  | NM_029619 | Msrb2     | 76467  | methionine sulfoxide reductase B2                                                                 | -2.99 | 0.41 | 0.00 |
| A_52_P1124330 | AK082375  | NA        | NA     | NA                                                                                                | -2.17 | 0.41 | 0.01 |

|               |           |           |        |                                                                       |       |      |      |
|---------------|-----------|-----------|--------|-----------------------------------------------------------------------|-------|------|------|
| A_52_P232470  | NM_001009 | Smcr7     | 237781 | Smith-Magenis syndrome chromosome region, candidate 7 homolog (human) | -3.01 | 0.41 | 0.00 |
| A_51_P509229  | NM_144925 | Tnrc6a    | 233833 | trinucleotide repeat containing 6a                                    | -3.05 | 0.41 | 0.00 |
| A_51_P346803  | NM_017380 | 9-Sep     | 53860  | septin 9                                                              | -1.85 | 0.41 | 0.04 |
| A_52_P676198  | NM_025912 | 201001112 | 67017  | RIKEN cDNA 2010011120 gene                                            | -2.67 | 0.41 | 0.00 |
| A_52_P168567  | NM_007678 | Cebpa     | 12606  | CCAAT/enhancer binding protein (C/EBP), alpha                         | -3.13 | 0.41 | 0.00 |
| A_52_P411833  | NA        | NA        | NA     | NA                                                                    | -1.89 | 0.41 | 0.04 |
| A_51_P236118  | U52523    | Ptpn18    | 19253  | protein tyrosine phosphatase, non-receptor type 18                    | -2.35 | 0.41 | 0.01 |
| A_52_P342773  | NM_177700 | Atmin     | 234776 | ATM interactor                                                        | -3.49 | 0.41 | 0.00 |
| A_51_P455671  | NM_080554 | Psmd5     | 66998  | proteasome (prosome, macropain) 26S subunit, non-ATPase, 5            | -2.81 | 0.41 | 0.00 |
| A_51_P118535  | AK012399  | 2700049A  | 76967  | RIKEN cDNA 2700049A03 gene                                            | -2.69 | 0.41 | 0.00 |
| A_52_P314349  | AK050104  | Acnat1    | 230161 | acyl-coenzyme A amino acid N-acyltransferase 1                        | -2.34 | 0.41 | 0.01 |
| A_52_P198949  | AK046588  | Esrra     | 26379  | estrogen related receptor, alpha                                      | -2.39 | 0.41 | 0.01 |
| A_51_P243134  | NM_007405 | Adcy6     | 11512  | adenylate cyclase 6                                                   | -2.81 | 0.41 | 0.00 |
| A_52_P588917  | XM_900750 | NA        | NA     | NA                                                                    | -2.57 | 0.41 | 0.00 |
| A_52_P262883  | NM_008889 | Ppp1r14b  | 18938  | protein phosphatase 1, regulatory (inhibitor) subunit 14B             | -2.62 | 0.40 | 0.00 |
| A_51_P174228  | AK143726  | Odf2      | 18286  | outer dense fiber of sperm tails 2                                    | -2.17 | 0.40 | 0.01 |
| A_51_P189361  | NM_027950 | Osgin1    | 71839  | oxidative stress induced growth inhibitor 1                           | -1.88 | 0.40 | 0.04 |
| A_51_P211526  | NM_026889 | 1500010J0 | 68964  | RIKEN cDNA 1500010J02 gene                                            | -2.40 | 0.40 | 0.00 |
| A_51_P137317  | NM_025873 | Trit1     | 66966  | tRNA isopentenyltransferase 1                                         | -2.75 | 0.40 | 0.00 |
| A_51_P222386  | NM_134023 | Tbc1d10a  | 103724 | TBC1 domain family, member 10a                                        | -3.35 | 0.40 | 0.00 |
| A_51_P479444  | NM_010544 | lhh       | 16147  | Indian hedgehog                                                       | -2.46 | 0.40 | 0.00 |
| A_52_P142390  | XM_001000 | NA        | NA     | NA                                                                    | -2.42 | 0.40 | 0.00 |
| A_52_P1021832 | AI627138  | NA        | NA     | NA                                                                    | -1.84 | 0.40 | 0.04 |
| A_52_P1074873 | AK132165  | Maf       | 17132  | avian musculoaponeurotic fibrosarcoma (v-maf) AS42 oncogene homolog   | -2.66 | 0.40 | 0.00 |
| A_51_P338461  | NM_133947 | Numa1     | 101706 | nuclear mitotic apparatus protein 1                                   | -2.78 | 0.40 | 0.00 |
| A_51_P138879  | NM_144894 | Zgpat     | 229007 | zinc finger, CCCH-type with G patch domain                            | -2.74 | 0.40 | 0.00 |
| A_51_P500152  | NM_145505 | Fam160b1  | 226252 | family with sequence similarity 160, member B1                        | -2.66 | 0.40 | 0.00 |
| A_51_P488092  | NM_008801 | Pde6d     | 18582  | phosphodiesterase 6D, cGMP-specific, rod, delta                       | -2.60 | 0.40 | 0.00 |
| A_51_P358243  | AK154853  | 2610029I0 | 77032  | RIKEN cDNA 2610029I01 gene                                            | -2.74 | 0.40 | 0.00 |

|              |           |           |        |                                                                                               |       |      |      |
|--------------|-----------|-----------|--------|-----------------------------------------------------------------------------------------------|-------|------|------|
| A_51_P463941 | NM_011919 | Ing1      | 26356  | inhibitor of growth family, member 1                                                          | -3.18 | 0.40 | 0.00 |
| A_52_P237352 | BC071194  | Zdhhc24   | 70605  | zinc finger, DHHC domain containing 24                                                        | -2.33 | 0.40 | 0.01 |
| A_52_P222073 | NM_021609 | Ccbp2     | 59289  | chemokine binding protein 2                                                                   | -2.15 | 0.40 | 0.01 |
| A_51_P341540 | NM_001003 | Dnmt3b    | 13436  | DNA methyltransferase 3B                                                                      | -2.43 | 0.40 | 0.00 |
| A_51_P348397 | NM_138753 | Hexim1    | 192231 | hexamethylene bis-acetamide inducible 1<br>proteasome (prosome, macropain) assembly chaperone | -2.38 | 0.40 | 0.01 |
| A_51_P289987 | NM_025604 | Psmg3     | 66506  | 3                                                                                             | -2.57 | 0.40 | 0.00 |
| A_51_P385390 | NM_022418 | Tmub1     | 64295  | transmembrane and ubiquitin-like domain containing 1                                          | -2.09 | 0.40 | 0.02 |
| A_51_P434953 | NM_029557 | Tsen54    | 76265  | tRNA splicing endonuclease 54 homolog ( <i>S. cerevisiae</i> )                                | -2.21 | 0.40 | 0.01 |
| A_51_P489153 | NM_023733 | Crot      | 74114  | carnitine O-octanoyltransferase<br>hexosaminidase (glycosyl hydrolase family 20, catalytic    | -1.35 | 0.40 | 0.34 |
| A_52_P610808 | NM_001001 | Hexdc     | 238023 | domain) containing                                                                            | -2.94 | 0.40 | 0.00 |
| A_51_P107991 | NM_001044 | Zfp2      | 22678  | zinc finger protein 2                                                                         | -2.79 | 0.40 | 0.00 |
| A_51_P404953 | NM_001003 | Kdm2b     | 30841  | lysine (K)-specific demethylase 2B                                                            | -2.57 | 0.40 | 0.00 |
| A_51_P341832 | NM_008743 | Nthl1     | 18207  | nth (endonuclease III)-like 1 ( <i>E.coli</i> )                                               | -2.71 | 0.40 | 0.00 |
| A_51_P416378 | NM_177644 | Rasal2    | 226525 | RAS protein activator like 2<br>glycerophosphodiester phosphodiesterase domain                | -3.01 | 0.40 | 0.00 |
| A_51_P426875 | NM_024228 | Gdpd3     | 68616  | containing 3                                                                                  | -1.07 | 0.40 | 1.04 |
| A_52_P526265 | AK220207  | Wdr73     | 71968  | WD repeat domain 73                                                                           | -2.91 | 0.40 | 0.00 |
| A_51_P185906 | NM_025659 | Abi3      | 66610  | ABI gene family, member 3                                                                     | -2.73 | 0.40 | 0.00 |
| A_52_P779355 | AK053107  | Sec14l2   | 67815  | SEC14-like 2 ( <i>S. cerevisiae</i> )                                                         | -2.42 | 0.40 | 0.00 |
| A_52_P213036 | BC041674  | Cul9      | 78309  | cullin 9                                                                                      | -2.79 | 0.40 | 0.00 |
| A_51_P347115 | NM_177045 | Cc2d1b    | 319965 | coiled-coil and C2 domain containing 1B                                                       | -2.42 | 0.40 | 0.00 |
| A_52_P54106  | AK034547  | Ghr       | 14600  | growth hormone receptor                                                                       | -2.04 | 0.40 | 0.02 |
| A_51_P217465 | NM_183148 | Iffo2     | 212632 | intermediate filament family orphan 2                                                         | -2.25 | 0.40 | 0.01 |
| A_51_P293665 | AK003646  | Cxx1b     | 553127 | CAAX box 1 homolog B (human)                                                                  | -2.92 | 0.40 | 0.00 |
| A_51_P413251 | XM_486328 | Gm4980    | 245190 | predicted gene 4980                                                                           | -3.00 | 0.40 | 0.00 |
| A_52_P561416 | NM_176952 | 6430573F1 | 319582 | RIKEN cDNA 6430573F11 gene                                                                    | -2.13 | 0.40 | 0.01 |
| A_52_P65703  | NM_178620 | Mfsd11    | 69900  | major facilitator superfamily domain containing 11                                            | -2.77 | 0.40 | 0.00 |
| A_51_P378667 | NM_144824 | Wrap53    | 216853 | WD repeat containing, antisense to TP53                                                       | -3.04 | 0.40 | 0.00 |
| A_52_P586865 | NM_178928 | Afap111   | 106877 | actin filament associated protein 1-like 1                                                    | -2.89 | 0.40 | 0.00 |

|              |                     |          |                            |                                                                                 |       |      |      |
|--------------|---------------------|----------|----------------------------|---------------------------------------------------------------------------------|-------|------|------|
| A_51_P415755 | AK052232            | Sema6d   | 214968                     | sema domain, transmembrane domain (TM), and cytoplasmic domain, (semaphorin) 6D | -2.58 | 0.40 | 0.00 |
| A_51_P357533 | NM_172614           | Tmem44   | 224090                     | transmembrane protein 44                                                        | -2.54 | 0.40 | 0.00 |
| A_51_P463994 | NM_021393           | Cobra1   | 58202                      | cofactor of BRCA1                                                               | -2.67 | 0.40 | 0.00 |
| A_52_P327146 | AK031552            | NA       | NA                         | NA                                                                              | -1.81 | 0.40 | 0.05 |
| A_51_P257675 | NM_030203           | Tsyp14   | 72480                      | TSPY-like 4                                                                     | -2.37 | 0.40 | 0.01 |
| A_52_P476029 | NM_001001:8430427H1 | 329540   | RIKEN cDNA 8430427H17 gene | -3.01                                                                           | 0.40  | 0.00 |      |
| A_52_P561746 | NM_009707           | Arhgap6  | 11856                      | Rho GTPase activating protein 6                                                 | -2.33 | 0.40 | 0.01 |
| A_52_P479249 | NM_009382           | Thy1     | 21838                      | thymus cell antigen 1, theta                                                    | -2.02 | 0.40 | 0.02 |
| A_51_P138673 | NM_175244           | Hectd3   | 76608                      | HECT domain containing 3                                                        | -2.92 | 0.40 | 0.00 |
| A_51_P511176 | NM_026933           | Triap1   | 69076                      | TP53 regulated inhibitor of apoptosis 1                                         | -3.02 | 0.40 | 0.00 |
| A_51_P140576 | NM_001038           | Mapt     | 17762                      | microtubule-associated protein tau                                              | -2.34 | 0.40 | 0.01 |
| A_51_P468558 | NM_172623           | Trem14   | 224840                     | triggering receptor expressed on myeloid cells-like 4                           | -2.91 | 0.40 | 0.00 |
| A_51_P174362 | NM_028789           | Unkl     | 74154                      | unkempt-like (Drosophila)                                                       | -2.47 | 0.40 | 0.00 |
| A_51_P321374 | NM_145521           | Ppapdc3  | 227721                     | phosphatidic acid phosphatase type 2 domain containing 3                        | -2.76 | 0.40 | 0.00 |
| A_52_P185639 | NM_175137           | Vars2    | 68915                      | valyl-tRNA synthetase 2, mitochondrial (putative)                               | -2.39 | 0.40 | 0.01 |
| A_51_P271865 | NM_016751           | Clec4f   | 51811                      | C-type lectin domain family 4, member f                                         | -2.91 | 0.40 | 0.00 |
| A_51_P285997 | NM_133941           | Dhx32    | 101437                     | DEAH (Asp-Glu-Ala-His) box polypeptide 32                                       | -3.20 | 0.40 | 0.00 |
| A_52_P176409 | NM_021528           | Chst12   | 59031                      | carbohydrate sulfotransferase 12                                                | -3.07 | 0.40 | 0.00 |
| A_51_P373226 | NM_019722           | Arl2     | 56327                      | ADP-ribosylation factor-like 2                                                  | -2.80 | 0.40 | 0.00 |
| A_52_P213916 | NM_194268           | Onecut2  | 225631                     | one cut domain, family member 2                                                 | -3.05 | 0.40 | 0.00 |
| A_51_P200477 | NM_008300           | Hspa4    | 15525                      | heat shock protein 4                                                            | -1.91 | 0.40 | 0.04 |
| A_51_P389811 | NM_028658           | Klraq1   | 73825                      | KLRAQ motif containing 1                                                        | -3.11 | 0.40 | 0.00 |
| A_52_P473344 | AK172219            | Srebf2   | 20788                      | sterol regulatory element binding factor 2                                      | -3.19 | 0.40 | 0.00 |
| A_51_P177897 | NM_011665           | Ube2i    | 22196                      | ubiquitin-conjugating enzyme E2I                                                | -3.69 | 0.40 | 0.00 |
| A_51_P509211 | NM_030564           | Rnf34    | 80751                      | ring finger protein 34                                                          | -2.56 | 0.40 | 0.00 |
| A_52_P30451  | NM_016854           | Ppp1r3c  | 53412                      | protein phosphatase 1, regulatory (inhibitor) subunit 3C                        | -1.81 | 0.40 | 0.05 |
| A_51_P133037 | NM_008889           | Ppp1r14b | 18938                      | protein phosphatase 1, regulatory (inhibitor) subunit 14B                       | -2.83 | 0.40 | 0.00 |
| A_51_P477676 | NM_173189           | Mcph1    | 244329                     | microcephaly, primary autosomal recessive 1                                     | -2.94 | 0.40 | 0.00 |

|              |           |                 |        |                                                         |       |      |      |
|--------------|-----------|-----------------|--------|---------------------------------------------------------|-------|------|------|
| A_52_P104562 | NM_001037 | Lipt1           | 623661 | lipoyltransferase 1                                     | -3.24 | 0.40 | 0.00 |
| A_51_P173107 | AK007796  | 1810046K069809  |        | RIKEN cDNA 1810046K07 gene                              | -1.83 | 0.40 | 0.04 |
| A_51_P129720 | NM_175244 | Hectd3          | 76608  | HECT domain containing 3                                | -2.79 | 0.40 | 0.00 |
|              |           |                 |        | UPF3 regulator of nonsense transcripts homolog B        |       |      |      |
| A_51_P162649 | NM_026573 | Upf3b           | 68134  | (yeast)                                                 | -2.20 | 0.40 | 0.01 |
| A_51_P510891 | NM_007423 | Afp             | 11576  | alpha fetoprotein                                       | -2.21 | 0.40 | 0.01 |
| A_52_P324336 | BC064790  | Hmgb1           | 15289  | high mobility group box 1                               | -2.75 | 0.40 | 0.00 |
| A_51_P190106 | BC033592  | Ralgps2         | 78255  | Ral GEF with PH domain and SH3 binding motif 2          | -2.50 | 0.40 | 0.00 |
| A_52_P672761 | NM_013689 | Tec             | 21682  | tec protein tyrosine kinase                             | -2.72 | 0.40 | 0.00 |
| A_52_P671625 | NM_194343 | Trim45          | 229644 | tripartite motif-containing 45                          | -3.03 | 0.40 | 0.00 |
| A_52_P91402  | NM_153160 | Zcchc17         | 619605 | zinc finger, CCHC domain containing 17                  | -2.87 | 0.40 | 0.00 |
| A_51_P106488 | AK164360  | Speg            | 11790  | SPEG complex locus                                      | -2.78 | 0.40 | 0.00 |
| A_51_P341498 | NM_026241 | Ankrd39         | 109346 | ankyrin repeat domain 39                                | -3.15 | 0.40 | 0.00 |
|              |           |                 |        |                                                         |       |      |      |
| A_51_P339417 | NM_013905 | Heyl            | 56198  | hairy/enhancer-of-split related with YRPW motif-like    | -3.40 | 0.40 | 0.00 |
| A_52_P535946 | NM_007856 | Dhcr7           | 13360  | 7-dehydrocholesterol reductase                          | -3.10 | 0.40 | 0.00 |
| A_51_P260178 | NM_058214 | Recql4          | 79456  | RecQ protein-like 4                                     | -3.66 | 0.40 | 0.00 |
|              |           |                 |        |                                                         |       |      |      |
| A_52_P481182 | NM_023377 | Stard5          | 170460 | StAR-related lipid transfer (START) domain containing 5 | -2.23 | 0.40 | 0.01 |
|              |           |                 |        |                                                         |       |      |      |
| A_52_P466993 | NM_023854 | Arfgap2         | 77038  | ADP-ribosylation factor GTPase activating protein 2     | -2.62 | 0.40 | 0.00 |
|              |           |                 |        | N-6 adenine-specific DNA methyltransferase 2            |       |      |      |
| A_51_P376149 | NM_026526 | N6amt2          | 68043  | (putative)                                              | -3.02 | 0.40 | 0.00 |
| A_51_P345274 | NM_194268 | Onecut2         | 225631 | one cut domain, family member 2                         | -2.90 | 0.40 | 0.00 |
| A_52_P612803 | NM_009831 | Ccng1           | 12450  | cyclin G1                                               | -2.15 | 0.40 | 0.01 |
| A_51_P301052 | NM_133998 | 1810008A1108707 |        | RIKEN cDNA 1810008A18 gene                              | -3.16 | 0.40 | 0.00 |
| A_51_P464588 | NM_138664 | Dnajc28         | 246738 | DnaJ (Hsp40) homolog, subfamily C, member 28            | -2.43 | 0.40 | 0.00 |
| A_51_P105869 | NM_028141 | Zfp661          | 72180  | zinc finger protein 661                                 | -2.88 | 0.39 | 0.00 |
| A_52_P391623 | NM_028777 | Sec14l1         | 74136  | SEC14-like 1 ( <i>S. cerevisiae</i> )                   | -3.40 | 0.39 | 0.00 |
| A_52_P643375 | BC075715  | Dmpk            | 13400  | dystrophia myotonica-protein kinase                     | -2.85 | 0.39 | 0.00 |
| A_52_P297016 | NM_175273 | 2310046O0698323 |        | RIKEN cDNA 2310046O06 gene                              | -2.53 | 0.39 | 0.00 |
| A_51_P508191 | NM_007834 | Dscr3           | 13185  | Down syndrome critical region gene 3                    | -3.04 | 0.39 | 0.00 |
| A_52_P54176  | NM_015732 | Axin2           | 12006  | axin2                                                   | -2.64 | 0.39 | 0.00 |
| A_51_P503542 | NM_026712 | Zfp414          | 328801 | zinc finger protein 414                                 | -3.19 | 0.39 | 0.00 |

|              |           |           |        |                                                            |       |      |      |
|--------------|-----------|-----------|--------|------------------------------------------------------------|-------|------|------|
| A_51_P307220 | NM_144849 | Ankrd54   | 223690 | ankyrin repeat domain 54                                   | -2.45 | 0.39 | 0.00 |
| A_52_P445316 | NM_025319 | 0610009B2 | 66050  | RIKEN cDNA 0610009B22 gene                                 | -3.07 | 0.39 | 0.00 |
| A_52_P137765 | NM_019390 | Lmna      | 16905  | lamin A                                                    | -2.74 | 0.39 | 0.00 |
| A_51_P240594 | NM_145916 | Zfp7      | 223669 | zinc finger protein 7                                      | -3.04 | 0.39 | 0.00 |
| A_52_P71135  | NM_001079 | Hnrnph3   | 432467 | heterogeneous nuclear ribonucleoprotein H3                 | -2.50 | 0.39 | 0.00 |
| A_51_P331028 | NA        | NA        | NA     | NA                                                         | -3.05 | 0.39 | 0.00 |
| A_51_P342906 | NM_009164 | Sh3bp1    | 20401  | SH3-domain binding protein 1                               | -3.32 | 0.39 | 0.00 |
| A_52_P393314 | NM_011027 | P2rx7     | 18439  | purinergic receptor P2X, ligand-gated ion channel, 7       | -2.48 | 0.39 | 0.00 |
| A_52_P788260 | NA        | NA        | NA     | NA                                                         | -2.90 | 0.39 | 0.00 |
| A_51_P517012 | AK005069  | Tysnd1    | 71767  | trypsin domain containing 1                                | -2.86 | 0.39 | 0.00 |
| A_51_P324134 | NM_138646 | Hps4      | 192232 | Hermansky-Pudlak syndrome 4 homolog (human)                | -2.69 | 0.39 | 0.00 |
| A_51_P484764 | NM_025473 | Fam3a     | 66294  | family with sequence similarity 3, member A                | -3.52 | 0.39 | 0.00 |
| A_52_P533083 | NM_172338 | Dnajc16   | 214063 | Dnaj (Hsp40) homolog, subfamily C, member 16               | -2.98 | 0.39 | 0.00 |
| A_51_P411130 | NM_027278 | 2810432D0 | 69961  | RIKEN cDNA 2810432D09 gene                                 | -2.92 | 0.39 | 0.00 |
| A_52_P93432  | M88489    | NA        | NA     | NA                                                         | -2.26 | 0.39 | 0.01 |
| A_51_P101573 | NM_029091 | Klc4      | 74764  | kinesin light chain 4                                      | -3.42 | 0.39 | 0.00 |
| A_51_P438952 | NM_026121 | Bag4      | 67384  | BCL2-associated athanogene 4                               | -2.51 | 0.39 | 0.00 |
| A_51_P511546 | NM_138595 | Gldc      | 104174 | glycine decarboxylase                                      | -2.16 | 0.39 | 0.01 |
| A_52_P94845  | NM_025449 | Nicn1     | 66257  | nicolin 1                                                  | -3.06 | 0.39 | 0.00 |
| A_51_P232868 | NM_176995 | EG240055  | 240055 | predicted gene, EG240055                                   | -3.09 | 0.39 | 0.00 |
| A_52_P176619 | AK028297  | 2610110G1 | 73242  | RIKEN cDNA 2610110G12 gene                                 | -2.82 | 0.39 | 0.00 |
| A_51_P157472 | NA        | NA        | NA     | NA                                                         | -1.56 | 0.39 | 0.15 |
| A_51_P251587 | NM_026000 | Psmd9     | 67151  | proteasome (prosome, macropain) 26S subunit, non-ATPase, 9 | -2.24 | 0.39 | 0.01 |
| A_51_P390996 | NM_029389 | Fam35a    | 75698  | family with sequence similarity 35, member A               | -2.44 | 0.39 | 0.00 |
| A_52_P8863   | AK031889  | NA        | NA     | NA                                                         | -2.88 | 0.39 | 0.00 |
| A_51_P184969 | NM_021430 | Rilpl1    | 75695  | Rab interacting lysosomal protein-like 1                   | -2.88 | 0.39 | 0.00 |
| A_51_P425772 | NM_021273 | Ckb       | 12709  | creatine kinase, brain                                     | -2.49 | 0.39 | 0.00 |
| A_52_P414138 | NM_133218 | Zfp704    | 170753 | zinc finger protein 704                                    | -2.98 | 0.39 | 0.00 |
| A_51_P484510 | NM_011848 | Nek3      | 23954  | NIMA (never in mitosis gene a)-related expressed kinase 3  | -3.36 | 0.39 | 0.00 |

|              |           |           |        |                                                                                                 |       |      |      |
|--------------|-----------|-----------|--------|-------------------------------------------------------------------------------------------------|-------|------|------|
| A_51_P379660 | NM_019914 | Mllt11    | 56772  | myeloid/lymphoid or mixed-lineage leukemia (trithorax homolog, Drosophila); translocated to, 11 | -3.12 | 0.39 | 0.00 |
| A_52_P883283 | AK034355  | NA        | NA     | NA                                                                                              | -3.05 | 0.39 | 0.00 |
| A_51_P503543 | NM_026712 | Zfp414    | 328801 | zinc finger protein 414                                                                         | -3.19 | 0.39 | 0.00 |
| A_51_P499905 | NM_010365 | Gtf2i     | 14886  | general transcription factor II I                                                               | -2.77 | 0.39 | 0.00 |
| A_51_P213334 | NM_144919 | Hdac11    | 232232 | histone deacetylase 11                                                                          | -2.61 | 0.39 | 0.00 |
| A_51_P274124 | NM_026345 | Mansc1    | 67729  | MANSC domain containing 1                                                                       | -3.09 | 0.39 | 0.00 |
| A_52_P668543 | NM_178611 | Lair1     | 52855  | leukocyte-associated Ig-like receptor 1                                                         | -2.65 | 0.39 | 0.00 |
| A_51_P514405 | NM_019741 | Slc2a5    | 56485  | solute carrier family 2 (facilitated glucose transporter), member 5                             | -2.19 | 0.39 | 0.01 |
| A_51_P256945 | NM_207525 | Opa3      | 403187 | optic atrophy 3 (human)                                                                         | -2.58 | 0.39 | 0.00 |
| A_52_P154710 | AK170547  | Sesn2     | 230784 | sestrin 2                                                                                       | -2.85 | 0.39 | 0.00 |
| A_52_P263289 | AK030267  | Trpc2     | 22064  | transient receptor potential cation channel, subfamily C, member 2                              | -3.02 | 0.39 | 0.00 |
| A_52_P66371  | NM_178420 | NlrX1     | 270151 | NLR family member X1                                                                            | -2.47 | 0.39 | 0.00 |
| A_51_P437289 | NM_133214 | BC017612  | 170748 | cDNA sequence BC017612                                                                          | -2.42 | 0.39 | 0.00 |
| A_51_P437478 | NM_152814 | Zfp566    | 72556  | zinc finger protein 566                                                                         | -2.50 | 0.39 | 0.00 |
| A_51_P342786 | AK029786  | Mlh3      | 217716 | mutL homolog 3 (E coli)                                                                         | -3.26 | 0.39 | 0.00 |
| A_51_P201187 | NM_026385 | Plip      | 67801  | plasma membrane proteolipid                                                                     | -3.26 | 0.39 | 0.00 |
| A_51_P262101 | NM_026873 | Ptcd2     | 68927  | pentatricopeptide repeat domain 2                                                               | -2.97 | 0.39 | 0.00 |
| A_51_P165210 | NM_017402 | Arhgef7   | 54126  | Rho guanine nucleotide exchange factor (GEF7)                                                   | -3.08 | 0.39 | 0.00 |
| A_51_P519008 | NM_177595 | Mkx       | 210719 | mohawk homeobox                                                                                 | -2.16 | 0.39 | 0.01 |
| A_51_P332264 | NM_026314 | Dyx1c1    | 67685  | dyslexia susceptibility 1 candidate 1 homolog (human)                                           | -3.37 | 0.39 | 0.00 |
| A_51_P193395 | NM_172428 | Ccdc134   | 76457  | coiled-coil domain containing 134                                                               | -2.55 | 0.39 | 0.00 |
| A_52_P623211 | AK053175  | 2610301F0 | 545428 | RIKEN cDNA 2610301F02 gene                                                                      | -2.48 | 0.39 | 0.00 |
| A_51_P451428 | NM_001038 | Marvel2   | 218518 | MARVEL (membrane-associating) domain containing 2                                               | -2.13 | 0.39 | 0.01 |
| A_51_P127635 | NM_001013 | Ttf2      | 74044  | transcription termination factor, RNA polymerase II                                             | -2.66 | 0.39 | 0.00 |
| A_52_P501167 | XM_620568 | NA        | NA     | NA                                                                                              | -2.78 | 0.39 | 0.00 |
| A_52_P380825 | NM_144550 | Ccdc52    | 212514 | coiled-coil domain containing 52                                                                | -2.94 | 0.39 | 0.00 |
| A_52_P124083 | AK087552  | A530082C1 | 320541 | RIKEN cDNA A530082C11 gene                                                                      | -2.72 | 0.39 | 0.00 |

|               |           |           |        |                                                                          |       |      |      |
|---------------|-----------|-----------|--------|--------------------------------------------------------------------------|-------|------|------|
| A_52_P1075773 | AK036921  | 9930024M  | 399602 | RIKEN cDNA 9930024M15 gene                                               | -2.03 | 0.39 | 0.02 |
| A_52_P141662  | NM_011548 | Tcf3      | 21423  | transcription factor 3                                                   | -2.62 | 0.39 | 0.00 |
| A_52_P132507  | NM_173347 | Prune     | 229589 | prune homolog (Drosophila)                                               | -2.46 | 0.39 | 0.00 |
| A_51_P343900  | NM_009532 | Xrcc1     | 22594  | X-ray repair complementing defective repair in Chinese hamster cells 1   | -2.92 | 0.39 | 0.00 |
| A_52_P353698  | NM_011999 | Clec4a2   | 26888  | C-type lectin domain family 4, member a2                                 | -2.63 | 0.39 | 0.00 |
| A_51_P222467  | NM_009593 | Abcg1     | 11307  | ATP-binding cassette, sub-family G (WHITE), member 1                     | -2.77 | 0.39 | 0.00 |
| A_51_P222283  | NM_019966 | Mlycd     | 56690  | malonyl-CoA decarboxylase                                                | -3.32 | 0.39 | 0.00 |
| A_51_P477419  | NM_008688 | Nfic      | 18029  | nuclear factor I/C                                                       | -2.94 | 0.39 | 0.00 |
| A_52_P297457  | BC066053  | 0610030E2 | 68364  | RIKEN cDNA 0610030E20 gene                                               | -3.12 | 0.39 | 0.00 |
| A_51_P291139  | NM_026573 | Upf3b     | 68134  | UPF3 regulator of nonsense transcripts homolog B (yeast)                 | -1.84 | 0.39 | 0.04 |
| A_52_P252258  | NM_013871 | Mapk12    | 29857  | mitogen-activated protein kinase 12                                      | -3.01 | 0.39 | 0.00 |
| A_51_P350378  | NA        | NA        | NA     | NA                                                                       | -2.46 | 0.39 | 0.00 |
| A_52_P479899  | BC031905  | Trim41    | 211007 | tripartite motif-containing 41                                           | -2.45 | 0.39 | 0.00 |
| A_51_P505974  | AK038328  | NA        | NA     | NA                                                                       | -2.04 | 0.39 | 0.02 |
| A_51_P402378  | NM_025404 | Arl4d     | 80981  | ADP-ribosylation factor-like 4D                                          | -1.34 | 0.39 | 0.37 |
| A_52_P603038  | NM_016968 | Olig1     | 50914  | oligodendrocyte transcription factor 1                                   | -1.92 | 0.39 | 0.03 |
| A_52_P884435  | AK079271  | Furin     | 18550  | furin (paired basic amino acid cleaving enzyme)                          | -2.74 | 0.39 | 0.00 |
| A_52_P634607  | NA        | NA        | NA     | NA                                                                       | -2.63 | 0.39 | 0.00 |
| A_51_P456136  | NM_028284 | Bbs5      | 72569  | Bardet-Biedl syndrome 5 (human)                                          | -3.09 | 0.39 | 0.00 |
| A_52_P411716  | BB113933  | Polh      | 80905  | polymerase (DNA directed), eta (RAD 30 related)                          | -2.12 | 0.39 | 0.01 |
| A_52_P506344  | NM_024256 | B3gat3    | 72727  | beta-1,3-glucuronyltransferase 3 (glucuronosyltransferase I)             | -3.33 | 0.39 | 0.00 |
| A_52_P224348  | NM_175429 | Kctd12b   | 207474 | potassium channel tetramerisation domain containing 12b                  | -2.41 | 0.39 | 0.00 |
| A_52_P663303  | NM_146039 | Wdr60     | 217935 | WD repeat domain 60                                                      | -2.11 | 0.39 | 0.01 |
| A_51_P479769  | NM_028779 | Ampd2     | 109674 | adenosine monophosphate deaminase 2 (isoform L)                          | -2.83 | 0.39 | 0.00 |
| A_52_P240754  | NM_010756 | Mafg      | 17134  | v-maf musculoaponeurotic fibrosarcoma oncogene family, protein G (avian) | -2.42 | 0.39 | 0.00 |
| A_51_P286172  | NM_145503 | Lzts2     | 226154 | leucine zipper, putative tumor suppressor 2                              | -2.92 | 0.39 | 0.00 |



|              |           |           |        |                                                                                       |       |      |      |
|--------------|-----------|-----------|--------|---------------------------------------------------------------------------------------|-------|------|------|
| A_51_P337662 | NM_172779 | Ddx26b    | 236790 | DEAD/H (Asp-Glu-Ala-Asp/His) box polypeptide 26B                                      | -2.74 | 0.38 | 0.00 |
| A_51_P108779 | NM_023131 | Rce1      | 19671  | RCE1 homolog, prenyl protein peptidase ( <i>S. cerevisiae</i> )                       | -2.79 | 0.38 | 0.00 |
| A_51_P400816 | NM_175543 | Rab11fip4 | 268451 | RAB11 family interacting protein 4 (class II)                                         | -2.78 | 0.38 | 0.00 |
| A_52_P539361 | NM_001033 | 2610002J0 | 67513  | RIKEN cDNA 2610002J02 gene                                                            | -2.61 | 0.38 | 0.00 |
| A_51_P394394 | NM_027533 | Tspan2    | 70747  | tetraspanin 2                                                                         | -2.62 | 0.38 | 0.00 |
| A_51_P116407 | NM_013753 | X99384    | 27355  | cDNA sequence X99384                                                                  | -3.13 | 0.38 | 0.00 |
| A_51_P248629 | NM_001037 | Arhgap25  | 232201 | Rho GTPase activating protein 25                                                      | -2.55 | 0.38 | 0.00 |
| A_52_P439129 | NM_019400 | Rabep1    | 54189  | rabaptin, RAB GTPase binding effector protein 1                                       | -2.45 | 0.38 | 0.00 |
| A_52_P56818  | NM_053242 | Foxp2     | 114142 | forkhead box P2                                                                       | -2.87 | 0.38 | 0.00 |
| A_51_P280446 | NM_022324 | Sdf2l1    | 64136  | stromal cell-derived factor 2-like 1                                                  | -2.00 | 0.38 | 0.02 |
| A_52_P100242 | NM_026510 | Ftsj2     | 68017  | FtsJ homolog 2 ( <i>E. coli</i> )                                                     | -2.73 | 0.38 | 0.00 |
| A_52_P470401 | NM_025708 | Tmem186   | 66690  | transmembrane protein 186                                                             | -2.89 | 0.38 | 0.00 |
| A_51_P507778 | NM_028725 | Sdr42e1   | 74032  | short chain dehydrogenase/reductase family 42E, member 1                              | -2.59 | 0.38 | 0.00 |
| A_51_P365409 | NM_028040 | Rpusd4    | 71989  | RNA pseudouridylate synthase domain containing 4                                      | -3.35 | 0.38 | 0.00 |
| A_51_P317115 | NM_175450 | Wdr18     | 216156 | WD repeat domain 18                                                                   | -3.53 | 0.38 | 0.00 |
| A_52_P397678 | NM_178916 | Rfesd     | 218341 | Rieske (Fe-S) domain containing                                                       | -3.52 | 0.38 | 0.00 |
| A_52_P257026 | AF039839  | NA        | NA     | NA                                                                                    | -2.14 | 0.38 | 0.01 |
| A_51_P152423 | NM_177640 | D030056L2 | 225995 | RIKEN cDNA D030056L22 gene                                                            | -3.31 | 0.38 | 0.00 |
| A_51_P265106 | NM_145614 | Dlat      | 235339 | dihydrolipoamide S-acetyltransferase (E2 component of pyruvate dehydrogenase complex) | -3.37 | 0.38 | 0.00 |
| A_52_P72546  | AK012955  | 2810055G2 | 77994  | RIKEN cDNA 2810055G20 gene                                                            | -2.83 | 0.38 | 0.00 |
| A_52_P3229   | NM_009924 | Cnr2      | 12802  | cannabinoid receptor 2 (macrophage)                                                   | -2.83 | 0.38 | 0.00 |
| A_52_P57686  | NM_144820 | Ccdc28a   | 215814 | coiled-coil domain containing 28A                                                     | -2.69 | 0.38 | 0.00 |
| A_51_P284966 | NM_177648 | Dolk      | 227697 | dolichol kinase                                                                       | -3.07 | 0.38 | 0.00 |
| A_52_P542612 | NM_010144 | Ephb4     | 13846  | Eph receptor B4                                                                       | -3.45 | 0.38 | 0.00 |
| A_52_P38964  | AK131167  | Lrch4     | 231798 | leucine-rich repeats and calponin homology (CH) domain containing 4                   | -2.56 | 0.38 | 0.00 |
| A_51_P511448 | NM_172718 | Sgsm1     | 52850  | small G protein signaling modulator 1                                                 | -2.44 | 0.38 | 0.00 |

|              |           |           |        |                                                               |       |      |      |
|--------------|-----------|-----------|--------|---------------------------------------------------------------|-------|------|------|
| A_52_P182520 | BC028435  | Timm9     | 30056  | translocase of inner mitochondrial membrane 9 homolog (yeast) | -2.63 | 0.38 | 0.00 |
| A_51_P456366 | NM_001047 | Pard6a    | 56513  | par-6 (partitioning defective 6,) homolog alpha (C. elegans)  | -2.80 | 0.38 | 0.00 |
| A_51_P492410 | NM_026784 | Pmvk      | 68603  | phosphomevalonate kinase                                      | -2.16 | 0.38 | 0.01 |
| A_51_P496715 | NM_029037 | 4930444AC | 74653  | RIKEN cDNA 4930444A02 gene                                    | -2.33 | 0.38 | 0.01 |
| A_51_P324934 | AK088142  | Mcm3      | 17215  | minichromosome maintenance deficient 3 (S. cerevisiae)        | -2.35 | 0.38 | 0.01 |
| A_51_P495540 | NM_011063 | Pea15a    | 18611  | phosphoprotein enriched in astrocytes 15A                     | -2.87 | 0.38 | 0.00 |
| A_51_P143682 | NM_021346 | Zfp318    | 57908  | zinc finger protein 318                                       | -2.97 | 0.38 | 0.00 |
| A_52_P229648 | NM_011862 | Pacsin2   | 23970  | protein kinase C and casein kinase substrate in neurons 2     | -2.74 | 0.38 | 0.00 |
| A_51_P150430 | NM_023290 | Mkrn2     | 67027  | makorin, ring finger protein, 2                               | -3.21 | 0.38 | 0.00 |
| A_51_P325274 | NM_016683 | Zkscan5   | 22757  | zinc finger with KRAB and SCAN domains 5                      | -3.04 | 0.38 | 0.00 |
| A_51_P428134 | NM_177152 | Lrig3     | 320398 | leucine-rich repeats and immunoglobulin-like domains 3        | -1.70 | 0.38 | 0.09 |
| A_52_P364386 | NM_172748 | Fbxl19    | 233902 | F-box and leucine-rich repeat protein 19                      | -3.50 | 0.38 | 0.00 |
| A_51_P180061 | NM_028717 | Als2      | 74018  | amyotrophic lateral sclerosis 2 (juvenile) homolog (human)    | -2.06 | 0.38 | 0.02 |
| A_52_P85292  | NM_212473 | Fam53b    | 77938  | family with sequence similarity 53, member B                  | -2.80 | 0.38 | 0.00 |
| A_52_P409769 | NM_194464 | Mrvi1     | 17540  | MRV integration site 1                                        | -3.52 | 0.38 | 0.00 |
| A_51_P505172 | NM_025674 | Tcf19     | 106795 | transcription factor 19                                       | -3.08 | 0.38 | 0.00 |
| A_51_P334308 | NM_145928 | Tspan14   | 52588  | tetraspanin 14                                                | -2.37 | 0.38 | 0.01 |
| A_51_P485800 | NM_010048 | Dgcr2     | 13356  | DiGeorge syndrome critical region gene 2                      | -3.71 | 0.38 | 0.00 |
| A_51_P211488 | NM_024472 | Gltpd1    | 79554  | glycolipid transfer protein domain containing 1               | -2.50 | 0.38 | 0.00 |
| A_51_P234044 | NM_197988 | 119000510 | 68918  | RIKEN cDNA 1190005106 gene                                    | -3.19 | 0.38 | 0.00 |
| A_52_P350750 | NM_015730 | Chrna4    | 11438  | cholinergic receptor, nicotinic, alpha polypeptide 4          | -1.86 | 0.38 | 0.04 |
| A_51_P424448 | NM_019929 | Sumo3     | 20610  | SMT3 suppressor of mif two 3 homolog 3 (yeast)                | -3.10 | 0.38 | 0.00 |
| A_51_P413965 | DV056587  | NA        | NA     | NA                                                            | -3.26 | 0.38 | 0.00 |
| A_52_P90101  | AK036209  | Atxn2     | 20239  | ataxin 2                                                      | -2.61 | 0.38 | 0.00 |
| A_51_P290521 | NM_153780 | 2610044O1 | 172139 | RIKEN cDNA 2610044O15 gene                                    | -3.05 | 0.38 | 0.00 |
| A_52_P595561 | NM_133924 | Snx21     | 101113 | sorting nexin family member 21                                | -3.49 | 0.38 | 0.00 |

|              |                     |                  |        |                                                         |       |      |      |
|--------------|---------------------|------------------|--------|---------------------------------------------------------|-------|------|------|
| A_51_P212682 | NM_027290           | Mcm10            | 70024  | minichromosome maintenance deficient 10 (S. cerevisiae) | -2.71 | 0.38 | 0.00 |
| A_52_P296109 | AK078667            | Cstf1            | 67337  | cleavage stimulation factor, 3' pre-RNA, subunit 1      | -3.21 | 0.38 | 0.00 |
| A_51_P484526 | NM_011915           | Wif1             | 24117  | Wnt inhibitory factor 1                                 | -2.33 | 0.38 | 0.01 |
| A_52_P557053 | NM_011235           | Rad51l3          | 19364  | RAD51-like 3 (S. cerevisiae)                            | -2.77 | 0.38 | 0.00 |
| A_52_P638513 | NM_133677           | 2310061J0:66391  |        | RIKEN cDNA 2310061J03 gene                              | -3.02 | 0.38 | 0.00 |
| A_51_P383218 | NM_145597           | Tmem161a         | 234371 | transmembrane protein 161A                              | -2.58 | 0.38 | 0.00 |
| A_52_P42115  | NM_029377           | Lin37            | 75660  | lin-37 homolog (C. elegans)                             | -3.33 | 0.38 | 0.00 |
| A_51_P232556 | NM_028721           | Nphp3            | 74025  | nephronophthisis 3 (adolescent)                         | -3.12 | 0.38 | 0.00 |
| A_51_P296737 | NM_027211           | Anxa13           | 69787  | annexin A13                                             | -1.21 | 0.38 | 0.61 |
| A_51_P313561 | NM_019390           | Lmna             | 16905  | lamin A                                                 | -2.62 | 0.38 | 0.00 |
| A_51_P129895 | NM_007744           | Comt1            | 12846  | catechol-O-methyltransferase 1                          | -3.01 | 0.38 | 0.00 |
| A_52_P504687 | NM_001033:6430526N2 | 319748           |        | RIKEN cDNA 6430526N21 gene                              | -2.41 | 0.38 | 0.00 |
| A_51_P279693 | NM_009992           | Cyp1a1           | 13076  | cytochrome P450, family 1, subfamily a, polypeptide 1   | -2.83 | 0.38 | 0.00 |
| A_52_P384314 | NM_178066           | 1110012D0:73827  |        | RIKEN cDNA 1110012D08 gene                              | -3.05 | 0.38 | 0.00 |
| A_51_P118539 | AK012399            | 2700049A0:76967  |        | RIKEN cDNA 2700049A03 gene                              | -2.87 | 0.38 | 0.00 |
| A_52_P170735 | NM_011675           | Uck1             | 22245  | uridine-cytidine kinase 1                               | -3.51 | 0.38 | 0.00 |
| A_51_P437144 | NM_026556           | Dynll2           | 68097  | dynein light chain LC8-type 2                           | -2.65 | 0.38 | 0.00 |
| A_51_P155714 | AK014457            | Traf3ip1         | 74019  | TRAF3 interacting protein 1                             | -2.83 | 0.38 | 0.00 |
| A_52_P35915  | NM_172691           | B230312A2:230088 |        | RIKEN cDNA B230312A22 gene                              | -3.31 | 0.38 | 0.00 |
| A_51_P296100 | NM_145999           | Rhot2            | 214952 | ras homolog gene family, member T2                      | -3.24 | 0.38 | 0.00 |
| A_51_P499061 | NM_173755           | Ube2o            | 217342 | ubiquitin-conjugating enzyme E2O                        | -3.25 | 0.38 | 0.00 |
| A_52_P455295 | NM_145151           | Crebzf           | 233490 | CREB/ATF bZIP transcription factor                      | -2.87 | 0.38 | 0.00 |
| A_51_P250934 | NM_010476           | Hsd17b7          | 15490  | hydroxysteroid (17-beta) dehydrogenase 7                | -2.30 | 0.38 | 0.01 |
| A_51_P233583 | NM_019985           | Clec1b           | 56760  | C-type lectin domain family 1, member b                 | -3.02 | 0.38 | 0.00 |
| A_51_P236439 | NM_177322           | Agtr1a           | 11607  | angiotensin II receptor, type 1a                        | -2.41 | 0.38 | 0.00 |
| A_52_P666930 | NM_178060           | Thra             | 21833  | thyroid hormone receptor alpha                          | -3.40 | 0.38 | 0.00 |
| A_51_P251069 | NM_008961           | Pter             | 19212  | phosphotriesterase related                              | -2.46 | 0.38 | 0.00 |
| A_52_P566030 | NM_025901           | Polr3k           | 67005  | polymerase (RNA) III (DNA directed) polypeptide K       | -2.73 | 0.38 | 0.00 |
| A_51_P459402 | NM_029875           | Slc35e3          | 215436 | solute carrier family 35, member E3                     | -2.93 | 0.37 | 0.00 |
| A_51_P344668 | NM_008999           | Rab23            | 19335  | RAB23, member RAS oncogene family                       | -2.87 | 0.37 | 0.00 |
| A_52_P61273  | NM_172736           | Leng8            | 232798 | leukocyte receptor cluster (LRC) member 8               | -2.29 | 0.37 | 0.01 |

|              |           |            |        |                                                                                                               |       |      |      |
|--------------|-----------|------------|--------|---------------------------------------------------------------------------------------------------------------|-------|------|------|
| A_51_P174384 | NM_028662 | Slc35b2    | 73836  | solute carrier family 35, member B2                                                                           | -3.31 | 0.37 | 0.00 |
| A_51_P137168 | NM_018817 | Smarcal1   | 54380  | SWI/SNF related matrix associated, actin dependent regulator of chromatin, subfamily a-like 1                 | -3.29 | 0.37 | 0.00 |
| A_51_P228916 | NM_019402 | Pabpn1     | 54196  | poly(A) binding protein, nuclear 1                                                                            | -3.00 | 0.37 | 0.00 |
| A_51_P218805 | NM_023040 | Gfer       | 11692  | growth factor, erv1 ( <i>S. cerevisiae</i> )-like (augmenter of liver regeneration)                           | -2.49 | 0.37 | 0.00 |
| A_52_P179068 | NM_017469 | Gucy1b3    | 54195  | guanylate cyclase 1, soluble, beta 3                                                                          | -2.80 | 0.37 | 0.00 |
| A_51_P224517 | NM_172303 | Phf17      | 269424 | PHD finger protein 17                                                                                         | -3.36 | 0.37 | 0.00 |
| A_51_P482711 | NM_053272 | Dhcr24     | 74754  | 24-dehydrocholesterol reductase                                                                               | -3.07 | 0.37 | 0.00 |
| A_52_P639101 | NM_145471 | Lrrc14     | 223664 | leucine rich repeat containing 14                                                                             | -2.81 | 0.37 | 0.00 |
| A_52_P676744 | NM_016973 | St6galnac6 | 50935  | ST6 (alpha-N-acetyl-neuraminyl-2,3-beta-galactosyl-1,3)-N-acetylgalactosaminide alpha-2,6-sialyltransferase 6 | -2.82 | 0.37 | 0.00 |
| A_52_P391516 | NM_025411 | 1110049F1  | 66193  | RIKEN cDNA 1110049F12 gene                                                                                    | -3.33 | 0.37 | 0.00 |
| A_52_P108447 | NM_031184 | Glis2      | 83396  | GLIS family zinc finger 2                                                                                     | -2.63 | 0.37 | 0.00 |
| A_52_P214927 | BC063267  | Zmynd8     | 228880 | zinc finger, MYND-type containing 8                                                                           | -3.17 | 0.37 | 0.00 |
| A_52_P27678  | AK048657  | Lpin2      | 64898  | lipin 2                                                                                                       | -1.38 | 0.37 | 0.30 |
| A_51_P345110 | NM_025920 | Thap4      | 67026  | THAP domain containing 4                                                                                      | -3.52 | 0.37 | 0.00 |
| A_52_P585104 | NM_010219 | Fkbp4      | 14228  | FK506 binding protein 4                                                                                       | -3.45 | 0.37 | 0.00 |
| A_51_P473229 | NM_009565 | Zbtb7b     | 22724  | zinc finger and BTB domain containing 7B                                                                      | -3.05 | 0.37 | 0.00 |
| A_51_P345792 | NM_029186 | Tmem180    | 75146  | transmembrane protein 180                                                                                     | -2.98 | 0.37 | 0.00 |
| A_52_P576854 | NM_027950 | Osgin1     | 71839  | oxidative stress induced growth inhibitor 1                                                                   | -1.72 | 0.37 | 0.07 |
| A_51_P423143 | NM_176828 | C030006K1  | 223665 | RIKEN cDNA C030006K11 gene                                                                                    | -3.38 | 0.37 | 0.00 |
| A_52_P742248 | NM_001037 | Fam117b    | 72750  | family with sequence similarity 117, member B                                                                 | -2.39 | 0.37 | 0.01 |
| A_51_P155142 | NM_026560 | Cdca8      | 52276  | cell division cycle associated 8                                                                              | -3.15 | 0.37 | 0.00 |
| A_52_P323151 | CD539668  | NA         | NA     | NA                                                                                                            | -3.08 | 0.37 | 0.00 |
| A_52_P574081 | NM_026962 | Kbtbd3     | 69149  | kelch repeat and BTB (POZ) domain containing 3                                                                | -2.62 | 0.37 | 0.00 |
| A_51_P200960 | NM_025808 | Lztr1      | 66863  | leucine-zipper-like transcriptional regulator, 1                                                              | -2.73 | 0.37 | 0.00 |
| A_52_P268764 | NM_001038 | Fn3k       | 63828  | fructosamine 3 kinase                                                                                         | -3.33 | 0.37 | 0.00 |
| A_51_P104747 | NM_010364 | Gtf2h4     | 14885  | general transcription factor II H, polypeptide 4                                                              | -3.51 | 0.37 | 0.00 |
| A_52_P684057 | NM_178374 | Snupn      | 66069  | snurportin 1                                                                                                  | -3.08 | 0.37 | 0.00 |
| A_51_P385906 | XM_986527 | NA         | NA     | NA                                                                                                            | -1.87 | 0.37 | 0.04 |
| A_51_P221428 | NM_028763 | Cbx6       | 494448 | chromobox homolog 6                                                                                           | -3.10 | 0.37 | 0.00 |

|              |           |           |        |                                                                                                         |       |      |      |
|--------------|-----------|-----------|--------|---------------------------------------------------------------------------------------------------------|-------|------|------|
| A_52_P501707 | DV046984  | NA        | NA     | NA                                                                                                      | -3.20 | 0.37 | 0.00 |
| A_52_P684130 | NM_001033 | 2510002D2 | 72307  | RIKEN cDNA 2510002D24 gene                                                                              | -2.81 | 0.37 | 0.00 |
| A_51_P338413 | NM_019992 | Stap1     | 56792  | signal transducing adaptor family member 1                                                              | -2.96 | 0.37 | 0.00 |
| A_51_P367240 | NM_146173 | Tspan33   | 232670 | tetraspanin 33                                                                                          | -2.88 | 0.37 | 0.00 |
| A_52_P28775  | NM_172573 | Engase    | 217364 | endo-beta-N-acetylglucosaminidase<br>sterol-C5-desaturase (fungal ERG3, delta-5-desaturase)             | -3.33 | 0.37 | 0.00 |
| A_51_P418056 | NM_172769 | Sc5d      | 235293 | homolog ( <i>S. cerevisiae</i> )                                                                        | -2.65 | 0.37 | 0.00 |
| A_52_P27117  | NA        | NA        | NA     | NA                                                                                                      | -3.00 | 0.37 | 0.00 |
| A_52_P478339 | NM_026527 | Chac2     | 68044  | ChaC, cation transport regulator homolog 2 ( <i>E. coli</i> )                                           | -2.67 | 0.37 | 0.00 |
| A_51_P365656 | NM_029649 | Tmem101   | 76547  | transmembrane protein 101                                                                               | -2.89 | 0.37 | 0.00 |
| A_51_P292757 | NM_025988 | Acbd4     | 67131  | acyl-Coenzyme A binding domain containing 4                                                             | -2.99 | 0.37 | 0.00 |
| A_52_P517668 | NA        | NA        | NA     | NA                                                                                                      | -2.02 | 0.37 | 0.02 |
| A_51_P490955 | NM_001039 | Zfp784    | 654801 | zinc finger protein 784                                                                                 | -3.37 | 0.37 | 0.00 |
| A_52_P493925 | BB385819  | NA        | NA     | NA                                                                                                      | -3.62 | 0.37 | 0.00 |
| A_51_P443723 | NM_211358 | Slc35c1   | 228368 | solute carrier family 35, member C1                                                                     | -2.74 | 0.37 | 0.00 |
| A_51_P364168 | NM_008513 | Lrp5      | 16973  | low density lipoprotein receptor-related protein 5<br>phosphatidylinositol-4-phosphate 5-kinase, type 1 | -3.08 | 0.37 | 0.00 |
| A_52_P271910 | AK122319  | Pip5k1c   | 18717  | gamma                                                                                                   | -2.93 | 0.37 | 0.00 |
| A_52_P600274 | NM_175093 | Trib3     | 228775 | tribbles homolog 3 ( <i>Drosophila</i> )                                                                | -2.54 | 0.37 | 0.00 |
| A_52_P76899  | NM_133858 | Fam63a    | 75007  | family with sequence similarity 63, member A                                                            | -2.42 | 0.37 | 0.00 |
| A_51_P341918 | NM_009366 | Tsc22d1   | 21807  | TSC22 domain family, member 1                                                                           | -2.33 | 0.37 | 0.01 |
| A_51_P189814 | NM_013805 | Cldn5     | 12741  | claudin 5                                                                                               | -2.34 | 0.37 | 0.01 |
| A_51_P291819 | NM_024210 | 2310033P0 | 67862  | RIKEN cDNA 2310033P09 gene                                                                              | -2.46 | 0.37 | 0.00 |
| A_52_P821110 | AK157673  | Opa3      | 403187 | optic atrophy 3 (human)                                                                                 | -3.68 | 0.37 | 0.00 |
| A_52_P405510 | NM_010048 | Dgcr2     | 13356  | DiGeorge syndrome critical region gene 2<br>protein phosphatase 1, regulatory (inhibitor) subunit       | -3.48 | 0.37 | 0.00 |
| A_51_P432460 | NM_026731 | Ppp1r14a  | 68458  | 14A                                                                                                     | -3.25 | 0.37 | 0.00 |
| A_51_P142923 | NM_013490 | Chka      | 12660  | choline kinase alpha                                                                                    | -2.56 | 0.37 | 0.00 |
| A_51_P176661 | NM_175286 | C430004E1 | 97031  | RIKEN cDNA C430004E15 gene                                                                              | -2.87 | 0.37 | 0.00 |
| A_51_P467505 | NM_013689 | Tec       | 21682  | tec protein tyrosine kinase                                                                             | -3.00 | 0.37 | 0.00 |
| A_51_P112912 | NM_025846 | Rras2     | 66922  | related RAS viral (r-ras) oncogene homolog 2                                                            | -3.33 | 0.37 | 0.00 |
| A_52_P429909 | NM_026556 | Dynll2    | 68097  | dynein light chain LC8-type 2                                                                           | -3.11 | 0.37 | 0.00 |

|              |           |         |        |                                                         |       |      |      |
|--------------|-----------|---------|--------|---------------------------------------------------------|-------|------|------|
| A_51_P431996 | NM_175494 | Zfp367  | 238673 | zinc finger protein 367                                 | -2.79 | 0.37 | 0.00 |
| A_52_P73986  | NM_008639 | Mtnr1a  | 17773  | melatonin receptor 1A                                   | -3.32 | 0.37 | 0.00 |
| A_51_P317673 | NM_146203 | Zfp764  | 233893 | zinc finger protein 764                                 | -3.15 | 0.37 | 0.00 |
| A_51_P109258 | NM_138686 | Cys1    | 12879  | cystin 1                                                | -2.79 | 0.37 | 0.00 |
| A_51_P221337 | NM_145824 | Ranbp10 | 74334  | RAN binding protein 10                                  | -2.42 | 0.37 | 0.00 |
| A_51_P331385 | NM_146169 | Paip2b  | 232164 | poly(A) binding protein interacting protein 2B          | -3.47 | 0.37 | 0.00 |
| A_51_P451106 | NM_009765 | Brca2   | 12190  | breast cancer 2                                         | -3.06 | 0.37 | 0.00 |
| A_52_P487436 | NM_145829 | Nags    | 217214 | N-acetylglutamate synthase                              | -3.35 | 0.37 | 0.00 |
|              |           |         |        | nuclear factor of kappa light polypeptide gene enhancer |       |      |      |
| A_51_P497402 | NM_183091 | Nfkbil2 | 72749  | in B-cells inhibitor-like 2                             | -3.20 | 0.37 | 0.00 |
| A_51_P301023 | NM_133895 | Slc15a4 | 100561 | solute carrier family 15, member 4                      | -2.93 | 0.37 | 0.00 |
| A_52_P646705 | NM_133850 | CommD7  | 99311  | COMM domain containing 7                                | -3.26 | 0.37 | 0.00 |
| A_51_P475228 | NM_133972 | Armc6   | 76813  | armadillo repeat containing 6                           | -3.48 | 0.37 | 0.00 |
| A_52_P675381 | NM_011379 | Sipa1   | 20469  | signal-induced proliferation associated gene 1          | -3.73 | 0.37 | 0.00 |
| A_51_P135322 | NM_019478 | Pqbp1   | 54633  | polyglutamine binding protein 1                         | -3.27 | 0.37 | 0.00 |
| A_51_P271733 | NM_033144 | 8-Sep   | 20362  | septin 8                                                | -2.94 | 0.37 | 0.00 |
| A_51_P138972 | NM_013929 | Siva1   | 30954  | SIVA1, apoptosis-inducing factor                        | -2.66 | 0.37 | 0.00 |
| A_51_P201532 | NM_001002 | Nup85   | 445007 | nucleoporin 85                                          | -2.81 | 0.37 | 0.00 |
| A_52_P502919 | AK134372  | Ahdc1   | 230793 | AT hook, DNA binding motif, containing 1                | -1.66 | 0.37 | 0.11 |
| A_51_P291078 | NM_172710 | Sel1l3  | 231238 | sel-1 suppressor of lin-12-like 3 (C. elegans)          | -2.39 | 0.37 | 0.01 |
| A_52_P405994 | NM_175423 | Orai1   | 109305 | ORAI calcium release-activated calcium modulator 1      | -2.52 | 0.37 | 0.00 |
| A_51_P451759 | BC020147  | Rab3il1 | 74760  | RAB3A interacting protein (rabin3)-like 1               | -3.63 | 0.37 | 0.00 |
| A_51_P284244 | NM_025360 | Tmed3   | 66111  | transmembrane emp24 domain containing 3                 | -1.90 | 0.37 | 0.04 |
| A_52_P105249 | NM_027797 | Tmem80  | 71448  | transmembrane protein 80                                | -3.36 | 0.37 | 0.00 |
| A_51_P297778 | NM_194344 | Sh3tc1  | 231147 | SH3 domain and tetratricopeptide repeats 1              | -3.07 | 0.37 | 0.00 |
| A_51_P214087 | NM_007678 | Cebpa   | 12606  | CCAAT/enhancer binding protein (C/EBP), alpha           | -2.87 | 0.37 | 0.00 |
| A_51_P329869 | NM_199011 | Dgkq    | 110524 | diacylglycerol kinase, theta                            | -2.77 | 0.37 | 0.00 |
| A_51_P209225 | NM_133932 | Tada3   | 101206 | transcriptional adaptor 3                               | -2.75 | 0.37 | 0.00 |
| A_51_P130079 | NM_008511 | Lrmp    | 16970  | lymphoid-restricted membrane protein                    | -3.53 | 0.37 | 0.00 |
| A_52_P254470 | XM_619639 | Tns1    | 21961  | tensin 1                                                | -2.73 | 0.36 | 0.00 |
|              |           |         |        | MFNG O-fucosylpeptide 3-beta-N-                         |       |      |      |
| A_51_P231308 | NM_008595 | Mfng    | 17305  | acetylglucosaminyltransferase                           | -3.79 | 0.36 | 0.00 |
| A_51_P417858 | NM_146231 | Zfp825  | 235956 | zinc finger protein 825                                 | -2.96 | 0.36 | 0.00 |

|              |           |           |        |                                                                             |       |      |      |
|--------------|-----------|-----------|--------|-----------------------------------------------------------------------------|-------|------|------|
| A_52_P348720 | NM_028493 | Rhobtb3   | 73296  | Rho-related BTB domain containing 3                                         | -2.88 | 0.36 | 0.00 |
| A_52_P195922 | NM_028274 | Exosc6    | 72544  | exosome component 6                                                         | -3.40 | 0.36 | 0.00 |
| A_52_P400613 | NM_176842 | Tprkb     | 69786  | Tp53rk binding protein                                                      | -3.00 | 0.36 | 0.00 |
| A_51_P459944 | NM_011545 | Tcf21     | 21412  | transcription factor 21                                                     | -2.68 | 0.36 | 0.00 |
| A_51_P205968 | NM_026912 | Snx15     | 69024  | sorting nexin 15                                                            | -3.29 | 0.36 | 0.00 |
| A_52_P677220 | NM_016683 | Zkscan5   | 22757  | zinc finger with KRAB and SCAN domains 5                                    | -3.12 | 0.36 | 0.00 |
| A_51_P252784 | NM_026883 | 1500011H2 | 68948  | RIKEN cDNA 1500011H22 gene                                                  | -3.31 | 0.36 | 0.00 |
| A_52_P600518 | NM_001077 | Tsc22d3   | 14605  | TSC22 domain family, member 3                                               | -1.29 | 0.36 | 0.46 |
| A_52_P383753 | NM_001039 | Tom1l2    | 216810 | target of myb1-like 2 (chicken)                                             | -3.39 | 0.36 | 0.00 |
| A_51_P371522 | NM_172562 | Tada2a    | 217031 | transcriptional adaptor 2A                                                  | -3.43 | 0.36 | 0.00 |
| A_51_P102257 | AK053112  | Tns1      | 21961  | tensin 1                                                                    | -2.41 | 0.36 | 0.00 |
| A_51_P224564 | NM_176833 | Ppm1f     | 68606  | protein phosphatase 1F (PP2C domain containing)                             | -3.49 | 0.36 | 0.00 |
| A_51_P106059 | NM_009423 | Traf4     | 22032  | TNF receptor associated factor 4                                            | -2.79 | 0.36 | 0.00 |
| A_51_P417725 | NM_008841 | Pik3r2    | 18709  | phosphatidylinositol 3-kinase, regulatory subunit, polypeptide 2 (p85 beta) | -3.29 | 0.36 | 0.00 |
| A_52_P512301 | NM_019479 | Hes6      | 55927  | hairy and enhancer of split 6 (Drosophila)                                  | -1.86 | 0.36 | 0.04 |
| A_51_P120024 | NM_001008 | Pde2a     | 207728 | phosphodiesterase 2A, cGMP-stimulated                                       | -2.31 | 0.36 | 0.01 |
| A_51_P300572 | NM_009579 | Slc30a1   | 22782  | solute carrier family 30 (zinc transporter), member 1                       | -2.97 | 0.36 | 0.00 |
| A_51_P466253 | NM_144913 | Mepce     | 231803 | methylphosphate capping enzyme                                              | -2.98 | 0.36 | 0.00 |
| A_52_P546228 | NM_019721 | Mettl3    | 56335  | methyltransferase like 3                                                    | -3.47 | 0.36 | 0.00 |
| A_51_P474188 | NM_198942 | Dhx57     | 106794 | DEAH (Asp-Glu-Ala-Asp/His) box polypeptide 57                               | -3.31 | 0.36 | 0.00 |
| A_52_P540462 | NM_001076 | 1810012P1 | 66274  | RIKEN cDNA 1810012P15 gene                                                  | -3.34 | 0.36 | 0.00 |
| A_51_P405565 | NM_010830 | Msh6      | 17688  | mutS homolog 6 (E. coli)                                                    | -3.32 | 0.36 | 0.00 |
| A_51_P460890 | NM_009059 | Rgl2      | 19732  | ral guanine nucleotide dissociation stimulator-like 2                       | -3.56 | 0.36 | 0.00 |
| A_52_P235954 | NM_145505 | Fam160b1  | 226252 | family with sequence similarity 160, member B1                              | -2.61 | 0.36 | 0.00 |
| A_51_P114563 | NM_177370 | Rhbdd3    | 279766 | rhomboid domain containing 3                                                | -3.22 | 0.36 | 0.00 |
| A_51_P331090 | NM_134126 | Ift140    | 106633 | intraflagellar transport 140 homolog (Chlamydomonas)                        | -3.46 | 0.36 | 0.00 |
| A_52_P381418 | NM_021435 | Slc35b4   | 58246  | solute carrier family 35, member B4                                         | -3.16 | 0.36 | 0.00 |
| A_52_P623538 | NM_008999 | Rab23     | 19335  | RAB23, member RAS oncogene family                                           | -2.93 | 0.36 | 0.00 |
| A_51_P455416 | NM_013871 | Mapk12    | 29857  | mitogen-activated protein kinase 12                                         | -3.39 | 0.36 | 0.00 |

|              |           |           |        |                                                                                                                        |       |      |      |
|--------------|-----------|-----------|--------|------------------------------------------------------------------------------------------------------------------------|-------|------|------|
| A_51_P515965 | NM_008685 | Nfe2      | 18022  | nuclear factor, erythroid derived 2                                                                                    | -1.81 | 0.36 | 0.05 |
| A_52_P347847 | BC035522  | AU022252  | 230696 | expressed sequence AU022252                                                                                            | -3.20 | 0.36 | 0.00 |
| A_51_P214825 | NM_011959 | Orc5l     | 26429  | origin recognition complex, subunit 5-like ( <i>S. cerevisiae</i> ) amyotrophic lateral sclerosis 2 (juvenile) homolog | -1.84 | 0.36 | 0.04 |
| A_52_P276776 | NM_028717 | Als2      | 74018  | (human)                                                                                                                | -2.67 | 0.36 | 0.00 |
| A_52_P947926 | AK083235  | Agap1     | 347722 | ArfGAP with GTPase domain, ankyrin repeat and PH domain 1                                                              | -2.91 | 0.36 | 0.00 |
| A_52_P179698 | NM_025412 | Pycrl     | 66194  | pyrroline-5-carboxylate reductase-like                                                                                 | -3.02 | 0.36 | 0.00 |
| A_52_P175376 | AK086294  | Tcfcp2l1  | 81879  | transcription factor CP2-like 1                                                                                        | -2.83 | 0.36 | 0.00 |
| A_51_P220343 | NM_018865 | Wisp1     | 22402  | WNT1 inducible signaling pathway protein 1                                                                             | -2.62 | 0.36 | 0.00 |
| A_51_P504624 | NM_133221 | Slc24a6   | 170756 | solute carrier family 24 (sodium/potassium/calcium exchanger), member 6                                                | -1.56 | 0.36 | 0.15 |
| A_51_P491095 | NM_028986 | Gzf1      | 74533  | GDNF-inducible zinc finger protein 1                                                                                   | -2.54 | 0.36 | 0.00 |
| A_51_P246744 | NM_021435 | Slc35b4   | 58246  | solute carrier family 35, member B4                                                                                    | -3.33 | 0.36 | 0.00 |
| A_51_P199993 | NM_021896 | Gucy1a3   | 60596  | guanylate cyclase 1, soluble, alpha 3                                                                                  | -2.64 | 0.36 | 0.00 |
| A_51_P249051 | NM_133705 | Pycr2     | 69051  | pyrroline-5-carboxylate reductase family, member 2                                                                     | -2.54 | 0.36 | 0.00 |
| A_52_P869483 | NM_019402 | Pabpn1    | 54196  | poly(A) binding protein, nuclear 1                                                                                     | -2.88 | 0.36 | 0.00 |
| A_52_P123400 | NM_027269 | 1110034A2 | 109065 | RIKEN cDNA 1110034A24 gene                                                                                             | -3.58 | 0.36 | 0.00 |
| A_51_P451275 | NM_178723 | Zfp385b   | 241494 | zinc finger protein 385B                                                                                               | -1.91 | 0.36 | 0.04 |
| A_52_P484691 | NM_026246 | Mrpl49    | 18120  | mitochondrial ribosomal protein L49                                                                                    | -3.21 | 0.36 | 0.00 |
| A_52_P670850 | AK008732  | Mcoln1    | 94178  | mucolipin 1                                                                                                            | -2.55 | 0.36 | 0.00 |
| A_51_P408100 | NM_008011 | Fgfr4     | 14186  | fibroblast growth factor receptor 4                                                                                    | -3.21 | 0.36 | 0.00 |
| A_51_P284898 | NM_011418 | Smarca1   | 20587  | SWI/SNF related, matrix associated, actin dependent regulator of chromatin, subfamily b, member 1                      | -3.40 | 0.36 | 0.00 |
| A_51_P426246 | NM_028301 | Anks3     | 72615  | ankyrin repeat and sterile alpha motif domain containing 3                                                             | -3.42 | 0.36 | 0.00 |
| A_51_P246215 | NM_027259 | Polr2i    | 69920  | polymerase (RNA) II (DNA directed) polypeptide I                                                                       | -3.03 | 0.36 | 0.00 |
| A_51_P321531 | AF479672  | Purg      | 75029  | purine-rich element binding protein G                                                                                  | -3.01 | 0.36 | 0.00 |
| A_51_P321820 | NM_026445 | Sumf2     | 67902  | sulfatase modifying factor 2                                                                                           | -3.15 | 0.36 | 0.00 |



|              |           |           |        |                                                                |       |      |      |
|--------------|-----------|-----------|--------|----------------------------------------------------------------|-------|------|------|
| A_52_P655084 | NM_001042 | Tbc1d17   | 233204 | TBC1 domain family, member 17                                  | -3.12 | 0.36 | 0.00 |
| A_52_P552547 | AK039760  | 1110054M  | 68841  | RIKEN cDNA 1110054M08 gene                                     | -2.04 | 0.36 | 0.02 |
| A_51_P461475 | NM_007881 | Atn1      | 13498  | atrophin 1                                                     | -3.77 | 0.36 | 0.00 |
| A_52_P499980 | NM_146135 | Pias3     | 229615 | protein inhibitor of activated STAT 3                          | -2.30 | 0.36 | 0.01 |
| A_52_P640413 | NM_145580 | Tmem149   | 101883 | transmembrane protein 149                                      | -2.47 | 0.36 | 0.00 |
| A_52_P477785 | NM_177016 | Slc17a4   | 319848 | solute carrier family 17 (sodium phosphate), member 4          | -2.89 | 0.36 | 0.00 |
| A_52_P506984 | BC015294  | Glyat     | 107146 | glycine-N-acyltransferase                                      | -3.13 | 0.36 | 0.00 |
| A_51_P162116 | NM_177878 | Mblac1    | 330216 | metallo-beta-lactamase domain containing 1                     | -2.69 | 0.36 | 0.00 |
| A_51_P518503 | NM_011385 | Ski       | 20481  | ski sarcoma viral oncogene homolog (avian)                     | -3.54 | 0.36 | 0.00 |
| A_51_P196113 | NM_019945 | Mast1     | 56527  | microtubule associated serine/threonine kinase 1               | -3.23 | 0.36 | 0.00 |
| A_51_P180492 | NM_016974 | Dbp       | 13170  | D site albumin promoter binding protein                        | -2.10 | 0.36 | 0.01 |
| A_51_P204564 | U27838    | Caprin1   | 53872  | cell cycle associated protein 1                                | -2.38 | 0.36 | 0.01 |
| A_51_P185882 | NM_201362 | Ccdc68    | 381175 | coiled-coil domain containing 68                               | -3.38 | 0.36 | 0.00 |
| A_52_P755474 | BB293566  | NA        | NA     | NA                                                             | -1.96 | 0.36 | 0.03 |
| A_51_P142334 | NM_010567 | Inpp1     | 16332  | inositol polyphosphate phosphatase-like 1                      | -3.13 | 0.36 | 0.00 |
| A_51_P452506 | NM_145538 | Tmem189   | 407243 | transmembrane protein 189                                      | -2.95 | 0.36 | 0.00 |
| A_52_P177699 | NM_009330 | Hnf1b     | 21410  | HNF1 homeobox B                                                | -2.99 | 0.36 | 0.00 |
| A_52_P545393 | NM_011862 | Pacsin2   | 23970  | protein kinase C and casein kinase substrate in neurons 2      | -2.53 | 0.36 | 0.00 |
| A_52_P481221 | NM_029389 | Fam35a    | 75698  | family with sequence similarity 35, member A                   | -2.65 | 0.36 | 0.00 |
| A_51_P429040 | NM_146119 | Fam129b   | 227737 | family with sequence similarity 129, member B                  | -2.00 | 0.35 | 0.02 |
| A_52_P669996 | NM_029239 | Prkd3     | 75292  | protein kinase D3                                              | -2.71 | 0.35 | 0.00 |
| A_51_P121900 | NM_145970 | Cc2d1a    | 212139 | coiled-coil and C2 domain containing 1A                        | -3.21 | 0.35 | 0.00 |
| A_51_P116699 | NM_025905 | Ttc23     | 67009  | tetratricopeptide repeat domain 23                             | -3.04 | 0.35 | 0.00 |
| A_52_P218271 | AK080508  | A730063M  | 320368 | RIKEN cDNA A730063M14 gene                                     | -2.98 | 0.35 | 0.00 |
| A_51_P341255 | AK078885  | AI842136  | 102596 | expressed sequence AI842136                                    | -3.60 | 0.35 | 0.00 |
| A_52_P16136  | AK017596  | D10Bwg10' | 52902  | DNA segment, Chr 10, Brigham & Women's Genetics 1070 expressed | -2.32 | 0.35 | 0.01 |
| A_51_P408329 | AK089570  | NA        | NA     | NA                                                             | -2.89 | 0.35 | 0.00 |
| A_51_P368543 | NM_022419 | Abhd8     | 64296  | abhydrolase domain containing 8                                | -2.94 | 0.35 | 0.00 |
| A_52_P284495 | NM_026153 | Ankrd33b  | 67434  | ankyrin repeat domain 33B                                      | -1.95 | 0.35 | 0.03 |
| A_51_P234303 | D00812    | Rpa2      | 19891  | replication protein A2                                         | -3.36 | 0.35 | 0.00 |

|              |           |           |        |                                                                        |       |      |      |
|--------------|-----------|-----------|--------|------------------------------------------------------------------------|-------|------|------|
| A_51_P310850 | AK084512  | Plekha6   | 240753 | pleckstrin homology domain containing, family A member 6               | -2.38 | 0.35 | 0.01 |
| A_51_P197043 | NM_028875 | Xrcc3     | 74335  | X-ray repair complementing defective repair in Chinese hamster cells 3 | -3.37 | 0.35 | 0.00 |
| A_51_P234308 | NM_011284 | Rpa2      | 19891  | replication protein A2                                                 | -3.45 | 0.35 | 0.00 |
| A_51_P223583 | NM_134257 | Rgs3      | 50780  | regulator of G-protein signaling 3                                     | -2.71 | 0.35 | 0.00 |
| A_51_P433837 | NM_001033 | Slc22a23  | 73102  | solute carrier family 22, member 23                                    | -3.07 | 0.35 | 0.00 |
| A_52_P506516 | NM_008010 | Fgfr3     | 14184  | fibroblast growth factor receptor 3                                    | -3.13 | 0.35 | 0.00 |
| A_52_P615401 | NM_011906 | Tpra1     | 24100  | transmembrane protein, adipocyte associated 1                          | -2.73 | 0.35 | 0.00 |
| A_52_P355075 | NM_139154 | Rab40c    | 224624 | Rab40c, member RAS oncogene family                                     | -3.61 | 0.35 | 0.00 |
| A_52_P290211 | AK040611  | Meis2     | 17536  | Meis homeobox 2                                                        | -2.80 | 0.35 | 0.00 |
| A_52_P320202 | AK220477  | Nhlrc3    | 212114 | NHL repeat containing 3                                                | -3.17 | 0.35 | 0.00 |
| A_51_P365903 | NM_026187 | Ankzf1    | 52231  | ankyrin repeat and zinc finger domain containing 1                     | -3.56 | 0.35 | 0.00 |
| A_51_P303739 | NM_178928 | Afap111   | 106877 | actin filament associated protein 1-like 1                             | -3.15 | 0.35 | 0.00 |
| A_51_P437897 | NM_025319 | 0610009B2 | 66050  | RIKEN cDNA 0610009B22 gene                                             | -2.51 | 0.35 | 0.00 |
| A_52_P197627 | NM_009471 | Umps      | 22247  | uridine monophosphate synthetase                                       | -3.15 | 0.35 | 0.00 |
| A_52_P635271 | NM_201646 | Btbd6     | 399566 | BTB (POZ) domain containing 6                                          | -3.13 | 0.35 | 0.00 |
| A_52_P672532 | NM_183251 | 1810020D1 | 166273 | RIKEN cDNA 1810020D17 gene                                             | -2.39 | 0.35 | 0.01 |
| A_51_P362538 | XM_001004 | Syde2     | 214804 | synapse defective 1, Rho GTPase, homolog 2 (C. elegans)                | -3.44 | 0.35 | 0.00 |
| A_51_P150912 | NM_011497 | Aurka     | 20878  | aurora kinase A                                                        | -2.46 | 0.35 | 0.00 |
| A_51_P383800 | BC050890  | Fancg     | 60534  | Fanconi anemia, complementation group G                                | -3.17 | 0.35 | 0.00 |
| A_51_P316801 | NM_146039 | Wdr60     | 217935 | WD repeat domain 60                                                    | -3.17 | 0.35 | 0.00 |
| A_52_P633410 | NM_020590 | Gabarapl1 | 57436  | gamma-aminobutyric acid (GABA) A receptor-associated protein-like 1    | -3.64 | 0.35 | 0.00 |
| A_52_P884092 | AK082796  | C330020G1 | 109343 | RIKEN cDNA C330020G15 gene                                             | -3.36 | 0.35 | 0.00 |
| A_51_P237915 | NM_146258 | Stard13   | 243362 | StAR-related lipid transfer (START) domain containing 13               | -3.14 | 0.35 | 0.00 |
| A_52_P482203 | NM_199033 | Tsen2     | 381802 | tRNA splicing endonuclease 2 homolog (S. cerevisiae)                   | -2.90 | 0.35 | 0.00 |
| A_51_P199608 | NM_178869 | Ttll1     | 319953 | tubulin tyrosine ligase-like 1                                         | -3.50 | 0.35 | 0.00 |
| A_51_P142421 | NM_138683 | Rspo1     | 192199 | R-spondin homolog (Xenopus laevis)                                     | -1.79 | 0.35 | 0.06 |
| A_52_P135022 | NM_176831 | Ppcdc     | 66812  | phosphopantothenoylecysteine decarboxylase                             | -3.13 | 0.35 | 0.00 |

|              |           |           |        |                                                                                                    |       |      |      |
|--------------|-----------|-----------|--------|----------------------------------------------------------------------------------------------------|-------|------|------|
| A_51_P507942 | NM_029097 | Atp13a2   | 74772  | ATPase type 13A2                                                                                   | -3.55 | 0.35 | 0.00 |
| A_52_P343326 | NM_172866 | Rgp1      | 242406 | RGP1 retrograde golgi transport homolog ( <i>S. cerevisiae</i> )                                   | -3.50 | 0.35 | 0.00 |
| A_51_P318804 | NM_029031 | Shpk      | 74637  | sedoheptulokinase                                                                                  | -2.89 | 0.35 | 0.00 |
| A_51_P109050 | NM_023824 | Paqr4     | 76498  | progesterin and adipoQ receptor family member IV                                                   | -3.34 | 0.35 | 0.00 |
| A_51_P278034 | NM_027356 | Ufsp1     | 70240  | UFM1-specific peptidase 1                                                                          | -3.68 | 0.35 | 0.00 |
| A_51_P211968 | NM_025304 | Lcmt1     | 30949  | leucine carboxyl methyltransferase 1                                                               | -3.23 | 0.35 | 0.00 |
| A_51_P462556 | AK143982  | Gm10658   | 1E+08  | predicted gene 10658                                                                               | -3.34 | 0.35 | 0.00 |
| A_51_P211822 | NM_001013 | Neurl4    | 216860 | neuralized homolog 4 ( <i>Drosophila</i> )                                                         | -3.02 | 0.35 | 0.00 |
| A_52_P130952 | NM_145434 | Nr1d1     | 217166 | nuclear receptor subfamily 1, group D, member 1                                                    | -2.87 | 0.35 | 0.00 |
| A_52_P475080 | NM_029847 | Arsk      | 77041  | arylsulfatase K                                                                                    | -2.99 | 0.35 | 0.00 |
| A_52_P306065 | AK020957  | Nuak1     | 77976  | NUAK family, SNF1-like kinase, 1                                                                   | -2.68 | 0.35 | 0.00 |
| A_52_P75584  | AK044272  | NA        | NA     | NA                                                                                                 | -1.87 | 0.35 | 0.04 |
| A_52_P78423  | AK039175  | 5330421C1 | 78279  | RIKEN cDNA 5330421C15 gene                                                                         | -3.20 | 0.35 | 0.00 |
| A_51_P255142 | NM_016916 | Blcap     | 53619  | bladder cancer associated protein homolog (human)                                                  | -3.36 | 0.35 | 0.00 |
| A_52_P539161 | NM_021557 | Rdh11     | 17252  | retinol dehydrogenase 11                                                                           | -3.12 | 0.35 | 0.00 |
| A_52_P11388  | NM_008149 | Gpam      | 14732  | glycerol-3-phosphate acyltransferase, mitochondrial                                                | -2.15 | 0.35 | 0.01 |
| A_51_P243194 | NM_178612 | Cnpy4     | 66455  | canopy 4 homolog (zebrafish)                                                                       | -3.01 | 0.35 | 0.00 |
| A_51_P271591 | AK090305  | Arl10     | 56795  | ADP-ribosylation factor-like 10                                                                    | -2.79 | 0.35 | 0.00 |
| A_52_P647906 | XM_986527 | NA        | NA     | NA                                                                                                 | -2.12 | 0.35 | 0.01 |
| A_52_P89425  | NM_008787 | Pcnt      | 18541  | pericentrin (kendrin)                                                                              | -3.88 | 0.35 | 0.00 |
| A_51_P387400 | NM_026535 | Serpina12 | 68054  | serine (or cysteine) peptidase inhibitor, clade A (alpha-1 antiproteinase, antitrypsin), member 12 | -1.48 | 0.35 | 0.20 |
| A_52_P202044 | AK034200  | 933016201 | 493800 | cDNA RIKEN 9330162012 gene                                                                         | -3.28 | 0.35 | 0.00 |
| A_51_P291304 | BG970498  | NA        | NA     | NA                                                                                                 | -2.92 | 0.35 | 0.00 |
| A_51_P276321 | BC059842  | Szt2      | 230676 | seizure threshold 2                                                                                | -3.69 | 0.35 | 0.00 |
| A_52_P297032 | NM_029688 | Srxn1     | 76650  | sulfiredoxin 1 homolog ( <i>S. cerevisiae</i> )                                                    | -3.48 | 0.35 | 0.00 |
| A_51_P356355 | AK017654  | Cds2      | 110911 | CDP-diacylglycerol synthase (phosphatidate cytidyltransferase) 2                                   | -2.83 | 0.34 | 0.00 |
| A_52_P29879  | NM_054046 | Def8      | 23854  | differentially expressed in FDCP 8                                                                 | -3.69 | 0.34 | 0.00 |
| A_52_P595854 | NM_026078 | Pigc      | 67292  | phosphatidylinositol glycan anchor biosynthesis, class C                                           | -2.78 | 0.34 | 0.00 |

|               |           |            |        |                                                                                                      |       |      |      |
|---------------|-----------|------------|--------|------------------------------------------------------------------------------------------------------|-------|------|------|
| A_51_P256323  | AK220156  | Lpin2      | 64898  | lipin 2                                                                                              | -3.28 | 0.34 | 0.00 |
| A_52_P119393  | NM_054082 | Mta3       | 116871 | metastasis associated 3                                                                              | -3.93 | 0.34 | 0.00 |
| A_52_P683225  | AK039665  | Taok3      | 330177 | TAO kinase 3                                                                                         | -3.06 | 0.34 | 0.00 |
| A_51_P228295  | NM_001001 | Mpzl1      | 68481  | myelin protein zero-like 1                                                                           | -4.09 | 0.34 | 0.00 |
| A_51_P337125  | NM_010566 | Inpp5d     | 16331  | inositol polyphosphate-5-phosphatase D<br>carbamoyl-phosphate synthetase 2, aspartate                | -3.80 | 0.34 | 0.00 |
| A_52_P16098   | NM_023525 | Cad        | 69719  | transcarbamylase, and dihydroorotase                                                                 | -2.71 | 0.34 | 0.00 |
| A_51_P111259  | NM_026373 | Cdk2ap2    | 52004  | CDK2-associated protein 2                                                                            | -3.29 | 0.34 | 0.00 |
| A_51_P332217  | NM_181418 | Ushbp1     | 234395 | Usher syndrome 1C binding protein 1                                                                  | -2.80 | 0.34 | 0.00 |
| A_52_P124320  | AK122247  | Khynyn     | 219094 | KH and NYN domain containing                                                                         | -2.84 | 0.34 | 0.00 |
| A_52_P340178  | NM_178741 | Klhl8      | 246293 | kelch-like 8 (Drosophila)                                                                            | -3.29 | 0.34 | 0.00 |
| A_51_P122085  | NM_028846 | Usp20      | 74270  | ubiquitin specific peptidase 20                                                                      | -2.59 | 0.34 | 0.00 |
| A_52_P678942  | AK147538  | Plxnb2     | 140570 | plexin B2                                                                                            | -2.22 | 0.34 | 0.01 |
| A_51_P487298  | NM_139307 | Vasn       | 246154 | vasorin                                                                                              | -2.60 | 0.34 | 0.00 |
| A_52_P644210  | AK019026  | Cul9       | 78309  | cullin 9                                                                                             | -2.97 | 0.34 | 0.00 |
| A_51_P185332  | AK147270  | 1700020I14 | 66602  | RIKEN cDNA 1700020I14 gene                                                                           | -3.40 | 0.34 | 0.00 |
| A_51_P357759  | NM_008876 | Plid2      | 18806  | phospholipase D2                                                                                     | -2.96 | 0.34 | 0.00 |
| A_51_P256957  | NM_146033 | Ankmy2     | 217473 | ankyrin repeat and MYND domain containing 2                                                          | -4.00 | 0.34 | 0.00 |
| A_51_P446825  | NM_176952 | 6430573F1  | 319582 | RIKEN cDNA 6430573F11 gene                                                                           | -2.14 | 0.34 | 0.01 |
| A_52_P48976   | AK033890  | Il17rc     | 171095 | interleukin 17 receptor C                                                                            | -2.13 | 0.34 | 0.01 |
| A_51_P143915  | NM_025607 | Rnf181     | 66510  | ring finger protein 181                                                                              | -3.76 | 0.34 | 0.00 |
| A_51_P264064  | NM_016692 | Incenp     | 16319  | inner centromere protein                                                                             | -2.91 | 0.34 | 0.00 |
| A_52_P472319  | AK147513  | Plxnd1     | 67784  | plexin D1                                                                                            | -2.95 | 0.34 | 0.00 |
| A_52_P193941  | NM_027987 | Cd300lg    | 52685  | CD300 antigen like family member G                                                                   | -2.98 | 0.34 | 0.00 |
| A_51_P113274  | NM_176785 | Hps6       | 20170  | Hermansky-Pudlak syndrome 6                                                                          | -3.60 | 0.34 | 0.00 |
| A_52_P491842  | NM_023336 | Brd3       | 67382  | bromodomain containing 3                                                                             | -3.55 | 0.34 | 0.00 |
| A_52_P584188  | NM_008043 | Frat1      | 14296  | frequently rearranged in advanced T-cell lymphomas                                                   | -2.82 | 0.34 | 0.00 |
| A_51_P184197  | NM_031878 | Smarcd2    | 83796  | SWI/SNF related, matrix associated, actin dependent<br>regulator of chromatin, subfamily d, member 2 | -3.67 | 0.34 | 0.00 |
| A_51_P496309  | NM_001024 | Rfx4       | 71137  | regulatory factor X, 4 (influences HLA class II expression)                                          | -2.42 | 0.34 | 0.00 |
| A_52_P1189140 | AK140790  | NA         | NA     | NA                                                                                                   | -1.71 | 0.34 | 0.07 |

|              |           |                 |        |                                                                                                       |       |      |      |
|--------------|-----------|-----------------|--------|-------------------------------------------------------------------------------------------------------|-------|------|------|
| A_51_P429366 | NM_019479 | Hes6            | 55927  | hairy and enhancer of split 6 (Drosophila)                                                            | -2.13 | 0.34 | 0.01 |
| A_51_P399853 | NM_133218 | Zfp704          | 170753 | zinc finger protein 704                                                                               | -2.96 | 0.34 | 0.00 |
| A_51_P325501 | NM_053250 | Crip3           | 114570 | cysteine-rich protein 3                                                                               | -3.46 | 0.34 | 0.00 |
| A_52_P11833  | AK157673  | Opa3            | 403187 | optic atrophy 3 (human)                                                                               | -3.62 | 0.34 | 0.00 |
| A_51_P229925 | NM_021715 | Chst7           | 60322  | carbohydrate (N-acetylglucosamino) sulfotransferase 7                                                 | -3.55 | 0.34 | 0.00 |
| A_51_P314153 | NM_001025 | Nr2c2ap         | 75692  | nuclear receptor 2C2-associated protein<br>nudix (nucleoside diphosphate linked moiety X)-type        | -3.58 | 0.34 | 0.00 |
| A_52_P492601 | NM_153136 | Nudt18          | 213484 | motif 18                                                                                              | -2.53 | 0.34 | 0.00 |
| A_51_P329512 | NM_001013 | Rreb1           | 68750  | ras responsive element binding protein 1                                                              | -2.33 | 0.34 | 0.01 |
| A_51_P209666 | AK014617  | Atl3            | 109168 | atlastin GTPase 3                                                                                     | -3.34 | 0.34 | 0.00 |
| A_51_P459070 | NM_024251 | Aplf            | 72103  | aprataxin and PNKP like factor                                                                        | -3.62 | 0.34 | 0.00 |
| A_51_P185247 | NM_145741 | Gdf10           | 14560  | growth differentiation factor 10                                                                      | -2.89 | 0.34 | 0.00 |
| A_51_P364391 | NM_175184 | Fam125b         | 72543  | family with sequence similarity 125, member B                                                         | -4.09 | 0.34 | 0.00 |
| A_51_P503797 | NM_178611 | Lair1           | 52855  | leukocyte-associated Ig-like receptor 1<br>methylmalonic aciduria (cobalamin deficiency) type B       | -3.80 | 0.34 | 0.00 |
| A_52_P111830 | NM_029956 | Mmab            | 77697  | homolog (human)                                                                                       | -2.74 | 0.34 | 0.00 |
| A_51_P450536 | NM_028170 | 1700030K072254  |        | RIKEN cDNA 1700030K09 gene                                                                            | -3.44 | 0.34 | 0.00 |
| A_52_P215798 | NM_025687 | Tex12           | 66654  | testis expressed gene 12                                                                              | -3.20 | 0.34 | 0.00 |
| A_51_P376321 | NM_145828 | Xylt2           | 217119 | xylosyltransferase II                                                                                 | -3.39 | 0.34 | 0.00 |
| A_52_P54280  | NM_023341 | Cabc1           | 67426  | chaperone, ABC1 activity of bc1 complex like (S. pombe)<br>minichromosome maintenance deficient 7 (S. | -2.18 | 0.34 | 0.01 |
| A_51_P165704 | NM_008568 | Mcm7            | 17220  | cerevisiae)                                                                                           | -3.76 | 0.34 | 0.00 |
| A_51_P392303 | NM_010733 | Lrrn3           | 16981  | leucine rich repeat protein 3, neuronal                                                               | -2.94 | 0.34 | 0.00 |
| A_51_P480881 | NM_021513 | Thap11          | 59016  | THAP domain containing 11                                                                             | -3.14 | 0.34 | 0.00 |
| A_52_P185044 | NM_197985 | Adipor2         | 68465  | adiponectin receptor 2                                                                                | -2.75 | 0.34 | 0.00 |
| A_52_P677891 | BC034069  | Fam174b         | 1E+08  | family with sequence similarity 174, member B                                                         | -2.87 | 0.34 | 0.00 |
| A_51_P406126 | AK019577  | 4930414L2       | 78108  | RIKEN cDNA 4930414L22 gene                                                                            | -3.59 | 0.34 | 0.00 |
| A_51_P270899 | NM_009561 | Zfp61           | 22719  | zinc finger protein 61                                                                                | -3.61 | 0.34 | 0.00 |
| A_51_P356012 | NM_027949 | Phf7            | 71838  | PHD finger protein 7                                                                                  | -3.10 | 0.34 | 0.00 |
| A_51_P454447 | NM_028505 | 1700040I0:73327 |        | RIKEN cDNA 1700040I03 gene                                                                            | -3.82 | 0.34 | 0.00 |
| A_51_P293706 | NM_025479 | 2810021B0       | 66308  | RIKEN cDNA 2810021B07 gene                                                                            | -3.37 | 0.34 | 0.00 |
| A_51_P369971 | AK172241  | 5730455O1       | 70567  | RIKEN cDNA 5730455O13 gene                                                                            | -3.08 | 0.34 | 0.00 |

|              |           |           |        |                                                                                                       |       |      |      |
|--------------|-----------|-----------|--------|-------------------------------------------------------------------------------------------------------|-------|------|------|
| A_51_P211573 | NM_181400 | Wdr47     | 99512  | WD repeat domain 47                                                                                   | -3.18 | 0.34 | 0.00 |
| A_52_P679380 | AK209324  | NA        | NA     | NA                                                                                                    | -3.66 | 0.34 | 0.00 |
| A_51_P130374 | NM_013690 | Tek       | 21687  | endothelial-specific receptor tyrosine kinase                                                         | -2.30 | 0.34 | 0.01 |
| A_52_P397204 | NM_007783 | Csk       | 12988  | c-src tyrosine kinase                                                                                 | -3.17 | 0.34 | 0.00 |
| A_51_P290986 | NM_007856 | Dhcr7     | 13360  | 7-dehydrocholesterol reductase                                                                        | -3.12 | 0.34 | 0.00 |
| A_51_P440047 | NM_173752 | 1110067D2 | 216551 | RIKEN cDNA 1110067D22 gene                                                                            | -2.23 | 0.34 | 0.01 |
| A_51_P305508 | NM_181988 | Rerg      | 232441 | RAS-like, estrogen-regulated, growth-inhibitor                                                        | -3.13 | 0.33 | 0.00 |
| A_52_P297731 | NM_011665 | Ube2i     | 22196  | ubiquitin-conjugating enzyme E2I                                                                      | -3.22 | 0.33 | 0.00 |
| A_52_P370203 | NM_021878 | Jarid2    | 16468  | jumonji, AT rich interactive domain 2                                                                 | -4.07 | 0.33 | 0.00 |
| A_52_P403398 | AK090147  | lhh       | 16147  | Indian hedgehog                                                                                       | -3.18 | 0.33 | 0.00 |
| A_51_P311905 | AK011270  | 261000211 | 72341  | RIKEN cDNA 2610002117                                                                                 | -3.45 | 0.33 | 0.00 |
| A_51_P507509 | NM_008376 | Gimap1    | 16205  | GTPase, IMAP family member 1                                                                          | -3.68 | 0.33 | 0.00 |
| A_52_P259335 | BC060651  | Fkbp15    | 338355 | FK506 binding protein 15                                                                              | -3.11 | 0.33 | 0.00 |
| A_51_P145662 | NM_029465 | Clec4g    | 75863  | C-type lectin domain family 4, member g                                                               | -2.34 | 0.33 | 0.01 |
| A_51_P489108 | NM_153391 | Wdr19     | 213081 | WD repeat domain 19                                                                                   | -4.27 | 0.33 | 0.00 |
| A_51_P450487 | NM_009270 | Sqle      | 20775  | squalene epoxidase                                                                                    | -2.56 | 0.33 | 0.00 |
| A_52_P669005 | NM_023624 | Lrat      | 79235  | lecithin-retinol acyltransferase (phosphatidylcholine-retinol-O-acyltransferase)                      | -3.29 | 0.33 | 0.00 |
| A_51_P194377 | NM_021567 | Pcbp4     | 59092  | poly(rC) binding protein 4                                                                            | -3.58 | 0.33 | 0.00 |
| A_51_P119633 | NM_008043 | Frat1     | 14296  | frequently rearranged in advanced T-cell lymphomas amyotrophic lateral sclerosis 2 (juvenile) homolog | -2.83 | 0.33 | 0.00 |
| A_52_P311297 | NM_028717 | Als2      | 74018  | (human)                                                                                               | -3.55 | 0.33 | 0.00 |
| A_51_P128987 | NM_008012 | Akr1b8    | 14187  | aldo-keto reductase family 1, member B8                                                               | -2.71 | 0.33 | 0.00 |
| A_52_P438084 | NM_008860 | Prkcz     | 18762  | protein kinase C, zeta                                                                                | -2.78 | 0.33 | 0.00 |
| A_51_P109741 | AK155405  | Neil1     | 72774  | nei endonuclease VIII-like 1 (E. coli)                                                                | -4.28 | 0.33 | 0.00 |
| A_51_P484919 | NM_172551 | Polrmt    | 216151 | polymerase (RNA) mitochondrial (DNA directed)                                                         | -3.44 | 0.33 | 0.00 |
| A_51_P508411 | NM_177856 | E130311K1 | 329659 | RIKEN cDNA E130311K13 gene                                                                            | -3.26 | 0.33 | 0.00 |
| A_51_P228974 | NM_025671 | Ogfod2    | 66627  | 2-oxoglutarate and iron-dependent oxygenase domain containing 2                                       | -3.20 | 0.33 | 0.00 |
| A_51_P403578 | AK007907  | 1810059H2 | 69820  | RIKEN cDNA 1810059H22 gene                                                                            | -2.97 | 0.33 | 0.00 |
| A_51_P132849 | NM_178597 | Camk2g    | 12325  | calcium/calmodulin-dependent protein kinase II gamma                                                  | -3.56 | 0.33 | 0.00 |
| A_52_P556710 | NM_025708 | Tmem186   | 66690  | transmembrane protein 186                                                                             | -3.66 | 0.33 | 0.00 |

|              |           |             |        |                                                              |       |      |      |
|--------------|-----------|-------------|--------|--------------------------------------------------------------|-------|------|------|
|              |           |             |        | guanine nucleotide binding protein (G protein), gamma        |       |      |      |
| A_51_P383774 | NM_010314 | Gngt1       | 14699  | transducing activity polypeptide 1                           | -2.28 | 0.33 | 0.01 |
| A_51_P172155 | NM_010401 | Hal         | 15109  | histidine ammonia lyase                                      | -3.59 | 0.33 | 0.00 |
| A_52_P390448 | NA        | NA          | NA     | NA                                                           | -3.32 | 0.33 | 0.00 |
| A_52_P376502 | NM_177343 | Camk1d      | 227541 | calcium/calmodulin-dependent protein kinase ID               | -2.46 | 0.33 | 0.00 |
| A_52_P859747 | AK050399  | Gm1381      | 384198 | predicted gene 1381                                          | -2.08 | 0.33 | 0.02 |
| A_52_P506217 | NM_007485 | Rhod        | 11854  | ras homolog gene family, member D                            | -2.56 | 0.33 | 0.00 |
| A_51_P517157 | NM_028766 | Tmem43      | 74122  | transmembrane protein 43                                     | -3.19 | 0.33 | 0.00 |
| A_51_P250445 | NM_020497 | Zfp276      | 57247  | zinc finger protein (C2H2 type) 276                          | -3.68 | 0.33 | 0.00 |
| A_51_P519700 | NM_008624 | Mras        | 17532  | muscle and microspikes RAS                                   | -2.76 | 0.33 | 0.00 |
| A_51_P209996 | M19413    | Tuba-rs1    | 26947  | tubulin alpha, related sequence 1                            | -3.82 | 0.33 | 0.00 |
| A_51_P392705 | NM_009531 | Xpc         | 22591  | xeroderma pigmentosum, complementation group C               | -3.31 | 0.33 | 0.00 |
| A_52_P642879 | NM_145564 | Fbxo21      | 231670 | F-box protein 21                                             | -3.27 | 0.33 | 0.00 |
|              |           |             |        | serine (or cysteine) peptidase inhibitor, clade A (alpha-1   |       |      |      |
| A_51_P131315 | NM_027997 | Serpina9    | 71907  | antiproteinase, antitrypsin), member 9                       | -1.98 | 0.33 | 0.03 |
| A_52_P370473 | BC043039  | Msl1        | 74026  | male-specific lethal 1 homolog (Drosophila)                  | -3.75 | 0.33 | 0.00 |
| A_51_P212038 | NM_133764 | Atp6v0e2    | 76252  | ATPase, H <sup>+</sup> transporting, lysosomal V0 subunit E2 | -2.83 | 0.33 | 0.00 |
| A_51_P222453 | NM_025311 | D14Ertd449e | 66039  | DNA segment, Chr 14, ERATO Doi 449, expressed                | -2.76 | 0.33 | 0.00 |
| A_52_P633550 | AK053579  | Ghr         | 14600  | growth hormone receptor                                      | -2.69 | 0.33 | 0.00 |
| A_51_P348749 | NM_145438 | Llg12       | 217325 | lethal giant larvae homolog 2 (Drosophila)                   | -3.34 | 0.33 | 0.00 |
|              |           |             |        | G protein-coupled receptor, family C, group 5, member        |       |      |      |
| A_52_P405460 | BC008228  | Gprc5c      | 70355  | C                                                            | -2.68 | 0.33 | 0.00 |
| A_51_P126626 | NM_145459 | Zfp503      | 218820 | zinc finger protein 503                                      | -3.30 | 0.33 | 0.00 |
| A_51_P219385 | NM_011383 | Six5        | 20475  | sine oculis-related homeobox 5 homolog (Drosophila)          | -3.19 | 0.33 | 0.00 |
| A_51_P151371 | NM_028316 | Zfp444      | 72667  | zinc finger protein 444                                      | -3.84 | 0.33 | 0.00 |
| A_52_P685021 | NM_021704 | Cxcl12      | 20315  | chemokine (C-X-C motif) ligand 12                            | -2.67 | 0.33 | 0.00 |
| A_51_P226429 | NM_153514 | Rhobtb2     | 246710 | Rho-related BTB domain containing 2                          | -3.96 | 0.33 | 0.00 |
| A_52_P547662 | NM_008772 | P2ry1       | 18441  | purinergic receptor P2Y, G-protein coupled 1                 | -3.44 | 0.33 | 0.00 |
| A_51_P344301 | AK021019  | Svil        | 225115 | supervillin                                                  | -2.88 | 0.33 | 0.00 |
| A_52_P555629 | AK129160  | Zfp862      | 58894  | zinc finger protein 862                                      | -2.78 | 0.33 | 0.00 |
| A_51_P261351 | NM_026246 | Mrpl49      | 18120  | mitochondrial ribosomal protein L49                          | -3.55 | 0.33 | 0.00 |
| A_52_P245415 | AK220161  | AW554918    | 225289 | expressed sequence AW554918                                  | -4.10 | 0.33 | 0.00 |

|              |           |                |        |                                                                                    |       |      |      |
|--------------|-----------|----------------|--------|------------------------------------------------------------------------------------|-------|------|------|
| A_51_P393654 | NM_175514 | Fam171b        | 241520 | family with sequence similarity 171, member B                                      | -3.27 | 0.33 | 0.00 |
| A_52_P94811  | NM_145828 | Xylt2          | 217119 | xylosyltransferase II                                                              | -3.78 | 0.33 | 0.00 |
| A_51_P114634 | NM_173405 | Amz1           | 231842 | archaelysin family metallopeptidase 1                                              | -3.43 | 0.33 | 0.00 |
| A_52_P7147   | NM_175133 | 1110038D168778 |        | RIKEN cDNA 1110038D17 gene                                                         | -2.99 | 0.33 | 0.00 |
| A_52_P261868 | NM_134257 | Rgs3           | 50780  | regulator of G-protein signaling 3                                                 | -2.86 | 0.33 | 0.00 |
| A_51_P116932 | NM_133664 | Lad1           | 16763  | ladinin                                                                            | -2.83 | 0.33 | 0.00 |
| A_52_P64383  | NM_023184 | Klf15          | 66277  | Kruppel-like factor 15                                                             | -2.77 | 0.33 | 0.00 |
| A_51_P280304 | NM_011876 | Twf2           | 23999  | twinfilin, actin-binding protein, homolog 2 (Drosophila)                           | -3.82 | 0.33 | 0.00 |
| A_51_P519696 | NM_008624 | Mras           | 17532  | muscle and microspikes RAS protein kinase C and casein kinase substrate in neurons | -4.25 | 0.33 | 0.00 |
| A_51_P390884 | NM_011862 | Pacsin2        | 23970  | 2                                                                                  | -2.92 | 0.33 | 0.00 |
| A_51_P209736 | NM_153778 | Atoh8          | 71093  | atonal homolog 8 (Drosophila)                                                      | -3.22 | 0.33 | 0.00 |
| A_51_P386389 | NM_025914 | Actr6          | 67019  | ARP6 actin-related protein 6 homolog (yeast)                                       | -3.77 | 0.33 | 0.00 |
| A_51_P288828 | NM_029643 | Gpr172b        | 52710  | G protein-coupled receptor 172B                                                    | -3.34 | 0.33 | 0.00 |
| A_52_P421698 | NM_027816 | Cyp2u1         | 71519  | cytochrome P450, family 2, subfamily u, polypeptide 1                              | -3.35 | 0.32 | 0.00 |
| A_52_P254789 | NM_021296 | Grpel2         | 17714  | GrpE-like 2, mitochondrial                                                         | -2.73 | 0.32 | 0.00 |
| A_52_P378791 | NM_153514 | Rhobtb2        | 246710 | Rho-related BTB domain containing 2                                                | -3.53 | 0.32 | 0.00 |
| A_51_P334490 | NM_172286 | 6430548M08     | 234797 | RIKEN cDNA 6430548M08 gene                                                         | -3.08 | 0.32 | 0.00 |
| A_52_P645862 | NM_177322 | Agtr1a         | 11607  | angiotensin II receptor, type 1a                                                   | -3.57 | 0.32 | 0.00 |
| A_52_P595162 | NM_026573 | Upf3b          | 68134  | UPF3 regulator of nonsense transcripts homolog B (yeast)                           | -4.29 | 0.32 | 0.00 |
| A_51_P304296 | NA        | NA             | NA     | NA                                                                                 | -3.01 | 0.32 | 0.00 |
| A_52_P322544 | NM_198103 | Exoc8          | 102058 | exocyst complex component 8                                                        | -3.64 | 0.32 | 0.00 |
| A_51_P435339 | NM_010149 | Epor           | 13857  | erythropoietin receptor                                                            | -3.13 | 0.32 | 0.00 |
| A_51_P263407 | AK028913  | Itpripl1       | 73338  | inositol 1,4,5-triphosphate receptor interacting protein-like 1                    | -3.23 | 0.32 | 0.00 |
| A_51_P162471 | NM_134081 | Dnajc9         | 108671 | Dnaj (Hsp40) homolog, subfamily C, member 9                                        | -3.57 | 0.32 | 0.00 |
| A_52_P55772  | NM_009325 | Tbxa2r         | 21390  | thromboxane A2 receptor                                                            | -3.44 | 0.32 | 0.00 |
| A_52_P435016 | NM_019572 | Hdac7          | 56233  | histone deacetylase 7                                                              | -3.15 | 0.32 | 0.00 |
| A_52_P184145 | NM_145564 | Fbxo21         | 231670 | F-box protein 21                                                                   | -2.88 | 0.32 | 0.00 |
| A_52_P684402 | NM_013782 | Ptdss2         | 27388  | phosphatidylserine synthase 2                                                      | -3.67 | 0.32 | 0.00 |
| A_52_P499251 | AK020717  | Cryl1          | 68631  | crystallin, lambda 1                                                               | -2.82 | 0.32 | 0.00 |



|               |           |                 |        |                                                                                        |       |      |      |
|---------------|-----------|-----------------|--------|----------------------------------------------------------------------------------------|-------|------|------|
| A_51_P102507  | NM_029929 | Vps33a          | 77573  | vacuolar protein sorting 33A (yeast)                                                   | -3.16 | 0.32 | 0.00 |
| A_51_P492408  | NM_026784 | Pmvk            | 68603  | phosphomevalonate kinase                                                               | -2.56 | 0.32 | 0.00 |
| A_52_P8059    | NM_020011 | Sphk2           | 56632  | sphingosine kinase 2                                                                   | -3.16 | 0.32 | 0.00 |
| A_52_P536494  | NM_008709 | Mycn            | 18109  | v-myc myelocytomatosis viral related oncogene, neuroblastoma derived (avian)           | -2.80 | 0.32 | 0.00 |
| A_51_P486943  | NM_133710 | Ctdspl          | 69274  | CTD (carboxy-terminal domain, RNA polymerase II, polypeptide A) small phosphatase-like | -3.65 | 0.32 | 0.00 |
| A_52_P305307  | NM_011894 | Sh3bp5          | 24056  | SH3-domain binding protein 5 (BTK-associated)                                          | -3.42 | 0.32 | 0.00 |
| A_51_P240287  | X51971    | Car5a           | 12352  | carbonic anhydrase 5a, mitochondrial                                                   | -2.46 | 0.32 | 0.00 |
| A_51_P371876  | NM_027230 | Zmynd8          | 228880 | zinc finger, MYND-type containing 8                                                    | -2.78 | 0.32 | 0.00 |
| A_52_P167166  | AK047842  | Shprh           | 268281 | SNF2 histone linker PHD RING helicase                                                  | -2.22 | 0.32 | 0.01 |
| A_51_P195875  | NM_010929 | Notch4          | 18132  | Notch gene homolog 4 (Drosophila)                                                      | -3.90 | 0.32 | 0.00 |
| A_51_P435911  | NM_133943 | Hsd3b7          | 101502 | hydroxy-delta-5-steroid dehydrogenase, 3 beta- and steroid delta-isomerase 7           | -3.65 | 0.32 | 0.00 |
| A_52_P441634  | NM_177960 | Idi1            | 319554 | isopentenyl-diphosphate delta isomerase                                                | -2.46 | 0.32 | 0.00 |
| A_51_P471502  | NM_028049 | Fbxo22          | 71999  | F-box protein 22                                                                       | -3.82 | 0.32 | 0.00 |
| A_52_P74653   | NM_001039 | Cnnm3           | 94218  | cyclin M3                                                                              | -3.59 | 0.32 | 0.00 |
| A_51_P196596  | NM_030706 | Trim2           | 80890  | tripartite motif-containing 2                                                          | -2.77 | 0.32 | 0.00 |
| A_52_P1052029 | AK031632  | NA              | NA     | NA                                                                                     | -3.20 | 0.32 | 0.00 |
| A_52_P553443  | AK083983  | D730040F1242474 |        | RIKEN cDNA D730040F13 gene                                                             | -3.32 | 0.32 | 0.00 |
| A_51_P245275  | NM_010436 | H2afx           | 15270  | H2A histone family, member X                                                           | -2.59 | 0.32 | 0.00 |
| A_51_P401921  | NM_011480 | Srebf1          | 20787  | sterol regulatory element binding transcription factor 1                               | -3.54 | 0.32 | 0.00 |
| A_51_P191331  | NM_011379 | Sipa1           | 20469  | signal-induced proliferation associated gene 1                                         | -4.05 | 0.32 | 0.00 |
| A_51_P154534  | NM_139063 | Muted           | 17828  | muted                                                                                  | -3.90 | 0.32 | 0.00 |
| A_52_P260659  | NM_001039 | Kcnj10          | 16513  | potassium inwardly-rectifying channel, subfamily J, member 10                          | -3.13 | 0.32 | 0.00 |
| A_52_P509752  | NM_011235 | Rad51l3         | 19364  | RAD51-like 3 (S. cerevisiae)                                                           | -3.13 | 0.32 | 0.00 |
| A_51_P488333  | AK037504  | A130022F0320441 |        | RIKEN cDNA A130022F02 gene                                                             | -2.75 | 0.32 | 0.00 |
| A_51_P288505  | NM_001033 | Tradd           | 71609  | TNFRSF1A-associated via death domain                                                   | -3.54 | 0.32 | 0.00 |
| A_52_P429774  | NM_146105 | Cnst            | 226744 | consortin, connexin sorting protein                                                    | -3.29 | 0.32 | 0.00 |
| A_52_P268269  | AK003909  | Tmem205         | 235043 | transmembrane protein 205                                                              | -2.88 | 0.32 | 0.00 |
| A_51_P140641  | NM_145570 | Fam176a         | 232146 | family with sequence similarity 176, member A                                          | -2.50 | 0.32 | 0.00 |

|              |           |           |        |                                                                                                               |       |      |      |
|--------------|-----------|-----------|--------|---------------------------------------------------------------------------------------------------------------|-------|------|------|
| A_52_P112139 | NM_199302 | Lrsam1    | 227738 | leucine rich repeat and sterile alpha motif containing 1                                                      | -2.89 | 0.32 | 0.00 |
| A_52_P110646 | NM_026187 | Ankzf1    | 52231  | ankyrin repeat and zinc finger domain containing 1<br>solute carrier family 36 (proton/amino acid symporter), | -3.53 | 0.32 | 0.00 |
| A_51_P338563 | AK017918  | Slc36a1   | 215335 | member 1                                                                                                      | -3.53 | 0.32 | 0.00 |
| A_51_P360896 | NM_029236 | Bcdin3d   | 75284  | BCDIN3 domain containing                                                                                      | -3.36 | 0.32 | 0.00 |
| A_52_P414485 | AK164057  | Rab23     | 19335  | RAB23, member RAS oncogene family<br>par-6 (partitioning defective 6) homolog beta (C.                        | -3.15 | 0.32 | 0.00 |
| A_52_P37123  | BC025147  | Pard6b    | 58220  | elegans)                                                                                                      | -3.32 | 0.32 | 0.00 |
| A_51_P279623 | NM_030240 | 2900092E1 | 67278  | RIKEN cDNA 2900092E17 gene                                                                                    | -3.72 | 0.32 | 0.00 |
| A_52_P614762 | AK029400  | Bad       | 12015  | BCL2-associated agonist of cell death                                                                         | -4.05 | 0.32 | 0.00 |
| A_51_P182174 | NM_019831 | Zmym3     | 56364  | zinc finger, MYM-type 3                                                                                       | -3.78 | 0.32 | 0.00 |
| A_52_P193194 | NM_001001 | Slc35d2   | 70484  | solute carrier family 35, member D2                                                                           | -2.83 | 0.32 | 0.00 |
| A_52_P163795 | NM_011655 | Tubb5     | 22154  | tubulin, beta 5                                                                                               | -3.98 | 0.32 | 0.00 |
| A_52_P406191 | XM_985521 | NA        | NA     | NA                                                                                                            | -3.71 | 0.32 | 0.00 |
| A_51_P107282 | NM_181516 | Taz       | 66826  | tafazzin                                                                                                      | -4.38 | 0.32 | 0.00 |
| A_51_P335000 | NM_001077 | Fhl1      | 14199  | four and a half LIM domains 1                                                                                 | -2.52 | 0.32 | 0.00 |
| A_52_P338626 | NM_028995 | Nipal3    | 74552  | NIPA-like domain containing 3                                                                                 | -3.66 | 0.32 | 0.00 |
| A_52_P180972 | NA        | NA        | NA     | NA                                                                                                            | -3.30 | 0.32 | 0.00 |
| A_51_P227445 | NA        | NA        | NA     | NA                                                                                                            | -2.31 | 0.31 | 0.01 |
| A_51_P499530 | NM_133971 | Ankrd10   | 102334 | ankyrin repeat domain 10                                                                                      | -2.32 | 0.31 | 0.01 |
| A_51_P124276 | U05247    | Csk       | 12988  | c-src tyrosine kinase                                                                                         | -3.25 | 0.31 | 0.00 |
| A_52_P488427 | NM_144520 | Sec14l2   | 67815  | SEC14-like 2 ( <i>S. cerevisiae</i> )                                                                         | -3.73 | 0.31 | 0.00 |
| A_52_P11174  | AK147269  | Hip1      | 215114 | huntingtin interacting protein 1                                                                              | -3.48 | 0.31 | 0.00 |
| A_51_P199987 | NM_021896 | Gucy1a3   | 60596  | guanylate cyclase 1, soluble, alpha 3<br>ELOVL family member 5, elongation of long chain fatty                | -2.80 | 0.31 | 0.00 |
| A_52_P676944 | NM_134255 | Elovf5    | 68801  | acids (yeast)                                                                                                 | -2.96 | 0.31 | 0.00 |
| A_52_P68175  | NM_001033 | C77080    | 97130  | expressed sequence C77080                                                                                     | -3.08 | 0.31 | 0.00 |
| A_51_P412526 | AK035704  | 4921513D2 | 223989 | RIKEN cDNA 4921513D23 gene                                                                                    | -2.07 | 0.31 | 0.02 |
| A_51_P142258 | NM_133707 | 1810019J1 | 69073  | RIKEN cDNA 1810019J16 gene                                                                                    | -3.50 | 0.31 | 0.00 |
| A_51_P430555 | NM_175935 | G6pc3     | 68401  | glucose 6 phosphatase, catalytic, 3                                                                           | -3.58 | 0.31 | 0.00 |
| A_51_P380249 | NM_028722 | Msl1      | 74026  | male-specific lethal 1 homolog ( <i>Drosophila</i> )                                                          | -3.80 | 0.31 | 0.00 |

|              |           |          |        |                                                                               |       |      |      |
|--------------|-----------|----------|--------|-------------------------------------------------------------------------------|-------|------|------|
| A_52_P541175 | NM_183195 | Marveld1 | 277010 | MARVEL (membrane-associating) domain containing 1                             | -2.95 | 0.31 | 0.00 |
| A_51_P238734 | NM_178620 | Mfsd11   | 69900  | major facilitator superfamily domain containing 11                            | -3.86 | 0.31 | 0.00 |
| A_52_P626059 | NM_011876 | Twf2     | 23999  | twinfilin, actin-binding protein, homolog 2 (Drosophila)                      | -3.62 | 0.31 | 0.00 |
| A_52_P519943 | BC044804  | Fads6    | 328035 | fatty acid desaturase domain family, member 6                                 | -3.81 | 0.31 | 0.00 |
| A_51_P477768 | NM_198616 | Ccdc85b  | 240514 | coiled-coil domain containing 85B                                             | -3.03 | 0.31 | 0.00 |
| A_52_P275354 | XM_895142 | NA       | NA     | NA                                                                            | -3.60 | 0.31 | 0.00 |
| A_51_P379798 | NM_134469 | Fdps     | 110196 | farnesyl diphosphate synthetase                                               | -2.86 | 0.31 | 0.00 |
| A_51_P208019 | NM_027859 | Rnf215   | 71673  | ring finger protein 215                                                       | -3.90 | 0.31 | 0.00 |
| A_51_P327796 | NM_010580 | Itgb5    | 16419  | integrin beta 5                                                               | -4.28 | 0.31 | 0.00 |
| A_51_P356353 | NM_138651 | Cds2     | 110911 | CDP-diacylglycerol synthase (phosphatidate cytidyltransferase) 2              | -4.07 | 0.31 | 0.00 |
| A_52_P277205 | NM_011780 | Adam23   | 23792  | a disintegrin and metallopeptidase domain 23                                  | -2.65 | 0.31 | 0.00 |
| A_52_P574720 | NM_010959 | Oit3     | 18302  | oncoprotein induced transcript 3                                              | -3.79 | 0.31 | 0.00 |
| A_52_P620496 | AK031480  | Gpr182   | 11536  | G protein-coupled receptor 182                                                | -2.60 | 0.31 | 0.00 |
| A_51_P259726 | NM_054046 | Def8     | 23854  | differentially expressed in FDCP 8                                            | -3.93 | 0.31 | 0.00 |
| A_52_P13802  | NM_009824 | Cbfa2t3  | 12398  | core-binding factor, runt domain, alpha subunit 2, translocated to, 3 (human) | -4.39 | 0.31 | 0.00 |
| A_51_P342707 | NM_008894 | Pold2    | 18972  | polymerase (DNA directed), delta 2, regulatory subunit                        | -3.37 | 0.31 | 0.00 |
| A_52_P260818 | NM_130859 | Card10   | 105844 | caspase recruitment domain family, member 10                                  | -3.05 | 0.31 | 0.00 |
| A_52_P366666 | NM_172442 | Dtx4     | 207521 | deltex 4 homolog (Drosophila)                                                 | -3.23 | 0.31 | 0.00 |
| A_51_P494863 | NM_178926 | Vmac     | 106639 | vimentin-type intermediate filament associated coiled-coil protein            | -3.32 | 0.31 | 0.00 |
| A_51_P361022 | NM_023223 | Cdc20    | 107995 | cell division cycle 20 homolog (S. cerevisiae)                                | -1.89 | 0.31 | 0.04 |
| A_51_P114372 | NM_027877 | Mus81    | 71711  | MUS81 endonuclease homolog (yeast)                                            | -3.70 | 0.31 | 0.00 |
| A_51_P384033 | NM_011183 | Psen2    | 19165  | presenilin 2                                                                  | -3.75 | 0.31 | 0.00 |
| A_51_P115268 | XM_132817 | NA       | NA     | NA                                                                            | -2.69 | 0.31 | 0.00 |
| A_51_P232434 | AK162873  | Abhd1    | 57742  | abhydrolase domain containing 1                                               | -2.17 | 0.31 | 0.01 |
| A_52_P645790 | NM_029581 | Mtif3    | 76366  | mitochondrial translational initiation factor 3                               | -4.19 | 0.31 | 0.00 |
| A_52_P219913 | AK157271  | Cdan1    | 68968  | congenital dyserythropoietic anemia, type I (human)                           | -3.89 | 0.31 | 0.00 |

|              |           |           |        |                                                                                        |       |      |      |
|--------------|-----------|-----------|--------|----------------------------------------------------------------------------------------|-------|------|------|
| A_51_P372585 | NM_019742 | Tusc2     | 80385  | tumor suppressor candidate 2                                                           | -4.03 | 0.31 | 0.00 |
| A_52_P473953 | NM_133710 | Ctdspl    | 69274  | CTD (carboxy-terminal domain, RNA polymerase II, polypeptide A) small phosphatase-like | -3.96 | 0.31 | 0.00 |
| A_51_P337510 | NM_019421 | Cd320     | 54219  | CD320 antigen                                                                          | -4.45 | 0.31 | 0.00 |
| A_51_P380129 | AK018651  | Dnase2a   | 13423  | deoxyribonuclease II alpha                                                             | -2.86 | 0.31 | 0.00 |
| A_51_P360918 | NM_020578 | Ehd3      | 57440  | EH-domain containing 3                                                                 | -3.29 | 0.31 | 0.00 |
| A_52_P648688 | NM_172785 | Zc3h12d   | 237256 | zinc finger CCCH type containing 12D                                                   | -3.32 | 0.31 | 0.00 |
| A_52_P45841  | NM_028976 | Gorasp1   | 74498  | golgi reassembly stacking protein 1                                                    | -3.94 | 0.31 | 0.00 |
| A_51_P216211 | NM_197992 | Pcgf1     | 69837  | polycomb group ring finger 1                                                           | -3.36 | 0.31 | 0.00 |
| A_51_P242560 | NM_026844 | 2310061C1 | 66531  | RIKEN cDNA 2310061C15 gene                                                             | -3.41 | 0.31 | 0.00 |
| A_52_P385206 | BC094315  | Harbi1    | 241547 | harbinger transposase derived 1                                                        | -3.85 | 0.31 | 0.00 |
| A_52_P469782 | NM_146228 | Als2cl    | 235633 | ALS2 C-terminal like                                                                   | -4.14 | 0.31 | 0.00 |
| A_52_P419247 | NM_030706 | Trim2     | 80890  | tripartite motif-containing 2                                                          | -3.22 | 0.31 | 0.00 |
| A_52_P494380 | NM_199011 | Dgkq      | 110524 | diacylglycerol kinase, theta                                                           | -4.12 | 0.31 | 0.00 |
| A_52_P660047 | AK143964  | 1810034E1 | 66503  | RIKEN cDNA 1810034E14 gene                                                             | -3.89 | 0.31 | 0.00 |
| A_52_P406507 | NM_027877 | Mus81     | 71711  | MUS81 endonuclease homolog (yeast)                                                     | -4.41 | 0.31 | 0.00 |
| A_52_P550325 | NM_010604 | Kcnj16    | 16517  | potassium inwardly-rectifying channel, subfamily J, member 16                          | -2.57 | 0.31 | 0.00 |
| A_51_P466828 | NA        | NA        | NA     | NA                                                                                     | -3.95 | 0.31 | 0.00 |
| A_51_P383737 | NM_145611 | Kank2     | 235041 | KN motif and ankyrin repeat domains 2                                                  | -3.79 | 0.30 | 0.00 |
| A_52_P601437 | NM_009345 | Dntt      | 21673  | deoxynucleotidyltransferase, terminal                                                  | -1.70 | 0.30 | 0.09 |
| A_51_P468876 | NM_178118 | Dixdc1    | 330938 | DIX domain containing 1                                                                | -1.21 | 0.30 | 0.61 |
| A_52_P671502 | AK047515  | 9930021J0 | 240613 | RIKEN cDNA 9930021J03 gene                                                             | -3.08 | 0.30 | 0.00 |
| A_51_P293077 | NM_008583 | Men1      | 17283  | multiple endocrine neoplasia 1                                                         | -4.06 | 0.30 | 0.00 |
| A_51_P155997 | NM_029850 | Bcl7a     | 77045  | B-cell CLL/lymphoma 7A                                                                 | -2.79 | 0.30 | 0.00 |
| A_51_P301848 | NM_133345 | Ing4      | 28019  | inhibitor of growth family, member 4                                                   | -4.04 | 0.30 | 0.00 |
| A_51_P147684 | X76653    | Nr2f2     | 11819  | nuclear receptor subfamily 2, group F, member 2                                        | -3.03 | 0.30 | 0.00 |
| A_51_P188602 | NM_198424 | Orai3     | 269999 | ORAI calcium release-activated calcium modulator 3                                     | -3.54 | 0.30 | 0.00 |
| A_52_P24648  | NM_001003 | Kdm2b     | 30841  | lysine (K)-specific demethylase 2B                                                     | -2.78 | 0.30 | 0.00 |
| A_52_P674357 | NM_153083 | Thtpa     | 105663 | thiamine triphosphatase                                                                | -3.76 | 0.30 | 0.00 |
| A_52_P356313 | XM_001005 | NA        | NA     | NA                                                                                     | -3.18 | 0.30 | 0.00 |
| A_52_P279368 | NM_011441 | Sox17     | 20671  | SRY-box containing gene 17                                                             | -3.93 | 0.30 | 0.00 |
| A_51_P512981 | NM_026845 | Ppil1     | 68816  | peptidylprolyl isomerase (cyclophilin)-like 1                                          | -3.00 | 0.30 | 0.00 |

|              |           |           |        |                                                           |       |      |      |
|--------------|-----------|-----------|--------|-----------------------------------------------------------|-------|------|------|
| A_51_P479786 | NM_013870 | Smtn      | 29856  | smoothelin                                                | -4.08 | 0.30 | 0.00 |
| A_52_P367760 | NM_138304 | Calml4    | 75600  | calmodulin-like 4                                         | -3.23 | 0.30 | 0.00 |
| A_51_P507129 | NM_025411 | 1110049F1 | 66193  | RIKEN cDNA 1110049F12 gene                                | -3.87 | 0.30 | 0.00 |
| A_52_P157450 | NM_021304 | Abhd1     | 57742  | abhydrolase domain containing 1                           | -2.28 | 0.30 | 0.01 |
| A_51_P470311 | NM_028634 | Cby1      | 73739  | chibby homolog 1 (Drosophila)                             | -3.89 | 0.30 | 0.00 |
| A_52_P232935 | NM_027251 | 2010107G2 | 69894  | RIKEN cDNA 2010107G23 gene                                | -3.70 | 0.30 | 0.00 |
| A_52_P197402 | BC072607  | Tbc1d30   | 74694  | TBC1 domain family, member 30                             | -2.78 | 0.30 | 0.00 |
| A_51_P248328 | NM_144558 | Bivm      | 246229 | basic, immunoglobulin-like variable motif containing      | -2.59 | 0.30 | 0.00 |
| A_52_P336629 | NA        | NA        | NA     | NA                                                        | -3.50 | 0.30 | 0.00 |
| A_51_P427926 | NM_008542 | Smad6     | 17130  | MAD homolog 6 (Drosophila)                                | -2.37 | 0.30 | 0.01 |
| A_51_P452953 | NM_007485 | Rhod      | 11854  | ras homolog gene family, member D                         | -3.49 | 0.30 | 0.00 |
| A_52_P364279 | NM_198026 | lqcc      | 230767 | IQ motif containing C                                     | -4.64 | 0.30 | 0.00 |
| A_51_P184796 | NM_009542 | Zfp101    | 22643  | zinc finger protein 101                                   | -2.86 | 0.30 | 0.00 |
| A_51_P394833 | AK220545  | Tshz1     | 110796 | teashirt zinc finger family member 1                      | -4.03 | 0.30 | 0.00 |
| A_51_P372992 | NM_028732 | 4632428N0 | 74048  | RIKEN cDNA 4632428N05 gene                                | -3.96 | 0.30 | 0.00 |
| A_52_P275627 | NM_008379 | Kpnb1     | 16211  | karyopherin (importin) beta 1                             | -4.21 | 0.30 | 0.00 |
| A_52_P73475  | NM_175511 | Fam78a    | 241303 | family with sequence similarity 78, member A              | -4.22 | 0.30 | 0.00 |
| A_51_P417651 | NM_027560 | Arrdc2    | 70807  | arrestin domain containing 2                              | -3.15 | 0.30 | 0.00 |
| A_51_P410112 | NM_139153 | Agap3     | 213990 | ArfGAP with GTPase domain, ankyrin repeat and PH domain 3 | -3.99 | 0.30 | 0.00 |
| A_52_P501077 | NM_199200 | Fam171a2  | 217219 | family with sequence similarity 171, member A2            | -2.68 | 0.30 | 0.00 |
| A_52_P620399 | NM_009697 | Nr2f2     | 11819  | nuclear receptor subfamily 2, group F, member 2           | -3.62 | 0.30 | 0.00 |
| A_52_P182659 | NM_026444 | Cs        | 12974  | citrate synthase                                          | -3.61 | 0.30 | 0.00 |
| A_51_P393998 | NM_031375 | Ngrn      | 83485  | neugrin, neurite outgrowth associated                     | -4.11 | 0.30 | 0.00 |
| A_51_P190425 | AK129051  | Dna2      | 327762 | DNA replication helicase 2 homolog (yeast)                | -2.93 | 0.30 | 0.00 |
| A_51_P496001 | NM_030066 | Armcx1    | 78248  | armadillo repeat containing, X-linked 1                   | -3.87 | 0.30 | 0.00 |
| A_52_P482124 | NM_026455 | Fam32a    | 67922  | family with sequence similarity 32, member A              | -4.51 | 0.30 | 0.00 |
| A_52_P219372 | NM_175106 | Tmem177   | 66343  | transmembrane protein 177                                 | -3.43 | 0.30 | 0.00 |
| A_51_P329711 | NM_177960 | Idi1      | 319554 | isopentenyl-diphosphate delta isomerase                   | -2.85 | 0.30 | 0.00 |
| A_52_P260994 | NM_013710 | Fgd2      | 26382  | FYVE, RhoGEF and PH domain containing 2                   | -3.68 | 0.30 | 0.00 |
| A_51_P335849 | NM_023465 | Ctnnbip1  | 67087  | catenin beta interacting protein 1                        | -3.39 | 0.30 | 0.00 |
| A_51_P143190 | NM_008535 | Lyl1      | 17095  | lymphoblastomic leukemia 1                                | -3.96 | 0.30 | 0.00 |
| A_51_P280437 | NM_133649 | Slc12a6   | 107723 | solute carrier family 12, member 6                        | -3.33 | 0.29 | 0.00 |

|              |           |            |        |                                                      |       |      |      |
|--------------|-----------|------------|--------|------------------------------------------------------|-------|------|------|
| A_52_P637338 | NM_025538 | Alkbh7     | 66400  | alkB, alkylation repair homolog 7 (E. coli)          | -3.86 | 0.29 | 0.00 |
| A_51_P120027 | AK004863  | Adh6-ps1   | 71749  | alcohol dehydrogenase 6 (class V), pseudogene 1      | -2.10 | 0.29 | 0.01 |
| A_51_P321965 | NM_023464 | Ssna1      | 68475  | Sjogren's syndrome nuclear autoantigen 1             | -4.93 | 0.29 | 0.00 |
| A_52_P84275  | NM_033562 | Der12      | 116891 | Der1-like domain family, member 2                    | -3.49 | 0.29 | 0.00 |
| A_51_P430485 | NM_025536 | Commd5     | 66398  | COMM domain containing 5                             | -3.31 | 0.29 | 0.00 |
| A_52_P516097 | NM_175529 | Leng9      | 243813 | leukocyte receptor cluster (LRC) member 9            | -3.39 | 0.29 | 0.00 |
| A_51_P297336 | NM_134078 | Chmp7      | 105513 | CHMP family, member 7                                | -3.48 | 0.29 | 0.00 |
|              |           |            |        | tumor-suppressing subchromosomal transferable        |       |      |      |
| A_51_P179241 | NM_020285 | Tssc4      | 56844  | fragment 4                                           | -3.28 | 0.29 | 0.00 |
| A_52_P561377 | NM_145505 | Fam160b1   | 226252 | family with sequence similarity 160, member B1       | -2.85 | 0.29 | 0.00 |
|              |           |            |        | solute carrier family 9 (sodium/hydrogen exchanger), |       |      |      |
| A_52_P241676 | NM_023449 | Slc9a3r2   | 65962  | member 3 regulator 2                                 | -3.38 | 0.29 | 0.00 |
| A_51_P451516 | NM_028027 | D10Ertd61f | 52666  | DNA segment, Chr 10, ERATO Doi 610, expressed        | -3.28 | 0.29 | 0.00 |
| A_51_P410918 | NM_146115 | A830007P12 | 227612 | RIKEN cDNA A830007P12 gene                           | -4.73 | 0.29 | 0.00 |
| A_51_P214269 | NM_023580 | Epha1      | 13835  | Eph receptor A1                                      | -4.50 | 0.29 | 0.00 |
| A_51_P450191 | NM_026639 | Art4       | 109978 | ADP-ribosyltransferase 4                             | -4.40 | 0.29 | 0.00 |
| A_52_P303650 | XM_149712 | NA         | NA     | NA                                                   | -4.71 | 0.29 | 0.00 |
| A_51_P249268 | AK122246  | D130043K2  | 210108 | RIKEN cDNA D130043K22 gene                           | -3.34 | 0.29 | 0.00 |
| A_51_P208697 | NM_027192 | Ttl        | 69737  | tubulin tyrosine ligase                              | -3.41 | 0.29 | 0.00 |
| A_51_P211964 | NM_025304 | Lcmt1      | 30949  | leucine carboxyl methyltransferase 1                 | -4.20 | 0.29 | 0.00 |
| A_52_P564005 | AK018584  | Zfp251     | 71591  | zinc finger protein 251                              | -3.05 | 0.29 | 0.00 |
| A_51_P466829 | NM_175474 | Fam109a    | 231717 | family with sequence similarity 109, member A        | -3.68 | 0.29 | 0.00 |
| A_51_P256224 | NM_146202 | Zfp768     | 233890 | zinc finger protein 768                              | -1.69 | 0.29 | 0.09 |
| A_51_P413177 | NM_172151 | Zdhhc8     | 27801  | zinc finger, DHHC domain containing 8                | -4.32 | 0.29 | 0.00 |
| A_51_P167971 | NM_011792 | Bace1      | 23821  | beta-site APP cleaving enzyme 1                      | -4.00 | 0.29 | 0.00 |
| A_51_P492125 | NM_134141 | Ciapi1     | 109006 | cytokine induced apoptosis inhibitor 1               | -3.22 | 0.29 | 0.00 |
| A_52_P655206 | AK050258  | NA         | NA     | NA                                                   | -3.35 | 0.29 | 0.00 |
| A_51_P268343 | NM_025857 | Aagab      | 66939  | alpha- and gamma-adaptin binding protein             | -3.71 | 0.29 | 0.00 |
| A_51_P341177 | NM_016765 | Ddah2      | 51793  | dimethylarginine dimethylaminohydrolase 2            | -3.47 | 0.29 | 0.00 |
| A_52_P521122 | AK051786  | Lyst       | 17101  | lysosomal trafficking regulator                      | -2.25 | 0.29 | 0.01 |
| A_52_P214956 | NM_172414 | Fam164c    | 72350  | family with sequence similarity 164, member C        | -4.07 | 0.29 | 0.00 |
| A_52_P230650 | BC025016  | NA         | NA     | NA                                                   | -2.64 | 0.29 | 0.00 |
| A_51_P480020 | AK016444  | 4931408D1  | 177059 | RIKEN cDNA 4931408D14 gene                           | -2.84 | 0.29 | 0.00 |
| A_52_P84353  | NM_183174 | Homez      | 239099 | homeodomain leucine zipper-encoding gene             | -3.68 | 0.29 | 0.00 |

|              |           |           |        |                                                                                             |       |      |      |
|--------------|-----------|-----------|--------|---------------------------------------------------------------------------------------------|-------|------|------|
| A_51_P352264 | NM_153056 | Sirt7     | 209011 | sirtuin 7 (silent mating type information regulation 2, homolog) 7 ( <i>S. cerevisiae</i> ) | -4.66 | 0.29 | 0.00 |
| A_51_P242021 | NM_019400 | Rabep1    | 54189  | rabaptin, RAB GTPase binding effector protein 1                                             | -3.92 | 0.29 | 0.00 |
| A_51_P164539 | NM_033474 | Arvcf     | 11877  | armadillo repeat gene deleted in velo-cardio-facial syndrome                                | -3.29 | 0.29 | 0.00 |
| A_51_P352005 | NM_008294 | Hsd3b4    | 15495  | hydroxy-delta-5-steroid dehydrogenase, 3 beta- and steroid delta-isomerase 4                | -2.91 | 0.29 | 0.00 |
| A_52_P226489 | CJ042244  | NA        | NA     | NA                                                                                          | -3.08 | 0.29 | 0.00 |
| A_51_P389265 | NM_054088 | Pnpla3    | 116939 | patatin-like phospholipase domain containing 3                                              | -1.52 | 0.29 | 0.18 |
| A_52_P599388 | AK076221  | Cpeb2     | 231207 | cytoplasmic polyadenylation element binding protein 2                                       | -1.98 | 0.29 | 0.03 |
| A_52_P573970 | BC024096  | Pex11c    | 69129  | peroxisomal biogenesis factor 11 gamma                                                      | -3.84 | 0.29 | 0.00 |
| A_52_P478550 | NM_001005 | Zfp69     | 381549 | zinc finger protein 69                                                                      | -2.68 | 0.29 | 0.00 |
| A_51_P472659 | NM_026169 | Frmd8     | 67457  | FERM domain containing 8                                                                    | -3.93 | 0.29 | 0.00 |
| A_51_P231042 | NM_053094 | Cd163     | 93671  | CD163 antigen                                                                               | -3.32 | 0.29 | 0.00 |
| A_51_P354077 | NM_153153 | Svil      | 225115 | supervillin                                                                                 | -3.95 | 0.29 | 0.00 |
| A_52_P86534  | NM_033134 | Inpp5e    | 64436  | inositol polyphosphate-5-phosphatase E                                                      | -3.41 | 0.29 | 0.00 |
| A_52_P553000 | NM_172509 | Kctd7     | 212919 | potassium channel tetramerisation domain containing 7                                       | -4.33 | 0.29 | 0.00 |
| A_52_P578922 | AK159899  | Hmgcr     | 15357  | 3-hydroxy-3-methylglutaryl-Coenzyme A reductase                                             | -2.54 | 0.29 | 0.00 |
| A_51_P370341 | NM_133879 | Zbtb48    | 100090 | zinc finger and BTB domain containing 48                                                    | -2.96 | 0.29 | 0.00 |
| A_51_P310447 | BC079880  | Fam65a    | 75687  | family with sequence similarity 65, member A                                                | -4.17 | 0.29 | 0.00 |
| A_51_P487308 | NM_001039 | Pstk      | 214580 | phosphoserine-tRNA kinase                                                                   | -3.94 | 0.29 | 0.00 |
| A_51_P254954 | NM_009125 | Atxn2     | 20239  | ataxin 2                                                                                    | -2.86 | 0.29 | 0.00 |
| A_51_P369381 | AK003902  | 1110021L0 | 76306  | RIKEN cDNA 1110021L09 gene                                                                  | -3.78 | 0.28 | 0.00 |
| A_52_P408530 | NM_178048 | St3gal2   | 20444  | ST3 beta-galactoside alpha-2,3-sialyltransferase 2                                          | -4.02 | 0.28 | 0.00 |
| A_52_P449199 | NM_001037 | Dyrk1b    | 13549  | dual-specificity tyrosine-(Y)-phosphorylation regulated kinase 1b                           | -3.62 | 0.28 | 0.00 |
| A_52_P138727 | NM_153056 | Sirt7     | 209011 | sirtuin 7 (silent mating type information regulation 2, homolog) 7 ( <i>S. cerevisiae</i> ) | -4.65 | 0.28 | 0.00 |
| A_51_P393999 | NM_031375 | Ngrn      | 83485  | neugrin, neurite outgrowth associated                                                       | -4.08 | 0.28 | 0.00 |
| A_51_P169047 | NM_019551 | Ttrap     | 56196  | TRAF and TNF receptor associated protein                                                    | -4.83 | 0.28 | 0.00 |

|              |           |           |        |                                                                              |       |      |      |
|--------------|-----------|-----------|--------|------------------------------------------------------------------------------|-------|------|------|
| A_52_P267651 | NM_007489 | Arntl     | 11865  | aryl hydrocarbon receptor nuclear translocator-like                          | -1.96 | 0.28 | 0.03 |
| A_51_P148783 | NA        | NA        | NA     | NA                                                                           | -3.29 | 0.28 | 0.00 |
| A_51_P283766 | NM_028199 | Plxdc1    | 72324  | plexin domain containing 1                                                   | -3.60 | 0.28 | 0.00 |
| A_51_P253094 | NM_146177 | Suv420h2  | 232811 | suppressor of variegation 4-20 homolog 2 (Drosophila)                        | -4.15 | 0.28 | 0.00 |
| A_51_P395856 | NM_144856 | Slc22a7   | 108114 | solute carrier family 22 (organic anion transporter), member 7               | -3.06 | 0.28 | 0.00 |
| A_51_P269546 | NM_031254 | Trem2     | 83433  | triggering receptor expressed on myeloid cells 2                             | -2.51 | 0.28 | 0.00 |
| A_51_P431491 | AB093257  | Rab11fip3 | 215445 | RAB11 family interacting protein 3 (class II)                                | -4.50 | 0.28 | 0.00 |
| A_51_P162624 | NM_133678 | Sac3d1    | 66406  | SAC3 domain containing 1                                                     | -4.41 | 0.28 | 0.00 |
| A_52_P53596  | NM_001013 | Sesn1     | 140742 | sestrin 1                                                                    | -2.55 | 0.28 | 0.00 |
| A_52_P120022 | NM_197945 | RP23-100C | 241638 | ProSAPiP1 protein                                                            | -3.53 | 0.28 | 0.00 |
| A_52_P255494 | BB425408  | Sec22c    | 215474 | SEC22 vesicle trafficking protein homolog C (S. cerevisiae)                  | -3.75 | 0.28 | 0.00 |
| A_51_P498631 | NM_018769 | Dfna5     | 54722  | deafness, autosomal dominant 5 (human)                                       | -3.35 | 0.28 | 0.00 |
| A_51_P424739 | NM_144533 | Nmnat3    | 74080  | nicotinamide nucleotide adenylyltransferase 3                                | -3.62 | 0.28 | 0.00 |
| A_51_P476321 | NM_133858 | Fam63a    | 75007  | family with sequence similarity 63, member A                                 | -3.63 | 0.28 | 0.00 |
| A_51_P501538 | NM_009624 | Adcy9     | 11515  | adenylate cyclase 9                                                          | -3.06 | 0.28 | 0.00 |
| A_51_P191087 | U33198    | Cep250    | 16328  | centrosomal protein 250                                                      | -3.91 | 0.28 | 0.00 |
| A_52_P463687 | AK133434  | AI426330  | 101563 | expressed sequence AI426330                                                  | -3.83 | 0.28 | 0.00 |
| A_51_P333831 | AK008102  | 2010004M  | 76511  | RIKEN cDNA 2010004M13 gene                                                   | -3.91 | 0.28 | 0.00 |
| A_51_P416660 | NM_172587 | Cdc14b    | 218294 | CDC14 cell division cycle 14 homolog B (S. cerevisiae)                       | -3.21 | 0.28 | 0.00 |
| A_51_P496162 | NM_008295 | Hsd3b5    | 15496  | hydroxy-delta-5-steroid dehydrogenase, 3 beta- and steroid delta-isomerase 5 | -3.35 | 0.28 | 0.00 |
| A_52_P282987 | NM_001033 | Yeats2    | 208146 | YEATS domain containing 2                                                    | -4.01 | 0.28 | 0.00 |
| A_52_P796069 | NA        | NA        | NA     | NA                                                                           | -3.66 | 0.28 | 0.00 |
| A_51_P140721 | NM_028117 | Chst14    | 72136  | carbohydrate (N-acetylgalactosamine 4-0) sulfotransferase 14                 | -4.99 | 0.28 | 0.00 |
| A_51_P373793 | NM_172731 | Fgd5      | 232237 | FYVE, RhoGEF and PH domain containing 5                                      | -3.68 | 0.28 | 0.00 |
| A_52_P434841 | NM_183270 | Chchd8    | 68185  | coiled-coil-helix-coiled-coil-helix domain containing 8                      | -4.75 | 0.28 | 0.00 |
| A_51_P209183 | NM_019568 | Cxcl14    | 57266  | chemokine (C-X-C motif) ligand 14                                            | -1.90 | 0.28 | 0.04 |



|              |            |           |        |                                                                                                              |       |      |      |
|--------------|------------|-----------|--------|--------------------------------------------------------------------------------------------------------------|-------|------|------|
| A_51_P299866 | NM_028011  | Tom11l    | 71943  | target of myb1-like 1 (chicken)                                                                              | -4.16 | 0.28 | 0.00 |
| A_51_P506015 | NM_027230  | Zmynd8    | 228880 | zinc finger, MYND-type containing 8                                                                          | -4.05 | 0.28 | 0.00 |
| A_52_P113250 | NM_178082  | Insig2    | 72999  | insulin induced gene 2                                                                                       | -3.76 | 0.28 | 0.00 |
| A_51_P450296 | NM_175152  | Thap3     | 69876  | THAP domain containing, apoptosis associated protein 3                                                       | -4.57 | 0.28 | 0.00 |
| A_51_P373082 | AF027707   | Bok       | 51800  | BCL2-related ovarian killer protein                                                                          | -3.74 | 0.28 | 0.00 |
| A_51_P180091 | NM_028775  | Cyp2s1    | 74134  | cytochrome P450, family 2, subfamily s, polypeptide 1                                                        | -1.34 | 0.28 | 0.37 |
| A_51_P179686 | NM_026327  | 1810048J1 | 67708  | RIKEN cDNA 1810048J11 gene<br>avian musculoaponeurotic fibrosarcoma (v-maf) AS42                             | -3.17 | 0.28 | 0.00 |
| A_51_P405167 | NM_001025! | Maf       | 17132  | oncogene homolog                                                                                             | -3.71 | 0.28 | 0.00 |
| A_51_P184353 | NM_010150  | Nr2f6     | 13864  | nuclear receptor subfamily 2, group F, member 6                                                              | -4.14 | 0.28 | 0.00 |
| A_51_P481528 | AK034156   | Dennd5b   | 320560 | DENN/MADD domain containing 5B                                                                               | -2.03 | 0.28 | 0.02 |
| A_51_P109668 | NM_023672  | Ssbp3     | 72475  | single-stranded DNA binding protein 3                                                                        | -3.98 | 0.28 | 0.00 |
| A_52_P68477  | NM_172763  | Zfp809    | 235047 | zinc finger protein 809                                                                                      | -3.63 | 0.28 | 0.00 |
| A_51_P469951 | NM_153070  | NA        | NA     | NA                                                                                                           | -2.62 | 0.28 | 0.00 |
| A_52_P338033 | AK135612   | Rcor3     | 214742 | REST corepressor 3                                                                                           | -4.29 | 0.28 | 0.00 |
| A_52_P198435 | NM_207246  | Rasgrp3   | 240168 | RAS, guanyl releasing protein 3                                                                              | -3.15 | 0.28 | 0.00 |
| A_52_P302012 | NM_026844  | 2310061C1 | 66531  | RIKEN cDNA 2310061C15 gene                                                                                   | -3.38 | 0.28 | 0.00 |
| A_52_P479099 | NM_009448  | Tuba1c    | 22146  | tubulin, alpha 1C                                                                                            | -2.13 | 0.28 | 0.01 |
| A_52_P563917 | NM_144914  | Tmem184a  | 231832 | transmembrane protein 184a                                                                                   | -3.70 | 0.28 | 0.00 |
| A_51_P482844 | AK004291   | Pycrl     | 66194  | pyrroline-5-carboxylate reductase-like                                                                       | -4.32 | 0.28 | 0.00 |
| A_52_P208471 | NM_145527  | Madd      | 228355 | MAP-kinase activating death domain                                                                           | -4.96 | 0.28 | 0.00 |
| A_52_P263774 | NM_144811  | Cbx7      | 52609  | chromobox homolog 7                                                                                          | -3.51 | 0.27 | 0.00 |
| A_51_P120220 | AK087819   | Sipa1l3   | 74206  | signal-induced proliferation-associated 1 like 3                                                             | -3.10 | 0.27 | 0.00 |
| A_52_P92472  | NA         | NA        | NA     | NA                                                                                                           | -3.64 | 0.27 | 0.00 |
| A_52_P98558  | NM_173765  | Aasdh     | 231326 | aminoadipate-semialdehyde dehydrogenase                                                                      | -3.83 | 0.27 | 0.00 |
| A_52_P247733 | AK053118   | Prune     | 229589 | prune homolog (Drosophila)                                                                                   | -3.18 | 0.27 | 0.00 |
| A_51_P151070 | AK046642   | Gm9971    | 1E+08  | predicted gene 9971                                                                                          | -3.90 | 0.27 | 0.00 |
| A_52_P600087 | NA         | NA        | NA     | NA                                                                                                           | -3.58 | 0.27 | 0.00 |
| A_51_P516133 | NM_015786  | Hist1h1c  | 50708  | histone cluster 1, H1c                                                                                       | -3.36 | 0.27 | 0.00 |
| A_51_P338705 | NM_181404  | Kank1     | 107351 | KN motif and ankyrin repeat domains 1<br>ELOVL family member 5, elongation of long chain fatty acids (yeast) | -2.71 | 0.27 | 0.00 |
| A_51_P505493 | NM_134255  | Elovl5    | 68801  |                                                                                                              | -3.65 | 0.27 | 0.00 |

|               |            |          |        |                                                                               |       |      |      |
|---------------|------------|----------|--------|-------------------------------------------------------------------------------|-------|------|------|
| A_51_P464361  | NM_172283  | Fuk      | 234730 | fucokinase                                                                    | -4.23 | 0.27 | 0.00 |
| A_51_P169527  | NM_023556  | Mvk      | 17855  | mevalonate kinase                                                             | -3.86 | 0.27 | 0.00 |
| A_51_P146701  | AK156993   | Nsdhl    | 18194  | NAD(P) dependent steroid dehydrogenase-like                                   | -3.64 | 0.27 | 0.00 |
| A_51_P413122  | NM_028126  | Strada   | 72149  | STE20-related kinase adaptor alpha                                            | -4.36 | 0.27 | 0.00 |
| A_52_P320181  | AK083075   | Pygl     | 110095 | liver glycogen phosphorylase                                                  | -4.22 | 0.27 | 0.00 |
| A_51_P509384  | NM_178713  | Aldh8a1  | 237320 | aldehyde dehydrogenase 8 family, member A1                                    | -3.71 | 0.27 | 0.00 |
| A_51_P212993  | NM_021499  | Wdr8     | 59002  | WD repeat domain 8                                                            | -3.12 | 0.27 | 0.00 |
| A_51_P417917  | NM_001004: | Plekhg5  | 269608 | pleckstrin homology domain containing, family G (with RhoGef domain) member 5 | -3.68 | 0.27 | 0.00 |
| A_51_P268964  | AK013928   | 3100003M | 73082  | RIKEN cDNA 3100003M19 gene                                                    | -3.99 | 0.27 | 0.00 |
| A_51_P321385  | AK129277   | Amot     | 27494  | angiomin                                                                      | -4.29 | 0.27 | 0.00 |
| A_51_P448995  | NM_026494  | Ppcs     | 106564 | phosphopantothenoylecysteine synthetase                                       | -4.80 | 0.27 | 0.00 |
| A_52_P101982  | NM_026698  | Tmem129  | 68366  | transmembrane protein 129                                                     | -4.00 | 0.27 | 0.00 |
| A_52_P387724  | NM_001079: | Tcf7l1   | 21415  | transcription factor 7-like 1 (T-cell specific, HMG box)                      | -4.73 | 0.27 | 0.00 |
| A_52_P1139509 | AK037434   | NA       | NA     | NA                                                                            | -3.78 | 0.27 | 0.00 |
| A_51_P397537  | NM_029660  | Rbmxl2   | 76572  | RNA binding motif protein, X-linked-like 2                                    | -3.33 | 0.27 | 0.00 |
| A_51_P266211  | NM_133741  | Snrk     | 20623  | SNF related kinase                                                            | -4.97 | 0.27 | 0.00 |
| A_51_P336622  | NM_021428  | Dexi     | 58239  | dexamethasone-induced transcript                                              | -3.90 | 0.27 | 0.00 |
| A_52_P503809  | NM_009448  | Tuba1c   | 22146  | tubulin, alpha 1C                                                             | -3.23 | 0.27 | 0.00 |
| A_51_P368009  | NM_177733  | E2f2     | 242705 | E2F transcription factor 2                                                    | -2.57 | 0.27 | 0.00 |
| A_51_P248580  | NM_007953  | Esrra    | 26379  | estrogen related receptor, alpha                                              | -3.82 | 0.27 | 0.00 |
| A_52_P553316  | NM_133741  | Snrk     | 20623  | SNF related kinase                                                            | -3.94 | 0.27 | 0.00 |
| A_51_P414396  | NM_153127  | Mmrn2    | 105450 | multimerin 2                                                                  | -3.58 | 0.27 | 0.00 |
| A_51_P283649  | NM_172724  | AA881470 | 231841 | EST AA881470                                                                  | -4.70 | 0.27 | 0.00 |
| A_51_P116609  | NM_025687  | Tex12    | 66654  | testis expressed gene 12                                                      | -3.61 | 0.27 | 0.00 |
| A_51_P346634  | BC025879   | Armcx4   | 102910 | armadillo repeat containing, X-linked 4                                       | -2.17 | 0.27 | 0.01 |
| A_51_P501312  | NM_025294  | Gm16515  | 24083  | predicted gene, Gm16515                                                       | -4.02 | 0.27 | 0.00 |
| A_52_P1012460 | AK145625   | NA       | NA     | NA                                                                            | -4.46 | 0.27 | 0.00 |
| A_52_P577084  | AK019597   | NA       | NA     | NA                                                                            | -3.74 | 0.27 | 0.00 |
| A_51_P485946  | NM_010191  | Fdft1    | 14137  | farnesyl diphosphate farnesyl transferase 1                                   | -3.69 | 0.27 | 0.00 |
| A_51_P488063  | NM_172122  | Crocc    | 230872 | ciliary rootlet coiled-coil, rootletin                                        | -4.72 | 0.27 | 0.00 |
| A_51_P469160  | NM_021557  | Rdh11    | 17252  | retinol dehydrogenase 11                                                      | -3.28 | 0.26 | 0.00 |
| A_52_P193191  | NM_001001: | Slc35d2  | 70484  | solute carrier family 35, member D2                                           | -3.32 | 0.26 | 0.00 |

|              |           |           |        |                                                       |       |      |      |
|--------------|-----------|-----------|--------|-------------------------------------------------------|-------|------|------|
| A_52_P407145 | NM_025299 | Txn14a    | 27366  | thioredoxin-like 4A                                   | -3.37 | 0.26 | 0.00 |
| A_52_P219266 | NM_026169 | Frmd8     | 67457  | FERM domain containing 8                              | -4.06 | 0.26 | 0.00 |
| A_52_P131548 | NM_010590 | Jub       | 16475  | ajuba                                                 | -4.09 | 0.26 | 0.00 |
| A_51_P101075 | NM_026977 | 1810031K1 | 69171  | RIKEN cDNA 1810031K17 gene                            | -4.48 | 0.26 | 0.00 |
| A_51_P120674 | NM_013508 | Elk3      | 13713  | ELK3, member of ETS oncogene family                   | -4.27 | 0.26 | 0.00 |
| A_51_P331570 | NM_175093 | Trib3     | 228775 | tribbles homolog 3 (Drosophila)                       | -3.10 | 0.26 | 0.00 |
| A_52_P282500 | NM_001039 | Kif21b    | 16565  | kinesin family member 21B                             | -3.47 | 0.26 | 0.00 |
| A_51_P223404 | NM_025836 | Plin3     | 66905  | perilipin 3                                           | -3.70 | 0.26 | 0.00 |
| A_51_P410451 | NM_028006 | Tube1     | 71924  | epsilon-tubulin 1                                     | -5.57 | 0.26 | 0.00 |
| A_51_P329928 | NM_013750 | Phlda3    | 27280  | pleckstrin homology-like domain, family A, member 3   | -2.95 | 0.26 | 0.00 |
| A_52_P108768 | NA        | NA        | NA     | NA                                                    | -3.27 | 0.26 | 0.00 |
| A_52_P209484 | NM_025915 | Tmem88    | 67020  | transmembrane protein 88                              | -3.85 | 0.26 | 0.00 |
| A_52_P413947 | NM_010840 | Mthfr     | 17769  | 5,10-methylenetetrahydrofolate reductase              | -2.81 | 0.26 | 0.00 |
| A_52_P450835 | NM_197998 | 2210021J2 | 72355  | RIKEN cDNA 2210021J22 gene                            | -2.68 | 0.26 | 0.00 |
| A_52_P396974 | BC057314  | Sfrs8     | 231769 | splicing factor, arginine/serine-rich 8               | -3.32 | 0.26 | 0.00 |
| A_51_P293938 | NM_026878 | Rasl11b   | 68939  | RAS-like, family 11, member B                         | -3.62 | 0.26 | 0.00 |
| A_52_P509297 | NM_001038 | Mapt      | 17762  | microtubule-associated protein tau                    | -3.01 | 0.26 | 0.00 |
| A_51_P215475 | NM_029928 | Ptprb     | 19263  | protein tyrosine phosphatase, receptor type, B        | -3.38 | 0.26 | 0.00 |
| A_51_P386503 | NM_026185 | Abhd15    | 67477  | abhydrolase domain containing 15                      | -3.50 | 0.26 | 0.00 |
| A_51_P305547 | NM_011415 | Snai2     | 20583  | snail homolog 2 (Drosophila)                          | -3.23 | 0.26 | 0.00 |
| A_52_P407007 | BC037267  | 4632415L0 | 70808  | RRS1 ribosome biogenesis regulator homolog pseudogene | -3.68 | 0.26 | 0.00 |
| A_51_P144349 | NM_172442 | Dtx4      | 207521 | deltex 4 homolog (Drosophila)                         | -4.29 | 0.26 | 0.00 |
| A_51_P115666 | NM_134087 | Fam83h    | 105732 | family with sequence similarity 83, member H          | -4.46 | 0.26 | 0.00 |
| A_52_P632691 | AK134496  | Zfp395    | 380912 | zinc finger protein 395                               | -1.95 | 0.26 | 0.03 |
| A_52_P488919 | NM_199025 | Zbtb26    | 320633 | zinc finger and BTB domain containing 26              | -3.88 | 0.26 | 0.00 |
| A_51_P251552 | NM_025864 | Tmem206   | 66950  | transmembrane protein 206                             | -4.52 | 0.26 | 0.00 |
| A_52_P537545 | NM_021491 | Smpd3     | 58994  | sphingomyelin phosphodiesterase 3, neutral            | -2.54 | 0.26 | 0.00 |
| A_51_P439612 | NM_020266 | Dnajb2    | 56812  | Dnaj (Hsp40) homolog, subfamily B, member 2           | -4.06 | 0.26 | 0.00 |
| A_52_P663666 | AK085506  | 4933404O1 | 66752  | RIKEN cDNA 4933404O12 gene                            | -3.64 | 0.26 | 0.00 |
| A_51_P423431 | NM_027838 | Senp8     | 71599  | SUMO/sentrin specific peptidase 8                     | -4.88 | 0.26 | 0.00 |
| A_51_P267080 | NM_138302 | Tymp      | 72962  | thymidine phosphorylase                               | -2.94 | 0.26 | 0.00 |
| A_51_P505521 | BF467941  | Hist1h4i  | 319158 | histone cluster 1, H4i                                | -2.47 | 0.26 | 0.00 |

|              |           |           |        |                                                                                       |       |      |      |
|--------------|-----------|-----------|--------|---------------------------------------------------------------------------------------|-------|------|------|
| A_52_P15197  | NM_001024 | Dcun1d2   | 102323 | DCN1, defective in cullin neddylation 1, domain containing 2 ( <i>S. cerevisiae</i> ) | -4.91 | 0.26 | 0.00 |
| A_51_P221651 | NM_023341 | Cabc1     | 67426  | chaperone, ABC1 activity of bc1 complex like ( <i>S. pombe</i> )                      | -3.63 | 0.26 | 0.00 |
| A_52_P204744 | NM_019421 | Cd320     | 54219  | CD320 antigen                                                                         | -4.80 | 0.26 | 0.00 |
| A_51_P510722 | NM_029096 | 1110008J0 | 100764 | RIKEN cDNA 1110008J03 gene                                                            | -5.45 | 0.26 | 0.00 |
| A_51_P246690 | NM_020329 | Dolpp1    | 57170  | dolichyl pyrophosphate phosphatase 1                                                  | -4.60 | 0.26 | 0.00 |
| A_51_P170207 | NM_144888 | Mavs      | 228607 | mitochondrial antiviral signaling protein                                             | -4.48 | 0.26 | 0.00 |
| A_51_P286327 | NM_175646 | Txnl4b    | 234723 | thioredoxin-like 4B                                                                   | -4.42 | 0.26 | 0.00 |
| A_52_P244682 | NM_145509 | 5430435G2 | 226421 | RIKEN cDNA 5430435G22 gene                                                            | -2.67 | 0.25 | 0.00 |
| A_52_P251183 | NM_175106 | Tmem177   | 66343  | transmembrane protein 177                                                             | -4.73 | 0.25 | 0.00 |
| A_52_P555537 | AK035703  | 2810008D0 | 76972  | RIKEN cDNA 2810008D09 gene                                                            | -3.79 | 0.25 | 0.00 |
| A_52_P354509 | NM_144810 | Klhdc8a   | 213417 | kelch domain containing 8A                                                            | -3.99 | 0.25 | 0.00 |
| A_51_P150044 | NM_009097 | Rps6ka1   | 20111  | ribosomal protein S6 kinase polypeptide 1                                             | -4.61 | 0.25 | 0.00 |
| A_51_P398887 | NM_031251 | Ctns      | 83429  | cystinosis, nephropathic                                                              | -4.70 | 0.25 | 0.00 |
| A_52_P567905 | NM_010957 | Ogg1      | 18294  | 8-oxoguanine DNA-glycosylase 1                                                        | -4.00 | 0.25 | 0.00 |
| A_52_P77204  | NM_153542 | Lrrc20    | 216011 | leucine rich repeat containing 20                                                     | -4.23 | 0.25 | 0.00 |
| A_52_P670812 | AK002304  | Snord123  | 66835  | small nucleolar RNA, C/D box 123                                                      | -3.00 | 0.25 | 0.00 |
| A_51_P290207 | NM_153526 | Insig1    | 231070 | insulin induced gene 1                                                                | -4.01 | 0.25 | 0.00 |
| A_51_P394471 | NM_011548 | Tcf3      | 21423  | transcription factor 3                                                                | -3.97 | 0.25 | 0.00 |
| A_51_P372141 | NM_001039 | Pnkd      | 56695  | paroxysmal nonkinesinogenic dyskinesia                                                | -3.40 | 0.25 | 0.00 |
| A_52_P551603 | NM_172681 | D930015E0 | 229473 | RIKEN cDNA D930015E06 gene                                                            | -4.67 | 0.25 | 0.00 |
| A_52_P440599 | NM_023622 | Rgl3      | 71746  | ral guanine nucleotide dissociation stimulator-like 3                                 | -3.46 | 0.25 | 0.00 |
| A_52_P129867 | NM_177244 | Fastkd1   | 320720 | FAST kinase domains 1                                                                 | -3.59 | 0.25 | 0.00 |
| A_51_P181448 | NM_009737 | Bcat2     | 12036  | branched chain aminotransferase 2, mitochondrial                                      | -3.89 | 0.25 | 0.00 |
| A_52_P367055 | NM_021499 | Wdr8      | 59002  | WD repeat domain 8                                                                    | -4.41 | 0.25 | 0.00 |
| A_51_P240986 | NM_198604 | Plekhg6   | 213522 | RhoGef domain) member 6                                                               | -3.39 | 0.25 | 0.00 |
| A_52_P54569  | AK160679  | Dcaf17    | 75763  | DDB1 and CUL4 associated factor 17                                                    | -3.83 | 0.25 | 0.00 |
| A_51_P116906 | NM_144850 | Rapgef3   | 223864 | Rap guanine nucleotide exchange factor (GEF) 3                                        | -2.99 | 0.25 | 0.00 |
| A_52_P450934 | NM_198414 | Paqr9     | 75552  | progesterin and adipoQ receptor family member IX                                      | -3.48 | 0.25 | 0.00 |
| A_51_P314517 | NM_030697 | Kank3     | 80880  | KN motif and ankyrin repeat domains 3                                                 | -4.63 | 0.25 | 0.00 |

|              |           |           |        |                                                                               |       |      |      |
|--------------|-----------|-----------|--------|-------------------------------------------------------------------------------|-------|------|------|
| A_51_P123795 | NM_177684 | Zfp637    | 232337 | zinc finger protein 637                                                       | -4.56 | 0.25 | 0.00 |
| A_51_P279100 | NM_008969 | Ptgs1     | 19224  | prostaglandin-endoperoxide synthase 1                                         | -3.90 | 0.25 | 0.00 |
| A_51_P420806 | NM_011675 | Uck1      | 22245  | uridine-cytidine kinase 1                                                     | -4.24 | 0.25 | 0.00 |
| A_51_P511560 | NM_001033 | Acsl3     | 74205  | acyl-CoA synthetase long-chain family member 3                                | -4.11 | 0.25 | 0.00 |
| A_52_P262275 | NM_009125 | Atxn2     | 20239  | ataxin 2                                                                      | -3.15 | 0.25 | 0.00 |
| A_52_P253230 | NM_175134 | Ankrd46   | 68839  | ankyrin repeat domain 46                                                      | -4.07 | 0.25 | 0.00 |
| A_51_P314045 | NM_027171 | 2310057J1 | 69697  | RIKEN cDNA 2310057J16 gene                                                    | -4.67 | 0.25 | 0.00 |
| A_51_P502092 | BC024137  | BC024137  | 234757 | cDNA sequence BC024137                                                        | -3.14 | 0.25 | 0.00 |
| A_51_P155638 | NM_027987 | Cd300lg   | 52685  | CD300 antigen like family member G                                            | -5.06 | 0.25 | 0.00 |
| A_52_P328304 | NM_153804 | Plekhg3   | 263406 | pleckstrin homology domain containing, family G (with RhoGef domain) member 3 | -3.88 | 0.25 | 0.00 |
| A_52_P139740 | NM_023397 | Mdp1      | 67881  | magnesium-dependent phosphatase 1                                             | -4.09 | 0.25 | 0.00 |
| A_51_P317317 | NM_172116 | Pddc1     | 213350 | Parkinson disease 7 domain containing 1                                       | -3.65 | 0.25 | 0.00 |
| A_51_P497768 | XM_130488 | NA        | NA     | NA                                                                            | -3.48 | 0.25 | 0.00 |
| A_51_P290981 | NM_007824 | Cyp7a1    | 13122  | cytochrome P450, family 7, subfamily a, polypeptide 1                         | -2.88 | 0.25 | 0.00 |
| A_51_P156547 | NM_001079 | Tcf7l1    | 21415  | transcription factor 7-like 1 (T-cell specific, HMG box)                      | -4.47 | 0.25 | 0.00 |
| A_51_P281433 | NM_024451 | Sun1      | 77053  | Sad1 and UNC84 domain containing 1                                            | -4.26 | 0.25 | 0.00 |
| A_51_P360622 | NM_144917 | Elmod3    | 232089 | ELMO/CED-12 domain containing 3                                               | -3.64 | 0.25 | 0.00 |
| A_51_P502993 | NM_027480 | Ankrd24   | 70615  | ankyrin repeat domain 24                                                      | -3.29 | 0.25 | 0.00 |
| A_51_P205326 | NM_177743 | Fam198a   | 245050 | family with sequence similarity 198, member A                                 | -3.26 | 0.25 | 0.00 |
| A_52_P621603 | NM_009450 | Tubb2a    | 22151  | tubulin, beta 2A                                                              | -3.80 | 0.25 | 0.00 |
| A_51_P489488 | NM_001039 | Pde4dip   | 83679  | phosphodiesterase 4D interacting protein (myomegalin)                         | -3.64 | 0.25 | 0.00 |
| A_51_P179688 | NM_026327 | 1810048J1 | 67708  | RIKEN cDNA 1810048J11 gene                                                    | -4.53 | 0.25 | 0.00 |
| A_51_P375227 | NM_009954 | Bcar1     | 12927  | breast cancer anti-estrogen resistance 1                                      | -3.78 | 0.25 | 0.00 |
| A_51_P127279 | NM_133858 | Fam63a    | 75007  | family with sequence similarity 63, member A                                  | -3.95 | 0.25 | 0.00 |
| A_52_P430267 | NM_020331 | Gtf2ird1  | 57080  | general transcription factor II I repeat domain-containing 1                  | -4.65 | 0.25 | 0.00 |
| A_52_P513123 | NM_177372 | Dna2      | 327762 | DNA replication helicase 2 homolog (yeast)                                    | -3.07 | 0.25 | 0.00 |
| A_51_P475785 | NM_207264 | BC052040  | 399568 | cDNA sequence BC052040                                                        | -4.00 | 0.25 | 0.00 |
| A_51_P121325 | NM_025578 | Mrps25    | 64658  | mitochondrial ribosomal protein S25                                           | -3.87 | 0.25 | 0.00 |
| A_52_P204331 | NM_178727 | D630039A0 | 242484 | RIKEN cDNA D630039A03 gene                                                    | -3.76 | 0.25 | 0.00 |

|              |           |           |        |                                                          |       |      |      |
|--------------|-----------|-----------|--------|----------------------------------------------------------|-------|------|------|
| A_51_P516125 | BC013561  | NA        | NA     | NA                                                       | -3.29 | 0.25 | 0.00 |
| A_51_P173961 | NM_178939 | Pdrg1     | 68559  | p53 and DNA damage regulated 1                           | -4.15 | 0.25 | 0.00 |
| A_51_P314285 | NM_026436 | Tmem86a   | 67893  | transmembrane protein 86A                                | -3.59 | 0.24 | 0.00 |
| A_51_P145402 | NM_009446 | Tuba3a    | 22144  | tubulin, alpha 3A                                        | -4.25 | 0.24 | 0.00 |
| A_51_P417053 | NM_011656 | Tuft1     | 22156  | tuftelin 1                                               | -3.98 | 0.24 | 0.00 |
| A_51_P335051 | NM_016668 | Bhmt      | 12116  | betaine-homocysteine methyltransferase                   | -2.78 | 0.24 | 0.00 |
| A_51_P434017 | NM_133903 | Spon2     | 100689 | spondin 2, extracellular matrix protein                  | -3.98 | 0.24 | 0.00 |
| A_51_P265338 | NM_011850 | Nr0b2     | 23957  | nuclear receptor subfamily 0, group B, member 2          | -2.67 | 0.24 | 0.00 |
| A_52_P326657 | NM_182783 | Fam167b   | 230766 | family with sequence similarity 167, member B            | -4.31 | 0.24 | 0.00 |
| A_51_P400016 | AK088732  | Kalrn     | 545156 | kalirin, RhoGEF kinase                                   | -3.46 | 0.24 | 0.00 |
| A_51_P346722 | NM_013865 | Ndr3      | 29812  | N-myc downstream regulated gene 3                        | -3.95 | 0.24 | 0.00 |
| A_51_P244504 | NM_028184 | Oraov1    | 72284  | oral cancer overexpressed 1                              | -4.44 | 0.24 | 0.00 |
| A_52_P101238 | AK083460  | B230354K1 | 320063 | RIKEN cDNA B230354K17 gene                               | -4.33 | 0.24 | 0.00 |
| A_51_P256384 | NM_009723 | Atp2b2    | 11941  | ATPase, Ca <sup>++</sup> transporting, plasma membrane 2 | -4.14 | 0.24 | 0.00 |
| A_52_P50474  | NM_198652 | Hjurp     | 381280 | Holliday junction recognition protein                    | -3.51 | 0.24 | 0.00 |
| A_52_P112676 | NM_025455 | Ccdc28b   | 66264  | coiled coil domain containing 28B                        | -4.78 | 0.24 | 0.00 |
| A_51_P299432 | NM_026670 | Zmym1     | 68310  | zinc finger, MYM domain containing 1                     | -3.45 | 0.24 | 0.00 |
| A_51_P424990 | NM_173427 | Klhdc7a   | 242721 | kelch domain containing 7A                               | -2.64 | 0.24 | 0.00 |
| A_51_P121275 | NM_134046 | Cenpo     | 52504  | centromere protein O                                     | -3.70 | 0.24 | 0.00 |
| A_52_P569067 | NM_023556 | Mvk       | 17855  | mevalonate kinase                                        | -4.39 | 0.24 | 0.00 |
| A_52_P554703 | NM_183183 | Gprn3     | 243385 | GPRIN family member 3                                    | -2.79 | 0.24 | 0.00 |
|              |           |           |        | leucine rich repeat containing G protein coupled         |       |      |      |
| A_51_P218091 | NM_010195 | Lgr5      | 14160  | receptor 5                                               | -4.37 | 0.24 | 0.00 |
| A_51_P482951 | NM_010236 | Fpgs      | 14287  | folylpolyglutamyl synthetase                             | -3.35 | 0.24 | 0.00 |
| A_52_P478025 | NM_021491 | Smpd3     | 58994  | sphingomyelin phosphodiesterase 3, neutral               | -2.46 | 0.24 | 0.00 |
| A_51_P478952 | NM_133898 | N4bp2l1   | 100637 | NEDD4 binding protein 2-like 1                           | -3.52 | 0.24 | 0.00 |
| A_51_P178575 | AF269193  | Brd3      | 67382  | bromodomain containing 3                                 | -4.37 | 0.24 | 0.00 |
|              |           |           |        | general transcription factor II I repeat domain-         |       |      |      |
| A_51_P381522 | NM_020331 | Gtf2ird1  | 57080  | containing 1                                             | -3.45 | 0.24 | 0.00 |
|              |           |           |        | nudix (nucleoside diphosphate linked moiety X)-type      |       |      |      |
| A_52_P434570 | NM_025839 | Nudt16l1  | 66911  | motif 16-like 1                                          | -5.25 | 0.24 | 0.00 |
| A_52_P64783  | AK032172  | Pabpn1    | 54196  | poly(A) binding protein, nuclear 1                       | -3.85 | 0.24 | 0.00 |
| A_51_P430678 | AK004405  | Xrcc6bp1  | 68876  | XRCC6 binding protein 1                                  | -3.90 | 0.24 | 0.00 |
| A_51_P234330 | NM_133641 | Rtkn      | 20166  | rhotekin                                                 | -4.28 | 0.23 | 0.00 |

|               |           |           |        |                                                              |       |      |      |
|---------------|-----------|-----------|--------|--------------------------------------------------------------|-------|------|------|
| A_51_P360840  | NM_009569 | Zfpm1     | 22761  | zinc finger protein, multitype 1                             | -3.72 | 0.23 | 0.00 |
| A_52_P1020025 | AK052002  | NA        | NA     | NA                                                           | -2.38 | 0.23 | 0.01 |
| A_52_P430266  | NM_020331 | Gtf2ird1  | 57080  | general transcription factor II I repeat domain-containing 1 | -5.16 | 0.23 | 0.00 |
| A_51_P476851  | AK172283  | Fance     | 72775  | Fanconi anemia, complementation group E                      | -4.71 | 0.23 | 0.00 |
| A_51_P133870  | NM_027248 | Zfp219    | 69890  | zinc finger protein 219                                      | -4.10 | 0.23 | 0.00 |
| A_51_P150905  | NM_145479 | Klhl22    | 224023 | kelch-like 22 (Drosophila)                                   | -3.90 | 0.23 | 0.00 |
| A_51_P452798  | NM_025324 | Zfp524    | 66056  | zinc finger protein 524                                      | -4.67 | 0.23 | 0.00 |
| A_51_P146432  | NM_175392 | Fam73b    | 108958 | family with sequence similarity 73, member B                 | -3.79 | 0.23 | 0.00 |
| A_51_P141554  | NM_011513 | Med22     | 20933  | mediator complex subunit 22                                  | -4.67 | 0.23 | 0.00 |
| A_51_P484009  | NM_007941 | Stx2      | 13852  | syntaxin 2                                                   | -4.16 | 0.23 | 0.00 |
| A_51_P401193  | NM_178389 | Gale      | 74246  | galactose-4-epimerase, UDP                                   | -2.96 | 0.23 | 0.00 |
| A_51_P200610  | NM_198886 | Zbtb12    | 193736 | zinc finger and BTB domain containing 12                     | -3.68 | 0.23 | 0.00 |
| A_52_P121502  | NM_026385 | Pllp      | 67801  | plasma membrane proteolipid                                  | -4.27 | 0.23 | 0.00 |
| A_52_P28651   | NM_021424 | Pvrl1     | 58235  | poliovirus receptor-related 1                                | -3.32 | 0.23 | 0.00 |
| A_52_P418602  | NM_207301 | Wrb       | 71446  | tryptophan rich basic protein                                | -4.08 | 0.23 | 0.00 |
| A_51_P173459  | NM_175538 | E130304F0 | 245269 | RIKEN cDNA E130304F04 gene                                   | -4.22 | 0.23 | 0.00 |
| A_51_P515018  | AK050378  | Hsd17b13  | 243168 | hydroxysteroid (17-beta) dehydrogenase 13                    | -2.68 | 0.23 | 0.00 |
| A_52_P572178  | AK122246  | D130043K2 | 210108 | RIKEN cDNA D130043K22 gene                                   | -3.51 | 0.23 | 0.00 |
| A_51_P331207  | NM_025464 | Tmem218   | 66279  | transmembrane protein 218                                    | -4.03 | 0.23 | 0.00 |
| A_51_P327491  | NM_007468 | Apoa4     | 11808  | apolipoprotein A-IV                                          | -3.06 | 0.23 | 0.00 |
| A_51_P392214  | AK136802  | 1810048J1 | 67708  | RIKEN cDNA 1810048J11 gene                                   | -3.83 | 0.23 | 0.00 |
| A_51_P445588  | NM_175133 | 1110038D1 | 68778  | RIKEN cDNA 1110038D17 gene                                   | -4.27 | 0.23 | 0.00 |
| A_51_P120254  | NM_015821 | Fbxl8     | 50788  | F-box and leucine-rich repeat protein 8                      | -4.92 | 0.23 | 0.00 |
| A_51_P265824  | NM_008245 | Hhex      | 15242  | hematopoietically expressed homeobox                         | -4.17 | 0.23 | 0.00 |
| A_52_P422557  | XM_131700 | NA        | NA     | NA                                                           | -4.35 | 0.23 | 0.00 |
| A_51_P111513  | NA        | NA        | NA     | NA                                                           | -3.13 | 0.23 | 0.00 |
| A_52_P337259  | NM_013905 | Heyl      | 56198  | hairy/enhancer-of-split related with YRPW motif-like         | -3.70 | 0.23 | 0.00 |
| A_52_P218765  | NM_198664 | Tbc1d2    | 381605 | TBC1 domain family, member 2                                 | -3.49 | 0.23 | 0.00 |
| A_52_P168028  | NM_146006 | Lss       | 16987  | lanosterol synthase                                          | -3.23 | 0.23 | 0.00 |
| A_51_P301891  | NM_015801 | Pnpla6    | 50767  | patatin-like phospholipase domain containing 6               | -4.85 | 0.23 | 0.00 |
| A_51_P449624  | BC004768  | Hjurp     | 381280 | Holliday junction recognition protein                        | -3.28 | 0.23 | 0.00 |
| A_52_P93066   | XM_485838 | NA        | NA     | NA                                                           | -4.64 | 0.23 | 0.00 |

|              |           |          |        |                                                                                               |       |      |      |
|--------------|-----------|----------|--------|-----------------------------------------------------------------------------------------------|-------|------|------|
| A_51_P489903 | NM_010957 | Ogg1     | 18294  | 8-oxoguanine DNA-glycosylase 1                                                                | -4.03 | 0.23 | 0.00 |
| A_51_P420655 | NM_180588 | Reep4    | 72549  | receptor accessory protein 4                                                                  | -3.77 | 0.23 | 0.00 |
| A_51_P391367 | NM_031182 | Tcfap4   | 83383  | transcription factor AP4                                                                      | -5.05 | 0.23 | 0.00 |
| A_51_P124285 | NM_027280 | Nkd1     | 93960  | naked cuticle 1 homolog (Drosophila)                                                          | -4.73 | 0.23 | 0.00 |
| A_51_P195215 | NM_153535 | Fam149a  | 212326 | family with sequence similarity 149, member A                                                 | -4.58 | 0.23 | 0.00 |
| A_51_P300726 | NM_011014 | Sigmar1  | 18391  | sigma non-opioid intracellular receptor 1                                                     | -4.12 | 0.23 | 0.00 |
| A_51_P269216 | NM_030693 | Atf5     | 107503 | activating transcription factor 5                                                             | -4.63 | 0.23 | 0.00 |
| A_51_P315890 | NM_001033 | Kcnk6    | 52150  | potassium inwardly-rectifying channel, subfamily K, member 6                                  | -4.24 | 0.23 | 0.00 |
| A_52_P354752 | NM_146042 | Rnf144b  | 218215 | ring finger protein 144B                                                                      | -3.86 | 0.23 | 0.00 |
| A_51_P285271 | NM_001033 | Ccdc61   | 232933 | coiled-coil domain containing 61                                                              | -3.44 | 0.23 | 0.00 |
| A_51_P404413 | NM_009739 | Bckdk    | 12041  | branched chain ketoacid dehydrogenase kinase                                                  | -4.71 | 0.22 | 0.00 |
| A_51_P494481 | NM_172468 | Snx30    | 209131 | sorting nexin family member 30                                                                | -4.02 | 0.22 | 0.00 |
| A_51_P323521 | NM_133924 | Snx21    | 101113 | sorting nexin family member 21                                                                | -4.03 | 0.22 | 0.00 |
| A_51_P122290 | NM_027230 | Zmynd8   | 228880 | zinc finger, MYND-type containing 8                                                           | -5.14 | 0.22 | 0.00 |
| A_51_P106859 | NM_138721 | Lsm10    | 116748 | U7 snRNP-specific Sm-like protein LSM10                                                       | -5.76 | 0.22 | 0.00 |
| A_51_P290399 | NM_145489 | AI661453 | 224833 | expressed sequence AI661453                                                                   | -4.04 | 0.22 | 0.00 |
| A_52_P163796 | NM_011655 | Tubb5    | 22154  | tubulin, beta 5                                                                               | -5.15 | 0.22 | 0.00 |
| A_51_P497090 | BC021944  | Enho     | 69638  | energy homeostasis associated solute carrier family 40 (iron-regulated transporter), member 1 | -4.71 | 0.22 | 0.00 |
| A_51_P389988 | NM_016917 | Slc40a1  | 53945  |                                                                                               | -4.33 | 0.22 | 0.00 |
| A_52_P413492 | NM_145554 | Ldlrap1  | 100017 | low density lipoprotein receptor adaptor protein 1                                            | -5.09 | 0.22 | 0.00 |
| A_52_P65719  | BC034637  | NA       | NA     | NA                                                                                            | -3.05 | 0.22 | 0.00 |
| A_51_P418725 | NM_024413 | Plekhf1  | 72287  | pleckstrin homology domain containing, family F (with FYVE domain) member 1                   | -3.74 | 0.22 | 0.00 |
| A_51_P324871 | NM_201351 | Cybas3   | 225912 | cytochrome b, ascorbate dependent 3                                                           | -5.27 | 0.22 | 0.00 |
| A_51_P134253 | NM_172611 | Gramd4   | 223752 | GRAM domain containing 4                                                                      | -3.82 | 0.22 | 0.00 |
| A_52_P566665 | NM_025809 | Clec14a  | 66864  | C-type lectin domain family 14, member a                                                      | -4.81 | 0.22 | 0.00 |
| A_51_P439452 | NM_133748 | Insig2   | 72999  | insulin induced gene 2                                                                        | -3.91 | 0.22 | 0.00 |
| A_51_P501844 | NM_175475 | Cyp26b1  | 232174 | cytochrome P450, family 26, subfamily b, polypeptide 1                                        | -2.41 | 0.22 | 0.00 |
| A_52_P915194 | AK030494  | NA       | NA     | NA                                                                                            | -3.22 | 0.22 | 0.00 |
| A_51_P306892 | NM_145384 | Pq1c2    | 212555 | PQ loop repeat containing 2                                                                   | -5.04 | 0.22 | 0.00 |



|               |           |                 |        |                                                                        |       |      |      |
|---------------|-----------|-----------------|--------|------------------------------------------------------------------------|-------|------|------|
| A_51_P246471  | NM_017463 | Pbx2            | 18515  | pre B-cell leukemia transcription factor 2                             | -5.05 | 0.22 | 0.00 |
| A_52_P293222  | AK042378  | Ppargc1b        | 170826 | peroxisome proliferative activated receptor, gamma, coactivator 1 beta | -4.67 | 0.22 | 0.00 |
| A_51_P103659  | NM_009450 | Tubb2a          | 22151  | tubulin, beta 2A                                                       | -3.89 | 0.22 | 0.00 |
| A_51_P315849  | NA        | NA              | NA     | NA                                                                     | -4.37 | 0.22 | 0.00 |
| A_51_P339305  | NM_016812 | Banp            | 53325  | BTG3 associated nuclear protein                                        | -4.39 | 0.22 | 0.00 |
| A_51_P253320  | NM_134257 | Rgs3            | 50780  | regulator of G-protein signaling 3                                     | -3.50 | 0.22 | 0.00 |
| A_51_P263419  | NM_013705 | Zfp30           | 22693  | zinc finger protein 30                                                 | -4.31 | 0.22 | 0.00 |
| A_51_P328089  | NM_177638 | Crb3            | 224912 | crumbs homolog 3 (Drosophila)                                          | -5.06 | 0.22 | 0.00 |
| A_51_P367125  | NM_011131 | Pold1           | 18971  | polymerase (DNA directed), delta 1, catalytic subunit                  | -5.13 | 0.22 | 0.00 |
| A_52_P598278  | NM_146116 | Tubb2c          | 227613 | tubulin, beta 2C                                                       | -4.47 | 0.22 | 0.00 |
| A_51_P475995  | NM_178060 | Thra            | 21833  | thyroid hormone receptor alpha                                         | -4.12 | 0.21 | 0.00 |
| A_51_P261359  | NM_172692 | Gba2            | 230101 | glucosidase beta 2                                                     | -4.40 | 0.21 | 0.00 |
| A_52_P388072  | NM_145942 | Hmgcs1          | 208715 | 3-hydroxy-3-methylglutaryl-Coenzyme A synthase 1                       | -2.96 | 0.21 | 0.00 |
| A_52_P357402  | NM_019988 | Mlst8           | 56716  | MTOR associated protein, LST8 homolog (S. cerevisiae)                  | -5.00 | 0.21 | 0.00 |
| A_52_P552879  | NM_001025 | Efcab4a         | 213573 | EF-hand calcium binding domain 4A                                      | -4.87 | 0.21 | 0.00 |
| A_52_P60105   | NM_018822 | Sgsh            | 27029  | N-sulfoglucosamine sulfohydrolase (sulfamidase)                        | -4.05 | 0.21 | 0.00 |
| A_51_P375987  | NM_021716 | Fign            | 60344  | fidgetin                                                               | -4.62 | 0.21 | 0.00 |
| A_52_P1173329 | NA        | NA              | NA     | NA                                                                     | -4.42 | 0.21 | 0.00 |
| A_51_P320190  | XM_128010 | NA              | NA     | NA                                                                     | -4.22 | 0.21 | 0.00 |
| A_51_P397673  | NM_153565 | Pcsk9           | 100102 | proprotein convertase subtilisin/kexin type 9                          | -3.45 | 0.21 | 0.00 |
| A_52_P229997  | NM_013926 | Cbx8            | 30951  | chromobox homolog 8 (Drosophila Pc class)                              | -4.35 | 0.21 | 0.00 |
| A_51_P123066  | AK016133  | 4930555K1620121 |        | RIKEN cDNA 4930555K19 gene                                             | -5.12 | 0.21 | 0.00 |
| A_52_P173197  | NM_153459 | Dusp7           | 235584 | dual specificity phosphatase 7                                         | -3.78 | 0.21 | 0.00 |
| A_52_P296864  | AK014177  | 3110045C267303  |        | RIKEN cDNA 3110045C21 gene                                             | -3.00 | 0.21 | 0.00 |
| A_51_P251129  | NM_199018 | Stard8          | 236920 | START domain containing 8                                              | -3.71 | 0.21 | 0.00 |
| A_52_P459211  | AK044736  | A930038B1320323 |        | RIKEN cDNA A930038B10 gene                                             | -4.93 | 0.21 | 0.00 |
| A_51_P495379  | NM_177699 | Fhod1           | 234686 | formin homology 2 domain containing 1                                  | -3.25 | 0.21 | 0.00 |
| A_51_P357735  | NM_008382 | Inhbe           | 16326  | inhibin beta E                                                         | -2.77 | 0.21 | 0.00 |

|               |           |            |        |                                                                               |       |      |      |
|---------------|-----------|------------|--------|-------------------------------------------------------------------------------|-------|------|------|
| A_51_P294891  | NM_133249 | Ppargc1b   | 170826 | peroxisome proliferative activated receptor, gamma, coactivator 1 beta        | -3.92 | 0.21 | 0.00 |
| A_52_P550147  | NM_172463 | Sned1      | 208777 | sushi, nidogen and EGF-like domains 1                                         | -4.44 | 0.21 | 0.00 |
| A_51_P164987  | NM_001039 | Tmem120k   | 330189 | transmembrane protein 120B                                                    | -4.01 | 0.21 | 0.00 |
| A_51_P380750  | NM_009824 | Cbfa2t3    | 12398  | core-binding factor, runt domain, alpha subunit 2, translocated to, 3 (human) | -5.17 | 0.21 | 0.00 |
| A_52_P1029978 | NM_010688 | Lasp1      | 16796  | LIM and SH3 protein 1                                                         | -3.12 | 0.21 | 0.00 |
| A_52_P251672  | AK133157  | 6430548M08 | 234797 | RIKEN cDNA 6430548M08 gene                                                    | -4.98 | 0.21 | 0.00 |
| A_51_P280401  | NM_133986 | Tcta       | 102791 | T-cell leukemia translocation altered gene                                    | -4.90 | 0.21 | 0.00 |
| A_51_P453043  | NM_030210 | Aacs       | 78894  | acetoacetyl-CoA synthetase                                                    | -3.02 | 0.21 | 0.00 |
| A_52_P118161  | AK147680  | Lss        | 16987  | lanosterol synthase                                                           | -4.31 | 0.21 | 0.00 |
| A_51_P430973  | NM_027995 | Paqr7      | 71904  | progesterin and adipoQ receptor family member VII                             | -4.64 | 0.21 | 0.00 |
| A_51_P327496  | NA        | NA         | NA     | NA                                                                            | -2.94 | 0.21 | 0.00 |
| A_51_P289836  | NM_022880 | Slc29a1    | 63959  | solute carrier family 29 (nucleoside transporters), member 1                  | -3.87 | 0.21 | 0.00 |
| A_52_P495372  | NM_153796 | Peo1       | 226153 | progressive external ophthalmoplegia 1 (human)                                | -4.81 | 0.21 | 0.00 |
| A_51_P302626  | NM_009327 | Hnf1a      | 21405  | HNF1 homeobox A                                                               | -4.20 | 0.21 | 0.00 |
| A_51_P234692  | AK028745  | Neat1      | 66961  | nuclear paraspeckle assembly transcript 1 (non-protein coding)                | -3.82 | 0.20 | 0.00 |
| A_51_P225948  | NM_175483 | Snx33      | 235406 | sorting nexin 33                                                              | -3.39 | 0.20 | 0.00 |
| A_51_P469098  | NM_133215 | Mtmt4      | 170749 | myotubularin related protein 4                                                | -4.30 | 0.20 | 0.00 |
| A_52_P190506  | AK017820  | Mrpl15     | 27395  | mitochondrial ribosomal protein L15                                           | -3.95 | 0.20 | 0.00 |
| A_51_P456098  | NM_028223 | Tmem175    | 72392  | transmembrane protein 175                                                     | -5.24 | 0.20 | 0.00 |
| A_51_P471819  | M77003    | NA         | NA     | NA                                                                            | -4.16 | 0.20 | 0.00 |
| A_52_P235347  | NM_020013 | Fgf21      | 56636  | fibroblast growth factor 21                                                   | -1.31 | 0.20 | 0.40 |
| A_52_P85403   | NM_138753 | Hexim1     | 192231 | hexamethylene bis-acetamide inducible 1                                       | -4.62 | 0.20 | 0.00 |
| A_51_P480169  | NM_053190 | S1pr5      | 94226  | sphingosine-1-phosphate receptor 5                                            | -4.70 | 0.20 | 0.00 |
| A_51_P222566  | NM_025572 | 2610528J1  | 66451  | RIKEN cDNA 2610528J11 gene                                                    | -3.44 | 0.20 | 0.00 |
| A_52_P287550  | NM_133922 | Krba1      | 77827  | KRAB-A domain containing 1                                                    | -4.83 | 0.20 | 0.00 |
| A_51_P402393  | NM_178741 | Klhl8      | 246293 | kelch-like 8 (Drosophila)                                                     | -5.13 | 0.20 | 0.00 |
| A_51_P239750  | NM_008380 | Inhba      | 16323  | inhibin beta-A                                                                | -4.44 | 0.20 | 0.00 |
| A_52_P294253  | NM_011759 | Zfp41      | 22701  | zinc finger protein 41                                                        | -5.07 | 0.20 | 0.00 |
| A_51_P316935  | NM_145980 | 8430408G2  | 213393 | RIKEN cDNA 8430408G22 gene                                                    | -4.64 | 0.20 | 0.00 |

|              |           |           |        |                                                                                 |       |      |      |
|--------------|-----------|-----------|--------|---------------------------------------------------------------------------------|-------|------|------|
| A_51_P484718 | AK018051  | Dock8     | 76088  | dedicator of cytokinesis 8                                                      | -3.81 | 0.20 | 0.00 |
| A_51_P175758 | NM_026566 | 9430023L2 | 68118  | RIKEN cDNA 9430023L20 gene                                                      | -6.21 | 0.20 | 0.00 |
| A_52_P183368 | NM_011535 | Tbx3      | 21386  | T-box 3                                                                         | -4.08 | 0.20 | 0.00 |
| A_51_P211980 | NM_019492 | Rgs3      | 50780  | regulator of G-protein signaling 3                                              | -5.29 | 0.20 | 0.00 |
| A_51_P233954 | NM_001013 | Sesn1     | 140742 | sestrin 1                                                                       | -5.42 | 0.19 | 0.00 |
| A_51_P202623 | NM_028832 | Mterfd3   | 74238  | MTERF domain containing 3                                                       | -4.58 | 0.19 | 0.00 |
| A_52_P611213 | BC005604  | Dnajc28   | 246738 | Dnal (Hsp40) homolog, subfamily C, member 28                                    | -4.65 | 0.19 | 0.00 |
| A_51_P129464 | NM_009128 | Scd2      | 20250  | stearoyl-Coenzyme A desaturase 2                                                | -4.79 | 0.19 | 0.00 |
| A_51_P321126 | NM_007988 | Fasn      | 14104  | fatty acid synthase                                                             | -3.47 | 0.19 | 0.00 |
| A_51_P329332 | NM_054087 | Slc19a2   | 116914 | solute carrier family 19 (thiamine transporter), member 2                       | -4.80 | 0.19 | 0.00 |
| A_52_P419298 | NM_010688 | Lasp1     | 16796  | LIM and SH3 protein 1                                                           | -4.48 | 0.19 | 0.00 |
| A_52_P170985 | NM_172718 | Sgsm1     | 52850  | small G protein signaling modulator 1                                           | -3.00 | 0.19 | 0.00 |
| A_52_P558122 | NM_207677 | Dedd2     | 67379  | death effector domain-containing DNA binding protein 2                          | -5.22 | 0.19 | 0.00 |
| A_51_P284577 | NM_010489 | Hyal2     | 15587  | hyaluronoglucosaminidase 2                                                      | -3.83 | 0.19 | 0.00 |
| A_52_P593965 | AK077979  | Fdps      | 110196 | farnesyl diphosphate synthetase                                                 | -2.68 | 0.19 | 0.00 |
| A_52_P427024 | NM_010700 | Ldlr      | 16835  | low density lipoprotein receptor                                                | -3.70 | 0.19 | 0.00 |
| A_51_P446886 | AK033039  | 5730409E0 | 230757 | RIKEN cDNA 5730409E04Rik gene                                                   | -4.44 | 0.19 | 0.00 |
| A_51_P235816 | AF024519  | Tsc22d3   | 14605  | TSC22 domain family, member 3                                                   | -2.97 | 0.19 | 0.00 |
| A_52_P368167 | NM_028372 | Mblac2    | 72852  | metallo-beta-lactamase domain containing 2                                      | -4.79 | 0.19 | 0.00 |
| A_51_P383991 | NM_011129 | 4-Sep     | 18952  | septin 4                                                                        | -4.21 | 0.19 | 0.00 |
| A_51_P258766 | NM_176996 | Smo       | 319757 | smoothened homolog (Drosophila)                                                 | -4.12 | 0.19 | 0.00 |
| A_51_P388478 | NM_010110 | Efnb1     | 13641  | ephrin B1                                                                       | -5.62 | 0.19 | 0.00 |
| A_52_P93284  | NM_008506 | Mycl1     | 16918  | v-myc myelocytomatosis viral oncogene homolog 1, lung carcinoma derived (avian) | -4.85 | 0.19 | 0.00 |
| A_52_P497908 | BC065077  | Lhx6      | 16874  | LIM homeobox protein 6                                                          | -4.18 | 0.19 | 0.00 |
| A_52_P17556  | NM_134249 | Timd2     | 171284 | T-cell immunoglobulin and mucin domain containing 2                             | -4.30 | 0.19 | 0.00 |
| A_51_P275233 | AK147212  | Zbtb4     | 75580  | zinc finger and BTB domain containing 4                                         | -5.67 | 0.19 | 0.00 |
| A_52_P593680 | NM_174846 | Glyctk    | 235582 | glycerate kinase                                                                | -4.64 | 0.19 | 0.00 |
| A_51_P282630 | NM_030880 | Pacsin3   | 80708  | protein kinase C and casein kinase substrate in neurons 3                       | -5.41 | 0.19 | 0.00 |
| A_51_P372550 | BC023116  | Cgref1    | 68567  | cell growth regulator with EF hand domain 1                                     | -3.10 | 0.19 | 0.00 |

|              |                     |        |                                                                     |       |      |      |
|--------------|---------------------|--------|---------------------------------------------------------------------|-------|------|------|
| A_52_P381484 | NM_133903 Spon2     | 100689 | spondin 2, extracellular matrix protein                             | -3.87 | 0.19 | 0.00 |
| A_52_P382325 | NM_001039 Ahnak     | 66395  | AHNAK nucleoprotein (desmoyokin)                                    | -3.44 | 0.19 | 0.00 |
| A_51_P117236 | NM_009329 Zfp354a   | 21408  | zinc finger protein 354A                                            | -5.28 | 0.19 | 0.00 |
| A_52_P350616 | NM_145433 Mrm1      | 217038 | mitochondrial rRNA methyltransferase 1 homolog (S. cerevisiae)      | -4.66 | 0.19 | 0.00 |
| A_52_P265578 | NM_001013 Vmo1      | 327956 | vitelline membrane outer layer 1 homolog (chicken)                  | -4.23 | 0.19 | 0.00 |
| A_51_P133612 | NM_026014 Cdt1      | 67177  | chromatin licensing and DNA replication factor 1                    | -4.71 | 0.19 | 0.00 |
| A_51_P381683 | NM_007377 Aatk      | 11302  | apoptosis-associated tyrosine kinase                                | -4.87 | 0.19 | 0.00 |
| A_51_P296487 | NM_146006 Lss       | 16987  | lanosterol synthase                                                 | -3.53 | 0.19 | 0.00 |
| A_52_P226127 | NM_011805 Dido1     | 23856  | death inducer-obliterator 1                                         | -4.07 | 0.19 | 0.00 |
| A_52_P15122  | NM_178444 Egfl7     | 353156 | EGF-like domain 7                                                   | -5.72 | 0.19 | 0.00 |
| A_51_P438909 | NM_023317 Nde1      | 67203  | nuclear distribution gene E homolog 1 (A nidulans)                  | -4.36 | 0.18 | 0.00 |
| A_51_P414243 | NM_153540 C85492    | 215494 | expressed sequence C85492                                           | -4.37 | 0.18 | 0.00 |
| A_51_P495986 | NM_025508 Gmpr      | 66355  | guanosine monophosphate reductase                                   | -5.30 | 0.18 | 0.00 |
| A_51_P521176 | NM_025886 Rassf7    | 66985  | Ras association (RalGDS/AF-6) domain family (N-terminal) member 7   | -5.65 | 0.18 | 0.00 |
| A_51_P369516 | NM_025839 Nudt16l1  | 66911  | nudix (nucleoside diphosphate linked moiety X)-type motif 16-like 1 | -5.39 | 0.18 | 0.00 |
| A_51_P377557 | NM_029794 Cpsf4l    | 52670  | cleavage and polyadenylation specific factor 4-like                 | -3.83 | 0.18 | 0.00 |
| A_52_P258537 | NM_144883 5430407P1 | 227545 | RIKEN cDNA 5430407P10 gene                                          | -5.01 | 0.18 | 0.00 |
| A_51_P392223 | BC019573 1810048J1  | 67708  | RIKEN cDNA 1810048J11 gene                                          | -4.57 | 0.18 | 0.00 |
| A_51_P410703 | NM_133351 Prss8     | 76560  | protease, serine, 8 (prostasin)                                     | -3.10 | 0.18 | 0.00 |
| A_51_P221263 | NM_028710 Arsg      | 74008  | arylsulfatase G                                                     | -4.43 | 0.18 | 0.00 |
| A_51_P331900 | NM_016747 Dlg3      | 53310  | discs, large homolog 3 (Drosophila)                                 | -5.68 | 0.18 | 0.00 |
| A_52_P470150 | NM_016672 Ddc       | 13195  | dopa decarboxylase                                                  | -3.83 | 0.18 | 0.00 |
| A_52_P119947 | NM_153782 Fam20a    | 208659 | family with sequence similarity 20, member A                        | -5.32 | 0.18 | 0.00 |
| A_52_P307893 | NM_054051 Pip4k2b   | 108083 | phosphatidylinositol-5-phosphate 4-kinase, type II, beta            | -6.11 | 0.18 | 0.00 |
| A_51_P194004 | NM_174846 Glyctk    | 235582 | glycerate kinase                                                    | -4.78 | 0.18 | 0.00 |
| A_52_P516091 | NM_133792 Pla2g15   | 192654 | phospholipase A2, group XV                                          | -6.52 | 0.18 | 0.00 |

|              |           |           |                                                    |                                                              |       |      |      |
|--------------|-----------|-----------|----------------------------------------------------|--------------------------------------------------------------|-------|------|------|
|              |           |           | endonuclease/exonuclease/phosphatase family domain |                                                              |       |      |      |
| A_51_P317191 | NM_026189 | Eepd1     | 67484                                              | containing 1                                                 | -4.35 | 0.18 | 0.00 |
| A_51_P296517 | AK168488  | Esrp2     | 77411                                              | epithelial splicing regulatory protein 2                     | -4.56 | 0.18 | 0.00 |
| A_51_P277536 | NM_019444 | Ramp2     | 54409                                              | receptor (calcitonin) activity modifying protein 2           | -5.42 | 0.18 | 0.00 |
| A_51_P354609 | NM_145152 | Lrrc3     | 237387                                             | leucine rich repeat containing 3                             | -4.67 | 0.18 | 0.00 |
| A_51_P436727 | NM_177231 | Arrb1     | 109689                                             | arrestin, beta 1                                             | -4.60 | 0.18 | 0.00 |
| A_51_P245156 | NM_019506 | Gdf2      | 12165                                              | growth differentiation factor 2                              | -4.35 | 0.18 | 0.00 |
| A_52_P274496 | NM_183180 | Tspan18   | 241556                                             | tetraspanin 18                                               | -5.61 | 0.18 | 0.00 |
| A_52_P448266 | NM_009737 | Bcat2     | 12036                                              | branched chain aminotransferase 2, mitochondrial             | -5.31 | 0.18 | 0.00 |
| A_51_P443569 | NM_023431 | Mum1      | 68114                                              | melanoma associated antigen (mutated) 1                      | -5.38 | 0.17 | 0.00 |
| A_52_P663602 | NM_015733 | Casp9     | 12371                                              | caspase 9                                                    | -5.26 | 0.17 | 0.00 |
| A_51_P142450 | NM_027865 | Tmem25    | 71687                                              | transmembrane protein 25                                     | -3.48 | 0.17 | 0.00 |
| A_51_P235821 | NM_001077 | Tsc22d3   | 14605                                              | TSC22 domain family, member 3                                | -3.00 | 0.17 | 0.00 |
| A_52_P175518 | NM_001029 | Rilp      | 280408                                             | Rab interacting lysosomal protein                            | -4.41 | 0.17 | 0.00 |
| A_51_P310164 | AK013367  | 2810459M  | 72792                                              | RIKEN cDNA 2810459M11 gene                                   | -4.27 | 0.17 | 0.00 |
| A_52_P583031 | NM_033474 | Arvcf     | 11877                                              | armadillo repeat gene deleted in velo-cardio-facial syndrome | -4.87 | 0.17 | 0.00 |
| A_51_P430929 | NM_153782 | Fam20a    | 208659                                             | family with sequence similarity 20, member A                 | -6.03 | 0.17 | 0.00 |
| A_52_P484838 | NM_011266 | Rfxank    | 19727                                              | regulatory factor X-associated ankyrin-containing protein    | -5.24 | 0.17 | 0.00 |
| A_51_P448563 | NM_008663 | Myo7a     | 17921                                              | myosin VIIA                                                  | -5.20 | 0.17 | 0.00 |
| A_52_P32453  | AK011222  | 1110020A2 | 68531                                              | RIKEN cDNA 1110020A21 gene                                   | -4.11 | 0.17 | 0.00 |
| A_51_P342835 | NM_027909 | C2cd2l    | 71764                                              | C2 calcium-dependent domain containing 2-like                | -6.02 | 0.17 | 0.00 |
| A_51_P108489 | NM_008187 | Gtl3      | 14894                                              | gene trap locus 3                                            | -4.91 | 0.17 | 0.00 |
| A_52_P654565 | NM_199145 | 3110062M  | 78412                                              | RIKEN cDNA 3110062M04 gene                                   | -5.74 | 0.17 | 0.00 |
| A_51_P338728 | NM_001033 | Sdhaf1    | 68332                                              | succinate dehydrogenase complex assembly factor 1            | -5.36 | 0.17 | 0.00 |
| A_51_P208931 | NM_145974 | C330016O1 | 212706                                             | RIKEN cDNA C330016O10 gene                                   | -5.45 | 0.17 | 0.00 |
| A_51_P319289 | NM_027301 | Sdr9c7    | 70061                                              | 4short chain dehydrogenase/reductase family 9C, member 7     | -4.86 | 0.17 | 0.00 |
| A_51_P209372 | NM_025436 | Sc4mol    | 66234                                              | sterol-C4-methyl oxidase-like                                | -4.91 | 0.17 | 0.00 |
| A_51_P151362 | NM_028316 | Zfp444    | 72667                                              | zinc finger protein 444                                      | -6.23 | 0.17 | 0.00 |
| A_52_P432949 | XM_972868 | NA        | NA                                                 | NA                                                           | -3.48 | 0.16 | 0.00 |

|              |           |           |        |                                                          |       |      |      |
|--------------|-----------|-----------|--------|----------------------------------------------------------|-------|------|------|
| A_52_P183138 | NM_008668 | Nab2      | 17937  | Ngfi-A binding protein 2                                 | -5.30 | 0.16 | 0.00 |
| A_52_P627357 | NM_205536 | Elk3      | 13713  | ELK3, member of ETS oncogene family                      | -5.38 | 0.16 | 0.00 |
| A_51_P314397 | NM_024223 | Crip2     | 68337  | cysteine rich protein 2                                  | -4.19 | 0.16 | 0.00 |
| A_52_P284889 | NM_008860 | Prkcz     | 18762  | protein kinase C, zeta                                   | -5.04 | 0.16 | 0.00 |
| A_52_P305740 | NM_001013 | Rreb1     | 68750  | ras responsive element binding protein 1                 | -4.36 | 0.16 | 0.00 |
| A_51_P383194 | NM_008804 | Pde9a     | 18585  | phosphodiesterase 9A                                     | -5.83 | 0.16 | 0.00 |
| A_52_P633393 | NM_133687 | Cxxc5     | 67393  | CXXC finger 5                                            | -5.73 | 0.16 | 0.00 |
| A_51_P240693 | BC046968  | Tecpr1    | 70381  | tectonin beta-propeller repeat containing 1              | -5.35 | 0.16 | 0.00 |
| A_51_P407690 | NM_175195 | 3110056O  | 73218  | RIKEN cDNA 3110056O03 gene                               | -5.53 | 0.16 | 0.00 |
| A_51_P124784 | NM_153420 | Acpl2     | 235534 | acid phosphatase-like 2                                  | -5.19 | 0.16 | 0.00 |
| A_52_P629333 | NM_145608 | BC021891  | 234878 | cDNA sequence BC021891                                   | -6.17 | 0.16 | 0.00 |
| A_51_P337101 | NM_172448 | Rnf43     | 207742 | ring finger protein 43                                   | -4.61 | 0.16 | 0.00 |
| A_52_P618417 | NA        | NA        | NA     | NA                                                       | -5.37 | 0.16 | 0.00 |
| A_51_P204730 | NM_025892 | 1500031L0 | 66994  | RIKEN cDNA 1500031L02 gene                               | -5.00 | 0.16 | 0.00 |
| A_51_P391764 | NM_028763 | Cbx6      | 494448 | chromobox homolog 6                                      | -6.26 | 0.16 | 0.00 |
| A_51_P384230 | NM_013731 | Sgk2      | 27219  | serum/glucocorticoid regulated kinase 2                  | -3.70 | 0.16 | 0.00 |
| A_52_P211063 | NM_025415 | Cks2      | 66197  | CDC28 protein kinase regulatory subunit 2                | -4.91 | 0.16 | 0.00 |
| A_51_P202801 | NM_019875 | Abcb9     | 56325  | ATP-binding cassette, sub-family B (MDR/TAP), member 9   | -6.92 | 0.16 | 0.00 |
| A_51_P108131 | AK147212  | Zbtb4     | 75580  | zinc finger and BTB domain containing 4                  | -5.49 | 0.16 | 0.00 |
| A_51_P316553 | NM_010612 | Kdr       | 16542  | kinase insert domain protein receptor                    | -5.53 | 0.16 | 0.00 |
| A_52_P518997 | NM_010139 | Epha2     | 13836  | Eph receptor A2                                          | -4.21 | 0.15 | 0.00 |
| A_52_P670188 | NM_027301 | Sdr9c7    | 70061  | 4short chain dehydrogenase/reductase family 9C, member 7 | -3.90 | 0.15 | 0.00 |
| A_51_P474169 | NM_144883 | 5430407P1 | 227545 | RIKEN cDNA 5430407P10 gene                               | -4.09 | 0.15 | 0.00 |
| A_51_P167551 | NM_153584 | BC031353  | 235493 | cDNA sequence BC031353                                   | -3.70 | 0.15 | 0.00 |
| A_52_P247462 | NM_177351 | Agphd1    | 235386 | aminoglycoside phosphotransferase domain containing 1    | -5.86 | 0.15 | 0.00 |
| A_51_P208511 | NM_009924 | Cnr2      | 12802  | cannabinoid receptor 2 (macrophage)                      | -4.91 | 0.15 | 0.00 |
| A_51_P151862 | NM_144862 | Lims2     | 225341 | LIM and senescent cell antigen like domains 2            | -5.43 | 0.15 | 0.00 |
| A_51_P393469 | XM_001002 | Wdr81     | 192652 | WD repeat domain 81                                      | -6.39 | 0.15 | 0.00 |
| A_51_P406557 | XM_283952 | AI464131  | 329828 | expressed sequence AI464131                              | -5.15 | 0.15 | 0.00 |
| A_51_P486150 | NM_008756 | Ocln      | 18260  | occludin                                                 | -3.45 | 0.15 | 0.00 |

|              |           |          |        |                                                                                                                      |       |      |      |
|--------------|-----------|----------|--------|----------------------------------------------------------------------------------------------------------------------|-------|------|------|
| A_51_P266618 | NM_010012 | Cyp8b1   | 13124  | cytochrome P450, family 8, subfamily b, polypeptide 1                                                                | -3.74 | 0.15 | 0.00 |
| A_51_P370315 | NM_011937 | Gnpda1   | 26384  | glucosamine-6-phosphate deaminase 1                                                                                  | -4.55 | 0.15 | 0.00 |
| A_51_P456208 | NM_011575 | Tff3     | 21786  | trefoil factor 3, intestinal                                                                                         | -1.64 | 0.15 | 0.11 |
| A_52_P259537 | NM_010292 | Gck      | 103988 | glucokinase                                                                                                          | -3.36 | 0.15 | 0.00 |
| A_51_P202950 | AK010701  | Dedd2    | 67379  | death effector domain-containing DNA binding protein 2                                                               | -6.06 | 0.15 | 0.00 |
| A_52_P221887 | NM_175099 | Repin1   | 58887  | replication initiator 1                                                                                              | -6.65 | 0.15 | 0.00 |
| A_51_P103237 | NM_015755 | Hunk     | 26559  | hormonally upregulated Neu-associated kinase                                                                         | -5.18 | 0.15 | 0.00 |
| A_51_P372186 | NM_020589 | Zfp467   | 68910  | zinc finger protein 467                                                                                              | -7.04 | 0.15 | 0.00 |
| A_51_P315925 | NM_020013 | Fgf21    | 56636  | fibroblast growth factor 21                                                                                          | -3.14 | 0.14 | 0.00 |
| A_52_P622471 | NM_001001 | Dab2ip   | 69601  | disabled homolog 2 (Drosophila) interacting protein acidic (leucine-rich) nuclear phosphoprotein 32 family, member A | -5.66 | 0.14 | 0.00 |
| A_51_P399071 | NM_009672 | Anp32a   | 11737  | peroxisome proliferative activated receptor, gamma, coactivator 1 beta                                               | -5.15 | 0.14 | 0.00 |
| A_52_P526724 | NM_133249 | Ppargc1b | 170826 | splA/ryanodine receptor domain and SOCS box containing 2                                                             | -3.91 | 0.14 | 0.00 |
| A_51_P410101 | NM_013539 | Spsb2    | 14794  | containing 2                                                                                                         | -5.86 | 0.14 | 0.00 |
| A_51_P420726 | NM_028372 | Mblac2   | 72852  | metallo-beta-lactamase domain containing 2                                                                           | -6.03 | 0.14 | 0.00 |
| A_52_P424826 | NM_175646 | Txnl4b   | 234723 | thioredoxin-like 4B                                                                                                  | -6.55 | 0.14 | 0.00 |
| A_51_P202954 | NM_207677 | Dedd2    | 67379  | death effector domain-containing DNA binding protein 2                                                               | -5.38 | 0.14 | 0.00 |
| A_51_P146941 | NM_145942 | Hmgcs1   | 208715 | 3-hydroxy-3-methylglutaryl-Coenzyme A synthase 1                                                                     | -4.37 | 0.14 | 0.00 |
| A_52_P100252 | NM_007988 | Fasn     | 14104  | fatty acid synthase                                                                                                  | -3.46 | 0.14 | 0.00 |
| A_52_P740427 | XM_890672 | NA       | NA     | NA                                                                                                                   | -3.26 | 0.14 | 0.00 |
| A_52_P175242 | AK141842  | Irs1     | 16367  | insulin receptor substrate 1                                                                                         | -3.05 | 0.14 | 0.00 |
| A_51_P157902 | NM_009902 | Cldn3    | 12739  | claudin 3                                                                                                            | -4.87 | 0.14 | 0.00 |
| A_51_P166155 | NM_020567 | Gmnn     | 57441  | geminin                                                                                                              | -6.08 | 0.14 | 0.00 |
| A_51_P355753 | NM_010430 | Hic1     | 15248  | hypermethylated in cancer 1                                                                                          | -6.82 | 0.14 | 0.00 |
| A_51_P349727 | NM_134154 | Slc25a45 | 107375 | solute carrier family 25, member 45                                                                                  | -6.82 | 0.14 | 0.00 |
| A_52_P401614 | NM_175289 | NA       | NA     | NA                                                                                                                   | -4.92 | 0.14 | 0.00 |
| A_51_P341369 | NM_025861 | Pq1c1    | 66943  | PQ loop repeat containing 1                                                                                          | -6.52 | 0.14 | 0.00 |

|              |           |           |                                             |                                                           |       |      |      |
|--------------|-----------|-----------|---------------------------------------------|-----------------------------------------------------------|-------|------|------|
|              |           |           | haloacid dehalogenase-like hydrolase domain |                                                           |       |      |      |
| A_51_P465582 | NM_024257 | Hdhd3     | 72748                                       | containing 3                                              | -5.58 | 0.14 | 0.00 |
| A_51_P516085 | NM_009345 | Dntt      | 21673                                       | deoxynucleotidyltransferase, terminal                     | -3.66 | 0.14 | 0.00 |
| A_51_P230439 | NM_008905 | Ppfibp2   | 19024                                       | PTPRF interacting protein, binding protein 2 (liprin beta | -4.56 | 0.13 | 0.00 |
| A_52_P384394 | NM_138313 | Bmf       | 171543                                      | 2)                                                        | -4.38 | 0.13 | 0.00 |
| A_51_P234788 | NM_133687 | Cxxc5     | 67393                                       | BCL2 modifying factor                                     | -5.96 | 0.13 | 0.00 |
| A_52_P659312 | NM_145134 | Spsb4     | 211949                                      | CXXC finger 5                                             | -6.37 | 0.13 | 0.00 |
| A_51_P520936 | NM_013867 | Bcar3     | 29815                                       | spla/ryanodine receptor domain and SOCS box               | -6.14 | 0.13 | 0.00 |
| A_52_P193236 | NM_028056 | 1600002HC | 72016                                       | containing 4                                              | -5.29 | 0.13 | 0.00 |
| A_52_P61864  | NM_023653 | Wnt2      | 22413                                       | breast cancer anti-estrogen resistance 3                  | -6.10 | 0.13 | 0.00 |
| A_51_P308029 | NM_027251 | 2010107G2 | 69894                                       | RIKEN cDNA 1600002H07 gene                                | -5.27 | 0.13 | 0.00 |
| A_51_P432420 | NM_009734 | Azi1      | 12009                                       | wingless-related MMTV integration site 2                  | -5.55 | 0.12 | 0.00 |
| A_51_P490023 | NM_009450 | Tubb2a    | 22151                                       | RIKEN cDNA 2010107G23 gene                                | -4.67 | 0.12 | 0.00 |
| A_52_P514352 | NM_021542 | Kcnk5     | 16529                                       | 5-azacytidine induced gene 1                              | -5.10 | 0.12 | 0.00 |
| A_52_P668514 | AK031324  | Kank2     | 235041                                      | tubulin, beta 2A                                          | -5.55 | 0.12 | 0.00 |
| A_51_P324633 | NM_007703 | Elov13    | 12686                                       | potassium channel, subfamily K, member 5                  | -4.23 | 0.12 | 0.00 |
| A_52_P596115 | NA        | NA        | NA                                          | KN motif and ankyrin repeat domains 2                     | -7.05 | 0.12 | 0.00 |
| A_51_P157083 | NM_008086 | Gas1      | 14451                                       | elongation of very long chain fatty acids (FEN1/Elo2,     | -3.83 | 0.12 | 0.00 |
| A_51_P396917 | NM_026752 | Zfyve21   | 68520                                       | SUR4/Elo3, yeast)-like 3                                  | -6.71 | 0.12 | 0.00 |
| A_51_P183205 | NM_172615 | 1700021K1 | 224118                                      | growth arrest specific 1                                  | -7.75 | 0.12 | 0.00 |
| A_51_P404193 | NM_022435 | Sp5       | 64406                                       | zinc finger, FYVE domain containing 21                    | -5.96 | 0.12 | 0.00 |
| A_52_P622641 | NM_008905 | Ppfibp2   | 19024                                       | RIKEN cDNA 1700021K19 gene                                | -6.44 | 0.12 | 0.00 |
| A_51_P328333 | NM_007634 | Ccnf      | 12449                                       | trans-acting transcription factor 5                       | -3.78 | 0.12 | 0.00 |
| A_52_P288251 | NM_001001 | Tmem204   | 407831                                      | PTPRF interacting protein, binding protein 2 (liprin beta | -6.03 | 0.12 | 0.00 |
| A_51_P491916 | NM_028478 | Rassf6    | 73246                                       | 2)                                                        | -7.58 | 0.12 | 0.00 |
| A_51_P488554 | NM_026543 | 3010026O0 | 68067                                       | cyclin F                                                  | -6.91 | 0.12 | 0.00 |
| A_51_P363749 | NM_016851 | Irf6      | 54139                                       | transmembrane protein 204                                 | -7.73 | 0.12 | 0.00 |
| A_52_P676271 | NM_009447 | Tuba4a    | 22145                                       | Ras association (RalGDS/AF-6) domain family member 6      | -7.42 | 0.12 | 0.00 |
| A_51_P488991 | NM_178644 | Oaf       | 102644                                      | RIKEN cDNA 3010026O09 gene                                | -4.45 | 0.12 | 0.00 |
|              |           |           |                                             | interferon regulatory factor 6                            |       |      |      |
|              |           |           |                                             | tubulin, alpha 4A                                         |       |      |      |
|              |           |           |                                             | OAF homolog (Drosophila)                                  |       |      |      |



|              |           |                |        |                                                       |       |      |      |
|--------------|-----------|----------------|--------|-------------------------------------------------------|-------|------|------|
| A_51_P183261 | NM_007474 | Aqp8           | 11833  | aquaporin 8                                           | -5.24 | 0.12 | 0.00 |
| A_52_P94401  | NM_177708 | Rtn4rl1        | 237847 | reticulon 4 receptor-like 1                           | -4.95 | 0.12 | 0.00 |
| A_51_P211786 | XM_978459 | Chst13         | 71797  | carbohydrate (chondroitin 4) sulfotransferase 13      | -6.25 | 0.12 | 0.00 |
| A_52_P629748 | NM_175263 | Notum          | 77583  | notum pectinacylesterase homolog (Drosophila)         | -7.81 | 0.11 | 0.00 |
| A_51_P234407 | NM_013769 | Tjp3           | 27375  | tight junction protein 3                              | -5.79 | 0.11 | 0.00 |
| A_52_P804224 | AK141415  | Camk1d         | 227541 | calcium/calmodulin-dependent protein kinase ID        | -5.23 | 0.11 | 0.00 |
| A_52_P20727  | NM_175340 | Nhlrc1         | 105193 | NHL repeat containing 1                               | -6.66 | 0.11 | 0.00 |
| A_51_P286131 | NM_030021 | D730039F177996 |        | RIKEN cDNA D730039F16 gene                            | -5.95 | 0.11 | 0.00 |
| A_51_P442759 | NM_172520 | Arhgef19       | 213649 | Rho guanine nucleotide exchange factor (GEF) 19       | -6.20 | 0.11 | 0.00 |
| A_51_P293339 | NM_009427 | Tob1           | 22057  | transducer of ErbB-2.1                                | -5.56 | 0.11 | 0.00 |
| A_51_P193490 | NM_145564 | Fbxo21         | 231670 | F-box protein 21                                      | -5.45 | 0.11 | 0.00 |
| A_51_P223776 | NM_145434 | Nr1d1          | 217166 | nuclear receptor subfamily 1, group D, member 1       | -4.85 | 0.11 | 0.00 |
| A_51_P462249 | NM_025415 | Cks2           | 66197  | CDC28 protein kinase regulatory subunit 2             | -6.69 | 0.11 | 0.00 |
| A_52_P531610 | AK030395  | Agxt2l1        | 71760  | alanine-glyoxylate aminotransferase 2-like 1          | -4.22 | 0.11 | 0.00 |
| A_51_P346893 | NM_019578 | Extl1          | 56219  | exostoses (multiple)-like 1                           | -6.21 | 0.11 | 0.00 |
| A_52_P465828 | NM_028833 | lqce           | 74239  | IQ motif containing E                                 | -6.74 | 0.10 | 0.00 |
| A_51_P472274 | NM_009236 | Sox18          | 20672  | SRY-box containing gene 18                            | -4.60 | 0.10 | 0.00 |
| A_51_P248122 | NM_133234 | Bbc3           | 170770 | BCL2 binding component 3                              | -6.60 | 0.10 | 0.00 |
| A_52_P614777 | NM_032400 | Sucnr1         | 84112  | succinate receptor 1                                  | -4.49 | 0.10 | 0.00 |
| A_52_P356343 | NM_153574 | Fam13a         | 58909  | family with sequence similarity 13, member A          | -5.52 | 0.10 | 0.00 |
| A_52_P645855 | NM_175096 | Stbd1          | 52331  | starch binding domain 1                               | -6.15 | 0.10 | 0.00 |
| A_52_P89335  | NM_146260 | Tmie           | 20776  | transmembrane inner ear                               | -4.23 | 0.10 | 0.00 |
| A_52_P322421 | NM_007962 | Mpzl2          | 14012  | myelin protein zero-like 2                            | -6.79 | 0.10 | 0.00 |
| A_52_P151320 | NM_025566 | Tnfaip8l1      | 66443  | tumor necrosis factor, alpha-induced protein 8-like 1 | -7.44 | 0.09 | 0.00 |
| A_52_P13730  | NM_007623 | Cbx2           | 12416  | chromobox homolog 2 (Drosophila Pc class)             | -6.89 | 0.09 | 0.00 |
| A_51_P368823 | NM_010346 | Grb7           | 14786  | growth factor receptor bound protein 7                | -2.93 | 0.09 | 0.00 |
| A_51_P449824 | NM_028954 | NA             | NA     | NA                                                    | -3.61 | 0.09 | 0.00 |
| A_52_P409498 | NM_009447 | Tuba4a         | 22145  | tubulin, alpha 4A                                     | -7.34 | 0.09 | 0.00 |
| A_51_P494655 | XM_890672 | NA             | NA     | NA                                                    | -4.28 | 0.09 | 0.00 |
| A_52_P276397 | NM_009001 | Rab3a          | 19339  | RAB3A, member RAS oncogene family                     | -6.67 | 0.09 | 0.00 |
| A_52_P528600 | NM_008245 | Hhex           | 15242  | hematopoietically expressed homeobox                  | -5.54 | 0.09 | 0.00 |
| A_52_P48681  | NM_016674 | Cldn1          | 12737  | claudin 1                                             | -4.66 | 0.09 | 0.00 |

|              |           |           |        |                                                                                |       |      |      |
|--------------|-----------|-----------|--------|--------------------------------------------------------------------------------|-------|------|------|
| A_51_P327869 | NM_011199 | Pth1r     | 19228  | parathyroid hormone 1 receptor                                                 | -6.91 | 0.09 | 0.00 |
| A_51_P436068 | NM_007412 | Gpr182    | 11536  | G protein-coupled receptor 182                                                 | -6.51 | 0.08 | 0.00 |
| A_52_P478420 | AK086555  | Cyp2d22   | 56448  | cytochrome P450, family 2, subfamily d, polypeptide 22                         | -7.60 | 0.08 | 0.00 |
| A_51_P424868 | NM_026524 | Mid1ip1   | 68041  | Mid1 interacting protein 1 (gastrulation specific G12-like (zebrafish))        | -6.56 | 0.08 | 0.00 |
| A_51_P496074 | NM_178162 | Agfg2     | 231801 | ArfGAP with FG repeats 2                                                       | -7.78 | 0.08 | 0.00 |
| A_51_P126198 | NM_010019 | Dapk2     | 13143  | death-associated protein kinase 2                                              | -6.37 | 0.08 | 0.00 |
| A_51_P175699 | NM_026443 | 1700020C1 | 67900  | RIKEN cDNA 1700020C11 gene                                                     | -7.24 | 0.08 | 0.00 |
| A_51_P123745 | BC025823  | Spns2     | 216892 | spinster homolog 2 (Drosophila)                                                | -6.55 | 0.08 | 0.00 |
| A_51_P228792 | NM_146030 | Plekhh3   | 217198 | pleckstrin homology domain containing, family H (with MyTH4 domain) member 3   | -7.70 | 0.08 | 0.00 |
| A_51_P318618 | NM_028085 | Anks4b    | 72074  | ankyrin repeat and sterile alpha motif domain containing 4B                    | -6.60 | 0.08 | 0.00 |
| A_51_P329949 | NM_153574 | Fam13a    | 58909  | family with sequence similarity 13, member A                                   | -5.35 | 0.08 | 0.00 |
| A_51_P481958 | NM_016674 | Cldn1     | 12737  | claudin 1                                                                      | -7.44 | 0.08 | 0.00 |
| A_51_P267354 | NM_175478 | Lfn3      | 233067 | leucine rich repeat and fibronectin type III domain containing 3               | -7.59 | 0.08 | 0.00 |
| A_52_P297765 | XM_134539 | NA        | NA     | NA                                                                             | -6.88 | 0.08 | 0.00 |
| A_51_P514300 | NM_009447 | Tuba4a    | 22145  | tubulin, alpha 4A                                                              | -7.83 | 0.07 | 0.00 |
| A_52_P515769 | NM_017378 | Pcdh12    | 53601  | protocadherin 12                                                               | -8.64 | 0.07 | 0.00 |
| A_51_P206824 | NM_027126 | Hfe2      | 69585  | hemochromatosis type 2 (juvenile) (human homolog)                              | -9.32 | 0.07 | 0.00 |
| A_51_P355943 | NM_138656 | Mvd       | 192156 | mevalonate (diphospho) decarboxylase                                           | -5.67 | 0.06 | 0.00 |
| A_52_P631591 | BC024265  | Mast3     | 546071 | microtubule associated serine/threonine kinase 3                               | -6.85 | 0.06 | 0.00 |
| A_51_P256066 | NM_011878 | Tiam2     | 24001  | T-cell lymphoma invasion and metastasis 2                                      | -2.27 | 0.06 | 0.01 |
| A_51_P117865 | NM_030565 | Fam20c    | 80752  | family with sequence similarity 20, member C                                   | -8.91 | 0.06 | 0.00 |
| A_52_P619911 | AK041604  | Dact2     | 240025 | dapper homolog 2, antagonist of beta-catenin (xenopus)                         | -6.85 | 0.06 | 0.00 |
| A_52_P67637  | AK080673  | Sc5d      | 235293 | sterol-C5-desaturase (fungal ERG3, delta-5-desaturase) homolog (S. cerevisiae) | -8.55 | 0.05 | 0.00 |
| A_51_P327874 | NM_011199 | Pth1r     | 19228  | parathyroid hormone 1 receptor                                                 | -9.30 | 0.05 | 0.00 |
| A_51_P277336 | NM_138741 | Sdpr      | 20324  | serum deprivation response                                                     | -6.17 | 0.05 | 0.00 |

|              |           |         |        |                                                                                  |       |      |      |
|--------------|-----------|---------|--------|----------------------------------------------------------------------------------|-------|------|------|
| A_51_P250807 | NM_030176 | Spata2L | 78779  | spermatogenesis associated 2-like                                                | -7.30 | 0.05 | 0.00 |
| A_52_P164136 | NM_001042 | Arrdc3  | 105171 | arrestin domain containing 3                                                     | -8.00 | 0.04 | 0.00 |
| A_51_P440743 | NM_009886 | Celsr1  | 12614  | cadherin, EGF LAG seven-pass G-type receptor 1<br>(flamingo homolog, Drosophila) | -9.19 | 0.04 | 0.00 |
| A_52_P639461 | AK075630  | Car3    | 12350  | carbonic anhydrase 3                                                             | -7.08 | 0.04 | 0.00 |
| A_52_P681391 | NM_008059 | G0s2    | 14373  | G0/G1 switch gene 2                                                              | -7.31 | 0.03 | 0.00 |
| A_51_P462385 | NM_008061 | G6pc    | 14377  | glucose-6-phosphatase, catalytic                                                 | -6.74 | 0.03 | 0.00 |
| A_52_P84027  | NM_007824 | Cyp7a1  | 13122  | cytochrome P450, family 7, subfamily a, polypeptide 1                            | -7.52 | 0.01 | 0.00 |

**(b) B6;129(E2F1-/-) mice 6 hours post-LPS**

| PROBE        | ACCESSION | SYMBOL   | ENTREZID | DESCRIPTION                                                                | Score (d) | LPS/saline |             |
|--------------|-----------|----------|----------|----------------------------------------------------------------------------|-----------|------------|-------------|
|              |           |          |          |                                                                            |           | fold       | q-value (%) |
| A_52_P630493 | NM_001037 | Dnajb6   | 23950    | Dnaj (Hsp40) homolog, subfamily B, member 6                                | 7.39      | 1.60       | 0.00        |
| A_51_P296158 | NM_001002 | AI413582 | 106672   | expressed sequence AI413582                                                | -5.28     | 0.81       | 0.00        |
| A_51_P508775 | NM_011846 | Mmp17    | 23948    | matrix metalloproteinase 17                                                | -4.84     | 0.77       | 0.00        |
| A_52_P619262 | AK122497  | Mical3   | 194401   | microtubule associated monooxygenase, calponin and LIM domain containing 3 | -4.62     | 0.76       | 0.00        |
| A_52_P49712  | NM_010435 | Hira     | 15260    | histone cell cycle regulation defective homolog A (S. cerevisiae)          | -5.46     | 0.76       | 0.00        |
| A_52_P519689 | NM_011306 | Rxrb     | 20182    | retinoid X receptor beta                                                   | -5.12     | 0.73       | 0.00        |
| A_52_P362670 | NM_009614 | Adam15   | 11490    | a disintegrin and metalloproteinase domain 15 (metargidin)                 | -4.66     | 0.72       | 0.00        |
| A_52_P756306 | NA        | NA       | NA       | NA                                                                         | -4.98     | 0.71       | 0.00        |
| A_52_P146918 | NM_011814 | Fxr2     | 23879    | fragile X mental retardation, autosomal homolog 2                          | -4.90     | 0.69       | 0.00        |
| A_52_P851407 | AK033152  | NA       | NA       | NA                                                                         | -4.79     | 0.69       | 0.00        |
| A_51_P478326 | NM_026270 | Akt1s1   | 67605    | AKT1 substrate 1 (proline-rich)                                            | -4.75     | 0.67       | 0.00        |
| A_51_P468464 | NM_201352 | Gdpd5    | 233552   | glycerophosphodiester phosphodiesterase domain containing 5                | -4.69     | 0.67       | 0.00        |
| A_51_P265151 | NM_172751 | Arhgef10 | 234094   | Rho guanine nucleotide exchange factor (GEF) 10                            | -4.94     | 0.62       | 0.00        |
| A_51_P293059 | NM_133722 | Fam108c  | 70178    | family with sequence similarity 108, member C                              | -5.63     | 0.61       | 0.00        |
| A_51_P364432 | NM_024256 | B3gat3   | 72727    | beta-1,3-glucuronyltransferase 3 (glucuronosyltransferase I)               | -4.64     | 0.57       | 0.00        |

|              |           |        |        |                                               |       |      |      |
|--------------|-----------|--------|--------|-----------------------------------------------|-------|------|------|
| A_52_P392121 | NM_028763 | Cbx6   | 494448 | chromobox homolog 6                           | -4.73 | 0.48 | 0.00 |
| A_51_P393226 | X52641    | H2-Eb1 | 14969  | histocompatibility 2, class II antigen E beta | -5.60 | 0.36 | 0.00 |
| A_52_P362106 | AK005018  | NA     | NA     | NA                                            | -4.75 | 0.33 | 0.00 |

**(C)** B6129 F2 mice 20 hours post-LPS

| PROBE        | ACCESSION | SYMBOL    | ENTREZID | DESCRIPTION                                                                | LPS/saline |        |             |
|--------------|-----------|-----------|----------|----------------------------------------------------------------------------|------------|--------|-------------|
|              |           |           |          |                                                                            | Score (d)  | Fold   | q-value (%) |
| A_51_P169671 | NM_011036 | Reg3b     | 18489    | regenerating islet-derived 3 beta                                          | 10.82      | 235.54 | 0.00        |
| A_51_P354126 | NM_011260 | Reg3g     | 19695    | regenerating islet-derived 3 gamma                                         | 11.87      | 189.82 | 0.00        |
| A_52_P525348 | NA        | NA        | NA       | NA                                                                         | 10.72      | 112.32 | 0.00        |
| A_51_P510156 | NM_008491 | Lcn2      | 16819    | lipocalin 2                                                                | 8.45       | 90.72  | 0.00        |
| A_51_P490456 | NM_178373 | Cidec     | 14311    | cell death-inducing DFFA-like effector c                                   | 11.19      | 85.88  | 0.00        |
| A_51_P493649 | NM_023135 | Sult1e1   | 20860    | sulfotransferase family 1E, member 1                                       | 11.89      | 82.45  | 0.00        |
| A_51_P172853 | NM_009841 | Cd14      | 12475    | CD14 antigen                                                               | 8.62       | 69.42  | 0.00        |
| A_51_P183571 | NM_008871 | Serpine1  | 18787    | serine (or cysteine) peptidase inhibitor, clade E, member 1                | 8.61       | 67.09  | 0.00        |
| A_52_P455370 | NM_175628 | A2m       | 232345   | alpha-2-macroglobulin                                                      | 4.54       | 66.11  | 0.00        |
| A_51_P461665 | NM_008599 | Cxcl9     | 17329    | chemokine (C-X-C motif) ligand 9                                           | 9.38       | 56.73  | 0.00        |
| A_52_P188042 | NM_198297 | Trat1     | 77647    | T cell receptor associated transmembrane adaptor 1                         | 12.83      | 53.07  | 0.00        |
| A_52_P286511 | NM_021352 | Crybb3    | 12962    | crystallin, beta B3                                                        | 11.22      | 51.13  | 0.00        |
| A_51_P434737 | NM_001040 | NA        | NA       | NA                                                                         | 3.27       | 49.78  | 0.01        |
| A_52_P472324 | NM_011414 | Slpi      | 20568    | secretory leukocyte peptidase inhibitor                                    | 9.21       | 49.04  | 0.00        |
| A_52_P338066 | NM_023137 | Ubd       | 24108    | ubiquitin D                                                                | 7.78       | 48.60  | 0.00        |
| A_51_P203955 | NM_010260 | Gbp2      | 14469    | guanylate binding protein 2                                                | 6.52       | 45.90  | 0.00        |
| A_52_P419678 | NM_001033 | Serpina3f | 238393   | serine (or cysteine) peptidase inhibitor, clade A, member 3F               | 5.59       | 45.66  | 0.00        |
| A_51_P112966 | NM_009890 | Ch25h     | 12642    | cholesterol 25-hydroxylase                                                 | 8.76       | 44.68  | 0.00        |
| A_51_P279606 | NM_009896 | Socs1     | 12703    | suppressor of cytokine signaling 1                                         | 5.25       | 39.98  | 0.00        |
| A_52_P419679 | NM_001033 | Serpina3f | 238393   | serine (or cysteine) peptidase inhibitor, clade A, member 3F               | 5.39       | 39.34  | 0.00        |
| A_51_P173678 | NM_029415 | Slc10a6   | 75750    | solute carrier family 10 (sodium/bile acid cotransporter family), member 6 | 7.30       | 38.88  | 0.00        |
| A_51_P408703 | NM_028842 | NA        | NA       | NA                                                                         | 8.46       | 38.31  | 0.00        |

|              |           |           |        |                                                          |       |       |      |
|--------------|-----------|-----------|--------|----------------------------------------------------------|-------|-------|------|
| A_52_P431159 | NM_001039 | Il1rn     | 16181  | interleukin 1 receptor antagonist                        | 6.65  | 37.33 | 0.00 |
| A_52_P638459 | BC033508  | Ccl5      | 20304  | chemokine (C-C motif) ligand 5                           | 11.04 | 36.04 | 0.00 |
| A_51_P286488 | NM_133662 | ler3      | 15937  | immediate early response 3                               | 8.34  | 35.89 | 0.00 |
| A_51_P286737 | NM_011333 | Ccl2      | 20296  | chemokine (C-C motif) ligand 2                           | 5.96  | 33.94 | 0.00 |
| A_52_P675857 | NA        | NA        | NA     | NA                                                       | 8.83  | 33.68 | 0.00 |
| A_51_P249989 | NM_145133 | Tifa      | 211550 | TRAF-interacting protein with forkhead-associated domain | 7.01  | 33.33 | 0.00 |
| A_51_P350453 | NM_013743 | Pdk4      | 27273  | pyruvate dehydrogenase kinase, isoenzyme 4               | 10.25 | 31.82 | 0.00 |
| A_51_P482908 | NM_025549 | Arrdc4    | 66412  | arrestin domain containing 4                             | 7.64  | 31.79 | 0.00 |
| A_51_P485312 | NM_013653 | Ccl5      | 20304  | chemokine (C-C motif) ligand 5                           | 11.00 | 31.27 | 0.00 |
| A_51_P398766 | NM_010259 | Gbp1      | 14468  | guanylate binding protein 1                              | 2.97  | 29.97 | 0.03 |
| A_51_P488196 | NM_028472 | Bmper     | 73230  | BMP-binding endothelial regulator                        | 13.17 | 28.13 | 0.00 |
| A_51_P402943 | NM_009114 | S100a9    | 20202  | S100 calcium binding protein A9 (calgranulin B)          | 9.29  | 27.81 | 0.00 |
| A_51_P123625 | AK152177  | Irg1      | 16365  | immunoresponsive gene 1                                  | 8.80  | 27.77 | 0.00 |
| A_51_P167292 | NM_009892 | Chi3l3    | 12655  | chitinase 3-like 3                                       | 9.41  | 27.07 | 0.00 |
| A_51_P367263 | NM_199222 | Lman1l    | 235416 | lectin, mannose-binding 1 like                           | 11.66 | 24.43 | 0.00 |
| A_51_P228753 | XM_897631 | NA        | NA     | NA                                                       | 7.89  | 23.75 | 0.00 |
| A_51_P363947 | NM_007669 | Cdkn1a    | 12575  | cyclin-dependent kinase inhibitor 1A (P21)               | 9.77  | 23.73 | 0.00 |
| A_51_P123630 | L38281    | Irg1      | 16365  | immunoresponsive gene 1                                  | 7.89  | 23.16 | 0.00 |
| A_51_P165244 | NM_018734 | Gbp3      | 55932  | guanylate binding protein 3                              | 6.11  | 23.14 | 0.00 |
| A_51_P384831 | NM_134164 | Syt12     | 171180 | synaptotagmin XII                                        | 10.10 | 22.63 | 0.00 |
| A_51_P131408 | NM_013749 | Tnfrsf12a | 27279  | tumor necrosis factor receptor superfamily, member 12a   | 11.35 | 22.31 | 0.00 |
| A_51_P294979 | NM_013602 | Mt1       | 17748  | metallothionein 1                                        | 6.28  | 21.70 | 0.00 |
| A_51_P271503 | NM_008362 | Il1r1     | 16177  | interleukin 1 receptor, type I                           | 10.18 | 21.37 | 0.00 |
| A_51_P340601 | NM_009770 | Btg3      | 12228  | B-cell translocation gene 3                              | 7.79  | 21.22 | 0.00 |
| A_51_P495780 | NM_020568 | Plin4     | 57435  | perilipin 4                                              | 11.90 | 21.07 | 0.00 |
| A_52_P474528 | NA        | NA        | NA     | NA                                                       | 8.41  | 21.02 | 0.00 |
| A_52_P49797  | NA        | NA        | NA     | NA                                                       | 8.44  | 20.95 | 0.00 |
| A_52_P480044 | NA        | NA        | NA     | NA                                                       | 3.81  | 20.83 | 0.00 |
| A_52_P615051 | AK035396  | 1200016E2 | 319202 | RIKEN cDNA 1200016E24 gene                               | 8.30  | 20.81 | 0.00 |
| A_52_P681310 | NM_011113 | Plaur     | 18793  | plasminogen activator, urokinase receptor                | 7.70  | 19.75 | 0.00 |
| A_51_P422257 | NM_010131 | Emx1      | 13796  | empty spiracles homolog 1 (Drosophila)                   | 7.36  | 19.47 | 0.00 |
| A_51_P432641 | NM_021274 | Cxcl10    | 15945  | chemokine (C-X-C motif) ligand 10                        | 3.71  | 19.29 | 0.01 |

|              |           |           |        |                                                 |       |       |      |
|--------------|-----------|-----------|--------|-------------------------------------------------|-------|-------|------|
| A_51_P216550 | NM_011641 | Trp63     | 22061  | transformation related protein 63               | 5.10  | 19.21 | 0.00 |
| A_51_P378789 | NM_018866 | Cxcl13    | 55985  | chemokine (C-X-C motif) ligand 13               | 4.95  | 18.85 | 0.00 |
| A_51_P159803 | NM_032002 | Nrg4      | 83961  | neuregulin 4                                    | 12.63 | 18.42 | 0.00 |
| A_51_P501248 | NM_025367 | Sphk1     | 20698  | sphingosine kinase 1                            | 6.63  | 18.40 | 0.00 |
| A_52_P427640 | XR_002113 | EG667984  | 667984 | predicted gene, EG667984                        | 8.31  | 18.38 | 0.00 |
| A_51_P463562 | NM_008620 | Gbp4      | 17472  | guanylate binding protein 4                     | 7.71  | 18.37 | 0.00 |
| A_52_P676510 | NM_011579 | Tgtp      | 21822  | T-cell specific GTPase                          | 4.36  | 18.27 | 0.00 |
| A_52_P103628 | NA        | NA        | NA     | NA                                              | 11.32 | 17.95 | 0.00 |
| A_51_P122321 | NM_133775 | Il33      | 77125  | interleukin 33                                  | 4.60  | 17.94 | 0.00 |
| A_51_P256827 | NM_013650 | S100a8    | 20201  | S100 calcium binding protein A8 (calgranulin A) | 9.58  | 17.79 | 0.00 |
| A_52_P429450 | NM_008694 | Ngp       | 18054  | neutrophilic granule protein                    | 12.78 | 17.78 | 0.00 |
| A_52_P423810 | AK154954  | Mt1       | 17748  | metallothionein 1                               | 6.31  | 17.76 | 0.00 |
| A_51_P155643 | NM_016740 | S100a11   | 20195  | S100 calcium binding protein A11 (calgizzarin)  | 14.39 | 17.59 | 0.00 |
| A_51_P362066 | NM_007695 | Chi3l1    | 12654  | chitinase 3-like 1                              | 7.66  | 17.54 | 0.00 |
| A_52_P319361 | NM_029494 | Rab30     | 75985  | RAB30, member RAS oncogene family               | 7.93  | 17.41 | 0.00 |
| A_52_P412417 | NM_009397 | Tnfaip3   | 21929  | tumor necrosis factor, alpha-induced protein 3  | 6.74  | 17.31 | 0.00 |
| A_51_P317176 | NM_009971 | Csf3      | 12985  | colony stimulating factor 3 (granulocyte)       | 3.63  | 17.19 | 0.01 |
| A_51_P342567 | NM_031185 | Akap12    | 83397  | A kinase (PRKA) anchor protein (gravin) 12      | 7.54  | 17.18 | 0.00 |
| A_51_P126437 | NM_007930 | Enc1      | 13803  | ectodermal-neural cortex 1                      | 9.59  | 17.06 | 0.00 |
| A_52_P260145 | XM_978721 | NA        | NA     | NA                                              | 14.38 | 16.90 | 0.00 |
| A_52_P386627 | NM_028679 | Irak3     | 73914  | interleukin-1 receptor-associated kinase 3      | 8.51  | 16.47 | 0.00 |
| A_52_P201245 | NM_133902 | Sdsl      | 257635 | serine dehydratase-like                         | 13.37 | 16.32 | 0.00 |
| A_52_P6328   | NM_021524 | Nampt     | 59027  | nicotinamide phosphoribosyltransferase          | 7.30  | 16.09 | 0.00 |
| A_51_P336833 | NM_024406 | Fabp4     | 11770  | fatty acid binding protein 4, adipocyte         | 9.51  | 15.77 | 0.00 |
| A_51_P248666 | NM_021893 | Cd274     | 60533  | CD274 antigen                                   | 5.12  | 15.61 | 0.00 |
| A_51_P421876 | NM_016850 | Irf7      | 54123  | interferon regulatory factor 7                  | 12.22 | 15.54 | 0.00 |
| A_52_P344949 | NM_172777 | Gbp9      | 236573 | guanylate-binding protein 9                     | 5.53  | 15.46 | 0.00 |
| A_51_P352594 | NM_001001 | St5       | 76954  | suppression of tumorigenicity 5                 | 5.87  | 15.40 | 0.00 |
| A_52_P572808 | NM_172715 | Agpat9    | 231510 | 1-acylglycerol-3-phosphate O-acyltransferase 9  | 3.57  | 15.39 | 0.01 |
| A_52_P182919 | NM_054098 | Steap4    | 117167 | STEAP family member 4                           | 5.24  | 15.15 | 0.00 |
| A_52_P399934 | NM_010090 | Dusp2     | 13537  | dual specificity phosphatase 2                  | 9.45  | 15.00 | 0.00 |
| A_51_P325904 | NM_008381 | Inhbb     | 16324  | inhibin beta-B                                  | 8.58  | 14.92 | 0.00 |
| A_52_P416756 | NM_033075 | D17H6S56E | 110956 | DNA segment, Chr 17, human D6S56E 5             | 7.07  | 14.91 | 0.00 |
| A_51_P184936 | NM_021394 | Zbp1      | 58203  | Z-DNA binding protein 1                         | 7.26  | 14.90 | 0.00 |

|               |           |            |         |                                                                                               |       |       |      |
|---------------|-----------|------------|---------|-----------------------------------------------------------------------------------------------|-------|-------|------|
| A_52_P247900  | U42467    | Lepr       | 16847   | leptin receptor                                                                               | 12.58 | 14.89 | 0.00 |
| A_52_P2710    | NM_023493 | Cml5       | 69049   | camello-like 5                                                                                | 6.97  | 14.88 | 0.00 |
| A_51_P143893  | NM_054098 | Steap4     | 117167  | STEAP family member 4                                                                         | 5.94  | 14.82 | 0.00 |
| A_51_P212491  | NM_133232 | Pfkfb3     | 170768  | 6-phosphofructo-2-kinase/fructose-2,6-biphosphatase 3                                         | 5.94  | 14.73 | 0.00 |
| A_51_P337308  | NM_011315 | Saa3       | 20210   | serum amyloid A 3                                                                             | 6.00  | 14.67 | 0.00 |
| A_51_P470079  | NM_010555 | Il1r2      | 16178   | interleukin 1 receptor, type II                                                               | 12.47 | 14.62 | 0.00 |
| A_52_P437421  | NM_028472 | Bmper      | 73230   | BMP-binding endothelial regulator                                                             | 10.47 | 14.34 | 0.00 |
| A_51_P180747  | NM_007796 | Ctla2a     | 13024   | cytotoxic T lymphocyte-associated protein 2 alpha                                             | 11.64 | 14.32 | 0.00 |
| A_51_P134468  | NM_033075 | D17H6S56E1 | 110956  | DNA segment, Chr 17, human D6S56E 5                                                           | 5.45  | 14.24 | 0.00 |
| A_51_P315904  | NM_011817 | Gadd45g    | 23882   | growth arrest and DNA-damage-inducible 45 gamma                                               | 6.42  | 13.99 | 0.00 |
| A_51_P363187  | NM_008176 | Cxcl1      | 14825   | chemokine (C-X-C motif) ligand 1                                                              | 4.73  | 13.96 | 0.00 |
| A_52_P432170  | AK021294  | 2810416G2  | 1E+08   | RIKEN cDNA 2810416G20 gene                                                                    | 10.52 | 13.78 | 0.00 |
| A_51_P412817  | AK029791  | Dnahc2     | 327954  | dynein, axonemal, heavy chain 2                                                               | 9.40  | 13.70 | 0.00 |
| A_51_P387235  | NM_021524 | Nampt      | 59027   | nicotinamide phosphoribosyltransferase                                                        | 7.32  | 13.63 | 0.00 |
| A_51_P336830  | NM_024406 | Fabp4      | 11770   | fatty acid binding protein 4, adipocyte                                                       | 10.15 | 13.49 | 0.00 |
| A_51_P476767  | NM_010924 | Nnmt       | 18113   | nicotinamide N-methyltransferase                                                              | 6.44  | 13.22 | 0.00 |
| A_52_P1196729 | AK086288  | NA         | NA      | NA                                                                                            | 8.29  | 13.17 | 0.00 |
| A_52_P222775  | NM_016693 | Map3k6     | 53608   | mitogen-activated protein kinase kinase kinase 6                                              | 7.17  | 13.11 | 0.00 |
| A_51_P254656  | NM_008230 | Hdc        | 15186   | histidine decarboxylase                                                                       | 12.21 | 13.05 | 0.00 |
| A_51_P233797  | NM_009626 | Adh7       | 11529   | alcohol dehydrogenase 7 (class IV), mu or sigma polypeptide                                   | 8.34  | 13.04 | 0.00 |
| A_51_P317427  | NM_177420 | Psat1      | 107272  | phosphoserine aminotransferase 1                                                              | 7.98  | 12.98 | 0.00 |
| A_51_P246317  | NM_008630 | Mt2        | 17750   | metallothionein 2                                                                             | 5.29  | 12.94 | 0.00 |
| A_51_P480290  | AK010559  | Casz1      | 69743   | castor homolog 1, zinc finger (Drosophila)                                                    | 6.30  | 12.75 | 0.00 |
| A_51_P170807  | NM_016693 | Map3k6     | 53608   | mitogen-activated protein kinase kinase kinase 6                                              | 7.46  | 12.66 | 0.00 |
| A_52_P189772  | NM_194336 | Mpa2l      | 100702  | macrophage activation 2 like                                                                  | 5.26  | 12.54 | 0.00 |
| A_51_P514961  | NM_178892 | Tiparp     | 99929   | TCDD-inducible poly(ADP-ribose) polymerase serine (or cysteine) peptidase inhibitor, clade A, | 4.47  | 12.53 | 0.00 |
| A_51_P159453  | NM_009252 | Serpina3n  | 20716   | member 3N                                                                                     | 10.00 | 12.52 | 0.00 |
| A_52_P301935  | NM_001033 | Il20rb     | 213208  | interleukin 20 receptor beta                                                                  | 4.75  | 12.46 | 0.00 |
| A_52_P141608  | NM_183160 | E030010A1  | 1226040 | RIKEN cDNA E030010A14 gene                                                                    | 5.54  | 12.43 | 0.00 |

|              |           |           |        |                                                                                                        |       |       |      |
|--------------|-----------|-----------|--------|--------------------------------------------------------------------------------------------------------|-------|-------|------|
| A_52_P174942 | AK040447  | Nrp1      | 18186  | neuropilin 1                                                                                           | 4.07  | 12.35 | 0.00 |
| A_51_P489522 | AK150917  | Ctla2b    | 13025  | cytotoxic T lymphocyte-associated protein 2 beta                                                       | 13.54 | 12.22 | 0.00 |
| A_51_P295315 | NM_020033 | Ankrd2    | 56642  | ankyrin repeat domain 2 (stretch responsive muscle)                                                    | 3.50  | 12.02 | 0.01 |
| A_51_P436652 | NM_013654 | Ccl7      | 20306  | chemokine (C-C motif) ligand 7                                                                         | 5.65  | 11.88 | 0.00 |
| A_52_P383653 | NM_001033 | Cpne8     | 66871  | copine VIII                                                                                            | 10.44 | 11.67 | 0.00 |
| A_52_P327664 | NM_153564 | Gbp5      | 229898 | guanylate binding protein 5                                                                            | 4.43  | 11.65 | 0.00 |
| A_51_P311958 | NM_013623 | Orm3      | 18407  | orosomuroid 3                                                                                          | 7.97  | 11.50 | 0.00 |
| A_51_P323180 | NM_172777 | Gbp9      | 236573 | guanylate-binding protein 9                                                                            | 5.91  | 11.43 | 0.00 |
| A_52_P605319 | NM_199148 | BC051665  | 218275 | cDNA sequence BC051665                                                                                 | 9.67  | 11.36 | 0.00 |
| A_51_P288138 | NM_008039 | Fpr2      | 14289  | formyl peptide receptor 2                                                                              | 10.55 | 11.30 | 0.00 |
| A_51_P474459 | NM_007707 | Socs3     | 12702  | suppressor of cytokine signaling 3                                                                     | 6.75  | 11.13 | 0.00 |
| A_52_P463936 | NM_015783 | Isg15     | 1E+08  | ISG15 ubiquitin-like modifier                                                                          | 4.28  | 11.10 | 0.00 |
| A_52_P496726 | NM_009026 | Rasd1     | 19416  | RAS, dexamethasone-induced 1                                                                           | 10.09 | 11.07 | 0.00 |
| A_52_P661713 | NM_029000 | Gvin1     | 74558  | GTPase, very large interferon inducible 1                                                              | 5.37  | 11.03 | 0.00 |
| A_52_P50529  | BC116253  | Nlrp12    | 378425 | NLR family, pyrin domain containing 12                                                                 | 8.67  | 10.99 | 0.00 |
| A_52_P362917 | NM_133232 | Pfkfb3    | 170768 | 6-phosphofructo-2-kinase/fructose-2,6-biphosphatase 3                                                  | 3.18  | 10.97 | 0.02 |
| A_52_P87843  | NM_053080 | Aldh1a3   | 56847  | aldehyde dehydrogenase family 1, subfamily A3                                                          | 4.38  | 10.95 | 0.00 |
| A_51_P208152 | AK014460  | 3930402G2 | 665306 | RIKEN cDNA 3930402G23 gene                                                                             | 11.90 | 10.88 | 0.00 |
| A_52_P295432 | NM_009141 | Cxcl5     | 20311  | chemokine (C-X-C motif) ligand 5                                                                       | 4.09  | 10.88 | 0.00 |
| A_52_P259268 | XM_982175 | Gm7969    | 666185 | predicted gene 7969                                                                                    | 5.83  | 10.85 | 0.00 |
| A_51_P112405 | NM_011113 | Plaur     | 18793  | plasminogen activator, urokinase receptor serine (or cysteine) peptidase inhibitor, clade A, member 3G | 6.03  | 10.81 | 0.00 |
| A_51_P326191 | NM_009251 | Serpina3g | 20715  | member 3G                                                                                              | 8.81  | 10.80 | 0.00 |
| A_51_P297925 | NM_153159 | Zc3h12a   | 230738 | zinc finger CCCH type containing 12A                                                                   | 4.52  | 10.79 | 0.00 |
| A_51_P408506 | BC008626  | Icam1     | 15894  | intercellular adhesion molecule 1                                                                      | 5.67  | 10.75 | 0.00 |
| A_52_P321150 | NM_023516 | 2310016C0 | 69573  | RIKEN cDNA 2310016C08 gene                                                                             | 6.20  | 10.74 | 0.00 |
| A_52_P31543  | NM_007570 | Btg2      | 12227  | B-cell translocation gene 2, anti-proliferative transformation related protein 53 inducible nuclear    | 5.96  | 10.74 | 0.00 |
| A_51_P175580 | NM_021897 | Trp53inp1 | 60599  | protein 1                                                                                              | 2.99  | 10.72 | 0.03 |
| A_51_P511810 | NM_001042 | Cd63      | 12512  | CD63 antigen                                                                                           | 10.13 | 10.65 | 0.00 |
| A_52_P658122 | NM_011809 | Ets2      | 23872  | E26 avian leukemia oncogene 2, 3' domain                                                               | 5.41  | 10.56 | 0.00 |



|              |           |                 |        |                                                           |       |       |      |
|--------------|-----------|-----------------|--------|-----------------------------------------------------------|-------|-------|------|
|              |           |                 |        | nuclear factor of kappa light polypeptide gene enhancer   |       |       |      |
| A_51_P387591 | NM_030612 | Nfkbiz          | 80859  | in B-cells inhibitor, zeta                                | 6.65  | 10.55 | 0.00 |
| A_51_P494403 | AK046736  | Xaf1            | 327959 | XIAP associated factor 1                                  | 2.73  | 10.48 | 0.07 |
| A_51_P439085 | NM_023516 | 2310016C069573  |        | RIKEN cDNA 2310016C08 gene                                | 6.48  | 10.34 | 0.00 |
| A_52_P251690 | NM_029000 | Gvin1           | 74558  | GTPase, very large interferon inducible 1                 | 4.97  | 10.30 | 0.00 |
| A_51_P111612 | NM_001042 | Arrdc4          | 66412  | arrestin domain containing 4                              | 3.25  | 10.24 | 0.01 |
| A_51_P327405 | NM_029509 | Gbp8            | 76074  | guanylate-binding protein 8                               | 4.21  | 10.21 | 0.00 |
| A_51_P116601 | NM_172447 | A330021E2207686 |        | RIKEN cDNA A330021E22 gene                                | 7.41  | 10.17 | 0.00 |
| A_51_P512384 | NM_001044 | Timp1           | 21857  | tissue inhibitor of metalloproteinase 1                   | 10.34 | 10.13 | 0.00 |
| A_52_P288270 | XR_003114 | NA              | NA     | NA                                                        | 12.72 | 10.05 | 0.00 |
| A_51_P262340 | BC106176  | Rbm3            | 19652  | RNA binding motif protein 3                               | 16.57 | 10.03 | 0.00 |
| A_51_P197209 | NM_133770 | Adck4           | 76889  | aarF domain containing kinase 4                           | 9.30  | 9.96  | 0.00 |
| A_51_P407028 | NM_007607 | Car4            | 12351  | carbonic anhydrase 4                                      | 10.72 | 9.96  | 0.00 |
| A_52_P161488 | NM_019948 | Clec4e          | 56619  | C-type lectin domain family 4, member e                   | 8.48  | 9.95  | 0.00 |
| A_52_P350512 | NM_145996 | Arid5a          | 214855 | AT rich interactive domain 5A (MRF1-like)                 | 4.59  | 9.85  | 0.00 |
| A_51_P238722 | NM_010740 | Cd93            | 17064  | CD93 antigen                                              | 12.64 | 9.83  | 0.00 |
| A_51_P307166 | NM_001039 | Il1rn           | 16181  | interleukin 1 receptor antagonist                         | 5.90  | 9.82  | 0.00 |
|              |           |                 |        | cell death-inducing DNA fragmentation factor, alpha       |       |       |      |
| A_51_P199168 | NM_007702 | Cidea           | 12683  | subunit-like effector A                                   | 6.23  | 9.82  | 0.00 |
| A_52_P466090 | NM_018851 | Samhd1          | 56045  | SAM domain and HD domain, 1                               | 4.33  | 9.79  | 0.00 |
| A_52_P422494 | NM_145634 | Cd300lf         | 246746 | CD300 antigen like family member F                        | 9.33  | 9.77  | 0.00 |
| A_51_P371750 | NM_010766 | Marco           | 17167  | macrophage receptor with collagenous structure            | 5.73  | 9.71  | 0.00 |
| A_51_P444447 | NM_007679 | Cebpd           | 12609  | CCAAT/enhancer binding protein (C/EBP), delta             | 7.98  | 9.64  | 0.00 |
| A_52_P603038 | NM_016968 | Olig1           | 50914  | oligodendrocyte transcription factor 1                    | 4.16  | 9.62  | 0.00 |
| A_51_P396045 | NM_010704 | Lepr            | 16847  | leptin receptor                                           | 9.94  | 9.60  | 0.00 |
|              |           |                 |        | potassium inwardly-rectifying channel, subfamily J,       |       |       |      |
| A_51_P312795 | NM_008428 | Kcnj8           | 16523  | member 8                                                  | 9.69  | 9.58  | 0.00 |
| A_52_P522157 | BC032970  | 2810026P172655  |        | RIKEN cDNA 2810026P18 gene                                | 3.76  | 9.54  | 0.00 |
| A_52_P250644 | NA        | NA              | NA     | NA                                                        | 8.07  | 9.40  | 0.00 |
| A_51_P182796 | NM_009373 | Tgm2            | 21817  | transglutaminase 2, C polypeptide                         | 8.41  | 9.39  | 0.00 |
|              |           |                 |        | solute carrier family 7 (cationic amino acid transporter, |       |       |      |
| A_52_P462071 | NM_178798 | Slc7a6          | 330836 | y+ system), member 6                                      | 5.19  | 9.31  | 0.00 |
|              |           |                 |        |                                                           |       |       |      |
| A_51_P320930 | NM_198297 | Trat1           | 77647  | T cell receptor associated transmembrane adaptor 1        | 7.60  | 9.26  | 0.00 |

|               |           |         |        |                                                        |       |      |      |
|---------------|-----------|---------|--------|--------------------------------------------------------|-------|------|------|
| A_51_P229675  | NM_011636 | Plscr1  | 22038  | phospholipid scramblase 1                              | 4.24  | 9.24 | 0.00 |
| A_51_P100063  | NM_010727 | Lnx1    | 16924  | ligand of numb-protein X 1                             | 3.44  | 9.23 | 0.01 |
| A_52_P544421  | NM_029509 | Gbp8    | 76074  | guanylate-binding protein 8                            | 5.32  | 9.09 | 0.00 |
| A_52_P428599  | NM_145126 | Chi3l4  | 104183 | chitinase 3-like 4                                     | 9.76  | 9.05 | 0.00 |
| A_51_P229676  | NM_011636 | Plscr1  | 22038  | phospholipid scramblase 1                              | 3.66  | 9.01 | 0.01 |
| A_51_P187902  | NM_024193 | Nop56   | 67134  | NOP56 ribonucleoprotein homolog (yeast)                | 2.85  | 9.00 | 0.05 |
| A_52_P523835  | AK029360  | Nfe2l2  | 18024  | nuclear factor, erythroid derived 2, like 2            | 4.17  | 8.99 | 0.00 |
| A_51_P166941  | NM_028679 | Irak3   | 73914  | interleukin-1 receptor-associated kinase 3             | 6.42  | 8.97 | 0.00 |
| A_51_P219325  | NM_028038 | Ddx28   | 71986  | DEAD (Asp-Glu-Ala-Asp) box polypeptide 28              | 9.60  | 8.96 | 0.00 |
| A_51_P519251  | NM_019738 | Nupr1   | 56312  | nuclear protein 1                                      | 6.33  | 8.89 | 0.00 |
| A_51_P154842  | NM_145153 | Oas1f   | 243262 | 2'-5' oligoadenylate synthetase 1F                     | 7.87  | 8.86 | 0.00 |
| A_51_P512379  | NA        | NA      | NA     | NA                                                     | 8.90  | 8.81 | 0.00 |
| A_51_P182794  | NM_009373 | Tgm2    | 21817  | transglutaminase 2, C polypeptide                      | 7.79  | 8.75 | 0.00 |
| A_51_P384894  | NM_001033 | Csta    | 209294 | cystatin A                                             | 7.60  | 8.73 | 0.00 |
| A_51_P214423  | BC049153  | Tead1   | 21676  | TEA domain family member 1                             | 4.27  | 8.68 | 0.00 |
| A_51_P484158  | NM_027399 | Steap1  | 70358  | six transmembrane epithelial antigen of the prostate 1 | 6.23  | 8.52 | 0.00 |
| A_52_P400436  | NM_025367 | Sphk1   | 20698  | sphingosine kinase 1                                   | 5.53  | 8.47 | 0.00 |
| A_52_P337357  | NM_145211 | Oas1a   | 246730 | 2'-5' oligoadenylate synthetase 1A                     | 7.71  | 8.36 | 0.00 |
| A_52_P220879  | NM_009373 | Tgm2    | 21817  | transglutaminase 2, C polypeptide                      | 11.42 | 8.35 | 0.00 |
| A_52_P981697  | NM_177712 | Zfp874  | 238692 | zinc finger protein 874                                | 10.93 | 8.31 | 0.00 |
| A_52_P613241  | NM_010493 | Icam1   | 15894  | intercellular adhesion molecule 1                      | 4.62  | 8.29 | 0.00 |
| A_51_P141546  | NM_011016 | Orm2    | 18406  | orosomuroid 2                                          | 9.92  | 8.26 | 0.00 |
| A_52_P57843   | NM_011347 | Selp    | 20344  | selectin, platelet                                     | 6.82  | 8.24 | 0.00 |
| A_51_P501554  | NM_025453 | Tm4sf20 | 66261  | transmembrane 4 L six family member 20                 | 3.08  | 8.18 | 0.02 |
| A_51_P517843  | NM_027450 | Glipr2  | 384009 | GLI pathogenesis-related 2                             | 8.03  | 8.18 | 0.00 |
| A_51_P125745  | NM_012055 | Asns    | 27053  | asparagine synthetase                                  | 5.96  | 8.17 | 0.00 |
| A_52_P535122  | NA        | NA      | NA     | NA                                                     | 7.54  | 8.12 | 0.00 |
| A_51_P211854  | NM_011347 | Selp    | 20344  | selectin, platelet                                     | 7.76  | 8.04 | 0.00 |
| A_51_P461108  | NM_148958 | Osbpl10 | 74486  | oxysterol binding protein-like 10                      | 7.82  | 7.98 | 0.00 |
| A_51_P447545  | NM_008341 | Igfbp1  | 16006  | insulin-like growth factor binding protein 1           | 5.03  | 7.98 | 0.00 |
| A_51_P319460  | NM_011019 | Osmr    | 18414  | oncostatin M receptor                                  | 12.82 | 7.97 | 0.00 |
| A_51_P488739  | NM_030701 | Niacr1  | 80885  | niacin receptor 1                                      | 3.80  | 7.96 | 0.00 |
| A_52_P1013432 | NA        | NA      | NA     | NA                                                     | 11.38 | 7.94 | 0.00 |

|              |           |           |        |                                                                                       |       |      |      |
|--------------|-----------|-----------|--------|---------------------------------------------------------------------------------------|-------|------|------|
| A_51_P491667 | NM_024440 | Der13     | 70377  | Der1-like domain family, member 3                                                     | 4.25  | 7.93 | 0.00 |
| A_52_P46085  | NM_080638 | Mvp       | 78388  | major vault protein                                                                   | 11.75 | 7.93 | 0.00 |
| A_51_P193019 | NM_011157 | Srgn      | 19073  | serglycin                                                                             | 7.25  | 7.70 | 0.00 |
| A_51_P123676 | AK034012  | Synpo     | 104027 | synaptopodin                                                                          | 12.57 | 7.58 | 0.00 |
| A_52_P601446 | AK049314  | Trim27    | 19720  | tripartite motif-containing 27                                                        | 4.32  | 7.57 | 0.00 |
| A_52_P24439  | NM_023134 | Sftpa1    | 20387  | surfactant associated protein A1                                                      | 6.20  | 7.52 | 0.00 |
| A_52_P509421 | XM_001003 | NA        | NA     | NA                                                                                    | 5.53  | 7.52 | 0.00 |
| A_51_P177392 | AB041546  | Tacc2     | 57752  | transforming, acidic coiled-coil containing protein 2                                 | 11.22 | 7.52 | 0.00 |
| A_52_P532982 | NM_011819 | Gdf15     | 23886  | growth differentiation factor 15                                                      | 6.88  | 7.51 | 0.00 |
| A_51_P173709 | NM_022420 | Gprc5b    | 64297  | G protein-coupled receptor, family C, group 5, member B                               | 6.25  | 7.51 | 0.00 |
| A_51_P217463 | NM_009140 | Cxcl2     | 20310  | chemokine (C-X-C motif) ligand 2                                                      | 3.54  | 7.49 | 0.01 |
| A_51_P226269 | NM_025427 | 1190002H2 | 66214  | RIKEN cDNA 1190002H23 gene                                                            | 5.12  | 7.46 | 0.00 |
| A_52_P354682 | NM_029001 | Elov17    | 74559  | ELOVL family member 7, elongation of long chain fatty acids (yeast)                   | 7.23  | 7.42 | 0.00 |
| A_52_P191567 | AK140530  | Plcl1     | 227120 | phospholipase C-like 1                                                                | 7.01  | 7.41 | 0.00 |
| A_52_P452689 | NM_007498 | Atf3      | 11910  | activating transcription factor 3                                                     | 3.20  | 7.40 | 0.02 |
| A_52_P654841 | NM_011636 | Plscr1    | 22038  | phospholipid scramblase 1                                                             | 3.06  | 7.39 | 0.02 |
| A_51_P280455 | AB034730  | Prg4      | 96875  | proteoglycan 4 (megakaryocyte stimulating factor, articular superficial zone protein) | 6.84  | 7.38 | 0.00 |
| A_52_P579580 | NA        | NA        | NA     | NA                                                                                    | 6.67  | 7.37 | 0.00 |
| A_52_P271244 | NM_133692 | Pold3     | 67967  | polymerase (DNA-directed), delta 3, accessory subunit                                 | 4.41  | 7.31 | 0.00 |
| A_52_P646979 | NM_025967 | D16Ertd47 | 67102  | DNA segment, Chr 16, ERATO Doi 472, expressed                                         | 5.28  | 7.30 | 0.00 |
| A_52_P185343 | AK011851  | Gna13     | 14674  | guanine nucleotide binding protein, alpha 13                                          | 6.09  | 7.25 | 0.00 |
| A_51_P176954 | NM_008575 | Mdm4      | 17248  | transformed mouse 3T3 cell double minute 4                                            | 7.74  | 7.23 | 0.00 |
| A_52_P686785 | NM_053247 | Lyve1     | 114332 | lymphatic vessel endothelial hyaluronan receptor 1                                    | 6.73  | 7.22 | 0.00 |
| A_52_P334593 | NM_017466 | Ccr12     | 54199  | chemokine (C-C motif) receptor-like 2                                                 | 3.02  | 7.22 | 0.03 |
| A_51_P444954 | NM_172953 | Serpina5  | 268591 | serine (or cysteine) peptidase inhibitor, clade A, member 5                           | 4.38  | 7.18 | 0.00 |
| A_51_P421958 | NM_144792 | Sgms1     | 208449 | sphingomyelin synthase 1                                                              | 5.69  | 7.16 | 0.00 |
| A_51_P265495 | NM_010738 | Ly6a      | 110454 | lymphocyte antigen 6 complex, locus A                                                 | 6.74  | 7.04 | 0.00 |

|              |           |          |        |                                                                           |       |      |      |
|--------------|-----------|----------|--------|---------------------------------------------------------------------------|-------|------|------|
| A_52_P564544 | NM_024406 | Fabp4    | 11770  | fatty acid binding protein 4, adipocyte                                   | 9.28  | 7.03 | 0.00 |
| A_51_P213544 | NM_010637 | Klf4     | 16600  | Kruppel-like factor 4 (gut)                                               | 5.81  | 6.94 | 0.00 |
| A_51_P341647 | NM_007985 | Fancc    | 14088  | Fanconi anemia, complementation group C                                   | 5.82  | 6.93 | 0.00 |
| A_52_P119814 | NM_001004 | Slc13a5  | 237831 | solute carrier family 13 (sodium-dependent citrate transporter), member 5 | 11.11 | 6.91 | 0.00 |
| A_52_P644273 | NM_028679 | Irak3    | 73914  | interleukin-1 receptor-associated kinase 3                                | 5.29  | 6.91 | 0.00 |
| A_51_P423578 | NM_011408 | Slfn2    | 20556  | schlafen 2                                                                | 8.17  | 6.87 | 0.00 |
| A_51_P314547 | AK019935  | NA       | NA     | NA                                                                        | 6.60  | 6.84 | 0.00 |
| A_52_P256844 | NM_019442 | Stk19    | 54402  | serine/threonine kinase 19                                                | 3.11  | 6.78 | 0.02 |
| A_51_P178692 | NM_007930 | Enc1     | 13803  | ectodermal-neural cortex 1                                                | 3.68  | 6.75 | 0.01 |
| A_51_P336325 | NM_008768 | Orm1     | 18405  | orosomuroid 1                                                             | 4.91  | 6.73 | 0.00 |
| A_51_P267587 | BC052902  | Gdap10   | 14546  | ganglioside-induced differentiation-associated-protein 10                 | 4.14  | 6.67 | 0.00 |
| A_51_P452119 | NM_008498 | Lhx1     | 16869  | LIM homeobox protein 1                                                    | 6.76  | 6.66 | 0.00 |
| A_51_P487791 | NM_007420 | Adrb2    | 11555  | adrenergic receptor, beta 2                                               | 10.34 | 6.65 | 0.00 |
| A_52_P78659  | NM_024288 | Rmnd5a   | 68477  | required for meiotic nuclear division 5 homolog A (S. cerevisiae)         | 4.86  | 6.63 | 0.00 |
| A_52_P297062 | NM_010727 | Ln timer | 16924  | ligand of numb-protein X 1                                                | 3.61  | 6.62 | 0.01 |
| A_51_P282508 | NM_007484 | Rhoc     | 11853  | ras homolog gene family, member C                                         | 9.59  | 6.61 | 0.00 |
| A_52_P577484 | NM_011448 | Sox9     | 20682  | SRY-box containing gene 9                                                 | 8.59  | 6.61 | 0.00 |
| A_51_P120093 | NM_028035 | Snx10    | 71982  | sorting nexin 10                                                          | 7.32  | 6.60 | 0.00 |
| A_51_P379976 | NM_001039 | Arl4a    | 11861  | ADP-ribosylation factor-like 4A                                           | 7.12  | 6.59 | 0.00 |
| A_52_P635388 | AB026047  | Ms4a6d   | 68774  | membrane-spanning 4-domains, subfamily A, member 6D                       | 5.73  | 6.51 | 0.00 |
| A_51_P294555 | NM_001033 | Ifitm6   | 213002 | interferon induced transmembrane protein 6                                | 7.42  | 6.50 | 0.00 |
| A_51_P418375 | NM_023844 | Jam2     | 67374  | junction adhesion molecule 2                                              | 8.84  | 6.46 | 0.00 |
| A_51_P180423 | NM_009921 | Camp     | 12796  | cathelicidin antimicrobial peptide                                        | 10.39 | 6.43 | 0.00 |
| A_51_P511787 | NM_007609 | Casp4    | 12363  | caspase 4, apoptosis-related cysteine peptidase                           | 5.04  | 6.42 | 0.00 |
| A_51_P361448 | NM_028903 | Scara5   | 71145  | scavenger receptor class A, member 5 (putative)                           | 5.95  | 6.40 | 0.00 |
| A_52_P544043 | BC013068  | Pcsk5    | 18552  | proprotein convertase subtilisin/kexin type 5                             | 6.96  | 6.39 | 0.00 |
| A_51_P140710 | NM_011337 | Ccl3     | 20302  | chemokine (C-C motif) ligand 3                                            | 5.22  | 6.39 | 0.00 |
| A_51_P246066 | NM_029612 | Slamf9   | 98365  | SLAM family member 9                                                      | 9.95  | 6.37 | 0.00 |
| A_52_P631307 | AK043577  | Ypel4    | 241525 | yippee-like 4 (Drosophila)                                                | 4.75  | 6.36 | 0.00 |
| A_51_P387608 | NM_010431 | Hif1a    | 15251  | hypoxia inducible factor 1, alpha subunit                                 | 5.99  | 6.36 | 0.00 |

|              |           |           |        |                                                                              |       |      |      |
|--------------|-----------|-----------|--------|------------------------------------------------------------------------------|-------|------|------|
| A_51_P499698 | BC057938  | Asprv1    | 67855  | aspartic peptidase, retroviral-like 1                                        | 8.31  | 6.36 | 0.00 |
| A_52_P273935 | AK020313  | 9230104K2 | 77688  | RIKEN cDNA 9230104K21 gene                                                   | 4.84  | 6.34 | 0.00 |
| A_51_P440568 | NM_019442 | Stk19     | 54402  | serine/threonine kinase 19                                                   | 3.06  | 6.32 | 0.02 |
| A_52_P472302 | NM_022004 | Fxyd6     | 59095  | FXYD domain-containing ion transport regulator 6                             | 4.32  | 6.31 | 0.00 |
| A_52_P371154 | NM_144792 | Sgms1     | 208449 | sphingomyelin synthase 1                                                     | 6.57  | 6.30 | 0.00 |
| A_52_P339726 | NA        | NA        | NA     | NA                                                                           | 5.59  | 6.26 | 0.00 |
| A_51_P155052 | NM_053247 | Lyve1     | 114332 | lymphatic vessel endothelial hyaluronan receptor 1                           | 5.91  | 6.24 | 0.00 |
| A_51_P232682 | NM_017466 | Ccrl2     | 54199  | chemokine (C-C motif) receptor-like 2                                        | 3.78  | 6.24 | 0.00 |
| A_51_P511236 | NM_001077 | Pik3r1    | 18708  | phosphatidylinositol 3-kinase, regulatory subunit, polypeptide 1 (p85 alpha) | 4.94  | 6.20 | 0.00 |
| A_51_P329928 | NM_013750 | Phlda3    | 27280  | pleckstrin homology-like domain, family A, member 3                          | 6.47  | 6.19 | 0.00 |
| A_52_P496935 | NM_030184 | Armc9     | 78795  | armadillo repeat containing 9                                                | 6.32  | 6.18 | 0.00 |
| A_52_P850132 | AK008330  | 2010107C1 | 70256  | RIKEN cDNA 2010107C10 gene                                                   | 3.93  | 6.18 | 0.00 |
| A_51_P291417 | NM_009378 | Thbd      | 21824  | thrombomodulin                                                               | 5.60  | 6.17 | 0.00 |
| A_51_P319917 | NM_007403 | Adam8     | 11501  | a disintegrin and metallopeptidase domain 8                                  | 6.07  | 6.17 | 0.00 |
| A_51_P435023 | NM_019713 | Rassf1    | 56289  | Ras association (RalGDS/AF-6) domain family member 1                         | 9.48  | 6.16 | 0.00 |
| A_51_P229129 | NM_146818 | Olf1r1218 | 258815 | olfactory receptor 1218                                                      | 8.39  | 6.15 | 0.00 |
| A_52_P169901 | NM_001009 | Mcart1    | 230125 | mitochondrial carrier triple repeat 1                                        | 4.95  | 6.15 | 0.00 |
| A_51_P480119 | NM_029942 | Preli2    | 77619  | PRELI domain containing 2                                                    | 3.43  | 6.12 | 0.01 |
| A_52_P533146 | NM_007837 | Ddit3     | 13198  | DNA-damage inducible transcript 3                                            | 9.82  | 6.09 | 0.00 |
| A_51_P122246 | NM_029720 | Creld2    | 76737  | cysteine-rich with EGF-like domains 2                                        | 6.27  | 6.07 | 0.00 |
| A_51_P231320 | NM_008611 | Mmp8      | 17394  | matrix metallopeptidase 8                                                    | 9.45  | 6.06 | 0.00 |
| A_51_P112355 | NM_018738 | Igtp      | 16145  | interferon gamma induced GTPase                                              | 3.55  | 6.05 | 0.01 |
| A_51_P168459 | NM_030694 | Ifitm2    | 80876  | interferon induced transmembrane protein 2                                   | 9.84  | 6.02 | 0.00 |
| A_51_P367060 | NM_013562 | Ifrd1     | 15982  | interferon-related developmental regulator 1                                 | 7.35  | 6.00 | 0.00 |
| A_52_P408580 | NM_001004 | Tacc2     | 57752  | transforming, acidic coiled-coil containing protein 2                        | 11.51 | 6.00 | 0.00 |
| A_51_P245796 | NM_029083 | Ddit4     | 74747  | DNA-damage-inducible transcript 4                                            | 4.67  | 5.98 | 0.00 |
| A_52_P435154 | NM_172648 | Ifi205    | 226695 | interferon activated gene 205                                                | 4.32  | 5.98 | 0.00 |
| A_52_P110052 | NM_010045 | Darc      | 13349  | Duffy blood group, chemokine receptor                                        | 6.28  | 5.98 | 0.00 |

|              |            |          |        |                                                                                                     |      |      |      |
|--------------|------------|----------|--------|-----------------------------------------------------------------------------------------------------|------|------|------|
| A_52_P228491 | NM_0010251 | Lrig2    | 269473 | leucine-rich repeats and immunoglobulin-like domains 2                                              | 5.65 | 5.95 | 0.00 |
| A_52_P193533 | AK159732   | Slc25a30 | 67554  | solute carrier family 25, member 30                                                                 | 4.14 | 5.94 | 0.00 |
| A_51_P153063 | NM_029310  | Fabp12   | 75497  | fatty acid binding protein 12<br>protein prenyltransferase alpha subunit repeat<br>containing 1     | 7.21 | 5.92 | 0.00 |
| A_51_P168981 | AK015225   | Ptar1    | 72351  | containing 1                                                                                        | 4.60 | 5.89 | 0.00 |
| A_51_P454873 | NM_023456  | Npy      | 109648 | neuropeptide Y                                                                                      | 9.40 | 5.89 | 0.00 |
| A_51_P361650 | NM_009117  | Saa1     | 20208  | serum amyloid A 1                                                                                   | 4.26 | 5.88 | 0.00 |
| A_52_P138126 | NM_133232  | Pfkfb3   | 170768 | 6-phosphofructo-2-kinase/fructose-2,6-biphosphatase 3                                               | 2.85 | 5.86 | 0.05 |
| A_52_P155849 | NM_0010391 | Arl4a    | 11861  | ADP-ribosylation factor-like 4A                                                                     | 5.98 | 5.84 | 0.00 |
| A_51_P383689 | NM_010220  | Fkbp5    | 14229  | FK506 binding protein 5                                                                             | 9.12 | 5.83 | 0.00 |
| A_52_P533817 | AK009185   | Barx2    | 12023  | BarH-like homeobox 2                                                                                | 5.91 | 5.83 | 0.00 |
| A_51_P134812 | NM_026929  | Chac1    | 69065  | ChaC, cation transport regulator-like 1 (E. coli)                                                   | 4.25 | 5.82 | 0.00 |
| A_52_P220810 | NM_144551  | Trib2    | 217410 | tribbles homolog 2 (Drosophila)                                                                     | 6.52 | 5.82 | 0.00 |
| A_51_P165182 | NM_028967  | Batf2    | 74481  | basic leucine zipper transcription factor, ATF-like 2                                               | 5.87 | 5.81 | 0.00 |
| A_52_P492189 | NA         | NA       | NA     | NA                                                                                                  | 4.72 | 5.77 | 0.00 |
| A_52_P574291 | AK015681   | Chic2    | 74277  | cysteine-rich hydrophobic domain 2<br>SAM domain, SH3 domain and nuclear localization<br>signals, 1 | 4.07 | 5.77 | 0.00 |
| A_52_P646832 | NM_023380  | Samsn1   | 67742  | signals, 1                                                                                          | 8.89 | 5.77 | 0.00 |
| A_52_P61786  | NM_008211  | H3f3b    | 15081  | H3 histone, family 3B                                                                               | 4.50 | 5.76 | 0.00 |
| A_51_P463846 | NM_145545  | Gbp6     | 229900 | guanylate binding protein 6                                                                         | 4.00 | 5.76 | 0.00 |
| A_52_P661071 | NR_003270  | Snhg3    | 399101 | small nucleolar RNA host gene (non-protein coding) 3                                                | 5.16 | 5.74 | 0.00 |
| A_51_P324110 | NM_144808  | Slc39a14 | 213053 | solute carrier family 39 (zinc transporter), member 14                                              | 6.53 | 5.71 | 0.00 |
| A_52_P68440  | NA         | NA       | NA     | NA                                                                                                  | 8.52 | 5.70 | 0.00 |
| A_52_P590168 | NM_009375  | Tg       | 21819  | thyroglobulin                                                                                       | 9.14 | 5.70 | 0.00 |
| A_52_P337899 | NM_010220  | Fkbp5    | 14229  | FK506 binding protein 5                                                                             | 8.69 | 5.69 | 0.00 |
| A_51_P268053 | NM_008696  | Map4k4   | 26921  | mitogen-activated protein kinase kinase kinase kinase 4                                             | 6.50 | 5.67 | 0.00 |
| A_52_P88878  | NM_020043  | Igdcc4   | 56741  | immunoglobulin superfamily, DCC subclass, member 4                                                  | 4.34 | 5.65 | 0.00 |

|              |           |                 |        |                                                            |       |      |      |
|--------------|-----------|-----------------|--------|------------------------------------------------------------|-------|------|------|
| A_52_P35217  | NM_007570 | Btg2            | 12227  | B-cell translocation gene 2, anti-proliferative            | 4.98  | 5.65 | 0.00 |
| A_51_P394190 | NM_010723 | Lmo4            | 16911  | LIM domain only 4                                          | 6.82  | 5.64 | 0.00 |
| A_51_P183812 | NM_011410 | Slnf4           | 20558  | schlafen 4                                                 | 7.52  | 5.62 | 0.00 |
| A_51_P346964 | NM_029844 | Mrap            | 77037  | melanocortin 2 receptor accessory protein                  | 7.32  | 5.61 | 0.00 |
| A_51_P217218 | NM_031168 | Il6             | 16193  | interleukin 6                                              | 6.52  | 5.60 | 0.00 |
| A_52_P424308 | NM_176998 | 5730410E1319613 |        | RIKEN cDNA 5730410E15 gene                                 | 7.89  | 5.60 | 0.00 |
|              |           |                 |        | membrane-spanning 4-domains, subfamily A, member           |       |      |      |
| A_51_P149714 | NM_026835 | Ms4a6d          | 68774  | 6D                                                         | 7.55  | 5.60 | 0.00 |
| A_52_P594756 | NM_023048 | Asb4            | 65255  | ankyrin repeat and SOCS box-containing 4                   | 8.95  | 5.59 | 0.00 |
| A_52_P655778 | XR_002713 | NA              | NA     | NA                                                         | 6.01  | 5.58 | 0.00 |
| A_51_P495462 | AK018118  | Gad2            | 14417  | glutamic acid decarboxylase 2                              | 4.72  | 5.56 | 0.00 |
| A_51_P144264 | NM_008452 | Klf2            | 16598  | Kruppel-like factor 2 (lung)                               | 3.58  | 5.55 | 0.01 |
| A_51_P513504 | NM_016810 | Gosr1           | 53334  | golgi SNAP receptor complex member 1                       | 6.44  | 5.53 | 0.00 |
| A_52_P676686 | NM_175121 | Slc38a2         | 67760  | solute carrier family 38, member 2                         | 7.04  | 5.52 | 0.00 |
| A_51_P428913 | D38379    | Pkm2            | 18746  | pyruvate kinase, muscle                                    | 8.37  | 5.51 | 0.00 |
| A_52_P414464 | NM_207649 | Rcan2           | 53901  | regulator of calcineurin 2                                 | 6.66  | 5.48 | 0.00 |
| A_52_P263673 | NM_177101 | 4833442J1320204 |        | RIKEN cDNA 4833442J19 gene                                 | 5.55  | 5.46 | 0.00 |
| A_51_P333274 | NM_013542 | Gzmb            | 14939  | granzyme B                                                 | 6.93  | 5.44 | 0.00 |
| A_51_P420489 | NM_134246 | Acot3           | 171281 | acyl-CoA thioesterase 3                                    | 3.94  | 5.44 | 0.00 |
| A_51_P421140 | NM_026473 | Tubb6           | 67951  | tubulin, beta 6                                            | 6.96  | 5.43 | 0.00 |
| A_52_P131458 | NM_027238 | Ttc39b          | 69863  | tetratricopeptide repeat domain 39B                        | 6.20  | 5.43 | 0.00 |
|              |           |                 |        | avian reticuloendotheliosis viral (v-rel) oncogene related |       |      |      |
| A_51_P389751 | NM_009046 | Relb            | 19698  | B                                                          | 3.80  | 5.43 | 0.00 |
| A_52_P306305 | NM_001035 | Akap2           | 11641  | A kinase (PRKA) anchor protein 2                           | 6.26  | 5.41 | 0.00 |
| A_51_P440535 | NM_029005 | Mlkl            | 74568  | mixed lineage kinase domain-like                           | 7.00  | 5.41 | 0.00 |
| A_52_P616332 | NM_153389 | Atp10d          | 231287 | ATPase, class V, type 10D                                  | 9.16  | 5.40 | 0.00 |
| A_51_P427264 | NM_181039 | Lphn1           | 330814 | latrophilin 1                                              | 10.22 | 5.40 | 0.00 |
|              |           |                 |        | sema domain, transmembrane domain (TM), and                |       |      |      |
| A_51_P417952 | NM_013662 | Sema6b          | 20359  | cytoplasmic domain, (semaphorin) 6B                        | 8.43  | 5.39 | 0.00 |
| A_51_P382152 | NM_011171 | Procr           | 19124  | protein C receptor, endothelial                            | 6.93  | 5.37 | 0.00 |
| A_51_P124254 | NM_009931 | Col4a1          | 12826  | collagen, type IV, alpha 1                                 | 7.52  | 5.37 | 0.00 |
| A_52_P102931 | AK087160  | Gimap5          | 317757 | GTPase, IMAP family member 5                               | 6.51  | 5.36 | 0.00 |
| A_51_P306839 | NM_025465 | 1810029B166282  |        | RIKEN cDNA 1810029B16 gene                                 | 3.35  | 5.36 | 0.01 |
| A_51_P492488 | NM_178204 | Hist1h3d        | 319149 | histone cluster 1, H3d                                     | 4.34  | 5.34 | 0.00 |

|              |           |           |        |                                                       |       |      |      |
|--------------|-----------|-----------|--------|-------------------------------------------------------|-------|------|------|
| A_52_P437066 | XM_905410 | LOC631287 | 631287 | similar to interferon induced transmembrane protein 2 | 12.49 | 5.31 | 0.00 |
| A_52_P254607 | NM_019442 | Stk19     | 54402  | serine/threonine kinase 19                            | 2.82  | 5.30 | 0.05 |
| A_52_P129756 | NM_020559 | Alas1     | 11655  | aminolevulinic acid synthase 1                        | 4.77  | 5.30 | 0.00 |
| A_51_P383032 | NM_010819 | Clec4d    | 17474  | C-type lectin domain family 4, member d               | 7.29  | 5.30 | 0.00 |
| A_51_P263246 | NM_008748 | Dusp8     | 18218  | dual specificity phosphatase 8                        | 4.51  | 5.28 | 0.00 |
| A_52_P618807 | NM_133656 | Crk       | 12928  | v-crk sarcoma virus CT10 oncogene homolog (avian)     | 6.72  | 5.27 | 0.00 |
| A_52_P431615 | XM_001000 | Gm1966    | 434223 | predicted gene 1966                                   | 4.30  | 5.27 | 0.00 |
| A_51_P503162 | NM_011803 | Klf6      | 23849  | Kruppel-like factor 6                                 | 3.65  | 5.26 | 0.01 |
| A_52_P117408 | NM_009375 | Tg        | 21819  | thyroglobulin                                         | 8.42  | 5.25 | 0.00 |
| A_51_P239654 | NM_010444 | Nr4a1     | 15370  | nuclear receptor subfamily 4, group A, member 1       | 4.11  | 5.25 | 0.00 |
| A_51_P451346 | NM_011803 | Klf6      | 23849  | Kruppel-like factor 6                                 | 3.80  | 5.25 | 0.00 |
| A_52_P139579 | NM_011710 | Wars      | 22375  | tryptophanyl-tRNA synthetase                          | 5.58  | 5.25 | 0.00 |
| A_52_P15388  | NM_008522 | Ltf       | 17002  | lactotransferrin                                      | 5.76  | 5.24 | 0.00 |
| A_51_P387123 | NM_011854 | Oasl2     | 23962  | 2'-5' oligoadenylate synthetase-like 2                | 5.69  | 5.24 | 0.00 |
| A_52_P658945 | XM_973796 | NA        | NA     | NA                                                    | 2.99  | 5.23 | 0.03 |
| A_51_P159610 | NM_207202 | Ccdc120   | 54648  | coiled-coil domain containing 120                     | 10.28 | 5.22 | 0.00 |
| A_52_P244236 | AK013215  | Tmem87b   | 72477  | transmembrane protein 87B                             | 7.66  | 5.19 | 0.00 |
| A_51_P418116 | NM_146162 | Tmem119   | 231633 | transmembrane protein 119                             | 8.25  | 5.17 | 0.00 |
| A_52_P619287 | BC054101  | NA        | NA     | NA                                                    | 9.42  | 5.17 | 0.00 |
| A_51_P161362 | NM_145552 | Gnl2      | 230737 | guanine nucleotide binding protein-like 2 (nucleolar) | 7.30  | 5.16 | 0.00 |
| A_51_P452506 | NM_145538 | Tmem189   | 407243 | transmembrane protein 189                             | 5.75  | 5.11 | 0.00 |
| A_52_P510987 | NM_175628 | A2m       | 232345 | alpha-2-macroglobulin                                 | 3.01  | 5.11 | 0.03 |
| A_51_P359462 | NM_178216 | Hist2h3c1 | 15077  | histone cluster 2, H3c1                               | 4.12  | 5.11 | 0.00 |
| A_51_P262515 | NM_172603 | Phf11     | 219131 | PHD finger protein 11                                 | 6.60  | 5.10 | 0.00 |
| A_52_P116501 | NA        | NA        | NA     | NA                                                    | 9.81  | 5.10 | 0.00 |
| A_52_P35895  | NM_001035 | Akap2     | 11641  | A kinase (PRKA) anchor protein 2                      | 7.15  | 5.07 | 0.00 |
| A_51_P262171 | NM_008326 | Irgm1     | 15944  | immunity-related GTPase family M member 1             | 3.23  | 5.07 | 0.02 |
| A_52_P925197 | NM_007570 | Btg2      | 12227  | B-cell translocation gene 2, anti-proliferative       | 4.89  | 5.06 | 0.00 |
| A_52_P425839 | NM_181596 | Retnlg    | 245195 | resistin like gamma                                   | 6.16  | 5.05 | 0.00 |
| A_52_P150212 | NM_011099 | Pkm2      | 18746  | pyruvate kinase, muscle                               | 9.49  | 5.04 | 0.00 |
| A_52_P518827 | NM_009931 | Col4a1    | 12826  | collagen, type IV, alpha 1                            | 8.43  | 5.02 | 0.00 |



|               |           |         |        |                                                                                                |      |      |      |
|---------------|-----------|---------|--------|------------------------------------------------------------------------------------------------|------|------|------|
| A_52_P238159  | BC042188  | Gm9975  | 327988 | predicted gene 9975                                                                            | 5.82 | 5.01 | 0.00 |
| A_51_P465211  | NM_026323 | Wfdc2   | 67701  | WAP four-disulfide core domain 2                                                               | 4.29 | 5.01 | 0.00 |
| A_51_P212782  | NM_008361 | Il1b    | 16176  | interleukin 1 beta                                                                             | 6.17 | 5.00 | 0.00 |
| A_52_P489295  | NM_009621 | Adamts1 | 11504  | a disintegrin-like and metalloproteinase (reprolysin type) with thrombospondin type 1 motif, 1 | 8.15 | 5.00 | 0.00 |
| A_51_P401797  | NM_013599 | Mmp9    | 17395  | matrix metalloproteinase 9                                                                     | 7.96 | 4.97 | 0.00 |
| A_52_P311491  | BC060722  | Ibtk    | 108837 | inhibitor of Bruton agammaglobulinemia tyrosine kinase                                         | 5.47 | 4.97 | 0.00 |
| A_52_P616392  | NM_183426 | Sbno2   | 216161 | strawberry notch homolog 2 (Drosophila)                                                        | 5.56 | 4.96 | 0.00 |
| A_51_P452629  | NM_011905 | Tlr2    | 24088  | toll-like receptor 2                                                                           | 3.78 | 4.94 | 0.00 |
| A_52_P294510  | NM_145594 | Fgl1    | 234199 | fibrinogen-like protein 1                                                                      | 5.34 | 4.94 | 0.00 |
| A_51_P463765  | NM_011595 | Timp3   | 21859  | tissue inhibitor of metalloproteinase 3                                                        | 5.23 | 4.93 | 0.00 |
| A_51_P464918  | NM_019453 | Mefv    | 54483  | Mediterranean fever                                                                            | 7.90 | 4.92 | 0.00 |
| A_51_P510713  | NM_020583 | Isg20   | 57444  | interferon-stimulated protein                                                                  | 2.70 | 4.89 | 0.07 |
| A_52_P608322  | NM_010755 | Maff    | 17133  | v-maf musculoaponeurotic fibrosarcoma oncogene family, protein F (avian)                       | 3.01 | 4.88 | 0.03 |
| A_51_P128929  | NM_020559 | Alas1   | 11655  | aminolevulinic acid synthase 1                                                                 | 5.23 | 4.88 | 0.00 |
| A_51_P374646  | AK050573  | NA      | NA     | NA                                                                                             | 3.17 | 4.86 | 0.02 |
| A_52_P1173559 | NA        | NA      | NA     | NA                                                                                             | 5.28 | 4.86 | 0.00 |
| A_51_P268831  | NM_172659 | Slc2a6  | 227659 | solute carrier family 2 (facilitated glucose transporter), member 6                            | 7.96 | 4.85 | 0.00 |
| A_52_P65237   | NM_145356 | Zbtb7c  | 207259 | zinc finger and BTB domain containing 7C                                                       | 5.61 | 4.84 | 0.00 |
| A_51_P427563  | NM_025815 | Cpne8   | 66871  | copine VIII                                                                                    | 5.73 | 4.84 | 0.00 |
| A_51_P398878  | NM_030724 | Uck2    | 80914  | uridine-cytidine kinase 2                                                                      | 7.11 | 4.83 | 0.00 |
| A_52_P281888  | AK016729  | NA      | NA     | NA                                                                                             | 7.44 | 4.83 | 0.00 |
| A_52_P447064  | AK076401  | NA      | NA     | NA                                                                                             | 3.72 | 4.82 | 0.01 |
| A_51_P193336  | NM_016773 | Nucb2   | 53322  | nucleobindin 2                                                                                 | 5.98 | 4.80 | 0.00 |
| A_52_P249965  | NM_011723 | Xdh     | 22436  | xanthine dehydrogenase                                                                         | 5.02 | 4.80 | 0.00 |
| A_52_P131423  | AK007371  | Mbd1    | 17190  | methyl-CpG binding domain protein 1                                                            | 4.28 | 4.80 | 0.00 |
| A_52_P500027  | NM_017373 | Nfil3   | 18030  | nuclear factor, interleukin 3, regulated                                                       | 2.87 | 4.79 | 0.04 |
| A_51_P352924  | NM_010193 | Fem1b   | 14155  | feminization 1 homolog b (C. elegans)                                                          | 3.38 | 4.79 | 0.01 |
| A_51_P411917  | NM_010258 | Gata6   | 14465  | GATA binding protein 6                                                                         | 9.01 | 4.77 | 0.00 |

|              |           |           |        |                                                                                          |      |      |      |
|--------------|-----------|-----------|--------|------------------------------------------------------------------------------------------|------|------|------|
| A_51_P211732 | NM_008977 | Ptpn2     | 19255  | protein tyrosine phosphatase, non-receptor type 2                                        | 3.97 | 4.77 | 0.00 |
| A_52_P590474 | NM_019937 | Ccnl1     | 56706  | cyclin L1                                                                                | 2.97 | 4.77 | 0.03 |
| A_51_P400166 | NM_011637 | Trex1     | 22040  | three prime repair exonuclease 1                                                         | 3.02 | 4.76 | 0.03 |
| A_51_P390538 | XM_129176 | NA        | NA     | NA                                                                                       | 6.11 | 4.76 | 0.00 |
| A_52_P283628 | NM_148945 | Rps6ka3   | 110651 | ribosomal protein S6 kinase polypeptide 3                                                | 6.71 | 4.75 | 0.00 |
| A_51_P342916 | NM_020283 | B3galt1   | 26877  | UDP-Gal:betaGlcNAc beta 1,3-galactosyltransferase, polypeptide 1                         | 6.73 | 4.74 | 0.00 |
| A_51_P453142 | BC060722  | Ibtk      | 108837 | inhibitor of Bruton agammaglobulinemia tyrosine kinase                                   | 5.57 | 4.72 | 0.00 |
| A_52_P195107 | NM_021359 | Itgb6     | 16420  | integrin beta 6                                                                          | 5.25 | 4.72 | 0.00 |
| A_51_P501218 | AK154817  | 3110043O2 | 73205  | RIKEN cDNA 3110043O21 gene                                                               | 4.50 | 4.71 | 0.00 |
| A_51_P159201 | NM_008416 | Junb      | 16477  | Jun-B oncogene                                                                           | 5.16 | 4.71 | 0.00 |
| A_52_P162967 | NM_007642 | Cd28      | 12487  | CD28 antigen                                                                             | 7.69 | 4.71 | 0.00 |
| A_51_P156857 | NM_134133 | 2010002N0 | 106878 | RIKEN cDNA 2010002N04 gene                                                               | 5.45 | 4.70 | 0.00 |
| A_51_P479230 | NM_023455 | Nat8      | 68396  | N-acetyltransferase 8 (GCN5-related, putative)                                           | 5.02 | 4.70 | 0.00 |
| A_51_P144090 | NM_030696 | Slc16a3   | 80879  | solute carrier family 16 (monocarboxylic acid transporters), member 3                    | 9.54 | 4.70 | 0.00 |
| A_51_P515883 | NM_139198 | Plac8     | 231507 | placenta-specific 8                                                                      | 8.02 | 4.68 | 0.00 |
| A_52_P559618 | NM_030694 | Ifitm2    | 80876  | interferon induced transmembrane protein 2                                               | 7.39 | 4.67 | 0.00 |
| A_52_P135398 | NA        | NA        | NA     | NA                                                                                       | 6.59 | 4.67 | 0.00 |
| A_51_P378415 | NM_146002 | Rhbdd2    | 215160 | rhomboid domain containing 2                                                             | 5.11 | 4.67 | 0.00 |
| A_52_P840743 | NA        | NA        | NA     | NA                                                                                       | 5.63 | 4.66 | 0.00 |
| A_51_P381821 | NM_008046 | Fst       | 14313  | follicle-stimulating hormone receptor 1                                                  | 3.60 | 4.66 | 0.01 |
| A_52_P135392 | BC004016  | Uck2      | 80914  | uridine-cytidine kinase 2                                                                | 6.23 | 4.65 | 0.00 |
| A_51_P345367 | NM_010724 | Psmb8     | 16913  | proteasome (prosome, macropain) subunit, beta type 8 (large multifunctional peptidase 7) | 8.21 | 4.64 | 0.00 |
| A_51_P255456 | NM_009994 | Cyp1b1    | 13078  | cytochrome P450, family 1, subfamily b, polypeptide 1                                    | 5.72 | 4.61 | 0.00 |
| A_52_P331911 | NM_010120 | Eif1a     | 13664  | eukaryotic translation initiation factor 1A                                              | 6.54 | 4.61 | 0.00 |
| A_51_P102740 | AK084873  | NA        | NA     | NA                                                                                       | 3.15 | 4.61 | 0.02 |
| A_51_P153765 | NM_024495 | Car13     | 71934  | carbonic anhydrase 13                                                                    | 5.91 | 4.60 | 0.00 |
| A_52_P957500 | BF719154  | NA        | NA     | NA                                                                                       | 4.16 | 4.58 | 0.00 |
| A_52_P371922 | XM_988404 | NA        | NA     | NA                                                                                       | 9.23 | 4.58 | 0.00 |

|               |           |                 |        |                                                                  |      |      |      |
|---------------|-----------|-----------------|--------|------------------------------------------------------------------|------|------|------|
| A_52_P202895  | NM_001005 | Mtus1           | 102103 | mitochondrial tumor suppressor 1                                 | 7.25 | 4.58 | 0.00 |
| A_51_P478722  | NM_011579 | Tgtp            | 21822  | T-cell specific GTPase                                           | 3.06 | 4.58 | 0.02 |
| A_52_P325552  | NM_145355 | Rnf185          | 193670 | ring finger protein 185                                          | 5.46 | 4.57 | 0.00 |
| A_51_P377620  | NM_001033 | Mnda            | 381308 | myeloid cell nuclear differentiation antigen                     | 3.38 | 4.57 | 0.01 |
| A_52_P153864  | NM_010723 | Lmo4            | 16911  | LIM domain only 4                                                | 5.57 | 4.57 | 0.00 |
| A_52_P563825  | NM_020283 | B3galt1         | 26877  | UDP-Gal:betaGlcNAc beta 1,3-galactosyltransferase, polypeptide 1 | 6.52 | 4.57 | 0.00 |
| A_52_P443715  | AK076444  | Tcfcp2          | 21422  | transcription factor CP2                                         | 3.69 | 4.56 | 0.01 |
| A_51_P497100  | NM_010706 | Lgals4          | 16855  | lectin, galactose binding, soluble 4                             | 4.02 | 4.56 | 0.00 |
| A_51_P481210  | NM_177429 | Ofd1            | 237222 | oral-facial-digital syndrome 1 gene homolog (human)              | 5.26 | 4.55 | 0.00 |
| A_52_P1020860 | AK153119  | AW112010        | 107350 | expressed sequence AW112010                                      | 6.16 | 4.54 | 0.00 |
| A_52_P67643   | AK036004  | Mtor            | 56717  | mechanistic target of rapamycin (serine/threonine kinase)        | 6.60 | 4.54 | 0.00 |
| A_51_P458384  | NM_175121 | Slc38a2         | 67760  | solute carrier family 38, member 2                               | 4.14 | 4.53 | 0.00 |
| A_52_P184257  | NM_027399 | Steap1          | 70358  | six transmembrane epithelial antigen of the prostate 1           | 5.71 | 4.53 | 0.00 |
| A_51_P181517  | NM_144559 | Fcgr4           | 246256 | Fc receptor, IgG, low affinity IV                                | 7.97 | 4.52 | 0.00 |
| A_51_P401343  | NM_019500 | Cldn14          | 56173  | claudin 14                                                       | 5.41 | 4.50 | 0.00 |
| A_51_P408346  | NM_008329 | Ifi204          | 15951  | interferon activated gene 204                                    | 6.48 | 4.49 | 0.00 |
| A_51_P327261  | NM_021327 | Tnip1           | 57783  | TNFAIP3 interacting protein 1                                    | 7.30 | 4.49 | 0.00 |
| A_52_P275324  | AK050568  | Rbm39           | 170791 | RNA binding motif protein 39                                     | 2.95 | 4.48 | 0.03 |
| A_51_P155935  | NM_144905 | 6330416G1230279 |        | RIKEN cDNA 6330416G13 gene                                       | 5.73 | 4.47 | 0.00 |
| A_51_P257951  | NM_020509 | Retnla          | 57262  | resistin like alpha                                              | 5.11 | 4.47 | 0.00 |
| A_51_P327920  | AK030273  | St7l            | 229681 | suppression of tumorigenicity 7-like                             | 4.56 | 4.47 | 0.00 |
| A_52_P327176  | NM_018884 | Pdzrn3          | 55983  | PDZ domain containing RING finger 3                              | 7.45 | 4.46 | 0.00 |
| A_52_P593110  | AK015056  | Ptbp2           | 56195  | polypyrimidine tract binding protein 2                           | 3.10 | 4.46 | 0.02 |
| A_52_P398925  | NM_173869 | Stfa2l1         | 268885 | stefin A2 like 1                                                 | 6.58 | 4.45 | 0.00 |
| A_51_P458258  | NM_011888 | Ccl19           | 24047  | chemokine (C-C motif) ligand 19                                  | 4.21 | 4.45 | 0.00 |
| A_52_P199633  | NM_199146 | AI451617        | 209387 | expressed sequence AI451617                                      | 3.93 | 4.43 | 0.00 |
| A_51_P167979  | XM_001003 | NA              | NA     | NA                                                               | 4.84 | 4.43 | 0.00 |
| A_51_P311611  | NM_010045 | Darc            | 13349  | Duffy blood group, chemokine receptor                            | 5.63 | 4.42 | 0.00 |
| A_52_P399998  | NM_016920 | Atp6v0a1        | 11975  | ATPase, H+ transporting, lysosomal V0 subunit A1                 | 5.94 | 4.42 | 0.00 |
| A_52_P491569  | NM_028820 | 1700017B074211  |        | RIKEN cDNA 1700017B05 gene                                       | 3.34 | 4.42 | 0.01 |

|              |           |           |        |                                                                                                   |      |      |      |
|--------------|-----------|-----------|--------|---------------------------------------------------------------------------------------------------|------|------|------|
| A_51_P429087 | NM_133669 | Rp2h      | 19889  | retinitis pigmentosa 2 homolog (human)                                                            | 7.71 | 4.41 | 0.00 |
| A_52_P693104 | AV147182  | NA        | NA     | NA                                                                                                | 8.93 | 4.40 | 0.00 |
| A_52_P167278 | NM_172308 | Mthfd1l   | 270685 | methylenetetrahydrofolate dehydrogenase (NADP+ dependent) 1-like                                  | 8.77 | 4.39 | 0.00 |
| A_52_P463977 | NM_197986 | Tmem140   | 68487  | transmembrane protein 140                                                                         | 2.88 | 4.38 | 0.04 |
| A_51_P348280 | NM_008359 | Il17ra    | 16172  | interleukin 17 receptor A                                                                         | 4.29 | 4.38 | 0.00 |
| A_52_P415440 | AK132208  | Rps12     | 20042  | ribosomal protein S12                                                                             | 7.54 | 4.37 | 0.00 |
| A_52_P467389 | NM_023044 | Slc15a3   | 65221  | solute carrier family 15, member 3                                                                | 5.86 | 4.36 | 0.00 |
| A_51_P276993 | NM_030720 | Gpr84     | 80910  | G protein-coupled receptor 84                                                                     | 4.15 | 4.36 | 0.00 |
| A_51_P148093 | NM_008984 | Ptpm      | 19274  | protein tyrosine phosphatase, receptor type, M proteasome (prosome, macropain) subunit, beta type | 4.19 | 4.35 | 0.00 |
| A_52_P570266 | NM_013640 | Psmb10    | 19171  | 10                                                                                                | 6.89 | 4.35 | 0.00 |
| A_51_P224227 | XM_900563 | NA        | NA     | NA                                                                                                | 6.04 | 4.34 | 0.00 |
| A_52_P86965  | XM_980696 | AI607873  | 226691 | expressed sequence AI607873                                                                       | 5.12 | 4.34 | 0.00 |
| A_51_P202745 | NM_026083 | Zc3h13    | 67302  | zinc finger CCCH type containing 13                                                               | 3.67 | 4.34 | 0.01 |
| A_51_P494241 | NM_007534 | Bcl2a1b   | 12045  | B-cell leukemia/lymphoma 2 related protein A1b                                                    | 5.49 | 4.33 | 0.00 |
| A_52_P228621 | NM_011610 | Tnfrsf1b  | 21938  | tumor necrosis factor receptor superfamily, member 1b                                             | 5.67 | 4.33 | 0.00 |
| A_52_P16657  | BC031488  | Tmem87b   | 72477  | transmembrane protein 87B                                                                         | 5.50 | 4.31 | 0.00 |
| A_51_P483473 | NM_011375 | St3gal5   | 20454  | ST3 beta-galactoside alpha-2,3-sialyltransferase 5                                                | 3.78 | 4.30 | 0.00 |
| A_51_P401907 | AK089257  | Gm5483    | 433016 | predicted gene 5483                                                                               | 8.47 | 4.30 | 0.00 |
| A_52_P282762 | NM_010851 | Myd88     | 17874  | myeloid differentiation primary response gene 88                                                  | 7.33 | 4.30 | 0.00 |
| A_51_P258150 | NM_007408 | Plin2     | 11520  | perilipin 2                                                                                       | 7.37 | 4.29 | 0.00 |
| A_51_P312121 | NM_011723 | Xdh       | 22436  | xanthine dehydrogenase                                                                            | 5.37 | 4.28 | 0.00 |
| A_52_P237357 | BC010335  | NA        | NA     | NA                                                                                                | 4.32 | 4.27 | 0.00 |
| A_51_P396198 | BG296545  | NA        | NA     | NA                                                                                                | 7.78 | 4.27 | 0.00 |
| A_51_P412160 | NM_172572 | Rhbdf2    | 217344 | rhomboid 5 homolog 2 (Drosophila)                                                                 | 4.48 | 4.26 | 0.00 |
| A_52_P98140  | BE865018  | NA        | NA     | NA                                                                                                | 3.18 | 4.26 | 0.02 |
| A_52_P334562 | NM_009504 | Vdr       | 22337  | vitamin D receptor                                                                                | 5.03 | 4.26 | 0.00 |
| A_52_P442234 | NM_008197 | H1f0      | 14958  | H1 histone family, member 0                                                                       | 3.69 | 4.25 | 0.01 |
| A_51_P380861 | AK172225  | 9130208E0 | 77670  | RIKEN cDNA 9130208E07 gene                                                                        | 3.63 | 4.25 | 0.01 |
| A_51_P201982 | NM_007426 | Angpt2    | 11601  | angiopoietin 2                                                                                    | 5.49 | 4.24 | 0.00 |
| A_52_P601829 | AK035485  | NA        | NA     | NA                                                                                                | 5.01 | 4.23 | 0.00 |

|              |           |           |        |                                                                                                                                                   |      |      |      |
|--------------|-----------|-----------|--------|---------------------------------------------------------------------------------------------------------------------------------------------------|------|------|------|
| A_52_P619820 | NM_001033 | Pnrc1     | 108767 | proline-rich nuclear receptor coactivator 1                                                                                                       | 3.87 | 4.22 | 0.00 |
| A_52_P382854 | NM_172572 | Rhbdf2    | 217344 | rhomboid 5 homolog 2 (Drosophila)                                                                                                                 | 4.80 | 4.22 | 0.00 |
| A_51_P454008 | NM_008489 | Lbp       | 16803  | lipopolysaccharide binding protein                                                                                                                | 5.48 | 4.22 | 0.00 |
| A_51_P494597 | AK137465  | BC013712  | 230787 | cDNA sequence BC013712                                                                                                                            | 3.13 | 4.22 | 0.02 |
| A_51_P172292 | NM_018746 | Itih4     | 16427  | inter alpha-trypsin inhibitor, heavy chain 4                                                                                                      | 6.15 | 4.20 | 0.00 |
| A_52_P315280 | NM_010918 | Nktr      | 18087  | natural killer tumor recognition sequence                                                                                                         | 4.45 | 4.19 | 0.00 |
| A_52_P275864 | NM_144905 | 6330416G1 | 230279 | RIKEN cDNA 6330416G13 gene                                                                                                                        | 7.63 | 4.19 | 0.00 |
| A_52_P88591  | NM_030262 | Pofut2    | 80294  | protein O-fucosyltransferase 2                                                                                                                    | 6.59 | 4.19 | 0.00 |
| A_51_P439876 | AK020498  | Map4k4    | 26921  | mitogen-activated protein kinase kinase kinase kinase 4<br>solute carrier family 11 (proton-coupled divalent metal<br>ion transporters), member 2 | 7.09 | 4.19 | 0.00 |
| A_52_P196476 | AK148276  | Slc11a2   | 18174  | ion transporters), member 2                                                                                                                       | 4.58 | 4.19 | 0.00 |
| A_52_P135873 | NA        | NA        | NA     | NA                                                                                                                                                | 2.80 | 4.19 | 0.05 |
| A_52_P424037 | NM_019553 | Ddx21     | 56200  | DEAD (Asp-Glu-Ala-Asp) box polypeptide 21                                                                                                         | 7.85 | 4.17 | 0.00 |
| A_51_P292008 | NM_008161 | Gpx3      | 14778  | glutathione peroxidase 3                                                                                                                          | 5.25 | 4.17 | 0.00 |
| A_51_P487690 | NM_133871 | Ifi44     | 99899  | interferon-induced protein 44                                                                                                                     | 4.08 | 4.17 | 0.00 |
| A_51_P345366 | NM_010724 | Psmb8     | 16913  | proteasome (prosome, macropain) subunit, beta type 8<br>(large multifunctional peptidase 7)                                                       | 6.74 | 4.17 | 0.00 |
| A_52_P371946 | NM_010579 | Eif6      | 16418  | eukaryotic translation initiation factor 6                                                                                                        | 8.50 | 4.16 | 0.00 |
| A_51_P375138 | L23108    | Cd36      | 12491  | CD36 antigen                                                                                                                                      | 2.94 | 4.16 | 0.03 |
| A_52_P597775 | NM_181444 | Gprc5a    | 232431 | G protein-coupled receptor, family C, group 5, member<br>A                                                                                        | 5.52 | 4.15 | 0.00 |
| A_51_P480855 | NM_021385 | Rad18     | 58186  | RAD18 homolog ( <i>S. cerevisiae</i> )                                                                                                            | 5.59 | 4.15 | 0.00 |
| A_52_P8953   | NM_133669 | Rp2h      | 19889  | retinitis pigmentosa 2 homolog (human)                                                                                                            | 7.55 | 4.14 | 0.00 |
| A_51_P272106 | NM_007705 | Cirbp     | 12696  | cold inducible RNA binding protein                                                                                                                | 8.60 | 4.13 | 0.00 |
| A_51_P398491 | NM_021406 | Trem1     | 58217  | triggering receptor expressed on myeloid cells 1                                                                                                  | 3.84 | 4.13 | 0.00 |
| A_51_P419768 | NM_009061 | Rgs2      | 19735  | regulator of G-protein signaling 2                                                                                                                | 3.88 | 4.12 | 0.00 |
| A_51_P354652 | NM_026232 | Slc25a30  | 67554  | solute carrier family 25, member 30                                                                                                               | 3.36 | 4.12 | 0.01 |
| A_51_P491987 | NM_019955 | Ripk3     | 56532  | receptor-interacting serine-threonine kinase 3                                                                                                    | 8.48 | 4.12 | 0.00 |
| A_52_P31577  | NM_008359 | Il17ra    | 16172  | interleukin 17 receptor A                                                                                                                         | 4.71 | 4.12 | 0.00 |
| A_51_P179334 | NM_029836 | Tspsy12   | 52808  | TSPY-like 2                                                                                                                                       | 4.82 | 4.11 | 0.00 |
| A_52_P180373 | XM_129176 | NA        | NA     | NA                                                                                                                                                | 5.63 | 4.11 | 0.00 |
| A_52_P398554 | NA        | NA        | NA     | NA                                                                                                                                                | 6.46 | 4.10 | 0.00 |
| A_51_P228073 | AK041075  | Susd1     | 634731 | sushi domain containing 1                                                                                                                         | 3.77 | 4.10 | 0.00 |

|              |           |           |        |                                                                                                                                          |       |      |      |
|--------------|-----------|-----------|--------|------------------------------------------------------------------------------------------------------------------------------------------|-------|------|------|
| A_52_P241484 | NM_021525 | Rcl1      | 59028  | RNA terminal phosphate cyclase-like 1                                                                                                    | 4.49  | 4.10 | 0.00 |
| A_51_P300054 | XM_986054 | 4933440N2 | 74471  | RIKEN cDNA 4933440N22 gene                                                                                                               | 5.27  | 4.09 | 0.00 |
| A_51_P136277 | NM_027874 | Csnk1d    | 104318 | casein kinase 1, delta                                                                                                                   | 4.67  | 4.09 | 0.00 |
| A_51_P102096 | NM_010849 | Myc       | 17869  | myelocytomatosis oncogene                                                                                                                | 5.92  | 4.09 | 0.00 |
| A_52_P371949 | AK018313  | Eif6      | 16418  | eukaryotic translation initiation factor 6                                                                                               | 5.88  | 4.08 | 0.00 |
| A_52_P535195 | AK139506  | Gppp1l1   | 77110  | GC-rich promoter binding protein 1-like 1<br>sema domain, immunoglobulin domain (Ig),<br>transmembrane domain (TM) and short cytoplasmic | 6.59  | 4.08 | 0.00 |
| A_51_P170651 | S79463    | Sema4c    | 20353  | domain, (semaphorin) 4C                                                                                                                  | 4.84  | 4.07 | 0.00 |
| A_52_P625880 | AK029366  | Tmem209   | 72649  | transmembrane protein 209                                                                                                                | 6.93  | 4.07 | 0.00 |
| A_51_P197528 | D86232    | Ly6c2     | 1E+08  | lymphocyte antigen 6 complex, locus C2                                                                                                   | 5.78  | 4.07 | 0.00 |
| A_52_P79889  | NM_011065 | Per1      | 18626  | period homolog 1 (Drosophila)                                                                                                            | 4.86  | 4.06 | 0.00 |
| A_51_P153982 | NM_001029 | Cytsb     | 432572 | cytospin B                                                                                                                               | 8.23  | 4.05 | 0.00 |
| A_52_P317356 | XM_900563 | NA        | NA     | NA                                                                                                                                       | 5.85  | 4.05 | 0.00 |
| A_51_P184672 | U21674    | Tcte3     | 21647  | t-complex-associated testis expressed 3                                                                                                  | 5.40  | 4.04 | 0.00 |
| A_52_P254817 | NM_020509 | Retnla    | 57262  | resistin like alpha                                                                                                                      | 4.77  | 4.04 | 0.00 |
| A_51_P362863 | NM_021525 | Rcl1      | 59028  | RNA terminal phosphate cyclase-like 1                                                                                                    | 3.38  | 4.04 | 0.01 |
| A_51_P338443 | NM_020581 | Angptl4   | 57875  | angiopoietin-like 4<br>membrane-spanning 4-domains, subfamily A, member                                                                  | 5.81  | 4.04 | 0.00 |
| A_52_P393488 | NM_029499 | Ms4a4c    | 64380  | 4C                                                                                                                                       | 6.50  | 4.04 | 0.00 |
| A_51_P519295 | NM_009817 | Cast      | 12380  | calpastatin                                                                                                                              | 5.42  | 4.04 | 0.00 |
| A_52_P230938 | NM_010741 | Ly6c1     | 17067  | lymphocyte antigen 6 complex, locus C1                                                                                                   | 6.65  | 4.04 | 0.00 |
| A_51_P446232 | NM_019813 | Dbn1      | 56320  | drebrin 1                                                                                                                                | 7.04  | 4.03 | 0.00 |
| A_51_P276479 | NM_178098 | 4930486L2 | 214639 | RIKEN cDNA 4930486L24 gene                                                                                                               | 7.07  | 4.03 | 0.00 |
| A_51_P204080 | NM_013820 | Hk2       | 15277  | hexokinase 2                                                                                                                             | 5.45  | 4.02 | 0.00 |
| A_52_P417890 | NM_010555 | Il1r2     | 16178  | interleukin 1 receptor, type II                                                                                                          | 9.27  | 4.02 | 0.00 |
| A_52_P477369 | NM_139059 | Csnk1d    | 104318 | casein kinase 1, delta                                                                                                                   | 4.43  | 4.02 | 0.00 |
| A_52_P85864  | NM_010579 | Eif6      | 16418  | eukaryotic translation initiation factor 6                                                                                               | 10.79 | 4.01 | 0.00 |
| A_51_P423091 | NM_008027 | Flot1     | 14251  | flotillin 1                                                                                                                              | 8.93  | 4.01 | 0.00 |
| A_51_P372550 | BC023116  | Cgref1    | 68567  | cell growth regulator with EF hand domain 1                                                                                              | 3.70  | 4.01 | 0.01 |
| A_51_P356283 | NM_133765 | Fbxo31    | 76454  | F-box protein 31                                                                                                                         | 8.96  | 4.00 | 0.00 |
| A_52_P572368 | AK005014  | 1300015D0 | 74161  | RIKEN cDNA 1300015D01 gene                                                                                                               | 5.73  | 4.00 | 0.00 |
| A_51_P367310 | NM_028083 | Chaf1b    | 110749 | chromatin assembly factor 1, subunit B (p60)                                                                                             | 3.02  | 3.99 | 0.03 |
| A_52_P484903 | NM_008037 | Fosl2     | 14284  | fos-like antigen 2                                                                                                                       | 7.11  | 3.99 | 0.00 |

|              |           |          |        |                                                                                                        |      |      |      |
|--------------|-----------|----------|--------|--------------------------------------------------------------------------------------------------------|------|------|------|
| A_51_P499838 | NM_009763 | Bst1     | 12182  | bone marrow stromal cell antigen 1                                                                     | 9.07 | 3.98 | 0.00 |
| A_52_P584058 | NM_001039 | Ivns1abp | 117198 | influenza virus NS1A binding protein                                                                   | 6.71 | 3.96 | 0.00 |
| A_51_P325914 | NM_010591 | Jun      | 16476  | Jun oncogene                                                                                           | 4.75 | 3.96 | 0.00 |
| A_51_P111492 | NM_017373 | Nfil3    | 18030  | nuclear factor, interleukin 3, regulated                                                               | 3.32 | 3.96 | 0.01 |
| A_51_P351481 | NM_019937 | Ccnl1    | 56706  | cyclin L1                                                                                              | 2.75 | 3.95 | 0.06 |
| A_51_P480241 | NM_007921 | Elf3     | 13710  | E74-like factor 3                                                                                      | 3.98 | 3.95 | 0.00 |
| A_52_P411833 | NA        | NA       | NA     | NA                                                                                                     | 3.50 | 3.95 | 0.01 |
| A_52_P364130 | NM_016896 | Map3k14  | 53859  | mitogen-activated protein kinase kinase kinase 14                                                      | 6.34 | 3.93 | 0.00 |
| A_51_P202633 | NM_015766 | Ebi3     | 50498  | Epstein-Barr virus induced gene 3<br>human immunodeficiency virus type I enhancer binding<br>protein 2 | 6.87 | 3.93 | 0.00 |
| A_51_P443754 | NM_010437 | Hivep2   | 15273  | matrix metalloproteinase 7                                                                             | 3.88 | 3.93 | 0.00 |
| A_51_P426096 | NM_010810 | Mmp7     | 17393  | interferon-induced protein with tetratricopeptide<br>repeats 3                                         | 6.25 | 3.93 | 0.00 |
| A_51_P359570 | NM_010501 | Ifit3    | 15959  | serum amyloid P-component                                                                              | 2.85 | 3.91 | 0.05 |
| A_51_P354165 | NM_011318 | Apcs     | 20219  | interferon regulatory factor 8                                                                         | 3.23 | 3.91 | 0.02 |
| A_52_P354823 | NM_008320 | Irf8     | 15900  | collagen, type XIII, alpha 1                                                                           | 4.28 | 3.91 | 0.00 |
| A_51_P240374 | NM_007731 | Col13a1  | 12817  | 3-phosphoglycerate dehydrogenase                                                                       | 6.32 | 3.91 | 0.00 |
| A_51_P408732 | NM_016966 | Phgdh    | 236539 | ring finger protein, LIM domain interacting                                                            | 7.01 | 3.90 | 0.00 |
| A_52_P104761 | NM_011276 | Rlim     | 19820  | transmembrane protein 71                                                                               | 4.31 | 3.90 | 0.00 |
| A_52_P553885 | NM_172514 | Tmem71   | 213068 | alkaline ceramidase 2                                                                                  | 6.11 | 3.90 | 0.00 |
| A_52_P686095 | AK046888  | Acer2    | 230379 | tissue inhibitor of metalloproteinase 1                                                                | 4.15 | 3.89 | 0.00 |
| A_52_P87713  | NM_001044 | Timp1    | 21857  | cytidine 5'-triphosphate synthase                                                                      | 6.40 | 3.89 | 0.00 |
| A_51_P251357 | NM_016748 | Ctps     | 51797  | chemokine (C-C motif) ligand 4                                                                         | 5.89 | 3.87 | 0.00 |
| A_51_P509573 | NM_013652 | Ccl4     | 20303  | TNFAIP3 interacting protein 2                                                                          | 5.28 | 3.87 | 0.00 |
| A_51_P501278 | NM_139064 | Tnip2    | 231130 | SCY1-like 2 ( <i>S. cerevisiae</i> )                                                                   | 5.37 | 3.86 | 0.00 |
| A_52_P605704 | NM_198021 | Scyl2    | 213326 | sorting nexin 20                                                                                       | 5.33 | 3.86 | 0.00 |
| A_51_P309158 | NM_027840 | Snx20    | 71607  | gap junction protein, alpha 4                                                                          | 5.68 | 3.84 | 0.00 |
| A_52_P117352 | NM_008120 | Gja4     | 14612  | a disintegrin-like and metalloproteinase (reprolysin type)<br>with thrombospondin type 1 motif, 4      | 4.23 | 3.84 | 0.00 |
| A_51_P234944 | NM_172845 | Adamts4  | 240913 | outer dense fiber of sperm tails 2                                                                     | 4.39 | 3.84 | 0.00 |
| A_51_P266987 | NM_013615 | Odf2     | 18286  | stromal cell-derived factor 2-like 1                                                                   | 4.55 | 3.84 | 0.00 |
| A_51_P280446 | NM_022324 | Sdf2l1   | 64136  |                                                                                                        | 4.65 | 3.83 | 0.00 |

|              |           |           |        |                                                           |      |      |      |
|--------------|-----------|-----------|--------|-----------------------------------------------------------|------|------|------|
| A_51_P267969 | NM_011259 | Reg3a     | 19694  | regenerating islet-derived 3 alpha                        | 5.13 | 3.82 | 0.00 |
| A_52_P549405 | NM_001039 | Asxl1     | 228790 | additional sex combs like 1 (Drosophila)                  | 4.15 | 3.82 | 0.00 |
| A_51_P439803 | NM_009609 | Actg1     | 11465  | actin, gamma, cytoplasmic 1                               | 3.36 | 3.82 | 0.01 |
| A_51_P228232 | NM_008028 | Flot2     | 14252  | flotillin 2                                               | 6.65 | 3.81 | 0.00 |
| A_51_P305950 | NM_013501 | Cryaa     | 12954  | crystallin, alpha A                                       | 3.43 | 3.81 | 0.01 |
| A_52_P535484 | NM_029000 | Gvin1     | 74558  | GTPase, very large interferon inducible 1                 | 2.91 | 3.81 | 0.04 |
| A_51_P408343 | NM_008329 | Ifi204    | 15951  | interferon activated gene 204                             | 6.36 | 3.81 | 0.00 |
| A_51_P168203 | NM_025446 | Aig1      | 66253  | androgen-induced 1                                        | 6.08 | 3.80 | 0.00 |
| A_51_P230624 | AK171109  | 2010109K1 | 72123  | RIKEN cDNA 2010109K11 gene                                | 4.10 | 3.80 | 0.00 |
| A_52_P89683  | XR_002509 | NA        | NA     | NA                                                        | 5.75 | 3.80 | 0.00 |
| A_51_P292057 | NM_030732 | Tbl1xr1   | 81004  | transducin (beta)-like 1X-linked receptor 1               | 6.80 | 3.79 | 0.00 |
| A_51_P440092 | NM_175240 | Fam187b   | 76415  | family with sequence similarity 187, member B             | 5.25 | 3.79 | 0.00 |
| A_52_P522166 | BU509931  | 2810026P1 | 72655  | RIKEN cDNA 2810026P18 gene                                | 5.68 | 3.79 | 0.00 |
|              |           |           |        | a disintegrin-like and metallopeptidase (reprolysin type) |      |      |      |
| A_52_P49321  | AK078802  | Adamts9   | 101401 | with thrombospondin type 1 motif, 9                       | 6.24 | 3.79 | 0.00 |
| A_52_P310530 | NM_053104 | Rbm9      | 93686  | RNA binding motif protein 9                               | 5.33 | 3.78 | 0.00 |
| A_52_P553890 | AK135584  | Itgb3     | 16416  | integrin beta 3                                           | 6.66 | 3.78 | 0.00 |
| A_51_P201338 | NM_144800 | Mtss1     | 211401 | metastasis suppressor 1                                   | 3.98 | 3.77 | 0.00 |
| A_51_P118637 | NM_026083 | Zc3h13    | 67302  | zinc finger CCCH type containing 13                       | 3.31 | 3.77 | 0.01 |
| A_52_P82765  | NA        | NA        | NA     | NA                                                        | 7.55 | 3.77 | 0.00 |
| A_51_P375680 | XM_129214 | Pcsk5     | 18552  | proprotein convertase subtilisin/kexin type 5             | 7.73 | 3.77 | 0.00 |
| A_51_P282983 | NM_144808 | Slc39a14  | 213053 | solute carrier family 39 (zinc transporter), member 14    | 4.15 | 3.77 | 0.00 |
| A_52_P681787 | NM_007805 | Cyb561    | 13056  | cytochrome b-561                                          | 4.42 | 3.76 | 0.00 |
| A_52_P497235 | NM_026985 | 1810033B1 | 69189  | RIKEN cDNA 1810033B17 gene                                | 6.53 | 3.76 | 0.00 |
| A_51_P496751 | NM_018868 | Nop58     | 55989  | NOP58 ribonucleoprotein homolog (yeast)                   | 5.95 | 3.76 | 0.00 |
| A_51_P188141 | NM_008522 | Ltf       | 17002  | lactotransferrin                                          | 5.18 | 3.75 | 0.00 |
| A_52_P450236 | NM_172713 | Sdad1     | 231452 | SDA1 domain containing 1                                  | 6.85 | 3.75 | 0.00 |
| A_51_P476091 | NA        | NA        | NA     | NA                                                        | 4.05 | 3.75 | 0.00 |
|              |           |           |        | cysteine-rich secretory protein LCCL domain containing    |      |      |      |
| A_51_P501730 | NM_030209 | Crispld2  | 78892  | 2                                                         | 7.51 | 3.74 | 0.00 |
| A_51_P198179 | NM_023141 | Tor3a     | 30935  | torsin family 3, member A                                 | 4.94 | 3.74 | 0.00 |
| A_51_P315754 | NM_028315 | Dis3      | 72662  | DIS3 mitotic control homolog (S. cerevisiae)              | 7.22 | 3.74 | 0.00 |



|              |           |            |        |                                                                       |      |      |      |
|--------------|-----------|------------|--------|-----------------------------------------------------------------------|------|------|------|
| A_51_P397367 | NM_009196 | Slc16a1    | 20501  | solute carrier family 16 (monocarboxylic acid transporters), member 1 | 3.85 | 3.74 | 0.00 |
| A_52_P516296 | NM_145226 | Oas3       | 246727 | 2'-5' oligoadenylate synthetase 3                                     | 5.88 | 3.73 | 0.00 |
| A_52_P2540   | NM_001013 | Gm5662     | 435337 | predicted gene 5662                                                   | 4.83 | 3.72 | 0.00 |
| A_51_P104933 | NM_145520 | Trub2      | 227682 | TruB pseudouridine (psi) synthase homolog 2 (E. coli)                 | 6.38 | 3.72 | 0.00 |
| A_51_P391432 | NM_145449 | Ifi2712b   | 217845 | interferon, alpha-inducible protein 27 like 2B                        | 3.99 | 3.72 | 0.00 |
| A_52_P76216  | NM_001033 | Fam59a     | 381126 | family with sequence similarity 59, member A                          | 5.12 | 3.72 | 0.00 |
| A_51_P165060 | NM_011396 | Slc22a5    | 20520  | solute carrier family 22 (organic cation transporter), member 5       | 3.31 | 3.72 | 0.01 |
| A_52_P34979  | BC055805  | Epc1       | 13831  | enhancer of polycomb homolog 1 (Drosophila)                           | 3.60 | 3.72 | 0.01 |
| A_52_P144925 | NM_027261 | Taf1d      | 75316  | TATA box binding protein (Tbp)-associated factor, RNA polymerase I, D | 7.39 | 3.72 | 0.00 |
| A_52_P207173 | AK040662  | Serpine1   | 18787  | serine (or cysteine) peptidase inhibitor, clade E, member 1           | 3.62 | 3.71 | 0.01 |
| A_51_P172054 | NM_019521 | Gas6       | 14456  | growth arrest specific 6                                              | 4.48 | 3.71 | 0.00 |
| A_52_P320156 | AK088706  | E430024C03 | 319443 | RIKEN cDNA E430024C06 gene                                            | 3.57 | 3.71 | 0.01 |
| A_51_P277270 | NM_011252 | Rbmx       | 19655  | RNA binding motif protein, X chromosome                               | 3.73 | 3.71 | 0.01 |
| A_52_P577386 | NM_010531 | Il18bp     | 16068  | interleukin 18 binding protein                                        | 6.25 | 3.70 | 0.00 |
| A_51_P493886 | NM_173866 | Gpt2       | 108682 | glutamic pyruvate transaminase (alanine aminotransferase) 2           | 3.95 | 3.70 | 0.00 |
| A_52_P318673 | NM_009117 | Saa1       | 20208  | serum amyloid A 1                                                     | 3.42 | 3.69 | 0.01 |
| A_51_P462299 | NM_181732 | Aida       | 108909 | axon interactor, dorsalization associated                             | 4.09 | 3.69 | 0.00 |
| A_52_P589023 | NM_027123 | Fastkd3    | 69577  | FAST kinase domains 3                                                 | 7.00 | 3.69 | 0.00 |
| A_52_P585652 | NM_173182 | Fndc3b     | 72007  | fibronectin type III domain containing 3B                             | 4.34 | 3.69 | 0.00 |
| A_52_P73134  | NM_130796 | Snx18      | 170625 | sorting nexin 18                                                      | 4.61 | 3.69 | 0.00 |
| A_51_P428578 | NM_025459 | Fam134b    | 66270  | family with sequence similarity 134, member B                         | 5.36 | 3.69 | 0.00 |
| A_52_P502267 | NM_172663 | Epc2       | 227867 | enhancer of polycomb homolog 2 (Drosophila)                           | 3.27 | 3.69 | 0.01 |
| A_51_P114314 | AK017419  | 5530400B01 | 71434  | RIKEN cDNA 5530400B01 gene                                            | 3.75 | 3.68 | 0.00 |
| A_52_P851862 | AK080781  | NA         | NA     | NA                                                                    | 3.00 | 3.68 | 0.03 |
| A_52_P652094 | NM_022028 | Sav1       | 64010  | salvador homolog 1 (Drosophila)                                       | 4.28 | 3.66 | 0.00 |
| A_52_P137500 | AK046255  | Fam199x    | 245622 | family with sequence similarity 199, X-linked                         | 3.59 | 3.66 | 0.01 |
| A_51_P219505 | NM_177388 | Slc41a2    | 338365 | solute carrier family 41, member 2                                    | 3.77 | 3.66 | 0.00 |
| A_52_P924359 | NA        | NA         | NA     | NA                                                                    | 6.77 | 3.66 | 0.00 |

|              |           |           |        |                                                                                                      |      |      |      |
|--------------|-----------|-----------|--------|------------------------------------------------------------------------------------------------------|------|------|------|
| A_52_P624107 | BC094938  | Gm5039    | 266459 | eukaryotic translation initiation factor 1A pseudogene                                               | 5.54 | 3.66 | 0.00 |
| A_52_P292693 | NM_016690 | Hnrpdl    | 50926  | heterogeneous nuclear ribonucleoprotein D-like                                                       | 4.35 | 3.65 | 0.00 |
| A_51_P516861 | AK122234  | Rapgef5   | 217944 | Rap guanine nucleotide exchange factor (GEF) 5                                                       | 3.19 | 3.65 | 0.02 |
| A_51_P458262 | NM_011888 | Ccl19     | 24047  | chemokine (C-C motif) ligand 19                                                                      | 4.11 | 3.65 | 0.00 |
| A_52_P288873 | NM_029362 | Chmp4b    | 75608  | chromatin modifying protein 4B                                                                       | 6.06 | 3.64 | 0.00 |
| A_51_P265999 | NM_146238 | Gemin8    | 237221 | gem (nuclear organelle) associated protein 8                                                         | 6.12 | 3.64 | 0.00 |
| A_51_P508838 | NM_021342 | Kcne4     | 57814  | potassium voltage-gated channel, Isk-related subfamily, gene 4                                       | 3.76 | 3.63 | 0.00 |
| A_51_P164998 | NM_025285 | Stmn2     | 20257  | stathmin-like 2                                                                                      | 5.11 | 3.63 | 0.00 |
| A_52_P653054 | NA        | NA        | NA     | NA                                                                                                   | 2.86 | 3.63 | 0.05 |
| A_51_P464064 | NM_026083 | Zc3h13    | 67302  | zinc finger CCCH type containing 13                                                                  | 5.96 | 3.63 | 0.00 |
| A_51_P311038 | NM_001024 | Adamts15  | 235130 | a disintegrin-like and metallopeptidase (reprolysin type) with thrombospondin type 1 motif, 15       | 3.46 | 3.62 | 0.01 |
| A_52_P302108 | NM_153398 | Zbtb24    | 268294 | zinc finger and BTB domain containing 24                                                             | 5.22 | 3.62 | 0.00 |
| A_51_P325165 | NM_145636 | Il27      | 246779 | interleukin 27                                                                                       | 5.07 | 3.62 | 0.00 |
| A_51_P493467 | NM_145588 | Kif22     | 110033 | kinesin family member 22                                                                             | 3.88 | 3.62 | 0.00 |
| A_52_P563475 | NM_026160 | Map1lc3b  | 67443  | microtubule-associated protein 1 light chain 3 beta                                                  | 7.88 | 3.62 | 0.00 |
| A_52_P665675 | NM_013454 | Abca1     | 11303  | ATP-binding cassette, sub-family A (ABC1), member 1                                                  | 6.49 | 3.62 | 0.00 |
| A_52_P494354 | NM_027418 | Mapk6     | 50772  | mitogen-activated protein kinase 6                                                                   | 4.28 | 3.61 | 0.00 |
| A_52_P247086 | AK154692  | Rprd2     | 75137  | regulation of nuclear pre-mRNA domain containing 2                                                   | 2.90 | 3.61 | 0.04 |
| A_52_P218440 | NM_178098 | 4930486L2 | 214639 | RIKEN cDNA 4930486L24 gene                                                                           | 6.93 | 3.61 | 0.00 |
| A_52_P23308  | NM_027482 | 5730508B0 | 70617  | RIKEN cDNA 5730508B09 gene                                                                           | 2.90 | 3.61 | 0.04 |
| A_51_P453351 | NM_172266 | Lpgat1    | 226856 | lysophosphatidylglycerol acyltransferase 1 signaling lymphocytic activation molecule family member 1 | 8.33 | 3.60 | 0.00 |
| A_52_P550173 | NM_013730 | Slamf1    | 27218  | oxidative stress induced growth inhibitor family member 1                                            | 3.33 | 3.60 | 0.01 |
| A_52_P417825 | NM_145950 | Osgin2    | 209212 | oxidative stress induced growth inhibitor family member 2                                            | 3.89 | 3.60 | 0.00 |
| A_52_P357177 | NM_001005 | Mtus1     | 102103 | mitochondrial tumor suppressor 1                                                                     | 5.18 | 3.59 | 0.00 |
| A_51_P385258 | AF197127  | Miox      | 56727  | myo-inositol oxygenase                                                                               | 5.57 | 3.59 | 0.00 |

|               |           |                 |        |                                                                                  |      |      |      |
|---------------|-----------|-----------------|--------|----------------------------------------------------------------------------------|------|------|------|
| A_51_P384673  | NM_133807 | Lrrc59          | 98238  | leucine rich repeat containing 59                                                | 5.28 | 3.59 | 0.00 |
| A_52_P225898  | NM_008428 | Kcnj8           | 16523  | potassium inwardly-rectifying channel, subfamily J, member 8                     | 7.90 | 3.59 | 0.00 |
| A_51_P447835  | NM_013737 | Pla2g7          | 27226  | phospholipase A2, group VII (platelet-activating factor acetylhydrolase, plasma) | 3.80 | 3.58 | 0.00 |
| A_52_P208763  | NM_013654 | Ccl7            | 20306  | chemokine (C-C motif) ligand 7                                                   | 2.94 | 3.58 | 0.04 |
| A_52_P520495  | NM_011693 | Vcam1           | 22329  | vascular cell adhesion molecule 1                                                | 5.01 | 3.58 | 0.00 |
| A_52_P382914  | NM_011639 | Trip6           | 22051  | thyroid hormone receptor interactor 6                                            | 5.92 | 3.58 | 0.00 |
| A_52_P355139  | NM_001034 | Fam134b         | 66270  | family with sequence similarity 134, member B                                    | 5.23 | 3.57 | 0.00 |
| A_51_P240501  | NM_026358 | 4930583H167749  |        | RIKEN cDNA 4930583H14 gene                                                       | 2.79 | 3.57 | 0.05 |
| A_51_P118237  | NM_011361 | Sgk1            | 20393  | serum/glucocorticoid regulated kinase 1                                          | 2.86 | 3.57 | 0.05 |
| A_52_P326187  | XM_136331 | Gm4955          | 240921 | predicted gene 4955                                                              | 2.74 | 3.57 | 0.06 |
| A_52_P170486  | NM_028259 | Rps6kb1         | 72508  | ribosomal protein S6 kinase, polypeptide 1                                       | 5.34 | 3.56 | 0.00 |
| A_51_P126835  | NM_001025 | 2700007P2121772 |        | RIKEN cDNA 2700007P21 gene                                                       | 6.62 | 3.56 | 0.00 |
| A_52_P427064  | NM_145520 | Trub2           | 227682 | TruB pseudouridine (psi) synthase homolog 2 (E. coli)                            | 7.24 | 3.56 | 0.00 |
| A_51_P189151  | AK028396  | Kbtbd2          | 210973 | kelch repeat and BTB (POZ) domain containing 2                                   | 3.48 | 3.56 | 0.01 |
| A_51_P335480  | NM_028077 | 1810055G02056   |        | RIKEN cDNA 1810055G02 gene                                                       | 5.99 | 3.56 | 0.00 |
| A_51_P277884  | NM_010120 | Eif1a           | 13664  | eukaryotic translation initiation factor 1A                                      | 9.54 | 3.56 | 0.00 |
| A_52_P219943  | BC055805  | Epc1            | 13831  | enhancer of polycomb homolog 1 (Drosophila)                                      | 3.17 | 3.55 | 0.02 |
| A_52_P487686  | NM_001001 | BC117090        | 1E+08  | cDNA sequence BC117090                                                           | 3.74 | 3.55 | 0.01 |
| A_52_P348287  | NM_198104 | Tcte3           | 21647  | t-complex-associated testis expressed 3                                          | 5.09 | 3.54 | 0.00 |
| A_52_P1026777 | NM_001033 | Ecscr           | 68545  | endothelial cell-specific chemotaxis regulator                                   | 6.59 | 3.54 | 0.00 |
| A_52_P373893  | AK154578  | Acvr1b          | 11479  | activin A receptor, type 1B                                                      | 5.42 | 3.53 | 0.00 |
| A_52_P577384  | NM_010531 | Il18bp          | 16068  | interleukin 18 binding protein                                                   | 6.09 | 3.53 | 0.00 |
| A_52_P380369  | NM_199015 | D14Ertd66       | 219132 | DNA segment, Chr 14, ERATO Doi 668, expressed                                    | 4.92 | 3.53 | 0.00 |
| A_52_P669155  | AK170324  | Itgam           | 16409  | integrin alpha M                                                                 | 5.61 | 3.53 | 0.00 |
| A_51_P115575  | D13759    | Map3k8          | 26410  | mitogen-activated protein kinase kinase kinase 8                                 | 4.85 | 3.52 | 0.00 |
| A_52_P20765   | NM_134164 | Syt12           | 171180 | synaptotagmin XII                                                                | 7.43 | 3.52 | 0.00 |
| A_51_P166886  | NM_011314 | Saa2            | 20209  | serum amyloid A 2                                                                | 3.28 | 3.52 | 0.01 |
| A_52_P72237   | NM_009609 | Actg1           | 11465  | actin, gamma, cytoplasmic 1                                                      | 3.13 | 3.52 | 0.02 |
| A_51_P504991  | NM_181542 | Slfn10          | 237887 | schlafen 10                                                                      | 5.16 | 3.52 | 0.00 |
| A_51_P515623  | NM_026111 | Qpctl           | 67369  | glutaminy-peptide cyclotransferase-like                                          | 4.21 | 3.52 | 0.00 |
| A_52_P442567  | NM_009099 | Trim30          | 20128  | tripartite motif-containing 30                                                   | 3.36 | 3.52 | 0.01 |

|              |            |           |        |                                                                   |      |      |      |
|--------------|------------|-----------|--------|-------------------------------------------------------------------|------|------|------|
| A_52_P564908 | AK013903   | NA        | NA     | NA                                                                | 5.06 | 3.51 | 0.00 |
| A_52_P657123 | NA         | NA        | NA     | NA                                                                | 7.27 | 3.51 | 0.00 |
| A_51_P267239 | NM_019980  | Litaf     | 56722  | LPS-induced TN factor                                             | 5.27 | 3.51 | 0.00 |
| A_52_P527375 | AK154817   | 3110043O2 | 73205  | RIKEN cDNA 3110043O21 gene                                        | 4.80 | 3.51 | 0.00 |
| A_51_P173043 | NM_010118  | Egr2      | 13654  | early growth response 2                                           | 5.38 | 3.50 | 0.00 |
| A_52_P64514  | AK007221   | Herc5     | 67138  | hect domain and RLD 5                                             | 3.90 | 3.50 | 0.00 |
| A_52_P111031 | NM_001013  | Pcdh17    | 219228 | protocadherin 17                                                  | 6.24 | 3.50 | 0.00 |
| A_51_P435830 | NM_029212  | Ccdc33    | 382077 | coiled-coil domain containing 33                                  | 7.08 | 3.50 | 0.00 |
| A_52_P344978 | XR_003344  | NA        | NA     | NA                                                                | 4.84 | 3.50 | 0.00 |
| A_52_P623337 | NM_010880  | Ncl       | 17975  | nucleolin                                                         | 3.68 | 3.49 | 0.01 |
| A_52_P564663 | NA         | NA        | NA     | NA                                                                | 3.06 | 3.49 | 0.02 |
| A_52_P35174  | NM_011710  | Wars      | 22375  | tryptophanyl-tRNA synthetase                                      | 4.44 | 3.47 | 0.00 |
| A_51_P239203 | NM_011950  | Mapk13    | 26415  | mitogen-activated protein kinase 13                               | 4.60 | 3.46 | 0.00 |
| A_52_P108346 | NM_010849  | Myc       | 17869  | myelocytomatosis oncogene                                         | 4.95 | 3.46 | 0.00 |
| A_52_P15073  | NM_177101  | 4833442J1 | 320204 | RIKEN cDNA 4833442J19 gene                                        | 5.21 | 3.46 | 0.00 |
| A_51_P416295 | NM_019440  | Irgm2     | 54396  | immunity-related GTPase family M member 2                         | 2.85 | 3.46 | 0.05 |
| A_52_P663686 | AK077243   | I830012O1 | 667370 | RIKEN cDNA I830012O16 gene                                        | 3.18 | 3.46 | 0.02 |
| A_51_P488890 | NM_013632  | Pnp1      | 18950  | purine-nucleoside phosphorylase 1                                 | 3.35 | 3.46 | 0.01 |
| A_52_P359819 | NM_198190  | Ntf5      | 78405  | neurotrophin 5                                                    | 4.60 | 3.46 | 0.00 |
| A_52_P683306 | NM_146084  | Fam13b    | 225358 | family with sequence similarity 13, member B                      | 5.37 | 3.45 | 0.00 |
| A_52_P214630 | NM_011448  | Sox9      | 20682  | SRY-box containing gene 9                                         | 4.34 | 3.45 | 0.00 |
| A_51_P231597 | NM_172987  | Nkain3    | 269513 | Na <sup>+</sup> /K <sup>+</sup> transporting ATPase interacting 3 | 7.01 | 3.44 | 0.00 |
| A_52_P626796 | XM_0010067 | NA        | NA     | NA                                                                | 9.20 | 3.44 | 0.00 |
| A_51_P164667 | NM_008211  | H3f3b     | 15081  | H3 histone, family 3B                                             | 3.64 | 3.44 | 0.01 |
|              |            |           |        | TATA box binding protein (Tbp)-associated factor, RNA             |      |      |      |
| A_51_P306608 | NM_029248  | Taf1d     | 75316  | polymerase I, D                                                   | 5.28 | 3.44 | 0.00 |
| A_51_P482425 | NM_152815  | Lins2     | 72635  | lines homolog 2 (Drosophila)                                      | 5.58 | 3.44 | 0.00 |
|              |            |           |        | synaptotagmin binding, cytoplasmic RNA interacting                |      |      |      |
| A_51_P384469 | NM_019666  | Syncrip   | 56403  | protein                                                           | 5.97 | 3.44 | 0.00 |
| A_51_P141315 | XM_902782  | NA        | NA     | NA                                                                | 5.47 | 3.43 | 0.00 |
| A_51_P193000 | NM_175325  | Bbs4      | 102774 | Bardet-Biedl syndrome 4 (human)                                   | 3.84 | 3.43 | 0.00 |
| A_51_P132185 | NM_001001  | BC117090  | 1E+08  | cDNA sequence BC117090                                            | 6.20 | 3.43 | 0.00 |
| A_52_P653406 | NA         | NA        | NA     | NA                                                                | 3.45 | 3.43 | 0.01 |
| A_51_P263965 | NM_010442  | Hmox1     | 15368  | heme oxygenase (decycling) 1                                      | 5.52 | 3.40 | 0.00 |

|              |            |           |        |                                                                                                        |      |      |      |
|--------------|------------|-----------|--------|--------------------------------------------------------------------------------------------------------|------|------|------|
| A_51_P413088 | NA         | NA        | NA     | NA                                                                                                     | 3.34 | 3.40 | 0.01 |
| A_52_P83479  | NM_008329  | Ifi204    | 15951  | interferon activated gene 204                                                                          | 4.16 | 3.40 | 0.00 |
| A_52_P488361 | NM_028839  | Tmem110   | 69179  | transmembrane protein 110                                                                              | 5.79 | 3.39 | 0.00 |
| A_51_P411297 | NM_016714  | Nup50     | 18141  | nucleoporin 50                                                                                         | 6.30 | 3.38 | 0.00 |
| A_52_P213889 | NM_172476  | Tmc7      | 209760 | transmembrane channel-like gene family 7                                                               | 3.44 | 3.38 | 0.01 |
| A_51_P480209 | NM_007889  | Dvl3      | 13544  | dishevelled 3, dsh homolog (Drosophila)                                                                | 6.70 | 3.38 | 0.00 |
| A_52_P515336 | AK045877   | Atp6v0a1  | 11975  | ATPase, H+ transporting, lysosomal V0 subunit A1<br>engulfment and cell motility 3, ced-12 homolog (C. | 4.08 | 3.38 | 0.00 |
| A_51_P475948 | AK048129   | Elmo3     | 234683 | elegans)                                                                                               | 4.50 | 3.38 | 0.00 |
| A_51_P485828 | NM_007880  | Arid3a    | 13496  | AT rich interactive domain 3A (BRIGHT-like)                                                            | 5.39 | 3.38 | 0.00 |
| A_52_P186033 | NM_009259  | Spn       | 20737  | sialophorin                                                                                            | 6.96 | 3.38 | 0.00 |
| A_51_P193011 | NM_001025: | NA        | NA     | NA                                                                                                     | 8.35 | 3.37 | 0.00 |
| A_52_P319552 | XM_161350  | 1700024P1 | 242594 | RIKEN cDNA 1700024P16 gene                                                                             | 6.54 | 3.37 | 0.00 |
| A_51_P462192 | NM_138648  | Olr1      | 108078 | oxidized low density lipoprotein (lectin-like) receptor 1                                              | 7.39 | 3.37 | 0.00 |
| A_51_P284793 | NM_027927  | Ints12    | 71793  | integrator complex subunit 12                                                                          | 4.75 | 3.37 | 0.00 |
| A_51_P295192 | NM_010907  | Nfkbia    | 18035  | nuclear factor of kappa light polypeptide gene enhancer<br>in B-cells inhibitor, alpha                 | 3.90 | 3.36 | 0.00 |
| A_51_P110173 | NM_025454  | Ing5      | 66262  | inhibitor of growth family, member 5                                                                   | 2.94 | 3.36 | 0.04 |
| A_52_P384049 | NM_029512  | Ttpal     | 76080  | tocopherol (alpha) transfer protein-like                                                               | 4.76 | 3.36 | 0.00 |
| A_51_P268983 | XM_144099  | Myom3     | 242702 | myomesin family, member 3                                                                              | 3.41 | 3.36 | 0.01 |
| A_51_P370720 | NM_024290  | Tnfrsf23  | 79201  | tumor necrosis factor receptor superfamily, member 23                                                  | 5.71 | 3.36 | 0.00 |
| A_52_P679860 | AK147960   | Herc5     | 67138  | hect domain and RLD 5                                                                                  | 3.82 | 3.35 | 0.00 |
| A_52_P270035 | NM_029836  | Tspyl2    | 52808  | TSPY-like 2                                                                                            | 6.09 | 3.35 | 0.00 |
| A_51_P339943 | NM_010917  | Nid1      | 18073  | nidogen 1                                                                                              | 6.38 | 3.34 | 0.00 |
| A_51_P128526 | NM_011200  | Ptp4a1    | 19243  | protein tyrosine phosphatase 4a1                                                                       | 3.11 | 3.34 | 0.02 |
| A_52_P646663 | NA         | NA        | NA     | NA                                                                                                     | 5.22 | 3.34 | 0.00 |
| A_52_P176245 | NM_010258  | Gata6     | 14465  | GATA binding protein 6                                                                                 | 5.95 | 3.33 | 0.00 |
| A_52_P507214 | NM_013599  | Mmp9      | 17395  | matrix metalloproteinase 9                                                                             | 6.76 | 3.33 | 0.00 |
| A_51_P104418 | NM_022019  | Dusp10    | 63953  | dual specificity phosphatase 10                                                                        | 3.86 | 3.33 | 0.00 |
| A_51_P468742 | NM_025697  | 6330409NC | 66674  | RIKEN cDNA 6330409N04 gene                                                                             | 5.75 | 3.33 | 0.00 |
| A_51_P409694 | NM_019976  | Psrc1     | 56742  | proline/serine-rich coiled-coil 1                                                                      | 4.30 | 3.33 | 0.00 |
| A_52_P516097 | NM_175529  | Leng9     | 243813 | leukocyte receptor cluster (LRC) member 9                                                              | 5.47 | 3.33 | 0.00 |

|              |           |           |        |                                                                                               |       |      |      |
|--------------|-----------|-----------|--------|-----------------------------------------------------------------------------------------------|-------|------|------|
| A_51_P440238 | NM_027819 | Ggt6      | 71522  | gamma-glutamyltransferase 6                                                                   | 5.32  | 3.32 | 0.00 |
| A_51_P172573 | NM_013671 | Sod2      | 20656  | superoxide dismutase 2, mitochondrial                                                         | 9.22  | 3.32 | 0.00 |
| A_52_P407239 | NM_001077 | Pik3r1    | 18708  | phosphatidylinositol 3-kinase, regulatory subunit, polypeptide 1 (p85 alpha)                  | 3.53  | 3.32 | 0.01 |
| A_51_P281593 | AK144593  | Ppapdc1b  | 71910  | phosphatidic acid phosphatase type 2 domain containing 1B                                     | 3.22  | 3.31 | 0.02 |
| A_51_P490247 | NM_022004 | Fxyd6     | 59095  | FXD domain-containing ion transport regulator 6                                               | 3.77  | 3.31 | 0.00 |
| A_52_P384621 | NM_177725 | Lrrc8a    | 241296 | leucine rich repeat containing 8A                                                             | 3.35  | 3.31 | 0.01 |
| A_52_P499499 | NM_029021 | 4833422F2 | 74614  | RIKEN cDNA 4833422F24 gene                                                                    | 3.38  | 3.31 | 0.01 |
| A_51_P358765 | NM_009263 | Spp1      | 20750  | secreted phosphoprotein 1                                                                     | 5.38  | 3.31 | 0.00 |
| A_52_P425092 | NA        | NA        | NA     | NA                                                                                            | 6.70  | 3.30 | 0.00 |
| A_51_P331279 | NM_023142 | Arpc1b    | 11867  | actin related protein 2/3 complex, subunit 1B                                                 | 12.22 | 3.30 | 0.00 |
| A_52_P279658 | NM_009817 | Cast      | 12380  | calpastatin                                                                                   | 3.81  | 3.29 | 0.00 |
| A_51_P201480 | NM_213659 | Stat3     | 20848  | signal transducer and activator of transcription 3                                            | 4.47  | 3.29 | 0.00 |
| A_52_P618852 | AK139584  | Eif1a     | 13664  | eukaryotic translation initiation factor 1A                                                   | 6.17  | 3.29 | 0.00 |
| A_52_P188589 | NM_001007 | Gm447     | 242997 | predicted gene 447                                                                            | 4.04  | 3.29 | 0.00 |
| A_52_P578562 | NM_173865 | Slc41a1   | 98396  | solute carrier family 41, member 1                                                            | 4.42  | 3.28 | 0.00 |
| A_51_P208603 | NM_010050 | Dio2      | 13371  | deiodinase, iodothyronine, type II                                                            | 4.18  | 3.28 | 0.00 |
| A_51_P306731 | NM_172715 | Agpat9    | 231510 | 1-acylglycerol-3-phosphate O-acyltransferase 9                                                | 4.19  | 3.28 | 0.00 |
| A_51_P396752 | NM_024191 | Arl2bp    | 107566 | ADP-ribosylation factor-like 2 binding protein                                                | 4.10  | 3.28 | 0.00 |
| A_51_P444290 | NM_029084 | Slamf8    | 74748  | SLAM family member 8                                                                          | 3.21  | 3.27 | 0.02 |
| A_51_P116298 | AK006122  | Slc17a9   | 228993 | solute carrier family 17, member 9                                                            | 2.72  | 3.27 | 0.07 |
| A_52_P473813 | NA        | NA        | NA     | NA                                                                                            | 3.93  | 3.27 | 0.00 |
| A_51_P152845 | NM_145076 | Trim24    | 21848  | tripartite motif-containing 24                                                                | 6.15  | 3.26 | 0.00 |
| A_51_P186531 | NM_025289 | Tbfg1     | 21376  | transforming growth factor beta regulated gene 1                                              | 4.49  | 3.26 | 0.00 |
| A_52_P213932 | NM_009621 | Adamts1   | 11504  | a disintegrin-like and metallopeptidase (reprolysin type) with thrombospondin type 1 motif, 1 | 5.79  | 3.26 | 0.00 |
| A_51_P279437 | NM_029662 | Mfsd2a    | 76574  | major facilitator superfamily domain containing 2A                                            | 2.74  | 3.25 | 0.07 |
| A_51_P211600 | AK028475  | 11-Sep    | 52398  | septin 11                                                                                     | 4.14  | 3.25 | 0.00 |
| A_52_P668478 | NM_146002 | Rhbdd2    | 215160 | rhomboid domain containing 2                                                                  | 4.31  | 3.25 | 0.00 |
| A_52_P451888 | NM_011903 | Tlk2      | 24086  | tousled-like kinase 2 (Arabidopsis)                                                           | 3.26  | 3.24 | 0.01 |
| A_51_P415247 | NA        | NA        | NA     | NA                                                                                            | 4.93  | 3.24 | 0.00 |

|              |           |         |        |                                                                                 |      |      |      |
|--------------|-----------|---------|--------|---------------------------------------------------------------------------------|------|------|------|
| A_51_P436796 | NM_016784 | Plrg1   | 53317  | pleiotropic regulator 1, PRL1 homolog (Arabidopsis)                             | 5.38 | 3.23 | 0.00 |
| A_51_P490296 | NM_177472 | Btbd12  | 52864  | BTB (POZ) domain containing 12                                                  | 6.43 | 3.23 | 0.00 |
| A_52_P154710 | AK170547  | Sesn2   | 230784 | sestrin 2                                                                       | 5.25 | 3.23 | 0.00 |
| A_51_P367434 | NM_028876 | Tmed5   | 73130  | transmembrane emp24 protein transport domain containing 5                       | 4.64 | 3.23 | 0.00 |
| A_52_P218058 | NM_001038 | Clec5a  | 23845  | C-type lectin domain family 5, member a                                         | 6.66 | 3.23 | 0.00 |
| A_51_P337935 | AK008024  | Slc7a15 | 328059 | solute carrier family 7 (cationic amino acid transporter, y+ system), member 15 | 6.90 | 3.23 | 0.00 |
| A_51_P297679 | NM_008225 | Hcls1   | 15163  | hematopoietic cell specific Lyn substrate 1                                     | 6.55 | 3.23 | 0.00 |
| A_52_P112110 | NM_145987 | Tmem82  | 213989 | transmembrane protein 82                                                        | 6.21 | 3.22 | 0.00 |
| A_51_P219483 | NM_001024 | Tsku    | 244152 | tsukushin                                                                       | 4.70 | 3.21 | 0.00 |
| A_52_P826021 | NM_020283 | B3galt1 | 26877  | UDP-Gal:betaGlcNAc beta 1,3-galactosyltransferase, polypeptide 1                | 4.41 | 3.21 | 0.00 |
| A_52_P77332  | NM_022655 | Ireb2   | 64602  | iron responsive element binding protein 2                                       | 4.02 | 3.21 | 0.00 |
| A_52_P604629 | NM_153287 | Csrnp1  | 215418 | cysteine-serine-rich nuclear protein 1                                          | 3.99 | 3.21 | 0.00 |
| A_51_P469449 | NM_001040 | Ung     | 22256  | uracil DNA glycosylase                                                          | 5.60 | 3.20 | 0.00 |
| A_52_P217211 | NM_018820 | Sertad1 | 55942  | SERTA domain containing 1                                                       | 5.46 | 3.20 | 0.00 |
| A_52_P643851 | NR_001277 | Snord33 | 27208  | small nucleolar RNA, C/D box 33                                                 | 4.81 | 3.20 | 0.00 |
| A_52_P317730 | NA        | NA      | NA     | NA                                                                              | 4.68 | 3.20 | 0.00 |
| A_52_P199019 | NM_001013 | Trim6   | 94088  | tripartite motif-containing 6                                                   | 4.64 | 3.19 | 0.00 |
| A_51_P451966 | XM_890177 | NA      | NA     | NA                                                                              | 4.37 | 3.19 | 0.00 |
| A_51_P262699 | NA        | NA      | NA     | NA                                                                              | 7.83 | 3.19 | 0.00 |
| A_51_P417701 | NM_001042 | Apaf1   | 11783  | apoptotic peptidase activating factor 1                                         | 4.78 | 3.19 | 0.00 |
| A_52_P395083 | AK156874  | NA      | NA     | NA                                                                              | 4.34 | 3.19 | 0.00 |
| A_52_P306327 | AK050118  | Igf1    | 16000  | insulin-like growth factor 1                                                    | 2.87 | 3.18 | 0.04 |
| A_52_P101142 | NM_018880 | Trim3   | 55992  | tripartite motif-containing 3                                                   | 5.61 | 3.18 | 0.00 |
| A_52_P525307 | BC031426  | NA      | NA     | NA                                                                              | 3.87 | 3.18 | 0.00 |
| A_51_P103819 | NM_144551 | Trib2   | 217410 | tribbles homolog 2 (Drosophila)                                                 | 4.34 | 3.17 | 0.00 |
| A_51_P383140 | NM_009289 | Slk     | 20874  | STE20-like kinase (yeast)                                                       | 4.48 | 3.17 | 0.00 |
| A_51_P275454 | NM_009099 | Trim30  | 20128  | tripartite motif-containing 30                                                  | 3.80 | 3.17 | 0.00 |
| A_52_P940978 | W15861    | NA      | NA     | NA                                                                              | 6.18 | 3.17 | 0.00 |
| A_51_P309307 | NA        | NA      | NA     | NA                                                                              | 2.99 | 3.16 | 0.03 |
| A_51_P266683 | NM_010107 | Efna1   | 13636  | ephrin A1                                                                       | 3.87 | 3.16 | 0.00 |

|               |           |                 |        |                                                                                                                       |      |      |      |
|---------------|-----------|-----------------|--------|-----------------------------------------------------------------------------------------------------------------------|------|------|------|
| A_51_P139651  | NM_008713 | Nos3            | 18127  | nitric oxide synthase 3, endothelial cell                                                                             | 3.66 | 3.16 | 0.01 |
| A_52_P284203  | XR_004371 | NA              | NA     | NA                                                                                                                    | 5.02 | 3.15 | 0.00 |
| A_52_P232813  | NM_203320 | Cxcl3           | 330122 | chemokine (C-X-C motif) ligand 3                                                                                      | 3.59 | 3.15 | 0.01 |
| A_52_P609153  | NM_144905 | 6330416G1230279 |        | RIKEN cDNA 6330416G13 gene                                                                                            | 5.22 | 3.15 | 0.00 |
| A_51_P479818  | NM_028894 | Lonrf3          | 74365  | LON peptidase N-terminal domain and ring finger 3                                                                     | 3.26 | 3.15 | 0.01 |
| A_52_P601727  | AK052688  | Cfh             | 12628  | complement component factor h                                                                                         | 4.00 | 3.15 | 0.00 |
| A_51_P169850  | NM_019786 | Tbk1            | 56480  | TANK-binding kinase 1                                                                                                 | 3.85 | 3.15 | 0.00 |
| A_51_P418168  | NM_029103 | Manf            | 74840  | mesencephalic astrocyte-derived neurotrophic factor                                                                   | 4.00 | 3.14 | 0.00 |
| A_51_P490397  | NM_133692 | Pold3           | 67967  | polymerase (DNA-directed), delta 3, accessory subunit<br>glycerophosphocholine phosphodiesterase GDE1                 | 5.06 | 3.14 | 0.00 |
| A_51_P464791  | NM_001042 | Gpcpd1          | 74182  | homolog (S. cerevisiae)                                                                                               | 2.94 | 3.13 | 0.04 |
| A_52_P1115511 | AK031392  | 6030422H2402765 |        | RIKEN cDNA 6030422H21 gene                                                                                            | 3.77 | 3.13 | 0.00 |
| A_52_P513177  | NM_001029 | Sla             | 20491  | src-like adaptor                                                                                                      | 5.17 | 3.13 | 0.00 |
| A_51_P131335  | NM_153568 | Lrrc66          | 231296 | leucine rich repeat containing 66                                                                                     | 9.21 | 3.13 | 0.00 |
| A_52_P532029  | NM_019786 | Tbk1            | 56480  | TANK-binding kinase 1                                                                                                 | 4.02 | 3.13 | 0.00 |
| A_51_P515348  | NM_133757 | Pgs1            | 74451  | phosphatidylglycerophosphate synthase 1                                                                               | 5.26 | 3.12 | 0.00 |
| A_52_P634250  | NM_010706 | Lgals4          | 16855  | lectin, galactose binding, soluble 4                                                                                  | 3.25 | 3.12 | 0.01 |
| A_52_P135572  | BC043710  | Dopey1          | 320615 | dopey family member 1                                                                                                 | 4.18 | 3.12 | 0.00 |
| A_51_P138598  | NM_028839 | Tmem110         | 69179  | transmembrane protein 110                                                                                             | 6.74 | 3.12 | 0.00 |
| A_51_P302503  | NM_008654 | Ppp1r15a        | 17872  | protein phosphatase 1, regulatory (inhibitor) subunit<br>15A<br>TATA box binding protein (Tbp)-associated factor, RNA | 2.93 | 3.11 | 0.04 |
| A_52_P470916  | AK161656  | Taf1d           | 75316  | polymerase I, D                                                                                                       | 5.10 | 3.11 | 0.00 |
| A_51_P304500  | NM_001025 | Tapbp           | 21356  | TAP binding protein                                                                                                   | 5.16 | 3.11 | 0.00 |
| A_52_P646602  | NM_027815 | 9030624J071517  |        | RIKEN cDNA 9030624J02 gene                                                                                            | 5.45 | 3.11 | 0.00 |
| A_51_P511102  | NM_030249 | Cttnbp2nl       | 80281  | CTTNBP2 N-terminal like                                                                                               | 5.65 | 3.11 | 0.00 |
| A_51_P266928  | NM_172514 | Tmem71          | 213068 | transmembrane protein 71                                                                                              | 5.92 | 3.11 | 0.00 |
| A_52_P650387  | NM_001045 | Ccnj1           | 380694 | cyclin J-like                                                                                                         | 4.50 | 3.10 | 0.00 |
| A_51_P483180  | AK170966  | Snx7            | 76561  | sorting nexin 7                                                                                                       | 5.63 | 3.10 | 0.00 |
| A_51_P293781  | NM_016863 | Fkbp1b          | 14226  | FK506 binding protein 1b                                                                                              | 3.19 | 3.10 | 0.02 |
| A_51_P187253  | NM_008320 | Irf8            | 15900  | interferon regulatory factor 8                                                                                        | 3.61 | 3.10 | 0.01 |



|              |           |            |        |                                                                                                   |      |      |      |
|--------------|-----------|------------|--------|---------------------------------------------------------------------------------------------------|------|------|------|
| A_52_P236072 | NM_008636 | Mtf1       | 17764  | metal response element binding transcription factor 1                                             | 4.41 | 3.10 | 0.00 |
| A_52_P325797 | NA        | NA         | NA     | NA                                                                                                | 6.27 | 3.09 | 0.00 |
| A_52_P665436 | NM_024181 | Dnajc10    | 66861  | Dnaj (Hsp40) homolog, subfamily C, member 10                                                      | 3.67 | 3.09 | 0.01 |
| A_51_P187579 | M17518    | NA         | NA     | NA                                                                                                | 6.50 | 3.09 | 0.00 |
| A_51_P449171 | NM_007464 | Birc3      | 11796  | baculoviral IAP repeat-containing 3                                                               | 4.59 | 3.09 | 0.00 |
| A_52_P587738 | NM_008773 | P2ry2      | 18442  | purinergic receptor P2Y, G-protein coupled 2                                                      | 4.61 | 3.09 | 0.00 |
| A_52_P617386 | AK145781  | 4632427E1  | 666737 | RIKEN cDNA 4632427E13 gene                                                                        | 3.60 | 3.08 | 0.01 |
| A_51_P281089 | NM_011313 | S100a6     | 20200  | S100 calcium binding protein A6 (calcyclin)                                                       | 4.56 | 3.08 | 0.00 |
| A_52_P641597 | NM_145931 | Zc3h7a     | 106205 | zinc finger CCCH type containing 7 A                                                              | 4.15 | 3.08 | 0.00 |
| A_51_P200277 | NM_023475 | Serhl      | 68607  | serine hydrolase-like                                                                             | 7.72 | 3.08 | 0.00 |
| A_52_P365434 | BC051182  | D5Erttd579 | 320661 | DNA segment, Chr 5, ERATO Doi 579, expressed                                                      | 6.02 | 3.08 | 0.00 |
| A_51_P376445 | NM_008818 | Rhox5      | 18617  | reproductive homeobox 5                                                                           | 4.70 | 3.07 | 0.00 |
| A_51_P396854 | NM_019502 | Fxc1       | 14356  | fractured callus expressed transcript 1                                                           | 4.05 | 3.07 | 0.00 |
| A_52_P242888 | BC071265  | Ddx50      | 94213  | DEAD (Asp-Glu-Ala-Asp) box polypeptide 50                                                         | 4.81 | 3.07 | 0.00 |
| A_52_P392674 | NM_019736 | Acot9      | 56360  | acyl-CoA thioesterase 9                                                                           | 4.98 | 3.07 | 0.00 |
| A_52_P509710 | NM_025635 | Zwint      | 52696  | ZW10 interactor                                                                                   | 4.60 | 3.07 | 0.00 |
| A_52_P465454 | AK162362  | D10Erttd64 | 52717  | DNA segment, Chr 10, ERATO Doi 641, expressed                                                     | 9.73 | 3.07 | 0.00 |
| A_52_P231041 | NM_178119 | Agap1      | 347722 | ArfGAP with GTPase domain, ankyrin repeat and PH domain 1                                         | 3.40 | 3.07 | 0.01 |
| A_51_P484289 | NM_178798 | Slc7a6     | 330836 | solute carrier family 7 (cationic amino acid transporter, y+ system), member 6                    | 8.53 | 3.06 | 0.00 |
| A_52_P184149 | NM_008638 | Mthfd2     | 17768  | methylenetetrahydrofolate dehydrogenase (NAD+ dependent), methenyltetrahydrofolate cyclohydrolase | 6.91 | 3.06 | 0.00 |
| A_51_P340200 | NM_011816 | G3bp2      | 23881  | GTPase activating protein (SH3 domain) binding protein 2                                          | 3.96 | 3.06 | 0.00 |
| A_51_P378903 | NM_146981 | Olfr1260   | 258983 | olfactory receptor 1260                                                                           | 3.83 | 3.06 | 0.00 |
| A_52_P666646 | NM_178682 | 4933426M   | 217684 | RIKEN cDNA 4933426M11 gene                                                                        | 5.04 | 3.06 | 0.00 |
| A_52_P636830 | NM_011816 | G3bp2      | 23881  | GTPase activating protein (SH3 domain) binding protein 2                                          | 4.48 | 3.06 | 0.00 |
| A_52_P114282 | NM_001009 | Armcx5     | 494468 | armadillo repeat containing, X-linked 5                                                           | 4.63 | 3.06 | 0.00 |
| A_51_P448325 | NM_027102 | Esam       | 69524  | endothelial cell-specific adhesion molecule                                                       | 6.25 | 3.05 | 0.00 |
| A_52_P531140 | NM_010416 | Hemt1      | 15202  | hematopoietic cell transcript 1                                                                   | 3.15 | 3.05 | 0.02 |

|               |           |           |        |                                                                                            |      |      |      |
|---------------|-----------|-----------|--------|--------------------------------------------------------------------------------------------|------|------|------|
| A_52_P1193423 | XM_148801 | Prr22     | 224908 | proline rich 22                                                                            | 5.04 | 3.05 | 0.00 |
| A_52_P77983   | NM_009551 | Zfand5    | 22682  | zinc finger, AN1-type domain 5                                                             | 2.82 | 3.05 | 0.05 |
| A_51_P318410  | AK029097  | AI848100  | 226551 | expressed sequence AI848100                                                                | 3.93 | 3.05 | 0.00 |
| A_51_P259214  | NM_139143 | Slc39a6   | 106957 | solute carrier family 39 (metal ion transporter), member 6                                 | 6.44 | 3.05 | 0.00 |
| A_52_P308875  | AK049998  | Apobec3   | 80287  | apolipoprotein B mRNA editing enzyme, catalytic polypeptide 3                              | 4.24 | 3.04 | 0.00 |
| A_51_P395098  | NM_022310 | Hspa5     | 14828  | heat shock protein 5                                                                       | 5.48 | 3.04 | 0.00 |
| A_51_P320377  | NM_001039 | Gtf2a2    | 235459 | general transcription factor II A, 2                                                       | 7.67 | 3.04 | 0.00 |
| A_52_P656659  | NM_011396 | Slc22a5   | 20520  | solute carrier family 22 (organic cation transporter), member 5                            | 4.24 | 3.04 | 0.00 |
| A_52_P31814   | CB575847  | 1110038B1 | 68763  | RIKEN cDNA 1110038B12 gene                                                                 | 6.73 | 3.03 | 0.00 |
| A_52_P543016  | NM_021415 | Cacna1h   | 58226  | calcium channel, voltage-dependent, T type, alpha 1H subunit                               | 5.94 | 3.03 | 0.00 |
| A_51_P411296  | NM_016714 | Nup50     | 18141  | nucleoporin 50                                                                             | 4.97 | 3.03 | 0.00 |
| A_52_P174525  | BC043337  | Epb4.1    | 269587 | erythrocyte protein band 4.1                                                               | 5.71 | 3.02 | 0.00 |
| A_51_P472901  | NM_008577 | Slc3a2    | 17254  | solute carrier family 3 (activators of dibasic and neutral amino acid transport), member 2 | 6.68 | 3.02 | 0.00 |
| A_51_P129787  | NM_025793 | Wdr45l    | 66840  | Wdr45 like                                                                                 | 6.35 | 3.02 | 0.00 |
| A_51_P436878  | NM_018820 | Sertad1   | 55942  | SERTA domain containing 1                                                                  | 5.40 | 3.02 | 0.00 |
| A_52_P175852  | NA        | NA        | NA     | NA                                                                                         | 5.05 | 3.02 | 0.00 |
| A_52_P156158  | NM_024478 | Grpel1    | 17713  | GrpE-like 1, mitochondrial                                                                 | 2.81 | 3.01 | 0.05 |
| A_51_P161612  | NM_009831 | Ccng1     | 12450  | cyclin G1                                                                                  | 4.97 | 3.01 | 0.00 |
| A_51_P179565  | AK002502  | 2010204K1 | 68355  | RIKEN cDNA 2010204K13 gene                                                                 | 3.48 | 3.01 | 0.01 |
| A_51_P454726  | NM_001039 | Gtf2a2    | 235459 | general transcription factor II A, 2                                                       | 7.14 | 3.01 | 0.00 |
| A_51_P254471  | NM_007465 | Birc2     | 11797  | baculoviral IAP repeat-containing 2                                                        | 4.63 | 3.01 | 0.00 |
| A_51_P354804  | NM_080643 | Caskin2   | 140721 | CASK-interacting protein 2                                                                 | 6.80 | 3.00 | 0.00 |
| A_51_P229403  | NM_027339 | 2210415F1 | 70163  | RIKEN cDNA 2210415F13 gene                                                                 | 2.81 | 3.00 | 0.05 |
| A_52_P454765  | NM_172286 | 6430548M1 | 234797 | RIKEN cDNA 6430548M08 gene                                                                 | 5.07 | 3.00 | 0.00 |
| A_52_P481493  | NM_010220 | Fkbp5     | 14229  | FK506 binding protein 5                                                                    | 4.47 | 3.00 | 0.00 |
| A_51_P333253  | NM_178440 | Myo1g     | 246177 | myosin IG                                                                                  | 6.28 | 3.00 | 0.00 |
| A_52_P93933   | NM_008562 | Mcl1      | 17210  | myeloid cell leukemia sequence 1                                                           | 3.99 | 3.00 | 0.00 |
| A_52_P134639  | NM_009444 | Tgoln2    | 22135  | trans-golgi network protein 2                                                              | 5.17 | 3.00 | 0.00 |

|              |           |           |         |                                                         |      |      |      |
|--------------|-----------|-----------|---------|---------------------------------------------------------|------|------|------|
| A_51_P241705 | NM_011201 | Ptpn1     | 19246   | protein tyrosine phosphatase, non-receptor type 1       | 7.48 | 3.00 | 0.00 |
| A_51_P277263 | AK083899  | Rbmx      | 19655   | RNA binding motif protein, X chromosome                 | 4.72 | 2.99 | 0.00 |
| A_52_P398989 | NM_139200 | Cytip     | 227929  | cytohesin 1 interacting protein                         | 2.98 | 2.99 | 0.03 |
| A_52_P100293 | AK005549  | 493052611 | 75135   | RIKEN cDNA 4930526115 gene                              | 5.68 | 2.99 | 0.00 |
| A_51_P251256 | NM_009195 | Slc12a4   | 20498   | solute carrier family 12, member 4                      | 6.03 | 2.99 | 0.00 |
| A_52_P35057  | XM_900689 | NA        | NA      | NA                                                      | 5.52 | 2.98 | 0.00 |
| A_51_P451374 | NM_153405 | Rbm45     | 241490  | RNA binding motif protein 45                            | 3.42 | 2.98 | 0.01 |
| A_51_P222936 | AK080318  | Fmn12     | 71409   | formin-like 2                                           | 6.23 | 2.98 | 0.00 |
| A_51_P297858 | NM_172840 | Vwa2      | 240675  | von Willebrand factor A domain containing 2             | 6.01 | 2.98 | 0.00 |
| A_51_P268673 | AK008737  | 2210016H1 | 70125   | RIKEN cDNA 2210016H18 gene                              | 3.53 | 2.98 | 0.01 |
| A_52_P50216  | NM_146043 | Spin1     | 20729   | spindlin 1                                              | 7.15 | 2.98 | 0.00 |
| A_52_P739394 | AK040901  | A530041M  | 399576  | RIKEN cDNA A530041M06 gene                              | 4.35 | 2.98 | 0.00 |
| A_51_P456753 | NM_009747 | Bdkrb2    | 12062   | bradykinin receptor, beta 2                             | 5.36 | 2.98 | 0.00 |
|              |           |           |         | leukocyte immunoglobulin-like receptor, subfamily B     |      |      |      |
| A_51_P445728 | NM_011095 | Lilrb3    | 18733   | (with TM and ITIM domains), member 3                    | 5.36 | 2.98 | 0.00 |
| A_51_P151516 | AK045519  | B230208H1 | 1320273 | RIKEN cDNA B230208H11 gene                              | 3.96 | 2.98 | 0.00 |
| A_51_P343350 | NM_033603 | Amn       | 93835   | amionless                                               | 7.77 | 2.97 | 0.00 |
| A_52_P443705 | NM_026531 | Aen       | 68048   | apoptosis enhancing nuclease                            | 6.78 | 2.97 | 0.00 |
| A_51_P374651 | BC065123  | Baz1a     | 217578  | bromodomain adjacent to zinc finger domain 1A           | 4.57 | 2.97 | 0.00 |
| A_52_P312904 | AK161527  | Pcbp2     | 18521   | poly(rC) binding protein 2                              | 4.18 | 2.97 | 0.00 |
| A_52_P353905 | NA        | NA        | NA      | NA                                                      | 6.82 | 2.97 | 0.00 |
| A_52_P158800 | NM_010207 | Fgfr2     | 14183   | fibroblast growth factor receptor 2                     | 3.53 | 2.97 | 0.01 |
| A_51_P359636 | NM_011150 | Lgals3bp  | 19039   | lectin, galactoside-binding, soluble, 3 binding protein | 8.09 | 2.97 | 0.00 |
| A_52_P330314 | AK033097  | Lmo4      | 16911   | LIM domain only 4                                       | 3.08 | 2.96 | 0.02 |
| A_51_P334785 | NM_175026 | Pyhin1    | 236312  | pyrin and HIN domain family, member 1                   | 3.73 | 2.96 | 0.01 |
| A_51_P262701 | NM_019775 | Cpb2      | 56373   | carboxypeptidase B2 (plasma)                            | 8.41 | 2.95 | 0.00 |
| A_51_P268843 | NM_028544 | Rasip1    | 69903   | Ras interacting protein 1                               | 9.87 | 2.95 | 0.00 |
| A_51_P330133 | NM_025682 | Pspc1     | 66645   | paraspeckle protein 1                                   | 4.10 | 2.95 | 0.00 |
| A_52_P149864 | NM_016957 | Hmgn2     | 15331   | high mobility group nucleosomal binding domain 2        | 3.32 | 2.94 | 0.01 |
| A_51_P114616 | NM_016767 | Batf      | 53314   | basic leucine zipper transcription factor, ATF-like     | 6.02 | 2.94 | 0.00 |

|               |            |           |        |                                                                                              |      |      |      |
|---------------|------------|-----------|--------|----------------------------------------------------------------------------------------------|------|------|------|
| A_51_P137018  | XM_0010025 | NA        | NA     | NA                                                                                           | 7.13 | 2.94 | 0.00 |
| A_51_P501858  | NM_148927  | Plekha4   | 69217  | pleckstrin homology domain containing, family A (phosphoinositide binding specific) member 4 | 4.22 | 2.94 | 0.00 |
| A_52_P607230  | NM_010740  | Cd93      | 17064  | CD93 antigen                                                                                 | 8.56 | 2.94 | 0.00 |
| A_51_P177744  | NM_028864  | Zc3hav1   | 78781  | zinc finger CCCH type, antiviral 1                                                           | 2.79 | 2.94 | 0.05 |
| A_51_P191893  | AK163489   | 2410022M  | 69755  | RIKEN cDNA 2410022M11 gene                                                                   | 4.60 | 2.94 | 0.00 |
| A_51_P413348  | NM_009510  | Ezr       | 22350  | ezrin                                                                                        | 4.66 | 2.93 | 0.00 |
| A_52_P214804  | NM_016784  | Plrg1     | 53317  | pleiotropic regulator 1, PRL1 homolog (Arabidopsis)                                          | 6.52 | 2.93 | 0.00 |
| A_51_P166762  | NM_011192  | Psme3     | 19192  | proteasome (prosome, macropain) 28 subunit, 3                                                | 7.19 | 2.93 | 0.00 |
| A_52_P129354  | NM_175325  | Bbs4      | 102774 | Bardet-Biedl syndrome 4 (human)                                                              | 3.41 | 2.93 | 0.01 |
| A_51_P293753  | NM_025611  | Cul7      | 66515  | cullin 7                                                                                     | 2.98 | 2.93 | 0.03 |
| A_52_P139727  | NM_009716  | Atf4      | 11911  | activating transcription factor 4                                                            | 4.00 | 2.93 | 0.00 |
| A_52_P947847  | AK041062   | Gm4951    | 240327 | predicted gene 4951                                                                          | 3.33 | 2.92 | 0.01 |
| A_51_P375201  | NM_013807  | Plk3      | 12795  | polo-like kinase 3 (Drosophila)                                                              | 3.46 | 2.92 | 0.01 |
| A_52_P109304  | NM_013763  | Tbl2      | 27368  | transducin (beta)-like 2                                                                     | 8.86 | 2.92 | 0.00 |
| A_52_P394767  | NM_173761  | Ythdf1    | 228994 | YTH domain family 1                                                                          | 3.34 | 2.92 | 0.01 |
| A_51_P487384  | NM_029564  | Tax1bp3   | 76281  | Tax1 (human T-cell leukemia virus type I) binding protein 3                                  | 8.05 | 2.92 | 0.00 |
| A_51_P118132  | NM_011386  | Skil      | 20482  | SKI-like                                                                                     | 9.29 | 2.92 | 0.00 |
| A_51_P225592  | NM_001001  | Tpm4      | 326618 | tropomyosin 4                                                                                | 4.69 | 2.92 | 0.00 |
| A_51_P469817  | AK163070   | A630052E0 | 320726 | RIKEN cDNA A630052E07 gene                                                                   | 3.62 | 2.91 | 0.01 |
| A_51_P310040  | NM_144904  | Rod1      | 230257 | ROD1 regulator of differentiation 1 (S. pombe)                                               | 6.37 | 2.91 | 0.00 |
| A_51_P272563  | NM_172722  | Naa25     | 231713 | N(alpha)-acetyltransferase 25, NatB auxiliary subunit                                        | 5.31 | 2.91 | 0.00 |
| A_52_P579441  | NM_001045  | Morc3     | 338467 | microrchidia 3                                                                               | 5.23 | 2.91 | 0.00 |
| A_52_P686344  | NM_001014  | Ttll4     | 67534  | tubulin tyrosine ligase-like family, member 4                                                | 4.65 | 2.91 | 0.00 |
| A_51_P209280  | NM_133685  | Rab31     | 106572 | RAB31, member RAS oncogene family                                                            | 5.28 | 2.90 | 0.00 |
| A_52_P248403  | NA         | NA        | NA     | NA                                                                                           | 3.09 | 2.90 | 0.02 |
| A_52_P1083556 | AK032841   | NA        | NA     | NA                                                                                           | 2.86 | 2.90 | 0.05 |
| A_51_P163261  | NA         | NA        | NA     | NA                                                                                           | 5.73 | 2.90 | 0.00 |
| A_52_P128612  | NA         | NA        | NA     | NA                                                                                           | 6.13 | 2.90 | 0.00 |
| A_51_P422300  | NM_027209  | Ms4a6b    | 69774  | membrane-spanning 4-domains, subfamily A, member 6B                                          | 4.41 | 2.90 | 0.00 |

|              |           |           |        |                                                                                                       |      |      |      |
|--------------|-----------|-----------|--------|-------------------------------------------------------------------------------------------------------|------|------|------|
| A_51_P444015 | NA        | NA        | NA     | NA                                                                                                    | 4.92 | 2.90 | 0.00 |
| A_51_P118225 | NM_028078 | Igsf5     | 72058  | immunoglobulin superfamily, member 5                                                                  | 3.03 | 2.90 | 0.03 |
| A_51_P160907 | NM_001045 | Morc3     | 338467 | microrchidia 3                                                                                        | 5.40 | 2.89 | 0.00 |
| A_52_P214966 | NM_177730 | Impad1    | 242291 | inositol monophosphatase domain containing 1<br>CLP1, cleavage and polyadenylation factor I subunit,  | 4.42 | 2.89 | 0.00 |
| A_51_P407193 | NM_133840 | Clp1      | 98985  | homolog ( <i>S. cerevisiae</i> )                                                                      | 5.28 | 2.89 | 0.00 |
| A_51_P258372 | NM_030691 | Igsf6     | 80719  | immunoglobulin superfamily, member 6                                                                  | 4.12 | 2.89 | 0.00 |
| A_51_P199671 | NM_172472 | Tcfe3     | 209446 | transcription factor E3<br>a disintegrin and metallopeptidase domain 9 (meltrin                       | 3.93 | 2.89 | 0.00 |
| A_51_P518378 | NM_007404 | Adam9     | 11502  | gamma)                                                                                                | 6.09 | 2.89 | 0.00 |
| A_51_P131168 | NM_001012 | Ccdc55    | 237859 | coiled-coil domain containing 55                                                                      | 5.85 | 2.88 | 0.00 |
| A_52_P15658  | NA        | NA        | NA     | NA                                                                                                    | 6.67 | 2.88 | 0.00 |
| A_52_P653719 | NM_009005 | Rab7      | 19349  | RAB7, member RAS oncogene family                                                                      | 5.59 | 2.88 | 0.00 |
| A_52_P247788 | NM_172625 | Ino80c    | 225280 | INO80 complex subunit C                                                                               | 4.92 | 2.88 | 0.00 |
| A_51_P279505 | NM_019743 | Rybp      | 56353  | RING1 and YY1 binding protein                                                                         | 2.99 | 2.88 | 0.03 |
| A_52_P311999 | BC059060  | Gm3893    | 1E+08  | predicted gene 3893                                                                                   | 3.96 | 2.88 | 0.00 |
| A_52_P344160 | NM_182995 | 6330503K2 | 101565 | RIKEN cDNA 6330503K22 gene                                                                            | 5.78 | 2.88 | 0.00 |
| A_51_P316816 | NM_023738 | Uba7      | 74153  | ubiquitin-like modifier activating enzyme 7<br>solute carrier family 22 (organic cation transporter), | 2.92 | 2.87 | 0.04 |
| A_51_P407774 | NM_019723 | Slc22a21  | 56517  | member 21<br>transient receptor potential cation channel, subfamily V,                                | 4.56 | 2.87 | 0.00 |
| A_51_P302749 | NM_011706 | Trpv2     | 22368  | member 2                                                                                              | 7.03 | 2.87 | 0.00 |
| A_51_P422629 | NM_011603 | Tbpl1     | 237336 | TATA box binding protein-like 1                                                                       | 4.08 | 2.87 | 0.00 |
| A_51_P297388 | NM_027733 | Spata24   | 71242  | spermatogenesis associated 24<br>adenosine deaminase, tRNA-specific 2, TAD2 homolog                   | 4.20 | 2.87 | 0.00 |
| A_51_P496804 | NM_025748 | Adat2     | 66757  | ( <i>S. cerevisiae</i> )                                                                              | 5.32 | 2.87 | 0.00 |
| A_52_P450183 | AK122234  | Rapgef5   | 217944 | Rap guanine nucleotide exchange factor (GEF) 5<br>solute carrier family 16 (monocarboxylic acid       | 5.58 | 2.87 | 0.00 |
| A_51_P397363 | NM_009196 | Slc16a1   | 20501  | transporters), member 1                                                                               | 3.78 | 2.87 | 0.00 |
| A_52_P73385  | AK086933  | Fas       | 14102  | Fas (TNF receptor superfamily member 6)                                                               | 3.61 | 2.86 | 0.01 |
| A_51_P157193 | NM_023275 | Rhoj      | 80837  | ras homolog gene family, member J                                                                     | 4.79 | 2.86 | 0.00 |
| A_52_P148861 | NM_009743 | Bcl2l1    | 12048  | BCL2-like 1                                                                                           | 3.44 | 2.86 | 0.01 |
| A_52_P957260 | NA        | NA        | NA     | NA                                                                                                    | 2.89 | 2.86 | 0.04 |
| A_51_P117666 | BC055707  | 1810032O0 | 66293  | RIKEN cDNA 1810032O08 gene                                                                            | 4.23 | 2.86 | 0.00 |

|              |           |          |        |                                                                                |      |      |      |
|--------------|-----------|----------|--------|--------------------------------------------------------------------------------|------|------|------|
| A_52_P561293 | AK034782  | 9430037G | 320692 | RIKEN cDNA 9430037G07 gene                                                     | 4.54 | 2.86 | 0.00 |
| A_52_P221900 | NM_177325 | Tsr1     | 104662 | TSR1, 20S rRNA accumulation, homolog (yeast)                                   | 6.44 | 2.86 | 0.00 |
| A_51_P118443 | AK051656  | 2310014H | 76448  | RIKEN cDNA 2310014H01 gene                                                     | 3.23 | 2.86 | 0.01 |
| A_52_P412167 | NM_080467 | Atp6v0a4 | 140494 | ATPase, H+ transporting, lysosomal V0 subunit A4                               | 6.20 | 2.85 | 0.00 |
| A_52_P322141 | BC038890  | Ccdc88b  | 78317  | coiled-coil domain containing 88B                                              | 6.83 | 2.85 | 0.00 |
| A_52_P460037 | NM_020575 | 7-Mar    | 57438  | membrane-associated ring finger (C3HC4) 7                                      | 4.44 | 2.85 | 0.00 |
| A_51_P394690 | NM_175036 | Leprot   | 230514 | leptin receptor overlapping transcript                                         | 3.37 | 2.85 | 0.01 |
| A_52_P98625  | XM_884335 | Ankrd57  | 268301 | ankyrin repeat domain 57                                                       | 2.85 | 2.85 | 0.05 |
| A_51_P263302 | NM_178607 | Rnf24    | 51902  | ring finger protein 24                                                         | 5.10 | 2.85 | 0.00 |
| A_51_P105078 | NM_011311 | S100a4   | 20198  | S100 calcium binding protein A4                                                | 4.21 | 2.85 | 0.00 |
| A_51_P488211 | NM_153389 | Atp10d   | 231287 | ATPase, class V, type 10D                                                      | 4.74 | 2.85 | 0.00 |
| A_51_P194415 | NM_023908 | Slco3a1  | 108116 | solute carrier organic anion transporter family, member 3a1                    | 4.25 | 2.85 | 0.00 |
| A_51_P166648 | NM_027627 | 4931408A | 70967  | RIKEN cDNA 4931408A02 gene                                                     | 5.72 | 2.84 | 0.00 |
| A_52_P371494 | AK136456  | AI451617 | 209387 | expressed sequence AI451617                                                    | 3.36 | 2.84 | 0.01 |
| A_52_P77764  | NM_007514 | Slc7a2   | 11988  | solute carrier family 7 (cationic amino acid transporter, y+ system), member 2 | 4.09 | 2.84 | 0.00 |
| A_51_P225276 | NM_024181 | Dnajc10  | 66861  | Dnaj (Hsp40) homolog, subfamily C, member 10                                   | 4.42 | 2.84 | 0.00 |
| A_51_P260683 | NM_015811 | Rgs1     | 50778  | regulator of G-protein signaling 1                                             | 4.64 | 2.84 | 0.00 |
| A_51_P502054 | NM_145546 | Gtf2b    | 229906 | general transcription factor IIB                                               | 4.39 | 2.83 | 0.00 |
| A_52_P376360 | NM_019971 | Pdgfc    | 54635  | platelet-derived growth factor, C polypeptide                                  | 4.40 | 2.83 | 0.00 |
| A_52_P211185 | NM_008140 | Gnat1    | 14685  | guanine nucleotide binding protein, alpha transducing 1                        | 3.04 | 2.83 | 0.03 |
| A_52_P418665 | NM_029512 | Ttpal    | 76080  | tocopherol (alpha) transfer protein-like                                       | 3.68 | 2.83 | 0.01 |
| A_51_P159194 | NM_008416 | Junb     | 16477  | Jun-B oncogene                                                                 | 4.81 | 2.83 | 0.00 |
| A_52_P217100 | NA        | NA       | NA     | NA                                                                             | 8.21 | 2.83 | 0.00 |
| A_51_P134007 | NM_010880 | Ncl      | 17975  | nucleolin                                                                      | 7.46 | 2.83 | 0.00 |
| A_51_P359822 | NM_009160 | Sftpd    | 20390  | surfactant associated protein D                                                | 4.28 | 2.82 | 0.00 |
| A_51_P423039 | NM_145406 | Slc10a3  | 214601 | solute carrier family 10 (sodium/bile acid cotransporter family), member 3     | 5.23 | 2.82 | 0.00 |
| A_51_P281013 | BC033455  | 0610007L | 71667  | RIKEN cDNA 0610007L01 gene                                                     | 6.76 | 2.82 | 0.00 |
| A_51_P105380 | NM_029733 | 2010005H | 176770 | RIKEN cDNA 2010005H15 gene                                                     | 5.85 | 2.82 | 0.00 |
| A_52_P151853 | NM_001025 | Tpd52    | 21985  | tumor protein D52                                                              | 5.28 | 2.82 | 0.00 |

|               |           |          |        |                                                                                   |      |      |      |
|---------------|-----------|----------|--------|-----------------------------------------------------------------------------------|------|------|------|
| A_52_P323852  | NM_023680 | Tnfrsf22 | 79202  | tumor necrosis factor receptor superfamily, member 22                             | 3.90 | 2.82 | 0.00 |
| A_52_P43549   | NM_007646 | Cd38     | 12494  | CD38 antigen                                                                      | 4.14 | 2.82 | 0.00 |
| A_51_P333349  | NM_172541 | Tmem120a | 215210 | transmembrane protein 120A                                                        | 5.19 | 2.81 | 0.00 |
| A_51_P397296  | NM_028584 | Marveld3 | 73608  | MARVEL (membrane-associating) domain containing 3                                 | 3.50 | 2.81 | 0.01 |
| A_52_P177685  | NM_018821 | Socs6    | 54607  | suppressor of cytokine signaling 6                                                | 4.00 | 2.81 | 0.00 |
| A_51_P308796  | NM_010235 | Fosl1    | 14283  | fos-like antigen 1                                                                | 3.33 | 2.81 | 0.01 |
| A_51_P262878  | NM_026211 | Tmed9    | 67511  | transmembrane emp24 protein transport domain containing 9                         | 4.43 | 2.81 | 0.00 |
| A_52_P1093529 | NM_177320 | Pik3r5   | 320207 | phosphoinositide-3-kinase, regulatory subunit 5, p101                             | 6.65 | 2.81 | 0.00 |
| A_52_P410765  | NM_011352 | Sema7a   | 20361  | sema domain, immunoglobulin domain (Ig), and GPI membrane anchor, (semaphorin) 7A | 5.23 | 2.81 | 0.00 |
| A_52_P576230  | NM_001004 | Tacc2    | 57752  | transforming, acidic coiled-coil containing protein 2                             | 7.99 | 2.80 | 0.00 |
| A_51_P193146  | NM_028595 | Ms4a6c   | 73656  | membrane-spanning 4-domains, subfamily A, member 6C                               | 5.05 | 2.80 | 0.00 |
| A_51_P521056  | NM_018821 | Socs6    | 54607  | suppressor of cytokine signaling 6                                                | 3.59 | 2.80 | 0.01 |
| A_51_P356413  | NM_199068 | Foxk1    | 17425  | forkhead box K1                                                                   | 3.19 | 2.80 | 0.02 |
| A_51_P500344  | NM_145569 | Mat2a    | 232087 | methionine adenosyltransferase II, alpha                                          | 5.57 | 2.80 | 0.00 |
| A_52_P909274  | NM_011173 | Pros1    | 19128  | protein S (alpha)                                                                 | 4.83 | 2.80 | 0.00 |
| A_51_P179864  | NM_016979 | Prkx     | 19108  | protein kinase, X-linked                                                          | 5.06 | 2.80 | 0.00 |
| A_52_P490770  | AK141740  | Zfp26    | 22688  | zinc finger protein 26                                                            | 3.60 | 2.80 | 0.01 |
| A_51_P488888  | NM_013632 | Pnp1     | 18950  | purine-nucleoside phosphorylase 1                                                 | 3.29 | 2.80 | 0.01 |
| A_51_P136542  | NM_033601 | Bcl3     | 12051  | B-cell leukemia/lymphoma 3                                                        | 4.46 | 2.80 | 0.00 |
| A_51_P459615  | NM_198416 | Zzz3     | 108946 | zinc finger, ZZ domain containing 3                                               | 3.29 | 2.79 | 0.01 |
| A_51_P377376  | NM_178846 | Gnl3     | 30877  | guanine nucleotide binding protein-like 3 (nucleolar)                             | 4.33 | 2.79 | 0.00 |
| A_51_P314907  | NM_013726 | Dbf4     | 27214  | DBF4 homolog ( <i>S. cerevisiae</i> )                                             | 2.73 | 2.79 | 0.07 |
| A_51_P313157  | XM_979233 | NA       | NA     | NA                                                                                | 5.81 | 2.79 | 0.00 |
| A_51_P162794  | NM_010370 | Gzma     | 14938  | granzyme A                                                                        | 5.68 | 2.79 | 0.00 |
| A_52_P553820  | NA        | NA       | NA     | NA                                                                                | 4.12 | 2.79 | 0.00 |
| A_51_P192800  | NM_008175 | Grn      | 14824  | granulin                                                                          | 4.75 | 2.79 | 0.00 |

|              |           |                 |        |                                                                                          |      |      |      |
|--------------|-----------|-----------------|--------|------------------------------------------------------------------------------------------|------|------|------|
| A_51_P286995 | NM_025653 | 3110001I2:66598 |        | RIKEN cDNA 3110001I22 gene                                                               | 6.44 | 2.78 | 0.00 |
| A_51_P274039 | NM_007761 | Crcp            | 12909  | calcitonin gene-related peptide-receptor component protein                               | 4.10 | 2.78 | 0.00 |
| A_51_P202512 | NM_173182 | Fndc3b          | 72007  | fibronectin type III domain containing 3B                                                | 4.03 | 2.78 | 0.00 |
| A_51_P221014 | NM_010581 | Cd47            | 16423  | CD47 antigen (Rh-related antigen, integrin-associated signal transducer)                 | 5.38 | 2.77 | 0.00 |
| A_52_P492062 | XR_004049 | NA              | NA     | NA                                                                                       | 6.30 | 2.77 | 0.00 |
| A_51_P244453 | NM_172650 | Kctd3           | 226823 | potassium channel tetramerisation domain containing 3                                    | 3.46 | 2.77 | 0.01 |
| A_52_P640386 | NM_133857 | Usp53           | 99526  | ubiquitin specific peptidase 53                                                          | 2.94 | 2.77 | 0.04 |
| A_51_P445726 | NM_011095 | Lilrb3          | 18733  | leukocyte immunoglobulin-like receptor, subfamily B (with TM and ITIM domains), member 3 | 4.98 | 2.76 | 0.00 |
| A_51_P232913 | NM_009948 | Cpt1b           | 12895  | carnitine palmitoyltransferase 1b, muscle                                                | 4.47 | 2.76 | 0.00 |
| A_52_P413448 | AK019443  | Tmem49          | 75909  | transmembrane protein 49                                                                 | 4.91 | 2.76 | 0.00 |
| A_51_P371174 | NM_013863 | Bag3            | 29810  | BCL2-associated athanogene 3                                                             | 4.44 | 2.76 | 0.00 |
| A_52_P82991  | NA        | NA              | NA     | NA                                                                                       | 4.88 | 2.76 | 0.00 |
| A_51_P131661 | NM_024182 | Riok3           | 66878  | RIO kinase 3 (yeast)                                                                     | 5.51 | 2.76 | 0.00 |
| A_51_P152826 | NM_025872 | Golt1b          | 66964  | golgi transport 1 homolog B (S. cerevisiae)                                              | 5.31 | 2.76 | 0.00 |
| A_51_P325152 | NM_177374 | Trmt61a         | 328162 | tRNA methyltransferase 61 homolog A (S. cerevisiae)                                      | 5.19 | 2.76 | 0.00 |
| A_51_P507622 | NM_181593 | Itpkc           | 233011 | inositol 1,4,5-trisphosphate 3-kinase C                                                  | 2.84 | 2.75 | 0.05 |
| A_52_P597461 | NM_011386 | Skil            | 20482  | SKI-like                                                                                 | 6.80 | 2.75 | 0.00 |
| A_51_P333071 | NM_025514 | D10Ert64:52717  |        | DNA segment, Chr 10, ERATO Doi 641, expressed                                            | 5.21 | 2.75 | 0.00 |
| A_51_P195935 | BC067054  | Rprd2           | 75137  | regulation of nuclear pre-mRNA domain containing 2                                       | 4.04 | 2.75 | 0.00 |
| A_52_P135455 | AK148928  | Pdia6           | 71853  | protein disulfide isomerase associated 6                                                 | 2.75 | 2.75 | 0.06 |
| A_52_P309012 | AK033502  | Chmp4c          | 66371  | chromatin modifying protein 4C                                                           | 3.41 | 2.75 | 0.01 |
| A_52_P317524 | NM_153165 | Klhl15          | 236904 | kelch-like 15 (Drosophila)                                                               | 3.87 | 2.75 | 0.00 |
| A_51_P172752 | NM_025663 | Gpatch4         | 66614  | G patch domain containing 4                                                              | 3.56 | 2.75 | 0.01 |
| A_51_P114714 | NM_023233 | Trim13          | 66597  | tripartite motif-containing 13                                                           | 3.61 | 2.75 | 0.01 |
| A_51_P116946 | NM_080467 | Atp6v0a4        | 140494 | ATPase, H+ transporting, lysosomal V0 subunit A4                                         | 7.90 | 2.75 | 0.00 |
| A_51_P369252 | BC066148  | 4632434I1:74041 |        | RIKEN cDNA 4632434I11 gene                                                               | 3.83 | 2.75 | 0.00 |
| A_52_P503663 | NM_181748 | Gpr120          | 107221 | G protein-coupled receptor 120                                                           | 3.86 | 2.74 | 0.00 |



|               |            |                 |        |                                                                                                          |      |      |      |
|---------------|------------|-----------------|--------|----------------------------------------------------------------------------------------------------------|------|------|------|
| A_51_P482990  | NM_145996  | Arid5a          | 214855 | AT rich interactive domain 5A (MRF1-like)                                                                | 5.03 | 2.74 | 0.00 |
| A_52_P141338  | NM_022816  | Acot10          | 64833  | acyl-CoA thioesterase 10                                                                                 | 4.08 | 2.74 | 0.00 |
| A_52_P502828  | NM_001008! | Pde2a           | 207728 | phosphodiesterase 2A, cGMP-stimulated                                                                    | 5.54 | 2.74 | 0.00 |
| A_52_P589169  | NM_028079  | 201011110:72061 |        | RIKEN cDNA 2010111101 gene                                                                               | 5.23 | 2.74 | 0.00 |
| A_51_P409132  | NM_177325  | Tsr1            | 104662 | TSR1, 20S rRNA accumulation, homolog (yeast)                                                             | 5.00 | 2.74 | 0.00 |
| A_52_P86704   | NM_001039! | Arl4a           | 11861  | ADP-ribosylation factor-like 4A                                                                          | 3.48 | 2.73 | 0.01 |
| A_51_P405476  | NM_010185  | Fcer1g          | 14127  | Fc receptor, IgE, high affinity I, gamma polypeptide fusion, derived from t(12;16) malignant liposarcoma | 4.23 | 2.73 | 0.00 |
| A_51_P512364  | NM_139149  | Fus             | 233908 | (human)                                                                                                  | 4.70 | 2.73 | 0.00 |
| A_51_P318182  | XM_979235  | EG665756        | 665756 | predicted gene, EG665756                                                                                 | 5.66 | 2.73 | 0.00 |
| A_52_P118638  | NM_177103  | Senp5           | 320213 | SUMO/sentrin specific peptidase 5                                                                        | 6.55 | 2.72 | 0.00 |
| A_52_P197731  | NM_001025: | 2700007P2       | 212772 | RIKEN cDNA 2700007P21 gene                                                                               | 6.37 | 2.72 | 0.00 |
| A_52_P511821  | NM_027057  | Wdfy1           | 69368  | WD repeat and FYVE domain containing 1                                                                   | 3.60 | 2.72 | 0.01 |
| A_51_P248962  | XM_896388  | NA              | NA     | NA                                                                                                       | 5.10 | 2.72 | 0.00 |
| A_52_P670037  | NM_013747  | Golga5          | 27277  | golgi autoantigen, golgin subfamily a, 5                                                                 | 3.23 | 2.72 | 0.01 |
| A_52_P1061446 | XM_885873  | Baz1a           | 217578 | bromodomain adjacent to zinc finger domain 1A                                                            | 6.58 | 2.71 | 0.00 |
| A_51_P357744  | NM_010592  | Jund            | 16478  | Jun proto-oncogene related gene d                                                                        | 4.29 | 2.71 | 0.00 |
| A_52_P525183  | NM_134188  | Acot2           | 171210 | acyl-CoA thioesterase 2                                                                                  | 4.19 | 2.71 | 0.00 |
| A_52_P281209  | AK145066   | Kdm4a           | 230674 | lysine (K)-specific demethylase 4A                                                                       | 3.60 | 2.71 | 0.01 |
| A_51_P208121  | NM_182782  | Klhl25          | 207952 | kelch-like 25 (Drosophila)                                                                               | 2.95 | 2.71 | 0.03 |
| A_51_P518528  | NM_172920  | Dpy19l1         | 244745 | dpy-19-like 1 (C. elegans)                                                                               | 6.39 | 2.71 | 0.00 |
| A_51_P477250  | AK040652   | Abca6           | 76184  | ATP-binding cassette, sub-family A (ABC1), member 6                                                      | 3.74 | 2.71 | 0.01 |
| A_52_P254095  | NM_010818  | Cd200           | 17470  | CD200 antigen                                                                                            | 3.33 | 2.70 | 0.01 |
| A_51_P493364  | NM_144958  | Eif4a1          | 13681  | eukaryotic translation initiation factor 4A1                                                             | 4.28 | 2.70 | 0.00 |
| A_52_P101487  | AK158894   | Ddn             | 13199  | dendrin                                                                                                  | 5.30 | 2.70 | 0.00 |
| A_51_P193395  | NM_172428  | Ccdc134         | 76457  | coiled-coil domain containing 134                                                                        | 3.15 | 2.70 | 0.02 |
| A_51_P294970  | NM_172606  | 6-Mar           | 223455 | membrane-associated ring finger (C3HC4) 6                                                                | 3.79 | 2.70 | 0.00 |
| A_51_P136521  | NM_026671  | Lypd2           | 68311  | Ly6/Plaur domain containing 2                                                                            | 3.35 | 2.70 | 0.01 |
| A_51_P431433  | NM_031997  | Tmem2           | 83921  | transmembrane protein 2                                                                                  | 5.53 | 2.70 | 0.00 |
| A_52_P273177  | NM_008448  | Kif5b           | 16573  | kinesin family member 5B                                                                                 | 7.10 | 2.70 | 0.00 |
| A_51_P223498  | NM_172653  | Slc39a10        | 227059 | solute carrier family 39 (zinc transporter), member 10                                                   | 4.01 | 2.70 | 0.00 |

|              |           |           |        |                                                                    |      |      |      |
|--------------|-----------|-----------|--------|--------------------------------------------------------------------|------|------|------|
| A_51_P271439 | NM_001033 | Fam59a    | 381126 | family with sequence similarity 59, member A                       | 3.73 | 2.69 | 0.01 |
| A_52_P188827 | NM_181318 | Rasgef1b  | 320292 | RasGEF domain family, member 1B                                    | 2.79 | 2.69 | 0.05 |
| A_52_P210511 | NM_011612 | Tnfrsf9   | 21942  | tumor necrosis factor receptor superfamily, member 9               | 3.51 | 2.69 | 0.01 |
| A_52_P556111 | NM_178682 | 4933426M  | 217684 | RIKEN cDNA 4933426M11 gene                                         | 4.66 | 2.69 | 0.00 |
| A_51_P372826 | NM_145533 | Smox      | 228608 | spermine oxidase                                                   | 4.10 | 2.69 | 0.00 |
| A_52_P642801 | XM_618738 | Lats1     | 16798  | large tumor suppressor                                             | 4.65 | 2.69 | 0.00 |
| A_52_P624149 | NM_011631 | Hsp90b1   | 22027  | heat shock protein 90, beta (Grp94), member 1                      | 4.04 | 2.69 | 0.00 |
| A_52_P289893 | NM_181650 | Prdm4     | 72843  | PR domain containing 4                                             | 4.16 | 2.69 | 0.00 |
| A_51_P241457 | NM_013532 | Lilrb4    | 14728  | leukocyte immunoglobulin-like receptor, subfamily B, member 4      | 3.76 | 2.69 | 0.00 |
| A_52_P501697 | NM_011890 | Sgcb      | 24051  | sarcoglycan, beta (dystrophin-associated glycoprotein)             | 5.79 | 2.69 | 0.00 |
| A_52_P188261 | NM_001025 | Camk2d    | 108058 | calcium/calmodulin-dependent protein kinase II, delta              | 3.99 | 2.69 | 0.00 |
| A_52_P466542 | NM_172763 | Zfp809    | 235047 | zinc finger protein 809                                            | 4.55 | 2.68 | 0.00 |
| A_51_P387239 | NM_021792 | ligp1     | 60440  | interferon inducible GTPase 1                                      | 3.20 | 2.68 | 0.02 |
| A_51_P202911 | NM_144882 | Spats2l   | 67198  | spermatogenesis associated, serine-rich 2-like                     | 3.75 | 2.68 | 0.01 |
| A_52_P380418 | M32070    | Rarg      | 19411  | retinoic acid receptor, gamma                                      | 5.70 | 2.68 | 0.00 |
| A_52_P680436 | NM_025793 | Wdr45l    | 66840  | Wdr45 like                                                         | 4.45 | 2.68 | 0.00 |
| A_51_P453475 | NM_009201 | Slc1a5    | 20514  | solute carrier family 1 (neutral amino acid transporter), member 5 | 2.72 | 2.68 | 0.07 |
| A_51_P429335 | NM_019429 | Prss16    | 54373  | protease, serine, 16 (thymus)                                      | 5.30 | 2.68 | 0.00 |
| A_52_P8903   | NM_177140 | D230037D  | 320351 | RIKEN cDNA D230037D09 gene                                         | 5.91 | 2.67 | 0.00 |
| A_51_P390314 | AK165554  | Wdfy1     | 69368  | WD repeat and FYVE domain containing 1                             | 3.38 | 2.67 | 0.01 |
| A_51_P333839 | NM_019971 | Pdgfc     | 54635  | platelet-derived growth factor, C polypeptide                      | 3.80 | 2.67 | 0.00 |
| A_51_P216702 | NM_175313 | A130022J1 | 101351 | RIKEN cDNA A130022J15 gene                                         | 3.19 | 2.67 | 0.02 |
| A_52_P88910  | AK019498  | NA        | NA     | NA                                                                 | 3.89 | 2.66 | 0.00 |
| A_51_P338397 | NM_026145 | Kctd10    | 330171 | potassium channel tetramerisation domain containing 10             | 3.87 | 2.66 | 0.00 |
| A_52_P604613 | NM_010333 | S1pr2     | 14739  | sphingosine-1-phosphate receptor 2                                 | 3.75 | 2.66 | 0.00 |
| A_51_P147878 | NM_010432 | Hipk1     | 15257  | homeodomain interacting protein kinase 1                           | 4.18 | 2.66 | 0.00 |
| A_52_P479269 | NM_011519 | Sdc1      | 20969  | syndecan 1                                                         | 5.14 | 2.66 | 0.00 |

|              |            |            |        |                                                                                |      |      |      |
|--------------|------------|------------|--------|--------------------------------------------------------------------------------|------|------|------|
| A_51_P405478 | J05020     | Fcer1g     | 14127  | Fc receptor, IgE, high affinity I, gamma polypeptide                           | 2.74 | 2.66 | 0.06 |
| A_52_P305041 | NM_027045  | Gcap14     | 72972  | granule cell antiserum positive 14                                             | 4.39 | 2.66 | 0.00 |
| A_52_P188593 | NM_001007! | Gm447      | 242997 | predicted gene 447                                                             | 3.96 | 2.66 | 0.00 |
| A_52_P598309 | AK005231   | 1500012F0  | 68949  | RIKEN cDNA 1500012F01 gene                                                     | 5.25 | 2.66 | 0.00 |
| A_52_P189897 | NM_001039! | Gtf2a2     | 235459 | general transcription factor II A, 2                                           | 5.79 | 2.66 | 0.00 |
| A_51_P280761 | XM_885873  | Baz1a      | 217578 | bromodomain adjacent to zinc finger domain 1A                                  | 5.33 | 2.65 | 0.00 |
| A_52_P191059 | AK043395   | Zfp612     | 234725 | zinc finger protein 612                                                        | 3.79 | 2.65 | 0.00 |
| A_51_P125535 | NM_017374  | Ppp2cb     | 19053  | protein phosphatase 2 (formerly 2A), catalytic subunit, beta isoform           | 5.76 | 2.65 | 0.00 |
| A_51_P368171 | AK049415   | AU020206   | 101757 | expressed sequence AU020206                                                    | 2.81 | 2.65 | 0.05 |
| A_52_P109378 | NM_008039  | Fpr2       | 14289  | formyl peptide receptor 2                                                      | 3.99 | 2.65 | 0.00 |
| A_52_P548463 | NM_133365  | Dnahc5     | 110082 | dynein, axonemal, heavy chain 5                                                | 3.94 | 2.65 | 0.00 |
| A_51_P456941 | NM_010500  | Ier5       | 15939  | immediate early response 5                                                     | 4.77 | 2.65 | 0.00 |
| A_51_P292933 | NM_026396  | Brix1      | 67832  | BRX1, biogenesis of ribosomes, homolog ( <i>S. cerevisiae</i> )                | 5.36 | 2.65 | 0.00 |
| A_51_P228768 | NM_011409  | Slfn3      | 20557  | schlafen 3                                                                     | 5.32 | 2.65 | 0.00 |
| A_52_P15536  | NM_133349  | Zfand2a    | 100494 | zinc finger, AN1-type domain 2A                                                | 2.95 | 2.65 | 0.03 |
| A_52_P546660 | NM_183112  | 1700029I1! | 75641  | RIKEN cDNA 1700029I15 gene                                                     | 6.79 | 2.64 | 0.00 |
| A_51_P370975 | NM_011200  | Ptp4a1     | 19243  | protein tyrosine phosphatase 4a1                                               | 3.08 | 2.64 | 0.02 |
| A_52_P89567  | NM_007483  | Rhob       | 11852  | ras homolog gene family, member B                                              | 4.78 | 2.64 | 0.00 |
| A_52_P528690 | NM_033475  | Rab34      | 19376  | RAB34, member of RAS oncogene family                                           | 3.84 | 2.64 | 0.00 |
| A_51_P425696 | NM_029810  | Nt5c2      | 76952  | 5'-nucleotidase, cytosolic II                                                  | 4.42 | 2.64 | 0.00 |
| A_51_P364694 | AK138790   | Slfn5      | 327978 | schlafen 5                                                                     | 4.07 | 2.64 | 0.00 |
| A_52_P90337  | NM_010794  | Mgat1      | 17308  | mannoside acetylglucosaminyltransferase 1                                      | 5.39 | 2.64 | 0.00 |
| A_52_P84037  | AK033206   | Socs2      | 216233 | suppressor of cytokine signaling 2                                             | 3.03 | 2.64 | 0.03 |
| A_52_P206492 | NM_025390  | Pop4       | 66161  | processing of precursor 4, ribonuclease P/MRP family, ( <i>S. cerevisiae</i> ) | 3.21 | 2.63 | 0.02 |
| A_52_P605846 | NM_009883  | Cebpb      | 12608  | CCAAT/enhancer binding protein (C/EBP), beta                                   | 3.09 | 2.63 | 0.02 |
| A_52_P573336 | NM_172205  | Sbsn       | 282619 | suprabasin                                                                     | 3.38 | 2.63 | 0.01 |
| A_51_P459350 | NM_019771  | Dstn       | 56431  | destrin                                                                        | 4.12 | 2.62 | 0.00 |
| A_52_P492176 | NM_022023  | Gmfb       | 63985  | glia maturation factor, beta                                                   | 4.65 | 2.62 | 0.00 |
| A_52_P450045 | NM_011276  | Rlim       | 19820  | ring finger protein, LIM domain interacting                                    | 4.23 | 2.62 | 0.00 |
| A_52_P433643 | NM_170599  | Igsf11     | 207683 | immunoglobulin superfamily, member 11                                          | 6.45 | 2.62 | 0.00 |

|              |           |           |        |                                                                        |      |      |      |
|--------------|-----------|-----------|--------|------------------------------------------------------------------------|------|------|------|
| A_51_P377452 | NM_008677 | Ncf4      | 17972  | neutrophil cytosolic factor 4                                          | 3.65 | 2.62 | 0.01 |
| A_52_P465521 | NA        | NA        | NA     | NA                                                                     | 4.22 | 2.62 | 0.00 |
| A_52_P615096 | NM_015729 | Acox1     | 11430  | acyl-Coenzyme A oxidase 1, palmitoyl                                   | 3.92 | 2.62 | 0.00 |
| A_52_P84315  | BC034239  | Chd7      | 320790 | chromodomain helicase DNA binding protein 7                            | 6.70 | 2.62 | 0.00 |
| A_51_P130757 | NM_025408 | Acer3     | 66190  | alkaline ceramidase 3                                                  | 4.18 | 2.62 | 0.00 |
| A_51_P306031 | NA        | NA        | NA     | NA                                                                     | 4.83 | 2.62 | 0.00 |
| A_51_P184928 | NM_028968 | Ifitm7    | 74482  | interferon induced transmembrane protein 7                             | 5.10 | 2.62 | 0.00 |
| A_51_P273921 | NM_007599 | Capg      | 12332  | capping protein (actin filament), gelsolin-like                        | 4.98 | 2.62 | 0.00 |
| A_51_P248959 | XM_896388 | NA        | NA     | NA                                                                     | 3.64 | 2.61 | 0.01 |
| A_51_P225761 | AK031537  | Zcchc6    | 214290 | zinc finger, CCHC domain containing 6                                  | 3.84 | 2.61 | 0.00 |
| A_52_P212025 | AK012979  | Ror1      | 26563  | receptor tyrosine kinase-like orphan receptor 1                        | 3.46 | 2.61 | 0.01 |
| A_51_P265406 | NM_053194 | Ric8      | 101489 | resistance to inhibitors of cholinesterase 8 homolog (C. elegans)      | 6.81 | 2.60 | 0.00 |
| A_52_P361664 | NM_016862 | Vti1a     | 53611  | vesicle transport through interaction with t-SNAREs homolog 1A (yeast) | 6.35 | 2.60 | 0.00 |
| A_51_P408729 | NM_016966 | Phgdh     | 236539 | 3-phosphoglycerate dehydrogenase                                       | 5.72 | 2.60 | 0.00 |
| A_52_P243102 | NM_172650 | Kctd3     | 226823 | potassium channel tetramerisation domain containing 3                  | 4.06 | 2.60 | 0.00 |
| A_51_P409260 | NM_008539 | Smad1     | 17125  | MAD homolog 1 (Drosophila)                                             | 3.84 | 2.60 | 0.00 |
| A_52_P553589 | AK081256  | 90306170C | 217830 | RIKEN cDNA 90306170O03 gene                                            | 3.50 | 2.60 | 0.01 |
| A_52_P700056 | BC089618  | Gm11428   | 1E+08  | predicted gene 11428                                                   | 3.54 | 2.60 | 0.01 |
| A_51_P294288 | NM_146002 | Rhbdd2    | 215160 | rhomboid domain containing 2                                           | 4.70 | 2.60 | 0.00 |
| A_51_P382849 | NM_010330 | Emb       | 13723  | embigin                                                                | 6.21 | 2.59 | 0.00 |
| A_51_P113527 | NM_144958 | Eif4a1    | 13681  | eukaryotic translation initiation factor 4A1                           | 6.28 | 2.59 | 0.00 |
| A_51_P142529 | NM_011316 | Saa4      | 20211  | serum amyloid A 4                                                      | 4.11 | 2.59 | 0.00 |
| A_52_P171160 | NM_177281 | D930030D  | 320874 | RIKEN cDNA D930030D11 gene                                             | 3.93 | 2.59 | 0.00 |
| A_52_P579933 | NM_001029 | Slc16a6   | 104681 | solute carrier family 16 (monocarboxylic acid transporters), member 6  | 3.22 | 2.59 | 0.02 |
| A_51_P148311 | NM_028850 | Chic2     | 74277  | cysteine-rich hydrophobic domain 2                                     | 4.15 | 2.59 | 0.00 |
| A_52_P46310  | NM_027946 | Dcaf7     | 71833  | DDB1 and CUL4 associated factor 7                                      | 4.98 | 2.59 | 0.00 |
| A_51_P345975 | NM_022883 | Lpin3     | 64899  | lipin 3                                                                | 5.11 | 2.59 | 0.00 |
| A_52_P415750 | NM_021439 | Chst11    | 58250  | carbohydrate sulfotransferase 11                                       | 4.47 | 2.59 | 0.00 |
| A_51_P374533 | NM_146338 | Olf374    | 258335 | olfactory receptor 374                                                 | 4.46 | 2.58 | 0.00 |
| A_51_P282760 | NM_011066 | Per2      | 18627  | period homolog 2 (Drosophila)                                          | 2.99 | 2.58 | 0.03 |

|              |           |          |        |                                                                              |      |      |      |
|--------------|-----------|----------|--------|------------------------------------------------------------------------------|------|------|------|
| A_51_P203675 | NM_021407 | Trem3    | 58218  | triggering receptor expressed on myeloid cells 3                             | 6.75 | 2.58 | 0.00 |
| A_51_P310135 | NM_011544 | Tcf12    | 21406  | transcription factor 12                                                      | 5.57 | 2.58 | 0.00 |
| A_51_P198045 | AK012286  | Rab28    | 100972 | RAB28, member RAS oncogene family                                            | 4.85 | 2.58 | 0.00 |
| A_51_P128876 | NM_025378 | Ifitm3   | 66141  | interferon induced transmembrane protein 3                                   | 6.41 | 2.58 | 0.00 |
| A_52_P307267 | NM_008477 | Ktn1     | 16709  | kinectin 1                                                                   | 4.56 | 2.58 | 0.00 |
| A_51_P236721 | NM_133839 | Mmadhc   | 109129 | methymlalonic aciduria (cobalamin deficiency) cblD type, with homocystinuria | 5.06 | 2.58 | 0.00 |
| A_51_P161037 | AK172953  | Cep170   | 545389 | centrosomal protein 170                                                      | 6.24 | 2.58 | 0.00 |
| A_51_P491350 | NM_009932 | Col4a2   | 12827  | collagen, type IV, alpha 2                                                   | 4.97 | 2.58 | 0.00 |
| A_51_P346938 | NM_029796 | Lrg1     | 76905  | leucine-rich alpha-2-glycoprotein 1                                          | 3.99 | 2.57 | 0.00 |
| A_52_P550843 | NM_024282 | Pppde1   | 78825  | PPPDE peptidase domain containing 1                                          | 5.43 | 2.57 | 0.00 |
| A_51_P287635 | NM_008773 | P2ry2    | 18442  | purinergic receptor P2Y, G-protein coupled 2                                 | 3.75 | 2.57 | 0.00 |
| A_52_P413805 | AK028505  | Rad18    | 58186  | RAD18 homolog ( <i>S. cerevisiae</i> )                                       | 4.27 | 2.57 | 0.00 |
| A_51_P121058 | NM_011639 | Trip6    | 22051  | thyroid hormone receptor interactor 6                                        | 5.51 | 2.57 | 0.00 |
| A_52_P249826 | NM_020259 | Hhip     | 15245  | Hedgehog-interacting protein                                                 | 5.87 | 2.57 | 0.00 |
| A_52_P69998  | NM_025841 | Kdelr2   | 66913  | KDEL (Lys-Asp-Glu-Leu) endoplasmic reticulum protein retention receptor 2    | 3.92 | 2.56 | 0.00 |
| A_51_P354265 | NM_009256 | Serpinb9 | 20723  | serine (or cysteine) peptidase inhibitor, clade B, member 9                  | 3.85 | 2.56 | 0.00 |
| A_52_P669510 | NA        | NA       | NA     | NA                                                                           | 2.93 | 2.56 | 0.04 |
| A_52_P320032 | NM_139149 | Fus      | 233908 | fusion, derived from t(12;16) malignant liposarcoma (human)                  | 4.42 | 2.56 | 0.00 |
| A_51_P400581 | NM_023210 | Anp32e   | 66471  | acidic (leucine-rich) nuclear phosphoprotein 32 family, member E             | 4.84 | 2.56 | 0.00 |
| A_52_P495729 | NM_011019 | Osmr     | 18414  | oncostatin M receptor                                                        | 4.23 | 2.56 | 0.00 |
| A_51_P449935 | NM_025310 | Ftsj3    | 56095  | FtsJ homolog 3 ( <i>E. coli</i> )                                            | 3.11 | 2.56 | 0.02 |
| A_52_P309044 | NM_001012 | Ccdc55   | 237859 | coiled-coil domain containing 55                                             | 4.17 | 2.56 | 0.00 |
| A_51_P483324 | NM_008979 | Ptpn22   | 19260  | protein tyrosine phosphatase, non-receptor type 22 (lymphoid)                | 3.00 | 2.56 | 0.03 |
| A_52_P987461 | NM_001002 | NA       | NA     | NA                                                                           | 5.62 | 2.56 | 0.00 |
| A_52_P328249 | AK083076  | Pkm2     | 18746  | pyruvate kinase, muscle                                                      | 3.14 | 2.56 | 0.02 |
| A_52_P349738 | NM_024173 | Atp6v1g1 | 66290  | ATPase, H <sup>+</sup> transporting, lysosomal V1 subunit G1                 | 9.45 | 2.56 | 0.00 |
| A_51_P424828 | NM_026425 | Naa20    | 67877  | N(alpha)-acetyltransferase 20, NatB catalytic subunit                        | 3.07 | 2.55 | 0.02 |

|              |            |         |        |                                                                       |      |      |      |
|--------------|------------|---------|--------|-----------------------------------------------------------------------|------|------|------|
| A_51_P452977 | NM_008078  | Gad2    | 14417  | glutamic acid decarboxylase 2                                         | 3.84 | 2.55 | 0.00 |
| A_52_P338651 | NM_011256  | Pitpnm2 | 19679  | phosphatidylinositol transfer protein, membrane-associated 2          | 3.84 | 2.55 | 0.00 |
| A_51_P339824 | NM_177700  | Atmin   | 234776 | ATM interactor                                                        | 2.82 | 2.55 | 0.05 |
| A_51_P123216 | NM_029492  | Zdhhc20 | 75965  | zinc finger, DHHC domain containing 20                                | 4.14 | 2.55 | 0.00 |
| A_51_P492595 | NM_172518  | Fbxo42  | 213499 | F-box protein 42                                                      | 4.32 | 2.55 | 0.00 |
| A_51_P143224 | NM_013594  | Mbd1    | 17190  | methyl-CpG binding domain protein 1                                   | 3.92 | 2.55 | 0.00 |
| A_51_P225634 | NM_027306  | Zdhhc25 | 70073  | zinc finger, DHHC domain containing 25                                | 3.59 | 2.55 | 0.01 |
| A_52_P4148   | BC056964   | Taf1d   | 75316  | TATA box binding protein (Tbp)-associated factor, RNA polymerase I, D | 4.53 | 2.55 | 0.00 |
| A_52_P14456  | AK129457   | Srrm4   | 68955  | serine/arginine repetitive matrix 4                                   | 2.82 | 2.55 | 0.05 |
| A_51_P328883 | NM_145612  | Zfp810  | 235050 | zinc finger protein 810                                               | 4.07 | 2.55 | 0.00 |
| A_52_P665742 | BC069989   | Srebf2  | 20788  | sterol regulatory element binding factor 2                            | 3.22 | 2.54 | 0.02 |
| A_52_P168271 | NM_144895  | Spg20   | 229285 | spastic paraplegia 20, spartin (Troyer syndrome) homolog (human)      | 4.44 | 2.54 | 0.00 |
| A_52_P299746 | NM_133781  | Cab39   | 12283  | calcium binding protein 39                                            | 4.48 | 2.54 | 0.00 |
| A_52_P527800 | NM_145158  | Emilin2 | 246707 | elastin microfibril interfacier 2                                     | 4.09 | 2.54 | 0.00 |
| A_51_P288162 | NM_197982  | Ddx39   | 68278  | DEAD (Asp-Glu-Ala-Asp) box polypeptide 39                             | 6.84 | 2.54 | 0.00 |
| A_52_P21971  | NM_008678  | Ncoa2   | 17978  | nuclear receptor coactivator 2                                        | 3.39 | 2.54 | 0.01 |
| A_52_P642207 | NM_018810  | Mkrn1   | 54484  | makorin, ring finger protein, 1                                       | 5.87 | 2.54 | 0.00 |
| A_51_P415688 | NM_025278  | Gng12   | 14701  | guanine nucleotide binding protein (G protein), gamma 12              | 5.68 | 2.53 | 0.00 |
| A_51_P513072 | NM_175372  | Rdh13   | 108841 | retinol dehydrogenase 13 (all-trans and 9-cis)                        | 6.44 | 2.53 | 0.00 |
| A_52_P471583 | NM_199068  | Foxk1   | 17425  | forkhead box K1                                                       | 2.93 | 2.53 | 0.04 |
| A_51_P488383 | XM_0010052 | NA      | NA     | NA                                                                    | 3.32 | 2.53 | 0.01 |
| A_52_P302304 | NM_023268  | Qsox1   | 104009 | quiescin Q6 sulfhydryl oxidase 1                                      | 5.97 | 2.53 | 0.00 |
| A_51_P440460 | NM_145070  | Hip1r   | 29816  | huntingtin interacting protein 1 related                              | 3.61 | 2.53 | 0.01 |
| A_51_P377826 | AF224494   | Zfand2a | 100494 | zinc finger, AN1-type domain 2A                                       | 3.41 | 2.53 | 0.01 |
| A_51_P189985 | NM_145610  | Ppan    | 235036 | peter pan homolog (Drosophila)                                        | 4.40 | 2.53 | 0.00 |
| A_51_P253074 | NM_027979  | Chit1   | 71884  | chitinase 1 (chitotriosidase)                                         | 5.04 | 2.53 | 0.00 |
| A_51_P365932 | NM_026250  | Gin1    | 252876 | gypsy retrotransposon integrase 1                                     | 5.75 | 2.53 | 0.00 |
| A_51_P432180 | NM_001029  | Slc16a6 | 104681 | solute carrier family 16 (monocarboxylic acid transporters), member 6 | 3.12 | 2.53 | 0.02 |
| A_51_P207921 | NM_008898  | Por     | 18984  | P450 (cytochrome) oxidoreductase                                      | 5.34 | 2.52 | 0.00 |

|              |           |           |        |                                                                                          |      |      |      |
|--------------|-----------|-----------|--------|------------------------------------------------------------------------------------------|------|------|------|
| A_51_P256369 | NM_199322 | Dot1l     | 208266 | DOT1-like, histone H3 methyltransferase ( <i>S. cerevisiae</i> )                         | 4.13 | 2.52 | 0.00 |
| A_52_P341449 | NM_028352 | Pgm3      | 109785 | phosphoglucomutase 3                                                                     | 4.42 | 2.52 | 0.00 |
| A_51_P360004 | NM_029021 | 4833422F2 | 74614  | RIKEN cDNA 4833422F24 gene                                                               | 3.00 | 2.52 | 0.03 |
| A_51_P274803 | NM_175648 | A530023O1 | 244183 | RIKEN cDNA A530023O14 gene                                                               | 2.90 | 2.52 | 0.04 |
| A_52_P601383 | NM_011090 | Lilra6    | 18726  | leukocyte immunoglobulin-like receptor, subfamily A (with TM domain), member 6           | 6.30 | 2.52 | 0.00 |
| A_51_P505169 | NM_021720 | Donson    | 60364  | downstream neighbor of SON                                                               | 5.92 | 2.52 | 0.00 |
| A_52_P645275 | BC085283  | NA        | NA     | NA                                                                                       | 3.30 | 2.52 | 0.01 |
| A_52_P250517 | NM_011743 | Zfp106    | 20402  | zinc finger protein 106                                                                  | 4.85 | 2.52 | 0.00 |
| A_51_P312327 | NM_022415 | Ptges     | 64292  | prostaglandin E synthase                                                                 | 6.21 | 2.51 | 0.00 |
| A_52_P932984 | NA        | NA        | NA     | NA                                                                                       | 2.95 | 2.51 | 0.03 |
| A_52_P670970 | AK122466  | Usp31     | 76179  | ubiquitin specific peptidase 31                                                          | 2.83 | 2.51 | 0.05 |
| A_52_P451929 | NM_011090 | Lilra6    | 18726  | leukocyte immunoglobulin-like receptor, subfamily A (with TM domain), member 6           | 4.01 | 2.51 | 0.00 |
| A_51_P416387 | NM_019768 | Morf4l2   | 56397  | mortality factor 4 like 2                                                                | 5.12 | 2.51 | 0.00 |
| A_51_P241861 | NM_016921 | Tcirg1    | 27060  | T-cell, immune regulator 1, ATPase, H <sup>+</sup> transporting, lysosomal V0 protein A3 | 3.21 | 2.51 | 0.02 |
| A_51_P148037 | NM_177364 | Sh3pxd2b  | 268396 | SH3 and PX domains 2B                                                                    | 4.54 | 2.51 | 0.00 |
| A_52_P375312 | NM_001005 | Amica1    | 270152 | adhesion molecule, interacts with CXADR antigen 1                                        | 4.17 | 2.51 | 0.00 |
| A_52_P150988 | NM_029582 | Txndc11   | 106200 | thioredoxin domain containing 11                                                         | 4.82 | 2.51 | 0.00 |
| A_51_P151126 | NM_013706 | Cd52      | 23833  | CD52 antigen                                                                             | 4.15 | 2.51 | 0.00 |
| A_52_P431859 | NA        | NA        | NA     | NA                                                                                       | 3.56 | 2.51 | 0.01 |
| A_51_P317460 | NM_010824 | Mpo       | 17523  | myeloperoxidase                                                                          | 3.86 | 2.50 | 0.00 |
| A_51_P142989 | XM_920647 | NA        | NA     | NA                                                                                       | 5.86 | 2.50 | 0.00 |
| A_52_P37947  | NM_176976 | 5830418K0 | 319675 | RIKEN cDNA 5830418K08 gene                                                               | 6.08 | 2.50 | 0.00 |
| A_52_P590546 | NM_011631 | Hsp90b1   | 22027  | heat shock protein 90, beta (Grp94), member 1                                            | 4.61 | 2.50 | 0.00 |
| A_51_P438820 | NM_023258 | Pycard    | 66824  | PYD and CARD domain containing                                                           | 5.54 | 2.50 | 0.00 |
| A_51_P124315 | NM_177649 | NA        | NA     | NA                                                                                       | 4.48 | 2.50 | 0.00 |
| A_52_P104961 | NA        | NA        | NA     | NA                                                                                       | 4.08 | 2.50 | 0.00 |
| A_52_P76034  | NM_173867 | Rcc2      | 108911 | regulator of chromosome condensation 2                                                   | 3.41 | 2.50 | 0.01 |
| A_52_P332517 | NM_027314 | 5-Mar     | 69104  | membrane-associated ring finger (C3HC4) 5                                                | 3.30 | 2.50 | 0.01 |

|              |           |           |        |                                                                          |      |      |      |
|--------------|-----------|-----------|--------|--------------------------------------------------------------------------|------|------|------|
|              |           |           |        | glial cell line derived neurotrophic factor family receptor              |      |      |      |
| A_52_P311022 | NM_010279 | Gfra1     | 14585  | alpha 1                                                                  | 4.88 | 2.50 | 0.00 |
| A_51_P163444 | NM_025821 | Carhsp1   | 52502  | calcium regulated heat stable protein 1                                  | 3.54 | 2.50 | 0.01 |
| A_51_P285462 | NM_146276 | Olfr1394  | 258273 | olfactory receptor 1394                                                  | 4.46 | 2.50 | 0.00 |
| A_51_P212515 | NM_178726 | Ppm1l     | 242083 | protein phosphatase 1 (formerly 2C)-like                                 | 5.60 | 2.49 | 0.00 |
| A_52_P193440 | XM_976118 | NA        | NA     | NA                                                                       | 3.75 | 2.49 | 0.01 |
| A_51_P260433 | NM_008976 | Ptpn14    | 19250  | protein tyrosine phosphatase, non-receptor type 14                       | 3.54 | 2.49 | 0.01 |
| A_52_P157880 | XM_357943 | Gm1947    | 384929 | predicted gene 1947                                                      | 3.65 | 2.49 | 0.01 |
| A_51_P488730 | NM_175480 | Zfp612    | 234725 | zinc finger protein 612                                                  | 4.59 | 2.49 | 0.00 |
| A_52_P128906 | AK006810  | Zfp787    | 67109  | zinc finger protein 787                                                  | 5.01 | 2.49 | 0.00 |
| A_51_P470242 | NM_009028 | Rasl2-9   | 19428  | RAS-like, family 2, locus 9                                              | 4.14 | 2.49 | 0.00 |
| A_51_P157112 | NM_008458 | Serpina3c | 16625  | serine (or cysteine) peptidase inhibitor, clade A, member 3C             | 3.26 | 2.49 | 0.01 |
| A_52_P323111 | AK136463  | Lass6     | 241447 | LAG1 homolog, ceramide synthase 6                                        | 3.30 | 2.49 | 0.01 |
| A_51_P505795 | NM_145391 | Tapbpl    | 213233 | TAP binding protein-like                                                 | 4.43 | 2.49 | 0.00 |
| A_51_P103320 | AK173162  | Jmjd1c    | 108829 | jumonji domain containing 1C                                             | 4.47 | 2.49 | 0.00 |
| A_51_P354154 | NM_028003 | Rpap3     | 71919  | RNA polymerase II associated protein 3                                   | 6.23 | 2.49 | 0.00 |
| A_51_P388099 | NM_019693 | Bat1a     | 53817  | HLA-B-associated transcript 1A                                           | 4.20 | 2.48 | 0.00 |
| A_52_P74883  | BC082311  | Myo16     | 244281 | myosin XVI                                                               | 6.65 | 2.48 | 0.00 |
| A_52_P732529 | NM_001015 | Taf9      | 108143 | TAF9 RNA polymerase II, TATA box binding protein (TBP)-associated factor | 3.40 | 2.48 | 0.01 |
| A_52_P579654 | NM_148958 | Osbpl10   | 74486  | oxysterol binding protein-like 10                                        | 4.73 | 2.48 | 0.00 |
| A_51_P125368 | NM_008214 | Hars      | 15115  | histidyl-tRNA synthetase                                                 | 3.23 | 2.48 | 0.01 |
| A_52_P578790 | NM_013739 | Dok3      | 27261  | docking protein 3                                                        | 7.05 | 2.48 | 0.00 |
| A_52_P274352 | BC053027  | Mapk8     | 26419  | mitogen-activated protein kinase 8                                       | 4.67 | 2.48 | 0.00 |
| A_52_P228236 | NM_011638 | Tfrc      | 22042  | transferrin receptor                                                     | 3.67 | 2.48 | 0.01 |
| A_51_P221460 | NM_025661 | Ormdl3    | 66612  | ORM1-like 3 ( <i>S. cerevisiae</i> )                                     | 4.55 | 2.48 | 0.00 |
| A_52_P407220 | NM_146194 | Picalm    | 233489 | phosphatidylinositol binding clathrin assembly protein                   | 3.54 | 2.48 | 0.01 |
| A_51_P511315 | NM_011193 | Pstpip1   | 19200  | proline-serine-threonine phosphatase-interacting protein 1               | 6.81 | 2.48 | 0.00 |
| A_52_P153189 | NM_024269 | Arl2bp    | 107566 | ADP-ribosylation factor-like 2 binding protein                           | 4.19 | 2.47 | 0.00 |
| A_51_P295420 | NM_145931 | Zc3h7a    | 106205 | zinc finger CCCH type containing 7 A                                     | 3.82 | 2.47 | 0.00 |



|              |            |         |        |                                                                            |      |      |      |
|--------------|------------|---------|--------|----------------------------------------------------------------------------|------|------|------|
| A_51_P300277 | NM_009898  | Coro1a  | 12721  | coronin, actin binding protein 1A                                          | 4.37 | 2.47 | 0.00 |
| A_52_P625461 | AK088316   | lpo11   | 76582  | importin 11                                                                | 7.73 | 2.47 | 0.00 |
| A_51_P513568 | AK017897   | Stx11   | 74732  | syntaxin 11                                                                | 3.89 | 2.47 | 0.00 |
| A_52_P548680 | AK172036   | Pik3c2a | 18704  | phosphatidylinositol 3-kinase, C2 domain containing, alpha polypeptide     | 3.44 | 2.47 | 0.01 |
| A_52_P134158 | NM_024182  | Riok3   | 66878  | RIO kinase 3 (yeast)                                                       | 5.05 | 2.47 | 0.00 |
| A_51_P506402 | NM_183428  | Epb4.1  | 269587 | erythrocyte protein band 4.1                                               | 3.62 | 2.46 | 0.01 |
| A_52_P456640 | NM_010208  | Fgr     | 14191  | Gardner-Rasheed feline sarcoma viral (Fgr) oncogene homolog                | 3.23 | 2.46 | 0.01 |
| A_51_P424959 | NM_007528  | Bcl6b   | 12029  | B-cell CLL/lymphoma 6, member B                                            | 6.61 | 2.46 | 0.00 |
| A_51_P520066 | NM_020273  | Gmeb1   | 56809  | glucocorticoid modulatory element binding protein 1                        | 3.10 | 2.46 | 0.02 |
| A_51_P265444 | NM_172980  | Slc28a2 | 269346 | solute carrier family 28 (sodium-coupled nucleoside transporter), member 2 | 4.65 | 2.46 | 0.00 |
| A_52_P483129 | NM_030132  | Utp23   | 78581  | UTP23, small subunit (SSU) processome component, homolog (yeast)           | 3.04 | 2.46 | 0.03 |
| A_51_P500760 | XM_994514  | Eid2b   | 434156 | EP300 interacting inhibitor of differentiation 2B                          | 5.48 | 2.46 | 0.00 |
| A_52_P130642 | NM_028665  | Ankrd42 | 73845  | ankyrin repeat domain 42                                                   | 4.30 | 2.46 | 0.00 |
| A_52_P502717 | NM_176913  | Dpep2   | 319446 | dipeptidase 2                                                              | 3.53 | 2.46 | 0.01 |
| A_52_P193301 | NM_025519  | Chmp4c  | 66371  | chromatin modifying protein 4C                                             | 4.09 | 2.45 | 0.00 |
| A_51_P457306 | NM_015775  | Tmprss2 | 50528  | transmembrane protease, serine 2                                           | 4.95 | 2.45 | 0.00 |
| A_51_P270939 | NM_019650  | Gosr2   | 56494  | golgi SNAP receptor complex member 2                                       | 4.75 | 2.45 | 0.00 |
| A_52_P190286 | XM_0010062 | NA      | NA     | NA                                                                         | 6.32 | 2.45 | 0.00 |
| A_51_P106443 | NM_001014  | Ttll4   | 67534  | tubulin tyrosine ligase-like family, member 4                              | 3.86 | 2.45 | 0.00 |
| A_52_P327381 | NM_022424  | Fndc4   | 64339  | fibronectin type III domain containing 4                                   | 5.43 | 2.45 | 0.00 |
| A_51_P197213 | NM_025802  | Pnpla2  | 66853  | patatin-like phospholipase domain containing 2                             | 3.54 | 2.45 | 0.01 |
| A_51_P122740 | NM_028123  | Slc37a3 | 72144  | solute carrier family 37 (glycerol-3-phosphate transporter), member 3      | 4.76 | 2.45 | 0.00 |
| A_52_P87395  | NA         | NA      | NA     | NA                                                                         | 3.64 | 2.45 | 0.01 |
| A_52_P423424 | NM_015774  | Ero1l   | 50527  | ERO1-like ( <i>S. cerevisiae</i> )                                         | 5.93 | 2.45 | 0.00 |
| A_51_P108901 | NM_023731  | Ccdc86  | 108673 | coiled-coil domain containing 86                                           | 4.61 | 2.45 | 0.00 |
| A_52_P63553  | NM_009883  | Cebpb   | 12608  | CCAAT/enhancer binding protein (C/EBP), beta                               | 4.40 | 2.44 | 0.00 |
| A_51_P364146 | NM_010699  | Ldha    | 16828  | lactate dehydrogenase A                                                    | 4.20 | 2.44 | 0.00 |
| A_52_P184160 | NA         | NA      | NA     | NA                                                                         | 5.29 | 2.44 | 0.00 |

|              |            |           |        |                                                                                          |      |      |      |
|--------------|------------|-----------|--------|------------------------------------------------------------------------------------------|------|------|------|
| A_51_P211903 | NM_013747  | Golga5    | 27277  | golgi autoantigen, golgin subfamily a, 5                                                 | 4.15 | 2.44 | 0.00 |
| A_52_P293232 | NM_030705  | Mesdc1    | 80889  | mesoderm development candidate 1                                                         | 4.04 | 2.44 | 0.00 |
| A_51_P387632 | NM_022885  | Slc30a5   | 69048  | solute carrier family 30 (zinc transporter), member 5                                    | 3.70 | 2.44 | 0.01 |
| A_51_P325856 | NM_026985  | 1810033B1 | 69189  | RIKEN cDNA 1810033B17 gene                                                               | 6.56 | 2.44 | 0.00 |
| A_51_P109449 | NM_008519  | Ltb4r1    | 16995  | leukotriene B4 receptor 1                                                                | 4.43 | 2.44 | 0.00 |
| A_51_P433556 | NM_197993  | Tut1      | 70044  | terminal uridylyl transferase 1, U6 snRNA-specific                                       | 4.58 | 2.44 | 0.00 |
| A_51_P236991 | NM_028156  | 1700001P0 | 72215  | RIKEN cDNA 1700001P01 gene                                                               | 3.80 | 2.44 | 0.00 |
| A_51_P151254 | NM_134060  | Slc35b3   | 108652 | solute carrier family 35, member B3                                                      | 4.82 | 2.44 | 0.00 |
| A_52_P152133 | NM_023124  | H2-Q8     | 15019  | histocompatibility 2, Q region locus 8                                                   | 5.36 | 2.43 | 0.00 |
| A_51_P209807 | XM_0010017 | Ccnyl1    | 227210 | cyclin Y-like 1                                                                          | 3.64 | 2.43 | 0.01 |
| A_52_P520909 | AK143078   | Tmem214   | 68796  | transmembrane protein 214                                                                | 3.77 | 2.43 | 0.00 |
| A_52_P292528 | NM_023603  | Sfpq      | 71514  | splicing factor proline/glutamine rich (polypyrimidine tract binding protein associated) | 5.37 | 2.43 | 0.00 |
| A_52_P359071 | AK042039   | 4930599N2 | 75379  | RIKEN cDNA 4930599N23 gene                                                               | 4.00 | 2.42 | 0.00 |
| A_51_P466858 | NM_001039  | Asxl1     | 228790 | additional sex combs like 1 (Drosophila)                                                 | 4.15 | 2.42 | 0.00 |
| A_51_P272553 | NM_011498  | Bhlhe40   | 20893  | basic helix-loop-helix family, member e40                                                | 2.97 | 2.42 | 0.03 |
| A_51_P205209 | NM_018729  | Cd244     | 18106  | CD244 natural killer cell receptor 2B4                                                   | 4.51 | 2.42 | 0.00 |
| A_52_P648203 | XM_619304  | NA        | NA     | NA                                                                                       | 2.95 | 2.42 | 0.03 |
| A_52_P675039 | NM_028429  | Fhad1     | 329977 | forkhead-associated (FHA) phosphopeptide binding domain 1                                | 3.99 | 2.41 | 0.00 |
| A_51_P359018 | NM_011841  | Mapk7     | 23939  | mitogen-activated protein kinase 7                                                       | 4.06 | 2.41 | 0.00 |
| A_52_P196138 | BC038386   | Cep110    | 26920  | centrosomal protein 110                                                                  | 3.03 | 2.41 | 0.03 |
| A_51_P236175 | NM_009069  | Rit1      | 19769  | Ras-like without CAAX 1                                                                  | 3.74 | 2.41 | 0.01 |
| A_51_P452003 | NM_027497  | Epc1      | 13831  | enhancer of polycomb homolog 1 (Drosophila)                                              | 3.33 | 2.41 | 0.01 |
| A_51_P513244 | XM_150216  | 4930422I0 | 71640  | RIKEN cDNA 4930422I07 gene                                                               | 4.34 | 2.41 | 0.00 |
| A_52_P550858 | AK085407   | Ifi44     | 99899  | interferon-induced protein 44                                                            | 3.84 | 2.41 | 0.00 |
| A_52_P128283 | NM_001033  | Rnf149    | 67702  | ring finger protein 149                                                                  | 3.10 | 2.41 | 0.02 |
| A_52_P488471 | NM_008019  | Fkbp1a    | 14225  | FK506 binding protein 1a                                                                 | 5.09 | 2.41 | 0.00 |
| A_51_P417313 | NM_001015  | Taf9      | 108143 | TAF9 RNA polymerase II, TATA box binding protein (TBP)-associated factor                 | 5.43 | 2.41 | 0.00 |
| A_51_P226472 | NM_001035  | Akap2     | 11641  | A kinase (PRKA) anchor protein 2                                                         | 4.09 | 2.41 | 0.00 |

|               |           |           |        |                                                                           |      |      |      |
|---------------|-----------|-----------|--------|---------------------------------------------------------------------------|------|------|------|
| A_51_P183400  | NM_146194 | Picalm    | 233489 | phosphatidylinositol binding clathrin assembly protein                    | 5.67 | 2.41 | 0.00 |
| A_52_P496628  | NM_175381 | 2700081O1 | 108899 | RIKEN cDNA 2700081O15 gene                                                | 4.91 | 2.40 | 0.00 |
| A_52_P577853  | NM_177239 | Mysm1     | 320713 | myb-like, SWIRM and MPN domains 1                                         | 6.45 | 2.40 | 0.00 |
| A_52_P1131540 | AK046587  | NA        | NA     | NA                                                                        | 2.75 | 2.40 | 0.06 |
| A_51_P136883  | NM_009005 | Rab7      | 19349  | RAB7, member RAS oncogene family                                          | 4.06 | 2.40 | 0.00 |
| A_51_P320852  | NM_007657 | Cd9       | 12527  | CD9 antigen                                                               | 3.03 | 2.40 | 0.03 |
| A_51_P363818  | NM_019550 | Ptbp2     | 56195  | polypyrimidine tract binding protein 2                                    | 4.49 | 2.40 | 0.00 |
| A_52_P496142  | NM_009932 | Col4a2    | 12827  | collagen, type IV, alpha 2                                                | 5.17 | 2.40 | 0.00 |
| A_51_P143103  | BC066048  | Pprc1     | 226169 | peroxisome proliferative activated receptor, gamma, coactivator-related 1 | 4.98 | 2.40 | 0.00 |
| A_52_P156190  | NM_010332 | Ednra     | 13617  | endothelin receptor type A                                                | 4.18 | 2.40 | 0.00 |
| A_51_P510900  | NM_026460 | Serpini2  | 67931  | serine (or cysteine) peptidase inhibitor, clade I, member 2               | 4.40 | 2.39 | 0.00 |
| A_52_P335508  | NM_145513 | Tipr1     | 226591 | TIP41, TOR signalling pathway regulator-like (S. cerevisiae)              | 3.59 | 2.39 | 0.01 |
| A_51_P262079  | NM_010394 | H2-Q7     | 15018  | histocompatibility 2, Q region locus 7                                    | 5.04 | 2.39 | 0.00 |
| A_51_P125446  | NM_026963 | Lzic      | 69151  | leucine zipper and CTNNBIP1 domain containing                             | 3.90 | 2.39 | 0.00 |
| A_52_P153302  | NM_027238 | Ttc39b    | 69863  | tetratricopeptide repeat domain 39B                                       | 4.35 | 2.39 | 0.00 |
| A_51_P124345  | NM_153166 | Cpne5     | 240058 | copine V                                                                  | 5.04 | 2.39 | 0.00 |
| A_51_P413359  | NM_183201 | Slfn5     | 327978 | schlafen 5                                                                | 3.11 | 2.39 | 0.02 |
| A_51_P172131  | NM_026821 | D4Bwg095  | 52829  | DNA segment, Chr 4, Brigham & Women's Genetics 0951 expressed             | 3.62 | 2.39 | 0.01 |
| A_51_P488175  | AK053606  | Phf2011   | 239510 | PHD finger protein 20-like 1                                              | 6.35 | 2.39 | 0.00 |
| A_51_P216303  | NM_008608 | Mmp14     | 17387  | matrix metalloproteinase 14 (membrane-inserted)                           | 3.29 | 2.38 | 0.01 |
| A_51_P142089  | NM_016920 | Atp6v0a1  | 11975  | ATPase, H+ transporting, lysosomal V0 subunit A1                          | 6.00 | 2.38 | 0.00 |
| A_51_P207540  | NM_146826 | Olfr969   | 258823 | olfactory receptor 969                                                    | 5.37 | 2.38 | 0.00 |
| A_51_P411770  | NM_025391 | Nip7      | 66164  | nuclear import 7 homolog (S. cerevisiae)                                  | 4.88 | 2.38 | 0.00 |
| A_51_P150195  | NM_028860 | Mtmt3     | 74302  | myotubularin related protein 3                                            | 3.65 | 2.38 | 0.01 |
| A_51_P441426  | NM_019932 | Pf4       | 56744  | platelet factor 4                                                         | 3.35 | 2.38 | 0.01 |
| A_51_P294505  | NM_025658 | Ms4a4d    | 66607  | membrane-spanning 4-domains, subfamily A, member 4D                       | 4.84 | 2.38 | 0.00 |
| A_51_P253547  | NM_009984 | Ctsl      | 13039  | cathepsin L                                                               | 7.17 | 2.38 | 0.00 |

|              |           |           |        |                                                                          |      |      |      |
|--------------|-----------|-----------|--------|--------------------------------------------------------------------------|------|------|------|
| A_52_P266132 | NM_008013 | Fgl2      | 14190  | fibrinogen-like protein 2                                                | 3.53 | 2.38 | 0.01 |
| A_52_P623682 | NA        | NA        | NA     | NA                                                                       | 3.54 | 2.38 | 0.01 |
| A_51_P139780 | NM_009402 | Pglyrp1   | 21946  | peptidoglycan recognition protein 1                                      | 3.05 | 2.38 | 0.02 |
| A_52_P248483 | NM_001044 | Zfx       | 22764  | zinc finger protein X-linked                                             | 4.40 | 2.38 | 0.00 |
| A_51_P115829 | NM_025548 | Tbcb      | 66411  | tubulin folding cofactor B                                               | 4.36 | 2.38 | 0.00 |
| A_51_P431554 | BC027639  | 2310004N2 | 69535  | RIKEN cDNA 2310004N24 gene                                               | 6.95 | 2.37 | 0.00 |
| A_52_P469502 | NM_028176 | Cda       | 72269  | cytidine deaminase                                                       | 2.79 | 2.37 | 0.05 |
| A_52_P405465 | NM_011081 | Piga      | 18700  | phosphatidylinositol glycan anchor biosynthesis, class A                 | 4.25 | 2.37 | 0.00 |
| A_52_P716675 | NA        | NA        | NA     | NA                                                                       | 4.09 | 2.37 | 0.00 |
| A_51_P362202 | NM_175308 | Mobkl2c   | 100465 | MOB1, Mps One Binder kinase activator-like 2C (yeast)                    | 3.24 | 2.37 | 0.01 |
| A_51_P292943 | NM_007924 | Ell       | 13716  | elongation factor RNA polymerase II                                      | 4.27 | 2.37 | 0.00 |
| A_52_P219314 | NM_009499 | Vasp      | 22323  | vasodilator-stimulated phosphoprotein                                    | 6.50 | 2.37 | 0.00 |
| A_52_P542763 | NM_025824 | Bzw1      | 66882  | basic leucine zipper and W2 domains 1                                    | 5.61 | 2.37 | 0.00 |
| A_52_P636482 | NM_182650 | Hnrnpa2b1 | 53379  | heterogeneous nuclear ribonucleoprotein A2/B1                            | 7.28 | 2.37 | 0.00 |
| A_52_P85875  | NM_026998 | Snx6      | 72183  | sorting nexin 6                                                          | 5.87 | 2.37 | 0.00 |
| A_51_P294515 | NM_019580 | Gde1      | 56209  | glycerophosphodiester phosphodiesterase 1                                | 4.57 | 2.37 | 0.00 |
| A_52_P625672 | AK039294  | Lysmd4    | 75099  | LysM, putative peptidoglycan-binding, domain containing 4                | 4.82 | 2.36 | 0.00 |
| A_51_P254541 | NM_007527 | Bax       | 12028  | BCL2-associated X protein                                                | 5.44 | 2.36 | 0.00 |
| A_51_P520310 | NM_007440 | Alox12    | 11684  | arachidonate 12-lipoxygenase                                             | 4.52 | 2.36 | 0.00 |
| A_51_P275764 | NM_019807 | Acpp      | 56318  | acid phosphatase, prostate                                               | 3.86 | 2.36 | 0.00 |
| A_52_P925038 | NA        | NA        | NA     | NA                                                                       | 4.53 | 2.36 | 0.00 |
| A_52_P467449 | NM_007440 | Alox12    | 11684  | arachidonate 12-lipoxygenase                                             | 3.96 | 2.36 | 0.00 |
| A_51_P306739 | NM_175227 | NA        | NA     | NA                                                                       | 4.82 | 2.36 | 0.00 |
| A_52_P302977 | NM_001015 | Taf9      | 108143 | TAF9 RNA polymerase II, TATA box binding protein (TBP)-associated factor | 6.23 | 2.36 | 0.00 |
| A_51_P287606 | NM_028484 | 1700037C1 | 73261  | RIKEN cDNA 1700037C18 gene                                               | 3.27 | 2.36 | 0.01 |
| A_52_P516021 | BF165830  | Ptpn1     | 19246  | protein tyrosine phosphatase, non-receptor type 1                        | 6.08 | 2.36 | 0.00 |
| A_52_P498846 | AK009963  | NA        | NA     | NA                                                                       | 5.45 | 2.36 | 0.00 |
| A_51_P245939 | AK051045  | Snhg1     | 83673  | small nucleolar RNA host gene (non-protein coding) 1                     | 4.53 | 2.36 | 0.00 |

|              |           |            |        |                                                                                                  |      |      |      |
|--------------|-----------|------------|--------|--------------------------------------------------------------------------------------------------|------|------|------|
| A_51_P469288 | NM_028245 | Zfp131     | 72465  | zinc finger protein 131<br>protein phosphatase 2 (formerly 2A), regulatory subunit               | 4.22 | 2.35 | 0.00 |
| A_51_P301736 | NM_028032 | Ppp2r2a    | 71978  | B (PR 52), alpha isoform                                                                         | 4.54 | 2.35 | 0.00 |
| A_52_P537140 | AK047235  | Zdhhc24    | 70605  | zinc finger, DHHC domain containing 24                                                           | 4.25 | 2.35 | 0.00 |
| A_51_P417612 | NM_008200 | NA         | NA     | NA                                                                                               | 3.36 | 2.35 | 0.01 |
| A_51_P302576 | NM_009259 | Spn        | 20737  | sialophorin                                                                                      | 4.37 | 2.35 | 0.00 |
| A_52_P409601 | NM_170701 | Cd40       | 21939  | CD40 antigen                                                                                     | 3.06 | 2.35 | 0.02 |
| A_51_P275077 | NM_021332 | Glp1r      | 14652  | glucagon-like peptide 1 receptor                                                                 | 2.93 | 2.35 | 0.04 |
| A_52_P323621 | NA        | NA         | NA     | NA                                                                                               | 3.82 | 2.35 | 0.00 |
| A_51_P455657 | AK014551  | Dennd1b    | 329260 | DENN/MADD domain containing 1B                                                                   | 3.62 | 2.35 | 0.01 |
| A_51_P189746 | NM_145478 | Pim3       | 223775 | proviral integration site 3<br>resistance to inhibitors of cholinesterase 8 homolog (C. elegans) | 3.45 | 2.35 | 0.01 |
| A_52_P642056 | NM_053194 | Ric8       | 101489 | elegans)                                                                                         | 5.45 | 2.35 | 0.00 |
| A_52_P503927 | NM_001033 | Tmem181a   | 77106  | transmembrane protein 181A<br>STT3, subunit of the oligosaccharyltransferase complex,            | 4.46 | 2.35 | 0.00 |
| A_51_P149621 | NM_024222 | Stt3b      | 68292  | homolog B (S. cerevisiae)                                                                        | 4.44 | 2.35 | 0.00 |
| A_51_P320593 | NM_027185 | Def6       | 23853  | differentially expressed in FDCP 6                                                               | 5.19 | 2.35 | 0.00 |
| A_52_P272534 | NA        | NA         | NA     | NA                                                                                               | 5.26 | 2.35 | 0.00 |
| A_52_P370476 | BC043039  | Msl1       | 74026  | male-specific lethal 1 homolog (Drosophila)                                                      | 4.11 | 2.35 | 0.00 |
| A_51_P477121 | NM_021451 | Pmaip1     | 58801  | phorbol-12-myristate-13-acetate-induced protein 1                                                | 3.46 | 2.35 | 0.01 |
| A_52_P700067 | BG067131  | NA         | NA     | NA                                                                                               | 5.98 | 2.35 | 0.00 |
| A_51_P297346 | NM_029153 | Scamp1     | 107767 | secretory carrier membrane protein 1                                                             | 3.70 | 2.34 | 0.01 |
| A_51_P412947 | NM_007968 | Ewsr1      | 14030  | Ewing sarcoma breakpoint region 1                                                                | 6.43 | 2.34 | 0.00 |
| A_51_P109508 | NM_134250 | Havcr2     | 171285 | hepatitis A virus cellular receptor 2                                                            | 6.63 | 2.34 | 0.00 |
| A_52_P284658 | NM_029976 | Cdkn2aipnl | 52626  | CDKN2A interacting protein N-terminal like                                                       | 6.45 | 2.34 | 0.00 |
| A_52_P329875 | NM_008929 | Dnajc3     | 1E+08  | Dnaj (Hsp40) homolog, subfamily C, member 3                                                      | 4.98 | 2.34 | 0.00 |
| A_52_P354844 | AK029268  | Eda2r      | 245527 | ectodysplasin A2 isoform receptor                                                                | 5.07 | 2.34 | 0.00 |
| A_51_P483658 | NM_018880 | Trim3      | 55992  | tripartite motif-containing 3                                                                    | 3.70 | 2.34 | 0.01 |
| A_51_P385099 | NM_013693 | Tnf        | 21926  | tumor necrosis factor                                                                            | 5.19 | 2.34 | 0.00 |
| A_52_P135282 | NM_212447 | Marveld3   | 73608  | MARVEL (membrane-associating) domain containing 3                                                | 4.12 | 2.34 | 0.00 |
| A_51_P135944 | M92418    | Stfa2      | 20862  | stefin A2                                                                                        | 5.14 | 2.34 | 0.00 |
| A_51_P277994 | NM_145227 | Oas2       | 246728 | 2'-5' oligoadenylate synthetase 2                                                                | 3.57 | 2.34 | 0.01 |

|              |           |           |        |                                                                                                        |      |      |      |
|--------------|-----------|-----------|--------|--------------------------------------------------------------------------------------------------------|------|------|------|
| A_52_P568250 | BC056383  | Luc7I2    | 192196 | LUC7-like 2 ( <i>S. cerevisiae</i> )                                                                   | 4.90 | 2.34 | 0.00 |
| A_52_P628060 | NM_054043 | Msi2      | 76626  | Musashi homolog 2 ( <i>Drosophila</i> )                                                                | 3.71 | 2.34 | 0.01 |
| A_51_P178319 | NM_029466 | Arl5b     | 75869  | ADP-ribosylation factor-like 5B                                                                        | 2.96 | 2.34 | 0.03 |
| A_52_P656860 | NM_026232 | Slc25a30  | 67554  | solute carrier family 25, member 30                                                                    | 4.08 | 2.34 | 0.00 |
| A_51_P336385 | NM_175551 | Dido1     | 23856  | death inducer-obliterator 1                                                                            | 6.98 | 2.34 | 0.00 |
| A_52_P413035 | NM_013785 | Ip6k1     | 27399  | inositol hexaphosphate kinase 1                                                                        | 3.45 | 2.33 | 0.01 |
| A_51_P476660 | XM_890447 | Mllt4     | 17356  | myeloid/lymphoid or mixed-lineage leukemia (trithorax homolog, <i>Drosophila</i> ); translocated to, 4 | 4.69 | 2.33 | 0.00 |
| A_52_P415426 | NM_029756 | Sdccag8   | 76816  | serologically defined colon cancer antigen 8                                                           | 3.31 | 2.33 | 0.01 |
| A_51_P218563 | NM_153566 | Yrdc      | 230734 | yrdC domain containing ( <i>E.coli</i> )                                                               | 3.64 | 2.33 | 0.01 |
| A_51_P488340 | NM_016715 | Crlf2     | 57914  | cytokine receptor-like factor 2                                                                        | 3.69 | 2.33 | 0.01 |
| A_52_P214573 | AK003980  | Lysmd3    | 80289  | LysM, putative peptidoglycan-binding, domain containing 3                                              | 2.84 | 2.33 | 0.05 |
| A_52_P244463 | AK033828  | D16Ert47  | 67102  | DNA segment, Chr 16, ERATO Doi 472, expressed                                                          | 4.71 | 2.33 | 0.00 |
| A_51_P209527 | NM_009740 | Bcl10     | 12042  | B-cell leukemia/lymphoma 10                                                                            | 3.77 | 2.33 | 0.00 |
| A_52_P586391 | NA        | NA        | NA     | NA                                                                                                     | 2.91 | 2.33 | 0.04 |
| A_52_P40241  | XM_904306 | Zfp746    | 69228  | zinc finger protein 746                                                                                | 2.92 | 2.33 | 0.04 |
| A_52_P103590 | NM_172920 | Dpy19l1   | 244745 | dpy-19-like 1 ( <i>C. elegans</i> )                                                                    | 3.12 | 2.33 | 0.02 |
| A_51_P296866 | NM_008629 | Msi1      | 17690  | Musashi homolog 1( <i>Drosophila</i> )                                                                 | 4.31 | 2.33 | 0.00 |
| A_51_P343833 | NM_009421 | Traf1     | 22029  | TNF receptor-associated factor 1                                                                       | 5.53 | 2.32 | 0.00 |
| A_51_P464633 | NM_011233 | Rad17     | 19356  | RAD17 homolog ( <i>S. pombe</i> )                                                                      | 5.00 | 2.32 | 0.00 |
| A_52_P34931  | AK049836  | Prmt3     | 71974  | protein arginine N-methyltransferase 3                                                                 | 2.95 | 2.32 | 0.03 |
| A_51_P180001 | BC096465  | Eif2c2    | 239528 | eukaryotic translation initiation factor 2C, 2                                                         | 3.87 | 2.32 | 0.00 |
| A_51_P468762 | NM_198027 | Alkbh6    | 233065 | alkB, alkylation repair homolog 6 ( <i>E. coli</i> )                                                   | 4.49 | 2.32 | 0.00 |
| A_51_P317618 | NM_025795 | Ncaph2    | 52683  | non-SMC condensin II complex, subunit H2                                                               | 6.31 | 2.32 | 0.00 |
| A_51_P291347 | NM_013614 | Odc1      | 18263  | ornithine decarboxylase, structural 1                                                                  | 6.00 | 2.32 | 0.00 |
| A_51_P506674 | NM_001013 | Rpp38     | 227522 | ribonuclease P/MRP 38 subunit (human)                                                                  | 3.92 | 2.32 | 0.00 |
| A_52_P149590 | NM_144848 | Eppk1     | 223650 | epiplakin 1                                                                                            | 5.12 | 2.31 | 0.00 |
| A_52_P628521 | AK045264  | B130052P1 | 105442 | RIKEN cDNA B130052P14 gene                                                                             | 3.71 | 2.31 | 0.01 |
| A_51_P516860 | AK122234  | Rapgef5   | 217944 | Rap guanine nucleotide exchange factor (GEF) 5                                                         | 4.45 | 2.31 | 0.00 |
| A_51_P341717 | AF251703  | Cd300lf   | 246746 | CD300 antigen like family member F                                                                     | 4.65 | 2.31 | 0.00 |
| A_52_P579640 | NM_021511 | Rrs1      | 59014  | RRS1 ribosome biogenesis regulator homolog ( <i>S. cerevisiae</i> )                                    | 3.66 | 2.31 | 0.01 |

|              |           |         |        |                                                                      |      |      |      |
|--------------|-----------|---------|--------|----------------------------------------------------------------------|------|------|------|
| A_52_P660385 | NM_175113 | Trmt6   | 66926  | tRNA methyltransferase 6 homolog ( <i>S. cerevisiae</i> )            | 4.67 | 2.31 | 0.00 |
| A_51_P359549 | NM_173423 | Fem1c   | 240263 | fem-1 homolog c ( <i>C.elegans</i> )                                 | 4.73 | 2.31 | 0.00 |
| A_52_P244064 | NM_019803 | Ube2g2  | 22213  | ubiquitin-conjugating enzyme E2G 2                                   | 4.11 | 2.31 | 0.00 |
|              |           |         |        | mediator of RNA polymerase II transcription, subunit 10              |      |      |      |
| A_51_P219433 | NM_138596 | Med10   | 28077  | homolog (NUT2, <i>S. cerevisiae</i> )                                | 4.94 | 2.31 | 0.00 |
| A_51_P289912 | XM_203999 | Rapgef2 | 76089  | Rap guanine nucleotide exchange factor (GEF) 2                       | 4.54 | 2.31 | 0.00 |
| A_51_P202498 | NM_009120 | Sar1a   | 20224  | SAR1 gene homolog A ( <i>S. cerevisiae</i> )                         | 5.14 | 2.31 | 0.00 |
| A_51_P216315 | NM_027404 | Bag5    | 70369  | BCL2-associated athanogene 5                                         | 3.02 | 2.30 | 0.03 |
| A_51_P236234 | NM_011346 | Sell    | 20343  | selectin, lymphocyte                                                 | 5.20 | 2.30 | 0.00 |
| A_51_P235687 | NM_009663 | Alox5ap | 11690  | arachidonate 5-lipoxygenase activating protein                       | 3.77 | 2.30 | 0.00 |
| A_51_P374726 | NM_008987 | Ptx3    | 19288  | pentraxin related gene                                               | 2.77 | 2.30 | 0.05 |
| A_52_P668184 | NM_025907 | Mettl6  | 67011  | methyltransferase like 6                                             | 5.72 | 2.30 | 0.00 |
|              |           |         |        | protein phosphatase 2 (formerly 2A), catalytic subunit, beta isoform |      |      |      |
| A_51_P125538 | NM_017374 | Ppp2cb  | 19053  | beta isoform                                                         | 4.03 | 2.30 | 0.00 |
| A_51_P228846 | NM_015797 | Fbxo6   | 50762  | F-box protein 6                                                      | 5.62 | 2.30 | 0.00 |
| A_51_P508602 | NM_009341 | Tcp10c  | 21462  | t-complex protein 10c                                                | 4.56 | 2.30 | 0.00 |
| A_51_P323418 | AK036907  | NA      | NA     | NA                                                                   | 3.42 | 2.30 | 0.01 |
| A_51_P415220 | NM_009517 | Zmat3   | 22401  | zinc finger matrin type 3                                            | 5.15 | 2.30 | 0.00 |
| A_51_P442583 | XM_994286 | Parp4   | 328417 | poly (ADP-ribose) polymerase family, member 4                        | 3.76 | 2.30 | 0.00 |
| A_51_P138952 | NM_028815 | Cep97   | 74201  | centrosomal protein 97                                               | 4.20 | 2.30 | 0.00 |
| A_52_P26106  | NM_174876 | Impg2   | 224224 | interphotoreceptor matrix proteoglycan 2                             | 3.82 | 2.30 | 0.00 |
| A_52_P126238 | NM_008065 | Gabpa   | 14390  | GA repeat binding protein, alpha                                     | 3.25 | 2.30 | 0.01 |
| A_51_P420698 | NM_023662 | Pcm1    | 18536  | pericentriolar material 1                                            | 3.22 | 2.29 | 0.02 |
| A_51_P206585 | NM_009821 | Runx1   | 12394  | runt related transcription factor 1                                  | 4.56 | 2.29 | 0.00 |
| A_51_P233059 | NM_008477 | Ktn1    | 16709  | kinectin 1                                                           | 5.81 | 2.29 | 0.00 |
| A_52_P192566 | NM_183165 | Pyroxd1 | 232491 | pyridine nucleotide-disulphide oxidoreductase domain 1               | 4.13 | 2.29 | 0.00 |
| A_51_P193669 | NM_133801 | Gtf2f1  | 98053  | general transcription factor IIF, polypeptide 1                      | 6.12 | 2.29 | 0.00 |
| A_52_P251703 | D28599    | Vcan    | 13003  | versican                                                             | 4.29 | 2.29 | 0.00 |
| A_52_P214897 | AK046035  | Prkrip1 | 66801  | Prkr interacting protein 1 (IL11 inducible)                          | 2.70 | 2.29 | 0.07 |
| A_51_P442933 | NM_177275 | Amigo3  | 320844 | adhesion molecule with Ig like domain 3                              | 3.85 | 2.29 | 0.00 |
| A_51_P329243 | NM_178936 | Tmem56  | 99887  | transmembrane protein 56                                             | 4.05 | 2.29 | 0.00 |

|              |           |            |        |                                                                                               |      |      |      |
|--------------|-----------|------------|--------|-----------------------------------------------------------------------------------------------|------|------|------|
| A_51_P189594 | NM_029001 | Elov17     | 74559  | ELOVL family member 7, elongation of long chain fatty acids (yeast)                           | 3.44 | 2.29 | 0.01 |
| A_51_P126177 | NM_026160 | Map1lc3b   | 67443  | microtubule-associated protein 1 light chain 3 beta                                           | 4.84 | 2.29 | 0.00 |
| A_51_P115326 | NM_011512 | Surf4      | 20932  | surfeit gene 4                                                                                | 4.02 | 2.29 | 0.00 |
| A_52_P415116 | NM_021406 | Trem1      | 58217  | triggering receptor expressed on myeloid cells 1                                              | 4.06 | 2.29 | 0.00 |
| A_51_P200083 | NM_023168 | Grina      | 66168  | glutamate receptor, ionotropic, N-methyl D-aspartate-associated protein 1 (glutamate binding) | 6.20 | 2.29 | 0.00 |
| A_52_P532880 | NA        | NA         | NA     | NA                                                                                            | 5.27 | 2.29 | 0.00 |
| A_52_P249514 | NM_011331 | Ccl12      | 20293  | chemokine (C-C motif) ligand 12                                                               | 3.41 | 2.29 | 0.01 |
| A_52_P279852 | AK081551  | Mrp152     | 68836  | mitochondrial ribosomal protein L52                                                           | 4.23 | 2.29 | 0.00 |
| A_51_P199175 | AK002390  | 2700038G2  | 67194  | RIKEN cDNA 2700038G22 gene                                                                    | 5.75 | 2.28 | 0.00 |
| A_52_P245648 | NM_008577 | Slc3a2     | 17254  | solute carrier family 3 (activators of dibasic and neutral amino acid transport), member 2    | 5.86 | 2.28 | 0.00 |
| A_52_P614731 | NM_025278 | Gng12      | 14701  | guanine nucleotide binding protein (G protein), gamma 12                                      | 3.18 | 2.28 | 0.02 |
| A_51_P119460 | NM_133196 | Cstf2      | 108062 | cleavage stimulation factor, 3' pre-RNA subunit 2                                             | 4.68 | 2.28 | 0.00 |
| A_51_P438278 | AK032239  | Mtus2      | 77521  | microtubule associated tumor suppressor candidate 2                                           | 3.14 | 2.28 | 0.02 |
| A_51_P352981 | AK030345  | 5230400M3  | 329406 | RIKEN cDNA 5230400M03 gene                                                                    | 4.68 | 2.28 | 0.00 |
| A_51_P286563 | NM_010303 | Gna13      | 14674  | guanine nucleotide binding protein, alpha 13                                                  | 3.43 | 2.28 | 0.01 |
| A_51_P259378 | NM_030743 | Rnf114     | 81018  | ring finger protein 114                                                                       | 4.08 | 2.28 | 0.00 |
| A_51_P430766 | NM_010548 | Il10       | 16153  | interleukin 10                                                                                | 4.15 | 2.28 | 0.00 |
| A_52_P429308 | NM_025994 | Efhd2      | 27984  | EF hand domain containing 2                                                                   | 4.11 | 2.28 | 0.00 |
| A_52_P510877 | NM_009743 | Bcl2l1     | 12048  | BCL2-like 1                                                                                   | 3.27 | 2.28 | 0.01 |
| A_51_P162326 | AK037062  | 9930105H17 | 100669 | RIKEN cDNA 9930105H17 gene                                                                    | 4.54 | 2.28 | 0.00 |
| A_52_P622941 | AK034948  | Slc25a37   | 67712  | solute carrier family 25, member 37                                                           | 3.69 | 2.27 | 0.01 |
| A_52_P604195 | NM_001025 | Mbp        | 17196  | myelin basic protein                                                                          | 3.41 | 2.27 | 0.01 |
| A_51_P475291 | NM_022323 | Moap1      | 64113  | modulator of apoptosis 1                                                                      | 4.31 | 2.27 | 0.00 |
| A_52_P485450 | NM_025418 | Vta1       | 66201  | Vps20-associated 1 homolog ( <i>S. cerevisiae</i> )                                           | 3.28 | 2.27 | 0.01 |
| A_52_P174915 | NM_010288 | Gja1       | 14609  | gap junction protein, alpha 1                                                                 | 3.96 | 2.27 | 0.00 |
| A_52_P298854 | NM_028244 | Rrp1b      | 72462  | ribosomal RNA processing 1 homolog B ( <i>S. cerevisiae</i> )                                 | 4.05 | 2.27 | 0.00 |



|              |           |           |        |                                                   |      |      |      |
|--------------|-----------|-----------|--------|---------------------------------------------------|------|------|------|
| A_51_P413111 | AK147389  | Ppm1l     | 242083 | protein phosphatase 1 (formerly 2C)-like          | 3.29 | 2.27 | 0.01 |
| A_51_P116309 | NM_173001 | Kdm3a     | 104263 | lysine (K)-specific demethylase 3A                | 2.85 | 2.27 | 0.05 |
| A_52_P508397 | AK140938  | 1810026B0 | 69170  | RIKEN cDNA 1810026B05 gene                        | 3.92 | 2.27 | 0.00 |
| A_52_P220176 | NM_015814 | Dkk3      | 50781  | dickkopf homolog 3 ( <i>Xenopus laevis</i> )      | 4.51 | 2.27 | 0.00 |
| A_51_P247249 | NM_009662 | Alox5     | 11689  | arachidonate 5-lipoxygenase                       | 3.71 | 2.27 | 0.01 |
| A_52_P635776 | NM_019693 | Bat1a     | 53817  | HLA-B-associated transcript 1A                    | 4.11 | 2.27 | 0.00 |
| A_51_P115334 | NM_011512 | Surf4     | 20932  | surfeit gene 4                                    | 3.44 | 2.27 | 0.01 |
| A_52_P627816 | NM_019984 | Tgm1      | 21816  | transglutaminase 1, K polypeptide                 | 3.37 | 2.27 | 0.01 |
| A_52_P569178 | AK030115  | Sf3a1     | 67465  | splicing factor 3a, subunit 1                     | 5.12 | 2.27 | 0.00 |
| A_52_P358951 | AK141740  | Zfp26     | 22688  | zinc finger protein 26                            | 5.06 | 2.27 | 0.00 |
| A_52_P134906 | NM_009677 | Ap1g1     | 11765  | adaptor protein complex AP-1, gamma 1 subunit     | 5.39 | 2.27 | 0.00 |
| A_51_P338336 | NM_172552 | Tdg       | 21665  | thymine DNA glycosylase                           | 3.98 | 2.27 | 0.00 |
| A_52_P473172 | NA        | NA        | NA     | NA                                                | 4.40 | 2.26 | 0.00 |
| A_51_P295389 | BC047275  | Chpf2     | 100910 | chondroitin polymerizing factor 2                 | 3.04 | 2.26 | 0.03 |
| A_51_P103659 | NM_009450 | Tubb2a    | 22151  | tubulin, beta 2A                                  | 2.98 | 2.26 | 0.03 |
| A_51_P405135 | XM_896646 | NA        | NA     | NA                                                | 4.05 | 2.26 | 0.00 |
| A_51_P213641 | NM_001035 | Ap2b1     | 71770  | adaptor-related protein complex 2, beta 1 subunit | 4.88 | 2.26 | 0.00 |
| A_51_P464703 | NM_021443 | Ccl8      | 20307  | chemokine (C-C motif) ligand 8                    | 6.01 | 2.26 | 0.00 |
| A_51_P161429 | NM_028965 | Snx11     | 74479  | sorting nexin 11                                  | 6.18 | 2.26 | 0.00 |
| A_52_P636394 | NM_172606 | 6-Mar     | 223455 | membrane-associated ring finger (C3HC4) 6         | 3.35 | 2.26 | 0.01 |
| A_52_P505413 | NM_023663 | Ripk4     | 72388  | receptor-interacting serine-threonine kinase 4    | 7.42 | 2.26 | 0.00 |
| A_51_P198835 | NM_013760 | Dnajb9    | 27362  | Dnaj (Hsp40) homolog, subfamily B, member 9       | 2.85 | 2.26 | 0.05 |
| A_51_P282424 | NM_025456 | Eapp      | 66266  | E2F-associated phosphoprotein                     | 3.71 | 2.26 | 0.01 |
| A_52_P638439 | NM_001037 | NA        | NA     | NA                                                | 4.37 | 2.26 | 0.00 |
| A_52_P589321 | AK169742  | NA        | NA     | NA                                                | 4.26 | 2.26 | 0.00 |
| A_51_P314497 | NM_133700 | Btbd10    | 68815  | BTB (POZ) domain containing 10                    | 4.81 | 2.25 | 0.00 |
| A_52_P614198 | AK039793  | Trav14n-1 | 1E+08  | T cell receptor alpha variable 14N-1              | 4.27 | 2.25 | 0.00 |
| A_51_P176549 | NM_019774 | Akap8     | 56399  | A kinase (PRKA) anchor protein 8                  | 4.41 | 2.25 | 0.00 |
| A_52_P649296 | NM_010937 | Nras      | 18176  | neuroblastoma ras oncogene                        | 7.16 | 2.25 | 0.00 |
| A_52_P537590 | XM_129214 | Pcsk5     | 18552  | proprotein convertase subtilisin/kexin type 5     | 6.26 | 2.25 | 0.00 |
| A_52_P338717 | NM_030064 | Phf23     | 78246  | PHD finger protein 23                             | 4.65 | 2.25 | 0.00 |
| A_51_P327511 | NM_008013 | Fgl2      | 14190  | fibrinogen-like protein 2                         | 3.50 | 2.25 | 0.01 |
| A_52_P309737 | AK137262  | Cdk12     | 69131  | cyclin-dependent kinase 12                        | 3.21 | 2.25 | 0.02 |

|              |           |          |        |                                                                                   |      |      |      |
|--------------|-----------|----------|--------|-----------------------------------------------------------------------------------|------|------|------|
| A_52_P569001 | BC054531  | Atp2a2   | 11938  | ATPase, Ca <sup>++</sup> transporting, cardiac muscle, slow twitch<br>2           | 3.06 | 2.25 | 0.02 |
| A_51_P403273 | NM_025816 | Tax1bp1  | 52440  | Tax1 (human T-cell leukemia virus type I) binding<br>protein 1                    | 2.96 | 2.25 | 0.03 |
| A_51_P511375 | NM_011240 | Ranbp2   | 19386  | RAN binding protein 2                                                             | 4.03 | 2.25 | 0.00 |
| A_51_P390967 | NM_021398 | Slc43a3  | 58207  | solute carrier family 43, member 3                                                | 3.83 | 2.25 | 0.00 |
| A_52_P101221 | NM_153178 | Eif2c2   | 239528 | eukaryotic translation initiation factor 2C, 2                                    | 3.44 | 2.25 | 0.01 |
| A_52_P121703 | AK172237  | Gm3625   | 1E+08  | predicted gene 3625                                                               | 3.47 | 2.25 | 0.01 |
| A_52_P304128 | NM_008608 | Mmp14    | 17387  | matrix metalloproteinase 14 (membrane-inserted)                                   | 3.92 | 2.25 | 0.00 |
| A_51_P223458 | NM_025945 | Polr3d   | 67065  | polymerase (RNA) III (DNA directed) polypeptide D                                 | 4.83 | 2.24 | 0.00 |
| A_51_P510817 | NM_001025 | Camk2d   | 108058 | calcium/calmodulin-dependent protein kinase II, delta                             | 3.58 | 2.24 | 0.01 |
| A_51_P249494 | NM_016807 | Sdcbp    | 53378  | syndecan binding protein                                                          | 4.74 | 2.24 | 0.00 |
| A_51_P258078 | NM_138747 | Nop2     | 110109 | NOP2 nucleolar protein homolog (yeast)                                            | 3.87 | 2.24 | 0.00 |
| A_51_P497061 | NM_026391 | Ppp2r2d  | 52432  | protein phosphatase 2, regulatory subunit B, delta<br>isoform                     | 5.05 | 2.24 | 0.00 |
| A_52_P261322 | NM_198294 | Tanc1    | 66860  | tetratricopeptide repeat, ankyrin repeat and coiled-coil<br>containing 1          | 3.30 | 2.24 | 0.01 |
| A_52_P590740 | BC056465  | Tle3     | 21887  | transducin-like enhancer of split 3, homolog of<br><i>Drosophila</i> E(spl)       | 3.03 | 2.24 | 0.03 |
| A_51_P389531 | NM_019830 | Prmt1    | 15469  | protein arginine N-methyltransferase 1                                            | 4.29 | 2.24 | 0.00 |
| A_51_P219789 | NM_010392 | H2-Q2    | 15013  | histocompatibility 2, Q region locus 2                                            | 4.77 | 2.24 | 0.00 |
| A_52_P592466 | NM_023275 | Rhoj     | 80837  | ras homolog gene family, member J                                                 | 3.74 | 2.24 | 0.01 |
| A_51_P454217 | NM_019408 | Nfkb2    | 18034  | nuclear factor of kappa light polypeptide gene enhancer<br>in B-cells 2, p49/p100 | 2.82 | 2.24 | 0.05 |
| A_51_P290231 | NM_010480 | Hsp90aa1 | 15519  | heat shock protein 90, alpha (cytosolic), class A member<br>1                     | 4.24 | 2.24 | 0.00 |
| A_52_P75465  | NM_025638 | Gdpd1    | 66569  | glycerophosphodiester phosphodiesterase domain<br>containing 1                    | 3.53 | 2.23 | 0.01 |
| A_51_P195506 | NM_007778 | Csf1     | 12977  | colony stimulating factor 1 (macrophage)                                          | 2.94 | 2.23 | 0.03 |
| A_52_P127362 | NM_029478 | Tmem49   | 75909  | transmembrane protein 49                                                          | 3.85 | 2.23 | 0.00 |
| A_52_P681739 | NM_178760 | Gpr107   | 277463 | G protein-coupled receptor 107                                                    | 4.54 | 2.23 | 0.00 |

|              |           |           |        |                                                                                                    |      |      |      |
|--------------|-----------|-----------|--------|----------------------------------------------------------------------------------------------------|------|------|------|
| A_51_P408116 | AK081783  | Il1f9     | 215257 | interleukin 1 family, member 9                                                                     | 4.82 | 2.23 | 0.00 |
| A_51_P455807 | NM_133838 | Ehd4      | 98878  | EH-domain containing 4                                                                             | 3.83 | 2.23 | 0.00 |
| A_52_P560817 | NM_019774 | Akap8     | 56399  | A kinase (PRKA) anchor protein 8                                                                   | 4.00 | 2.23 | 0.00 |
| A_51_P412835 | NM_007829 | Daxx      | 13163  | Fas death domain-associated protein                                                                | 2.75 | 2.23 | 0.06 |
| A_52_P563860 | AK036870  | Nck1      | 17973  | non-catalytic region of tyrosine kinase adaptor protein 1                                          | 2.97 | 2.23 | 0.03 |
| A_52_P254231 | NM_153566 | Yrdc      | 230734 | yrdC domain containing (E.coli)                                                                    | 3.79 | 2.23 | 0.00 |
| A_52_P714621 | AK008061  | 2010003D2 | 76725  | RIKEN cDNA 2010003D24 gene                                                                         | 3.14 | 2.23 | 0.02 |
| A_51_P307964 | NM_010662 | Krt13     | 16663  | keratin 13                                                                                         | 4.47 | 2.23 | 0.00 |
| A_51_P464576 | NM_008943 | Psen1     | 19164  | presenilin 1                                                                                       | 4.68 | 2.23 | 0.00 |
| A_51_P485594 | NM_025729 | Tab3      | 66724  | TGF-beta activated kinase 1/MAP3K7 binding protein 3                                               | 4.00 | 2.23 | 0.00 |
| A_52_P7041   | NM_013614 | Odc1      | 18263  | ornithine decarboxylase, structural 1                                                              | 5.42 | 2.23 | 0.00 |
| A_51_P490997 | M89786    | Gas2l1    | 78926  | growth arrest-specific 2 like 1                                                                    | 3.40 | 2.23 | 0.01 |
| A_51_P146149 | NM_008437 | Napsa     | 16541  | napsin A aspartic peptidase                                                                        | 5.09 | 2.23 | 0.00 |
| A_51_P433615 | NM_183390 | Klhl6     | 239743 | kelch-like 6 (Drosophila)                                                                          | 3.70 | 2.23 | 0.01 |
| A_51_P245368 | NM_011075 | Abcb1b    | 18669  | ATP-binding cassette, sub-family B (MDR/TAP), member 1B                                            | 2.78 | 2.23 | 0.05 |
| A_51_P183685 | NM_033475 | Rab34     | 19376  | RAB34, member of RAS oncogene family                                                               | 3.50 | 2.22 | 0.01 |
| A_51_P332952 | NM_033398 | Jmjd6     | 107817 | jumonji domain containing 6                                                                        | 3.82 | 2.22 | 0.00 |
| A_52_P670255 | NM_008379 | Kpnb1     | 16211  | karyopherin (importin) beta 1                                                                      | 3.61 | 2.22 | 0.01 |
| A_52_P354271 | NM_026655 | 2310057M  | 68277  | RIKEN cDNA 2310057M21 gene                                                                         | 4.10 | 2.22 | 0.00 |
| A_51_P462751 | M79314    | Rap1b     | 215449 | RAS related protein 1b                                                                             | 2.91 | 2.22 | 0.04 |
| A_51_P400784 | NM_001039 | Hnrnpa1   | 15382  | heterogeneous nuclear ribonucleoprotein A1                                                         | 3.33 | 2.22 | 0.01 |
| A_51_P505872 | XM_194424 | NA        | NA     | NA                                                                                                 | 2.92 | 2.22 | 0.04 |
| A_51_P242634 | AF345951  | Dusp16    | 70686  | dual specificity phosphatase 16                                                                    | 4.45 | 2.22 | 0.00 |
| A_51_P211131 | NM_134000 | Traf3ip2  | 103213 | TRAF3 interacting protein 2                                                                        | 3.08 | 2.22 | 0.02 |
| A_52_P192426 | NM_011609 | Tnfrsf1a  | 21937  | tumor necrosis factor receptor superfamily, member 1a                                              | 6.73 | 2.22 | 0.00 |
| A_51_P381440 | NM_009555 | Zfp40     | 22700  | zinc finger protein 40                                                                             | 2.90 | 2.22 | 0.04 |
| A_52_P601497 | AK053591  | Trim39    | 79263  | tripartite motif-containing 39                                                                     | 4.73 | 2.22 | 0.00 |
| A_52_P662025 | NM_144834 | Serpina10 | 217847 | serine (or cysteine) peptidase inhibitor, clade A (alpha-1 antiproteinase, antitrypsin), member 10 | 3.51 | 2.21 | 0.01 |
| A_51_P304469 | NM_011504 | Stxbp3a   | 20912  | syntaxin binding protein 3A                                                                        | 3.71 | 2.21 | 0.01 |

|              |           |           |        |                                                          |      |      |      |
|--------------|-----------|-----------|--------|----------------------------------------------------------|------|------|------|
| A_51_P450924 | NM_025882 | Pole4     | 66979  | polymerase (DNA-directed), epsilon 4 (p12 subunit)       | 4.46 | 2.21 | 0.00 |
| A_52_P140299 | AK049361  | Scfd1     | 76983  | Sec1 family domain containing 1                          | 3.98 | 2.21 | 0.00 |
|              |           |           |        | eukaryotic translation initiation factor 2B, subunit 2   |      |      |      |
| A_51_P229816 | NM_145445 | Eif2b2    | 217715 | beta                                                     | 5.88 | 2.21 | 0.00 |
| A_52_P204023 | AK005009  | Pabpc1    | 18458  | poly(A) binding protein, cytoplasmic 1                   | 6.01 | 2.21 | 0.00 |
| A_52_P583728 | NM_172276 | Sfrs8     | 231769 | splicing factor, arginine/serine-rich 8                  | 2.84 | 2.21 | 0.05 |
| A_52_P223333 | NM_144860 | Mib1      | 225164 | mindbomb homolog 1 (Drosophila)                          | 3.35 | 2.21 | 0.01 |
| A_51_P327963 | NM_172276 | Sfrs8     | 231769 | splicing factor, arginine/serine-rich 8                  | 3.64 | 2.21 | 0.01 |
| A_52_P369415 | NM_207649 | Rcan2     | 53901  | regulator of calcineurin 2                               | 4.52 | 2.21 | 0.00 |
| A_52_P582000 | NA        | NA        | NA     | NA                                                       | 7.18 | 2.21 | 0.00 |
| A_52_P202358 | D13802    | Runx1     | 12394  | runt related transcription factor 1                      | 3.78 | 2.21 | 0.00 |
| A_51_P242967 | NM_021308 | Piwil2    | 57746  | piwi-like homolog 2 (Drosophila)                         | 4.60 | 2.20 | 0.00 |
| A_51_P193813 | NM_010196 | Fga       | 14161  | fibrinogen alpha chain                                   | 3.53 | 2.20 | 0.01 |
| A_52_P519882 | NM_144866 | Etf1      | 225363 | eukaryotic translation termination factor 1              | 3.24 | 2.20 | 0.01 |
| A_51_P124719 | NM_001025 | Ccdc93    | 70829  | coiled-coil domain containing 93                         | 7.02 | 2.20 | 0.00 |
| A_52_P621603 | NM_009450 | Tubb2a    | 22151  | tubulin, beta 2A                                         | 3.36 | 2.20 | 0.01 |
| A_52_P636050 | NM_025663 | Gpatch4   | 66614  | G patch domain containing 4                              | 3.50 | 2.20 | 0.01 |
| A_51_P199314 | AK164568  | Slc38a2   | 67760  | solute carrier family 38, member 2                       | 2.75 | 2.20 | 0.06 |
| A_52_P448648 | NM_021411 | Rab37     | 58222  | RAB37, member of RAS oncogene family                     | 5.01 | 2.20 | 0.00 |
| A_52_P464346 | XM_888686 | NA        | NA     | NA                                                       | 4.00 | 2.20 | 0.00 |
|              |           |           |        | eukaryotic translation initiation factor 2, subunit 2    |      |      |      |
| A_52_P107354 | NM_026030 | Eif2s2    | 67204  | (beta)                                                   | 4.57 | 2.20 | 0.00 |
| A_52_P574214 | NM_028244 | Rrp1b     | 72462  | ribosomal RNA processing 1 homolog B (S. cerevisiae)     | 2.78 | 2.20 | 0.05 |
| A_51_P381150 | NM_199299 | Phf15     | 76901  | PHD finger protein 15                                    | 3.38 | 2.20 | 0.01 |
| A_51_P419246 | AK158034  | 5830416P1 | 381232 | RIKEN cDNA 5830416P10 gene                               | 4.64 | 2.20 | 0.00 |
| A_52_P78033  | AK005166  | Ip6k2     | 76500  | inositol hexaphosphate kinase 2                          | 4.01 | 2.20 | 0.00 |
|              |           |           |        | tetratricopeptide repeat, ankyrin repeat and coiled-coil |      |      |      |
| A_52_P386558 | AK019982  | Tanc2     | 77097  | containing 2                                             | 2.74 | 2.19 | 0.06 |
| A_52_P512817 | NM_025858 | Shisa5    | 66940  | shisa homolog 5 (Xenopus laevis)                         | 4.27 | 2.19 | 0.00 |
| A_52_P83888  | AK053567  | Cflar     | 12633  | CASP8 and FADD-like apoptosis regulator                  | 3.04 | 2.19 | 0.03 |
|              |           |           |        | nuclear factor of kappa light polypeptide gene enhancer  |      |      |      |
| A_51_P235123 | NM_008690 | Nfkbie    | 18037  | in B-cells inhibitor, epsilon                            | 3.04 | 2.19 | 0.02 |

|               |           |           |        |                                                                    |      |      |      |
|---------------|-----------|-----------|--------|--------------------------------------------------------------------|------|------|------|
| A_51_P101196  | NM_011189 | Psme1     | 19186  | proteasome (prosome, macropain) 28 subunit, alpha                  | 5.06 | 2.19 | 0.00 |
| A_52_P463109  | NM_001039 | Nolc1     | 70769  | nucleolar and coiled-body phosphoprotein 1                         | 3.38 | 2.19 | 0.01 |
| A_51_P347547  | NM_013692 | Klf10     | 21847  | Kruppel-like factor 10                                             | 3.38 | 2.19 | 0.01 |
| A_52_P489385  | XM_885832 | NA        | NA     | NA                                                                 | 3.72 | 2.19 | 0.01 |
| A_51_P482925  | NM_175363 | Pphln1    | 223828 | periphilin 1                                                       | 4.67 | 2.19 | 0.00 |
| A_52_P469842  | NM_010786 | Mdm2      | 17246  | transformed mouse 3T3 cell double minute 2                         | 4.49 | 2.18 | 0.00 |
| A_51_P462153  | NM_022314 | Tpm3      | 59069  | tropomyosin 3, gamma                                               | 4.13 | 2.18 | 0.00 |
| A_52_P319591  | NM_017477 | Copg      | 54161  | coatamer protein complex, subunit gamma                            | 3.50 | 2.18 | 0.01 |
| A_52_P41985   | NM_009070 | Rnps1     | 19826  | ribonucleic acid binding protein S1                                | 3.73 | 2.18 | 0.01 |
| A_52_P352541  | AK132930  | Zfp389    | 1E+08  | zinc finger protein 389                                            | 4.66 | 2.18 | 0.00 |
| A_51_P369862  | NM_178772 | Nceh1     | 320024 | arylacetamide deacetylase-like 1                                   | 3.45 | 2.18 | 0.01 |
| A_52_P305851  | NM_025880 | 2410002F2 | 668661 | RIKEN cDNA 2410002F23 gene                                         | 3.61 | 2.18 | 0.01 |
| A_51_P274992  | NM_026578 | Gar1      | 68147  | GAR1 ribonucleoprotein homolog (yeast)                             | 3.98 | 2.18 | 0.00 |
| A_52_P395290  | NM_028814 | 2810403AC | 74200  | RIKEN cDNA 2810403A07 gene                                         | 2.97 | 2.18 | 0.03 |
| A_52_P1034794 | AK017390  | 5430434G  | 171385 | RIKEN cDNA 5430434G16 gene                                         | 2.99 | 2.18 | 0.03 |
| A_51_P305770  | NM_145158 | Emilin2   | 246707 | elastin microfibril interfacier 2                                  | 3.45 | 2.18 | 0.01 |
| A_52_P374897  | NM_009705 | Arg2      | 11847  | arginase type II                                                   | 5.29 | 2.18 | 0.00 |
| A_51_P219291  | NM_172410 | Nup93     | 71805  | nucleoporin 93                                                     | 4.48 | 2.18 | 0.00 |
| A_52_P526677  | BC085163  | Fam120b   | 67544  | family with sequence similarity 120, member B                      | 4.27 | 2.17 | 0.00 |
| A_52_P592120  | NM_027569 | Spag9     | 70834  | sperm associated antigen 9                                         | 2.81 | 2.17 | 0.05 |
| A_52_P287887  | BB142853  | 9930017N2 | 320403 | RIKEN cDNA 9930017N22 gene                                         | 2.88 | 2.17 | 0.04 |
| A_52_P267275  | AK018401  | Alpk1     | 71481  | alpha-kinase 1                                                     | 5.66 | 2.17 | 0.00 |
| A_52_P210893  | NM_019980 | Litaf     | 56722  | LPS-induced TN factor                                              | 3.19 | 2.17 | 0.02 |
| A_52_P50496   | AK168517  | H2-K1     | 14972  | histocompatibility 2, K1, K region                                 | 4.45 | 2.17 | 0.00 |
| A_51_P192429  | NM_021343 | Spata5    | 57815  | spermatogenesis associated 5                                       | 3.43 | 2.17 | 0.01 |
| A_52_P1189114 | NA        | NA        | NA     | NA                                                                 | 4.41 | 2.17 | 0.00 |
| A_52_P350519  | NM_008199 | H2-BI     | 14963  | histocompatibility 2, blastocyst                                   | 3.37 | 2.17 | 0.01 |
| A_52_P390227  | NM_027144 | Arhgef12  | 69632  | Rho guanine nucleotide exchange factor (GEF) 12                    | 4.33 | 2.17 | 0.00 |
| A_52_P643784  | NM_013745 | Nufip1    | 27275  | nuclear fragile X mental retardation protein interacting protein 1 | 3.32 | 2.17 | 0.01 |
| A_52_P603668  | NM_025446 | Aig1      | 66253  | androgen-induced 1                                                 | 4.31 | 2.17 | 0.00 |
| A_52_P20966   | NM_010448 | Hnrnpab   | 15384  | heterogeneous nuclear ribonucleoprotein A/B                        | 3.76 | 2.17 | 0.00 |
| A_52_P18559   | BC019206  | Sbno2     | 216161 | strawberry notch homolog 2 (Drosophila)                            | 3.75 | 2.17 | 0.00 |

|              |           |           |        |                                                                                                                        |  |      |      |      |
|--------------|-----------|-----------|--------|------------------------------------------------------------------------------------------------------------------------|--|------|------|------|
| A_52_P594255 | NA        | NA        | NA     | NA                                                                                                                     |  | 3.32 | 2.17 | 0.01 |
| A_52_P370473 | BC043039  | Msl1      | 74026  | male-specific lethal 1 homolog (Drosophila)                                                                            |  | 4.71 | 2.17 | 0.00 |
| A_51_P467284 | NM_008561 | Mc3r      | 17201  | melanocortin 3 receptor                                                                                                |  | 2.92 | 2.16 | 0.04 |
| A_52_P617963 | NM_178729 | Fbxl5     | 242960 | F-box and leucine-rich repeat protein 5                                                                                |  | 3.01 | 2.16 | 0.03 |
| A_51_P264468 | NM_145975 | Ddx46     | 212880 | DEAD (Asp-Glu-Ala-Asp) box polypeptide 46<br>deoxynucleotidyltransferase, terminal, interacting                        |  | 4.20 | 2.16 | 0.00 |
| A_51_P426633 | NM_153806 | Dnttip2   | 99480  | protein 2                                                                                                              |  | 4.50 | 2.16 | 0.00 |
| A_51_P381260 | NM_008761 | Fxyd5     | 18301  | FXVD domain-containing ion transport regulator 5                                                                       |  | 4.68 | 2.16 | 0.00 |
| A_52_P199776 | BC046478  | Snhg7     | 72091  | small nucleolar RNA host gene (non-protein coding) 7<br>calcium/calmodulin-dependent protein kinase kinase 1,<br>alpha |  | 4.95 | 2.16 | 0.00 |
| A_51_P208330 | NM_018883 | Camkk1    | 55984  | ARV1 homolog (yeast)                                                                                                   |  | 4.83 | 2.16 | 0.00 |
| A_52_P571938 | NM_026855 | Arv1      | 68865  | RAP1 GTPase activating protein 2                                                                                       |  | 2.92 | 2.16 | 0.04 |
| A_52_P39756  | NM_001015 | Rap1gap2  | 380711 | golgi autoantigen, golgin subfamily a, 5                                                                               |  | 5.14 | 2.16 | 0.00 |
| A_52_P426517 | NM_013747 | Golga5    | 27277  | RIKEN cDNA 2310035K24 gene                                                                                             |  | 2.81 | 2.16 | 0.05 |
| A_51_P454002 | NM_027129 | 2310035K2 | 69596  | RIKEN cDNA 5730416F02 gene                                                                                             |  | 3.31 | 2.16 | 0.01 |
| A_52_P110070 | AK017567  | 5730416F0 | 70550  | Harvey rat sarcoma oncogene, subgroup R                                                                                |  | 4.04 | 2.16 | 0.00 |
| A_52_P635182 | NM_009101 | Rras      | 20130  | Jun dimerization protein 2                                                                                             |  | 5.40 | 2.16 | 0.00 |
| A_51_P254646 | NM_030887 | Jdp2      | 81703  | leptin receptor overlapping transcript-like 1<br>adaptor protein, phosphotyrosine interaction, PH                      |  | 4.75 | 2.16 | 0.00 |
| A_51_P482940 | NM_026609 | Leprotl1  | 68192  | domain and leucine zipper containing 1                                                                                 |  | 4.10 | 2.16 | 0.00 |
| A_51_P167857 | NM_145221 | Appl1     | 72993  | pyruvate dehydrogenase kinase, isoenzyme 3                                                                             |  | 3.84 | 2.16 | 0.00 |
| A_52_P99622  | NM_145630 | Pdk3      | 236900 | Rho GDP dissociation inhibitor (GDI) alpha                                                                             |  | 5.34 | 2.16 | 0.00 |
| A_52_P419405 | NM_133796 | Arhgdia   | 192662 | tumor necrosis factor receptor superfamily, member 21                                                                  |  | 4.95 | 2.15 | 0.00 |
| A_51_P168762 | NM_178589 | Tnfrsf21  | 94185  | NA                                                                                                                     |  | 4.13 | 2.15 | 0.00 |
| A_52_P704340 | NA        | NA        | NA     | NA                                                                                                                     |  | 4.81 | 2.15 | 0.00 |
| A_52_P642736 | NA        | NA        | NA     | NA                                                                                                                     |  | 4.60 | 2.15 | 0.00 |
| A_51_P228574 | NM_146214 | Tat       | 234724 | tyrosine aminotransferase                                                                                              |  | 2.99 | 2.15 | 0.03 |
| A_52_P418494 | NM_028447 | Prrc1     | 73137  | proline-rich coiled-coil 1                                                                                             |  | 4.10 | 2.15 | 0.00 |
| A_52_P271528 | NM_019976 | Psrc1     | 56742  | proline/serine-rich coiled-coil 1                                                                                      |  | 4.38 | 2.15 | 0.00 |
| A_52_P374825 | NA        | NA        | NA     | NA                                                                                                                     |  | 3.02 | 2.15 | 0.03 |
| A_52_P448994 | AK086129  | Col4a1    | 12826  | collagen, type IV, alpha 1                                                                                             |  | 3.07 | 2.15 | 0.02 |

|              |           |           |        |                                                                                               |      |      |      |
|--------------|-----------|-----------|--------|-----------------------------------------------------------------------------------------------|------|------|------|
| A_51_P114577 | AK161172  | Parm1     | 231440 | prostate androgen-regulated mucin-like protein 1                                              | 5.67 | 2.15 | 0.00 |
| A_51_P179131 | AK157021  | Vasp      | 22323  | vasodilator-stimulated phosphoprotein                                                         | 4.60 | 2.15 | 0.00 |
| A_51_P487073 | NM_138684 | Wfdc12    | 192200 | WAP four-disulfide core domain 12                                                             | 3.26 | 2.14 | 0.01 |
| A_52_P671661 | NM_026453 | Mak16     | 67920  | MAK16 homolog ( <i>S. cerevisiae</i> )                                                        | 3.39 | 2.14 | 0.01 |
| A_51_P224980 | NM_145972 | BC027231  | 212547 | cDNA sequence BC027231                                                                        | 3.59 | 2.14 | 0.01 |
| A_51_P462047 | NM_172697 | Prpf38a   | 230596 | PRP38 pre-mRNA processing factor 38 (yeast) domain containing A                               | 3.13 | 2.14 | 0.02 |
| A_51_P103007 | NM_008401 | Itgam     | 16409  | integrin alpha M                                                                              | 6.64 | 2.14 | 0.00 |
| A_52_P151974 | AK017285  | Clcn5     | 12728  | chloride channel 5                                                                            | 4.13 | 2.14 | 0.00 |
| A_51_P419263 | NM_026440 | Rnmt      | 67897  | RNA (guanine-7-) methyltransferase                                                            | 4.68 | 2.14 | 0.00 |
| A_52_P183181 | NM_001038 | Adar      | 56417  | adenosine deaminase, RNA-specific                                                             | 3.82 | 2.14 | 0.00 |
| A_51_P242027 | NM_018753 | Ywhab     | 54401  | tyrosine 3-monooxygenase/tryptophan 5-monooxygenase activation protein, beta polypeptide      | 4.62 | 2.14 | 0.00 |
| A_52_P876218 | NM_011406 | Slc8a1    | 20541  | solute carrier family 8 (sodium/calcium exchanger), member 1                                  | 2.98 | 2.14 | 0.03 |
| A_52_P201337 | NM_010900 | Nfatc2ip  | 18020  | nuclear factor of activated T-cells, cytoplasmic, calcineurin-dependent 2 interacting protein | 3.14 | 2.14 | 0.02 |
| A_52_P286543 | NM_019927 | Arih1     | 23806  | ariadne ubiquitin-conjugating enzyme E2 binding protein homolog 1 ( <i>Drosophila</i> )       | 4.09 | 2.14 | 0.00 |
| A_51_P265026 | NM_010872 | Naip2     | 17948  | NLR family, apoptosis inhibitory protein 2                                                    | 3.05 | 2.14 | 0.02 |
| A_51_P175552 | NM_134058 | Pelo      | 105083 | pelota homolog ( <i>Drosophila</i> )                                                          | 4.47 | 2.14 | 0.00 |
| A_52_P132055 | NM_021293 | Cd33      | 12489  | CD33 antigen                                                                                  | 3.87 | 2.14 | 0.00 |
| A_51_P176341 | NM_028769 | Syvn1     | 74126  | synovial apoptosis inhibitor 1, synoviolin                                                    | 3.60 | 2.14 | 0.01 |
| A_51_P316993 | NM_019717 | Atl2      | 56298  | atlastin GTPase 2                                                                             | 2.71 | 2.14 | 0.07 |
| A_51_P394387 | NM_024254 | 2410042D2 | 72425  | RIKEN cDNA 2410042D21 gene                                                                    | 3.28 | 2.13 | 0.01 |
| A_52_P526265 | AK220207  | Wdr73     | 71968  | WD repeat domain 73                                                                           | 5.84 | 2.13 | 0.00 |
| A_52_P566348 | NM_010937 | Nras      | 18176  | neuroblastoma ras oncogene                                                                    | 5.00 | 2.13 | 0.00 |
| A_51_P130803 | BC037041  | Ncrna0008 | 66360  | non-protein coding RNA 81                                                                     | 3.69 | 2.13 | 0.01 |
| A_52_P72497  | NM_133225 | Acbd3     | 170760 | acyl-Coenzyme A binding domain containing 3                                                   | 5.34 | 2.13 | 0.00 |
| A_51_P392518 | NM_145585 | Thumpd1   | 233802 | THUMP domain containing 1                                                                     | 3.98 | 2.13 | 0.00 |
| A_52_P329881 | NM_008929 | Dnajc3    | 1E+08  | Dnal (Hsp40) homolog, subfamily C, member 3                                                   | 4.29 | 2.13 | 0.00 |
| A_51_P517105 | NM_012054 | Aoah      | 27052  | acyloxyacyl hydrolase                                                                         | 4.95 | 2.13 | 0.00 |

|              |           |           |        |                                                                              |      |      |      |
|--------------|-----------|-----------|--------|------------------------------------------------------------------------------|------|------|------|
| A_52_P252305 | NM_028527 | 170004711 | 73385  | RIKEN cDNA 1700047117 gene 1                                                 | 4.15 | 2.13 | 0.00 |
| A_51_P455027 | NM_026932 | Ebna1bp2  | 69072  | EBNA1 binding protein 2                                                      | 4.63 | 2.13 | 0.00 |
| A_52_P311148 | AK012141  | 2410002O2 | 66975  | RIKEN cDNA 2410002O22 gene                                                   | 4.33 | 2.13 | 0.00 |
| A_51_P415225 | NM_009544 | Zfp105    | 22646  | zinc finger protein 105                                                      | 6.50 | 2.13 | 0.00 |
| A_52_P142412 | XM_985015 | 5830409B0 | 76020  | RIKEN cDNA 5830409B07 gene                                                   | 3.10 | 2.13 | 0.02 |
| A_52_P337821 | AK139584  | Eif1a     | 13664  | eukaryotic translation initiation factor 1A                                  | 3.35 | 2.13 | 0.01 |
| A_52_P460393 | NM_146232 | BC014805  | 236149 | cDNA sequence BC014805                                                       | 2.88 | 2.13 | 0.04 |
| A_52_P370402 | NM_019715 | Kcmf1     | 74287  | potassium channel modulatory factor 1                                        | 3.55 | 2.13 | 0.01 |
| A_51_P331841 | NM_175369 | Ccdc122   | 108811 | coiled-coil domain containing 122                                            | 3.89 | 2.13 | 0.00 |
| A_51_P220370 | NM_133751 | NA        | NA     | NA                                                                           | 3.00 | 2.12 | 0.03 |
| A_51_P514584 | NM_001017 | Tbata     | 65971  | thymus, brain and testes associated                                          | 3.28 | 2.12 | 0.01 |
| A_52_P176234 | NM_011240 | Ranbp2    | 19386  | RAN binding protein 2                                                        | 2.85 | 2.12 | 0.05 |
| A_52_P326214 | NM_007803 | Ctnn      | 13043  | cortactin                                                                    | 3.30 | 2.12 | 0.01 |
| A_52_P674847 | NM_013727 | Azi2      | 27215  | 5-azacytidine induced gene 2                                                 | 3.11 | 2.12 | 0.02 |
| A_52_P558411 | NM_010833 | Msn       | 17698  | moesin                                                                       | 4.09 | 2.12 | 0.00 |
| A_51_P293069 | XM_619720 | NA        | NA     | NA                                                                           | 3.23 | 2.12 | 0.02 |
| A_51_P331215 | AK034732  | Prmt6     | 99890  | protein arginine N-methyltransferase 6                                       | 4.72 | 2.12 | 0.00 |
| A_51_P406315 | NM_009962 | Gpr44     | 14764  | G protein-coupled receptor 44                                                | 4.52 | 2.12 | 0.00 |
| A_51_P108891 | NM_013745 | Nufip1    | 27275  | nuclear fragile X mental retardation protein interacting protein 1           | 3.07 | 2.12 | 0.02 |
| A_51_P190277 | NM_053074 | Nup62     | 18226  | nucleoporin 62                                                               | 4.02 | 2.12 | 0.00 |
| A_51_P268934 | NM_153142 | Slc35e4   | 103710 | solute carrier family 35, member E4                                          | 4.31 | 2.12 | 0.00 |
| A_51_P259995 | NM_026453 | Mak16     | 67920  | MAK16 homolog ( <i>S. cerevisiae</i> )                                       | 3.99 | 2.12 | 0.00 |
| A_52_P194929 | XM_109726 | NA        | NA     | NA                                                                           | 3.05 | 2.12 | 0.02 |
| A_51_P419959 | NM_028932 | Eaf1      | 74427  | ELL associated factor 1                                                      | 3.44 | 2.12 | 0.01 |
| A_52_P6070   | NM_027627 | 4931408A0 | 70967  | RIKEN cDNA 4931408A02 gene                                                   | 4.41 | 2.12 | 0.00 |
| A_52_P133594 | NM_009778 | C3        | 12266  | complement component 3                                                       | 4.32 | 2.12 | 0.00 |
| A_51_P191021 | NM_010472 | Agfg1     | 15463  | ArfGAP with FG repeats 1                                                     | 4.06 | 2.12 | 0.00 |
| A_51_P220806 | NM_008110 | Gdf9      | 14566  | growth differentiation factor 9                                              | 5.42 | 2.12 | 0.00 |
| A_52_P19016  | NM_016680 | Sfrs16    | 53609  | splicing factor, arginine/serine-rich 16                                     | 3.24 | 2.11 | 0.01 |
| A_52_P106739 | NM_145975 | Ddx46     | 212880 | DEAD (Asp-Glu-Ala-Asp) box polypeptide 46                                    | 4.68 | 2.11 | 0.00 |
| A_51_P516625 | NM_008090 | Gata2     | 14461  | GATA binding protein 2                                                       | 6.27 | 2.11 | 0.00 |
| A_52_P565396 | XM_992322 | LOC676708 | 676708 | similar to H-2 class I histocompatibility antigen, L-D alpha chain precursor | 3.74 | 2.11 | 0.01 |



|              |           |           |        |                                                                                                                                   |      |      |      |
|--------------|-----------|-----------|--------|-----------------------------------------------------------------------------------------------------------------------------------|------|------|------|
| A_51_P276652 | NM_029397 | Rbm12     | 75710  | RNA binding motif protein 12                                                                                                      | 3.00 | 2.11 | 0.03 |
| A_51_P178411 | NA        | NA        | NA     | NA                                                                                                                                | 3.46 | 2.11 | 0.01 |
| A_51_P352875 | NM_010696 | Lcp2      | 16822  | lymphocyte cytosolic protein 2                                                                                                    | 3.61 | 2.11 | 0.01 |
| A_51_P390387 | AK086718  | Zmynd19   | 67187  | zinc finger, MYND domain containing 19                                                                                            | 5.71 | 2.11 | 0.00 |
| A_52_P641922 | NM_172501 | Nhlrc3    | 212114 | NHL repeat containing 3                                                                                                           | 3.93 | 2.11 | 0.00 |
| A_52_P660142 | XM_484715 | Sft2d3    | 67158  | SFT2 domain containing 3                                                                                                          | 3.06 | 2.11 | 0.02 |
| A_51_P192817 | NM_026816 | Gtf2f2    | 68705  | general transcription factor IIF, polypeptide 2                                                                                   | 4.10 | 2.11 | 0.00 |
| A_51_P433000 | AK008733  | Chmp4c    | 66371  | chromatin modifying protein 4C                                                                                                    | 4.03 | 2.11 | 0.00 |
| A_52_P203031 | NM_024457 | Rap1b     | 215449 | RAS related protein 1b                                                                                                            | 4.14 | 2.11 | 0.00 |
| A_52_P451485 | NM_172496 | Cobl      | 12808  | cordon-bleu                                                                                                                       | 3.12 | 2.11 | 0.02 |
| A_51_P323531 | XM_133423 | NA        | NA     | NA                                                                                                                                | 2.93 | 2.11 | 0.04 |
| A_52_P3276   | NM_027519 | 633040611 | 70717  | RIKEN cDNA 6330406115 gene<br>protein phosphatase 2 (formerly 2A), regulatory subunit                                             | 4.34 | 2.10 | 0.00 |
| A_52_P206627 | NM_028032 | Ppp2r2a   | 71978  | B (PR 52), alpha isoform                                                                                                          | 2.87 | 2.10 | 0.05 |
| A_51_P225781 | NM_173767 | Insc      | 233752 | inscuteable homolog (Drosophila)                                                                                                  | 3.16 | 2.10 | 0.02 |
| A_52_P500979 | NM_013628 | Pcsk1     | 18548  | proprotein convertase subtilisin/kexin type 1                                                                                     | 2.87 | 2.10 | 0.04 |
| A_51_P507801 | NM_028784 | F13a1     | 74145  | coagulation factor XIII, A1 subunit                                                                                               | 3.38 | 2.10 | 0.01 |
| A_52_P2923   | NM_019581 | Gtpbp2    | 56055  | GTP binding protein 2                                                                                                             | 4.93 | 2.10 | 0.00 |
| A_52_P135707 | NM_013497 | Creb3     | 12913  | cAMP responsive element binding protein 3                                                                                         | 3.25 | 2.10 | 0.01 |
| A_52_P488220 | NM_009007 | Rac1      | 19353  | RAS-related C3 botulinum substrate 1                                                                                              | 3.75 | 2.10 | 0.01 |
| A_52_P522023 | AK146582  | Alkbh1    | 211064 | alkB, alkylation repair homolog 1 (E. coli)                                                                                       | 4.83 | 2.10 | 0.00 |
| A_52_P32249  | NM_019464 | Sh3glb1   | 54673  | SH3-domain GRB2-like B1 (endophilin)                                                                                              | 3.54 | 2.10 | 0.01 |
| A_52_P147487 | NM_007731 | Col13a1   | 12817  | collagen, type XIII, alpha 1                                                                                                      | 5.40 | 2.10 | 0.00 |
| A_51_P213766 | NM_013785 | Ip6k1     | 27399  | inositol hexaphosphate kinase 1                                                                                                   | 3.21 | 2.09 | 0.02 |
| A_52_P109740 | NA        | NA        | NA     | NA                                                                                                                                | 2.75 | 2.09 | 0.06 |
| A_51_P346453 | NM_153570 | Noc4l     | 100608 | nucleolar complex associated 4 homolog (S. cerevisiae)                                                                            | 4.69 | 2.09 | 0.00 |
| A_52_P168962 | NM_007646 | Cd38      | 12494  | CD38 antigen                                                                                                                      | 4.52 | 2.09 | 0.00 |
| A_51_P511529 | NM_175311 | Zfp513    | 101023 | zinc finger protein 513                                                                                                           | 4.58 | 2.09 | 0.00 |
| A_52_P171791 | NM_001031 | Smg1      | 233789 | SMG1 homolog, phosphatidylinositol 3-kinase-related<br>kinase (C. elegans)<br>vesicle transport through interaction with t-SNAREs | 3.05 | 2.09 | 0.02 |
| A_52_P283087 | AK015010  | Vti1a     | 53611  | homolog 1A (yeast)                                                                                                                | 3.58 | 2.09 | 0.01 |
| A_52_P110877 | NM_011853 | NA        | NA     | NA                                                                                                                                | 3.68 | 2.09 | 0.01 |

|              |           |         |        |                                                           |      |      |      |
|--------------|-----------|---------|--------|-----------------------------------------------------------|------|------|------|
| A_51_P459340 | NM_025755 | Pacrgl  | 66768  | PARK2 co-regulated-like                                   | 4.80 | 2.09 | 0.00 |
| A_51_P271563 | NM_008442 | Kif2a   | 16563  | kinesin family member 2A                                  | 3.50 | 2.08 | 0.01 |
| A_51_P328613 | NM_010188 | Fcgr3   | 14131  | Fc receptor, IgG, low affinity III                        | 2.79 | 2.08 | 0.05 |
| A_51_P331212 | AK034732  | Prmt6   | 99890  | protein arginine N-methyltransferase 6                    | 3.00 | 2.08 | 0.03 |
| A_51_P443364 | NM_134048 | Cbll1   | 104836 | Casitas B-lineage lymphoma-like 1                         | 3.41 | 2.08 | 0.01 |
| A_51_P176138 | BC052229  | Fam195b | 192173 | family with sequence similarity 195, member B             | 2.84 | 2.08 | 0.05 |
| A_52_P44     | BC040369  | Bcl2l2  | 12050  | BCL2-like 2                                               | 3.46 | 2.08 | 0.01 |
| A_52_P652164 | NM_021305 | Sec61a2 | 57743  | Sec61, alpha subunit 2 ( <i>S. cerevisiae</i> )           | 3.98 | 2.08 | 0.00 |
| A_51_P306658 | NM_133939 | Naa38   | 76522  | N(alpha)-acetyltransferase 38, NatC auxiliary subunit     | 3.85 | 2.08 | 0.00 |
| A_52_P512201 | NM_175397 | Sp110   | 109032 | Sp110 nuclear body protein                                | 3.39 | 2.08 | 0.01 |
| A_52_P335478 | NM_025882 | Pole4   | 66979  | polymerase (DNA-directed), epsilon 4 (p12 subunit)        | 5.74 | 2.08 | 0.00 |
| A_51_P121031 | NM_175188 | 1-Mar   | 72925  | membrane-associated ring finger (C3HC4) 1                 | 3.49 | 2.08 | 0.01 |
| A_52_P440508 | AK041801  | NA      | NA     | NA                                                        | 2.79 | 2.08 | 0.05 |
| A_51_P407227 | NM_153175 | Gimap6  | 231931 | GTPase, IMAP family member 6                              | 3.08 | 2.08 | 0.02 |
| A_51_P362531 | NM_144835 | Heatr1  | 217995 | HEAT repeat containing 1                                  | 3.83 | 2.08 | 0.00 |
| A_51_P338040 | NM_146168 | Vopp1   | 232023 | vesicular, overexpressed in cancer, prosurvival protein 1 | 3.46 | 2.08 | 0.01 |
| A_51_P324814 | NM_010664 | Krt18   | 16668  | keratin 18                                                | 4.24 | 2.08 | 0.00 |
| A_52_P456617 | NM_001039 | Plekhm3 | 241075 | pleckstrin homology domain containing, family M, member 3 | 3.36 | 2.08 | 0.01 |
| A_52_P373973 | NM_001039 | Mex3c   | 240396 | mex3 homolog C ( <i>C. elegans</i> )                      | 2.98 | 2.08 | 0.03 |
| A_51_P506792 | NM_001025 | Tpd52   | 21985  | tumor protein D52                                         | 5.74 | 2.08 | 0.00 |
| A_51_P266668 | NM_175403 | Mlec    | 109154 | malectin                                                  | 4.66 | 2.08 | 0.00 |
| A_52_P659917 | NM_173423 | Fem1c   | 240263 | fem-1 homolog c ( <i>C.elegans</i> )                      | 4.18 | 2.08 | 0.00 |
| A_51_P496273 | NM_023502 | Elf2    | 69257  | E74-like factor 2                                         | 3.11 | 2.07 | 0.02 |
| A_51_P310773 | BC004022  | N4bp1   | 80750  | NEDD4 binding protein 1                                   | 3.79 | 2.07 | 0.00 |
| A_51_P193894 | NM_027375 | Gcc2    | 70297  | GRIP and coiled-coil domain containing 2                  | 2.90 | 2.07 | 0.04 |
| A_51_P354572 | NM_198163 | Rab35   | 77407  | RAB35, member RAS oncogene family                         | 3.45 | 2.07 | 0.01 |
| A_51_P108108 | NM_153074 | Lrrc25  | 211228 | leucine rich repeat containing 25                         | 3.46 | 2.07 | 0.01 |
| A_51_P216905 | NM_007438 | Aldoa   | 11674  | aldolase A, fructose-bisphosphate                         | 3.37 | 2.07 | 0.01 |
| A_51_P359259 | NM_027569 | Spag9   | 70834  | sperm associated antigen 9                                | 2.79 | 2.07 | 0.05 |

|               |           |          |        |                                                                                        |      |      |      |
|---------------|-----------|----------|--------|----------------------------------------------------------------------------------------|------|------|------|
| A_51_P389814  | NM_011349 | Sema3f   | 20350  | sema domain, immunoglobulin domain (Ig), short basic domain, secreted, (semaphorin) 3F | 3.27 | 2.07 | 0.01 |
| A_51_P136845  | NM_027804 | Usp19    | 71472  | ubiquitin specific peptidase 19                                                        | 5.79 | 2.07 | 0.00 |
| A_52_P273929  | NM_025301 | Mrpl17   | 27397  | mitochondrial ribosomal protein L17                                                    | 3.32 | 2.07 | 0.01 |
| A_51_P416556  | NM_026155 | Ssr3     | 67437  | signal sequence receptor, gamma                                                        | 4.14 | 2.07 | 0.00 |
| A_52_P556281  | BC048176  | G3bp2    | 23881  | GTPase activating protein (SH3 domain) binding protein 2                               | 3.52 | 2.07 | 0.01 |
| A_52_P299283  | NA        | NA       | NA     | NA                                                                                     | 3.48 | 2.07 | 0.01 |
| A_52_P573366  | NM_178089 | Hnrnpul1 | 232989 | heterogeneous nuclear ribonucleoprotein U-like 1                                       | 3.41 | 2.07 | 0.01 |
| A_51_P292116  | NM_010492 | Ica1     | 15893  | islet cell autoantigen 1                                                               | 3.25 | 2.07 | 0.01 |
| A_52_P254275  | NM_144515 | Zfp52    | 22710  | zinc finger protein 52                                                                 | 3.62 | 2.07 | 0.01 |
| A_51_P324583  | BC060071  | NA       | NA     | NA                                                                                     | 3.52 | 2.07 | 0.01 |
| A_51_P235117  | NM_144530 | Zc3h11a  | 70579  | zinc finger CCCH type containing 11A                                                   | 2.82 | 2.07 | 0.05 |
| A_51_P125117  | NM_025390 | Pop4     | 66161  | processing of precursor 4, ribonuclease P/MRP family, (S. cerevisiae)                  | 3.73 | 2.06 | 0.01 |
| A_52_P908952  | XM_979235 | EG665756 | 665756 | predicted gene, EG665756                                                               | 4.76 | 2.06 | 0.00 |
| A_51_P118945  | AF054581  | Il2ra    | 16184  | interleukin 2 receptor, alpha chain                                                    | 5.03 | 2.06 | 0.00 |
| A_51_P473953  | XM_887737 | NA       | NA     | NA                                                                                     | 3.49 | 2.06 | 0.01 |
| A_52_P583399  | NA        | NA       | NA     | NA                                                                                     | 2.99 | 2.06 | 0.03 |
| A_52_P512553  | AK131109  | Atg16l2  | 73683  | autophagy related 16 like 2 (S. cerevisiae)                                            | 3.07 | 2.06 | 0.02 |
| A_51_P506236  | NM_016691 | Clcn5    | 12728  | chloride channel 5                                                                     | 4.28 | 2.06 | 0.00 |
| A_51_P259459  | NM_010908 | Nfkbib   | 18036  | nuclear factor of kappa light polypeptide gene enhancer in B-cells inhibitor, beta     | 3.20 | 2.06 | 0.02 |
| A_52_P1077539 | NA        | NA       | NA     | NA                                                                                     | 2.94 | 2.06 | 0.04 |
| A_51_P311125  | NM_024250 | Phf10    | 72057  | PHD finger protein 10                                                                  | 4.15 | 2.06 | 0.00 |
| A_52_P542912  | NM_144846 | Fam49b   | 223601 | family with sequence similarity 49, member B                                           | 3.70 | 2.06 | 0.01 |
| A_51_P490023  | NM_009450 | Tubb2a   | 22151  | tubulin, beta 2A                                                                       | 3.03 | 2.06 | 0.03 |
| A_51_P307150  | NM_008324 | Ido1     | 15930  | indoleamine 2,3-dioxygenase 1                                                          | 3.91 | 2.06 | 0.00 |
| A_52_P480301  | NM_029012 | Sppl3    | 74585  | signal peptide peptidase 3                                                             | 3.29 | 2.06 | 0.01 |
| A_52_P15616   | BC028949  | Gm9222   | 668525 | predicted gene 9222                                                                    | 2.82 | 2.06 | 0.05 |
| A_52_P690855  | NM_199312 | BC051628 | 332713 | cDNA sequence BC051628                                                                 | 4.29 | 2.06 | 0.00 |
| A_51_P331805  | NM_146188 | Kctd15   | 233107 | potassium channel tetramerisation domain containing 15                                 | 5.49 | 2.06 | 0.00 |

|              |           |          |        |                                                                                     |      |      |      |
|--------------|-----------|----------|--------|-------------------------------------------------------------------------------------|------|------|------|
| A_52_P522210 | NM_183428 | Epb4.1   | 269587 | erythrocyte protein band 4.1                                                        | 3.36 | 2.06 | 0.01 |
| A_51_P427530 | NM_025700 | Pgm1     | 66681  | phosphoglucomutase 1                                                                | 3.02 | 2.06 | 0.03 |
| A_51_P184773 | NM_011715 | Wdr1     | 22388  | WD repeat domain 1                                                                  | 3.66 | 2.05 | 0.01 |
| A_51_P227929 | NM_199032 | Cep135   | 381644 | centrosomal protein 135                                                             | 3.30 | 2.05 | 0.01 |
| A_51_P300281 | NM_009898 | Coro1a   | 12721  | coronin, actin binding protein 1A                                                   | 3.71 | 2.05 | 0.01 |
| A_52_P446181 | NM_175163 | Zfp689   | 71131  | zinc finger protein 689                                                             | 4.59 | 2.05 | 0.00 |
| A_52_P438919 | NM_001011 | Olfir524 | 258055 | olfactory receptor 524                                                              | 4.50 | 2.05 | 0.00 |
| A_52_P299771 | NM_007535 | Bcl2a1c  | 12046  | B-cell leukemia/lymphoma 2 related protein A1c                                      | 3.57 | 2.05 | 0.01 |
| A_51_P355987 | NM_178029 | Setd1a   | 233904 | SET domain containing 1A                                                            | 4.47 | 2.05 | 0.00 |
| A_51_P453010 | NM_026758 | Mphosph6 | 68533  | M phase phosphoprotein 6                                                            | 3.10 | 2.05 | 0.02 |
| A_52_P385615 | NM_026043 | Rnpc3    | 67225  | RNA-binding region (RNP1, RRM) containing 3                                         | 2.92 | 2.05 | 0.04 |
| A_51_P516756 | NM_010434 | Hipk3    | 15259  | homeodomain interacting protein kinase 3                                            | 3.10 | 2.05 | 0.02 |
| A_52_P500488 | BC052715  | Lars     | 107045 | leucyl-tRNA synthetase                                                              | 2.97 | 2.05 | 0.03 |
| A_51_P196629 | XM_283903 | Fam102b  | 329739 | family with sequence similarity 102, member B                                       | 3.49 | 2.05 | 0.01 |
| A_51_P116616 | NM_019869 | Rbm14    | 56275  | RNA binding motif protein 14                                                        | 2.76 | 2.05 | 0.06 |
| A_51_P146753 | NM_007781 | Csf2rb2  | 12984  | colony stimulating factor 2 receptor, beta 2, low-affinity (granulocyte-macrophage) | 3.68 | 2.05 | 0.01 |
| A_52_P528312 | NA        | NA       | NA     | NA                                                                                  | 3.65 | 2.05 | 0.01 |
| A_51_P120948 | NM_028288 | Cul4b    | 72584  | cullin 4B                                                                           | 3.24 | 2.05 | 0.01 |
| A_51_P359017 | NM_011841 | Mapk7    | 23939  | mitogen-activated protein kinase 7                                                  | 3.58 | 2.05 | 0.01 |
| A_52_P574653 | NM_007544 | Bid      | 12122  | BH3 interacting domain death agonist                                                | 3.94 | 2.05 | 0.00 |
| A_52_P654161 | NM_009546 | Trim25   | 217069 | tripartite motif-containing 25                                                      | 4.57 | 2.05 | 0.00 |
| A_52_P12869  | AB029144  | Psm4     | 19185  | proteasome (prosome, macropain) 26S subunit, non-ATPase, 4                          | 3.85 | 2.05 | 0.00 |
| A_52_P73307  | NM_134092 | Mtbp     | 105837 | Mdm2, transformed 3T3 cell double minute p53 binding protein                        | 2.90 | 2.04 | 0.04 |
| A_51_P517695 | NM_008530 | Ly6f     | 17071  | lymphocyte antigen 6 complex, locus F                                               | 6.36 | 2.04 | 0.00 |
| A_52_P331901 | NM_023815 | Trp53rk  | 76367  | transformation related protein 53 regulating kinase                                 | 4.14 | 2.04 | 0.00 |
| A_51_P121793 | NM_008891 | Pnn      | 18949  | pinin                                                                               | 3.37 | 2.04 | 0.01 |
| A_51_P501453 | NM_022430 | Ms4a8a   | 64381  | membrane-spanning 4-domains, subfamily A, member 8A                                 | 2.85 | 2.04 | 0.05 |
| A_51_P494006 | BC075621  | Rbm16    | 106583 | RNA binding motif protein 16                                                        | 3.56 | 2.04 | 0.01 |

|              |           |           |        |                                                                                         |      |      |      |
|--------------|-----------|-----------|--------|-----------------------------------------------------------------------------------------|------|------|------|
| A_51_P433960 | NM_011890 | Sgcb      | 24051  | sarcoglycan, beta (dystrophin-associated glycoprotein)                                  | 3.92 | 2.04 | 0.00 |
| A_51_P437847 | BC087623  | Kctd1     | 106931 | potassium channel tetramerisation domain containing 1                                   | 3.43 | 2.04 | 0.01 |
| A_51_P473252 | NM_011777 | Zyx       | 22793  | zyxin                                                                                   | 3.14 | 2.04 | 0.02 |
| A_51_P312310 | NM_134092 | Mtbp      | 105837 | Mdm2, transformed 3T3 cell double minute p53 binding protein                            | 2.94 | 2.04 | 0.04 |
| A_51_P172589 | AK004627  | 1200007C1 | 74119  | RIKEN cDNA 1200007C13 gene                                                              | 4.86 | 2.04 | 0.00 |
| A_52_P281679 | AK004214  | Gmeb1     | 56809  | glucocorticoid modulatory element binding protein 1                                     | 2.87 | 2.03 | 0.04 |
| A_51_P475672 | AK137576  | Slc7a1    | 11987  | solute carrier family 7 (cationic amino acid transporter, y+ system), member 1          | 3.37 | 2.03 | 0.01 |
| A_51_P455632 | NM_172675 | Stx16     | 228960 | syntaxin 16                                                                             | 3.07 | 2.03 | 0.02 |
| A_51_P238357 | NM_019549 | Plek      | 56193  | pleckstrin                                                                              | 3.82 | 2.03 | 0.00 |
| A_52_P597800 | NM_007961 | Etv6      | 14011  | ets variant gene 6 (TEL oncogene)                                                       | 3.54 | 2.03 | 0.01 |
| A_51_P395743 | NM_029773 | Spopl     | 76857  | speckle-type POZ protein-like                                                           | 4.20 | 2.03 | 0.00 |
| A_52_P363216 | NM_133219 | Gcnt2     | 14538  | glucosaminyl (N-acetyl) transferase 2, I-branching enzyme                               | 2.86 | 2.03 | 0.05 |
| A_51_P355852 | NM_008856 | Prkch     | 18755  | protein kinase C, eta                                                                   | 3.25 | 2.03 | 0.01 |
| A_51_P419147 | NM_134152 | Lpxn      | 107321 | leupaxin                                                                                | 4.72 | 2.03 | 0.00 |
| A_52_P527874 | NM_199447 | Rrp12     | 107094 | ribosomal RNA processing 12 homolog ( <i>S. cerevisiae</i> )                            | 3.25 | 2.03 | 0.01 |
| A_52_P193657 | NM_175026 | Pyhin1    | 236312 | pyrin and HIN domain family, member 1                                                   | 4.04 | 2.03 | 0.00 |
| A_52_P370560 | NM_011690 | Vars      | 22321  | valyl-tRNA synthetase                                                                   | 2.87 | 2.03 | 0.04 |
| A_51_P400659 | NM_007530 | Bcap29    | 12033  | B-cell receptor-associated protein 29                                                   | 3.87 | 2.03 | 0.00 |
| A_52_P556290 | NM_019927 | Arih1     | 23806  | ariadne ubiquitin-conjugating enzyme E2 binding protein homolog 1 ( <i>Drosophila</i> ) | 2.92 | 2.03 | 0.04 |
| A_52_P329367 | NM_001025 | Chka      | 12660  | choline kinase alpha                                                                    | 2.74 | 2.03 | 0.07 |
| A_51_P114941 | NM_007819 | Cyp3a13   | 13113  | cytochrome P450, family 3, subfamily a, polypeptide 13                                  | 3.15 | 2.03 | 0.02 |
| A_52_P535907 | NM_145943 | BC031781  | 208768 | cDNA sequence BC031781                                                                  | 2.86 | 2.02 | 0.05 |
| A_52_P859659 | AK051538  | NA        | NA     | NA                                                                                      | 3.54 | 2.02 | 0.01 |
| A_51_P378009 | NM_025505 | Blzf1     | 66352  | basic leucine zipper nuclear factor 1                                                   | 4.24 | 2.02 | 0.00 |

|              |           |          |        |                                                                                               |      |      |      |
|--------------|-----------|----------|--------|-----------------------------------------------------------------------------------------------|------|------|------|
| A_52_P229709 | NM_025356 | Ube2d3   | 66105  | ubiquitin-conjugating enzyme E2D 3 (UBC4/5 homolog, yeast)                                    | 3.18 | 2.02 | 0.02 |
| A_52_P309223 | AK083420  | Gpbp1    | 73274  | GC-rich promoter binding protein 1                                                            | 3.57 | 2.02 | 0.01 |
| A_51_P282268 | NM_178392 | Snapc1   | 75627  | small nuclear RNA activating complex, polypeptide 1                                           | 2.80 | 2.02 | 0.05 |
| A_52_P483305 | NM_145374 | Mios     | 252875 | missing oocyte, meiosis regulator, homolog (Drosophila)                                       | 2.98 | 2.02 | 0.03 |
| A_51_P445392 | NM_175127 | Fbxo28   | 67948  | F-box protein 28                                                                              | 3.31 | 2.02 | 0.01 |
| A_52_P622397 | NM_177005 | Glt1d1   | 319804 | glycosyltransferase 1 domain containing 1                                                     | 3.53 | 2.02 | 0.01 |
| A_52_P274315 | NM_175335 | Gtf2a1   | 83602  | general transcription factor II A, 1                                                          | 4.18 | 2.02 | 0.00 |
| A_51_P417107 | NM_009558 | Zfp51    | 22709  | zinc finger protein 51                                                                        | 4.20 | 2.02 | 0.00 |
| A_52_P658465 | XM_001004 | NA       | NA     | NA                                                                                            | 4.75 | 2.02 | 0.00 |
| A_51_P394065 | NM_007840 | Ddx5     | 13207  | DEAD (Asp-Glu-Ala-Asp) box polypeptide 5                                                      | 3.93 | 2.02 | 0.00 |
| A_51_P330125 | NM_029688 | Srxn1    | 76650  | sulfiredoxin 1 homolog (S. cerevisiae)                                                        | 2.88 | 2.02 | 0.04 |
| A_52_P406216 | NA        | NA       | NA     | NA                                                                                            | 5.62 | 2.02 | 0.00 |
| A_52_P676913 | NM_010817 | Psmc7    | 17463  | proteasome (prosome, macropain) 26S subunit, non-ATPase, 7                                    | 3.88 | 2.02 | 0.00 |
| A_51_P252363 | NM_133887 | Stx12    | 100226 | syntaxin 12                                                                                   | 4.53 | 2.02 | 0.00 |
| A_52_P403827 | NM_172829 | St6gal2  | 240119 | beta galactoside alpha 2,6 sialyltransferase 2                                                | 4.19 | 2.01 | 0.00 |
| A_52_P343856 | NM_178661 | Creb3l2  | 208647 | cAMP responsive element binding protein 3-like 2                                              | 3.59 | 2.01 | 0.01 |
| A_52_P451796 | NM_021890 | Fads3    | 60527  | fatty acid desaturase 3                                                                       | 4.83 | 2.01 | 0.00 |
| A_52_P163766 | NM_011596 | Atp6v0a2 | 21871  | ATPase, H <sup>+</sup> transporting, lysosomal V0 subunit A2                                  | 3.95 | 2.01 | 0.00 |
| A_51_P479390 | AK007436  | Adamts9  | 101401 | a disintegrin-like and metallopeptidase (reprolysin type) with thrombospondin type 1 motif, 9 | 2.98 | 2.01 | 0.03 |
| A_51_P186476 | NM_013612 | Slc11a1  | 18173  | solute carrier family 11 (proton-coupled divalent metal ion transporters), member 1           | 2.97 | 2.01 | 0.03 |
| A_52_P211393 | BC059278  | Ptpn11   | 19247  | protein tyrosine phosphatase, non-receptor type 11                                            | 2.92 | 2.01 | 0.04 |
| A_51_P433338 | NM_053180 | Cdk20    | 105278 | cyclin-dependent kinase 20                                                                    | 3.55 | 2.01 | 0.01 |
| A_51_P296036 | NM_144847 | Nrbp2    | 223649 | nuclear receptor binding protein 2                                                            | 4.87 | 2.01 | 0.00 |
| A_51_P385718 | NM_026862 | Cd177    | 68891  | CD177 antigen                                                                                 | 2.91 | 2.01 | 0.04 |
| A_52_P48546  | NM_026259 | Rnf41    | 67588  | ring finger protein 41                                                                        | 4.05 | 2.01 | 0.00 |

|              |           |                 |        |                                                       |      |      |      |
|--------------|-----------|-----------------|--------|-------------------------------------------------------|------|------|------|
| A_52_P14666  | XM_888940 | Hnrnpa1l2       | 544954 | heterogeneous nuclear ribonucleoprotein A1-like 2     | 2.71 | 2.01 | 0.07 |
| A_51_P390522 | NM_133724 | Cno             | 117197 | cappuccino                                            | 4.13 | 2.01 | 0.00 |
| A_51_P433237 | NM_007665 | Cdh3            | 12560  | cadherin 3                                            | 3.81 | 2.01 | 0.00 |
| A_51_P190499 | NM_019909 | NA              | NA     | NA                                                    | 4.31 | 2.01 | 0.00 |
| A_51_P214679 | BC098509  | 3110003A1       | 73112  | RIKEN cDNA 3110003A17 gene                            | 2.76 | 2.01 | 0.06 |
| A_51_P393524 | NM_009070 | Rnps1           | 19826  | ribonucleic acid binding protein S1                   | 3.85 | 2.01 | 0.00 |
| A_52_P356204 | NM_181547 | Nostrin         | 329416 | nitric oxide synthase trafficker                      | 3.04 | 2.01 | 0.02 |
| A_51_P468126 | NM_024468 | Trim39          | 79263  | tripartite motif-containing 39                        | 5.29 | 2.01 | 0.00 |
|              |           |                 |        | eukaryotic translation initiation factor 4E binding   |      |      |      |
| A_51_P330428 | NM_007918 | Eif4ebp1        | 13685  | protein 1                                             | 5.30 | 2.01 | 0.00 |
| A_52_P671543 | NM_008895 | Pomc            | 18976  | pro-opiomelanocortin-alpha                            | 5.71 | 2.01 | 0.00 |
| A_52_P226348 | AK089514  | F730043M:320046 |        | RIKEN cDNA F730043M19 gene                            | 5.39 | 2.01 | 0.00 |
| A_51_P464630 | NM_011233 | Rad17           | 19356  | RAD17 homolog (S. pombe)                              | 5.73 | 2.01 | 0.00 |
| A_51_P515585 | NM_026017 | Dullard         | 67181  | Dullard homolog (Xenopus laevis)                      | 4.54 | 2.01 | 0.00 |
| A_52_P631860 | NA        | NA              | NA     | NA                                                    | 4.60 | 2.00 | 0.00 |
| A_51_P322972 | NM_145419 | Hkdc1           | 216019 | hexokinase domain containing 1                        | 3.06 | 2.00 | 0.02 |
| A_51_P190667 | NM_130860 | Cdk9            | 107951 | cyclin-dependent kinase 9 (CDC2-related kinase)       | 4.41 | 2.00 | 0.00 |
| A_52_P94150  | AK015074  | NA              | NA     | NA                                                    | 6.19 | 2.00 | 0.00 |
| A_52_P630059 | AJ250687  | Bag3            | 29810  | BCL2-associated athanogene 3                          | 3.73 | 2.00 | 0.01 |
| A_51_P337246 | NM_023130 | Raly            | 19383  | hnRNP-associated with lethal yellow                   | 3.06 | 2.00 | 0.02 |
| A_52_P12283  | NM_026201 | Ccar1           | 67500  | cell division cycle and apoptosis regulator 1         | 3.25 | 2.00 | 0.01 |
| A_51_P325223 | NM_011698 | Lin7b           | 22342  | lin-7 homolog B (C. elegans)                          | 4.14 | 2.00 | 0.00 |
|              |           |                 |        |                                                       |      |      |      |
| A_51_P304437 | NM_173019 | Pfkfb4          | 270198 | 6-phosphofructo-2-kinase/fructose-2,6-biphosphatase 4 | 3.41 | 2.00 | 0.01 |
| A_52_P337740 | AK030611  | NA              | NA     | NA                                                    | 3.07 | 2.00 | 0.02 |
| A_52_P149163 | AK146784  | Mark4           | 232944 | MAP/microtubule affinity-regulating kinase 4          | 3.99 | 2.00 | 0.00 |
| A_52_P818682 | AK020546  | 9530006C2       | 77393  | RIKEN cDNA 9530006C21 gene                            | 3.61 | 2.00 | 0.01 |
| A_52_P452364 | NM_023585 | Ube2v2          | 70620  | ubiquitin-conjugating enzyme E2 variant 2             | 5.90 | 2.00 | 0.00 |
| A_51_P281134 | AB019028  | Med14           | 26896  | mediator complex subunit 14                           | 3.88 | 2.00 | 0.00 |
| A_52_P578538 | NM_001039 | NA              | NA     | NA                                                    | 3.37 | 2.00 | 0.01 |
| A_51_P185757 | NM_177569 | NA              | NA     | NA                                                    | 3.31 | 2.00 | 0.01 |
| A_52_P343641 | NM_009172 | Siah1a          | 20437  | seven in absentia 1A                                  | 3.58 | 2.00 | 0.01 |
| A_51_P246727 | BC067045  | MLxip           | 208104 | MLX interacting protein                               | 2.75 | 2.00 | 0.06 |

|              |           |           |        |                                                                                                        |      |      |      |
|--------------|-----------|-----------|--------|--------------------------------------------------------------------------------------------------------|------|------|------|
| A_51_P163834 | NM_019717 | Atl2      | 56298  | atlastin GTPase 2                                                                                      | 3.74 | 2.00 | 0.01 |
| A_51_P434859 | XM_890447 | Mllt4     | 17356  | myeloid/lymphoid or mixed-lineage leukemia (trithorax homolog, <i>Drosophila</i> ); translocated to, 4 | 7.70 | 2.00 | 0.00 |
| A_52_P59422  | NM_001005 | Aebp2     | 11569  | AE binding protein 2                                                                                   | 3.37 | 2.00 | 0.01 |
| A_51_P367772 | NM_026157 | Mtpap     | 67440  | mitochondrial poly(A) polymerase                                                                       | 4.19 | 2.00 | 0.00 |
| A_52_P469782 | NM_146228 | Als2cl    | 235633 | ALS2 C-terminal like                                                                                   | 3.00 | 2.00 | 0.03 |
| A_52_P573255 | NM_027219 | Cdc42ep1  | 104445 | CDC42 effector protein (Rho GTPase binding) 1                                                          | 3.28 | 2.00 | 0.01 |
| A_51_P114177 | NM_026947 | 1810022C2 | 69123  | RIKEN cDNA 1810022C23 gene                                                                             | 3.22 | 2.00 | 0.02 |
| A_52_P3383   | AK171100  | Dlst      | 78920  | dihydrolipoamide S-succinyltransferase (E2 component of 2-oxo-glutarate complex)                       | 3.76 | 1.99 | 0.00 |
| A_51_P466875 | NM_023248 | Sbds      | 66711  | Shwachman-Bodian-Diamond syndrome homolog (human)                                                      | 4.15 | 1.99 | 0.00 |
| A_52_P404955 | AK012052  | Rps19     | 20085  | ribosomal protein S19                                                                                  | 3.37 | 1.99 | 0.01 |
| A_52_P123665 | NM_029929 | Vps33a    | 77573  | vacuolar protein sorting 33A (yeast)                                                                   | 4.77 | 1.99 | 0.00 |
| A_51_P323081 | NM_198161 | Bhlhb9    | 70237  | basic helix-loop-helix domain containing, class B9                                                     | 3.37 | 1.99 | 0.01 |
| A_52_P630016 | NM_018742 | Bet1l     | 54399  | blocked early in transport 1 homolog ( <i>S. cerevisiae</i> )-like                                     | 4.00 | 1.99 | 0.00 |
| A_51_P164347 | XM_912670 | NA        | NA     | NA                                                                                                     | 3.35 | 1.99 | 0.01 |
| A_51_P486239 | NM_011606 | Clec3b    | 21922  | C-type lectin domain family 3, member b                                                                | 3.88 | 1.99 | 0.00 |
| A_52_P310930 | NM_024214 | Tomm20    | 67952  | translocase of outer mitochondrial membrane 20 homolog (yeast)                                         | 5.26 | 1.99 | 0.00 |
| A_51_P480062 | NM_023305 | Ubap1     | 67123  | ubiquitin-associated protein 1                                                                         | 4.55 | 1.99 | 0.00 |
| A_52_P305246 | NM_027722 | Nudt4     | 71207  | nudix (nucleoside diphosphate linked moiety X)-type motif 4                                            | 2.85 | 1.99 | 0.05 |
| A_52_P141161 | NM_133834 | Hnrnpf    | 98758  | heterogeneous nuclear ribonucleoprotein F                                                              | 2.98 | 1.99 | 0.03 |
| A_52_P593200 | NM_029688 | Srxn1     | 76650  | sulfiredoxin 1 homolog ( <i>S. cerevisiae</i> )                                                        | 2.77 | 1.99 | 0.05 |
| A_52_P103391 | NM_022305 | B4galt1   | 14595  | UDP-Gal:betaGlcNAc beta 1,4- galactosyltransferase, polypeptide 1                                      | 3.54 | 1.99 | 0.01 |
| A_52_P116192 | NM_033565 | Aff4      | 93736  | AF4/FMR2 family, member 4                                                                              | 3.88 | 1.99 | 0.00 |
| A_51_P378856 | NM_019703 | Pfcp      | 56421  | phosphofructokinase, platelet                                                                          | 3.17 | 1.99 | 0.02 |
| A_51_P151902 | NM_145584 | Spon1     | 233744 | spondin 1, (f-spondin) extracellular matrix protein                                                    | 3.94 | 1.98 | 0.00 |



|              |           |           |        |                                                                |      |      |      |
|--------------|-----------|-----------|--------|----------------------------------------------------------------|------|------|------|
| A_51_P172373 | NM_153792 | Traf7     | 224619 | TNF receptor-associated factor 7                               | 3.53 | 1.98 | 0.01 |
| A_51_P127756 | NM_017397 | Ddx20     | 53975  | DEAD (Asp-Glu-Ala-Asp) box polypeptide 20                      | 3.85 | 1.98 | 0.00 |
| A_52_P282276 | NM_175145 | Tmem127   | 69470  | transmembrane protein 127                                      | 4.14 | 1.98 | 0.00 |
| A_51_P352968 | NM_008538 | Marcks    | 17118  | myristoylated alanine rich protein kinase C substrate          | 3.00 | 1.98 | 0.03 |
| A_52_P292404 | NM_080434 | Apoa5     | 66113  | apolipoprotein A-V                                             | 2.96 | 1.98 | 0.03 |
| A_51_P357561 | NM_026791 | Fbxw9     | 68628  | F-box and WD-40 domain protein 9                               | 2.83 | 1.98 | 0.05 |
| A_51_P502724 | XM_283903 | Fam102b   | 329739 | family with sequence similarity 102, member B                  | 4.22 | 1.98 | 0.00 |
| A_52_P651425 | NM_010876 | Ncf1      | 17969  | neutrophil cytosolic factor 1                                  | 5.23 | 1.98 | 0.00 |
| A_51_P269456 | NM_009761 | Bnip3l    | 12177  | BCL2/adenovirus E1B interacting protein 3-like                 | 2.93 | 1.98 | 0.04 |
| A_52_P256507 | XR_004625 | Gm9615    | 674214 | predicted gene 9615                                            | 3.24 | 1.98 | 0.01 |
| A_52_P402761 | BC076613  | Esco1     | 77805  | establishment of cohesion 1 homolog 1 ( <i>S. cerevisiae</i> ) | 2.88 | 1.98 | 0.04 |
| A_51_P123345 | NM_007477 | Arf2      | 11841  | ADP-ribosylation factor 2                                      | 3.87 | 1.98 | 0.00 |
| A_51_P149349 | BC022652  | Nfxl1     | 100978 | nuclear transcription factor, X-box binding-like 1             | 2.93 | 1.98 | 0.04 |
| A_52_P625683 | NM_021534 | Pxmp4     | 59038  | peroxisomal membrane protein 4                                 | 3.22 | 1.98 | 0.02 |
| A_51_P490867 | NM_199016 | Enpp4     | 224794 | ectonucleotide pyrophosphatase/phosphodiesterase 4             | 3.25 | 1.98 | 0.01 |
| A_51_P454638 | NM_134073 | Kctd9     | 105440 | potassium channel tetramerisation domain containing 9          | 4.33 | 1.98 | 0.00 |
| A_51_P214197 | NM_133810 | Stk17b    | 98267  | serine/threonine kinase 17b (apoptosis-inducing)               | 2.75 | 1.98 | 0.06 |
| A_51_P454422 | AB093296  | Unc79     | 217843 | unc-79 homolog ( <i>C. elegans</i> )                           | 2.72 | 1.98 | 0.07 |
| A_52_P3845   | XM_193558 | Rnf217    | 268291 | ring finger protein 217                                        | 3.24 | 1.98 | 0.01 |
| A_51_P302520 | NM_010867 | Myom1     | 17929  | myomesin 1                                                     | 3.75 | 1.98 | 0.00 |
| A_51_P450854 | XM_992913 | NA        | NA     | NA                                                             | 3.18 | 1.98 | 0.02 |
| A_52_P32561  | AK037212  | A030010E1 | 320039 | RIKEN cDNA A030010E16 gene                                     | 2.99 | 1.98 | 0.03 |
| A_52_P147633 | NM_203507 | Rwdd4a    | 192174 | RWD domain containing 4A                                       | 3.49 | 1.98 | 0.01 |
| A_52_P135175 | NM_025480 | Tmem128   | 66309  | transmembrane protein 128                                      | 5.04 | 1.97 | 0.00 |
| A_51_P259861 | NM_021554 | Mettl9    | 59052  | methyltransferase like 9                                       | 3.35 | 1.97 | 0.01 |
| A_51_P272184 | NM_026201 | Ccar1     | 67500  | cell division cycle and apoptosis regulator 1                  | 4.27 | 1.97 | 0.00 |
| A_52_P446625 | NM_001024 | AW555464  | 217882 | expressed sequence AW555464                                    | 3.98 | 1.97 | 0.00 |
| A_52_P564962 | NA        | NA        | NA     | NA                                                             | 3.81 | 1.97 | 0.00 |
| A_51_P382369 | NM_175751 | Zfp608    | 269023 | zinc finger protein 608                                        | 3.12 | 1.97 | 0.02 |

|              |           |           |        |                                                                                               |      |      |      |
|--------------|-----------|-----------|--------|-----------------------------------------------------------------------------------------------|------|------|------|
| A_51_P160514 | NM_021328 | Bin3      | 57784  | bridging integrator 3                                                                         | 3.90 | 1.97 | 0.00 |
| A_51_P224023 | NM_144846 | Fam49b    | 223601 | family with sequence similarity 49, member B                                                  | 4.04 | 1.97 | 0.00 |
| A_52_P200244 | NM_011479 | Sptlc2    | 20773  | serine palmitoyltransferase, long chain base subunit 2                                        | 4.55 | 1.97 | 0.00 |
| A_51_P103533 | XM_132499 | NA        | NA     | NA                                                                                            | 3.29 | 1.97 | 0.01 |
| A_51_P496491 | NM_028031 | Zdhhc13   | 243983 | zinc finger, DHHC domain containing 13                                                        | 3.81 | 1.97 | 0.00 |
| A_52_P396498 | NM_010587 | Itsn1     | 16443  | intersectin 1 (SH3 domain protein 1A)                                                         | 3.63 | 1.97 | 0.01 |
| A_52_P588096 | NM_175515 | Intu      | 380614 | inturned planar cell polarity effector homolog (Drosophila)                                   | 2.75 | 1.97 | 0.06 |
| A_52_P62428  | BC057363  | Tug1      | 544752 | taurine upregulated gene 1                                                                    | 2.94 | 1.97 | 0.03 |
| A_51_P367100 | NM_008407 | Itih3     | 16426  | inter-alpha trypsin inhibitor, heavy chain 3                                                  | 3.96 | 1.97 | 0.00 |
| A_52_P46039  | BC075692  | Kctd18    | 51960  | potassium channel tetramerisation domain containing 18                                        | 3.85 | 1.97 | 0.00 |
| A_52_P141322 | NM_010117 | Rhbdf1    | 13650  | rhomboid family 1 (Drosophila)                                                                | 5.67 | 1.97 | 0.00 |
| A_52_P571444 | NM_133784 | Wwtr1     | 97064  | WW domain containing transcription regulator 1                                                | 2.79 | 1.97 | 0.05 |
| A_52_P285182 | NM_021720 | Donson    | 60364  | downstream neighbor of SON                                                                    | 3.59 | 1.97 | 0.01 |
| A_51_P318551 | NM_145431 | Nle1      | 217011 | notchless homolog 1 (Drosophila)                                                              | 3.25 | 1.97 | 0.01 |
| A_52_P595476 | NM_183390 | Khlh6     | 239743 | kelch-like 6 (Drosophila)                                                                     | 3.61 | 1.97 | 0.01 |
| A_52_P527917 | NM_028247 | Slc16a10  | 72472  | solute carrier family 16 (monocarboxylic acid transporters), member 10                        | 5.66 | 1.97 | 0.00 |
| A_51_P503953 | NM_027993 | 2310028H2 | 71901  | RIKEN cDNA 2310028H24 gene                                                                    | 3.27 | 1.97 | 0.01 |
| A_52_P490272 | NM_022979 | Nup98     | 269966 | nucleoporin 98                                                                                | 3.49 | 1.97 | 0.01 |
| A_51_P103000 | NM_008851 | Pitpnm1   | 18739  | phosphatidylinositol transfer protein, membrane-associated 1                                  | 4.97 | 1.97 | 0.00 |
| A_52_P288614 | NM_025936 | Rars      | 104458 | arginyl-tRNA synthetase                                                                       | 4.26 | 1.97 | 0.00 |
| A_52_P284927 | BC027257  | 5930434B0 | 381356 | RIKEN cDNA 5930434B04 gene                                                                    | 4.14 | 1.97 | 0.00 |
| A_52_P577748 | NM_134152 | Lpxn      | 107321 | leupaxin                                                                                      | 3.88 | 1.97 | 0.00 |
| A_51_P416910 | NM_172289 | Slc36a4   | 234967 | solute carrier family 36 (proton/amino acid symporter), member 4                              | 3.03 | 1.96 | 0.03 |
| A_52_P3029   | NM_026644 | Agpat4    | 68262  | 1-acylglycerol-3-phosphate O-acyltransferase 4 (lysophosphatidic acid acyltransferase, delta) | 3.85 | 1.96 | 0.00 |
| A_52_P252469 | NM_133927 | Itfg2     | 101142 | integrin alpha FG-GAP repeat containing 2                                                     | 2.77 | 1.96 | 0.05 |
| A_51_P421912 | NM_145711 | Tox       | 252838 | thymocyte selection-associated high mobility group box                                        | 3.31 | 1.96 | 0.01 |

|              |           |           |        |                                                                        |      |      |      |
|--------------|-----------|-----------|--------|------------------------------------------------------------------------|------|------|------|
| A_51_P328963 | NM_011672 | Ufd1l     | 22230  | ubiquitin fusion degradation 1 like                                    | 5.07 | 1.96 | 0.00 |
| A_52_P575854 | NM_007396 | Acvr2a    | 11480  | activin receptor IIA                                                   | 3.77 | 1.96 | 0.00 |
| A_51_P468134 | NM_008186 | Gtf2h1    | 14884  | general transcription factor II H, polypeptide 1                       | 4.08 | 1.96 | 0.00 |
| A_51_P446192 | AK132230  | Esf1      | 66580  | ESF1, nucleolar pre-rRNA processing protein, homolog (S. cerevisiae)   | 3.26 | 1.96 | 0.01 |
| A_51_P309170 | AK084086  | 9130023H2 | 1E+08  | RIKEN cDNA 9130023H24 gene                                             | 2.71 | 1.96 | 0.07 |
| A_52_P364232 | NM_011083 | Pik3c2a   | 18704  | phosphatidylinositol 3-kinase, C2 domain containing, alpha polypeptide | 3.08 | 1.96 | 0.02 |
| A_52_P313279 | NM_001034 | NA        | NA     | NA                                                                     | 5.04 | 1.96 | 0.00 |
| A_51_P422636 | NM_011603 | Tbpl1     | 237336 | TATA box binding protein-like 1                                        | 3.18 | 1.96 | 0.02 |
| A_52_P446644 | NA        | NA        | NA     | NA                                                                     | 4.73 | 1.96 | 0.00 |
| A_51_P441983 | NM_008396 | Itga2     | 16398  | integrin alpha 2                                                       | 5.59 | 1.96 | 0.00 |
| A_51_P173622 | NM_011202 | Ptpn11    | 19247  | protein tyrosine phosphatase, non-receptor type 11                     | 4.95 | 1.96 | 0.00 |
| A_51_P392291 | NM_145630 | Pdk3      | 236900 | pyruvate dehydrogenase kinase, isoenzyme 3                             | 5.57 | 1.96 | 0.00 |
| A_52_P470401 | NM_025708 | Tmem186   | 66690  | transmembrane protein 186                                              | 3.40 | 1.96 | 0.01 |
| A_52_P243522 | NM_173862 | Fam83a    | 239463 | family with sequence similarity 83, member A                           | 4.67 | 1.96 | 0.00 |
| A_52_P17228  | NM_177093 | Lrrc58    | 320184 | leucine rich repeat containing 58                                      | 5.23 | 1.96 | 0.00 |
| A_52_P630449 | NM_018742 | Bet1l     | 54399  | blocked early in transport 1 homolog (S. cerevisiae)-like              | 4.77 | 1.96 | 0.00 |
| A_52_P112017 | NM_009775 | Tspo      | 12257  | translocator protein                                                   | 5.04 | 1.96 | 0.00 |
| A_51_P407989 | NM_029508 | Pcgf5     | 76073  | polycomb group ring finger 5                                           | 2.81 | 1.95 | 0.05 |
| A_52_P599264 | NM_175088 | Mdfic     | 16543  | MyoD family inhibitor domain containing                                | 5.04 | 1.95 | 0.00 |
| A_52_P107424 | NM_010731 | Zbtb7a    | 16969  | zinc finger and BTB domain containing 7a                               | 4.29 | 1.95 | 0.00 |
| A_52_P491616 | AK053892  | Nos1ap    | 70729  | nitric oxide synthase 1 (neuronal) adaptor protein                     | 4.15 | 1.95 | 0.00 |
| A_51_P440892 | NM_026344 | Dph2      | 67728  | DPH2 homolog (S. cerevisiae)                                           | 3.79 | 1.95 | 0.00 |
| A_51_P381157 | NM_027420 | 2610034B1 | 70420  | RIKEN cDNA 2610034B18 gene                                             | 3.80 | 1.95 | 0.00 |
| A_51_P204237 | NM_008929 | Dnajc3    | 1E+08  | DnaJ (Hsp40) homolog, subfamily C, member 3                            | 5.40 | 1.95 | 0.00 |
| A_51_P322095 | NM_026924 | Ovo12     | 107586 | ovo-like 2 (Drosophila)                                                | 3.73 | 1.95 | 0.01 |
| A_51_P136479 | NM_030096 | Ddx52     | 78394  | DEAD (Asp-Glu-Ala-Asp) box polypeptide 52                              | 2.88 | 1.95 | 0.04 |
| A_52_P67485  | AK049578  | Cltc      | 67300  | clathrin, heavy polypeptide (Hc)                                       | 2.71 | 1.95 | 0.07 |
| A_51_P212107 | NM_025680 | Ctnnb1    | 66642  | catenin, beta like 1                                                   | 4.42 | 1.95 | 0.00 |
| A_51_P221144 | BC019143  | 1300010F0 | 219189 | RIKEN cDNA 1300010F03 gene                                             | 3.36 | 1.95 | 0.01 |

|              |           |            |        |                                                                                        |      |      |      |
|--------------|-----------|------------|--------|----------------------------------------------------------------------------------------|------|------|------|
| A_52_P470972 | NM_011596 | Atp6v0a2   | 21871  | ATPase, H+ transporting, lysosomal V0 subunit A2                                       | 3.58 | 1.95 | 0.01 |
| A_51_P363668 | NM_011276 | Rlim       | 19820  | ring finger protein, LIM domain interacting                                            | 5.95 | 1.95 | 0.00 |
| A_51_P496996 | NM_001034 | NA         | NA     | NA                                                                                     | 4.34 | 1.95 | 0.00 |
| A_51_P509609 | NM_053082 | Tspan4     | 64540  | tetraspanin 4                                                                          | 4.81 | 1.95 | 0.00 |
| A_52_P178904 | NM_028112 | Seh1l      | 72124  | SEH1-like (S. cerevisiae                                                               | 4.60 | 1.95 | 0.00 |
| A_51_P195947 | NM_178654 | Pkn2       | 109333 | protein kinase N2                                                                      | 2.89 | 1.95 | 0.04 |
| A_52_P65108  | NM_008539 | Smad1      | 17125  | MAD homolog 1 (Drosophila)                                                             | 4.08 | 1.95 | 0.00 |
| A_52_P351694 | NM_199299 | Phf15      | 76901  | PHD finger protein 15                                                                  | 3.90 | 1.95 | 0.00 |
| A_51_P328760 | NM_027470 | Pak4       | 70584  | p21 protein (Cdc42/Rac)-activated kinase 4                                             | 5.59 | 1.95 | 0.00 |
| A_52_P609387 | AK044402  | AI848100   | 226551 | expressed sequence AI848100                                                            | 3.68 | 1.94 | 0.01 |
| A_52_P199446 | XM_974928 | NA         | NA     | NA                                                                                     | 2.94 | 1.94 | 0.04 |
| A_52_P62444  | AK029181  | Syn2       | 20965  | synapsin II                                                                            | 3.53 | 1.94 | 0.01 |
| A_52_P274960 | NM_001005 | Arhgap30   | 226652 | Rho GTPase activating protein 30                                                       | 3.77 | 1.94 | 0.00 |
| A_51_P349036 | NM_172339 | Snapc4     | 227644 | small nuclear RNA activating complex, polypeptide 4                                    | 3.40 | 1.94 | 0.01 |
| A_52_P579258 | NA        | NA         | NA     | NA                                                                                     | 4.50 | 1.94 | 0.00 |
| A_52_P144917 | NM_029756 | Sdccag8    | 76816  | serologically defined colon cancer antigen 8                                           | 4.28 | 1.94 | 0.00 |
| A_52_P498231 | NM_011349 | Sema3f     | 20350  | sema domain, immunoglobulin domain (Ig), short basic domain, secreted, (semaphorin) 3F | 4.46 | 1.94 | 0.00 |
| A_52_P330395 | NM_134082 | Farp1      | 223254 | FERM, RhoGEF (Arhgef) and pleckstrin domain protein 1 (chondrocyte-derived)            | 5.23 | 1.94 | 0.00 |
| A_51_P180825 | NM_008707 | Nmt1       | 18107  | N-myristoyltransferase 1                                                               | 3.63 | 1.94 | 0.01 |
| A_51_P332627 | NM_016776 | Mybbp1a    | 18432  | MYB binding protein (P160) 1a                                                          | 2.95 | 1.94 | 0.03 |
| A_52_P657286 | NM_024468 | Trim39     | 79263  | tripartite motif-containing 39                                                         | 4.07 | 1.94 | 0.00 |
| A_52_P17115  | NM_133206 | Znrf1      | 170737 | zinc and ring finger 1                                                                 | 4.07 | 1.94 | 0.00 |
| A_51_P163867 | NM_146081 | Ppp4r1     | 70351  | protein phosphatase 4, regulatory subunit 1                                            | 4.21 | 1.94 | 0.00 |
| A_52_P335842 | AK050411  | Rrbp1      | 81910  | ribosome binding protein 1                                                             | 3.58 | 1.94 | 0.01 |
| A_51_P473576 | NM_009687 | Apex1      | 11792  | apurinic/apyrimidinic endonuclease 1                                                   | 3.90 | 1.94 | 0.00 |
| A_51_P406008 | NM_021555 | Brp16      | 59053  | brain protein 16                                                                       | 4.15 | 1.94 | 0.00 |
| A_51_P501236 | BY715230  | NA         | NA     | NA                                                                                     | 3.34 | 1.94 | 0.01 |
| A_52_P223828 | NM_172286 | 6430548M08 | 234797 | RIKEN cDNA 6430548M08 gene                                                             | 3.82 | 1.94 | 0.00 |
| A_51_P209308 | NM_022811 | Polr1e     | 64424  | polymerase (RNA) I polypeptide E                                                       | 2.74 | 1.94 | 0.07 |
| A_51_P434697 | NM_144839 | Ube2e2     | 218793 | ubiquitin-conjugating enzyme E2E 2 (UBC4/5 homolog, yeast)                             | 5.21 | 1.94 | 0.00 |

|              |           |           |        |                                                                                                |      |      |      |
|--------------|-----------|-----------|--------|------------------------------------------------------------------------------------------------|------|------|------|
| A_52_P247974 | NA        | NA        | NA     | NA                                                                                             | 2.71 | 1.94 | 0.07 |
| A_51_P270891 | AK006811  | 1700056E2 | 73363  | RIKEN cDNA 1700056E22 gene                                                                     | 2.76 | 1.93 | 0.06 |
| A_52_P33287  | NM_011561 | Tdg       | 21665  | thymine DNA glycosylase                                                                        | 3.86 | 1.93 | 0.00 |
| A_51_P201276 | NM_145455 | Btf3      | 218490 | basic transcription factor 3                                                                   | 4.48 | 1.93 | 0.00 |
| A_51_P361099 | NM_007422 | Adss      | 11566  | adenylosuccinate synthetase, non muscle                                                        | 3.49 | 1.93 | 0.01 |
| A_51_P446022 | AK052528  | D430042O  | 233865 | RIKEN cDNA D430042O09 gene                                                                     | 3.25 | 1.93 | 0.01 |
| A_52_P39533  | NM_178729 | Fbxl5     | 242960 | F-box and leucine-rich repeat protein 5                                                        | 2.94 | 1.93 | 0.04 |
| A_51_P240801 | BC046640  | Tmem173   | 72512  | transmembrane protein 173                                                                      | 2.80 | 1.93 | 0.05 |
| A_52_P212336 | NM_001024 | NA        | NA     | NA                                                                                             | 3.60 | 1.93 | 0.01 |
| A_51_P461884 | NM_009595 | Abl2      | 11352  | v-abl Abelson murine leukemia viral oncogene homolog 2 (arg, Abelson-related gene)             | 2.97 | 1.93 | 0.03 |
| A_52_P665768 | NM_001033 | Cox18     | 231430 | COX18 cytochrome c oxidase assembly homolog (S. cerevisiae)                                    | 3.34 | 1.93 | 0.01 |
| A_51_P325217 | AK036311  | 9630055L0 | 319580 | RIKEN cDNA 9630055L06 gene                                                                     | 2.74 | 1.93 | 0.06 |
| A_51_P319805 | NM_203492 | Mrgprg    | 381974 | MAS-related GPR, member G                                                                      | 3.44 | 1.93 | 0.01 |
| A_51_P308814 | NM_026654 | Toe1      | 68276  | target of EGR1, member 1 (nuclear)                                                             | 4.55 | 1.93 | 0.00 |
| A_51_P299393 | XM_983620 | NA        | NA     | NA                                                                                             | 2.94 | 1.93 | 0.04 |
| A_51_P348022 | NM_026623 | Nudt21    | 68219  | nudix (nucleoside diphosphate linked moiety X)-type motif 21                                   | 3.56 | 1.93 | 0.01 |
| A_52_P125494 | NM_199017 | 9230110C1 | 234912 | RIKEN cDNA 9230110C19 gene                                                                     | 3.82 | 1.93 | 0.00 |
| A_51_P329855 | NM_183149 | Zfp598    | 213753 | zinc finger protein 598                                                                        | 3.60 | 1.93 | 0.01 |
| A_51_P332939 | NM_134082 | Farp1     | 223254 | FERM, RhoGEF (Arhgef) and pleckstrin domain protein 1 (chondrocyte-derived)                    | 3.53 | 1.93 | 0.01 |
| A_51_P284476 | NM_023122 | Gpm6b     | 14758  | glycoprotein m6b                                                                               | 3.73 | 1.93 | 0.01 |
| A_52_P468937 | NM_011743 | Zfp106    | 20402  | zinc finger protein 106                                                                        | 3.23 | 1.92 | 0.02 |
| A_52_P18816  | NM_019650 | Gosr2     | 56494  | golgi SNAP receptor complex member 2                                                           | 4.08 | 1.92 | 0.00 |
| A_52_P369112 | NM_011665 | Ube2i     | 22196  | ubiquitin-conjugating enzyme E2I                                                               | 3.30 | 1.92 | 0.01 |
| A_52_P609200 | NM_012032 | Serinc3   | 26943  | serine incorporator 3                                                                          | 2.73 | 1.92 | 0.07 |
| A_51_P297799 | NM_001015 | Rap1gap2  | 380711 | RAP1 GTPase activating protein 2                                                               | 4.06 | 1.92 | 0.00 |
| A_52_P201315 | AK079723  | B3gat3    | 72727  | beta-1,3-glucuronyltransferase 3 (glucuronosyltransferase I)                                   | 3.16 | 1.92 | 0.02 |
| A_52_P400831 | NM_001001 | Adamts13  | 279028 | a disintegrin-like and metallopeptidase (reprolysin type) with thrombospondin type 1 motif, 13 | 3.79 | 1.92 | 0.00 |

|              |           |         |        |                                                                                                      |      |      |      |
|--------------|-----------|---------|--------|------------------------------------------------------------------------------------------------------|------|------|------|
| A_52_P502754 | NM_009667 | Ampd3   | 11717  | adenosine monophosphate deaminase 3                                                                  | 3.43 | 1.92 | 0.01 |
| A_52_P647900 | AK171223  | Arhgef2 | 16800  | rho/rac guanine nucleotide exchange factor (GEF) 2                                                   | 4.21 | 1.92 | 0.00 |
| A_51_P386358 | NM_025830 | Wwp2    | 66894  | WW domain containing E3 ubiquitin protein ligase 2                                                   | 4.03 | 1.92 | 0.00 |
| A_52_P73559  | XM_914588 | Gm7241  | 638532 | predicted gene 7241                                                                                  | 3.55 | 1.92 | 0.01 |
| A_52_P491861 | NM_009282 | Stag1   | 20842  | stromal antigen 1                                                                                    | 3.11 | 1.92 | 0.02 |
| A_51_P126302 | NM_173376 | Rbmx2   | 209003 | RNA binding motif protein, X-linked 2                                                                | 2.83 | 1.92 | 0.05 |
| A_52_P200265 | NM_020042 | Mocs1   | 56738  | molybdenum cofactor synthesis 1                                                                      | 3.15 | 1.92 | 0.02 |
| A_51_P119857 | AK017680  | Spred1  | 114715 | sprouty protein with EVH-1 domain 1, related sequence                                                | 2.94 | 1.92 | 0.04 |
| A_52_P233441 | NM_008090 | Gata2   | 14461  | GATA binding protein 2                                                                               | 3.55 | 1.92 | 0.01 |
| A_52_P645285 | NA        | NA      | NA     | NA                                                                                                   | 4.69 | 1.92 | 0.00 |
| A_52_P665767 | NM_001033 | Cox18   | 231430 | COX18 cytochrome c oxidase assembly homolog (S. cerevisiae)                                          | 3.94 | 1.92 | 0.00 |
| A_51_P368696 | NM_001042 | Apaf1   | 11783  | apoptotic peptidase activating factor 1                                                              | 4.53 | 1.92 | 0.00 |
| A_51_P473633 | AK035191  | Tead1   | 21676  | TEA domain family member 1                                                                           | 3.25 | 1.92 | 0.01 |
| A_52_P413584 | AK078829  | Nrip1   | 268903 | nuclear receptor interacting protein 1                                                               | 2.78 | 1.92 | 0.05 |
| A_52_P566208 | AK014593  | Rpl11   | 67025  | ribosomal protein L11                                                                                | 4.18 | 1.92 | 0.00 |
| A_51_P143712 | NM_021480 | Tdh     | 58865  | L-threonine dehydrogenase                                                                            | 4.50 | 1.92 | 0.00 |
| A_52_P885107 | BM216128  | NA      | NA     | NA                                                                                                   | 3.60 | 1.92 | 0.01 |
| A_51_P423444 | NM_199448 | Fez2    | 225020 | fasciculation and elongation protein zeta 2 (zygin II)                                               | 4.86 | 1.92 | 0.00 |
| A_52_P638121 | XM_001001 | NA      | NA     | NA                                                                                                   | 5.75 | 1.92 | 0.00 |
| A_51_P222657 | NM_009775 | Tspo    | 12257  | translocator protein                                                                                 | 4.47 | 1.92 | 0.00 |
| A_52_P526396 | NM_178628 | Atl1    | 73991  | atlastin GTPase 1                                                                                    | 3.44 | 1.92 | 0.01 |
| A_52_P4657   | NM_172722 | Naa25   | 231713 | N(alpha)-acetyltransferase 25, NatB auxiliary subunit tumor necrosis factor, alpha-induced protein 1 | 3.86 | 1.91 | 0.00 |
| A_52_P52036  | NM_009395 | Tnfaip1 | 21927  | (endothelial)                                                                                        | 3.45 | 1.91 | 0.01 |
| A_52_P571661 | NM_025811 | Nhlrc2  | 66866  | NHL repeat containing 2                                                                              | 5.92 | 1.91 | 0.00 |
| A_52_P427174 | NM_030713 | Zfp202  | 80902  | zinc finger protein 202                                                                              | 4.21 | 1.91 | 0.00 |
| A_52_P248604 | NM_009868 | Cdh5    | 12562  | cadherin 5                                                                                           | 3.79 | 1.91 | 0.00 |

|              |            |                 |        |                                                          |      |      |      |
|--------------|------------|-----------------|--------|----------------------------------------------------------|------|------|------|
| A_52_P68306  | NM_172910  | Dlgap2          | 244310 | discs, large (Drosophila) homolog-associated protein 2   | 4.47 | 1.91 | 0.00 |
| A_52_P366772 | NM_173735  | 2310044G1217732 |        | RIKEN cDNA 2310044G17 gene                               | 3.54 | 1.91 | 0.01 |
| A_51_P381618 | NM_134102  | Pla1a           | 85031  | phospholipase A1 member A                                | 3.18 | 1.91 | 0.02 |
| A_52_P337716 | NA         | NA              | NA     | NA                                                       | 4.26 | 1.91 | 0.00 |
| A_52_P627327 | XM_0010037 | NA              | NA     | NA                                                       | 3.38 | 1.91 | 0.01 |
|              |            |                 |        | potassium channel tetramerisation domain containing      |      |      |      |
| A_51_P440707 | NM_025888  | Kctd20          | 66989  | 20                                                       | 3.62 | 1.91 | 0.01 |
| A_51_P381657 | NM_146144  | Usp1            | 230484 | ubiquitin specific peptidase 1                           | 4.19 | 1.91 | 0.00 |
| A_51_P173197 | NM_027352  | Gorasp2         | 70231  | golgi reassembly stacking protein 2                      | 5.43 | 1.91 | 0.00 |
|              |            |                 |        | dual specificity phosphatase 11 (RNA/RNP complex 1-      |      |      |      |
| A_52_P435426 | NM_028099  | Dusp11          | 72102  | interacting)                                             | 4.90 | 1.91 | 0.00 |
| A_51_P502012 | NM_176972  | Usp37           | 319651 | ubiquitin specific peptidase 37                          | 3.25 | 1.91 | 0.01 |
|              |            |                 |        | TATA box binding protein (Tbp)-associated factor, RNA    |      |      |      |
| A_51_P411355 | NM_021441  | Taf1c           | 21341  | polymerase I, C                                          | 4.76 | 1.91 | 0.00 |
|              |            |                 |        |                                                          |      |      |      |
| A_51_P419571 | NM_027101  | Polr2d          | 69241  | polymerase (RNA) II (DNA directed) polypeptide D         | 5.33 | 1.91 | 0.00 |
| A_52_P467718 | NM_029505  | Ap3m2           | 64933  | adaptor-related protein complex 3, mu 2 subunit          | 3.27 | 1.91 | 0.01 |
| A_51_P113222 | NM_027270  | Exoc1           | 69940  | exocyst complex component 1                              | 4.51 | 1.91 | 0.00 |
| A_52_P347078 | AK089832   | Atox1           | 11927  | ATX1 (antioxidant protein 1) homolog 1 (yeast)           | 3.83 | 1.91 | 0.00 |
| A_51_P355821 | NM_026999  | Zfp688          | 69234  | zinc finger protein 688                                  | 3.18 | 1.90 | 0.02 |
| A_51_P216108 | NM_146244  | Rps6kl1         | 238323 | ribosomal protein S6 kinase-like 1                       | 3.13 | 1.90 | 0.02 |
| A_52_P418724 | NM_001039  | Morf4l1         | 21761  | mortality factor 4 like 1                                | 5.13 | 1.90 | 0.00 |
| A_51_P281806 | XM_618787  | NA              | NA     | NA                                                       | 3.55 | 1.90 | 0.01 |
| A_51_P378967 | NM_001039  | NA              | NA     | NA                                                       | 4.03 | 1.90 | 0.00 |
| A_52_P17112  | NM_133206  | Znrf1           | 170737 | zinc and ring finger 1                                   | 3.14 | 1.90 | 0.02 |
|              |            |                 |        |                                                          |      |      |      |
| A_51_P219822 | NM_026234  | Pigm            | 67556  | phosphatidylinositol glycan anchor biosynthesis, class M | 3.84 | 1.90 | 0.00 |
| A_52_P630646 | NM_026654  | Toe1            | 68276  | target of EGR1, member 1 (nuclear)                       | 3.99 | 1.90 | 0.00 |
| A_51_P172231 | NM_026960  | Gsdmd           | 69146  | gasdermin D                                              | 2.75 | 1.90 | 0.06 |
| A_51_P515768 | AK033091   | Pdlim7          | 67399  | PDZ and LIM domain 7                                     | 3.18 | 1.90 | 0.02 |
| A_51_P494196 | U14333     | Arnt            | 11863  | aryl hydrocarbon receptor nuclear translocator           | 3.68 | 1.90 | 0.01 |
| A_51_P395011 | NM_007523  | Bak1            | 12018  | BCL2-antagonist/killer 1                                 | 3.60 | 1.90 | 0.01 |

|              |           |            |        |                                                                                       |      |      |      |
|--------------|-----------|------------|--------|---------------------------------------------------------------------------------------|------|------|------|
| A_52_P105501 | NM_022885 | Slc30a5    | 69048  | solute carrier family 30 (zinc transporter), member 5                                 | 2.84 | 1.90 | 0.05 |
| A_52_P670172 | NM_198627 | Vstm2l     | 277432 | V-set and transmembrane domain containing 2-like                                      | 4.64 | 1.90 | 0.00 |
| A_52_P645159 | NM_001013 | Cpsf6      | 432508 | cleavage and polyadenylation specific factor 6                                        | 5.49 | 1.90 | 0.00 |
| A_51_P483220 | NM_008378 | Impact     | 16210  | imprinted and ancient                                                                 | 2.91 | 1.90 | 0.04 |
| A_52_P547187 | NM_138667 | Tab2       | 68652  | TGF-beta activated kinase 1/MAP3K7 binding protein 2                                  | 3.22 | 1.90 | 0.02 |
| A_52_P244034 | BC024780  | Diablo     | 66593  | diablo homolog (Drosophila)                                                           | 2.81 | 1.90 | 0.05 |
| A_51_P513449 | NM_172683 | Pogz       | 229584 | pogo transposable element with ZNF domain                                             | 2.97 | 1.90 | 0.03 |
| A_52_P665887 | BC068026  | Aire       | 11634  | autoimmune regulator (autoimmune polyendocrinopathy candidiasis ectodermal dystrophy) | 2.71 | 1.90 | 0.07 |
| A_52_P450188 | NM_133215 | Mtmr4      | 170749 | myotubularin related protein 4                                                        | 5.33 | 1.90 | 0.00 |
| A_51_P321331 | NM_011479 | Sptlc2     | 20773  | serine palmitoyltransferase, long chain base subunit 2                                | 3.84 | 1.90 | 0.00 |
| A_52_P253015 | AK163954  | Erap1      | 80898  | endoplasmic reticulum aminopeptidase 1                                                | 3.26 | 1.90 | 0.01 |
| A_51_P349691 | NM_133979 | Ano10      | 102566 | anoctamin 10                                                                          | 3.32 | 1.90 | 0.01 |
| A_51_P521040 | NM_018742 | Bet1l      | 54399  | blocked early in transport 1 homolog (S. cerevisiae)-like                             | 3.72 | 1.89 | 0.01 |
| A_52_P472958 | NM_144826 | Utp6       | 216987 | UTP6, small subunit (SSU) processome component, homolog (yeast)                       | 4.37 | 1.89 | 0.00 |
| A_52_P605296 | XM_977731 | NA         | NA     | NA                                                                                    | 3.03 | 1.89 | 0.03 |
| A_52_P211956 | NM_025658 | Ms4a4d     | 66607  | membrane-spanning 4-domains, subfamily A, member 4D                                   | 3.29 | 1.89 | 0.01 |
| A_51_P386304 | NM_207678 | Ccnl2      | 56036  | cyclin L2                                                                             | 3.14 | 1.89 | 0.02 |
| A_51_P520384 | NM_007502 | Atp1b3     | 11933  | ATPase, Na <sup>+</sup> /K <sup>+</sup> transporting, beta 3 polypeptide              | 4.12 | 1.89 | 0.00 |
| A_52_P335178 | NM_011073 | Prf1       | 18646  | perforin 1 (pore forming protein)                                                     | 5.98 | 1.89 | 0.00 |
| A_51_P196997 | NM_146064 | Soat2      | 223920 | sterol O-acyltransferase 2                                                            | 3.15 | 1.89 | 0.02 |
| A_52_P499206 | NM_013763 | Tbl2       | 27368  | transducin (beta)-like 2                                                              | 4.67 | 1.89 | 0.00 |
| A_51_P455776 | NM_026177 | 1200011118 | 67467  | RIKEN cDNA 1200011118 gene                                                            | 3.11 | 1.89 | 0.02 |
| A_51_P403693 | NM_025692 | Uba5       | 66663  | ubiquitin-like modifier activating enzyme 5                                           | 4.10 | 1.89 | 0.00 |
| A_52_P278549 | NM_010849 | Myc        | 17869  | myelocytomatosis oncogene                                                             | 3.49 | 1.89 | 0.01 |
| A_52_P517730 | NM_009952 | Creb1      | 12912  | cAMP responsive element binding protein 1                                             | 3.77 | 1.89 | 0.00 |



|              |           |            |        |                                                          |      |      |      |
|--------------|-----------|------------|--------|----------------------------------------------------------|------|------|------|
| A_51_P313067 | NM_178793 | Ccbe1      | 320924 | collagen and calcium binding EGF domains 1               | 2.92 | 1.89 | 0.04 |
| A_52_P440044 | NM_025780 | Thap2      | 66816  | THAP domain containing, apoptosis associated protein 2   | 4.09 | 1.89 | 0.00 |
| A_51_P177106 | X89690    | Olfr29-ps1 | 29848  | olfactory receptor 29, pseudogene 1                      | 3.96 | 1.89 | 0.00 |
| A_51_P175555 | NM_134058 | Pelo       | 105083 | pelota homolog (Drosophila)                              | 3.15 | 1.89 | 0.02 |
| A_52_P625508 | NM_009948 | Cpt1b      | 12895  | carnitine palmitoyltransferase 1b, muscle                | 3.12 | 1.89 | 0.02 |
| A_52_P329851 | NM_028836 | Ctbs       | 74245  | chitinase, di-N-acetyl-                                  | 3.11 | 1.89 | 0.02 |
| A_51_P264884 | NM_172277 | Snx8       | 231834 | sorting nexin 8                                          | 4.53 | 1.88 | 0.00 |
| A_51_P305250 | NM_027008 | Kctd5      | 69259  | potassium channel tetramerisation domain containing 5    | 3.44 | 1.88 | 0.01 |
| A_51_P513803 | AK015995  | Fbxo4      | 106052 | F-box protein 4                                          | 3.35 | 1.88 | 0.01 |
| A_51_P394665 | NM_011868 | Peci       | 23986  | peroxisomal delta3, delta2-enoyl-Coenzyme A isomerase    | 4.16 | 1.88 | 0.00 |
| A_52_P409760 | NM_010492 | Ica1       | 15893  | islet cell autoantigen 1                                 | 3.27 | 1.88 | 0.01 |
| A_51_P304065 | NA        | NA         | NA     | NA                                                       | 4.25 | 1.88 | 0.00 |
| A_51_P416974 | NM_016768 | Pbx3       | 18516  | pre B-cell leukemia transcription factor 3               | 6.06 | 1.88 | 0.00 |
| A_52_P87001  | NM_001033 | Nom1       | 433864 | nucleolar protein with MIF4G domain 1                    | 3.50 | 1.88 | 0.01 |
| A_51_P397003 | XM_133990 | NA         | NA     | NA                                                       | 2.77 | 1.88 | 0.06 |
| A_51_P504672 | NM_133665 | Mef2d      | 17261  | myocyte enhancer factor 2D                               | 4.59 | 1.88 | 0.00 |
| A_52_P411315 | AK083355  | NA         | NA     | NA                                                       | 2.78 | 1.88 | 0.05 |
| A_51_P477716 | NM_153112 | Cadm4      | 260299 | cell adhesion molecule 4                                 | 4.70 | 1.88 | 0.00 |
| A_52_P489202 | NM_001001 | 4732465J0  | 414105 | RIKEN cDNA 4732465J04 gene                               | 3.46 | 1.88 | 0.01 |
| A_52_P310140 | NM_021539 | Wsb2       | 59043  | WD repeat and SOCS box-containing 2                      | 3.72 | 1.88 | 0.01 |
| A_51_P334344 | AK047044  | Phf20l1    | 239510 | PHD finger protein 20-like 1                             | 4.07 | 1.88 | 0.00 |
| A_52_P469458 | NM_026654 | Toe1       | 68276  | target of EGR1, member 1 (nuclear)                       | 4.20 | 1.88 | 0.00 |
| A_51_P145772 | NM_025525 | Rnf113a2   | 66381  | ring finger protein 113A2                                | 5.98 | 1.87 | 0.00 |
| A_51_P112644 | NM_145416 | Kri1       | 215194 | KRI1 homolog (S. cerevisiae)                             | 3.21 | 1.87 | 0.02 |
| A_52_P299311 | XR_002787 | NA         | NA     | NA                                                       | 3.31 | 1.87 | 0.01 |
| A_52_P83905  | NM_007885 | Slc26a2    | 13521  | solute carrier family 26 (sulfate transporter), member 2 | 3.48 | 1.87 | 0.01 |
| A_52_P486482 | NM_177464 | D19Ertd38  | 52013  | DNA segment, Chr 19, ERATO Doi 386, expressed            | 3.65 | 1.87 | 0.01 |
| A_51_P503004 | NM_170684 | Cpne7      | 102278 | copine VII                                               | 3.43 | 1.87 | 0.01 |
| A_52_P683572 | NM_021539 | Wsb2       | 59043  | WD repeat and SOCS box-containing 2                      | 3.67 | 1.87 | 0.01 |
| A_52_P355014 | NM_025875 | Rbm8a      | 60365  | RNA binding motif protein 8a                             | 2.90 | 1.87 | 0.04 |

|              |           |            |        |                                                        |      |      |      |
|--------------|-----------|------------|--------|--------------------------------------------------------|------|------|------|
| A_52_P561073 | NM_145711 | Tox        | 252838 | thymocyte selection-associated high mobility group box | 3.71 | 1.87 | 0.01 |
| A_51_P512061 | BC085280  | 1600015110 | 69761  | RIKEN cDNA 1600015110 gene                             | 4.15 | 1.87 | 0.00 |
| A_51_P199057 | NM_029749 | Usp42      | 76800  | ubiquitin specific peptidase 42                        | 2.86 | 1.87 | 0.05 |
| A_52_P458000 | NM_178901 | AI467606   | 101602 | expressed sequence AI467606                            | 3.09 | 1.87 | 0.02 |
| A_52_P83913  | NM_138744 | Ssx2ip     | 99167  | synovial sarcoma, X breakpoint 2 interacting protein   | 3.70 | 1.87 | 0.01 |
| A_52_P168921 | NM_001008 | Gm5595     | 434179 | predicted gene 5595                                    | 2.70 | 1.87 | 0.07 |
| A_51_P357341 | NM_033444 | Clic1      | 114584 | chloride intracellular channel 1                       | 4.13 | 1.87 | 0.00 |
| A_51_P462746 | AK132870  | Tex10      | 269536 | testis expressed gene 10                               | 3.40 | 1.87 | 0.01 |
| A_51_P480928 | NM_173392 | Zfyve16    | 218441 | zinc finger, FYVE domain containing 16                 | 3.54 | 1.87 | 0.01 |
| A_52_P46410  | AK156117  | 4933407H1  | 171101 | RIKEN cDNA 4933407H18 gene                             | 4.17 | 1.87 | 0.00 |
| A_52_P243553 | NM_007905 | Phc1       | 13619  | polyhomeotic-like 1 (Drosophila)                       | 3.65 | 1.87 | 0.01 |
| A_51_P151820 | XM_489612 | Urb1       | 207932 | URB1 ribosome biogenesis 1 homolog (S. cerevisiae)     | 3.44 | 1.87 | 0.01 |
| A_51_P337755 | NM_026107 | Zkscan6    | 52712  | zinc finger with KRAB and SCAN domains 6               | 3.08 | 1.87 | 0.02 |
| A_51_P238354 | NM_019549 | Plek       | 56193  | pleckstrin                                             | 2.73 | 1.87 | 0.07 |
| A_52_P557923 | NM_015797 | Fbxo6      | 50762  | F-box protein 6                                        | 3.35 | 1.87 | 0.01 |
| A_52_P384822 | AK129235  | Taok2      | 381921 | TAO kinase 2                                           | 3.09 | 1.87 | 0.02 |
| A_52_P628455 | NM_007968 | Ewsr1      | 14030  | Ewing sarcoma breakpoint region 1                      | 3.59 | 1.87 | 0.01 |
| A_51_P261150 | NM_153053 | Sf3b4      | 107701 | splicing factor 3b, subunit 4                          | 3.79 | 1.86 | 0.00 |
| A_52_P424784 | NM_022319 | Clstn2     | 64085  | calsyntenin 2                                          | 2.95 | 1.86 | 0.03 |
| A_51_P222280 | NM_019777 | Ikbke      | 56489  | inhibitor of kappaB kinase epsilon                     | 3.54 | 1.86 | 0.01 |
| A_51_P240019 | NM_013755 | Gyg        | 27357  | glycogenin                                             | 3.63 | 1.86 | 0.01 |
| A_51_P446731 | XM_982789 | NA         | NA     | NA                                                     | 4.49 | 1.86 | 0.00 |
| A_52_P455045 | NM_001013 | Rsl1       | 380855 | regulator of sex limited protein 1                     | 3.92 | 1.86 | 0.00 |
| A_52_P488612 | AK029907  | Btbd9      | 224671 | BTB (POZ) domain containing 9                          | 4.84 | 1.86 | 0.00 |
| A_51_P301804 | NM_009177 | St3gal1    | 20442  | ST3 beta-galactoside alpha-2,3-sialyltransferase 1     | 3.22 | 1.86 | 0.02 |
| A_51_P334104 | NM_007833 | Dcn        | 13179  | decorin                                                | 3.33 | 1.86 | 0.01 |
| A_51_P461138 | NM_016861 | Pdlim1     | 54132  | PDZ and LIM domain 1 (elfin)                           | 3.28 | 1.86 | 0.01 |
| A_51_P136460 | NM_025594 | Zmat2      | 66492  | zinc finger, matrin type 2                             | 2.96 | 1.86 | 0.03 |
| A_51_P381584 | NM_021433 | Stx6       | 58244  | syntaxin 6                                             | 4.12 | 1.86 | 0.00 |
| A_51_P396385 | NM_175439 | Mars2      | 212679 | methionine-tRNA synthetase 2 (mitochondrial)           | 4.39 | 1.86 | 0.00 |

|              |           |                 |        |                                                       |      |      |      |
|--------------|-----------|-----------------|--------|-------------------------------------------------------|------|------|------|
| A_52_P653966 | NM_019426 | Atf7ip          | 54343  | activating transcription factor 7 interacting protein | 4.80 | 1.86 | 0.00 |
| A_51_P520857 | BC027278  | LOC1001341E+08  |        | selenoprotein K pseudogene                            | 5.09 | 1.86 | 0.00 |
| A_51_P326023 | NM_008996 | Rab1            | 19324  | RAB1, member RAS oncogene family                      | 5.41 | 1.86 | 0.00 |
| A_51_P490257 | NM_134099 | Fbxo4           | 106052 | F-box protein 4                                       | 3.28 | 1.86 | 0.01 |
| A_51_P176365 | NM_175035 | Gimap5          | 317757 | GTPase, IMAP family member 5                          | 3.38 | 1.86 | 0.01 |
| A_52_P654108 | NM_001013 | Dync1li2        | 234663 | dynein, cytoplasmic 1 light intermediate chain 2      | 3.03 | 1.86 | 0.03 |
| A_52_P763562 | XM_146893 | Zc3h12c         | 244871 | zinc finger CCCH type containing 12C                  | 3.58 | 1.86 | 0.01 |
| A_52_P504400 | NM_173737 | 8430410A1232210 |        | RIKEN cDNA 8430410A17 gene                            | 3.00 | 1.86 | 0.03 |
| A_52_P71869  | NM_201389 | Plec            | 18810  | plectin                                               | 3.52 | 1.86 | 0.01 |
| A_51_P281057 | NA        | NA              | NA     | NA                                                    | 3.34 | 1.86 | 0.01 |
| A_52_P373766 | NM_025680 | Ctnnbl1         | 66642  | catenin, beta like 1                                  | 3.38 | 1.86 | 0.01 |
| A_52_P661033 | NM_022314 | Tpm3            | 59069  | tropomyosin 3, gamma                                  | 3.74 | 1.86 | 0.01 |
| A_51_P220896 | NM_026879 | Chmp2b          | 68942  | chromatin modifying protein 2B                        | 2.78 | 1.86 | 0.05 |
| A_52_P507169 | AK005177  | 2810449D167234  |        | RIKEN cDNA 2810449D17 gene                            | 2.87 | 1.86 | 0.04 |
| A_52_P485949 | NM_028990 | Tmem168         | 101118 | transmembrane protein 168                             | 4.00 | 1.86 | 0.00 |
| A_52_P48398  | NM_026259 | Rnf41           | 67588  | ring finger protein 41                                | 3.82 | 1.86 | 0.00 |
| A_52_P361356 | NM_026337 | Sltm            | 66660  | SAFB-like, transcription modulator                    | 2.71 | 1.86 | 0.07 |
| A_52_P350687 | NM_177545 | Vangl1          | 229658 | vang-like 1 (van gogh, Drosophila)                    | 3.58 | 1.86 | 0.01 |
| A_51_P121891 | NM_009008 | Rac2            | 19354  | RAS-related C3 botulinum substrate 2                  | 2.84 | 1.86 | 0.05 |
| A_51_P499918 | NM_010407 | Hck             | 15162  | hemopoietic cell kinase                               | 2.80 | 1.86 | 0.05 |
|              |           |                 |        | biogenesis of lysosome-related organelles complex-1,  |      |      |      |
| A_51_P200622 | BC065806  | Bloc1s2         | 73689  | subunit 2                                             | 3.61 | 1.86 | 0.01 |
| A_52_P555520 | NM_029742 | Klhdc10         | 76788  | kelch domain containing 10                            | 3.46 | 1.86 | 0.01 |
| A_52_P265889 | NM_009119 | Sap18           | 20220  | Sin3-associated polypeptide 18                        | 2.85 | 1.86 | 0.05 |
| A_51_P169693 | NM_198095 | Bst2            | 69550  | bone marrow stromal cell antigen 2                    | 2.80 | 1.85 | 0.05 |
| A_52_P103513 | BC083148  | Rpl13           | 270106 | ribosomal protein L13                                 | 4.06 | 1.85 | 0.00 |
| A_52_P683146 | NM_009866 | Cdh11           | 12552  | cadherin 11                                           | 3.50 | 1.85 | 0.01 |
| A_51_P236013 | NM_172281 | Rnf40           | 233900 | ring finger protein 40                                | 4.07 | 1.85 | 0.00 |
| A_52_P530958 | NM_027353 | Cd2bp2          | 70233  | CD2 antigen (cytoplasmic tail) binding protein 2      | 3.29 | 1.85 | 0.01 |
|              |           |                 |        | potassium channel tetramerisation domain containing   |      |      |      |
| A_51_P398406 | NM_172747 | Kctd13          | 233877 | 13                                                    | 4.58 | 1.85 | 0.00 |
| A_51_P219918 | NM_172383 | Tmem125         | 230678 | transmembrane protein 125                             | 2.76 | 1.85 | 0.06 |
| A_51_P417109 | NM_009558 | Zfp51           | 22709  | zinc finger protein 51                                | 2.75 | 1.85 | 0.06 |

|               |           |                |        |                                                        |      |      |      |
|---------------|-----------|----------------|--------|--------------------------------------------------------|------|------|------|
| A_52_P456664  | AK014677  | 4833411C071624 |        | RIKEN cDNA 4833411C07 gene                             | 3.00 | 1.85 | 0.03 |
| A_51_P412955  | AK044842  | Plcb4          | 18798  | phospholipase C, beta 4                                | 3.84 | 1.85 | 0.00 |
|               |           |                |        | mediator of RNA polymerase II transcription, subunit 9 |      |      |      |
| A_51_P496400  | NM_138675 | Med9           | 192191 | homolog (yeast)                                        | 5.09 | 1.85 | 0.00 |
| A_51_P498866  | NM_053168 | Trim11         | 94091  | tripartite motif-containing 11                         | 3.32 | 1.85 | 0.01 |
| A_51_P271354  | NM_030178 | Brpf1          | 78783  | bromodomain and PHD finger containing, 1               | 4.27 | 1.85 | 0.00 |
| A_51_P250590  | AK080963  | Sbf2           | 319934 | SET binding factor 2                                   | 2.96 | 1.85 | 0.03 |
| A_52_P86693   | NM_026790 | Ifi2711        | 52668  | interferon, alpha-inducible protein 27 like 1          | 3.49 | 1.85 | 0.01 |
| A_52_P363951  | NM_011580 | Thbs1          | 21825  | thrombospondin 1                                       | 2.91 | 1.85 | 0.04 |
| A_51_P242400  | NM_031170 | Krt8           | 16691  | keratin 8                                              | 4.05 | 1.85 | 0.00 |
| A_51_P223666  | NM_007951 | Erh            | 13877  | enhancer of rudimentary homolog (Drosophila)           | 3.82 | 1.85 | 0.00 |
| A_51_P431919  | NM_019678 | Tfg            | 21787  | Trk-fused gene                                         | 2.72 | 1.85 | 0.07 |
| A_52_P312563  | NM_026440 | Rnmt           | 67897  | RNA (guanine-7-) methyltransferase                     | 3.60 | 1.85 | 0.01 |
| A_51_P266168  | NM_001039 | Eif4e2         | 26987  | eukaryotic translation initiation factor 4E member 2   | 4.95 | 1.85 | 0.00 |
| A_52_P582814  | BC010602  | H2-gs10        | 436493 | MHC class I like protein GS10                          | 3.80 | 1.85 | 0.00 |
| A_51_P279531  | NM_133795 | Ttc1           | 66827  | tetratricopeptide repeat domain 1                      | 3.99 | 1.85 | 0.00 |
| A_51_P242399  | NM_031170 | Krt8           | 16691  | keratin 8                                              | 3.91 | 1.84 | 0.00 |
| A_51_P124089  | NM_019581 | Gtpbp2         | 56055  | GTP binding protein 2                                  | 3.12 | 1.84 | 0.02 |
| A_51_P499441  | NM_178900 | Prkd2          | 101540 | protein kinase D2                                      | 3.35 | 1.84 | 0.01 |
| A_51_P246705  | NM_029278 | Nop14          | 75416  | NOP14 nucleolar protein homolog (yeast)                | 3.81 | 1.84 | 0.00 |
| A_52_P212887  | NM_182939 | Ppp4r2         | 232314 | protein phosphatase 4, regulatory subunit 2            | 3.87 | 1.84 | 0.00 |
| A_51_P364140  | NM_010699 | Ldha           | 16828  | lactate dehydrogenase A                                | 5.66 | 1.84 | 0.00 |
| A_52_P1114640 | AK010368  | 2410003L1      | 69729  | RIKEN cDNA 2410003L11 gene                             | 4.08 | 1.84 | 0.00 |
| A_52_P123485  | NM_025804 | Tcf25          | 66855  | transcription factor 25 (basic helix-loop-helix)       | 4.21 | 1.84 | 0.00 |
| A_51_P218814  | NM_026517 | Rpl22l1        | 68028  | ribosomal protein L22 like 1                           | 3.94 | 1.84 | 0.00 |
| A_52_P640152  | AK134636  | 6820431F2      | 381598 | cadherin 11 pseudogene                                 | 3.47 | 1.84 | 0.01 |
| A_51_P464146  | NM_175270 | Ankrd56        | 78088  | ankyrin repeat domain 56                               | 2.76 | 1.84 | 0.06 |
| A_52_P140546  | NM_025772 | Dtnbp1         | 94245  | dystrobrevin binding protein 1                         | 5.51 | 1.84 | 0.00 |
| A_52_P356562  | NA        | NA             | NA     | NA                                                     | 4.05 | 1.84 | 0.00 |
| A_51_P298946  | NM_019770 | Tmed2          | 56334  | transmembrane emp24 domain trafficking protein 2       | 3.28 | 1.84 | 0.01 |
| A_52_P323820  | NM_026435 | Ufm1           | 67890  | ubiquitin-fold modifier 1                              | 3.34 | 1.84 | 0.01 |
| A_52_P21574   | AK033091  | Pdlim7         | 67399  | PDZ and LIM domain 7                                   | 3.13 | 1.84 | 0.02 |

|              |           |           |        |                                                         |      |      |      |
|--------------|-----------|-----------|--------|---------------------------------------------------------|------|------|------|
| A_52_P963966 | AK048646  | NA        | NA     | NA                                                      | 4.20 | 1.84 | 0.00 |
| A_52_P407854 | BC093523  | Dda1      | 66498  | DET1 and DDB1 associated 1                              | 4.08 | 1.84 | 0.00 |
| A_52_P578581 | NM_170599 | Igsf11    | 207683 | immunoglobulin superfamily, member 11                   | 3.20 | 1.84 | 0.02 |
| A_51_P477440 | NM_001029 | Sec23ip   | 207352 | Sec23 interacting protein                               | 2.84 | 1.84 | 0.05 |
| A_51_P521161 | NM_007596 | Caml      | 12328  | calcium modulating ligand                               | 4.02 | 1.84 | 0.00 |
| A_52_P552893 | NM_026676 | 0610007P2 | 68327  | RIKEN cDNA 0610007P22 gene                              | 3.07 | 1.83 | 0.02 |
| A_52_P238873 | BC098509  | 3110003A1 | 73112  | RIKEN cDNA 3110003A17 gene                              | 2.86 | 1.83 | 0.05 |
| A_51_P418560 | NM_080795 | Lnx2      | 140887 | ligand of numb-protein X 2                              | 2.92 | 1.83 | 0.04 |
| A_51_P288906 | NM_019765 | Clip1     | 56430  | CAP-GLY domain containing linker protein 1              | 4.75 | 1.83 | 0.00 |
| A_51_P514623 | NM_025422 | Cd302     | 66205  | CD302 antigen                                           | 3.75 | 1.83 | 0.00 |
|              |           |           |        | NIMA (never in mitosis gene a)-related expressed kinase |      |      |      |
| A_51_P295442 | NM_021605 | Nek7      | 59125  | 7                                                       | 3.51 | 1.83 | 0.01 |
| A_51_P425373 | NM_028047 | 1500002O2 | 71997  | RIKEN cDNA 1500002O20 gene                              | 3.87 | 1.83 | 0.00 |
| A_52_P223495 | NM_010576 | Itga4     | 16401  | integrin alpha 4                                        | 3.70 | 1.83 | 0.01 |
| A_52_P46588  | AK163124  | A630072M  | 320770 | RIKEN cDNA A630072M18 gene                              | 4.10 | 1.83 | 0.00 |
| A_51_P345196 | NM_026116 | Bbs2      | 67378  | Bardet-Biedl syndrome 2 (human)                         | 2.86 | 1.83 | 0.05 |
| A_51_P229076 | NM_009847 | Cd2ap     | 12488  | CD2-associated protein                                  | 3.26 | 1.83 | 0.01 |
|              |           |           |        | solute carrier family 11 (proton-coupled divalent metal |      |      |      |
| A_52_P254298 | NM_008732 | Slc11a2   | 18174  | ion transporters), member 2                             | 4.09 | 1.83 | 0.00 |
| A_51_P397493 | NM_017401 | Polm      | 54125  | polymerase (DNA directed), mu                           | 2.98 | 1.83 | 0.03 |
| A_51_P504490 | NM_172762 | Rbm34     | 52202  | RNA binding motif protein 34                            | 3.28 | 1.83 | 0.01 |
|              |           |           |        | signal transducing adaptor molecule (SH3 domain and     |      |      |      |
| A_52_P128982 | NM_011484 | Stam      | 20844  | ITAM motif) 1                                           | 4.09 | 1.83 | 0.00 |
| A_51_P237754 | NM_010398 | H2-T23    | 15040  | histocompatibility 2, T region locus 23                 | 4.06 | 1.83 | 0.00 |
| A_51_P146382 | NM_001024 | NA        | NA     | NA                                                      | 3.84 | 1.83 | 0.00 |
| A_51_P209319 | NM_016752 | Slc35b1   | 110172 | solute carrier family 35, member B1                     | 3.85 | 1.83 | 0.00 |
| A_51_P188073 | NA        | NA        | NA     | NA                                                      | 2.80 | 1.83 | 0.05 |
| A_52_P451073 | NM_178589 | Tnfrsf21  | 94185  | tumor necrosis factor receptor superfamily, member 21   | 4.04 | 1.83 | 0.00 |
| A_51_P281255 | NM_016777 | Nasp      | 50927  | nuclear autoantigenic sperm protein (histone-binding)   | 4.15 | 1.83 | 0.00 |
|              |           |           |        | dual specificity phosphatase 11 (RNA/RNP complex 1-     |      |      |      |
| A_52_P215136 | NM_028099 | Dusp11    | 72102  | interacting)                                            | 4.91 | 1.82 | 0.00 |
| A_51_P137419 | NM_009977 | Cst7      | 13011  | cystatin F (leukocystatin)                              | 5.63 | 1.82 | 0.00 |

|              |           |          |        |                                                                          |      |      |      |
|--------------|-----------|----------|--------|--------------------------------------------------------------------------|------|------|------|
| A_51_P183940 | NM_016866 | Stk39    | 53416  | serine/threonine kinase 39, STE20/SPS1 homolog (yeast)                   | 3.67 | 1.82 | 0.01 |
| A_51_P239838 | NA        | NA       | NA     | NA                                                                       | 2.72 | 1.82 | 0.07 |
| A_51_P234113 | NM_172729 | Nod1     | 107607 | nucleotide-binding oligomerization domain containing 1                   | 4.10 | 1.82 | 0.00 |
| A_52_P586004 | NM_001033 | Hk3      | 212032 | hexokinase 3                                                             | 3.41 | 1.82 | 0.01 |
| A_51_P169617 | NM_027748 | Taf3     | 209361 | TAF3 RNA polymerase II, TATA box binding protein (TBP)-associated factor | 2.91 | 1.82 | 0.04 |
| A_51_P444565 | NA        | NA       | NA     | NA                                                                       | 3.51 | 1.82 | 0.01 |
| A_51_P177502 | NM_172284 | Ddx19b   | 234733 | DEAD (Asp-Glu-Ala-Asp) box polypeptide 19b                               | 3.84 | 1.82 | 0.00 |
| A_51_P346826 | NM_017475 | Rragc    | 54170  | Ras-related GTP binding C                                                | 3.01 | 1.82 | 0.03 |
| A_51_P483118 | NM_016660 | Hmga1    | 15361  | high mobility group AT-hook 1                                            | 3.05 | 1.82 | 0.02 |
| A_51_P380881 | NM_033609 | Med15    | 94112  | mediator complex subunit 15                                              | 3.42 | 1.82 | 0.01 |
| A_51_P237575 | NM_023423 | Akirin1  | 68050  | akirin 1                                                                 | 3.17 | 1.82 | 0.02 |
| A_51_P195023 | NM_144886 | Exosc2   | 227715 | exosome component 2                                                      | 3.82 | 1.82 | 0.00 |
| A_52_P217710 | NM_008056 | Fzd6     | 14368  | frizzled homolog 6 (Drosophila)                                          | 2.95 | 1.82 | 0.03 |
| A_52_P562612 | AK082819  | Srd5a1   | 78925  | steroid 5 alpha-reductase 1                                              | 2.92 | 1.82 | 0.04 |
| A_51_P235311 | NM_009438 | Rpl13a   | 22121  | ribosomal protein L13A                                                   | 3.73 | 1.82 | 0.01 |
| A_52_P2259   | D89901    | Krtap6-3 | 1E+08  | keratin associated protein 6-3                                           | 3.61 | 1.82 | 0.01 |
| A_52_P113129 | NM_016775 | Dnajc5   | 13002  | Dnaj (Hsp40) homolog, subfamily C, member 5                              | 3.24 | 1.82 | 0.01 |
| A_52_P10781  | AK011495  | Lman1    | 70361  | lectin, mannose-binding, 1                                               | 2.82 | 1.82 | 0.05 |
| A_52_P436238 | NM_013614 | Odc1     | 18263  | ornithine decarboxylase, structural 1                                    | 3.30 | 1.82 | 0.01 |
| A_51_P221274 | NM_013784 | Pign     | 27392  | phosphatidylinositol glycan anchor biosynthesis, class N                 | 4.07 | 1.82 | 0.00 |
| A_52_P636629 | AK037771  | Ubr1     | 22222  | ubiquitin protein ligase E3 component n-recognin 1                       | 3.33 | 1.82 | 0.01 |
| A_52_P306792 | NM_153419 | Grwd1    | 101612 | glutamate-rich WD repeat containing 1                                    | 2.88 | 1.82 | 0.04 |
| A_51_P254906 | NM_178682 | 4933426M | 217684 | RIKEN cDNA 4933426M11 gene                                               | 4.14 | 1.82 | 0.00 |
| A_52_P191193 | NM_172595 | Arl15    | 218639 | ADP-ribosylation factor-like 15                                          | 3.00 | 1.81 | 0.03 |
| A_51_P483690 | X61450    | Napb     | 17957  | N-ethylmaleimide sensitive fusion protein attachment protein beta        | 3.58 | 1.81 | 0.01 |
| A_51_P145433 | NM_011699 | Lin7c    | 22343  | lin-7 homolog C (C. elegans)                                             | 2.82 | 1.81 | 0.05 |
| A_51_P368237 | BC023155  | Dnahc1   | 110084 | dynein, axonemal, heavy chain 1                                          | 3.38 | 1.81 | 0.01 |
| A_52_P568028 | NM_011986 | Ncdn     | 26562  | neurochondrin                                                            | 3.40 | 1.81 | 0.01 |

|              |            |           |        |                                                                    |      |      |      |
|--------------|------------|-----------|--------|--------------------------------------------------------------------|------|------|------|
| A_51_P350252 | XM_885736  | NA        | NA     | NA                                                                 | 3.63 | 1.81 | 0.01 |
|              |            |           |        | ATPase, Ca <sup>++</sup> transporting, cardiac muscle, slow twitch |      |      |      |
| A_51_P451075 | NM_009722  | Atp2a2    | 11938  | 2                                                                  | 4.03 | 1.81 | 0.00 |
| A_51_P485410 | NM_001001  | Zscan22   | 232878 | zinc finger and SCAN domain containing 22                          | 2.73 | 1.81 | 0.07 |
| A_52_P539361 | NM_001033  | 2610002J0 | 67513  | RIKEN cDNA 2610002J02 gene                                         | 4.05 | 1.81 | 0.00 |
|              |            |           |        | pleckstrin homology domain containing, family A                    |      |      |      |
| A_52_P215469 | NM_133942  | Plekha1   | 101476 | (phosphoinositide binding specific) member 1                       | 3.95 | 1.81 | 0.00 |
| A_51_P417186 | NM_020483  | Sap30bp   | 57230  | SAP30 binding protein                                              | 4.54 | 1.81 | 0.00 |
| A_51_P361675 | AK047998   | Dopey1    | 320615 | dopey family member 1                                              | 2.92 | 1.81 | 0.04 |
| A_51_P142465 | NM_011239  | Ranbp1    | 19385  | RAN binding protein 1                                              | 3.36 | 1.81 | 0.01 |
| A_52_P380502 | NM_201385  | Plec      | 18810  | plectin                                                            | 2.86 | 1.81 | 0.05 |
| A_51_P174894 | BC050941   | Mkl1      | 223701 | MKL (megakaryoblastic leukemia)/myocardin-like 1                   | 2.91 | 1.81 | 0.04 |
| A_52_P23212  | NM_009637  | Aebp2     | 11569  | AE binding protein 2                                               | 4.00 | 1.81 | 0.00 |
| A_51_P298323 | NM_173737  | 8430410A1 | 232210 | RIKEN cDNA 8430410A17 gene                                         | 3.77 | 1.81 | 0.00 |
|              |            |           |        | TAF5-like RNA polymerase II, p300/CBP-associated                   |      |      |      |
| A_52_P49368  | NM_133966  | Taf5l     | 102162 | factor (PCAF)-associated factor                                    | 2.97 | 1.81 | 0.03 |
| A_52_P185217 | NM_026040  | Srfbp1    | 67222  | serum response factor binding protein 1                            | 3.09 | 1.81 | 0.02 |
|              |            |           |        | microtubule-associated protein, RP/EB family, member               |      |      |      |
| A_51_P375714 | NM_007896  | Mapre1    | 13589  | 1                                                                  | 3.91 | 1.81 | 0.00 |
| A_51_P137808 | AB010345   | Zfp26     | 22688  | zinc finger protein 26                                             | 3.08 | 1.81 | 0.02 |
| A_52_P602180 | NA         | NA        | NA     | NA                                                                 | 4.74 | 1.81 | 0.00 |
| A_52_P603900 | NM_024436  | Rab22a    | 19334  | RAB22A, member RAS oncogene family                                 | 2.84 | 1.81 | 0.05 |
| A_52_P328714 | AK133758   | Fbxw2     | 30050  | F-box and WD-40 domain protein 2                                   | 3.20 | 1.81 | 0.02 |
| A_52_P366696 | NM_026983  | Erp27     | 69187  | endoplasmic reticulum protein 27                                   | 4.10 | 1.81 | 0.00 |
| A_52_P207654 | NA         | NA        | NA     | NA                                                                 | 3.16 | 1.81 | 0.02 |
|              |            |           |        | proteasome (prosome, macropain) 26S subunit, non-                  |      |      |      |
| A_51_P130427 | NM_009439  | Psmd3     | 22123  | ATPase, 3                                                          | 4.29 | 1.81 | 0.00 |
| A_52_P300730 | NM_178057  | NA        | NA     | NA                                                                 | 2.93 | 1.81 | 0.04 |
| A_52_P492081 | NM_130447  | Dusp16    | 70686  | dual specificity phosphatase 16                                    | 3.37 | 1.81 | 0.01 |
|              |            |           |        | FCF1 small subunit (SSU) processome component                      |      |      |      |
| A_51_P153787 | NM_028632  | Fcf1      | 73736  | homolog ( <i>S. cerevisiae</i> )                                   | 4.19 | 1.80 | 0.00 |
| A_52_P45175  | XM_0010011 | Trip11    | 109181 | thyroid hormone receptor interactor 11                             | 2.94 | 1.80 | 0.04 |
| A_52_P98387  | NM_007438  | Aldoa     | 11674  | aldolase A, fructose-bisphosphate                                  | 3.14 | 1.80 | 0.02 |

|              |           |          |        |                                                                                                        |      |      |      |
|--------------|-----------|----------|--------|--------------------------------------------------------------------------------------------------------|------|------|------|
| A_51_P425798 | NM_029920 | Mtus2    | 77521  | microtubule associated tumor suppressor candidate 2                                                    | 2.92 | 1.80 | 0.04 |
| A_51_P288839 | NM_138604 | Otud5    | 54644  | OTU domain containing 5                                                                                | 3.15 | 1.80 | 0.02 |
| A_52_P391081 | NM_172162 | Hinfp    | 102423 | histone H4 transcription factor                                                                        | 4.02 | 1.80 | 0.00 |
| A_51_P403881 | NM_011574 | Cirh1a   | 21771  | cirrhosis, autosomal recessive 1A (human)                                                              | 3.79 | 1.80 | 0.00 |
| A_52_P437363 | NM_027892 | Ppp1r12a | 17931  | protein phosphatase 1, regulatory (inhibitor) subunit 12A                                              | 2.76 | 1.80 | 0.06 |
| A_52_P448936 | AK078894  | Ppp2r5e  | 26932  | protein phosphatase 2, regulatory subunit B (B56), epsilon isoform                                     | 2.95 | 1.80 | 0.03 |
| A_51_P283754 | NM_172302 | Cpsf7    | 269061 | cleavage and polyadenylation specific factor 7                                                         | 2.82 | 1.80 | 0.05 |
| A_52_P269334 | AK089458  | Rdh13    | 108841 | retinol dehydrogenase 13 (all-trans and 9-cis)                                                         | 4.59 | 1.80 | 0.00 |
| A_51_P359333 | NM_010209 | Fh1      | 14194  | fumarate hydratase 1                                                                                   | 3.98 | 1.80 | 0.00 |
| A_52_P403484 | BC008269  | Ptpn2    | 19255  | protein tyrosine phosphatase, non-receptor type 2 proteasome (prosome, macropain) 26S subunit, ATPase, | 3.72 | 1.80 | 0.01 |
| A_52_P10254  | NM_011874 | Psmc4    | 23996  | 4                                                                                                      | 4.14 | 1.80 | 0.00 |
| A_51_P483544 | NM_013930 | Aass     | 30956  | aminoadipate-semialdehyde synthase                                                                     | 4.57 | 1.80 | 0.00 |
| A_51_P405956 | NA        | NA       | NA     | NA                                                                                                     | 3.07 | 1.80 | 0.02 |
| A_51_P415809 | NM_026954 | Tusc1    | 69136  | tumor suppressor candidate 1                                                                           | 4.39 | 1.80 | 0.00 |
| A_51_P514668 | NM_025527 | Srp19    | 66384  | signal recognition particle 19                                                                         | 3.21 | 1.80 | 0.02 |
| A_52_P14496  | AK132653  | Gm9880   | 1E+08  | predicted gene 9880                                                                                    | 3.46 | 1.80 | 0.01 |
| A_52_P73848  | NM_001045 | Clint1   | 216705 | clathrin interactor 1                                                                                  | 2.75 | 1.80 | 0.06 |
| A_51_P248441 | NM_019803 | Ube2g2   | 22213  | ubiquitin-conjugating enzyme E2G 2                                                                     | 4.34 | 1.80 | 0.00 |
| A_51_P333060 | NM_148948 | Dicer1   | 192119 | Dicer1, Dcr-1 homolog (Drosophila)                                                                     | 3.83 | 1.80 | 0.00 |
| A_52_P83363  | AK015025  | Ralgapa1 | 56784  | Ral GTPase activating protein, alpha subunit 1                                                         | 2.88 | 1.80 | 0.04 |
| A_52_P245911 | NA        | NA       | NA     | NA                                                                                                     | 4.46 | 1.80 | 0.00 |
| A_52_P572284 | NM_008640 | Laptm4a  | 17775  | lysosomal-associated protein transmembrane 4A                                                          | 2.93 | 1.80 | 0.04 |
| A_52_P565940 | NM_008739 | Nsd1     | 18193  | nuclear receptor-binding SET-domain protein 1                                                          | 3.01 | 1.80 | 0.03 |
| A_52_P378257 | XM_283937 | NA       | NA     | NA                                                                                                     | 3.65 | 1.80 | 0.01 |
| A_52_P461722 | NM_181650 | Prdm4    | 72843  | PR domain containing 4                                                                                 | 3.02 | 1.80 | 0.03 |
| A_51_P420453 | NM_145426 | Mfap3    | 216760 | microfibrillar-associated protein 3                                                                    | 4.95 | 1.80 | 0.00 |
| A_52_P327467 | NM_025426 | Med7     | 66213  | mediator complex subunit 7                                                                             | 4.29 | 1.80 | 0.00 |
| A_52_P103377 | BC071184  | Hnrpll   | 72692  | heterogeneous nuclear ribonucleoprotein L-like                                                         | 3.45 | 1.80 | 0.01 |



|              |           |           |        |                                                                                                      |      |      |      |
|--------------|-----------|-----------|--------|------------------------------------------------------------------------------------------------------|------|------|------|
| A_51_P510485 | BC046305  | Sfi1      | 78887  | Sfi1 homolog, spindle assembly associated (yeast) eukaryotic translation initiation factor 1A domain | 2.80 | 1.80 | 0.05 |
| A_51_P474688 | NM_027236 | Eif1ad    | 69860  | containing                                                                                           | 3.69 | 1.80 | 0.01 |
| A_52_P309337 | NM_019648 | Metap2    | 56307  | methionine aminopeptidase 2                                                                          | 2.78 | 1.80 | 0.05 |
| A_52_P567228 | XM_620268 | Cyp2w1    | 545817 | cytochrome P450, family 2, subfamily w, polypeptide 1                                                | 3.19 | 1.80 | 0.02 |
| A_52_P467291 | AK043151  | NA        | NA     | NA                                                                                                   | 3.11 | 1.79 | 0.02 |
| A_51_P249471 | AK035387  | 9530028C0 | 330256 | hypothetical protein 9530028C05                                                                      | 3.52 | 1.79 | 0.01 |
| A_51_P469433 | NM_011659 | Tnfrsf4   | 22163  | tumor necrosis factor receptor superfamily, member 4                                                 | 4.56 | 1.79 | 0.00 |
| A_52_P418056 | NM_207209 | Sec24b    | 99683  | Sec24 related gene family, member B ( <i>S. cerevisiae</i> )                                         | 2.73 | 1.79 | 0.07 |
| A_52_P412543 | NM_172502 | Dcaf15    | 212123 | DDB1 and CUL4 associated factor 15                                                                   | 3.12 | 1.79 | 0.02 |
| A_51_P207550 | NM_023196 | Pla2g12a  | 66350  | phospholipase A2, group X1IA                                                                         | 2.77 | 1.79 | 0.05 |
| A_51_P333885 | NM_019868 | Hnrnp2    | 56258  | heterogeneous nuclear ribonucleoprotein H2                                                           | 3.46 | 1.79 | 0.01 |
| A_51_P297165 | BC092058  | Sf3a3     | 75062  | splicing factor 3a, subunit 3                                                                        | 3.25 | 1.79 | 0.01 |
| A_51_P124477 | NM_133231 | Rfxap     | 170767 | regulatory factor X-associated protein                                                               | 4.12 | 1.79 | 0.00 |
| A_51_P251154 | BC016624  | NA        | NA     | NA                                                                                                   | 3.38 | 1.79 | 0.01 |
| A_52_P395220 | NM_026609 | Leprotl1  | 68192  | leptin receptor overlapping transcript-like 1                                                        | 4.92 | 1.79 | 0.00 |
| A_52_P17788  | NM_023233 | Trim13    | 66597  | tripartite motif-containing 13                                                                       | 2.91 | 1.79 | 0.04 |
| A_52_P455055 | XM_148244 | NA        | NA     | NA                                                                                                   | 3.85 | 1.79 | 0.00 |
| A_52_P456158 | NM_175684 | Fchsd1    | 319262 | FCH and double SH3 domains 1                                                                         | 3.23 | 1.79 | 0.02 |
| A_51_P116421 | NM_013790 | Abcc5     | 27416  | ATP-binding cassette, sub-family C (CFTR/MRP), member 5                                              | 4.28 | 1.79 | 0.00 |
| A_51_P267194 | NM_011810 | Faim      | 23873  | Fas apoptotic inhibitory molecule                                                                    | 3.72 | 1.79 | 0.01 |
| A_51_P510096 | NM_172593 | Mier3     | 218613 | mesoderm induction early response 1, family member 3                                                 | 3.61 | 1.79 | 0.01 |
| A_51_P176513 | NM_170592 | Mettl11a  | 66617  | methyltransferase like 11A                                                                           | 3.26 | 1.79 | 0.01 |
| A_51_P133651 | NM_031391 | Gtf2a1    | 83602  | general transcription factor II A, 1                                                                 | 3.72 | 1.79 | 0.01 |
| A_51_P192589 | NM_025443 | Pno1      | 66249  | partner of NOB1 homolog ( <i>S. cerevisiae</i> )                                                     | 3.13 | 1.79 | 0.02 |
| A_52_P189449 | NM_023743 | Eif4enif1 | 74203  | eukaryotic translation initiation factor 4E nuclear import factor 1                                  | 3.77 | 1.79 | 0.00 |
| A_52_P407751 | NM_148932 | Pom121    | 107939 | nuclear pore membrane protein 121                                                                    | 2.79 | 1.78 | 0.05 |

|              |           |            |        |                                                                  |      |      |      |
|--------------|-----------|------------|--------|------------------------------------------------------------------|------|------|------|
| A_51_P224593 | NM_026823 | Arl8a      | 68724  | ADP-ribosylation factor-like 8A                                  | 3.43 | 1.78 | 0.01 |
| A_52_P463578 | NM_026483 | Mphosph1   | 67973  | M-phase phosphoprotein 10 (U3 small nucleolar ribonucleoprotein) | 4.16 | 1.78 | 0.00 |
| A_51_P152191 | AK122486  | Xpo5       | 72322  | exportin 5                                                       | 3.91 | 1.78 | 0.00 |
| A_51_P181205 | NM_029418 | 9130401M01 | 75758  | RIKEN cDNA 9130401M01 gene                                       | 5.82 | 1.78 | 0.00 |
| A_51_P310254 | NM_133750 | Fam118a    | 73225  | family with sequence similarity 118, member A                    | 2.80 | 1.78 | 0.05 |
| A_52_P559034 | AK052765  | Klhdc5     | 232539 | kelch domain containing 5                                        | 4.07 | 1.78 | 0.00 |
| A_51_P482633 | NM_019924 | Rps6ka4    | 56613  | ribosomal protein S6 kinase, polypeptide 4                       | 3.90 | 1.78 | 0.00 |
| A_51_P131025 | NM_026890 | Ngdn       | 68966  | neuroguidin, EIF4E binding protein                               | 2.78 | 1.78 | 0.05 |
| A_51_P131358 | NM_009151 | Selplg     | 20345  | selectin, platelet (p-selectin) ligand                           | 3.48 | 1.78 | 0.01 |
| A_51_P264388 | NM_013931 | Mapk8ip3   | 30957  | mitogen-activated protein kinase 8 interacting protein 3         | 2.97 | 1.78 | 0.03 |
| A_51_P190765 | NM_025517 | Rtcd1      | 66368  | RNA terminal phosphate cyclase domain 1                          | 4.23 | 1.78 | 0.00 |
| A_51_P462692 | NM_001077 | Ptbp1      | 19205  | polypyrimidine tract binding protein 1                           | 3.55 | 1.78 | 0.01 |
| A_52_P83303  | NM_024183 | Fip1l1     | 66899  | FIP1 like 1 ( <i>S. cerevisiae</i> )                             | 3.09 | 1.78 | 0.02 |
| A_52_P542140 | AK005617  | Fam192a    | 102122 | family with sequence similarity 192, member A                    | 3.40 | 1.78 | 0.01 |
| A_51_P516728 | NM_010404 | Hap1       | 15114  | huntingtin-associated protein 1                                  | 3.37 | 1.78 | 0.01 |
| A_52_P284470 | NM_028156 | 1700001P01 | 72215  | RIKEN cDNA 1700001P01 gene                                       | 2.95 | 1.78 | 0.03 |
| A_52_P309657 | NA        | NA         | NA     | NA                                                               | 3.25 | 1.78 | 0.01 |
| A_52_P537566 | NM_177150 | Cenpt      | 320394 | centromere protein T                                             | 3.90 | 1.78 | 0.00 |
| A_51_P182662 | NM_010878 | Nck1       | 17973  | non-catalytic region of tyrosine kinase adaptor protein 1        | 3.22 | 1.78 | 0.02 |
| A_52_P652446 | AK036186  | NA         | NA     | NA                                                               | 2.80 | 1.78 | 0.05 |
| A_52_P654148 | BC050924  | Zmym4      | 67785  | zinc finger, MYM-type 4                                          | 3.39 | 1.78 | 0.01 |
| A_52_P396917 | AK044024  | Eml5       | 319670 | echinoderm microtubule associated protein like 5                 | 3.50 | 1.78 | 0.01 |
| A_52_P4347   | NM_145125 | Brwd1      | 93871  | bromodomain and WD repeat domain containing 1                    | 3.30 | 1.78 | 0.01 |
| A_52_P103639 | NM_133700 | Btbd10     | 68815  | BTB (POZ) domain containing 10                                   | 2.89 | 1.78 | 0.04 |
| A_51_P483329 | NM_172713 | Sdad1      | 231452 | SDA1 domain containing 1                                         | 2.83 | 1.78 | 0.05 |
| A_51_P502580 | NM_053169 | Trim16     | 94092  | tripartite motif-containing 16                                   | 3.62 | 1.77 | 0.01 |
| A_51_P388374 | NM_026141 | Ppil4      | 67418  | peptidylprolyl isomerase (cyclophilin)-like 4                    | 3.77 | 1.77 | 0.00 |
| A_51_P325836 | NM_017371 | Hpx        | 15458  | hemopexin                                                        | 3.51 | 1.77 | 0.01 |
| A_52_P682456 | AK082305  | Pex1       | 71382  | peroxisomal biogenesis factor 1                                  | 4.31 | 1.77 | 0.00 |

|               |                    |        |                                                                                                               |      |      |      |
|---------------|--------------------|--------|---------------------------------------------------------------------------------------------------------------|------|------|------|
| A_52_P558357  | NM_001033: Dcp1b   | 319618 | DCP1 decapping enzyme homolog b ( <i>S. cerevisiae</i> )                                                      | 3.61 | 1.77 | 0.01 |
| A_51_P176517  | NM_170592 Mettl11a | 66617  | methyltransferase like 11A                                                                                    | 4.85 | 1.77 | 0.00 |
| A_51_P512561  | NM_013844 Zfp68    | 24135  | zinc finger protein 68                                                                                        | 3.11 | 1.77 | 0.02 |
| A_52_P268134  | XR_004355 NA       | NA     | NA                                                                                                            | 4.24 | 1.77 | 0.00 |
| A_51_P330369  | NM_138744 Ssx2ip   | 99167  | synovial sarcoma, X breakpoint 2 interacting protein<br>pleckstrin homology domain containing, family M (with | 3.15 | 1.77 | 0.02 |
| A_52_P544539  | AK156652 Plekhm2   | 69582  | RUN domain) member 2                                                                                          | 2.90 | 1.77 | 0.04 |
| A_51_P493234  | NM_007752 Cp       | 12870  | ceruloplasmin                                                                                                 | 3.52 | 1.77 | 0.01 |
| A_51_P518621  | NM_013550 Hist1h3a | 360198 | histone cluster 1, H3a                                                                                        | 4.35 | 1.77 | 0.00 |
| A_52_P480939  | NM_178716 Tnp1     | 238799 | transportin 1                                                                                                 | 4.04 | 1.77 | 0.00 |
| A_51_P483589  | NM_198162 Morc2a   | 74522  | microrchidia 2A                                                                                               | 2.86 | 1.77 | 0.05 |
| A_52_P366525  | NM_001039 Coq10b   | 67876  | coenzyme Q10 homolog B ( <i>S. cerevisiae</i> )                                                               | 3.16 | 1.77 | 0.02 |
| A_52_P366572  | NM_153567 Slain2   | 75991  | SLAIN motif family, member 2                                                                                  | 2.98 | 1.77 | 0.03 |
| A_52_P1116185 | AK051921 NA        | NA     | NA                                                                                                            | 3.27 | 1.77 | 0.01 |
| A_51_P381522  | NM_020331 Gtf2ird1 | 57080  | general transcription factor II I repeat domain-<br>containing 1                                              | 2.96 | 1.77 | 0.03 |
| A_51_P257960  | NM_011967 Psma5    | 26442  | proteasome (prosome, macropain) subunit, alpha type<br>5                                                      | 4.47 | 1.76 | 0.00 |
| A_52_P113126  | AK035288 Dnajc5    | 13002  | Dnaj (Hsp40) homolog, subfamily C, member 5                                                                   | 3.10 | 1.76 | 0.02 |
| A_51_P498922  | NM_026106 Dr1      | 13486  | down-regulator of transcription 1                                                                             | 3.20 | 1.76 | 0.02 |
| A_52_P199011  | NM_029456 Saps3    | 52036  | SAPS domain family, member 3                                                                                  | 2.80 | 1.76 | 0.05 |
| A_52_P507368  | NM_026231 Gstcd    | 67553  | glutathione S-transferase, C-terminal domain containing                                                       | 3.73 | 1.76 | 0.01 |
| A_52_P458229  | AK129078 Rrp1b     | 72462  | ribosomal RNA processing 1 homolog B ( <i>S. cerevisiae</i> )                                                 | 3.77 | 1.76 | 0.00 |
| A_52_P125467  | NM_144865 Reep2    | 225362 | receptor accessory protein 2                                                                                  | 3.41 | 1.76 | 0.01 |
| A_52_P183038  | NM_011829 Impdh1   | 23917  | inosine 5'-phosphate dehydrogenase 1                                                                          | 3.02 | 1.76 | 0.03 |
| A_51_P388432  | NM_130889 Anp32b   | 67628  | acidic (leucine-rich) nuclear phosphoprotein 32 family,<br>member B                                           | 4.29 | 1.76 | 0.00 |
| A_52_P205991  | NM_008142 Gnb1     | 14688  | guanine nucleotide binding protein (G protein), beta 1                                                        | 2.73 | 1.76 | 0.07 |
| A_51_P154997  | NM_134155 Brms1    | 107392 | breast cancer metastasis-suppressor 1                                                                         | 3.22 | 1.76 | 0.02 |

|              |           |          |        |                                                                                                |      |      |      |
|--------------|-----------|----------|--------|------------------------------------------------------------------------------------------------|------|------|------|
| A_51_P135066 | NM_027992 | Tmem106b | 71900  | transmembrane protein 106B                                                                     | 2.79 | 1.76 | 0.05 |
| A_51_P267370 | NM_022417 | Itn2c    | 64294  | integral membrane protein 2C                                                                   | 2.90 | 1.76 | 0.04 |
| A_52_P482925 | NM_025814 | Serbp1   | 66870  | serpine1 mRNA binding protein 1                                                                | 3.20 | 1.76 | 0.02 |
| A_52_P442370 | NM_022328 | Mllt1    | 64144  | myeloid/lymphoid or mixed-lineage leukemia (trithorax homolog, Drosophila); translocated to, 1 | 3.26 | 1.76 | 0.01 |
| A_51_P336874 | NM_025272 | Atp6v0e  | 11974  | ATPase, H+ transporting, lysosomal V0 subunit E                                                | 4.44 | 1.76 | 0.00 |
| A_52_P641147 | NM_146002 | Rhbdd2   | 215160 | rhomboid domain containing 2                                                                   | 3.05 | 1.76 | 0.02 |
| A_51_P489413 | NM_025881 | Luc7l    | 66978  | Luc7 homolog (S. cerevisiae)-like                                                              | 3.07 | 1.76 | 0.02 |
| A_51_P317782 | NM_176843 | Ints5    | 109077 | integrator complex subunit 5                                                                   | 3.57 | 1.76 | 0.01 |
| A_51_P272617 | NM_146130 | Hnrnpa3  | 229279 | heterogeneous nuclear ribonucleoprotein A3                                                     | 3.31 | 1.76 | 0.01 |
| A_51_P327469 | NM_026533 | Rps13    | 68052  | ribosomal protein S13                                                                          | 3.06 | 1.76 | 0.02 |
| A_52_P336859 | AK088462  | Hnrnpk   | 15387  | heterogeneous nuclear ribonucleoprotein K                                                      | 2.98 | 1.76 | 0.03 |
| A_51_P101929 | NM_010705 | Lgals3   | 16854  | lectin, galactose binding, soluble 3                                                           | 2.99 | 1.76 | 0.03 |
| A_51_P178585 | NM_016775 | Dnajc5   | 13002  | Dnaj (Hsp40) homolog, subfamily C, member 5                                                    | 3.80 | 1.75 | 0.00 |
| A_52_P85945  | NM_008602 | Pias2    | 17344  | protein inhibitor of activated STAT 2                                                          | 3.57 | 1.75 | 0.01 |
| A_52_P483680 | AK079998  | Zmpste24 | 230709 | zinc metalloproteinase, STE24 homolog (S. cerevisiae)                                          | 2.92 | 1.75 | 0.04 |
| A_51_P237367 | NM_133942 | Plekha1  | 101476 | pleckstrin homology domain containing, family A (phosphoinositide binding specific) member 1   | 3.24 | 1.75 | 0.01 |
| A_51_P116130 | NM_019803 | Ube2g2   | 22213  | ubiquitin-conjugating enzyme E2G 2                                                             | 4.54 | 1.75 | 0.00 |
| A_52_P142208 | NM_023423 | Akirin1  | 68050  | akirin 1                                                                                       | 3.90 | 1.75 | 0.00 |
| A_52_P617186 | NM_025959 | Psmc6    | 67089  | proteasome (prosome, macropain) 26S subunit, ATPase, 6                                         | 3.75 | 1.75 | 0.00 |
| A_51_P489086 | XM_134209 | NA       | NA     | NA                                                                                             | 3.05 | 1.75 | 0.02 |
| A_52_P530979 | BC085235  | Hbs1l    | 56422  | Hbs1-like (S. cerevisiae)                                                                      | 2.90 | 1.75 | 0.04 |
| A_52_P49945  | NM_146239 | Cdk17    | 237459 | cyclin-dependent kinase 17                                                                     | 3.23 | 1.75 | 0.01 |
| A_52_P32402  | NM_025286 | Slc31a2  | 20530  | solute carrier family 31, member 2                                                             | 3.53 | 1.75 | 0.01 |
| A_51_P365578 | NM_016891 | Ppp2r1a  | 51792  | protein phosphatase 2 (formerly 2A), regulatory subunit A (PR 65), alpha isoform               | 2.83 | 1.75 | 0.05 |
| A_52_P39247  | NM_153198 | Hbp1     | 73389  | high mobility group box transcription factor 1                                                 | 2.96 | 1.75 | 0.03 |
| A_51_P195258 | NM_019426 | Atf7ip   | 54343  | activating transcription factor 7 interacting protein                                          | 3.37 | 1.75 | 0.01 |
| A_51_P389895 | NM_028787 | Slc35f5  | 74150  | solute carrier family 35, member F5                                                            | 3.68 | 1.75 | 0.01 |

|               |           |           |        |                                                     |      |      |      |
|---------------|-----------|-----------|--------|-----------------------------------------------------|------|------|------|
| A_52_P495139  | NM_025635 | Zwint     | 52696  | ZW10 interactor                                     | 4.44 | 1.75 | 0.00 |
| A_52_P85892   | NM_029502 | Cant1     | 76025  | calcium activated nucleotidase 1                    | 2.94 | 1.75 | 0.04 |
| A_51_P417321  | AK156842  | Zfp236    | 329002 | zinc finger protein 236                             | 3.01 | 1.75 | 0.03 |
| A_52_P30302   | AK032696  | 5830433M  | 67770  | RIKEN cDNA 5830433M19 gene                          | 2.93 | 1.75 | 0.04 |
| A_52_P85829   | NM_001024 | Tsku      | 244152 | tsukushin                                           | 3.33 | 1.75 | 0.01 |
| A_51_P165342  | NM_007585 | Anxa2     | 12306  | annexin A2                                          | 2.93 | 1.75 | 0.04 |
| A_51_P166107  | AK075904  | 2310051F0 | 108745 | RIKEN cDNA 2310051F07 gene                          | 3.70 | 1.75 | 0.01 |
| A_51_P374305  | NM_026557 | Rchy1     | 68098  | ring finger and CHY zinc finger domain containing 1 | 3.49 | 1.75 | 0.01 |
| A_51_P457980  | NA        | NA        | NA     | NA                                                  | 3.02 | 1.75 | 0.03 |
| A_51_P159171  | NM_172161 | Irak2     | 108960 | interleukin-1 receptor-associated kinase 2          | 2.74 | 1.75 | 0.06 |
| A_51_P520745  | NM_153544 | BC030867  | 217216 | cDNA sequence BC030867                              | 3.12 | 1.75 | 0.02 |
| A_52_P1196772 | AK087259  | Anxa2     | 12306  | annexin A2                                          | 3.27 | 1.75 | 0.01 |
| A_51_P232778  | NM_019661 | Ykt6      | 56418  | YKT6 homolog (S. Cerevisiae)                        | 3.37 | 1.75 | 0.01 |
| A_52_P89125   | AK042446  | Brd8      | 78656  | bromodomain containing 8                            | 3.42 | 1.74 | 0.01 |
| A_51_P499776  | NM_026603 | Denr      | 68184  | density-regulated protein                           | 4.25 | 1.74 | 0.00 |
| A_52_P269384  | NM_178065 | 1110018G0 | 68497  | RIKEN cDNA 1110018G07 gene                          | 4.62 | 1.74 | 0.00 |
| A_52_P395929  | NA        | NA        | NA     | NA                                                  | 3.77 | 1.74 | 0.00 |
| A_51_P450957  | NM_007392 | Acta2     | 11475  | actin, alpha 2, smooth muscle, aorta                | 2.94 | 1.74 | 0.04 |
| A_51_P453502  | NM_011420 | Smn1      | 20595  | survival motor neuron 1                             | 3.40 | 1.74 | 0.01 |
| A_52_P489729  | NM_016906 | Sec61a1   | 53421  | Sec61 alpha 1 subunit (S. cerevisiae)               | 3.34 | 1.74 | 0.01 |
| A_51_P131747  | AK147265  | Pcdh17    | 219228 | protocadherin 17                                    | 4.87 | 1.74 | 0.00 |
| A_52_P585475  | NM_180678 | Gars      | 353172 | glycyl-tRNA synthetase                              | 3.99 | 1.74 | 0.00 |
| A_52_P66596   | XM_205469 | Dmrtb1    | 56296  | DMRT-like family B with proline-rich C-terminal, 1  | 4.33 | 1.74 | 0.00 |
| A_52_P89884   | NM_001007 | Fndc3c1   | 333564 | fibronectin type III domain containing 3C1          | 3.85 | 1.74 | 0.00 |
| A_51_P431870  | NM_173013 | Mtap1s    | 270058 | microtubule-associated protein 1S                   | 3.63 | 1.74 | 0.01 |
| A_52_P617171  | BC029726  | 1600020E0 | 72012  | RIKEN cDNA 1600020E01 gene                          | 3.23 | 1.74 | 0.01 |
| A_52_P214126  | NM_009662 | Alox5     | 11689  | arachidonate 5-lipoxygenase                         | 3.85 | 1.74 | 0.00 |
| A_52_P549985  | AK008728  | Asb13     | 142688 | ankyrin repeat and SOCS box-containing 13           | 3.78 | 1.74 | 0.00 |
| A_51_P215106  | NM_008047 | Fstl1     | 14314  | folliculin-like 1                                   | 3.42 | 1.74 | 0.01 |
| A_52_P247927  | XM_901424 | 2810442I2 | 72735  | RIKEN cDNA 2810442I21 gene                          | 2.71 | 1.74 | 0.07 |
| A_51_P364485  | NM_009396 | Tnfaip2   | 21928  | tumor necrosis factor, alpha-induced protein 2      | 3.17 | 1.74 | 0.02 |

|              |           |           |        |                                                                 |      |      |      |
|--------------|-----------|-----------|--------|-----------------------------------------------------------------|------|------|------|
|              |           |           |        | tumor necrosis factor receptor superfamily, member              |      |      |      |
| A_51_P389028 | NM_020275 | Tnfrsf10b | 21933  | 10b                                                             | 3.60 | 1.74 | 0.01 |
| A_52_P507802 | NM_010336 | Lpar1     | 14745  | lysophosphatidic acid receptor 1                                | 3.31 | 1.74 | 0.01 |
| A_51_P187716 | AK003350  | Zc3h11a   | 70579  | zinc finger CCCH type containing 11A                            | 3.05 | 1.74 | 0.02 |
| A_52_P24593  | NM_029492 | Zdhhc20   | 75965  | zinc finger, DHHC domain containing 20                          | 2.85 | 1.74 | 0.05 |
| A_52_P264647 | XM_484000 | Gm6685    | 626571 | cytochrome b5 domain containing 1 pseudogene                    | 3.60 | 1.74 | 0.01 |
| A_52_P414013 | NM_153511 | Il1f9     | 215257 | interleukin 1 family, member 9                                  | 4.20 | 1.74 | 0.00 |
| A_52_P454246 | NM_133933 | Rpn1      | 103963 | ribophorin I                                                    | 3.32 | 1.74 | 0.01 |
| A_51_P377547 | NM_011529 | Tank      | 21353  | TRAF family member-associated Nf-kappa B activator              | 2.99 | 1.74 | 0.03 |
| A_51_P380514 | NM_028751 | Tjap1     | 74094  | tight junction associated protein 1                             | 4.41 | 1.74 | 0.00 |
| A_52_P512274 | XM_894696 | NA        | NA     | NA                                                              | 3.38 | 1.74 | 0.01 |
| A_51_P211943 | NM_023742 | Dtx2      | 74198  | deltex 2 homolog (Drosophila)                                   | 3.78 | 1.73 | 0.00 |
| A_52_P629821 | NM_178795 | Ppip5k1   | 327655 | diphosphoinositol pentakisphosphate kinase 1                    | 2.71 | 1.73 | 0.07 |
| A_52_P319149 | NM_027159 | Ccdc115   | 69668  | coiled-coil domain containing 115                               | 2.89 | 1.73 | 0.04 |
| A_52_P487024 | NM_001005 | Smg7      | 226517 | Smg-7 homolog, nonsense mediated mRNA decay factor (C. elegans) | 3.07 | 1.73 | 0.02 |
| A_52_P835592 | AK052047  | NA        | NA     | NA                                                              | 3.30 | 1.73 | 0.01 |
| A_51_P386382 | NM_025858 | Shisa5    | 66940  | shisa homolog 5 (Xenopus laevis)                                | 3.78 | 1.73 | 0.00 |
| A_52_P321847 | NM_021402 | Ube2j2    | 140499 | ubiquitin-conjugating enzyme E2, J2 homolog (yeast)             | 3.40 | 1.73 | 0.01 |
| A_51_P461947 | NM_177298 | Pisd      | 320951 | phosphatidylserine decarboxylase                                | 4.03 | 1.73 | 0.00 |
| A_52_P559975 | NM_009909 | Cxcr2     | 12765  | chemokine (C-X-C motif) receptor 2                              | 3.68 | 1.73 | 0.01 |
| A_52_P442228 | NM_008351 | Il12a     | 16159  | interleukin 12a                                                 | 4.22 | 1.73 | 0.00 |
| A_52_P560889 | NM_054056 | Pawr      | 114774 | PRKC, apoptosis, WT1, regulator                                 | 3.91 | 1.73 | 0.00 |
| A_51_P177819 | NM_030743 | Rnf114    | 81018  | ring finger protein 114                                         | 3.73 | 1.73 | 0.01 |
| A_52_P274238 | NM_021500 | Maea      | 59003  | macrophage erythroblast attacher                                | 4.70 | 1.73 | 0.00 |
| A_51_P264835 | NM_010148 | Epn2      | 13855  | epsin 2                                                         | 3.18 | 1.73 | 0.02 |
| A_52_P462358 | NM_199009 | Fam160a2  | 74349  | family with sequence similarity 160, member A2                  | 3.11 | 1.73 | 0.02 |
| A_52_P111145 | XM_143750 | NA        | NA     | NA                                                              | 3.41 | 1.73 | 0.01 |
| A_52_P411430 | XM_622446 | Gm5914    | 546100 | predicted gene 5914                                             | 3.34 | 1.73 | 0.01 |
| A_52_P253748 | NM_001024 | Zbtb45    | 232879 | zinc finger and BTB domain containing 45                        | 3.47 | 1.73 | 0.01 |
| A_52_P273998 | NM_027123 | Fastkd3   | 69577  | FAST kinase domains 3                                           | 3.97 | 1.73 | 0.00 |

|              |           |           |        |                                                        |      |      |      |
|--------------|-----------|-----------|--------|--------------------------------------------------------|------|------|------|
| A_52_P139478 | NM_025431 | Llph      | 66225  | LLP homolog, long-term synaptic facilitation (Aplysia) | 3.96 | 1.73 | 0.00 |
| A_51_P492070 | NM_133953 | Sf3b3     | 101943 | splicing factor 3b, subunit 3                          | 5.41 | 1.73 | 0.00 |
| A_51_P225083 | NM_153680 | Snx17     | 266781 | sorting nexin 17                                       | 4.12 | 1.73 | 0.00 |
| A_51_P467349 | AK048725  | Trim62    | 67525  | tripartite motif-containing 62                         | 2.83 | 1.73 | 0.05 |
| A_52_P477229 | NA        | NA        | NA     | NA                                                     | 3.31 | 1.73 | 0.01 |
| A_52_P597002 | NA        | NA        | NA     | NA                                                     | 2.78 | 1.73 | 0.05 |
| A_51_P281767 | AK157290  | Gm10492   | 1E+08  | predicted gene 10492                                   | 3.00 | 1.73 | 0.03 |
| A_52_P665202 | NA        | NA        | NA     | NA                                                     | 2.98 | 1.73 | 0.03 |
| A_52_P577019 | NM_170669 | Rps15a    | 267019 | ribosomal protein S15A                                 | 4.51 | 1.73 | 0.00 |
| A_51_P121447 | NM_054099 | 1110038F1 | 117171 | RIKEN cDNA 1110038F14 gene                             | 4.21 | 1.73 | 0.00 |
| A_51_P142258 | NM_133707 | 1810019J1 | 169073 | RIKEN cDNA 1810019J16 gene                             | 3.08 | 1.73 | 0.02 |
|              |           |           |        | G protein-coupled receptor, family C, group 5, member  |      |      |      |
| A_51_P461684 | NM_181444 | Gprc5a    | 232431 | A                                                      | 3.63 | 1.73 | 0.01 |
| A_52_P533198 | NM_009584 | Dnajc2    | 22791  | Dnaj (Hsp40) homolog, subfamily C, member 2            | 3.46 | 1.72 | 0.01 |
| A_52_P404979 | NA        | NA        | NA     | NA                                                     | 3.19 | 1.72 | 0.02 |
| A_52_P37665  | NM_025872 | Golt1b    | 66964  | golgi transport 1 homolog B (S. cerevisiae)            | 4.06 | 1.72 | 0.00 |
| A_51_P443508 | NM_026438 | Ppa1      | 67895  | pyrophosphatase (inorganic) 1                          | 3.54 | 1.72 | 0.01 |
| A_52_P404239 | NM_030147 | Brd8      | 78656  | bromodomain containing 8                               | 3.19 | 1.72 | 0.02 |
| A_52_P367060 | NM_183020 | Atxn2l    | 233871 | ataxin 2-like                                          | 3.44 | 1.72 | 0.01 |
| A_52_P560038 | NM_153589 | Ano2      | 243634 | anoctamin 2                                            | 3.79 | 1.72 | 0.00 |
| A_51_P404339 | NM_025588 | Exoc2     | 66482  | exocyst complex component 2                            | 3.76 | 1.72 | 0.00 |
| A_52_P615658 | NA        | NA        | NA     | NA                                                     | 3.67 | 1.72 | 0.01 |
| A_52_P612682 | NM_145956 | Brcc3     | 210766 | BRCA1/BRCA2-containing complex, subunit 3              | 3.32 | 1.72 | 0.01 |
| A_52_P621588 | NM_174851 | Il28ra    | 242700 | interleukin 28 receptor alpha                          | 4.35 | 1.72 | 0.00 |
| A_51_P375267 | U58884    | Dbnl      | 13169  | drebrin-like                                           | 3.52 | 1.72 | 0.01 |
| A_52_P205055 | XR_003742 | NA        | NA     | NA                                                     | 2.94 | 1.72 | 0.03 |
| A_51_P441286 | NM_177625 | Ttc5      | 219022 | tetratricopeptide repeat domain 5                      | 3.19 | 1.72 | 0.02 |
| A_52_P99502  | NM_029022 | Scrn3     | 74616  | secernin 3                                             | 3.52 | 1.72 | 0.01 |
| A_51_P255765 | NM_001039 | Coq10b    | 67876  | coenzyme Q10 homolog B (S. cerevisiae)                 | 3.18 | 1.72 | 0.02 |
| A_52_P292708 | NM_019437 | Rfk       | 54391  | riboflavin kinase                                      | 3.13 | 1.72 | 0.02 |
|              |           |           |        | general transcription factor II E, polypeptide 2 (beta |      |      |      |
| A_51_P404353 | NM_026584 | Gtf2e2    | 68153  | subunit)                                               | 2.80 | 1.72 | 0.05 |
| A_52_P650279 | NM_016906 | Sec61a1   | 53421  | Sec61 alpha 1 subunit (S. cerevisiae)                  | 4.11 | 1.72 | 0.00 |

|              |           |            |        |                                                                                                                       |      |      |      |
|--------------|-----------|------------|--------|-----------------------------------------------------------------------------------------------------------------------|------|------|------|
| A_51_P119055 | NM_009278 | Ssb        | 20823  | Sjogren syndrome antigen B                                                                                            | 3.61 | 1.72 | 0.01 |
| A_52_P376327 | NM_033565 | Aff4       | 93736  | AF4/FMR2 family, member 4                                                                                             | 4.03 | 1.72 | 0.00 |
| A_52_P389595 | NM_030711 | Erap1      | 80898  | endoplasmic reticulum aminopeptidase 1                                                                                | 3.15 | 1.72 | 0.02 |
| A_51_P191463 | NA        | NA         | NA     | NA                                                                                                                    | 3.37 | 1.72 | 0.01 |
| A_52_P677822 | NM_153059 | Tmem5      | 216395 | transmembrane protein 5                                                                                               | 3.53 | 1.71 | 0.01 |
| A_51_P215570 | NM_145577 | Zfp772     | 232855 | zinc finger protein 772                                                                                               | 3.41 | 1.71 | 0.01 |
| A_52_P12877  | NM_031165 | Hspa8      | 15481  | heat shock protein 8                                                                                                  | 3.13 | 1.71 | 0.02 |
| A_51_P411061 | XM_203796 | NA         | NA     | NA                                                                                                                    | 3.31 | 1.71 | 0.01 |
| A_52_P580974 | NM_130863 | Adrbk1     | 110355 | adrenergic receptor kinase, beta 1                                                                                    | 3.70 | 1.71 | 0.01 |
| A_52_P630473 | XM_126489 | NA         | NA     | NA                                                                                                                    | 4.54 | 1.71 | 0.00 |
| A_52_P362277 | NM_025546 | Rsl1d1     | 66409  | ribosomal L1 domain containing 1                                                                                      | 3.05 | 1.71 | 0.02 |
| A_52_P379889 | NM_207214 | Exoc5      | 105504 | exocyst complex component 5                                                                                           | 2.77 | 1.71 | 0.06 |
| A_51_P278519 | NM_023268 | Qsox1      | 104009 | quiescin Q6 sulfhydryl oxidase 1                                                                                      | 3.73 | 1.71 | 0.01 |
| A_52_P275348 | NM_029012 | Sppl3      | 74585  | signal peptide peptidase 3                                                                                            | 3.55 | 1.71 | 0.01 |
| A_51_P210474 | NM_026310 | Mrpl18     | 67681  | mitochondrial ribosomal protein L18                                                                                   | 3.27 | 1.71 | 0.01 |
| A_51_P347764 | NM_021315 | Noc3l      | 57753  | nucleolar complex associated 3 homolog ( <i>S. cerevisiae</i> )<br>Smg-7 homolog, nonsense mediated mRNA decay factor | 2.99 | 1.71 | 0.03 |
| A_52_P589268 | NM_001005 | Smg7       | 226517 | ( <i>C. elegans</i> )                                                                                                 | 3.18 | 1.71 | 0.02 |
| A_51_P504237 | NM_023220 | 2010106G01 | 66552  | RIKEN cDNA 2010106G01 gene                                                                                            | 3.14 | 1.71 | 0.02 |
| A_51_P222558 | NM_030074 | Zfp687     | 78266  | zinc finger protein 687<br>mediator of RNA polymerase II transcription, subunit 4                                     | 2.83 | 1.71 | 0.05 |
| A_51_P373369 | NM_026119 | Med4       | 67381  | homolog (yeast)                                                                                                       | 3.28 | 1.71 | 0.01 |
| A_52_P403582 | NM_024468 | Trim39     | 79263  | tripartite motif-containing 39<br>nuclear casein kinase and cyclin-dependent kinase                                   | 3.60 | 1.71 | 0.01 |
| A_51_P502674 | AK037833  | Nucks1     | 98415  | substrate 1                                                                                                           | 2.99 | 1.71 | 0.03 |
| A_52_P626756 | NM_027296 | Trnt1      | 70047  | tRNA nucleotidyl transferase, CCA-adding, 1                                                                           | 3.60 | 1.71 | 0.01 |
| A_52_P244162 | BC031445  | Golph3     | 66629  | golgi phosphoprotein 3                                                                                                | 2.91 | 1.71 | 0.04 |
| A_51_P204390 | NM_011343 | Sec61g     | 20335  | SEC61, gamma subunit                                                                                                  | 2.92 | 1.71 | 0.04 |
| A_52_P174396 | NM_009952 | Creb1      | 12912  | cAMP responsive element binding protein 1                                                                             | 4.97 | 1.71 | 0.00 |
| A_52_P538950 | AK046316  | B230369F2  | 320110 | RIKEN cDNA B230369F24 gene                                                                                            | 3.35 | 1.71 | 0.01 |
| A_51_P261379 | NM_139140 | Spats2     | 72572  | spermatogenesis associated, serine-rich 2                                                                             | 3.65 | 1.71 | 0.01 |
| A_52_P279226 | NM_026557 | Rchy1      | 68098  | ring finger and CHY zinc finger domain containing 1                                                                   | 2.99 | 1.71 | 0.03 |



|               |           |           |        |                                                        |      |      |      |
|---------------|-----------|-----------|--------|--------------------------------------------------------|------|------|------|
| A_52_P58471   | NM_199199 | Tmem199   | 195040 | transmembrane protein 199                              | 3.82 | 1.71 | 0.00 |
| A_52_P1005512 | AK161743  | Itsn2     | 20403  | intersectin 2                                          | 2.94 | 1.71 | 0.04 |
| A_52_P57526   | BC021160  | Sin3b     | 20467  | transcriptional regulator, SIN3B (yeast)               | 3.83 | 1.70 | 0.00 |
| A_51_P452189  | NM_025281 | Lyar      | 17089  | Ly1 antibody reactive clone                            | 4.19 | 1.70 | 0.00 |
| A_52_P134228  | NM_028185 | Lsm11     | 72290  | U7 snRNP-specific Sm-like protein LSM11                | 4.05 | 1.70 | 0.00 |
| A_52_P338110  | NM_024190 | Chmp1b    | 67064  | chromatin modifying protein 1B                         | 2.96 | 1.70 | 0.03 |
| A_52_P402577  | NM_024181 | Dnajc10   | 66861  | DnaJ (Hsp40) homolog, subfamily C, member 10           | 2.97 | 1.70 | 0.03 |
| A_51_P174016  | NM_008202 | Slc39a7   | 14977  | solute carrier family 39 (zinc transporter), member 7  | 3.45 | 1.70 | 0.01 |
| A_51_P467410  | NM_008722 | Npm1      | 18148  | nucleophosmin 1                                        | 3.42 | 1.70 | 0.01 |
| A_52_P95601   | NM_172151 | Zdhhc8    | 27801  | zinc finger, DHHC domain containing 8                  | 3.55 | 1.70 | 0.01 |
| A_51_P173022  | NM_026330 | Nsmce1    | 67711  | non-SMC element 1 homolog ( <i>S. cerevisiae</i> )     | 3.69 | 1.70 | 0.01 |
| A_51_P203850  | AK019727  | 4930539H1 | 178188 | RIKEN cDNA 4930539H15 gene                             | 2.82 | 1.70 | 0.05 |
| A_51_P137150  | NM_144831 | Dhx8      | 217207 | DEAH (Asp-Glu-Ala-His) box polypeptide 8               | 2.79 | 1.70 | 0.05 |
| A_51_P258435  | NM_026917 | Zdhhc3    | 69035  | zinc finger, DHHC domain containing 3                  | 3.66 | 1.70 | 0.01 |
| A_51_P258690  | NM_009136 | Scrg1     | 20284  | scrapie responsive gene 1                              | 3.91 | 1.70 | 0.00 |
| A_51_P352140  | NM_001013 | Dync1li2  | 234663 | dynein, cytoplasmic 1 light intermediate chain 2       | 4.18 | 1.70 | 0.00 |
| A_51_P460302  | NM_130863 | Adrbk1    | 110355 | adrenergic receptor kinase, beta 1                     | 3.24 | 1.70 | 0.01 |
| A_51_P424905  | AK086185  | Zfp384    | 269800 | zinc finger protein 384                                | 4.15 | 1.70 | 0.00 |
| A_52_P601914  | NM_146075 | Lemd2     | 224640 | LEM domain containing 2                                | 5.29 | 1.70 | 0.00 |
| A_52_P305289  | NM_011190 | Psme2     | 19188  | proteasome (prosome, macropain) 28 subunit, beta       | 4.05 | 1.70 | 0.00 |
| A_51_P274789  | NM_030690 | Rai14     | 75646  | retinoic acid induced 14                               | 3.35 | 1.70 | 0.01 |
| A_51_P188023  | XM_974308 | NA        | NA     | NA                                                     | 3.49 | 1.70 | 0.01 |
| A_51_P223665  | NM_007951 | Erh       | 13877  | enhancer of rudimentary homolog ( <i>Drosophila</i> )  | 3.67 | 1.70 | 0.01 |
| A_51_P234728  | NM_175116 | Lpar6     | 67168  | lysophosphatidic acid receptor 6                       | 3.96 | 1.70 | 0.00 |
| A_51_P253527  | NM_026097 | Rffl      | 67338  | ring finger and FYVE like domain containing protein    | 3.32 | 1.70 | 0.01 |
| A_51_P179604  | NM_010282 | Ggps1     | 14593  | geranylgeranyl diphosphate synthase 1                  | 2.88 | 1.70 | 0.04 |
| A_52_P9795    | BC068113  | Cirh1a    | 21771  | cirrhosis, autosomal recessive 1A (human)              | 2.84 | 1.70 | 0.05 |
| A_51_P185509  | NM_007896 | Mapre1    | 13589  | microtubule-associated protein, RP/EB family, member 1 | 3.48 | 1.70 | 0.01 |
| A_52_P360085  | NM_021529 | Ppp2r3c   | 59032  | protein phosphatase 2, regulatory subunit B'', gamma   | 3.31 | 1.69 | 0.01 |

|              |           |           |        |                                                                                                    |      |      |      |
|--------------|-----------|-----------|--------|----------------------------------------------------------------------------------------------------|------|------|------|
| A_51_P437787 | NM_026650 | Rbm28     | 68272  | RNA binding motif protein 28                                                                       | 4.82 | 1.69 | 0.00 |
| A_51_P156274 | NM_010736 | Ltbr      | 17000  | lymphotoxin B receptor                                                                             | 3.20 | 1.69 | 0.02 |
| A_51_P355820 | BC027683  | Zfp688    | 69234  | zinc finger protein 688                                                                            | 3.14 | 1.69 | 0.02 |
| A_52_P242329 | NM_011914 | Whsc2     | 24116  | Wolf-Hirschhorn syndrome candidate 2 (human)                                                       | 3.22 | 1.69 | 0.02 |
| A_52_P302598 | NM_009677 | Ap1g1     | 11765  | adaptor protein complex AP-1, gamma 1 subunit<br>proteasome (prosome, macropain) 26S subunit, non- | 2.73 | 1.69 | 0.07 |
| A_52_P574190 | NM_025894 | Psmc12    | 66997  | ATPase, 12                                                                                         | 4.87 | 1.69 | 0.00 |
| A_52_P480872 | NM_145475 | Cerk      | 223753 | ceramide kinase                                                                                    | 4.04 | 1.69 | 0.00 |
| A_51_P121506 | BC050948  | Ate1      | 11907  | arginyltransferase 1                                                                               | 4.09 | 1.69 | 0.00 |
| A_52_P151284 | NM_025907 | Mettl6    | 67011  | methyltransferase like 6                                                                           | 4.40 | 1.69 | 0.00 |
| A_51_P149455 | NM_007381 | Acadl     | 11363  | acyl-Coenzyme A dehydrogenase, long-chain                                                          | 2.95 | 1.69 | 0.03 |
| A_51_P163378 | NA        | NA        | NA     | NA                                                                                                 | 4.01 | 1.69 | 0.00 |
| A_51_P300395 | NM_027037 | 1700007K0 | 69318  | RIKEN cDNA 1700007K09 gene                                                                         | 3.23 | 1.69 | 0.02 |
| A_51_P216758 | NM_021529 | Ppp2r3c   | 59032  | protein phosphatase 2, regulatory subunit B'', gamma                                               | 4.76 | 1.69 | 0.00 |
| A_51_P147964 | NM_026959 | Stx18     | 71116  | syntaxin 18                                                                                        | 4.20 | 1.69 | 0.00 |
| A_52_P327615 | NM_181070 | Rab18     | 19330  | RAB18, member RAS oncogene family                                                                  | 3.70 | 1.69 | 0.01 |
| A_51_P300216 | NM_022309 | Cbfb      | 12400  | core binding factor beta<br>SMG1 homolog, phosphatidylinositol 3-kinase-related                    | 4.91 | 1.69 | 0.00 |
| A_51_P457171 | NM_001031 | Smg1      | 233789 | kinase (C. elegans)                                                                                | 3.46 | 1.69 | 0.01 |
| A_52_P454361 | AK077437  | Hars      | 15115  | histidyl-tRNA synthetase                                                                           | 3.64 | 1.69 | 0.01 |
| A_52_P440445 | AK087773  | Polr1a    | 20019  | polymerase (RNA) I polypeptide A                                                                   | 3.88 | 1.69 | 0.00 |
| A_52_P572456 | NM_177663 | Isg20l2   | 229504 | interferon stimulated exonuclease gene 20-like 2                                                   | 3.31 | 1.69 | 0.01 |
| A_52_P309884 | NA        | NA        | NA     | NA                                                                                                 | 2.71 | 1.69 | 0.07 |
| A_51_P230382 | NM_008815 | Etv4      | 18612  | ets variant gene 4 (E1A enhancer binding protein, E1AF)                                            | 2.99 | 1.69 | 0.03 |
| A_51_P436839 | NM_017405 | Lsr       | 54135  | lipolysis stimulated lipoprotein receptor                                                          | 3.09 | 1.69 | 0.02 |
| A_51_P414779 | NM_007928 | Mark2     | 13728  | MAP/microtubule affinity-regulating kinase 2                                                       | 3.53 | 1.69 | 0.01 |
| A_51_P463497 | NM_145135 | Rnh1      | 107702 | ribonuclease/angiogenin inhibitor 1                                                                | 2.81 | 1.68 | 0.05 |
| A_51_P296975 | AK035659  | 2510003E0 | 72320  | RIKEN cDNA 2510003E04 gene                                                                         | 3.16 | 1.68 | 0.02 |
| A_51_P438363 | NM_172703 | Eif4g3    | 230861 | eukaryotic translation initiation factor 4 gamma, 3                                                | 4.14 | 1.68 | 0.00 |
| A_51_P190262 | NM_009275 | Srprb     | 20818  | signal recognition particle receptor, B subunit                                                    | 2.77 | 1.68 | 0.06 |
| A_51_P420918 | NM_020498 | Ly6i      | 57248  | lymphocyte antigen 6 complex, locus I                                                              | 2.96 | 1.68 | 0.03 |

|              |           |           |        |                                                                                |      |      |      |
|--------------|-----------|-----------|--------|--------------------------------------------------------------------------------|------|------|------|
| A_52_P556390 | BC096528  | Ralgapa2  | 241694 | Ral GTPase activating protein, alpha subunit 2 (catalytic)                     | 3.81 | 1.68 | 0.00 |
| A_52_P408338 | AK043160  | S100pbp   | 74648  | S100P binding protein                                                          | 2.82 | 1.68 | 0.05 |
| A_51_P245485 | NM_181848 | Optn      | 71648  | optineurin                                                                     | 3.37 | 1.68 | 0.01 |
| A_51_P292030 | NM_030250 | Nus1      | 52014  | nuclear undecaprenyl pyrophosphate synthase 1 homolog ( <i>S. cerevisiae</i> ) | 3.83 | 1.68 | 0.00 |
| A_51_P197354 | NM_023647 | Nipa2     | 93790  | non imprinted in Prader-Willi/Angelman syndrome 2 homolog (human)              | 3.29 | 1.68 | 0.01 |
| A_51_P234174 | NM_008886 | Pms2      | 18861  | postmeiotic segregation increased 2 ( <i>S. cerevisiae</i> )                   | 4.97 | 1.68 | 0.00 |
| A_52_P24447  | NM_024253 | Nkg7      | 72310  | natural killer cell group 7 sequence                                           | 3.88 | 1.68 | 0.00 |
| A_51_P487219 | BC079536  | Cep110    | 26920  | centrosomal protein 110                                                        | 4.00 | 1.68 | 0.00 |
| A_52_P606754 | AK034700  | NA        | NA     | NA                                                                             | 3.85 | 1.68 | 0.00 |
| A_51_P302550 | NA        | NA        | NA     | NA                                                                             | 2.92 | 1.67 | 0.04 |
| A_51_P284442 | NM_026739 | 9530077C0 | 68283  | RIKEN cDNA 9530077C05 gene                                                     | 2.88 | 1.67 | 0.04 |
| A_52_P284162 | NM_009456 | Ube2l3    | 22195  | ubiquitin-conjugating enzyme E2L 3                                             | 4.12 | 1.67 | 0.00 |
| A_52_P153541 | AK172642  | Bfar      | 67118  | bifunctional apoptosis regulator                                               | 2.78 | 1.67 | 0.05 |
| A_51_P290170 | NM_019979 | Selk      | 80795  | selenoprotein K                                                                | 4.24 | 1.67 | 0.00 |
| A_51_P432907 | AK012372  | Gm10762   | 1E+08  | predicted gene 10762                                                           | 4.00 | 1.67 | 0.00 |
| A_51_P226932 | NM_133755 | Tubgcp2   | 74237  | tubulin, gamma complex associated protein 2                                    | 3.57 | 1.67 | 0.01 |
| A_51_P326030 | NM_145490 | BC011426  | 224893 | cDNA sequence BC011426                                                         | 2.92 | 1.67 | 0.04 |
| A_52_P95060  | AK172517  | Strn      | 268980 | striatin, calmodulin binding protein                                           | 3.52 | 1.67 | 0.01 |
| A_52_P636894 | AK081953  | 2010106G0 | 66552  | RIKEN cDNA 2010106G01 gene                                                     | 3.01 | 1.67 | 0.03 |
| A_51_P454797 | NM_025534 | Ccdc82    | 66396  | coiled-coil domain containing 82                                               | 3.54 | 1.67 | 0.01 |
| A_52_P231714 | NM_013497 | Creb3     | 12913  | cAMP responsive element binding protein 3                                      | 3.03 | 1.67 | 0.03 |
| A_52_P138906 | AK048733  | C230029D2 | 320255 | RIKEN cDNA C230029D21 gene                                                     | 3.20 | 1.67 | 0.02 |
| A_51_P129767 | NM_019824 | Arpc3     | 56378  | actin related protein 2/3 complex, subunit 3                                   | 4.35 | 1.67 | 0.00 |
| A_52_P462296 | NM_007755 | Cpeb1     | 12877  | cytoplasmic polyadenylation element binding protein 1                          | 2.83 | 1.67 | 0.05 |
| A_51_P437786 | NM_026650 | Rbm28     | 68272  | RNA binding motif protein 28                                                   | 4.18 | 1.67 | 0.00 |
| A_51_P137688 | AK087687  | Pex1      | 71382  | peroxisomal biogenesis factor 1                                                | 2.75 | 1.67 | 0.06 |
| A_51_P519950 | AK033374  | Rsbn1l    | 242860 | round spermatid basic protein 1-like                                           | 2.79 | 1.67 | 0.05 |
| A_52_P112721 | NM_178599 | Comm8     | 27784  | COMM domain containing 8                                                       | 2.75 | 1.67 | 0.06 |
| A_51_P257151 | AK046591  | Adipor2   | 68465  | adiponectin receptor 2                                                         | 2.88 | 1.67 | 0.04 |

|              |           |           |        |                                                                                                                |      |      |      |
|--------------|-----------|-----------|--------|----------------------------------------------------------------------------------------------------------------|------|------|------|
| A_52_P477649 | AK158055  | 1810058I2 | 67705  | RIKEN cDNA 1810058I24 gene                                                                                     | 3.12 | 1.67 | 0.02 |
| A_51_P389386 | NM_026746 | Nsmce2    | 68501  | non-SMC element 2 homolog (MMS21, <i>S. cerevisiae</i> )                                                       | 2.76 | 1.67 | 0.06 |
| A_52_P10622  | NM_010330 | Emb       | 13723  | embigin                                                                                                        | 4.31 | 1.67 | 0.00 |
| A_52_P119290 | NM_001029 | Ate1      | 11907  | arginyltransferase 1                                                                                           | 3.13 | 1.67 | 0.02 |
| A_51_P486132 | NM_146154 | Ppp1r8    | 100336 | protein phosphatase 1, regulatory (inhibitor) subunit 8<br>protein (peptidyl-prolyl cis/trans isomerase) NIMA- | 3.21 | 1.67 | 0.02 |
| A_51_P199866 | NM_023371 | Pin1      | 23988  | interacting 1                                                                                                  | 4.01 | 1.67 | 0.00 |
| A_52_P481320 | NA        | NA        | NA     | NA                                                                                                             | 3.46 | 1.67 | 0.01 |
| A_52_P499967 | NM_194257 | Fam118b   | 109229 | family with sequence similarity 118, member B                                                                  | 3.44 | 1.67 | 0.01 |
| A_51_P521125 | NM_025740 | Ccdc104   | 216618 | coiled-coil domain containing 104                                                                              | 2.77 | 1.66 | 0.05 |
| A_51_P306892 | NM_145384 | Pqlc2     | 212555 | PQ loop repeat containing 2                                                                                    | 2.86 | 1.66 | 0.05 |
| A_51_P356144 | NM_009224 | Snrnp70   | 20637  | small nuclear ribonucleoprotein 70 (U1)                                                                        | 3.84 | 1.66 | 0.00 |
| A_51_P154679 | NM_173186 | Tbc1d24   | 224617 | TBC1 domain family, member 24                                                                                  | 3.80 | 1.66 | 0.00 |
| A_51_P291227 | NM_001005 | Arhgap30  | 226652 | Rho GTPase activating protein 30                                                                               | 4.22 | 1.66 | 0.00 |
| A_51_P356775 | AK010104  | 2310068C1 | 70205  | RIKEN cDNA 2310068C19 gene                                                                                     | 2.93 | 1.66 | 0.04 |
| A_51_P369636 | NM_026115 | Hat1      | 107435 | histone aminotransferase 1                                                                                     | 4.52 | 1.66 | 0.00 |
| A_51_P466701 | XM_975192 | Camsap1   | 227634 | calmodulin regulated spectrin-associated protein 1                                                             | 3.11 | 1.66 | 0.02 |
| A_52_P277139 | NM_030886 | Ankrd17   | 81702  | ankyrin repeat domain 17<br>calcium channel, voltage-dependent, L type, alpha 1S                               | 3.53 | 1.66 | 0.01 |
| A_51_P103541 | L06234    | Cacna1s   | 12292  | subunit                                                                                                        | 3.28 | 1.66 | 0.01 |
| A_51_P314168 | NM_021888 | Qtrt1     | 60507  | queuine tRNA-ribosyltransferase 1                                                                              | 3.06 | 1.66 | 0.02 |
| A_52_P755824 | AK078024  | NA        | NA     | NA                                                                                                             | 2.85 | 1.66 | 0.05 |
| A_51_P202408 | NM_008967 | Ptgir     | 19222  | prostaglandin I receptor (IP)                                                                                  | 3.72 | 1.66 | 0.01 |
| A_52_P278238 | AK016937  | Cep170    | 545389 | centrosomal protein 170                                                                                        | 4.51 | 1.66 | 0.00 |
| A_52_P673421 | NM_178606 | Reep3     | 28193  | receptor accessory protein 3                                                                                   | 2.93 | 1.66 | 0.04 |
| A_51_P143152 | NM_024452 | Luzp1     | 269593 | leucine zipper protein 1                                                                                       | 3.32 | 1.66 | 0.01 |
| A_52_P220040 | NM_001039 | 4933421E1 | 321000 | RIKEN cDNA 4933421E11 gene<br>1-acylglycerol-3-phosphate O-acyltransferase 4                                   | 2.89 | 1.66 | 0.04 |
| A_51_P346165 | NM_026644 | Agpat4    | 68262  | (lysophosphatidic acid acyltransferase, delta)                                                                 | 2.80 | 1.66 | 0.05 |
| A_52_P661606 | NM_016966 | Phgdh     | 236539 | 3-phosphoglycerate dehydrogenase                                                                               | 5.26 | 1.66 | 0.00 |
| A_52_P344910 | NM_009391 | Ran       | 19384  | RAN, member RAS oncogene family                                                                                | 4.13 | 1.66 | 0.00 |

|              |           |           |        |                                                                                               |      |      |      |
|--------------|-----------|-----------|--------|-----------------------------------------------------------------------------------------------|------|------|------|
| A_52_P384916 | AK136384  | Nfkbiz    | 80859  | nuclear factor of kappa light polypeptide gene enhancer<br>in B-cells inhibitor, zeta         | 2.72 | 1.66 | 0.07 |
| A_52_P178738 | NM_023248 | Sbds      | 66711  | Shwachman-Bodian-Diamond syndrome homolog<br>(human)                                          | 2.72 | 1.66 | 0.07 |
| A_51_P205953 | NM_010448 | Hnrnpab   | 15384  | heterogeneous nuclear ribonucleoprotein A/B                                                   | 2.82 | 1.66 | 0.05 |
| A_51_P517096 | NM_011997 | Casp8ap2  | 26885  | caspase 8 associated protein 2                                                                | 3.34 | 1.66 | 0.01 |
| A_51_P202003 | NM_133693 | Rbm42     | 68035  | RNA binding motif protein 42                                                                  | 2.96 | 1.66 | 0.03 |
| A_51_P131942 | NM_027193 | Dph5      | 69740  | DPH5 homolog ( <i>S. cerevisiae</i> )                                                         | 3.61 | 1.66 | 0.01 |
| A_51_P417077 | NM_011700 | Vill      | 22351  | villin-like                                                                                   | 3.16 | 1.66 | 0.02 |
| A_52_P286605 | BC052212  | Phf20l1   | 239510 | PHD finger protein 20-like 1                                                                  | 3.52 | 1.66 | 0.01 |
| A_51_P363914 | NM_007636 | Cct2      | 12461  | chaperonin containing Tcp1, subunit 2 (beta)                                                  | 4.10 | 1.65 | 0.00 |
| A_52_P154517 | NM_134011 | Tbrg4     | 21379  | transforming growth factor beta regulated gene 4                                              | 3.49 | 1.65 | 0.01 |
| A_51_P516362 | NM_027889 | Vps11     | 71732  | vacuolar protein sorting 11 (yeast)                                                           | 4.02 | 1.65 | 0.00 |
| A_51_P469008 | NM_010119 | Ehd1      | 13660  | EH-domain containing 1                                                                        | 4.01 | 1.65 | 0.00 |
| A_51_P399960 | NM_027422 | Mier2     | 70427  | mesoderm induction early response 1, family member 2                                          | 3.37 | 1.65 | 0.01 |
| A_51_P321580 | NM_011873 | Dazap2    | 23994  | DAZ associated protein 2                                                                      | 3.01 | 1.65 | 0.03 |
| A_51_P461219 | NM_178693 | Coq4      | 227683 | coenzyme Q4 homolog (yeast)                                                                   | 4.00 | 1.65 | 0.00 |
| A_52_P381147 | NM_175127 | Fbxo28    | 67948  | F-box protein 28                                                                              | 3.48 | 1.65 | 0.01 |
| A_51_P157524 | NM_148952 | E2f4      | 104394 | E2F transcription factor 4                                                                    | 2.73 | 1.65 | 0.07 |
| A_51_P490348 | NM_025423 | 1110059E2 | 66206  | RIKEN cDNA 1110059E24 gene<br>v-ral simian leukemia viral oncogene homolog B (ras<br>related) | 3.01 | 1.65 | 0.03 |
| A_52_P253004 | NM_022327 | Ralb      | 64143  |                                                                                               | 3.03 | 1.65 | 0.03 |
| A_51_P179953 | NM_027922 | Ankle2    | 71782  | ankyrin repeat and LEM domain containing 2                                                    | 2.93 | 1.65 | 0.04 |
| A_51_P400752 | NM_010393 | H2-Q5     | 15016  | histocompatibility 2, Q region locus 5                                                        | 2.83 | 1.65 | 0.05 |
| A_51_P115085 | NM_175749 | Nup153    | 218210 | nucleoporin 153                                                                               | 3.04 | 1.65 | 0.03 |
| A_52_P441168 | NA        | NA        | NA     | NA                                                                                            | 3.17 | 1.65 | 0.02 |
| A_51_P198434 | AK150790  | H2-K1     | 14972  | histocompatibility 2, K1, K region                                                            | 3.55 | 1.65 | 0.01 |
| A_52_P731758 | AK078294  | NA        | NA     | NA                                                                                            | 3.90 | 1.65 | 0.00 |
| A_51_P197378 | NM_026217 | Atg12     | 67526  | autophagy-related 12 (yeast)                                                                  | 3.40 | 1.65 | 0.01 |
| A_51_P239113 | NM_011755 | Zfp35     | 22694  | zinc finger protein 35                                                                        | 3.45 | 1.65 | 0.01 |
| A_51_P457706 | NM_175667 | Ankrd5    | 319196 | ankyrin repeat domain 5                                                                       | 3.90 | 1.65 | 0.00 |
| A_52_P572702 | NM_001033 | Gxylt1    | 223827 | glucoside xylosyltransferase 1                                                                | 3.01 | 1.65 | 0.03 |
| A_52_P671812 | XM_918536 | LOC641192 | 641192 | similar to heat shock protein 8                                                               | 2.99 | 1.65 | 0.03 |

|              |           |           |        |                                                                 |      |      |      |
|--------------|-----------|-----------|--------|-----------------------------------------------------------------|------|------|------|
| A_51_P306047 | NM_024206 | Sec13     | 110379 | SEC13 homolog ( <i>S. cerevisiae</i> )                          | 2.93 | 1.65 | 0.04 |
| A_51_P195573 | NM_010066 | Dnmt1     | 13433  | DNA methyltransferase (cytosine-5) 1                            | 3.09 | 1.65 | 0.02 |
| A_52_P57359  | NM_013835 | Trove2    | 20822  | TROVE domain family, member 2                                   | 2.89 | 1.65 | 0.04 |
| A_51_P473229 | NM_009565 | Zbtb7b    | 22724  | zinc finger and BTB domain containing 7B                        | 3.17 | 1.65 | 0.02 |
| A_51_P268103 | NM_172253 | Twistnb   | 28071  | TWIST neighbor                                                  | 3.30 | 1.65 | 0.01 |
| A_51_P103261 | NM_009198 | Slc17a1   | 20504  | solute carrier family 17 (sodium phosphate), member 1           | 2.87 | 1.64 | 0.04 |
| A_52_P372032 | NM_019553 | Ddx21     | 56200  | DEAD (Asp-Glu-Ala-Asp) box polypeptide 21                       | 2.91 | 1.64 | 0.04 |
| A_52_P587003 | NM_011755 | Zfp35     | 22694  | zinc finger protein 35                                          | 3.53 | 1.64 | 0.01 |
| A_51_P204860 | NM_026221 | Ppfibp1   | 67533  | PTPRF interacting protein, binding protein 1 (liprin beta 1)    | 3.74 | 1.64 | 0.01 |
| A_52_P723727 | AK086918  | NA        | NA     | NA                                                              | 2.80 | 1.64 | 0.05 |
| A_51_P326499 | NM_007691 | Chek1     | 12649  | checkpoint kinase 1 homolog ( <i>S. pombe</i> )                 | 2.80 | 1.64 | 0.05 |
| A_52_P525519 | AK142182  | Pkn3      | 263803 | protein kinase N3                                               | 2.99 | 1.64 | 0.03 |
| A_51_P142861 | NM_009807 | Casp1     | 12362  | caspase 1                                                       | 2.87 | 1.64 | 0.04 |
| A_52_P225370 | AK011855  | 2610201A1 | 70434  | RIKEN cDNA 2610201A13 gene                                      | 4.05 | 1.64 | 0.00 |
| A_52_P82510  | NM_008707 | Nmt1      | 18107  | N-myristoyltransferase 1                                        | 3.40 | 1.64 | 0.01 |
| A_52_P165315 | NA        | NA        | NA     | NA                                                              | 3.18 | 1.64 | 0.02 |
| A_52_P46020  | XM_895070 | NA        | NA     | NA                                                              | 2.79 | 1.64 | 0.05 |
| A_52_P409961 | NM_028399 | Ccnt2     | 72949  | cyclin T2                                                       | 2.94 | 1.64 | 0.03 |
| A_51_P436719 | NM_011431 | Eftud2    | 20624  | elongation factor Tu GTP binding domain containing 2            | 3.93 | 1.64 | 0.00 |
| A_52_P198090 | NM_029068 | Snx16     | 74718  | sorting nexin 16                                                | 2.80 | 1.64 | 0.05 |
| A_52_P683991 | NM_008261 | Hnf4a     | 15378  | hepatic nuclear factor 4, alpha                                 | 3.61 | 1.64 | 0.01 |
| A_52_P34012  | XM_358889 | NA        | NA     | NA                                                              | 2.77 | 1.64 | 0.05 |
| A_51_P478920 | NM_175353 | Exoc6     | 107371 | exocyst complex component 6                                     | 3.08 | 1.64 | 0.02 |
| A_51_P137383 | NM_152807 | Ccdc137   | 67291  | coiled-coil domain containing 137                               | 3.05 | 1.64 | 0.02 |
| A_52_P600038 | NM_146128 | Dlgap4    | 228836 | discs, large homolog-associated protein 4 ( <i>Drosophila</i> ) | 3.87 | 1.64 | 0.00 |
| A_52_P256244 | CJ326049  | Cyp4f17   | 208285 | cytochrome P450, family 4, subfamily f, polypeptide 17          | 3.75 | 1.64 | 0.00 |
| A_51_P436928 | NM_029767 | Rps9      | 76846  | ribosomal protein S9                                            | 3.11 | 1.64 | 0.02 |
| A_52_P419455 | NM_007413 | Adora2b   | 11541  | adenosine A2b receptor                                          | 3.09 | 1.64 | 0.02 |
| A_51_P463428 | NM_178149 | Pik3ip1   | 216505 | phosphoinositide-3-kinase interacting protein 1                 | 3.25 | 1.64 | 0.01 |

|               |           |            |        |                                                                                                        |      |      |      |
|---------------|-----------|------------|--------|--------------------------------------------------------------------------------------------------------|------|------|------|
| A_51_P149325  | NM_026545 | Psmd8      | 57296  | proteasome (prosome, macropain) 26S subunit, non-ATPase, 8                                             | 3.83 | 1.64 | 0.00 |
| A_52_P33014   | NM_146154 | Ppp1r8     | 100336 | protein phosphatase 1, regulatory (inhibitor) subunit 8                                                | 3.83 | 1.64 | 0.00 |
| A_51_P344364  | NM_030175 | Hhipl2     | 78772  | hedgehog interacting protein-like 2                                                                    | 3.95 | 1.64 | 0.00 |
| A_51_P430357  | NM_022993 | Lrp10      | 65107  | low-density lipoprotein receptor-related protein 10                                                    | 2.88 | 1.64 | 0.04 |
| A_51_P155522  | NM_008945 | Psmb4      | 19172  | proteasome (prosome, macropain) subunit, beta type 4                                                   | 4.00 | 1.64 | 0.00 |
| A_51_P215293  | AK173305  | Pwwp2a     | 70802  | PWWP domain containing 2A                                                                              | 3.33 | 1.63 | 0.01 |
| A_51_P297480  | NM_144491 | Dph1       | 116905 | DPH1 homolog ( <i>S. cerevisiae</i> )                                                                  | 3.00 | 1.63 | 0.03 |
| A_52_P120925  | NM_175224 | Metap1     | 75624  | methionyl aminopeptidase 1                                                                             | 2.76 | 1.63 | 0.06 |
| A_51_P493486  | AK048179  | Mllt4      | 17356  | myeloid/lymphoid or mixed-lineage leukemia (trithorax homolog, <i>Drosophila</i> ); translocated to, 4 | 2.97 | 1.63 | 0.03 |
| A_52_P463962  | NM_183296 | Krtap16-10 | 71369  | keratin associated protein 16-10                                                                       | 4.58 | 1.63 | 0.00 |
| A_51_P146593  | NM_146773 | Olfir508   | 258769 | olfactory receptor 508                                                                                 | 2.72 | 1.63 | 0.07 |
| A_51_P324351  | NM_013900 | Mfi2       | 30060  | antigen p97 (melanoma associated) identified by monoclonal antibodies 133.2 and 96.5                   | 3.49 | 1.63 | 0.01 |
| A_52_P220347  | NM_011672 | Ufd1l      | 22230  | ubiquitin fusion degradation 1 like                                                                    | 2.76 | 1.63 | 0.06 |
| A_52_P335548  | NM_025824 | Bzw1       | 66882  | basic leucine zipper and W2 domains 1                                                                  | 2.76 | 1.63 | 0.06 |
| A_51_P426943  | NM_018855 | Gas8       | 104346 | growth arrest specific 8                                                                               | 2.73 | 1.63 | 0.07 |
| A_51_P109766  | NM_009503 | Vcp        | 269523 | valosin containing protein                                                                             | 2.74 | 1.63 | 0.07 |
| A_51_P208240  | NM_019418 | Tnfsf14    | 50930  | tumor necrosis factor (ligand) superfamily, member 14                                                  | 3.63 | 1.63 | 0.01 |
| A_52_P1125218 | BC093523  | Dda1       | 66498  | DET1 and DDB1 associated 1                                                                             | 3.53 | 1.63 | 0.01 |
| A_52_P649356  | NM_027889 | Vps11      | 71732  | vacuolar protein sorting 11 (yeast)                                                                    | 4.41 | 1.63 | 0.00 |
| A_51_P361535  | NM_011190 | Psme2      | 19188  | proteasome (prosome, macropain) 28 subunit, beta                                                       | 3.20 | 1.63 | 0.02 |
| A_52_P483799  | NM_001033 | NA         | NA     | NA                                                                                                     | 2.89 | 1.63 | 0.04 |
| A_51_P323221  | NM_175306 | Phactr4    | 100169 | phosphatase and actin regulator 4                                                                      | 3.16 | 1.63 | 0.02 |
| A_51_P405423  | AK010198  | Smcr8      | 237782 | Smith-Magenis syndrome chromosome region, candidate 8 homolog (human)                                  | 3.31 | 1.63 | 0.01 |
| A_52_P197436  | NA        | NA         | NA     | NA                                                                                                     | 3.24 | 1.63 | 0.01 |

|               |           |           |        |                                                                               |      |      |      |
|---------------|-----------|-----------|--------|-------------------------------------------------------------------------------|------|------|------|
| A_51_P369154  | NM_144926 | Sez6l2    | 233878 | seizure related 6 homolog like 2                                              | 3.39 | 1.63 | 0.01 |
| A_51_P433091  | AK009365  | Purb      | 19291  | purine rich element binding protein B                                         | 4.13 | 1.63 | 0.00 |
| A_51_P485542  | NM_018737 | Ctps2     | 55936  | cytidine 5'-triphosphate synthase 2                                           | 3.05 | 1.63 | 0.02 |
| A_51_P255875  | NM_011061 | Padi4     | 18602  | peptidyl arginine deiminase, type IV                                          | 2.94 | 1.63 | 0.04 |
| A_51_P339380  | BC045208  | Setmar    | 74729  | SET domain and mariner transposase fusion gene                                | 2.87 | 1.63 | 0.05 |
| A_52_P634522  | NA        | NA        | NA     | NA                                                                            | 2.85 | 1.63 | 0.05 |
| A_52_P240020  | NM_146165 | Aimp2     | 231872 | aminoacyl tRNA synthetase complex-interacting multifunctional protein 2       | 2.84 | 1.63 | 0.05 |
| A_51_P116419  | NM_013790 | Abcc5     | 27416  | ATP-binding cassette, sub-family C (CFTR/MRP), member 5                       | 3.55 | 1.63 | 0.01 |
| A_51_P266640  | NM_026277 | Nob1      | 67619  | NIN1/RPN12 binding protein 1 homolog ( <i>S. cerevisiae</i> )                 | 3.81 | 1.63 | 0.00 |
| A_52_P401295  | XR_001856 | NA        | NA     | NA                                                                            | 2.74 | 1.63 | 0.06 |
| A_51_P104456  | NM_022889 | Pes1      | 64934  | pescadillo homolog 1, containing BRCT domain (zebrafish)                      | 3.81 | 1.63 | 0.00 |
| A_52_P1189908 | BI793804  | Sox9      | 20682  | SRY-box containing gene 9                                                     | 2.71 | 1.63 | 0.07 |
| A_52_P2081    | U95114    | Nhp2l1    | 20826  | NHP2 non-histone chromosome protein 2-like 1 ( <i>S. cerevisiae</i> )         | 2.94 | 1.63 | 0.04 |
| A_51_P444795  | AK149231  | NA        | NA     | NA                                                                            | 4.70 | 1.63 | 0.00 |
| A_52_P488200  | NM_026269 | 1110007L1 | 67604  | RIKEN cDNA 1110007L15 gene                                                    | 5.05 | 1.62 | 0.00 |
| A_51_P466490  | NM_146205 | Armc5     | 233912 | armadillo repeat containing 5                                                 | 2.87 | 1.62 | 0.04 |
| A_52_P937     | NM_025668 | Spcs2     | 66624  | signal peptidase complex subunit 2 homolog ( <i>S. cerevisiae</i> )           | 2.76 | 1.62 | 0.06 |
| A_52_P516893  | NM_011755 | Zfp35     | 22694  | zinc finger protein 35                                                        | 3.16 | 1.62 | 0.02 |
| A_52_P676108  | NM_027187 | Rnaseh2a  | 69724  | ribonuclease H2, large subunit                                                | 3.74 | 1.62 | 0.01 |
| A_52_P422172  | NM_011932 | Dapp1     | 26377  | dual adaptor for phosphotyrosine and 3-phosphoinositides 1                    | 3.69 | 1.62 | 0.01 |
| A_52_P261184  | AK085780  | Il1rl2    | 107527 | interleukin 1 receptor-like 2                                                 | 3.61 | 1.62 | 0.01 |
| A_51_P155257  | NM_022305 | B4galt1   | 14595  | UDP-Gal:betaGlcNAc beta 1,4- galactosyltransferase, polypeptide 1             | 2.85 | 1.62 | 0.05 |
| A_52_P600318  | NM_022813 | Scamp2    | 24044  | secretory carrier membrane protein 2                                          | 3.31 | 1.62 | 0.01 |
| A_51_P120859  | NM_008640 | Laptm4a   | 17775  | lysosomal-associated protein transmembrane 4A                                 | 3.27 | 1.62 | 0.01 |
| A_52_P84302   | AK132230  | Esf1      | 66580  | ESF1, nucleolar pre-rRNA processing protein, homolog ( <i>S. cerevisiae</i> ) | 3.12 | 1.62 | 0.02 |



|              |           |           |        |                                                                        |      |      |      |
|--------------|-----------|-----------|--------|------------------------------------------------------------------------|------|------|------|
| A_52_P949155 | NA        | NA        | NA     | NA                                                                     | 2.72 | 1.62 | 0.07 |
| A_52_P83233  | NM_011728 | Xpa       | 22590  | xeroderma pigmentosum, complementation group A                         | 2.83 | 1.62 | 0.05 |
| A_52_P619192 | NM_198620 | Rundc3b   | 242819 | RUN domain containing 3B                                               | 3.37 | 1.62 | 0.01 |
| A_52_P130596 | NM_001025 | Atf2      | 11909  | activating transcription factor 2                                      | 2.80 | 1.62 | 0.05 |
| A_51_P334604 | NM_018765 | Wbp4      | 22380  | WW domain binding protein 4                                            | 2.95 | 1.62 | 0.03 |
| A_52_P75975  | AK081329  | C130006E2 | 331563 | hypothetical protein C130006E23                                        | 3.43 | 1.62 | 0.01 |
| A_52_P354744 | NM_011401 | Slc2a3    | 20527  | solute carrier family 2 (facilitated glucose transporter), member 3    | 3.00 | 1.62 | 0.03 |
| A_51_P338924 | NM_010509 | Ifnar2    | 15976  | interferon (alpha and beta) receptor 2                                 | 3.21 | 1.62 | 0.02 |
| A_52_P547000 | XM_892996 | NA        | NA     | NA                                                                     | 2.71 | 1.62 | 0.07 |
| A_52_P491544 | NM_017464 | Nedd9     | 18003  | neural precursor cell expressed, developmentally down-regulated gene 9 | 4.09 | 1.62 | 0.00 |
| A_51_P204075 | NM_175399 | Exosc4    | 109075 | exosome component 4                                                    | 3.11 | 1.62 | 0.02 |
| A_51_P399924 | NM_001005 | Txlna     | 109658 | taxilin alpha                                                          | 2.72 | 1.62 | 0.07 |
| A_52_P246082 | NM_021461 | Mknk1     | 17346  | MAP kinase-interacting serine/threonine kinase 1                       | 2.77 | 1.62 | 0.05 |
| A_51_P249227 | NM_008972 | Ptma      | 19231  | prothymosin alpha                                                      | 4.23 | 1.61 | 0.00 |
| A_51_P396273 | NM_010937 | Nras      | 18176  | neuroblastoma ras oncogene                                             | 2.77 | 1.61 | 0.05 |
| A_52_P314985 | NA        | NA        | NA     | NA                                                                     | 2.90 | 1.61 | 0.04 |
| A_52_P88934  | AK033428  | Ubfd1     | 28018  | ubiquitin family domain containing 1                                   | 3.01 | 1.61 | 0.03 |
| A_52_P637440 | NM_010447 | Hnrnpa1   | 15382  | heterogeneous nuclear ribonucleoprotein A1                             | 3.29 | 1.61 | 0.01 |
| A_52_P568731 | NM_025505 | Blzf1     | 66352  | basic leucine zipper nuclear factor 1                                  | 3.07 | 1.61 | 0.02 |
| A_51_P115197 | NM_010833 | Msn       | 17698  | moesin                                                                 | 2.80 | 1.61 | 0.05 |
| A_52_P508167 | NM_010093 | E2f3      | 13557  | E2F transcription factor 3                                             | 3.26 | 1.61 | 0.01 |
| A_52_P495031 | NM_029418 | 9130401M1 | 75758  | RIKEN cDNA 9130401M01 gene                                             | 4.33 | 1.61 | 0.00 |
| A_51_P250551 | NM_178380 | Dhx38     | 64340  | DEAH (Asp-Glu-Ala-His) box polypeptide 38                              | 2.89 | 1.61 | 0.04 |
| A_52_P656800 | NM_198861 | BC046404  | 192976 | cDNA sequence BC046404                                                 | 2.72 | 1.61 | 0.07 |
| A_51_P442359 | AK078302  | NA        | NA     | NA                                                                     | 2.98 | 1.61 | 0.03 |
| A_51_P235909 | NM_026888 | Phkg2     | 68961  | phosphorylase kinase, gamma 2 (testis)                                 | 3.77 | 1.61 | 0.00 |
| A_52_P34397  | BC063047  | Tcfe3     | 209446 | transcription factor E3                                                | 3.03 | 1.61 | 0.03 |
| A_52_P360552 | NM_029777 | Rhbdd1    | 76867  | rhomboid domain containing 1                                           | 3.49 | 1.61 | 0.01 |
| A_52_P447108 | NM_025888 | Kctd20    | 66989  | potassium channel tetramerisation domain containing 20                 | 2.80 | 1.61 | 0.05 |

|              |           |          |        |                                                                                                |      |      |      |
|--------------|-----------|----------|--------|------------------------------------------------------------------------------------------------|------|------|------|
| A_52_P664559 | NM_021559 | Zfp191   | 59057  | zinc finger protein 191                                                                        | 3.54 | 1.61 | 0.01 |
| A_52_P558087 | NM_026173 | 1200014M | 67463  | RIKEN cDNA 1200014M14 gene                                                                     | 2.78 | 1.61 | 0.05 |
| A_52_P170761 | NM_022979 | Nup98    | 269966 | nucleoporin 98                                                                                 | 2.70 | 1.61 | 0.07 |
| A_51_P340013 | NM_178626 | Cdc42se2 | 72729  | CDC42 small effector 2                                                                         | 3.26 | 1.61 | 0.01 |
| A_51_P286878 | AK016577  | Ttll11   | 74410  | tubulin tyrosine ligase-like family, member 11                                                 | 3.66 | 1.61 | 0.01 |
| A_51_P135423 | NM_001037 | Capzb    | 12345  | capping protein (actin filament) muscle Z-line, beta                                           | 4.38 | 1.61 | 0.00 |
| A_52_P313813 | NM_026631 | Nhp2     | 52530  | NHP2 ribonucleoprotein homolog (yeast)                                                         | 2.83 | 1.61 | 0.05 |
| A_51_P207031 | NM_010876 | Ncf1     | 17969  | neutrophil cytosolic factor 1                                                                  | 3.83 | 1.61 | 0.00 |
| A_52_P681495 | NM_027930 | Fam54a   | 71804  | family with sequence similarity 54, member A                                                   | 3.03 | 1.61 | 0.03 |
| A_52_P512806 | AK173210  | Usp37    | 319651 | ubiquitin specific peptidase 37                                                                | 3.61 | 1.61 | 0.01 |
| A_51_P250058 | NA        | NA       | NA     | NA                                                                                             | 2.78 | 1.61 | 0.05 |
| A_52_P310981 | NM_007917 | Eif4e    | 13684  | eukaryotic translation initiation factor 4E                                                    | 3.57 | 1.61 | 0.01 |
| A_52_P445622 | NM_025921 | 2610002M | 67028  | RIKEN cDNA 2610002M06 gene                                                                     | 3.04 | 1.61 | 0.03 |
| A_52_P471502 | NM_198606 | Dcaf13   | 223499 | DDB1 and CUL4 associated factor 13                                                             | 3.41 | 1.61 | 0.01 |
| A_52_P320686 | NA        | NA       | NA     | NA                                                                                             | 4.16 | 1.61 | 0.00 |
| A_51_P483839 | NM_016706 | Coil     | 12812  | coilin                                                                                         | 3.09 | 1.61 | 0.02 |
| A_52_P682873 | BC057661  | Rabggtb  | 19352  | RAB geranylgeranyl transferase, b subunit                                                      | 3.21 | 1.61 | 0.02 |
| A_51_P125050 | NM_134139 | Wdr74    | 107071 | WD repeat domain 74                                                                            | 2.96 | 1.61 | 0.03 |
| A_52_P103066 | NM_008679 | Ncoa3    | 17979  | nuclear receptor coactivator 3                                                                 | 3.10 | 1.60 | 0.02 |
| A_52_P622988 | AK042211  | Ednra    | 13617  | endothelin receptor type A                                                                     | 3.85 | 1.60 | 0.00 |
| A_51_P314487 | NM_030229 | Polr3h   | 78929  | polymerase (RNA) III (DNA directed) polypeptide H                                              | 3.14 | 1.60 | 0.02 |
| A_51_P481191 | NM_027382 | Hdac8    | 70315  | histone deacetylase 8                                                                          | 3.77 | 1.60 | 0.00 |
| A_52_P150851 | AK028812  | Adamts12 | 239337 | a disintegrin-like and metallopeptidase (reprolysin type) with thrombospondin type 1 motif, 12 | 3.09 | 1.60 | 0.02 |
| A_52_P536082 | NM_027297 | Prpf4    | 70052  | PRP4 pre-mRNA processing factor 4 homolog (yeast)                                              | 3.17 | 1.60 | 0.02 |
| A_51_P428086 | NM_009260 | Spnb2    | 20742  | spectrin beta 2                                                                                | 3.96 | 1.60 | 0.00 |
| A_51_P379710 | NM_133933 | Rpn1     | 103963 | ribophorin I                                                                                   | 2.82 | 1.60 | 0.05 |
| A_51_P233603 | NM_011969 | Psma7    | 26444  | proteasome (prosome, macropain) subunit, alpha type 7                                          | 4.24 | 1.60 | 0.00 |
| A_51_P100787 | AX775977  | Snw1     | 66354  | SNW domain containing 1                                                                        | 3.74 | 1.60 | 0.01 |

|              |           |           |        |                                                                                       |      |      |      |
|--------------|-----------|-----------|--------|---------------------------------------------------------------------------------------|------|------|------|
| A_51_P307467 | NM_028753 | Pop7      | 74097  | processing of precursor 7, ribonuclease P family, ( <i>S. cerevisiae</i> )            | 3.75 | 1.60 | 0.00 |
| A_52_P553673 | BC061503  | Ttc17     | 74569  | tetratricopeptide repeat domain 17                                                    | 3.18 | 1.60 | 0.02 |
| A_52_P521710 | NM_172254 | Dph3      | 105638 | DPH3 homolog (KTI11, <i>S. cerevisiae</i> )                                           | 2.93 | 1.60 | 0.04 |
| A_52_P363087 | NM_011692 | Vbp1      | 22327  | von Hippel-Lindau binding protein 1                                                   | 4.71 | 1.60 | 0.00 |
| A_52_P442722 | BC058699  | Nol8      | 70930  | nucleolar protein 8                                                                   | 2.82 | 1.60 | 0.05 |
| A_52_P160970 | NM_019921 | Akap10    | 56697  | A kinase (PRKA) anchor protein 10                                                     | 4.04 | 1.60 | 0.00 |
| A_51_P103229 | AK011349  | Rest      | 19712  | RE1-silencing transcription factor                                                    | 3.02 | 1.60 | 0.03 |
| A_52_P82660  | AK133212  | Mcm9      | 71567  | minichromosome maintenance complex component 9                                        | 3.27 | 1.60 | 0.01 |
| A_51_P476008 | NM_013854 | Abcf1     | 224742 | ATP-binding cassette, sub-family F (GCN20), member 1                                  | 3.27 | 1.60 | 0.01 |
| A_52_P496870 | NM_025521 | 2310011J0 | 66374  | RIKEN cDNA 2310011J03 gene                                                            | 3.16 | 1.60 | 0.02 |
| A_51_P249414 | NM_022408 | Dgcr14    | 27886  | DiGeorge syndrome critical region gene 14                                             | 4.07 | 1.60 | 0.00 |
| A_51_P187231 | NM_145453 | Zcchc9    | 69085  | zinc finger, CCHC domain containing 9                                                 | 2.98 | 1.60 | 0.03 |
| A_51_P504815 | NM_025288 | Stfa3     | 20863  | stefin A3                                                                             | 2.86 | 1.60 | 0.05 |
| A_52_P666824 | NM_146084 | Fam13b    | 225358 | family with sequence similarity 13, member B                                          | 3.17 | 1.60 | 0.02 |
| A_51_P395921 | NM_033607 | Uchl4     | 93841  | ubiquitin carboxyl-terminal esterase L4                                               | 3.81 | 1.59 | 0.00 |
| A_52_P318247 | NM_026404 | Slc35a4   | 67843  | solute carrier family 35, member A4                                                   | 4.21 | 1.59 | 0.00 |
| A_51_P273879 | NM_029775 | Dcun1d5   | 76863  | DCN1, defective in cullin neddylation 1, domain containing 5 ( <i>S. cerevisiae</i> ) | 3.09 | 1.59 | 0.02 |
| A_52_P682465 | AK089360  | Rps28     | 54127  | ribosomal protein S28                                                                 | 3.16 | 1.59 | 0.02 |
| A_52_P373782 | NM_172695 | Plaa      | 18786  | phospholipase A2, activating protein                                                  | 3.02 | 1.59 | 0.03 |
| A_52_P54274  | AK043055  | Masp1     | 17174  | mannan-binding lectin serine peptidase 1                                              | 3.80 | 1.59 | 0.00 |
| A_52_P67079  | NM_027185 | Def6      | 23853  | differentially expressed in FDCP 6                                                    | 3.02 | 1.59 | 0.03 |
| A_51_P315506 | NM_133247 | Usp33     | 170822 | ubiquitin specific peptidase 33                                                       | 3.20 | 1.59 | 0.02 |
| A_51_P162676 | NM_177778 | Armc7     | 276905 | armadillo repeat containing 7                                                         | 3.86 | 1.59 | 0.00 |
| A_52_P667287 | NM_172856 | Lass6     | 241447 | LAG1 homolog, ceramide synthase 6                                                     | 2.76 | 1.59 | 0.06 |
| A_52_P908943 | XM_979235 | EG665756  | 665756 | predicted gene, EG665756                                                              | 3.85 | 1.59 | 0.00 |
| A_52_P418644 | NM_019755 | Plp2      | 18824  | proteolipid protein 2                                                                 | 3.98 | 1.59 | 0.00 |
| A_51_P324273 | NM_177267 | Dcaf5     | 320808 | DDB1 and CUL4 associated factor 5                                                     | 3.60 | 1.59 | 0.01 |
| A_51_P241111 | NM_133884 | Gpn2      | 100210 | GPN-loop GTPase 2                                                                     | 2.82 | 1.59 | 0.05 |
| A_51_P253204 | NM_028805 | Katnb1    | 74187  | katanin p80 (WD40-containing) subunit B 1                                             | 3.47 | 1.59 | 0.01 |

|              |           |           |        |                                                             |      |      |      |
|--------------|-----------|-----------|--------|-------------------------------------------------------------|------|------|------|
|              |           |           |        | ATP synthase, H <sup>+</sup> transporting, mitochondrial F0 |      |      |      |
| A_52_P195798 | NM_026536 | Atp5s     | 68055  | complex, subunit s                                          | 3.20 | 1.59 | 0.02 |
| A_51_P311105 | NM_009134 | Scn10a    | 20264  | sodium channel, voltage-gated, type X, alpha                | 2.91 | 1.59 | 0.04 |
| A_52_P62085  | NM_022325 | Ctsz      | 64138  | cathepsin Z                                                 | 3.60 | 1.59 | 0.01 |
| A_51_P440107 | NM_026968 | Manbal    | 69161  | mannosidase, beta A, lysosomal-like                         | 3.09 | 1.59 | 0.02 |
| A_52_P48723  | NM_053180 | Cdk20     | 105278 | cyclin-dependent kinase 20                                  | 3.00 | 1.59 | 0.03 |
| A_52_P338039 | NM_178613 | 4933433P1 | 66787  | RIKEN cDNA 4933433P14 gene                                  | 2.71 | 1.59 | 0.07 |
| A_51_P380541 | NM_013911 | Fbxl12    | 30843  | F-box and leucine-rich repeat protein 12                    | 2.99 | 1.59 | 0.03 |
|              |           |           |        | protein phosphatase 1, regulatory (inhibitor) subunit       |      |      |      |
| A_52_P391066 | AK010836  | Ppp1r12c  | 232807 | 12C                                                         | 4.05 | 1.59 | 0.00 |
| A_51_P397847 | NM_025965 | Ssr1      | 107513 | signal sequence receptor, alpha                             | 3.45 | 1.59 | 0.01 |
| A_52_P280899 | NM_028866 | Wdr33     | 74320  | WD repeat domain 33                                         | 2.78 | 1.58 | 0.05 |
| A_51_P394676 | BC040217  | Mef2d     | 17261  | myocyte enhancer factor 2D                                  | 3.01 | 1.58 | 0.03 |
| A_52_P228079 | NM_007497 | Atf1      | 11908  | activating transcription factor 1                           | 2.75 | 1.58 | 0.06 |
| A_51_P472867 | NM_145226 | Oas3      | 246727 | 2'-5' oligoadenylate synthetase 3                           | 3.48 | 1.58 | 0.01 |
|              |           |           |        |                                                             |      |      |      |
| A_51_P372463 | NM_008053 | Fxr1      | 14359  | fragile X mental retardation gene 1, autosomal homolog      | 3.94 | 1.58 | 0.00 |
| A_52_P457700 | NA        | NA        | NA     | NA                                                          | 3.87 | 1.58 | 0.00 |
|              |           |           |        |                                                             |      |      |      |
| A_52_P265524 | NM_011026 | P2rx4     | 18438  | purinergic receptor P2X, ligand-gated ion channel 4         | 3.40 | 1.58 | 0.01 |
|              |           |           |        |                                                             |      |      |      |
| A_52_P207278 | NM_011962 | Plod3     | 26433  | procollagen-lysine, 2-oxoglutarate 5-dioxygenase 3          | 3.59 | 1.58 | 0.01 |
| A_52_P653565 | NA        | NA        | NA     | NA                                                          | 2.82 | 1.58 | 0.05 |
| A_51_P274649 | AK044348  | NA        | NA     | NA                                                          | 3.30 | 1.58 | 0.01 |
|              |           |           |        | tRNA 5-methylaminomethyl-2-thiouridylate                    |      |      |      |
| A_52_P386837 | NM_028063 | Trmu      | 72026  | methyltransferase                                           | 3.44 | 1.58 | 0.01 |
| A_51_P513515 | AK018656  | Fer1l4    | 74562  | fer-1-like 4 (C. elegans)                                   | 3.76 | 1.58 | 0.00 |
| A_52_P332788 | XM_001006 | NA        | NA     | NA                                                          | 2.86 | 1.58 | 0.05 |
| A_51_P267740 | NM_026934 | Zc3h15    | 69082  | zinc finger CCCH-type containing 15                         | 4.19 | 1.58 | 0.00 |
| A_51_P454207 | NM_008679 | Ncoa3     | 17979  | nuclear receptor coactivator 3                              | 3.52 | 1.58 | 0.01 |
| A_51_P173692 | NM_177250 | Lingo4    | 320747 | leucine rich repeat and Ig domain containing 4              | 3.01 | 1.58 | 0.03 |
|              |           |           |        |                                                             |      |      |      |
| A_51_P414448 | NM_053089 | Naa15     | 74838  | N(alpha)-acetyltransferase 15, NatA auxiliary subunit       | 2.73 | 1.58 | 0.07 |
| A_52_P628741 | NM_133985 | Oxsr1     | 108737 | oxidative-stress responsive 1                               | 3.88 | 1.58 | 0.00 |

|              |           |           |        |                                                                        |      |      |      |
|--------------|-----------|-----------|--------|------------------------------------------------------------------------|------|------|------|
| A_51_P216527 | NM_145355 | Rnf185    | 193670 | ring finger protein 185                                                | 3.17 | 1.58 | 0.02 |
| A_52_P218039 | AK039642  | Carkd     | 69225  | carbohydrate kinase domain containing                                  | 2.83 | 1.58 | 0.05 |
| A_51_P207570 | NM_030064 | Phf23     | 78246  | PHD finger protein 23                                                  | 3.04 | 1.57 | 0.03 |
| A_51_P119106 | NM_008774 | Pabpc1    | 18458  | poly(A) binding protein, cytoplasmic 1                                 | 2.90 | 1.57 | 0.04 |
| A_52_P100199 | NM_172511 | Abhd10    | 213012 | abhydrolase domain containing 10                                       | 2.89 | 1.57 | 0.04 |
| A_52_P186352 | NA        | NA        | NA     | NA                                                                     | 3.01 | 1.57 | 0.03 |
| A_51_P113769 | AK037868  | Glyr1     | 74022  | glyoxylate reductase 1 homolog (Arabidopsis)                           | 2.82 | 1.57 | 0.05 |
| A_51_P384609 | BC080729  | Ddx10     | 77591  | DEAD (Asp-Glu-Ala-Asp) box polypeptide 10                              | 3.01 | 1.57 | 0.03 |
| A_51_P114910 | NM_007793 | Cstb      | 13014  | cystatin B                                                             | 2.72 | 1.57 | 0.07 |
| A_51_P279050 | NM_008444 | Kif3b     | 16569  | kinesin family member 3B                                               | 4.52 | 1.57 | 0.00 |
| A_51_P470503 | NM_178069 | Lsg1      | 224092 | large subunit GTPase 1 homolog (S. cerevisiae)                         | 2.97 | 1.57 | 0.03 |
| A_52_P659762 | NM_198425 | Eid2      | 386655 | EP300 interacting inhibitor of differentiation 2                       | 2.73 | 1.57 | 0.07 |
| A_51_P273005 | NM_009611 | Actl7a    | 11470  | actin-like 7a                                                          | 2.82 | 1.57 | 0.05 |
| A_51_P195393 | NM_025859 | Arl1      | 104303 | ADP-ribosylation factor-like 1                                         | 2.76 | 1.57 | 0.06 |
| A_51_P108051 | NM_011874 | Psmc4     | 23996  | 4                                                                      | 3.66 | 1.57 | 0.01 |
| A_52_P256399 | NM_026518 | Rnf146    | 68031  | ring finger protein 146                                                | 2.72 | 1.57 | 0.07 |
| A_51_P123805 | XM_355637 | NA        | NA     | NA                                                                     | 3.71 | 1.57 | 0.01 |
| A_52_P668903 | NA        | NA        | NA     | NA                                                                     | 3.40 | 1.57 | 0.01 |
| A_51_P294778 | NM_172738 | 5730403M  | 232853 | RIKEN cDNA 5730403M16 gene                                             | 3.84 | 1.57 | 0.00 |
| A_52_P615274 | NM_026001 | Rnaseh2b  | 67153  | ribonuclease H2, subunit B                                             | 3.14 | 1.57 | 0.02 |
| A_51_P321643 | NM_173371 | H6pd      | 100198 | hexose-6-phosphate dehydrogenase (glucose 1-dehydrogenase)             | 2.77 | 1.57 | 0.06 |
| A_52_P290069 | AK019587  | 1700001J0 | 78126  | RIKEN cDNA 1700001J04 gene                                             | 2.86 | 1.57 | 0.05 |
| A_52_P557477 | AK129111  | Zfp609    | 214812 | zinc finger protein 609                                                | 3.48 | 1.57 | 0.01 |
| A_51_P226016 | NM_011774 | Slc30a4   | 22785  | solute carrier family 30 (zinc transporter), member 4                  | 2.79 | 1.57 | 0.05 |
| A_51_P421182 | NM_025575 | Sys1      | 66460  | SYS1 Golgi-localized integral membrane protein homolog (S. cerevisiae) | 2.91 | 1.57 | 0.04 |
| A_52_P418884 | NM_017464 | Nedd9     | 18003  | neural precursor cell expressed, developmentally down-regulated gene 9 | 3.86 | 1.57 | 0.00 |
| A_51_P136288 | NM_021718 | Ms4a4b    | 60361  | membrane-spanning 4-domains, subfamily A, member 4B                    | 2.87 | 1.57 | 0.04 |
| A_51_P499195 | NM_024253 | Nkg7      | 72310  | natural killer cell group 7 sequence                                   | 3.17 | 1.57 | 0.02 |

|              |           |           |        |                                                                  |      |      |      |
|--------------|-----------|-----------|--------|------------------------------------------------------------------|------|------|------|
| A_51_P519314 | NM_025922 | Itpa      | 16434  | inosine triphosphatase (nucleoside triphosphate pyrophosphatase) | 2.73 | 1.57 | 0.07 |
| A_51_P142346 | NM_178912 | Fancm     | 104806 | Fanconi anemia, complementation group M                          | 2.76 | 1.57 | 0.06 |
| A_51_P388847 | NM_145934 | Stap2     | 106766 | signal transducing adaptor family member 2                       | 4.33 | 1.57 | 0.00 |
| A_51_P389957 | NM_016758 | Rgs14     | 51791  | regulator of G-protein signaling 14                              | 4.31 | 1.57 | 0.00 |
| A_51_P243914 | NM_018773 | Skap2     | 54353  | src family associated phosphoprotein 2                           | 3.66 | 1.56 | 0.01 |
| A_51_P186053 | NM_026041 | Rrp15     | 67223  | ribosomal RNA processing 15 homolog ( <i>S. cerevisiae</i> )     | 3.01 | 1.56 | 0.03 |
| A_52_P883560 | AK047935  | NA        | NA     | NA                                                               | 3.10 | 1.56 | 0.02 |
| A_51_P402909 | NM_010877 | Ncf2      | 17970  | neutrophil cytosolic factor 2                                    | 3.07 | 1.56 | 0.02 |
| A_52_P647408 | AK050859  | Gspt2     | 14853  | G1 to S phase transition 2                                       | 3.10 | 1.56 | 0.02 |
| A_51_P391996 | BC011329  | Pgd       | 110208 | phosphogluconate dehydrogenase                                   | 2.92 | 1.56 | 0.04 |
| A_52_P15212  | NM_009980 | Ctbp2     | 13017  | C-terminal binding protein 2                                     | 3.65 | 1.56 | 0.01 |
| A_52_P266916 | NM_001025 | Otud7b    | 229603 | OTU domain containing 7B                                         | 2.82 | 1.56 | 0.05 |
| A_51_P424781 | NM_025323 | 0610009D0 | 66055  | RIKEN cDNA 0610009D07 gene                                       | 3.83 | 1.56 | 0.00 |
| A_52_P478532 | BC043060  | Sfrs13a   | 14105  | splicing factor, arginine/serine-rich 13A                        | 4.82 | 1.56 | 0.00 |
| A_51_P500424 | NM_133763 | Dnttip1   | 76233  | deoxynucleotidyltransferase, terminal, interacting protein 1     | 3.48 | 1.56 | 0.01 |
| A_51_P320466 | NM_011299 | Rps6ka2   | 20112  | ribosomal protein S6 kinase, polypeptide 2                       | 2.86 | 1.56 | 0.05 |
| A_51_P232705 | NM_029635 | Commd9    | 76501  | COMM domain containing 9                                         | 3.49 | 1.56 | 0.01 |
| A_51_P450682 | NM_199455 | Tepp      | 73407  | testis, prostate and placenta expressed                          | 2.84 | 1.56 | 0.05 |
| A_52_P84096  | BC011329  | Pgd       | 110208 | phosphogluconate dehydrogenase                                   | 3.13 | 1.56 | 0.02 |
| A_51_P123077 | NM_011955 | Nubp1     | 26425  | nucleotide binding protein 1                                     | 3.18 | 1.56 | 0.02 |
| A_52_P484081 | NM_023230 | Ube2v1    | 66589  | ubiquitin-conjugating enzyme E2 variant 1                        | 2.89 | 1.56 | 0.04 |
| A_52_P207964 | NM_025878 | Mrps18b   | 66973  | mitochondrial ribosomal protein S18B                             | 3.17 | 1.55 | 0.02 |
| A_52_P340700 | NM_172395 | Cdc42se1  | 57912  | CDC42 small effector 1                                           | 2.84 | 1.55 | 0.05 |
| A_52_P598674 | BC031204  | Ccdc14    | 239839 | coiled-coil domain containing 14                                 | 3.62 | 1.55 | 0.01 |
| A_52_P249611 | NM_021313 | Rnf25     | 57751  | ring finger protein 25                                           | 3.38 | 1.55 | 0.01 |
| A_52_P495224 | NM_029447 | Nln       | 75805  | neurolysin (metallopeptidase M3 family)                          | 2.84 | 1.55 | 0.05 |
| A_52_P542005 | NM_025644 | Exosc1    | 66583  | exosome component 1                                              | 3.15 | 1.55 | 0.02 |
| A_52_P83386  | NM_028932 | Eaf1      | 74427  | ELL associated factor 1                                          | 3.50 | 1.55 | 0.01 |
| A_52_P149250 | NM_012042 | Cul1      | 26965  | cullin 1                                                         | 2.81 | 1.55 | 0.05 |
| A_51_P492893 | NM_028767 | Foxp4     | 74123  | forkhead box P4                                                  | 2.85 | 1.55 | 0.05 |
| A_52_P375764 | NM_009444 | Tgoln2    | 22135  | trans-golgi network protein 2                                    | 3.45 | 1.55 | 0.01 |

|              |           |            |        |                                                                                    |      |      |      |
|--------------|-----------|------------|--------|------------------------------------------------------------------------------------|------|------|------|
| A_52_P177271 | NM_001039 | MtI5       | 17771  | metallothionein-like 5, testis-specific (tesmin)                                   | 2.91 | 1.55 | 0.04 |
| A_51_P197252 | NM_025884 | Zfp830     | 66983  | zinc finger protein 830                                                            | 2.76 | 1.55 | 0.06 |
| A_51_P154222 | NM_053092 | Kars       | 85305  | lysyl-tRNA synthetase                                                              | 3.28 | 1.55 | 0.01 |
| A_51_P272005 | NM_146200 | Eif3c      | 56347  | eukaryotic translation initiation factor 3, subunit C                              | 3.66 | 1.55 | 0.01 |
| A_52_P627177 | NM_010833 | Msn        | 17698  | moesin                                                                             | 2.90 | 1.55 | 0.04 |
| A_51_P242930 | NM_020044 | Lat2       | 56743  | linker for activation of T cells family, member 2                                  | 5.31 | 1.55 | 0.00 |
| A_52_P659258 | BC023841  | Ppat       | 231327 | phosphoribosyl pyrophosphate amidotransferase                                      | 3.47 | 1.55 | 0.01 |
| A_52_P466887 | NM_001077 | Hnrnpd     | 11991  | heterogeneous nuclear ribonucleoprotein D                                          | 2.91 | 1.55 | 0.04 |
| A_51_P195153 | NM_013882 | Gtse1      | 29870  | G two S phase expressed protein 1                                                  | 3.02 | 1.55 | 0.03 |
| A_52_P131372 | XM_913504 | LOC633908  | 633908 | similar to 40S ribosomal protein S19                                               | 2.88 | 1.55 | 0.04 |
| A_52_P298933 | NM_198619 | 2810408P1  | 242747 | RIKEN cDNA 2810408P10 gene                                                         | 2.87 | 1.55 | 0.04 |
| A_51_P511060 | NM_030165 | Csgalnact2 | 78752  | chondroitin sulfate N-acetylgalactosaminyltransferase 2                            | 3.09 | 1.55 | 0.02 |
| A_52_P178998 | NM_174997 | Fam168b    | 214469 | family with sequence similarity 168, member B                                      | 2.94 | 1.54 | 0.04 |
| A_52_P619388 | NA        | NA         | NA     | NA                                                                                 | 2.75 | 1.54 | 0.06 |
| A_51_P200027 | NM_026148 | Lims1      | 110829 | LIM and senescent cell antigen-like domains 1                                      | 2.78 | 1.54 | 0.05 |
| A_52_P7400   | NM_007793 | Cstb       | 13014  | cystatin B                                                                         | 3.08 | 1.54 | 0.02 |
| A_51_P185775 | NM_028873 | Dnajc14    | 74330  | Dnaj (Hsp40) homolog, subfamily C, member 14                                       | 3.43 | 1.54 | 0.01 |
| A_51_P216147 | NM_007927 | Emd        | 13726  | emerin                                                                             | 2.95 | 1.54 | 0.03 |
| A_52_P395064 | NM_033072 | Mbd6       | 110962 | methyl-CpG binding domain protein 6                                                | 2.73 | 1.54 | 0.07 |
| A_51_P415945 | NM_008944 | Psm2       | 19166  | proteasome (prosome, macropain) subunit, alpha type 2                              | 3.01 | 1.54 | 0.03 |
| A_51_P118223 | BC061236  | Wdr70      | 545085 | WD repeat domain 70                                                                | 2.78 | 1.54 | 0.05 |
| A_52_P843431 | AK052308  | NA         | NA     | NA                                                                                 | 2.72 | 1.54 | 0.07 |
| A_51_P170371 | NM_031165 | Hspa8      | 15481  | heat shock protein 8                                                               | 3.02 | 1.54 | 0.03 |
| A_51_P483379 | NM_011275 | Rnaseh1    | 19819  | ribonuclease H1                                                                    | 2.97 | 1.54 | 0.03 |
| A_51_P141288 | NM_010693 | Lck        | 16818  | lymphocyte protein tyrosine kinase                                                 | 3.80 | 1.54 | 0.00 |
| A_51_P346214 | NM_013529 | Gfpt2      | 14584  | glutamine fructose-6-phosphate transaminase 2                                      | 3.37 | 1.54 | 0.01 |
| A_51_P320786 | NM_019726 | Gps2       | 56310  | G protein pathway suppressor 2                                                     | 2.74 | 1.54 | 0.07 |
| A_52_P111715 | NM_172451 | Galnt6     | 207839 | UDP-N-acetyl-alpha-D-galactosamine:polypeptide N-acetylgalactosaminyltransferase 6 | 3.37 | 1.53 | 0.01 |

|               |           |            |        |                                                                                                      |      |      |      |
|---------------|-----------|------------|--------|------------------------------------------------------------------------------------------------------|------|------|------|
| A_52_P216311  | XM_890447 | Mllt4      | 17356  | myeloid/lymphoid or mixed-lineage leukemia (trithorax homolog, Drosophila); translocated to, 4       | 3.13 | 1.53 | 0.02 |
| A_51_P289223  | NM_010718 | Limk2      | 16886  | LIM motif-containing protein kinase 2                                                                | 3.20 | 1.53 | 0.02 |
| A_52_P497625  | AK041324  | A630001G21 | 319997 | RIKEN cDNA A630001G21 gene                                                                           | 3.75 | 1.53 | 0.00 |
| A_52_P193823  | AK053431  | Rpl9       | 20005  | ribosomal protein L9                                                                                 | 3.30 | 1.53 | 0.01 |
| A_51_P320477  | NA        | NA         | NA     | NA                                                                                                   | 2.85 | 1.53 | 0.05 |
| A_51_P339023  | NM_175445 | Rassf2     | 215653 | Ras association (RalGDS/AF-6) domain family member 2                                                 | 3.80 | 1.53 | 0.00 |
| A_52_P101218  | NM_153178 | Eif2c2     | 239528 | eukaryotic translation initiation factor 2C, 2                                                       | 2.85 | 1.53 | 0.05 |
| A_51_P299031  | AK087072  | NA         | NA     | NA                                                                                                   | 2.96 | 1.53 | 0.03 |
| A_52_P1184000 | NM_175294 | Nucks1     | 98415  | nuclear casein kinase and cyclin-dependent kinase substrate 1                                        | 3.14 | 1.53 | 0.02 |
| A_51_P519837  | NM_138585 | Cherp      | 27967  | calcium homeostasis endoplasmic reticulum protein                                                    | 3.29 | 1.53 | 0.01 |
| A_51_P281844  | AK129336  | Myef2      | 17876  | myelin basic protein expression factor 2, repressor                                                  | 3.24 | 1.53 | 0.01 |
| A_52_P99531   | NM_199056 | lppk       | 75678  | inositol 1,3,4,5,6-pentakisphosphate 2-kinase                                                        | 2.79 | 1.53 | 0.05 |
| A_51_P411225  | NM_153138 | Wipf1      | 215280 | WAS/WASL interacting protein family, member 1 mediator of RNA polymerase II transcription, subunit 8 | 3.13 | 1.53 | 0.02 |
| A_51_P376313  | NM_173719 | Med8       | 80509  | homolog (yeast)                                                                                      | 2.89 | 1.53 | 0.04 |
| A_51_P451606  | NM_011448 | Sox9       | 20682  | SRY-box containing gene 9                                                                            | 3.21 | 1.53 | 0.02 |
| A_52_P198993  | NM_133847 | Tm9sf4     | 99237  | transmembrane 9 superfamily protein member 4                                                         | 3.25 | 1.53 | 0.01 |
| A_51_P115666  | NM_134087 | Fam83h     | 105732 | family with sequence similarity 83, member H                                                         | 3.94 | 1.53 | 0.00 |
| A_51_P179041  | D87966    | Tead4      | 21679  | TEA domain family member 4                                                                           | 4.38 | 1.53 | 0.00 |
| A_51_P174335  | NM_009095 | Rps5       | 20103  | ribosomal protein S5                                                                                 | 3.10 | 1.53 | 0.02 |
| A_52_P555583  | AK019946  | 5430417C01 | 78548  | RIKEN cDNA 5430417C01 gene                                                                           | 2.73 | 1.53 | 0.07 |
| A_52_P422675  | BC090960  | Hook3      | 320191 | hook homolog 3 (Drosophila)                                                                          | 2.88 | 1.52 | 0.04 |
| A_52_P262096  | NM_029955 | Ccdc93     | 70829  | coiled-coil domain containing 93                                                                     | 3.31 | 1.52 | 0.01 |
| A_51_P104960  | NM_008947 | Psmc1      | 19179  | protease (prosome, macropain) 26S subunit, ATPase 1 myeloid/lymphoid or mixed lineage-leukemia       | 2.73 | 1.52 | 0.07 |
| A_52_P949005  | XM_892614 | Gm6809     | 627912 | translocation to 4 homolog pseudogene                                                                | 2.84 | 1.52 | 0.05 |
| A_52_P69740   | NA        | NA         | NA     | NA                                                                                                   | 2.84 | 1.52 | 0.05 |



|              |           |                 |        |                                                                                                       |      |      |      |
|--------------|-----------|-----------------|--------|-------------------------------------------------------------------------------------------------------|------|------|------|
| A_52_P445828 | NM_013853 | Abcf2           | 27407  | ATP-binding cassette, sub-family F (GCN20), member 2                                                  | 2.85 | 1.52 | 0.05 |
| A_51_P475076 | NM_011692 | Vbp1            | 22327  | von Hippel-Lindau binding protein 1                                                                   | 3.69 | 1.52 | 0.01 |
| A_52_P298071 | NM_030100 | Wibg            | 78428  | within bgcn homolog (Drosophila)                                                                      | 3.60 | 1.52 | 0.01 |
| A_52_P441937 | NM_178932 | Aoc2            | 237940 | amine oxidase, copper containing 2 (retina-specific)<br>ankyrin repeat and sterile alpha motif domain | 3.30 | 1.52 | 0.01 |
| A_52_P594430 | NM_028301 | Anks3           | 72615  | containing 3                                                                                          | 3.14 | 1.52 | 0.02 |
| A_52_P42976  | NM_027352 | Gorasp2         | 70231  | golgi reassembly stacking protein 2                                                                   | 2.79 | 1.52 | 0.05 |
| A_51_P438821 | NM_023258 | Pycard          | 66824  | PYD and CARD domain containing                                                                        | 3.30 | 1.52 | 0.01 |
| A_51_P357195 | XM_132740 | NA              | NA     | NA                                                                                                    | 3.08 | 1.52 | 0.02 |
| A_51_P246527 | NM_009418 | Tpp2            | 22019  | tripeptidyl peptidase II                                                                              | 2.72 | 1.52 | 0.07 |
| A_51_P375431 | XM_358384 | NA              | NA     | NA                                                                                                    | 3.72 | 1.52 | 0.01 |
| A_51_P305693 | NM_175238 | Rif1            | 51869  | Rap1 interacting factor 1 homolog (yeast)                                                             | 2.92 | 1.52 | 0.04 |
| A_51_P172412 | NM_027882 | Cic             | 71722  | capicua homolog (Drosophila)                                                                          | 2.87 | 1.52 | 0.04 |
| A_51_P285137 | XM_358382 | Dmxd2           | 235380 | Dmx-like 2                                                                                            | 2.77 | 1.52 | 0.05 |
| A_52_P87987  | AK089612  | F830004M:320224 |        | RIKEN cDNA F830004M19 gene                                                                            | 2.79 | 1.52 | 0.05 |
| A_52_P38659  | NM_029992 | Tchp            | 77832  | trichoplein, keratin filament binding<br>Smg-5 homolog, nonsense mediated mRNA decay factor           | 2.86 | 1.52 | 0.05 |
| A_51_P365399 | NM_178246 | Smg5            | 229512 | (C. elegans)                                                                                          | 3.24 | 1.52 | 0.01 |
| A_51_P306527 | NM_011738 | Ywhah           | 22629  | tyrosine 3-monooxygenase/tryptophan 5-<br>monooxygenase activation protein, eta polypeptide           | 2.75 | 1.52 | 0.06 |
| A_52_P260339 | NM_010492 | Ica1            | 15893  | islet cell autoantigen 1                                                                              | 2.93 | 1.52 | 0.04 |
| A_51_P159746 | NM_025937 | Nkap            | 67050  | NFKB activating protein                                                                               | 2.83 | 1.51 | 0.05 |
| A_51_P265576 | NM_026434 | Rbm18           | 67889  | RNA binding motif protein 18                                                                          | 2.94 | 1.51 | 0.04 |
| A_52_P582281 | NM_201226 | Lrrc47          | 72946  | leucine rich repeat containing 47                                                                     | 3.46 | 1.51 | 0.01 |
| A_51_P473498 | NM_173398 | Gpr171          | 229323 | G protein-coupled receptor 171                                                                        | 3.50 | 1.51 | 0.01 |
| A_52_P584335 | NM_008034 | Folr1           | 14275  | folate receptor 1 (adult)                                                                             | 2.89 | 1.51 | 0.04 |
| A_52_P635898 | NM_010864 | Myo5a           | 17918  | myosin VA                                                                                             | 3.11 | 1.51 | 0.02 |
| A_52_P407602 | NA        | NA              | NA     | NA                                                                                                    | 3.21 | 1.51 | 0.02 |
| A_51_P463060 | NM_144805 | Tmem40          | 94346  | transmembrane protein 40                                                                              | 3.13 | 1.51 | 0.02 |
| A_52_P351638 | NM_020275 | Tnfrsf10b       | 21933  | tumor necrosis factor receptor superfamily, member<br>10b                                             | 2.89 | 1.51 | 0.04 |

|              |           |            |        |                                                                     |      |      |      |
|--------------|-----------|------------|--------|---------------------------------------------------------------------|------|------|------|
| A_51_P189343 | NM_144941 | Mtap7d1    | 245877 | microtubule-associated protein 7 domain containing 1                | 2.95 | 1.51 | 0.03 |
| A_51_P463570 | NM_001042 | Mast2      | 17776  | microtubule associated serine/threonine kinase 2                    | 3.16 | 1.51 | 0.02 |
| A_51_P324572 | NM_009818 | Ctnna1     | 12385  | catenin (cadherin associated protein), alpha 1                      | 2.91 | 1.51 | 0.04 |
| A_51_P208020 | AK004783  | Ulk3       | 71742  | unc-51-like kinase 3 (C. elegans)                                   | 3.11 | 1.51 | 0.02 |
| A_52_P455540 | NM_001013 | Ric8b      | 237422 | resistance to inhibitors of cholinesterase 8 homolog B (C. elegans) | 3.15 | 1.51 | 0.02 |
| A_51_P436051 | NM_025383 | Necap2     | 66147  | NECAP endocytosis associated 2                                      | 2.89 | 1.51 | 0.04 |
| A_52_P508053 | NM_026072 | Cwc27      | 67285  | CWC27 spliceosome-associated protein homolog (S. cerevisiae)        | 3.60 | 1.51 | 0.01 |
| A_52_P165842 | X80434    | Cirh1a     | 21771  | cirrrosis, autosomal recessive 1A (human)                           | 2.97 | 1.51 | 0.03 |
| A_52_P507578 | NM_030710 | Slamf6     | 30925  | SLAM family member 6                                                | 2.95 | 1.51 | 0.03 |
| A_52_P570122 | NA        | NA         | NA     | NA                                                                  | 3.33 | 1.50 | 0.01 |
| A_52_P381303 | BC082565  | Gins2      | 272551 | GIN5 complex subunit 2 (Psf2 homolog)                               | 3.28 | 1.50 | 0.01 |
| A_52_P378406 | NM_025517 | Rtcd1      | 66368  | RNA terminal phosphate cyclase domain 1                             | 2.92 | 1.50 | 0.04 |
| A_52_P456629 | NM_027296 | Trnt1      | 70047  | tRNA nucleotidyl transferase, CCA-adding, 1                         | 2.75 | 1.50 | 0.06 |
| A_51_P401730 | NM_175153 | 2010321M09 | 69882  | RIKEN cDNA 2010321M09 gene                                          | 2.79 | 1.50 | 0.05 |
| A_52_P630502 | NM_023200 | Ppp1r7     | 66385  | protein phosphatase 1, regulatory (inhibitor) subunit 7             | 3.33 | 1.50 | 0.01 |
| A_51_P498023 | NM_023912 | Scyl1      | 78891  | SCY1-like 1 (S. cerevisiae)                                         | 3.08 | 1.50 | 0.02 |
| A_52_P426863 | NM_178643 | C230052I1  | 101831 | RIKEN cDNA C230052I12 gene                                          | 2.81 | 1.50 | 0.05 |
| A_51_P170946 | NM_029804 | Hnrnpm     | 76936  | heterogeneous nuclear ribonucleoprotein M                           | 3.06 | 1.50 | 0.02 |
| A_51_P439824 | NM_018771 | Gipc1      | 67903  | GIPC PDZ domain containing family, member 1                         | 2.79 | 1.50 | 0.05 |
| A_51_P140171 | NM_024173 | Atp6v1g1   | 66290  | ATPase, H+ transporting, lysosomal V1 subunit G1                    | 3.25 | 1.50 | 0.01 |
| A_52_P223080 | NM_144892 | Ncoa5      | 228869 | nuclear receptor coactivator 5                                      | 3.42 | 1.50 | 0.01 |
| A_52_P370443 | NM_024182 | Riok3      | 66878  | RIO kinase 3 (yeast)                                                | 3.04 | 1.50 | 0.03 |
| A_51_P235002 | NM_011598 | Fabp9      | 21884  | fatty acid binding protein 9, testis                                | 3.30 | 1.50 | 0.01 |
| A_51_P163079 | NM_133735 | Ptcd1      | 71799  | pentatricopeptide repeat domain 1                                   | 3.18 | 1.50 | 0.02 |
| A_52_P493322 | NM_177899 | D330038O06 | 330788 | RIKEN cDNA D330038O06 gene                                          | 3.70 | 1.50 | 0.01 |
| A_52_P375016 | NM_173364 | Zfp445     | 235682 | zinc finger protein 445                                             | 3.06 | 1.50 | 0.02 |
| A_51_P138744 | NM_019933 | Ptpn4      | 19258  | protein tyrosine phosphatase, non-receptor type 4                   | 3.30 | 1.49 | 0.01 |
| A_52_P378629 | AK032099  | Dmxl2      | 235380 | Dmx-like 2                                                          | 3.19 | 1.49 | 0.02 |

|              |           |           |        |                                                                    |      |      |      |
|--------------|-----------|-----------|--------|--------------------------------------------------------------------|------|------|------|
| A_52_P242973 | NM_019951 | Sec11a    | 56529  | SEC11 homolog A ( <i>S. cerevisiae</i> )                           | 3.16 | 1.49 | 0.02 |
| A_51_P328789 | NM_172254 | Dph3      | 105638 | DPH3 homolog (KTI11, <i>S. cerevisiae</i> )                        | 2.88 | 1.49 | 0.04 |
| A_52_P537050 | NM_016723 | Uchl3     | 50933  | ubiquitin carboxyl-terminal esterase L3 (ubiquitin thiolesterase)  | 2.97 | 1.49 | 0.03 |
| A_51_P341066 | NM_001029 | Slc       | 20491  | src-like adaptor                                                   | 2.74 | 1.49 | 0.07 |
| A_52_P489079 | NM_020506 | Xpo4      | 57258  | exportin 4                                                         | 2.85 | 1.49 | 0.05 |
| A_52_P74427  | NM_028152 | Mms19     | 72199  | MMS19 (MET18 <i>S. cerevisiae</i> )                                | 2.83 | 1.49 | 0.05 |
| A_52_P112816 | NM_019501 | Pdss1     | 56075  | prenyl (solanesyl) diphosphate synthase, subunit 1                 | 3.22 | 1.49 | 0.02 |
| A_51_P196158 | NM_025295 | Btd       | 26363  | biotinidase                                                        | 3.21 | 1.49 | 0.02 |
| A_52_P324825 | NM_175414 | Tspan9    | 109246 | tetraspanin 9                                                      | 2.90 | 1.49 | 0.04 |
| A_51_P393726 | NM_173865 | Slc41a1   | 98396  | solute carrier family 41, member 1                                 | 2.94 | 1.49 | 0.04 |
| A_51_P471779 | NM_026737 | Phf5a     | 68479  | PHD finger protein 5A                                              | 3.48 | 1.49 | 0.01 |
| A_52_P691944 | AK089339  | NA        | NA     | NA                                                                 | 2.83 | 1.49 | 0.05 |
| A_51_P212023 | NM_016926 | Sart3     | 53890  | squamous cell carcinoma antigen recognized by T-cells 3            | 2.98 | 1.49 | 0.03 |
| A_51_P350222 | NM_001013 | Dync1li2  | 234663 | dynein, cytoplasmic 1 light intermediate chain 2                   | 2.78 | 1.49 | 0.05 |
| A_52_P654618 | NM_001005 | Znhit3    | 448850 | zinc finger, HIT type 3                                            | 2.90 | 1.48 | 0.04 |
| A_51_P238643 | NM_021876 | Eed       | 13626  | embryonic ectoderm development                                     | 3.12 | 1.48 | 0.02 |
| A_52_P603635 | NM_019661 | Ykt6      | 56418  | YKT6 homolog ( <i>S. Cerevisiae</i> )                              | 3.10 | 1.48 | 0.02 |
| A_52_P557837 | NA        | NA        | NA     | NA                                                                 | 4.04 | 1.48 | 0.00 |
| A_51_P365964 | NM_144884 | Tor1a     | 30931  | torsin family 1, member A (torsin A)                               | 2.86 | 1.48 | 0.05 |
| A_51_P257934 | NM_033622 | Tnfsf13b  | 24099  | tumor necrosis factor (ligand) superfamily, member 13b             | 2.85 | 1.48 | 0.05 |
| A_52_P232763 | NM_008635 | Mtap7     | 17761  | microtubule-associated protein 7                                   | 2.81 | 1.48 | 0.05 |
| A_52_P370022 | NA        | NA        | NA     | NA                                                                 | 2.74 | 1.48 | 0.07 |
| A_52_P537381 | NM_025447 | Dimt1     | 66254  | DIM1 dimethyladenosine transferase 1-like ( <i>S. cerevisiae</i> ) | 2.95 | 1.48 | 0.03 |
| A_52_P182118 | NA        | NA        | NA     | NA                                                                 | 2.79 | 1.48 | 0.05 |
| A_52_P476602 | NM_026203 | Ahi1      | 52906  | Abelson helper integration site 1                                  | 2.96 | 1.48 | 0.03 |
| A_52_P523473 | NM_172487 | Prrt3     | 210673 | proline-rich transmembrane protein 3                               | 2.93 | 1.47 | 0.04 |
| A_51_P414529 | NM_172396 | 9130011J1 | 66818  | RIKEN cDNA 9130011J15 gene                                         | 3.02 | 1.47 | 0.03 |
| A_52_P463009 | NM_013923 | Rnf19a    | 30945  | ring finger protein 19A                                            | 3.27 | 1.47 | 0.01 |
| A_51_P235580 | NM_022994 | Dap3      | 65111  | death associated protein 3                                         | 2.76 | 1.47 | 0.06 |

|              |           |           |        |                                                                        |      |      |      |
|--------------|-----------|-----------|--------|------------------------------------------------------------------------|------|------|------|
| A_51_P255142 | NM_016916 | Blcap     | 53619  | bladder cancer associated protein homolog (human)                      | 3.04 | 1.47 | 0.03 |
| A_52_P78123  | NM_026893 | Dcaf12    | 68970  | DDB1 and CUL4 associated factor 12                                     | 3.69 | 1.47 | 0.01 |
| A_52_P504302 | NM_173180 | Pmpca     | 66865  | peptidase (mitochondrial processing) alpha                             | 3.41 | 1.47 | 0.01 |
| A_52_P258291 | NM_011808 | Ets1      | 23871  | E26 avian leukemia oncogene 1, 5' domain                               | 2.74 | 1.47 | 0.07 |
| A_51_P508947 | NM_023153 | Cwc15     | 66070  | CWC15 homolog ( <i>S. cerevisiae</i> )                                 | 2.91 | 1.47 | 0.04 |
| A_51_P515741 | XM_894489 | NA        | NA     | NA                                                                     | 3.20 | 1.47 | 0.02 |
| A_51_P327021 | NM_028356 | Zbtb25    | 109929 | zinc finger and BTB domain containing 25                               | 4.05 | 1.47 | 0.00 |
| A_52_P72587  | NM_008859 | Prkcq     | 18761  | protein kinase C, theta                                                | 3.26 | 1.47 | 0.01 |
| A_51_P343556 | NM_175565 | Cdv3      | 321022 | carnitine deficiency-associated gene expressed in ventricle 3          | 3.09 | 1.46 | 0.02 |
| A_52_P40168  | NA        | NA        | NA     | NA                                                                     | 3.00 | 1.46 | 0.03 |
| A_51_P358792 | NM_145547 | Zfp189    | 230162 | zinc finger protein 189                                                | 2.98 | 1.46 | 0.03 |
| A_51_P413866 | NM_008198 | Cfb       | 14962  | complement factor B                                                    | 3.37 | 1.46 | 0.01 |
| A_51_P181691 | NM_145857 | Nod2      | 257632 | nucleotide-binding oligomerization domain containing 2                 | 2.86 | 1.46 | 0.05 |
| A_51_P114551 | NM_028754 | 0610037L1 | 74098  | RIKEN cDNA 0610037L13 gene                                             | 3.06 | 1.46 | 0.02 |
| A_51_P337662 | NM_172779 | Ddx26b    | 236790 | DEAD/H (Asp-Glu-Ala-Asp/His) box polypeptide 26B                       | 2.74 | 1.46 | 0.07 |
| A_51_P489966 | NM_009321 | Tbca      | 21371  | tubulin cofactor A                                                     | 2.99 | 1.46 | 0.03 |
| A_51_P161315 | XM_127223 | 4930448F1 | 73992  | RIKEN cDNA 4930448F12 gene                                             | 2.84 | 1.46 | 0.05 |
| A_52_P502141 | NM_172637 | Hectd2    | 226098 | HECT domain containing 2                                               | 2.88 | 1.46 | 0.04 |
| A_51_P452109 | AK009711  | Wdr20a    | 69641  | WD repeat domain 20A                                                   | 2.93 | 1.46 | 0.04 |
| A_51_P187491 | NM_053087 | Epgn      | 71920  | epithelial mitogen                                                     | 3.27 | 1.46 | 0.01 |
| A_52_P100028 | NM_009035 | Rbpj      | 19664  | recombination signal binding protein for immunoglobulin kappa J region | 3.38 | 1.46 | 0.01 |
| A_51_P267634 | NM_178751 | Orai2     | 269717 | ORAI calcium release-activated calcium modulator 2                     | 2.73 | 1.45 | 0.07 |
| A_52_P541344 | NM_018729 | Cd244     | 18106  | CD244 natural killer cell receptor 2B4                                 | 3.81 | 1.45 | 0.00 |
| A_51_P386046 | AK034280  | Uba5      | 66663  | ubiquitin-like modifier activating enzyme 5                            | 3.37 | 1.45 | 0.01 |
| A_52_P540302 | NA        | NA        | NA     | NA                                                                     | 2.79 | 1.45 | 0.05 |
| A_52_P287456 | NM_145523 | Gca       | 227960 | grancalcin                                                             | 3.69 | 1.45 | 0.01 |
| A_52_P59070  | AK012972  | 2810403D2 | 69964  | RIKEN cDNA 2810403D21 gene                                             | 4.21 | 1.45 | 0.00 |
| A_52_P273438 | NA        | NA        | NA     | NA                                                                     | 4.04 | 1.45 | 0.00 |

|              |           |           |        |                                                                                                         |      |      |      |
|--------------|-----------|-----------|--------|---------------------------------------------------------------------------------------------------------|------|------|------|
| A_51_P416397 | NM_145476 | Tbc1d22a  | 223754 | TBC1 domain family, member 22a<br>vesicle-associated membrane protein, associated                       | 3.19 | 1.45 | 0.02 |
| A_51_P361788 | NM_013933 | Vapa      | 30960  | protein A                                                                                               | 3.23 | 1.45 | 0.01 |
| A_52_P563280 | NM_001024 | BC094916  | 545384 | cDNA sequence BC094916                                                                                  | 3.80 | 1.44 | 0.00 |
| A_52_P218568 | AK129091  | Phf16     | 382207 | PHD finger protein 16                                                                                   | 3.36 | 1.44 | 0.01 |
| A_51_P161874 | NM_027212 | Med30     | 69790  | mediator complex subunit 30                                                                             | 3.03 | 1.44 | 0.03 |
| A_52_P503597 | NM_177771 | Klhl18    | 270201 | kelch-like 18 (Drosophila)                                                                              | 2.76 | 1.44 | 0.06 |
| A_51_P489679 | NM_013588 | Lrrc23    | 16977  | leucine rich repeat containing 23                                                                       | 3.66 | 1.44 | 0.01 |
| A_52_P267446 | NM_009282 | Stag1     | 20842  | stromal antigen 1                                                                                       | 3.04 | 1.44 | 0.02 |
| A_51_P271751 | NM_145393 | Ythdf2    | 213541 | YTH domain family 2                                                                                     | 3.49 | 1.44 | 0.01 |
| A_51_P187210 | NM_133702 | Nol11     | 68979  | nucleolar protein 11                                                                                    | 2.88 | 1.44 | 0.04 |
| A_52_P205714 | NM_027133 | Lnp       | 69605  | limb and neural patterns                                                                                | 2.73 | 1.44 | 0.07 |
| A_52_P625244 | NM_011668 | Ube3a     | 22215  | ubiquitin protein ligase E3A                                                                            | 2.89 | 1.44 | 0.04 |
| A_52_P312595 | NA        | NA        | NA     | NA                                                                                                      | 2.90 | 1.44 | 0.04 |
| A_51_P347529 | NM_177898 | Nek5      | 330721 | NIMA (never in mitosis gene a)-related expressed kinase<br>5                                            | 2.73 | 1.44 | 0.07 |
| A_51_P360077 | NM_175414 | Tspan9    | 109246 | tetraspanin 9                                                                                           | 3.07 | 1.43 | 0.02 |
| A_52_P571457 | NM_027642 | Phf6      | 70998  | PHD finger protein 6                                                                                    | 2.90 | 1.43 | 0.04 |
| A_52_P468821 | NM_020267 | Trim44    | 80985  | tripartite motif-containing 44                                                                          | 2.92 | 1.43 | 0.04 |
| A_51_P476711 | NM_028151 | Skiv2l2   | 72198  | superkiller viralicidic activity 2-like 2 (S. cerevisiae)                                               | 2.76 | 1.43 | 0.06 |
| A_52_P39765  | NM_053204 | Erc1      | 111173 | ELKS/RAB6-interacting/CAST family member 1                                                              | 3.58 | 1.43 | 0.01 |
| A_52_P73201  | AK042238  | Tgs1      | 116940 | trimethylguanosine synthase homolog (S. cerevisiae)                                                     | 2.78 | 1.43 | 0.05 |
| A_52_P241725 | AK021208  | C330018D2 | 77422  | RIKEN cDNA C330018D20 gene                                                                              | 3.07 | 1.43 | 0.02 |
| A_52_P612868 | XR_001671 | NA        | NA     | NA                                                                                                      | 3.11 | 1.43 | 0.02 |
| A_51_P170619 | NM_028041 | Ddx54     | 71990  | DEAD (Asp-Glu-Ala-Asp) box polypeptide 54<br>transmembrane emp24-like trafficking protein 10<br>(yeast) | 3.85 | 1.43 | 0.00 |
| A_51_P371993 | NM_026775 | Tmed10    | 68581  | (yeast)                                                                                                 | 2.86 | 1.42 | 0.05 |
| A_51_P430165 | NM_146250 | Gpr1      | 241070 | G protein-coupled receptor 1                                                                            | 3.40 | 1.42 | 0.01 |
| A_51_P215887 | NM_019698 | Aldh18a1  | 56454  | aldehyde dehydrogenase 18 family, member A1                                                             | 2.82 | 1.42 | 0.05 |
| A_52_P481423 | AK129359  | Cttnbp2nl | 80281  | CTTNBP2 N-terminal like                                                                                 | 2.98 | 1.42 | 0.03 |
| A_51_P169783 | AK086378  | Mare      | 17168  | alpha globin regulatory element containing gene                                                         | 2.87 | 1.42 | 0.04 |
| A_52_P579951 | NM_194340 | C330019G0 | 215476 | RIKEN cDNA C330019G07 gene                                                                              | 3.21 | 1.42 | 0.02 |

|              |           |                |        |                                                                                         |      |      |      |
|--------------|-----------|----------------|--------|-----------------------------------------------------------------------------------------|------|------|------|
| A_51_P140731 | NM_013715 | Cops5          | 26754  | COP9 (constitutive photomorphogenic) homolog, subunit 5 ( <i>Arabidopsis thaliana</i> ) | 2.79 | 1.42 | 0.05 |
| A_52_P201232 | NM_028198 | Xpo5           | 72322  | exportin 5                                                                              | 3.32 | 1.42 | 0.01 |
| A_51_P108226 | NM_183249 | 1100001G266107 |        | RIKEN cDNA 1100001G20 gene                                                              | 3.08 | 1.42 | 0.02 |
| A_52_P456271 | NM_025335 | Tmem167        | 66074  | transmembrane protein 167                                                               | 2.87 | 1.42 | 0.04 |
| A_52_P550185 | NM_026615 | Urm1           | 68205  | ubiquitin related modifier 1 homolog ( <i>S. cerevisiae</i> )                           | 3.14 | 1.42 | 0.02 |
| A_52_P458647 | AK021182  | C330006D177616 |        | RIKEN cDNA C330006D17 gene                                                              | 3.04 | 1.41 | 0.02 |
| A_51_P400498 | BC079668  | Whsc1          | 107823 | Wolf-Hirschhorn syndrome candidate 1 (human)                                            | 3.14 | 1.41 | 0.02 |
| A_51_P260721 | NM_016902 | Nphp1          | 53885  | nephronophthisis 1 (juvenile) homolog (human)                                           | 2.88 | 1.41 | 0.04 |
| A_52_P134381 | NM_025894 | Psmd12         | 66997  | proteasome (prosome, macropain) 26S subunit, non-ATPase, 12                             | 3.19 | 1.41 | 0.02 |
| A_52_P349694 | NM_201244 | Copg           | 54161  | coatamer protein complex, subunit gamma                                                 | 3.12 | 1.40 | 0.02 |
| A_51_P184156 | NM_007685 | Cfc1           | 12627  | cripto, FRL-1, cryptic family 1                                                         | 3.05 | 1.40 | 0.02 |
| A_51_P131364 | NM_009151 | Selplg         | 20345  | selectin, platelet (p-selectin) ligand                                                  | 2.83 | 1.40 | 0.05 |
| A_51_P341324 | NM_019785 | Actr10         | 56444  | ARP10 actin-related protein 10 homolog ( <i>S. cerevisiae</i> )                         | 3.53 | 1.40 | 0.01 |
| A_51_P327642 | NM_030560 | Cwc22          | 80744  | CWC22 spliceosome-associated protein homolog ( <i>S. cerevisiae</i> )                   | 3.23 | 1.40 | 0.02 |
| A_52_P378056 | XM_978851 | Gm8062         | 666360 | predicted gene 8062                                                                     | 3.33 | 1.40 | 0.01 |
| A_52_P336713 | NM_001033 | Nom1           | 433864 | nucleolar protein with MIF4G domain 1                                                   | 2.88 | 1.40 | 0.04 |
| A_52_P138895 | NM_153559 | Qsox2          | 227638 | quiescin Q6 sulfhydryl oxidase 2                                                        | 2.72 | 1.40 | 0.07 |
| A_51_P242608 | NM_175560 | Zfp747         | 269997 | zinc finger protein 747                                                                 | 2.72 | 1.40 | 0.07 |
| A_51_P299934 | NM_173022 | BC048403       | 270802 | cDNA sequence BC048403                                                                  | 2.83 | 1.40 | 0.05 |
| A_51_P288026 | NM_173400 | Haus6          | 230376 | HAUS augmin-like complex, subunit 6                                                     | 3.04 | 1.39 | 0.03 |
| A_52_P201867 | AK040185  | Lpp            | 210126 | LIM domain containing preferred translocation partner in lipoma                         | 3.18 | 1.39 | 0.02 |
| A_52_P591791 | NA        | NA             | NA     | NA                                                                                      | 3.05 | 1.39 | 0.02 |
| A_52_P422885 | NA        | NA             | NA     | NA                                                                                      | 3.04 | 1.39 | 0.02 |
| A_52_P18665  | NM_025772 | Dtnbp1         | 94245  | dystrobrevin binding protein 1                                                          | 2.90 | 1.39 | 0.04 |
| A_51_P324640 | AK021208  | C330018D277422 |        | RIKEN cDNA C330018D20 gene                                                              | 3.50 | 1.39 | 0.01 |
| A_52_P519508 | NM_013636 | Ppp1cc         | 19047  | protein phosphatase 1, catalytic subunit, gamma isoform                                 | 3.00 | 1.39 | 0.03 |
| A_51_P102421 | NM_019952 | Clcf1          | 56708  | cardiotrophin-like cytokine factor 1                                                    | 3.15 | 1.39 | 0.02 |

|               |           |          |        |                                                                               |      |      |      |
|---------------|-----------|----------|--------|-------------------------------------------------------------------------------|------|------|------|
| A_52_P148798  | NA        | NA       | NA     | NA                                                                            | 2.83 | 1.39 | 0.05 |
| A_51_P176185  | NM_153569 | Gak      | 231580 | cyclin G associated kinase                                                    | 3.21 | 1.39 | 0.02 |
| A_51_P332003  | NM_025651 | Aste1    | 66595  | asteroid homolog 1 (Drosophila)                                               | 2.97 | 1.39 | 0.03 |
| A_52_P604618  | BC029156  | Sbf1     | 77980  | SET binding factor 1                                                          | 3.27 | 1.38 | 0.01 |
| A_52_P505501  | NM_026746 | Nsmce2   | 68501  | non-SMC element 2 homolog (MMS21, <i>S. cerevisiae</i> )                      | 3.25 | 1.38 | 0.01 |
| A_51_P363714  | NM_016786 | Ube2k    | 53323  | ubiquitin-conjugating enzyme E2K (UBC1 homolog, yeast)                        | 3.23 | 1.38 | 0.01 |
| A_52_P16166   | NM_027830 | Mcm9     | 71567  | minichromosome maintenance complex component 9                                | 2.75 | 1.38 | 0.06 |
| A_52_P350306  | XM_001005 | Gm11472  | 668950 | predicted gene 11472                                                          | 2.72 | 1.38 | 0.07 |
| A_52_P104107  | NM_011755 | Zfp35    | 22694  | zinc finger protein 35                                                        | 3.03 | 1.38 | 0.03 |
| A_52_P683315  | NM_134089 | Scrib    | 105782 | scribbled homolog (Drosophila)                                                | 3.09 | 1.38 | 0.02 |
| A_52_P469512  | NM_026000 | Psmd9    | 67151  | proteasome (prosome, macropain) 26S subunit, non-ATPase, 9                    | 2.72 | 1.37 | 0.07 |
| A_51_P397564  | NM_025645 | Snrnp40  | 66585  | small nuclear ribonucleoprotein 40 (U5)                                       | 2.89 | 1.37 | 0.04 |
| A_51_P341978  | NM_011666 | Uba3     | 22200  | ubiquitin-like modifier activating enzyme 3                                   | 2.99 | 1.36 | 0.03 |
| A_51_P310100  | AK029149  | Rnaset2b | 68195  | ribonuclease T2B                                                              | 2.79 | 1.36 | 0.05 |
| A_52_P116006  | NM_010266 | Gda      | 14544  | guanine deaminase                                                             | 2.74 | 1.36 | 0.07 |
| A_51_P396708  | NM_025315 | Med21    | 108098 | mediator complex subunit 21                                                   | 2.76 | 1.36 | 0.06 |
| A_52_P677092  | XM_358384 | NA       | NA     | NA                                                                            | 2.91 | 1.36 | 0.04 |
| A_52_P486063  | AK028313  | Slc25a3  | 18674  | solute carrier family 25 (mitochondrial carrier, phosphate carrier), member 3 | 2.78 | 1.35 | 0.05 |
| A_51_P404110  | NM_001077 | Fmn1     | 57778  | formin-like 1                                                                 | 2.74 | 1.35 | 0.07 |
| A_51_P442118  | NM_001039 | Gm6583   | 625424 | predicted gene 6583                                                           | 2.81 | 1.35 | 0.05 |
| A_51_P406306  | NM_172655 | Hecw2    | 329152 | HECT, C2 and WW domain containing E3 ubiquitin protein ligase 2               | 3.23 | 1.35 | 0.01 |
| A_52_P1188907 | AK089957  | NA       | NA     | NA                                                                            | 3.39 | 1.34 | 0.01 |
| A_51_P519648  | NM_153396 | Mical3   | 194401 | microtubule associated monooxygenase, calponin and LIM domain containing 3    | 3.52 | 1.34 | 0.01 |
| A_51_P295201  | NM_153567 | Slain2   | 75991  | SLAIN motif family, member 2                                                  | 2.78 | 1.34 | 0.05 |
| A_52_P479599  | NM_010438 | Hk1      | 15275  | hexokinase 1                                                                  | 2.73 | 1.33 | 0.07 |
| A_52_P433425  | NM_021421 | Angel2   | 52477  | angel homolog 2 (Drosophila)                                                  | 3.11 | 1.33 | 0.02 |
| A_51_P473907  | NM_008443 | Kif3a    | 16568  | kinesin family member 3A                                                      | 2.74 | 1.33 | 0.07 |

|               |           |            |        |                                                         |       |      |      |
|---------------|-----------|------------|--------|---------------------------------------------------------|-------|------|------|
| A_51_P291339  | NM_182990 | Ssrp1      | 20833  | structure specific recognition protein 1                | 2.90  | 1.32 | 0.04 |
|               |           |            |        | proteasome (prosome, macropain) 26S subunit, ATPase     |       |      |      |
| A_52_P238044  | NM_008949 | Psmc3ip    | 19183  | 3, interacting protein                                  | 2.79  | 1.29 | 0.05 |
| A_52_P175086  | NM_130879 | Usp48      | 170707 | ubiquitin specific peptidase 48                         | -2.64 | 0.84 | 0.06 |
| A_52_P216600  | NM_013514 | Epb4.9     | 13829  | erythrocyte protein band 4.9                            | -2.70 | 0.80 | 0.05 |
| A_52_P221630  | NA        | NA         | NA     | NA                                                      | -2.61 | 0.80 | 0.07 |
| A_51_P231482  | AK019524  | Igsf3      | 78908  | immunoglobulin superfamily, member 3                    | -2.65 | 0.80 | 0.06 |
| A_51_P406414  | NM_010470 | Hp1bp3     | 15441  | heterochromatin protein 1, binding protein 3            | -3.03 | 0.79 | 0.02 |
| A_52_P422162  | AK078280  | Armc8      | 74125  | armadillo repeat containing 8                           | -2.69 | 0.79 | 0.05 |
|               |           |            |        | NADH dehydrogenase (ubiquinone) 1 alpha subcomplex,     |       |      |      |
| A_52_P347591  | NM_023202 | Ndufa7     | 66416  | 7 (B14.5a)                                              | -2.83 | 0.78 | 0.04 |
| A_51_P355375  | NM_021523 | Huwe1      | 59026  | HECT, UBA and WWE domain containing 1                   | -2.62 | 0.78 | 0.07 |
| A_51_P399896  | NM_010768 | Matk       | 17179  | megakaryocyte-associated tyrosine kinase                | -3.00 | 0.77 | 0.02 |
|               |           |            |        | solute carrier family 24 (sodium/potassium/calcium      |       |      |      |
| A_51_P268496  | NM_053195 | Slc24a3    | 94249  | exchanger), member 3                                    | -2.91 | 0.77 | 0.03 |
| A_52_P342039  | BC022177  | 1700025G04 | 69399  | RIKEN cDNA 1700025G04 gene                              | -2.76 | 0.77 | 0.05 |
| A_52_P145878  | AK164650  | 5530601H04 | 71445  | RIKEN cDNA 5530601H04 gene                              | -2.65 | 0.77 | 0.06 |
| A_51_P294445  | NM_019396 | Cyhr1      | 54151  | cysteine and histidine rich 1                           | -2.68 | 0.76 | 0.05 |
|               |           |            |        | guanine nucleotide binding protein, alpha q polypeptide |       |      |      |
| A_52_P668123  | NM_008139 | Gnaq       | 14682  |                                                         | -2.67 | 0.76 | 0.05 |
| A_51_P274947  | NM_026487 | Atad1      | 67979  | ATPase family, AAA domain containing 1                  | -3.87 | 0.76 | 0.00 |
| A_52_P652859  | NM_008481 | Lama2      | 16773  | laminin, alpha 2                                        | -2.63 | 0.76 | 0.07 |
|               |           |            |        | phosphatidylinositol-specific phospholipase C, X domain |       |      |      |
| A_51_P322658  | NM_207279 | Plcxd1     | 403178 | containing 1                                            | -2.61 | 0.76 | 0.07 |
| A_51_P232384  | NM_145566 | Agfg2      | 231801 | ArfGAP with FG repeats 2                                | -2.89 | 0.76 | 0.03 |
|               |           |            |        | a disintegrin and metallopeptidase domain 25 (testase   |       |      |      |
| A_51_P257892  | NM_011781 | Adam25     | 23793  | 2)                                                      | -4.16 | 0.76 | 0.00 |
| A_51_P235994  | NM_172882 | Wdfy3      | 72145  | WD repeat and FYVE domain containing 3                  | -3.01 | 0.76 | 0.02 |
| A_51_P430563  | NM_008098 | Mtpn       | 14489  | myotrophin                                              | -2.84 | 0.76 | 0.03 |
| A_52_P102248  | XM_620516 | Mex3b      | 108797 | mex3 homolog B (C. elegans)                             | -2.84 | 0.76 | 0.03 |
| A_52_P446011  | AK044502  | Etnk1      | 75320  | ethanolamine kinase 1                                   | -2.77 | 0.75 | 0.04 |
| A_52_P1128347 | BC059894  | Syn3       | 27204  | synapsin III                                            | -2.70 | 0.75 | 0.05 |
| A_51_P171136  | AK006257  | 1700023A16 | 9371   | RIKEN cDNA 1700023A16 gene                              | -2.88 | 0.75 | 0.03 |



|               |           |            |        |                                                                                                |       |      |      |
|---------------|-----------|------------|--------|------------------------------------------------------------------------------------------------|-------|------|------|
| A_52_P362403  | NM_025274 | Dppa5a     | 434423 | developmental pluripotency associated 5A                                                       | -2.92 | 0.75 | 0.03 |
| A_51_P141123  | NM_009942 | Cox5b      | 12859  | cytochrome c oxidase, subunit Vb                                                               | -3.03 | 0.75 | 0.02 |
| A_51_P175069  | NM_172619 | Adamts10   | 224697 | a disintegrin-like and metallopeptidase (reprolysin type) with thrombospondin type 1 motif, 10 | -3.27 | 0.75 | 0.01 |
| A_52_P544555  | NM_024219 | Hsbp1      | 68196  | heat shock factor binding protein 1                                                            | -3.36 | 0.75 | 0.01 |
| A_52_P476877  | NM_001024 | Rfx4       | 71137  | regulatory factor X, 4 (influences HLA class II expression)                                    | -2.65 | 0.75 | 0.06 |
| A_51_P491635  | NM_027366 | Ly6g6e     | 70274  | lymphocyte antigen 6 complex, locus G6E                                                        | -3.05 | 0.75 | 0.02 |
| A_51_P318365  | NM_010513 | Igf1r      | 16001  | insulin-like growth factor I receptor                                                          | -2.97 | 0.75 | 0.02 |
| A_52_P1187714 | AK032928  | NA         | NA     | NA                                                                                             | -2.75 | 0.75 | 0.05 |
| A_52_P434038  | NM_030597 | Lsm2       | 27756  | LSM2 homolog, U6 small nuclear RNA associated ( <i>S. cerevisiae</i> )                         | -2.74 | 0.74 | 0.05 |
| A_52_P311392  | AK009443  | NA         | NA     | NA                                                                                             | -3.02 | 0.74 | 0.02 |
| A_51_P451409  | NM_177765 | Ttll13     | 269954 | tubulin tyrosine ligase-like family, member 13                                                 | -3.34 | 0.74 | 0.01 |
| A_52_P146043  | NM_009333 | Tcf7l2     | 21416  | transcription factor 7-like 2, T-cell specific, HMG-box                                        | -3.09 | 0.74 | 0.02 |
| A_52_P8863    | AK031889  | NA         | NA     | NA                                                                                             | -2.89 | 0.74 | 0.03 |
| A_52_P69756   | NM_178051 | Mterfd2    | 69821  | MTERF domain containing 2                                                                      | -2.91 | 0.74 | 0.03 |
| A_52_P156765  | NM_027641 | Spf1       | 70997  | sperm flagellar 1                                                                              | -3.07 | 0.74 | 0.02 |
| A_52_P121960  | NA        | NA         | NA     | NA                                                                                             | -2.85 | 0.74 | 0.03 |
| A_51_P176231  | AK051663  | Stox2      | 71069  | storkhead box 2                                                                                | -2.70 | 0.74 | 0.05 |
| A_51_P452153  | NM_027222 | 2010001M09 | 69816  | RIKEN cDNA 2010001M09 gene                                                                     | -2.97 | 0.74 | 0.02 |
| A_51_P405304  | NM_053172 | Mepe       | 94111  | matrix extracellular phosphoglycoprotein with ASARM motif (bone)                               | -2.74 | 0.74 | 0.05 |
| A_51_P519276  | NM_025843 | Ndufb7     | 66916  | NADH dehydrogenase (ubiquinone) 1 beta subcomplex, 7                                           | -3.23 | 0.74 | 0.01 |
| A_51_P366227  | NM_177359 | Zfp799     | 240064 | zinc finger protein 799                                                                        | -3.19 | 0.74 | 0.01 |
| A_52_P672825  | BC106120  | Rad9b      | 231724 | RAD9 homolog B ( <i>S. cerevisiae</i> )                                                        | -2.88 | 0.74 | 0.03 |
| A_52_P12590   | NM_033478 | Ly6g6d     | 114654 | lymphocyte antigen 6 complex, locus G6D                                                        | -2.78 | 0.74 | 0.04 |
| A_51_P199041  | NM_001012 | Adcy5      | 224129 | adenylate cyclase 5                                                                            | -2.65 | 0.73 | 0.06 |
| A_52_P23576   | AK030792  | Ccdc148    | 227933 | coiled-coil domain containing 148                                                              | -3.42 | 0.73 | 0.01 |
| A_52_P533792  | NM_011506 | Sucla2     | 20916  | succinate-Coenzyme A ligase, ADP-forming, beta subunit                                         | -2.79 | 0.73 | 0.04 |

|              |           |           |        |                                                    |       |      |      |
|--------------|-----------|-----------|--------|----------------------------------------------------|-------|------|------|
| A_52_P528726 | NM_007750 | Cox8a     | 12868  | cytochrome c oxidase, subunit VIIIa                | -2.76 | 0.73 | 0.04 |
| A_52_P964651 | AK158217  | Fam65c    | 69553  | family with sequence similarity 65, member C       | -2.65 | 0.73 | 0.06 |
| A_52_P549815 | XM_621314 | Dsp       | 109620 | desmoplakin                                        | -2.97 | 0.73 | 0.02 |
| A_51_P337269 | NM_144903 | Aldob     | 230163 | aldolase B, fructose-bisphosphate                  | -2.73 | 0.73 | 0.05 |
| A_51_P187625 | NM_013878 | Cabp2     | 29866  | calcium binding protein 2                          | -2.65 | 0.73 | 0.06 |
| A_52_P75034  | NM_001004 | 9930012K1 | 268759 | RIKEN cDNA 9930012K11 gene                         | -2.82 | 0.73 | 0.04 |
| A_51_P110371 | NM_019573 | Wwox      | 80707  | WW domain-containing oxidoreductase                | -2.69 | 0.73 | 0.05 |
| A_51_P459091 | NM_172550 | A130042E2 | 216119 | RIKEN cDNA A130042E20 gene                         | -2.81 | 0.73 | 0.04 |
| A_51_P415870 | NA        | NA        | NA     | NA                                                 | -2.93 | 0.73 | 0.03 |
| A_51_P109828 | NM_025407 | Uqcrc1    | 22273  | ubiquinol-cytochrome c reductase core protein 1    | -3.03 | 0.73 | 0.02 |
| A_51_P148717 | NM_175431 | A830093I2 | 207921 | RIKEN cDNA A830093I24 gene                         | -2.60 | 0.73 | 0.07 |
| A_52_P979926 | AK050149  | NA        | NA     | NA                                                 | -3.01 | 0.73 | 0.02 |
| A_52_P122234 | BC049759  | Myeov2    | 66915  | myeloma overexpressed 2                            | -2.66 | 0.73 | 0.05 |
| A_52_P649064 | NA        | NA        | NA     | NA                                                 | -2.78 | 0.73 | 0.04 |
| A_52_P82247  | NM_007808 | Cycs      | 13063  | cytochrome c, somatic                              | -2.67 | 0.73 | 0.05 |
| A_52_P393120 | NM_001076 | 1810012P1 | 66274  | RIKEN cDNA 1810012P15 gene                         | -2.89 | 0.73 | 0.03 |
| A_52_P308669 | NM_030703 | Cpn1      | 93721  | carboxypeptidase N, polypeptide 1                  | -2.83 | 0.73 | 0.04 |
| A_51_P483311 | NM_183170 | Mpv17l2   | 234384 | MPV17 mitochondrial membrane protein-like 2        | -2.63 | 0.73 | 0.07 |
| A_51_P201390 | XM_619279 | NA        | NA     | NA                                                 | -2.93 | 0.73 | 0.02 |
| A_52_P339011 | NM_021360 | Neurl1a   | 18011  | neuralized homolog 1A (Drosophila)                 | -3.07 | 0.73 | 0.02 |
| A_51_P427444 | NM_017472 | Snx3      | 54198  | sorting nexin 3                                    | -2.62 | 0.73 | 0.07 |
| A_52_P348837 | NM_172414 | Fam164c   | 72350  | family with sequence similarity 164, member C      | -2.65 | 0.73 | 0.06 |
| A_51_P128336 | NM_172588 | Serinc5   | 218442 | serine incorporator 5                              | -2.83 | 0.73 | 0.04 |
| A_52_P198780 | NM_023873 | Cep70     | 68121  | centrosomal protein 70                             | -3.86 | 0.73 | 0.00 |
| A_51_P141836 | NM_133907 | Ube3c     | 100763 | ubiquitin protein ligase E3C                       | -2.77 | 0.73 | 0.04 |
| A_51_P230267 | NM_010391 | H2-Q10    | 15007  | histocompatibility 2, Q region locus 10            | -2.81 | 0.72 | 0.04 |
| A_51_P320304 | NM_011122 | Plod1     | 18822  | procollagen-lysine, 2-oxoglutarate 5-dioxygenase 1 | -2.62 | 0.72 | 0.07 |
| A_52_P389347 | NM_023348 | Snap29    | 67474  | synaptosomal-associated protein 29                 | -2.61 | 0.72 | 0.07 |
| A_51_P408749 | AK169756  | 4933439C1 | 74476  | RIKEN cDNA 4933439C10 gene                         | -2.71 | 0.72 | 0.05 |
| A_51_P393958 | NM_025995 | Fbxo5     | 67141  | F-box protein 5                                    | -2.70 | 0.72 | 0.05 |
| A_51_P127195 | NM_013538 | Cdca3     | 14793  | cell division cycle associated 3                   | -2.63 | 0.72 | 0.07 |
| A_52_P661587 | NM_001025 | 2610301F0 | 545428 | RIKEN cDNA 2610301F02 gene                         | -2.63 | 0.72 | 0.07 |
| A_51_P392967 | NM_053253 | Zmynd10   | 114602 | zinc finger, MYND domain containing 10             | -2.64 | 0.72 | 0.07 |

|              |           |           |        |                                                                                                               |       |      |      |
|--------------|-----------|-----------|--------|---------------------------------------------------------------------------------------------------------------|-------|------|------|
| A_51_P439426 | NM_133360 | Acaca     | 107476 | acetyl-Coenzyme A carboxylase alpha                                                                           | -2.90 | 0.72 | 0.03 |
| A_52_P257547 | NM_024179 | 0610009O2 | 66839  | RIKEN cDNA 0610009O20 gene                                                                                    | -2.78 | 0.72 | 0.04 |
| A_52_P390918 | NM_019797 | Trip4     | 56404  | thyroid hormone receptor interactor 4                                                                         | -2.90 | 0.72 | 0.03 |
| A_51_P431316 | NM_025773 | Ube2w     | 66799  | ubiquitin-conjugating enzyme E2W (putative)                                                                   | -2.99 | 0.72 | 0.02 |
| A_51_P488718 | NM_026846 | Zfand2b   | 68818  | zinc finger, AN1 type domain 2B                                                                               | -3.14 | 0.72 | 0.01 |
| A_51_P277683 | M62541    | Ms4a1     | 12482  | membrane-spanning 4-domains, subfamily A, member 1<br>solute carrier family 5 (sodium/glucose cotransporter), | -3.56 | 0.72 | 0.01 |
| A_52_P271085 | NM_146198 | Slc5a11   | 233836 | member 11                                                                                                     | -3.09 | 0.72 | 0.02 |
| A_52_P322467 | AK032189  | Nit1      | 27045  | nitrilase 1                                                                                                   | -2.88 | 0.72 | 0.03 |
| A_52_P374681 | NM_177394 | A730011L0 | 338371 | RIKEN cDNA A730011L01 gene                                                                                    | -2.80 | 0.72 | 0.04 |
| A_52_P602188 | NM_172463 | Sned1     | 208777 | sushi, nidogen and EGF-like domains 1                                                                         | -2.89 | 0.72 | 0.03 |
| A_51_P303397 | NM_008820 | Pepd      | 18624  | peptidase D<br>DCN1, defective in cullin neddylation 1, domain                                                | -2.71 | 0.72 | 0.05 |
| A_52_P414420 | NM_033623 | Dcun1d1   | 114893 | containing 1 ( <i>S. cerevisiae</i> )                                                                         | -2.68 | 0.72 | 0.05 |
| A_52_P250883 | NA        | NA        | NA     | NA                                                                                                            | -2.65 | 0.72 | 0.06 |
| A_51_P356536 | AK020330  | 9230110I0 | 77698  | RIKEN cDNA 9230110I02 gene                                                                                    | -3.48 | 0.72 | 0.01 |
| A_52_P82488  | NM_021476 | Cysltr1   | 58861  | cysteinyl leukotriene receptor 1                                                                              | -3.53 | 0.72 | 0.01 |
| A_51_P176625 | BC026442  | Zbtb8os   | 67106  | zinc finger and BTB domain containing 8 opposite strand                                                       | -2.60 | 0.72 | 0.07 |
| A_52_P685828 | NM_010888 | Ndufs6    | 407785 | NADH dehydrogenase (ubiquinone) Fe-S protein 6<br>Williams-Beuren syndrome chromosome region 28               | -2.82 | 0.72 | 0.04 |
| A_51_P517321 | NM_194065 | Wbscr28   | 76629  | (human)                                                                                                       | -2.79 | 0.72 | 0.04 |
| A_52_P538709 | NM_133932 | Tada3     | 101206 | transcriptional adaptor 3                                                                                     | -2.87 | 0.72 | 0.03 |
| A_51_P224630 | NM_026854 | Dtwd2     | 68857  | DTW domain containing 2<br>membrane bound O-acyltransferase domain containing                                 | -2.78 | 0.72 | 0.04 |
| A_51_P144868 | NM_029934 | Mboat7    | 77582  | 7                                                                                                             | -2.94 | 0.71 | 0.02 |
| A_52_P549418 | NM_011505 | Stxbp4    | 20913  | syntaxin binding protein 4                                                                                    | -3.12 | 0.71 | 0.01 |
| A_51_P452861 | AK147511  | 1810043G0 | 67884  | RIKEN cDNA 1810043G02 gene                                                                                    | -3.28 | 0.71 | 0.01 |
| A_52_P441044 | AK087489  | Rfxap     | 170767 | regulatory factor X-associated protein                                                                        | -2.93 | 0.71 | 0.02 |
| A_51_P513979 | NM_027283 | 1700026L0 | 69987  | RIKEN cDNA 1700026L06 gene<br>solute carrier family 35 (CMP-sialic acid transporter),                         | -3.20 | 0.71 | 0.01 |
| A_51_P514421 | NM_011895 | Slc35a1   | 24060  | member 1                                                                                                      | -2.95 | 0.71 | 0.02 |

|               |           |            |        |                                                                                                                |       |      |      |
|---------------|-----------|------------|--------|----------------------------------------------------------------------------------------------------------------|-------|------|------|
| A_52_P325265  | NM_026742 | Ndufaf4    | 68493  | NADH dehydrogenase (ubiquinone) 1 alpha subcomplex, assembly factor 4                                          | -3.38 | 0.71 | 0.01 |
| A_52_P74524   | NM_175239 | NA         | NA     | NA                                                                                                             | -2.74 | 0.71 | 0.05 |
| A_52_P578768  | NM_178746 | Slc38a9    | 268706 | solute carrier family 38, member 9                                                                             | -2.71 | 0.71 | 0.05 |
| A_51_P353856  | NM_026861 | Ubac2      | 68889  | ubiquitin associated domain containing 2                                                                       | -2.67 | 0.71 | 0.05 |
| A_52_P510062  | AK038230  | NA         | NA     | NA                                                                                                             | -3.32 | 0.71 | 0.01 |
| A_51_P160664  | NM_025379 | Cox7b      | 66142  | cytochrome c oxidase subunit VIIb                                                                              | -2.85 | 0.71 | 0.03 |
| A_52_P1012802 | NM_008982 | Ptprj      | 19271  | protein tyrosine phosphatase, receptor type, J                                                                 | -2.69 | 0.71 | 0.05 |
| A_51_P403334  | NM_024192 | Cuedc2     | 67116  | CUE domain containing 2                                                                                        | -2.68 | 0.71 | 0.05 |
| A_51_P229732  | AK015605  | 4930481B07 | 74937  | RIKEN cDNA 4930481B07 gene                                                                                     | -2.97 | 0.71 | 0.02 |
| A_51_P290191  | NM_008243 | Mst1       | 15235  | macrophage stimulating 1 (hepatocyte growth factor-like)                                                       | -2.96 | 0.71 | 0.02 |
| A_51_P341285  | NM_018888 | Uqcc       | 56046  | ubiquinol-cytochrome c reductase complex chaperone, CBP3 homolog (yeast)                                       | -2.72 | 0.71 | 0.05 |
| A_52_P145861  | NM_019388 | Cd86       | 12524  | CD86 antigen                                                                                                   | -2.70 | 0.71 | 0.05 |
| A_51_P224257  | NM_021505 | Anapc5     | 59008  | anaphase-promoting complex subunit 5                                                                           | -2.99 | 0.71 | 0.02 |
| A_51_P407606  | NM_028355 | Tmem48     | 72787  | transmembrane protein 48                                                                                       | -3.08 | 0.71 | 0.02 |
| A_52_P435042  | NM_145143 | Mpp4       | 227157 | membrane protein, palmitoylated 4 (MAGUK p55 subfamily member 4)                                               | -2.86 | 0.71 | 0.03 |
| A_51_P353056  | NM_183221 | Fat4       | 329628 | FAT tumor suppressor homolog 4 (Drosophila)                                                                    | -2.64 | 0.71 | 0.06 |
| A_52_P348031  | NM_021889 | Syt9       | 60510  | synaptotagmin IX                                                                                               | -3.07 | 0.71 | 0.02 |
| A_52_P408459  | AK088955  | Spopl      | 76857  | speckle-type POZ protein-like                                                                                  | -2.61 | 0.71 | 0.07 |
| A_51_P412846  | NM_028889 | Efhd1      | 98363  | EF hand domain containing 1                                                                                    | -3.37 | 0.71 | 0.01 |
| A_52_P51078   | NM_007801 | Ctsh       | 13036  | cathepsin H                                                                                                    | -3.73 | 0.71 | 0.00 |
| A_51_P365139  | AK014911  | Micalcl    | 70877  | MICAL C-terminal like                                                                                          | -2.78 | 0.71 | 0.04 |
| A_51_P408881  | NM_019808 | Pdlim5     | 56376  | PDZ and LIM domain 5                                                                                           | -2.67 | 0.71 | 0.05 |
| A_52_P297050  | NM_023876 | Elp4       | 77766  | elongation protein 4 homolog (S. cerevisiae)                                                                   | -2.97 | 0.71 | 0.02 |
| A_51_P404275  | NM_007410 | Adh5       | 11532  | alcohol dehydrogenase 5 (class III), chi polypeptide leucine zipper-EF-hand containing transmembrane protein 2 | -2.75 | 0.71 | 0.05 |
| A_51_P149960  | NM_173012 | Letm2      | 270035 | prune homolog 2 (Drosophila)                                                                                   | -2.99 | 0.71 | 0.02 |
| A_51_P326932  | AK018172  | Prune2     | 353211 | prune homolog 2 (Drosophila)                                                                                   | -3.57 | 0.71 | 0.01 |
| A_51_P261991  | NM_007540 | Bdnf       | 12064  | brain derived neurotrophic factor                                                                              | -2.81 | 0.71 | 0.04 |
| A_52_P371705  | NM_027351 | Ppil3      | 70225  | peptidylprolyl isomerase (cyclophilin)-like 3                                                                  | -3.03 | 0.70 | 0.02 |

|               |           |           |        |                                                                                       |       |      |      |
|---------------|-----------|-----------|--------|---------------------------------------------------------------------------------------|-------|------|------|
| A_51_P480073  | NM_007689 | Chad      | 12643  | chondroadherin                                                                        | -2.71 | 0.70 | 0.05 |
| A_52_P1011730 | AK038827  | A230066D( | 380656 | RIKEN cDNA A230066D03 gene                                                            | -3.68 | 0.70 | 0.00 |
| A_52_P307447  | NM_023290 | Mkrn2     | 67027  | makorin, ring finger protein, 2                                                       | -4.26 | 0.70 | 0.00 |
| A_51_P221641  | NM_026091 | 1700037HC | 67326  | RIKEN cDNA 1700037H04 gene                                                            | -3.16 | 0.70 | 0.01 |
| A_52_P84447   | NM_029832 | Ddrgek1   | 77006  | DDRKG domain containing 1                                                             | -3.81 | 0.70 | 0.00 |
| A_51_P462533  | AK028004  | Syt7      | 54525  | synaptotagmin VII                                                                     | -2.66 | 0.70 | 0.06 |
| A_51_P134533  | NM_026416 | S100a16   | 67860  | S100 calcium binding protein A16                                                      | -2.79 | 0.70 | 0.04 |
| A_51_P135322  | NM_019478 | Pqbp1     | 54633  | polyglutamine binding protein 1                                                       | -2.62 | 0.70 | 0.07 |
| A_51_P291936  | NM_008060 | Ganab     | 14376  | alpha glucosidase 2 alpha neutral subunit                                             | -2.71 | 0.70 | 0.05 |
| A_52_P479539  | AK047894  | Cit       | 12704  | citron                                                                                | -3.00 | 0.70 | 0.02 |
| A_51_P364339  | NM_133666 | Ndufv1    | 17995  | NADH dehydrogenase (ubiquinone) flavoprotein 1                                        | -3.53 | 0.70 | 0.01 |
| A_52_P79506   | NM_001024 | Zfp667    | 384763 | zinc finger protein 667                                                               | -3.07 | 0.70 | 0.02 |
| A_52_P5454    | NM_054042 | Cd248     | 70445  | CD248 antigen, endosialin                                                             | -2.70 | 0.70 | 0.05 |
| A_52_P170754  | NM_146045 | B4galt7   | 218271 | xylosylprotein beta1,4-galactosyltransferase, polypeptide 7 (galactosyltransferase I) | -2.68 | 0.70 | 0.05 |
| A_51_P335077  | NM_010888 | Ndufs6    | 407785 | NADH dehydrogenase (ubiquinone) Fe-S protein 6                                        | -2.99 | 0.70 | 0.02 |
| A_51_P249274  | NM_027918 | 1300017J0 | 71775  | RIKEN cDNA 1300017J02 gene                                                            | -2.78 | 0.70 | 0.04 |
| A_51_P214837  | NM_001039 | Arhgap12  | 75415  | Rho GTPase activating protein 12                                                      | -3.00 | 0.70 | 0.02 |
| A_52_P151905  | XM_285588 | Gm5132    | 333452 | predicted gene 5132                                                                   | -4.01 | 0.70 | 0.00 |
| A_51_P331462  | NM_026832 | Cgrrf1    | 68755  | cell growth regulator with ring finger domain 1                                       | -3.56 | 0.70 | 0.01 |
| A_51_P128287  | NM_027360 | 2010107E0 | 70257  | RIKEN cDNA 2010107E04 gene                                                            | -2.72 | 0.70 | 0.05 |
| A_52_P558699  | NM_211355 | Smek1     | 68734  | SMEK homolog 1, suppressor of mek1 (Dictyostelium)                                    | -2.88 | 0.70 | 0.03 |
| A_51_P333850  | NM_001003 | Senp7     | 66315  | SUMO1/sentrin specific peptidase 7                                                    | -3.43 | 0.70 | 0.01 |
| A_51_P473272  | NM_019656 | Tspan6    | 56496  | tetraspanin 6                                                                         | -3.24 | 0.70 | 0.01 |
| A_52_P462239  | AK084087  | D130020G  | 320972 | RIKEN cDNA D130020G16 gene                                                            | -3.15 | 0.70 | 0.01 |
| A_52_P282186  | AK173104  | Slc45a4   | 106068 | solute carrier family 45, member 4                                                    | -4.24 | 0.70 | 0.00 |
| A_52_P170945  | NM_146178 | Ccdc106   | 232821 | coiled-coil domain containing 106                                                     | -2.67 | 0.70 | 0.05 |
| A_52_P663757  | BC050866  | Tnik      | 665113 | TRAF2 and NCK interacting kinase                                                      | -3.26 | 0.70 | 0.01 |
| A_51_P408082  | NM_009692 | Apoa1     | 11806  | apolipoprotein A-I                                                                    | -2.94 | 0.70 | 0.02 |
| A_51_P382805  | NM_027061 | Zpbp2     | 69376  | zona pellucida binding protein 2                                                      | -3.03 | 0.70 | 0.02 |
| A_52_P111244  | NA        | NA        | NA     | NA                                                                                    | -2.73 | 0.70 | 0.05 |

|              |           |           |        |                                                                 |       |      |      |
|--------------|-----------|-----------|--------|-----------------------------------------------------------------|-------|------|------|
|              |           |           |        | membrane bound O-acyltransferase domain containing              |       |      |      |
| A_52_P676390 | NM_029934 | Mboat7    | 77582  | 7                                                               | -2.89 | 0.70 | 0.03 |
| A_52_P88091  | NM_007883 | Dsg2      | 13511  | desmoglein 2                                                    | -3.46 | 0.70 | 0.01 |
| A_52_P141404 | NM_144814 | Rcor3     | 214742 | REST corepressor 3                                              | -2.87 | 0.70 | 0.03 |
| A_51_P506915 | NM_019762 | Pkp3      | 56460  | plakophilin 3                                                   | -2.90 | 0.70 | 0.03 |
| A_52_P652999 | NM_178362 | Sorbs1    | 20411  | sorbin and SH3 domain containing 1                              | -2.68 | 0.70 | 0.05 |
|              |           |           |        | ATP synthase, H <sup>+</sup> transporting, mitochondrial F0     |       |      |      |
| A_52_P106929 | BC049640  | Atp5f1    | 11950  | complex, subunit b, isoform 1                                   | -2.79 | 0.70 | 0.04 |
| A_52_P554382 | X61497    | NA        | NA     | NA                                                              | -3.31 | 0.70 | 0.01 |
| A_52_P384079 | AK029069  | Rnf139    | 75841  | ring finger protein 139                                         | -2.85 | 0.69 | 0.03 |
| A_52_P378452 | AK170049  | Tex261    | 21766  | testis expressed gene 261                                       | -2.72 | 0.69 | 0.05 |
| A_51_P111380 | AF223568  | NA        | NA     | NA                                                              | -2.81 | 0.69 | 0.04 |
| A_52_P127682 | AK147384  | Dagla     | 269060 | diacylglycerol lipase, alpha                                    | -2.74 | 0.69 | 0.05 |
| A_51_P427964 | XM_149772 | NA        | NA     | NA                                                              | -3.33 | 0.69 | 0.01 |
| A_52_P182659 | NM_026444 | Cs        | 12974  | citrate synthase                                                | -2.75 | 0.69 | 0.05 |
| A_52_P575874 | AK163649  | Yme11     | 27377  | YME1-like 1 ( <i>S. cerevisiae</i> )                            | -3.60 | 0.69 | 0.01 |
| A_52_P488437 | NM_013738 | Plek2     | 27260  | pleckstrin 2                                                    | -3.95 | 0.69 | 0.00 |
| A_51_P431669 | NM_178113 | Ncapd3    | 78658  | non-SMC condensin II complex, subunit D3                        | -2.68 | 0.69 | 0.05 |
| A_52_P328492 | NM_001079 | Gas2l3    | 237436 | growth arrest-specific 2 like 3                                 | -3.45 | 0.69 | 0.01 |
| A_51_P413275 | XM_901585 | NA        | NA     | NA                                                              | -2.71 | 0.69 | 0.05 |
| A_52_P342860 | NM_007954 | Es1       | 13884  | esterase 1                                                      | -3.35 | 0.69 | 0.01 |
| A_51_P364391 | NM_175184 | Fam125b   | 72543  | family with sequence similarity 125, member B                   | -2.62 | 0.69 | 0.07 |
| A_51_P503696 | NM_001025 | D4Ertd22e | 213491 | DNA segment, Chr 4, ERATO Doi 22, expressed                     | -2.87 | 0.69 | 0.03 |
| A_52_P297276 | NM_177616 | Ccdc157   | 216516 | coiled-coil domain containing 157                               | -3.09 | 0.69 | 0.02 |
|              |           |           |        | nudix (nucleoside diphosphate linked moiety X)-type             |       |      |      |
| A_51_P141502 | AK017799  | Nudt21    | 68219  | motif 21                                                        | -2.96 | 0.69 | 0.02 |
| A_52_P676219 | NM_028258 | Dzip1l    | 72507  | DAZ interacting protein 1-like                                  | -2.90 | 0.69 | 0.03 |
|              |           |           |        |                                                                 |       |      |      |
| A_52_P632142 | NM_172910 | Dlgap2    | 244310 | discs, large ( <i>Drosophila</i> ) homolog-associated protein 2 | -2.73 | 0.69 | 0.05 |
| A_51_P363871 | NM_145486 | 2-Mar     | 224703 | membrane-associated ring finger (C3HC4) 2                       | -3.27 | 0.69 | 0.01 |
|              |           |           |        |                                                                 |       |      |      |
| A_52_P496202 | NM_013892 | Pcsk1n    | 30052  | proprotein convertase subtilisin/kexin type 1 inhibitor         | -2.71 | 0.69 | 0.05 |
| A_51_P281384 | NM_029734 | Wdyhv1    | 76773  | WDYHV motif containing 1                                        | -2.70 | 0.69 | 0.05 |
| A_51_P466270 | NM_010417 | Heph      | 15203  | hephaestin                                                      | -2.74 | 0.69 | 0.05 |

|              |           |            |        |                                                                      |       |      |      |
|--------------|-----------|------------|--------|----------------------------------------------------------------------|-------|------|------|
| A_52_P327791 | AK032600  | Cdadc1     | 71891  | cytidine and dCMP deaminase domain containing 1                      | -3.03 | 0.69 | 0.02 |
| A_51_P297993 | NA        | NA         | NA     | NA                                                                   | -2.96 | 0.69 | 0.02 |
| A_52_P223524 | NM_027081 | Fam116b    | 69440  | family with sequence similarity 116, member B                        | -3.87 | 0.69 | 0.00 |
| A_51_P176797 | NM_172397 | Limd2      | 67803  | LIM domain containing 2                                              | -3.26 | 0.69 | 0.01 |
| A_51_P160328 | NM_007624 | Cbx3       | 12417  | chromobox homolog 3 (Drosophila HP1 gamma)                           | -2.89 | 0.69 | 0.03 |
| A_51_P222386 | NM_134023 | Tbc1d10a   | 103724 | TBC1 domain family, member 10a                                       | -3.11 | 0.69 | 0.01 |
| A_51_P182693 | NM_008727 | Npr1       | 18160  | natriuretic peptide receptor 1                                       | -2.83 | 0.69 | 0.04 |
| A_52_P187217 | NM_172783 | Phka2      | 110094 | phosphorylase kinase alpha 2                                         | -2.70 | 0.69 | 0.05 |
| A_51_P353592 | NM_025417 | Commd4     | 66199  | COMM domain containing 4                                             | -3.09 | 0.69 | 0.02 |
| A_51_P256665 | NM_173006 | Pon3       | 269823 | paraoxonase 3                                                        | -3.14 | 0.69 | 0.01 |
| A_52_P98674  | NM_009771 | Btrc       | 12234  | beta-transducin repeat containing protein                            | -2.70 | 0.69 | 0.05 |
| A_52_P583563 | AK083630  | Tom11l1    | 71943  | target of myb1-like 1 (chicken)                                      | -3.20 | 0.69 | 0.01 |
| A_51_P361184 | NM_026612 | Ndufb2     | 68198  | NADH dehydrogenase (ubiquinone) 1 beta subcomplex, 2                 | -3.56 | 0.69 | 0.01 |
| A_51_P152802 | NM_030145 | Lsm6       | 78651  | LSM6 homolog, U6 small nuclear RNA associated (S. cerevisiae)        | -3.30 | 0.69 | 0.01 |
| A_51_P433769 | NM_144838 | Sgtb       | 218544 | small glutamine-rich tetratricopeptide repeat (TPR)-containing, beta | -2.91 | 0.68 | 0.03 |
| A_52_P390114 | NM_145625 | Eif4b      | 75705  | eukaryotic translation initiation factor 4B                          | -2.72 | 0.68 | 0.05 |
| A_51_P365138 | BC031386  | Micalcl    | 70877  | MICAL C-terminal like                                                | -4.33 | 0.68 | 0.00 |
| A_52_P92905  | NM_138309 | Cd99l2     | 171486 | CD99 antigen-like 2                                                  | -3.40 | 0.68 | 0.01 |
| A_52_P662226 | NM_173006 | Pon3       | 269823 | paraoxonase 3                                                        | -2.99 | 0.68 | 0.02 |
| A_52_P160896 | BC026950  | Kynu       | 70789  | kynureninase (L-kynurenine hydrolase)                                | -3.52 | 0.68 | 0.01 |
| A_51_P400107 | NM_011046 | Furin      | 18550  | furin (paired basic amino acid cleaving enzyme)                      | -2.62 | 0.68 | 0.07 |
| A_51_P213928 | NM_138742 | Nap1l3     | 54561  | nucleosome assembly protein 1-like 3                                 | -3.55 | 0.68 | 0.01 |
| A_51_P369516 | NM_025839 | Nudt16l1   | 66911  | nudix (nucleoside diphosphate linked moiety X)-type motif 16-like 1  | -2.66 | 0.68 | 0.06 |
| A_52_P923110 | AK031957  | 6330509M05 | 102913 | RIKEN cDNA 6330509M05 gene                                           | -2.74 | 0.68 | 0.05 |
| A_51_P483617 | NM_029554 | 0610040J01 | 76261  | RIKEN cDNA 0610040J01 gene                                           | -2.78 | 0.68 | 0.04 |
| A_51_P286431 | AK019053  | NA         | NA     | NA                                                                   | -2.77 | 0.68 | 0.04 |
| A_51_P423859 | NM_007601 | Capn3      | 12335  | calpain 3                                                            | -3.28 | 0.68 | 0.01 |
| A_52_P172619 | NM_053207 | Egln1      | 112405 | EGL nine homolog 1 (C. elegans)                                      | -2.63 | 0.68 | 0.07 |
| A_51_P304417 | NM_001003 | BC030307   | 103220 | cDNA sequence BC030307                                               | -2.84 | 0.68 | 0.03 |

|              |            |           |        |                                                                                  |       |      |      |
|--------------|------------|-----------|--------|----------------------------------------------------------------------------------|-------|------|------|
| A_51_P141610 | BC052789   | Cables2   | 252966 | CDK5 and Abl enzyme substrate 2                                                  | -2.66 | 0.68 | 0.06 |
| A_51_P245631 | NM_028713  | Rftn2     | 74013  | raftlin family member 2                                                          | -2.93 | 0.68 | 0.02 |
| A_52_P467140 | NM_019776  | Snd1      | 56463  | staphylococcal nuclease and tudor domain containing 1                            | -2.69 | 0.68 | 0.05 |
| A_52_P65610  | XM_486062  | NA        | NA     | NA                                                                               | -3.06 | 0.68 | 0.02 |
| A_52_P960434 | NA         | NA        | NA     | NA                                                                               | -2.78 | 0.68 | 0.04 |
| A_51_P152623 | NM_008552  | Mas1      | 17171  | MAS1 oncogene                                                                    | -2.64 | 0.68 | 0.06 |
| A_51_P330144 | NM_134126  | Ift140    | 106633 | intraflagellar transport 140 homolog (Chlamydomonas)                             | -2.85 | 0.68 | 0.03 |
| A_51_P411601 | NM_011931  | Rfwd2     | 26374  | ring finger and WD repeat domain 2                                               | -2.75 | 0.68 | 0.05 |
| A_52_P315328 | NA         | NA        | NA     | NA                                                                               | -2.88 | 0.68 | 0.03 |
| A_52_P105509 | NM_018830  | Asah2     | 54447  | N-acylsphingosine amidohydrolase 2                                               | -3.03 | 0.68 | 0.02 |
| A_52_P188215 | AK034089   | 3110047P2 | 319807 | RIKEN cDNA 3110047P20 gene                                                       | -3.36 | 0.68 | 0.01 |
| A_51_P174961 | NM_007972  | F10       | 14058  | coagulation factor X                                                             | -3.13 | 0.68 | 0.01 |
| A_52_P638798 | AK163490   | Mipol1    | 73490  | mirror-image polydactyly gene 1 homolog (human)                                  | -3.74 | 0.68 | 0.00 |
| A_52_P466147 | NM_027852  | Rarres2   | 71660  | retinoic acid receptor responder (tazarotene induced) 2                          | -3.20 | 0.68 | 0.01 |
| A_51_P338837 | NM_030695  | Lrba      | 80877  | LPS-responsive beige-like anchor                                                 | -2.76 | 0.68 | 0.05 |
| A_52_P640922 | AK220370   | Dcdc2a    | 195208 | doublecortin domain containing 2a                                                | -2.70 | 0.68 | 0.05 |
| A_51_P207636 | NM_016774  | Atp5b     | 11947  | ATP synthase, H <sup>+</sup> transporting mitochondrial F1 complex, beta subunit | -2.83 | 0.68 | 0.04 |
| A_51_P106428 | XM_133876  | Nsmce4a   | 67872  | non-SMC element 4 homolog A (S. cerevisiae)                                      | -2.61 | 0.68 | 0.07 |
| A_52_P380124 | NM_145851  | Cables2   | 252966 | CDK5 and Abl enzyme substrate 2                                                  | -3.15 | 0.68 | 0.01 |
| A_52_P336268 | NM_145427  | Atpaf2    | 246782 | ATP synthase mitochondrial F1 complex assembly factor 2                          | -2.74 | 0.68 | 0.05 |
| A_51_P479352 | NM_0010331 | Klhdc9    | 68874  | kelch domain containing 9                                                        | -3.77 | 0.68 | 0.00 |
| A_51_P339417 | NM_013905  | Heyl      | 56198  | hairy/enhancer-of-split related with YRPW motif-like                             | -3.33 | 0.68 | 0.01 |
| A_51_P247175 | AK147743   | Ints10    | 70885  | integrator complex subunit 10                                                    | -2.74 | 0.68 | 0.05 |
| A_51_P353386 | NM_153152  | 2410015M  | 224904 | RIKEN cDNA 2410015M20 gene                                                       | -3.27 | 0.68 | 0.01 |
| A_51_P494567 | NM_144885  | BC005624  | 227707 | cDNA sequence BC005624                                                           | -3.12 | 0.68 | 0.01 |
| A_52_P6828   | BC054851   | Xk        | 22439  | Kell blood group precursor (McLeod phenotype) homolog                            | -3.36 | 0.68 | 0.01 |



|              |           |           |        |                                                                               |       |      |      |
|--------------|-----------|-----------|--------|-------------------------------------------------------------------------------|-------|------|------|
| A_52_P554845 | NM_010433 | Hipk2     | 15258  | homeodomain interacting protein kinase 2                                      | -2.83 | 0.68 | 0.04 |
| A_52_P258266 | AK038230  | NA        | NA     | NA                                                                            | -3.78 | 0.68 | 0.00 |
| A_51_P118539 | AK012399  | 2700049AC | 76967  | RIKEN cDNA 2700049A03 gene                                                    | -2.70 | 0.68 | 0.05 |
| A_51_P224216 | NM_020582 | Atp5j2    | 57423  | ATP synthase, H+ transporting, mitochondrial F0 complex, subunit f, isoform 2 | -3.14 | 0.68 | 0.01 |
| A_52_P253317 | XM_980129 | NA        | NA     | NA                                                                            | -2.85 | 0.68 | 0.03 |
| A_51_P228452 | AK015009  | 4921537I1 | 70947  | RIKEN cDNA 4921537I17 gene                                                    | -3.16 | 0.68 | 0.01 |
| A_51_P468464 | NM_201352 | Gdpd5     | 233552 | glycerophosphodiester phosphodiesterase domain containing 5                   | -2.94 | 0.68 | 0.02 |
| A_52_P322412 | NM_178779 | Rnf152    | 320311 | ring finger protein 152                                                       | -3.67 | 0.68 | 0.00 |
| A_51_P256304 | NM_025500 | Mrpl37    | 56280  | mitochondrial ribosomal protein L37                                           | -2.77 | 0.67 | 0.04 |
| A_51_P236314 | AK004787  | Ndst1     | 15531  | N-deacetylase/N-sulfotransferase (heparan glucosaminy) 1                      | -3.60 | 0.67 | 0.01 |
| A_51_P145357 | NM_011354 | Serf2     | 378702 | small EDRK-rich factor 2                                                      | -2.98 | 0.67 | 0.02 |
| A_52_P522097 | NM_028320 | Adipor1   | 72674  | adiponectin receptor 1                                                        | -2.89 | 0.67 | 0.03 |
| A_52_P200359 | NM_080633 | Aco2      | 11429  | aconitase 2, mitochondrial                                                    | -2.70 | 0.67 | 0.05 |
| A_51_P302149 | NM_007688 | Cfl2      | 12632  | cofilin 2, muscle                                                             | -3.69 | 0.67 | 0.00 |
| A_52_P597371 | NM_134094 | Ncald     | 52589  | neurocalcin delta                                                             | -3.27 | 0.67 | 0.01 |
| A_52_P424840 | NM_008626 | Mrc2      | 17534  | mannose receptor, C type 2                                                    | -4.48 | 0.67 | 0.00 |
| A_51_P293575 | AK089462  | 4930402H2 | 228602 | RIKEN cDNA 4930402H24 gene                                                    | -3.39 | 0.67 | 0.01 |
| A_52_P306162 | NM_153399 | Syne1     | 64009  | synaptic nuclear envelope 1                                                   | -2.91 | 0.67 | 0.03 |
| A_51_P328432 | NA        | NA        | NA     | NA                                                                            | -3.22 | 0.67 | 0.01 |
| A_51_P349912 | NM_010230 | Fmn1      | 14260  | formin 1                                                                      | -2.85 | 0.67 | 0.03 |
| A_52_P527637 | NM_024414 | Stx1b     | 56216  | syntaxin 1B                                                                   | -3.22 | 0.67 | 0.01 |
| A_51_P289987 | NM_025604 | Psmg3     | 66506  | proteasome (prosome, macropain) assembly chaperone 3                          | -2.61 | 0.67 | 0.07 |
| A_51_P228883 | NM_016865 | Htatip2   | 53415  | HIV-1 tat interactive protein 2, homolog (human)                              | -2.61 | 0.67 | 0.07 |
| A_52_P392121 | NM_028763 | Cbx6      | 494448 | chromobox homolog 6                                                           | -2.99 | 0.67 | 0.02 |
| A_52_P88722  | NM_025483 | Senp7     | 66315  | SUMO1/sentrin specific peptidase 7                                            | -2.60 | 0.67 | 0.07 |
| A_51_P498403 | NM_028065 | Cnpy3     | 72029  | canopy 3 homolog (zebrafish)                                                  | -3.18 | 0.67 | 0.01 |
| A_51_P318966 | NM_009844 | Cd19      | 12478  | CD19 antigen                                                                  | -3.17 | 0.67 | 0.01 |
| A_51_P251736 | NM_007874 | Reep5     | 13476  | receptor accessory protein 5                                                  | -2.85 | 0.67 | 0.03 |
| A_51_P338878 | NM_027571 | P2ry12    | 70839  | purinergic receptor P2Y, G-protein coupled 12                                 | -4.16 | 0.67 | 0.00 |
| A_51_P164630 | NM_026808 | Fitm1     | 68680  | fat storage-inducing transmembrane protein 1                                  | -2.96 | 0.67 | 0.02 |

|              |           |                 |        |                                                                               |       |      |      |
|--------------|-----------|-----------------|--------|-------------------------------------------------------------------------------|-------|------|------|
| A_52_P147992 | AK038412  | Arglu1          | 234023 | arginine and glutamate rich 1                                                 | -3.60 | 0.67 | 0.01 |
| A_51_P386880 | NM_016737 | Stip1           | 20867  | stress-induced phosphoprotein 1                                               | -3.06 | 0.67 | 0.02 |
| A_51_P168945 | NM_016985 | Mtmr1           | 53332  | myotubularin related protein 1                                                | -2.79 | 0.67 | 0.04 |
| A_52_P679273 | AK036632  | 2310001H176432  |        | RIKEN cDNA 2310001H17 gene                                                    | -3.26 | 0.67 | 0.01 |
| A_52_P67958  | AK083707  | B230308N1320060 |        | RIKEN cDNA B230308N11 gene                                                    | -3.09 | 0.67 | 0.02 |
| A_51_P508394 | NM_146579 | Olf1032         | 258572 | olfactory receptor 1032                                                       | -2.89 | 0.67 | 0.03 |
|              |           |                 |        | budding uninhibited by benzimidazoles 3 homolog (S. cerevisiae)               |       |      |      |
| A_52_P110040 | NM_009774 | Bub3            | 12237  |                                                                               | -2.94 | 0.67 | 0.02 |
| A_52_P336977 | NM_029090 | Nat15           | 74763  | N-acetyltransferase 15 (GCN5-related, putative)                               | -3.83 | 0.67 | 0.00 |
| A_52_P375939 | AK029391  | Pex11c          | 69129  | peroxisomal biogenesis factor 11 gamma                                        | -2.63 | 0.67 | 0.07 |
| A_52_P307961 | NA        | NA              | NA     | NA                                                                            | -2.64 | 0.67 | 0.06 |
| A_51_P293489 | NM_139065 | Rbm47           | 245945 | RNA binding motif protein 47                                                  | -2.99 | 0.67 | 0.02 |
| A_51_P439846 | NM_054077 | Prelp           | 116847 | proline arginine-rich end leucine-rich repeat                                 | -3.36 | 0.67 | 0.01 |
| A_52_P22781  | AK133399  | D330038O06      | 330788 | RIKEN cDNA D330038O06 gene                                                    | -2.95 | 0.67 | 0.02 |
| A_52_P558382 | AK039129  | Mapk8           | 26419  | mitogen-activated protein kinase 8                                            | -2.73 | 0.67 | 0.05 |
| A_52_P385139 | NM_008098 | Mtpn            | 14489  | myotrophin                                                                    | -3.60 | 0.67 | 0.01 |
| A_52_P655982 | NM_010926 | Cox4nb          | 18117  | COX4 neighbor                                                                 | -4.41 | 0.67 | 0.00 |
| A_51_P393518 | BC016539  | Hmcn1           | 545370 | hemicentin 1                                                                  | -2.94 | 0.67 | 0.02 |
| A_51_P470443 | NM_145522 | Rabepk          | 227746 | Rab9 effector protein with kelch motifs                                       | -2.99 | 0.67 | 0.02 |
| A_51_P468398 | NM_175300 | Anapc2          | 99152  | anaphase promoting complex subunit 2                                          | -2.76 | 0.67 | 0.05 |
| A_52_P424959 | NM_153457 | Rtn1            | 104001 | reticulon 1                                                                   | -2.67 | 0.67 | 0.05 |
| A_51_P271733 | NM_033144 | 8-Sep           | 20362  | septin 8                                                                      | -2.63 | 0.67 | 0.07 |
| A_52_P5982   | AK032421  | Clpb            | 20480  | ClpB caseinolytic peptidase B homolog (E. coli)                               | -3.36 | 0.67 | 0.01 |
|              |           |                 |        | NADH dehydrogenase (ubiquinone) 1 alpha subcomplex, 4                         |       |      |      |
| A_52_P552832 | NM_010886 | Ndufa4          | 17992  |                                                                               | -4.22 | 0.66 | 0.00 |
| A_52_P234554 | XM_900750 | NA              | NA     | NA                                                                            | -3.10 | 0.66 | 0.02 |
| A_52_P620817 | AK030307  | Armc9           | 78795  | armadillo repeat containing 9                                                 | -2.69 | 0.66 | 0.05 |
| A_51_P400527 | NM_028975 | Tmem33          | 67878  | transmembrane protein 33                                                      | -3.64 | 0.66 | 0.00 |
| A_51_P394515 | NM_009388 | Tkt             | 21881  | transketolase                                                                 | -3.30 | 0.66 | 0.01 |
|              |           |                 |        | ceroid lipofuscinosis, neuronal 3, juvenile (Batten, Spielmeyer-Vogt disease) |       |      |      |
| A_51_P221612 | NM_009907 | Cln3            | 12752  |                                                                               | -2.64 | 0.66 | 0.06 |
| A_52_P353038 | NM_001025 | Trim26          | 22670  | tripartite motif-containing 26                                                | -2.62 | 0.66 | 0.07 |
| A_51_P375322 | AK154949  | Fam116b         | 69440  | family with sequence similarity 116, member B                                 | -3.17 | 0.66 | 0.01 |
| A_52_P414138 | NM_133218 | Zfp704          | 170753 | zinc finger protein 704                                                       | -2.65 | 0.66 | 0.06 |

|              |           |                 |        |                                                          |       |      |      |
|--------------|-----------|-----------------|--------|----------------------------------------------------------|-------|------|------|
| A_51_P244303 | NM_080470 | Smc1b           | 140557 | structural maintenance of chromosomes 1B                 | -2.88 | 0.66 | 0.03 |
| A_51_P315646 | NM_010911 | Nfs1            | 18041  | nitrogen fixation gene 1 ( <i>S. cerevisiae</i> )        | -4.04 | 0.66 | 0.00 |
| A_51_P350472 | AK139220  | Cdkl5           | 382253 | cyclin-dependent kinase-like 5                           | -3.99 | 0.66 | 0.00 |
| A_52_P78938  | AK030631  | Lmbr1           | 56873  | limb region 1                                            | -2.74 | 0.66 | 0.05 |
| A_51_P276063 | NM_010726 | Phyh            | 16922  | phytanoyl-CoA hydroxylase                                | -3.41 | 0.66 | 0.01 |
| A_51_P295708 | NM_026748 | Ints1           | 68510  | integrator complex subunit 1                             | -3.08 | 0.66 | 0.02 |
| A_52_P131997 | NM_007788 | Csnk2a1         | 12995  | casein kinase 2, alpha 1 polypeptide                     | -2.61 | 0.66 | 0.07 |
| A_52_P122664 | NM_010264 | Nr6a1           | 14536  | nuclear receptor subfamily 6, group A, member 1          | -2.78 | 0.66 | 0.04 |
| A_52_P430179 | NM_182930 | Plekha6         | 240753 | pleckstrin homology domain containing, family A member 6 | -3.30 | 0.66 | 0.01 |
| A_51_P323642 | NM_053226 | V1rb3           | 113853 | vomer nasal 1 receptor, B3                               | -2.91 | 0.66 | 0.03 |
| A_52_P654021 | NM_009357 | Tex261          | 21766  | testis expressed gene 261                                | -2.61 | 0.66 | 0.07 |
| A_52_P512427 | XM_132808 | 2510049J1.70291 |        | RIKEN cDNA 2510049J12 gene                               | -3.75 | 0.66 | 0.00 |
| A_52_P671329 | NM_133766 | Efr3a           | 76740  | EFR3 homolog A ( <i>S. cerevisiae</i> )                  | -2.68 | 0.66 | 0.05 |
| A_52_P380329 | NM_198600 | Papd7           | 210106 | PAP associated domain containing 7                       | -2.68 | 0.66 | 0.05 |
| A_52_P130490 | BC090402  | RP23-480B       | 665433 | similar to histone 2a                                    | -3.01 | 0.66 | 0.02 |
| A_52_P525317 | NM_008121 | Gja5            | 14613  | gap junction protein, alpha 5                            | -2.89 | 0.66 | 0.03 |
| A_51_P212690 | NM_146955 | Olfr60          | 18361  | olfactory receptor 60                                    | -2.72 | 0.66 | 0.05 |
| A_51_P123795 | NM_177684 | Zfp637          | 232337 | zinc finger protein 637                                  | -3.20 | 0.66 | 0.01 |
| A_52_P194170 | NM_026275 | Ube2r2          | 67615  | ubiquitin-conjugating enzyme E2R 2                       | -2.83 | 0.66 | 0.04 |
| A_52_P218623 | NA        | NA              | NA     | NA                                                       | -2.90 | 0.66 | 0.03 |
| A_52_P194805 | NM_026521 | Zfp706          | 68036  | zinc finger protein 706                                  | -2.85 | 0.66 | 0.03 |
| A_51_P378173 | NM_026787 | 1110012L1       | 68618  | RIKEN cDNA 1110012L19 gene                               | -2.96 | 0.66 | 0.02 |
| A_51_P269434 | NM_026697 | Rab14           | 68365  | RAB14, member RAS oncogene family                        | -2.75 | 0.66 | 0.05 |
| A_51_P449777 | NM_022995 | Pmepa1          | 65112  | prostate transmembrane protein, androgen induced 1       | -2.89 | 0.66 | 0.03 |
| A_52_P423849 | NM_015807 | Nt5c            | 50773  | 5',3'-nucleotidase, cytosolic                            | -2.83 | 0.66 | 0.04 |
| A_52_P60254  | NA        | NA              | NA     | NA                                                       | -3.03 | 0.66 | 0.02 |
| A_51_P502957 | NM_011505 | Stxbp4          | 20913  | syntaxin binding protein 4                               | -2.76 | 0.66 | 0.04 |
| A_52_P821117 | AV104666  | D2Wsu81e        | 227695 | DNA segment, Chr 2, Wayne State University 81, expressed | -2.60 | 0.66 | 0.07 |
| A_51_P277431 | NM_028804 | Ccdc3           | 74186  | coiled-coil domain containing 3                          | -3.35 | 0.66 | 0.01 |
| A_51_P492797 | NM_177736 | Lrrc61          | 243371 | leucine rich repeat containing 61                        | -3.51 | 0.66 | 0.01 |
| A_51_P154196 | NM_026029 | Glod4           | 67201  | glyoxalase domain containing 4                           | -3.18 | 0.66 | 0.01 |

|               |           |          |        |                                                                                                |       |      |      |
|---------------|-----------|----------|--------|------------------------------------------------------------------------------------------------|-------|------|------|
| A_52_P404363  | NM_183016 | Cdc42bpb | 217866 | CDC42 binding protein kinase beta                                                              | -2.71 | 0.66 | 0.05 |
| A_52_P196458  | NM_025943 | Dzip1    | 66573  | DAZ interacting protein 1                                                                      | -3.25 | 0.66 | 0.01 |
| A_51_P264186  | NM_027862 | Atp5h    | 71679  | ATP synthase, H <sup>+</sup> transporting, mitochondrial F0 complex, subunit d                 | -3.22 | 0.66 | 0.01 |
| A_52_P145482  | NM_146061 | Prr5     | 109270 | proline rich 5 (renal)                                                                         | -2.94 | 0.66 | 0.02 |
| A_52_P516187  | NA        | NA       | NA     | NA                                                                                             | -2.74 | 0.66 | 0.05 |
| A_51_P398517  | NM_021540 | Rnf130   | 59044  | ring finger protein 130                                                                        | -3.22 | 0.66 | 0.01 |
| A_51_P303095  | NM_024477 | Ttc28    | 209683 | tetratricopeptide repeat domain 28                                                             | -2.74 | 0.66 | 0.05 |
| A_51_P368557  | NM_138607 | Fam50a   | 108160 | family with sequence similarity 50, member A                                                   | -2.75 | 0.66 | 0.05 |
| A_52_P298165  | AK045826  | Gm14964  | 1E+08  | predicted gene 14964                                                                           | -3.24 | 0.66 | 0.01 |
| A_52_P325621  | NA        | NA       | NA     | NA                                                                                             | -3.75 | 0.66 | 0.00 |
| A_51_P231738  | NM_020566 | Dnajc4   | 57431  | DnaJ (Hsp40) homolog, subfamily C, member 4                                                    | -3.66 | 0.66 | 0.00 |
| A_51_P107090  | NM_001001 | BC031181 | 407819 | cDNA sequence BC031181                                                                         | -2.99 | 0.66 | 0.02 |
| A_52_P1173798 | NA        | NA       | NA     | NA                                                                                             | -3.41 | 0.66 | 0.01 |
| A_51_P388478  | NM_010110 | Efnb1    | 13641  | ephrin B1                                                                                      | -2.67 | 0.66 | 0.05 |
| A_52_P610808  | NM_001001 | Hexdc    | 238023 | hexosaminidase (glycosyl hydrolase family 20, catalytic domain) containing                     | -2.70 | 0.66 | 0.05 |
| A_52_P458191  | BC058520  | Ccdc43   | 52715  | coiled-coil domain containing 43                                                               | -3.17 | 0.66 | 0.01 |
| A_51_P264878  | NM_080595 | Emid1    | 140703 | EMI domain containing 1                                                                        | -3.41 | 0.66 | 0.01 |
| A_51_P249215  | NM_008964 | Ptger2   | 19217  | prostaglandin E receptor 2 (subtype EP2) transmembrane and tetratricopeptide repeat containing | -3.03 | 0.65 | 0.02 |
| A_52_P521091  | NM_028651 | Tmtc4    | 70551  | 4                                                                                              | -2.92 | 0.65 | 0.03 |
| A_51_P114287  | AK077833  | Cpsf6    | 432508 | cleavage and polyadenylation specific factor 6                                                 | -4.72 | 0.65 | 0.00 |
| A_52_P152274  | NM_024412 | Clnka    | 12733  | chloride channel Ka                                                                            | -3.42 | 0.65 | 0.01 |
| A_51_P449325  | NM_008206 | H2-Oa    | 15001  | histocompatibility 2, O region alpha locus                                                     | -3.90 | 0.65 | 0.00 |
| A_52_P62223   | NM_009163 | Sgpl1    | 20397  | sphingosine phosphate lyase 1                                                                  | -4.07 | 0.65 | 0.00 |
| A_51_P176711  | NM_026165 | Slc25a46 | 67453  | solute carrier family 25, member 46                                                            | -3.08 | 0.65 | 0.02 |
| A_52_P154045  | XM_485660 | NA       | NA     | NA                                                                                             | -3.53 | 0.65 | 0.01 |
| A_52_P143976  | NM_134159 | Il17rc   | 171095 | interleukin 17 receptor C                                                                      | -2.75 | 0.65 | 0.05 |
| A_52_P234087  | AK053336  | Tek      | 21687  | endothelial-specific receptor tyrosine kinase                                                  | -3.30 | 0.65 | 0.01 |
| A_52_P155990  | NM_130864 | Acaa1a   | 113868 | acetyl-Coenzyme A acyltransferase 1A                                                           | -2.82 | 0.65 | 0.04 |
| A_52_P665928  | NM_172529 | Gnptg    | 214505 | N-acetylglucosamine-1-phosphotransferase, gamma subunit                                        | -2.75 | 0.65 | 0.05 |

|              |           |         |        |                                                                 |       |      |      |
|--------------|-----------|---------|--------|-----------------------------------------------------------------|-------|------|------|
| A_52_P566406 | NM_009531 | Xpc     | 22591  | xeroderma pigmentosum, complementation group C                  | -3.58 | 0.65 | 0.01 |
| A_52_P405955 | NM_080452 | Mrps2   | 118451 | mitochondrial ribosomal protein S2                              | -3.02 | 0.65 | 0.02 |
| A_51_P195315 | U68535    | Akr1e1  | 56043  | aldo-keto reductase family 1, member E1                         | -2.80 | 0.65 | 0.04 |
| A_51_P224362 | NM_198111 | Akap6   | 238161 | A kinase (PRKA) anchor protein 6                                | -3.96 | 0.65 | 0.00 |
| A_52_P307922 | BC029674  | Flt1    | 14254  | FMS-like tyrosine kinase 1                                      | -2.93 | 0.65 | 0.02 |
| A_52_P408553 | AK047090  | Tbl2    | 27368  | transducin (beta)-like 2                                        | -3.11 | 0.65 | 0.02 |
| A_51_P142113 | NM_015740 | Bloc1s1 | 14533  | biogenesis of lysosome-related organelles complex-1, subunit 1  | -4.14 | 0.65 | 0.00 |
| A_51_P246215 | NM_027259 | Polr2i  | 69920  | polymerase (RNA) II (DNA directed) polypeptide I                | -2.71 | 0.65 | 0.05 |
| A_51_P309501 | NM_138602 | Praf2   | 54637  | PRA1 domain family 2                                            | -2.85 | 0.65 | 0.03 |
| A_51_P198694 | NM_144909 | Gckr    | 231103 | glucokinase regulatory protein                                  | -3.07 | 0.65 | 0.02 |
| A_51_P420276 | NM_026162 | Plxdc2  | 67448  | plexin domain containing 2                                      | -3.96 | 0.65 | 0.00 |
| A_52_P275627 | NM_008379 | Kpnb1   | 16211  | karyopherin (importin) beta 1                                   | -2.67 | 0.65 | 0.05 |
| A_51_P223111 | NM_028661 | Fam98c  | 73833  | family with sequence similarity 98, member C                    | -2.73 | 0.65 | 0.05 |
| A_51_P427768 | NM_007858 | Diap1   | 13367  | diaphanous homolog 1 (Drosophila)                               | -3.13 | 0.65 | 0.01 |
| A_51_P130475 | NM_009523 | Wnt4    | 22417  | wingless-related MMTV integration site 4                        | -3.07 | 0.65 | 0.02 |
| A_51_P410813 | AK079732  | Nav2    | 78286  | neuron navigator 2                                              | -2.82 | 0.65 | 0.04 |
| A_51_P118417 | NM_029023 | Scsep1  | 74617  | serine carboxypeptidase 1                                       | -2.82 | 0.65 | 0.04 |
| A_52_P330984 | AK089989  | Lin9    | 72568  | lin-9 homolog (C. elegans)                                      | -2.77 | 0.65 | 0.04 |
| A_51_P224505 | NM_009736 | Bag1    | 12017  | BCL2-associated athanogene 1                                    | -2.61 | 0.65 | 0.07 |
| A_51_P237746 | AK004226  | NA      | NA     | NA                                                              | -3.80 | 0.65 | 0.00 |
| A_51_P204845 | AK014492  | Cugbp1  | 13046  | CUG triplet repeat, RNA binding protein 1                       | -3.55 | 0.65 | 0.01 |
| A_51_P436342 | NM_008268 | Hoxb5   | 15413  | homeobox B5                                                     | -3.77 | 0.65 | 0.00 |
| A_52_P567658 | NM_198602 | Cux1    | 13047  | cut-like homeobox 1                                             | -2.76 | 0.65 | 0.05 |
| A_51_P106263 | NM_133926 | Camk1   | 52163  | calcium/calmodulin-dependent protein kinase I                   | -2.96 | 0.65 | 0.02 |
| A_51_P494686 | NM_145937 | Sumf1   | 58911  | sulfatase modifying factor 1                                    | -3.62 | 0.65 | 0.00 |
| A_52_P398974 | NM_012065 | Pde6g   | 18588  | phosphodiesterase 6G, cGMP-specific, rod, gamma                 | -3.75 | 0.65 | 0.00 |
| A_51_P272123 | NM_024197 | Ndufa10 | 67273  | NADH dehydrogenase (ubiquinone) 1 alpha subcomplex 10           | -2.68 | 0.65 | 0.05 |
| A_51_P306067 | NM_178665 | Lpp     | 210126 | LIM domain containing preferred translocation partner in lipoma | -3.25 | 0.65 | 0.01 |

|              |           |            |        |                                                              |       |      |      |
|--------------|-----------|------------|--------|--------------------------------------------------------------|-------|------|------|
| A_51_P110189 | NM_053273 | Ttyh2      | 117160 | tweety homolog 2 (Drosophila)                                | -3.97 | 0.65 | 0.00 |
| A_51_P433834 | NM_146137 | Amigo1     | 229715 | adhesion molecule with Ig like domain 1                      | -3.28 | 0.65 | 0.01 |
| A_51_P272993 | NM_172290 | Ntm        | 235106 | neurotrimin                                                  | -3.07 | 0.65 | 0.02 |
| A_51_P221801 | NM_010163 | Ext2       | 14043  | exostoses (multiple) 2                                       | -3.49 | 0.65 | 0.01 |
| A_51_P381178 | AK038975  | Zbtb46     | 72147  | zinc finger and BTB domain containing 46                     | -2.71 | 0.65 | 0.05 |
| A_52_P435016 | NM_019572 | Hdac7      | 56233  | histone deacetylase 7                                        | -3.36 | 0.65 | 0.01 |
| A_51_P212271 | NM_031998 | Tsga14     | 83922  | testis specific gene A14                                     | -3.07 | 0.65 | 0.02 |
| A_51_P448677 | NM_008790 | Pcp2       | 18545  | Purkinje cell protein 2 (L7)                                 | -2.75 | 0.65 | 0.05 |
| A_51_P232556 | NM_028721 | Nphp3      | 74025  | nephronophthisis 3 (adolescent)                              | -2.80 | 0.65 | 0.04 |
| A_51_P247873 | NM_026061 | Ndufb8     | 67264  | NADH dehydrogenase (ubiquinone) 1 beta subcomplex 8          | -5.05 | 0.65 | 0.00 |
| A_52_P622042 | NM_053256 | Pth2       | 114640 | parathyroid hormone 2                                        | -3.13 | 0.65 | 0.01 |
| A_51_P268033 | BC026638  | Mgat4b     | 103534 | mannoside acetylglucosaminyltransferase 4, isoenzyme B       | -2.67 | 0.65 | 0.05 |
| A_52_P128968 | NM_029342 | Nhej1      | 75570  | nonhomologous end-joining factor 1                           | -3.17 | 0.65 | 0.01 |
| A_52_P131778 | NM_178886 | Ldlrad3    | 241576 | low density lipoprotein receptor class A domain containing 3 | -4.14 | 0.65 | 0.00 |
| A_51_P150710 | NM_152839 | Igj        | 16069  | immunoglobulin joining chain                                 | -3.53 | 0.65 | 0.01 |
| A_52_P490493 | NM_026599 | Cgnl1      | 68178  | cingulin-like 1                                              | -2.68 | 0.65 | 0.05 |
| A_51_P233226 | NM_146091 | Atl3       | 109168 | atlastin GTPase 3                                            | -3.74 | 0.65 | 0.00 |
| A_52_P620893 | BC030311  | Armc8      | 74125  | armadillo repeat containing 8                                | -2.90 | 0.64 | 0.03 |
| A_51_P200819 | NM_016764 | Prdx4      | 53381  | peroxiredoxin 4                                              | -3.21 | 0.64 | 0.01 |
| A_51_P155142 | NM_026560 | Cdca8      | 52276  | cell division cycle associated 8                             | -2.73 | 0.64 | 0.05 |
| A_51_P417998 | NM_013757 | Sytl4      | 27359  | synaptotagmin-like 4                                         | -2.93 | 0.64 | 0.02 |
| A_51_P509229 | NM_144925 | Tnrc6a     | 233833 | trinucleotide repeat containing 6a                           | -2.66 | 0.64 | 0.06 |
| A_51_P329251 | NM_025366 | Chchd1     | 66121  | coiled-coil-helix-coiled-coil-helix domain containing 1      | -2.89 | 0.64 | 0.03 |
| A_51_P177552 | NM_023172 | Ndufb9     | 66218  | NADH dehydrogenase (ubiquinone) 1 beta subcomplex, 9         | -3.88 | 0.64 | 0.00 |
| A_51_P260312 | NM_172753 | Csgalnact1 | 234356 | chondroitin sulfate N-acetylgalactosaminyltransferase 1      | -3.47 | 0.64 | 0.01 |
| A_52_P31155  | NM_177577 | Dcdc2a     | 195208 | doublecortin domain containing 2a                            | -3.16 | 0.64 | 0.01 |
| A_51_P146953 | NM_133229 | Ripply3    | 170765 | rippy3 homolog (zebrafish)                                   | -2.86 | 0.64 | 0.03 |
| A_51_P246690 | NM_020329 | Dolpp1     | 57170  | dolichyl pyrophosphate phosphatase 1                         | -2.92 | 0.64 | 0.03 |

|              |           |            |        |                                                                                |       |      |      |
|--------------|-----------|------------|--------|--------------------------------------------------------------------------------|-------|------|------|
| A_52_P95921  | NM_028873 | Dnajc14    | 74330  | Dnaj (Hsp40) homolog, subfamily C, member 14                                   | -3.23 | 0.64 | 0.01 |
| A_51_P243963 | NM_181315 | Car5b      | 56078  | carbonic anhydrase 5b, mitochondrial                                           | -3.03 | 0.64 | 0.02 |
| A_52_P153929 | NM_178309 | Brip1      | 237911 | BRCA1 interacting protein C-terminal helicase 1                                | -2.86 | 0.64 | 0.03 |
| A_52_P179905 | AK006763  | Ak2        | 11637  | adenylate kinase 2                                                             | -3.01 | 0.64 | 0.02 |
| A_52_P556134 | XM_908122 | NA         | NA     | NA                                                                             | -2.69 | 0.64 | 0.05 |
| A_52_P388359 | NM_007453 | Prdx6      | 11758  | peroxiredoxin 6                                                                | -3.45 | 0.64 | 0.01 |
| A_51_P367081 | NM_011074 | Cdk14      | 18647  | cyclin-dependent kinase 14                                                     | -3.58 | 0.64 | 0.01 |
| A_52_P315022 | XM_917083 | Syne2      | 319565 | synaptic nuclear envelope 2                                                    | -2.80 | 0.64 | 0.04 |
| A_51_P413740 | NM_080845 | Ftcd       | 14317  | formiminotransferase cyclodeaminase                                            | -2.78 | 0.64 | 0.04 |
| A_52_P272811 | NM_053193 | Cpsf1      | 94230  | cleavage and polyadenylation specific factor 1                                 | -3.15 | 0.64 | 0.01 |
| A_51_P512859 | NM_007496 | Zfhx3      | 11906  | zinc finger homeobox 3                                                         | -4.03 | 0.64 | 0.00 |
| A_51_P340805 | NM_001039 | Zkscan4    | 544922 | zinc finger with KRAB and SCAN domains 4                                       | -2.87 | 0.64 | 0.03 |
| A_51_P400773 | NM_008233 | Hdgfrp2    | 15193  | hepatoma-derived growth factor, related protein 2                              | -4.18 | 0.64 | 0.00 |
| A_52_P360453 | AK084271  | 3110052M02 | 73229  | RIKEN cDNA 3110052M02 gene                                                     | -2.68 | 0.64 | 0.05 |
| A_51_P307370 | NM_011305 | Rxra       | 20181  | retinoid X receptor alpha                                                      | -4.16 | 0.64 | 0.00 |
| A_52_P260592 | NM_020601 | Tbl1x      | 21372  | transducin (beta)-like 1 X-linked                                              | -3.49 | 0.64 | 0.01 |
| A_52_P883283 | AK034355  | NA         | NA     | NA                                                                             | -3.17 | 0.64 | 0.01 |
| A_52_P195955 | NM_028387 | MacroD2    | 72899  | MACRO domain containing 2                                                      | -2.70 | 0.64 | 0.05 |
| A_52_P35064  | NM_028454 | Tm7sf2     | 73166  | transmembrane 7 superfamily member 2                                           | -2.68 | 0.64 | 0.05 |
| A_51_P427317 | NM_013855 | Abca3      | 27410  | ATP-binding cassette, sub-family A (ABC1), member 3                            | -4.13 | 0.64 | 0.00 |
| A_52_P37091  | NA        | NA         | NA     | NA                                                                             | -2.81 | 0.64 | 0.04 |
| A_51_P467798 | NM_022018 | Fam129a    | 63913  | family with sequence similarity 129, member A                                  | -3.66 | 0.64 | 0.00 |
| A_52_P20391  | CB182661  | NA         | NA     | NA                                                                             | -3.05 | 0.64 | 0.02 |
| A_52_P343381 | NM_001033 | 1810064F2  | 69862  | RIKEN cDNA 1810064F22 gene<br>ArfGAP with GTPase domain, ankyrin repeat and PH | -3.24 | 0.64 | 0.01 |
| A_51_P488121 | NM_001033 | Agap2      | 216439 | domain 2                                                                       | -2.73 | 0.64 | 0.05 |
| A_52_P407022 | NM_177411 | Rab5b      | 19344  | RAB5B, member RAS oncogene family                                              | -2.78 | 0.64 | 0.04 |
| A_51_P234627 | BC062175  | Nubpl      | 76826  | nucleotide binding protein-like                                                | -3.02 | 0.64 | 0.02 |
| A_52_P62051  | NM_030037 | Mospd3     | 68929  | motile sperm domain containing 3                                               | -3.50 | 0.64 | 0.01 |
| A_52_P426513 | NM_019989 | Sh3bgrl    | 56726  | SH3-binding domain glutamic acid-rich protein like                             | -2.78 | 0.64 | 0.04 |
| A_51_P196774 | AK046456  | Prr16      | 71373  | proline rich 16                                                                | -2.67 | 0.64 | 0.05 |

|              |           |           |        |                                                                 |       |      |      |
|--------------|-----------|-----------|--------|-----------------------------------------------------------------|-------|------|------|
| A_51_P182456 | AK009638  | Pcgf3     | 69587  | polycomb group ring finger 3                                    | -3.01 | 0.64 | 0.02 |
| A_51_P175784 | NM_009719 | Neurog3   | 11925  | neurogenin 3                                                    | -2.73 | 0.64 | 0.05 |
| A_51_P394244 | XM_484075 | NA        | NA     | NA                                                              | -3.12 | 0.64 | 0.01 |
| A_51_P244543 | NM_001002 | 2610507B1 | 72503  | RIKEN cDNA 2610507B11 gene                                      | -2.81 | 0.64 | 0.04 |
| A_52_P149213 | NA        | NA        | NA     | NA                                                              | -3.28 | 0.64 | 0.01 |
| A_51_P205573 | NM_019435 | Ndufb11   | 104130 | NADH dehydrogenase (ubiquinone) 1 beta subcomplex, 11           | -2.94 | 0.64 | 0.02 |
| A_51_P284918 | BC028776  | Tshz2     | 228911 | teashirt zinc finger family member 2                            | -3.67 | 0.64 | 0.00 |
| A_51_P469252 | NM_172817 | Zfp647    | 239546 | zinc finger protein 647                                         | -3.08 | 0.64 | 0.02 |
| A_52_P604849 | NM_013884 | Cspg5     | 29873  | chondroitin sulfate proteoglycan 5                              | -3.41 | 0.64 | 0.01 |
| A_51_P321531 | AF479672  | Purg      | 75029  | purine-rich element binding protein G                           | -3.14 | 0.64 | 0.01 |
| A_51_P270733 | NM_009303 | Syngn1    | 20972  | synaptogyrin 1                                                  | -4.73 | 0.64 | 0.00 |
| A_51_P175146 | NM_027769 | Cpne3     | 70568  | copine III                                                      | -3.34 | 0.64 | 0.01 |
| A_51_P376934 | NM_019517 | Bace2     | 56175  | beta-site APP-cleaving enzyme 2                                 | -3.54 | 0.64 | 0.01 |
| A_52_P175304 | NM_013771 | Yme11     | 27377  | YME1-like 1 ( <i>S. cerevisiae</i> )                            | -3.22 | 0.64 | 0.01 |
| A_51_P388517 | NM_001077 | Ldb2      | 16826  | LIM domain binding 2                                            | -2.89 | 0.64 | 0.03 |
| A_51_P210885 | NM_172463 | Sned1     | 208777 | sushi, nidogen and EGF-like domains 1                           | -4.27 | 0.64 | 0.00 |
| A_51_P394446 | AK032385  | Erc2      | 238988 | ELKS/RAB6-interacting/CAST family member 2                      | -3.48 | 0.64 | 0.01 |
| A_52_P964362 | AW455994  | NA        | NA     | NA                                                              | -4.16 | 0.64 | 0.00 |
| A_52_P464003 | NM_026402 | Atg3      | 67841  | autophagy-related 3 (yeast)                                     | -2.70 | 0.64 | 0.05 |
| A_51_P454166 | NM_010829 | Msh3      | 17686  | mutS homolog 3 ( <i>E. coli</i> )                               | -2.78 | 0.64 | 0.04 |
| A_52_P277604 | NM_172793 | Btnl9     | 237754 | butyrophilin-like 9                                             | -3.49 | 0.64 | 0.01 |
| A_51_P367298 | BU554808  | NA        | NA     | NA                                                              | -3.79 | 0.64 | 0.00 |
| A_51_P345714 | NM_011647 | Tsc2      | 22084  | tuberous sclerosis 2                                            | -3.01 | 0.64 | 0.02 |
| A_51_P207849 | NM_026975 | Bola1     | 69168  | bolaA-like 1 ( <i>E. coli</i> )                                 | -3.33 | 0.64 | 0.01 |
| A_51_P308347 | NM_172826 | Dact2     | 240025 | dapper homolog 2, antagonist of beta-catenin ( <i>xenopus</i> ) | -3.59 | 0.64 | 0.01 |
| A_52_P422618 | NM_007397 | Acvr2b    | 11481  | activin receptor IIB                                            | -2.75 | 0.64 | 0.05 |
| A_51_P169128 | NM_025879 | 2410002O2 | 66975  | RIKEN cDNA 2410002O22 gene                                      | -2.82 | 0.64 | 0.04 |
| A_52_P335892 | BC056383  | Luc7l2    | 192196 | LUC7-like 2 ( <i>S. cerevisiae</i> )                            | -4.39 | 0.64 | 0.00 |
| A_51_P280192 | AK014035  | 1810027O1 | 169186 | RIKEN cDNA 1810027O10 gene                                      | -4.51 | 0.64 | 0.00 |
| A_51_P497451 | NM_178660 | Rbms3     | 207181 | RNA binding motif, single stranded interacting protein          | -3.37 | 0.64 | 0.01 |
| A_52_P128935 | NM_026501 | Fam134c   | 67998  | family with sequence similarity 134, member C                   | -3.94 | 0.64 | 0.00 |



|              |           |           |        |                                                        |       |      |      |
|--------------|-----------|-----------|--------|--------------------------------------------------------|-------|------|------|
| A_52_P372151 | NM_018761 | Ctnnal1   | 54366  | catenin (cadherin associated protein), alpha-like 1    | -2.64 | 0.64 | 0.06 |
| A_51_P105263 | NM_201355 | Nat14     | 269854 | N-acetyltransferase 14                                 | -3.02 | 0.64 | 0.02 |
|              |           |           |        | translocase of inner mitochondrial membrane 8          |       |      |      |
| A_52_P520397 | NM_013897 | Timm8b    | 30057  | homolog b (yeast)                                      | -3.39 | 0.64 | 0.01 |
| A_52_P684138 | NM_058212 | Dpf3      | 70127  | D4, zinc and double PHD fingers, family 3              | -3.73 | 0.64 | 0.00 |
| A_51_P433228 | NM_009829 | Ccnd2     | 12444  | cyclin D2                                              | -2.76 | 0.64 | 0.04 |
| A_52_P279120 | NA        | NA        | NA     | NA                                                     | -3.97 | 0.64 | 0.00 |
| A_52_P524540 | NA        | NA        | NA     | NA                                                     | -3.66 | 0.64 | 0.00 |
| A_51_P341664 | NM_133228 | Zfp87     | 170763 | zinc finger protein 87                                 | -3.41 | 0.64 | 0.01 |
| A_52_P553069 | AK052877  | Prkg1     | 19091  | protein kinase, cGMP-dependent, type I                 | -2.91 | 0.64 | 0.03 |
| A_51_P331781 | XM_127489 | Fam151b   | 73942  | family with sequence similarity 151, member B          | -2.63 | 0.64 | 0.07 |
| A_52_P473344 | AK172219  | Sreb2     | 20788  | sterol regulatory element binding factor 2             | -3.44 | 0.64 | 0.01 |
| A_51_P321807 | AK015841  | 4930519F0 | 114676 | RIKEN cDNA 4930519F09 gene                             | -3.05 | 0.64 | 0.02 |
| A_51_P436201 | NM_010256 | Gart      | 14450  | phosphoribosylglycinamide formyltransferase            | -3.31 | 0.64 | 0.01 |
| A_52_P867545 | XM_974120 | NA        | NA     | NA                                                     | -2.84 | 0.64 | 0.03 |
| A_52_P423183 | NM_130864 | Acaa1a    | 113868 | acetyl-Coenzyme A acyltransferase 1A                   | -2.92 | 0.64 | 0.03 |
| A_51_P177518 | NM_025318 | Tmem93    | 66048  | transmembrane protein 93                               | -3.22 | 0.64 | 0.01 |
| A_52_P297075 | NM_177171 | Heatr5a   | 320487 | HEAT repeat containing 5A                              | -2.82 | 0.64 | 0.04 |
| A_51_P405985 | NM_133999 | Fig4      | 103199 | FIG4 homolog ( <i>S. cerevisiae</i> )                  | -3.23 | 0.63 | 0.01 |
|              |           |           |        | CTD (carboxy-terminal domain, RNA polymerase II,       |       |      |      |
| A_51_P486943 | NM_133710 | Ctdspl    | 69274  | polypeptide A) small phosphatase-like                  | -2.93 | 0.63 | 0.02 |
| A_52_P57686  | NM_144820 | Ccdc28a   | 215814 | coiled-coil domain containing 28A                      | -2.69 | 0.63 | 0.05 |
| A_51_P241101 | X61497    | NA        | NA     | NA                                                     | -3.73 | 0.63 | 0.00 |
|              |           |           |        | CTD (carboxy-terminal domain, RNA polymerase II,       |       |      |      |
| A_52_P473953 | NM_133710 | Ctdspl    | 69274  | polypeptide A) small phosphatase-like                  | -3.16 | 0.63 | 0.01 |
| A_51_P496905 | NM_007686 | Cfi       | 12630  | complement component factor i                          | -3.30 | 0.63 | 0.01 |
| A_52_P436447 | NM_028048 | Slc25a35  | 71998  | solute carrier family 25, member 35                    | -4.09 | 0.63 | 0.00 |
| A_51_P158814 | XM_994605 | NA        | NA     | NA                                                     | -2.97 | 0.63 | 0.02 |
|              |           |           |        | pleckstrin homology domain containing, family J        |       |      |      |
| A_51_P196509 | NM_023900 | Plekhj1   | 78670  | member 1                                               | -2.67 | 0.63 | 0.05 |
|              |           |           |        | amyloid beta (A4) precursor protein-binding, family B, |       |      |      |
| A_51_P149562 | NM_009686 | Apbb2     | 11787  | member 2                                               | -3.46 | 0.63 | 0.01 |
| A_52_P276525 | NM_175207 | Ankrd9    | 74251  | ankyrin repeat domain 9                                | -2.63 | 0.63 | 0.07 |

|              |           |           |        |                                                                                                             |       |      |      |
|--------------|-----------|-----------|--------|-------------------------------------------------------------------------------------------------------------|-------|------|------|
|              |           |           |        | phosphatidic acid phosphatase type 2 domain                                                                 |       |      |      |
| A_51_P321374 | NM_145521 | Ppapdc3   | 227721 | containing 3                                                                                                | -2.78 | 0.63 | 0.04 |
| A_52_P217838 | NM_011732 | Ybx1      | 22608  | Y box protein 1                                                                                             | -4.37 | 0.63 | 0.00 |
| A_51_P513085 | NM_024240 | Gins4     | 109145 | GINS complex subunit 4 (Sld5 homolog)                                                                       | -2.79 | 0.63 | 0.04 |
|              |           |           |        | solute carrier family 1 (neuronal/epithelial high affinity                                                  |       |      |      |
|              |           |           |        | glutamate transporter, system Xag), member 1                                                                |       |      |      |
| A_52_P469277 | AF087578  | Slc1a1    | 20510  | glutamate transporter, system Xag), member 1                                                                | -4.74 | 0.63 | 0.00 |
| A_51_P162437 | XM_898043 | NA        | NA     | NA                                                                                                          | -3.81 | 0.63 | 0.00 |
| A_51_P319022 | NM_009910 | Cxcr3     | 12766  | chemokine (C-X-C motif) receptor 3                                                                          | -3.36 | 0.63 | 0.01 |
| A_52_P366047 | NM_145938 | Rpp40     | 208366 | ribonuclease P 40 subunit (human)                                                                           | -2.69 | 0.63 | 0.05 |
| A_52_P336357 | NM_212433 | Fbxo3     | 57443  | F-box protein 3                                                                                             | -3.49 | 0.63 | 0.01 |
| A_51_P143855 | NM_026402 | Atg3      | 67841  | autophagy-related 3 (yeast)                                                                                 | -3.20 | 0.63 | 0.01 |
| A_52_P14938  | BB000796  | NA        | NA     | NA                                                                                                          | -3.27 | 0.63 | 0.01 |
| A_52_P293785 | NA        | NA        | NA     | NA                                                                                                          | -4.67 | 0.63 | 0.00 |
|              |           |           |        | membrane-bound transcription factor peptidase, site 1                                                       |       |      |      |
| A_52_P589065 | NM_019709 | Mbtps1    | 56453  | membrane-bound transcription factor peptidase, site 1                                                       | -3.81 | 0.63 | 0.00 |
| A_51_P504658 | NM_207142 | Olf1036   | 258245 | olfactory receptor 1036                                                                                     | -3.03 | 0.63 | 0.02 |
| A_52_P285470 | XM_130308 | NA        | NA     | NA                                                                                                          | -3.20 | 0.63 | 0.01 |
| A_52_P16209  | NM_001002 | 2610507B1 | 72503  | RIKEN cDNA 2610507B11 gene                                                                                  | -2.63 | 0.63 | 0.07 |
| A_51_P202050 | NM_008052 | Dtx1      | 14357  | deltex 1 homolog (Drosophila)                                                                               | -4.29 | 0.63 | 0.00 |
| A_52_P15377  | NM_011719 | Wnt9b     | 22412  | wingless-type MMTV integration site 9B                                                                      | -2.61 | 0.63 | 0.07 |
| A_52_P394111 | NA        | NA        | NA     | NA                                                                                                          | -2.76 | 0.63 | 0.05 |
| A_52_P136195 | AB015858  | Mycbp     | 56309  | c-myc binding protein                                                                                       | -3.38 | 0.63 | 0.01 |
| A_51_P289507 | NM_172519 | Dis3l     | 213550 | DIS3 mitotic control homolog (S. cerevisiae)-like                                                           | -2.94 | 0.63 | 0.02 |
| A_51_P303089 | AK122427  | Ttc28     | 209683 | tetratricopeptide repeat domain 28                                                                          | -3.45 | 0.63 | 0.01 |
|              |           |           |        | proline-rich Gla (G-carboxyglutamic acid) polypeptide 2                                                     |       |      |      |
| A_51_P284233 | NM_022999 | Prrg2     | 65116  | proline-rich Gla (G-carboxyglutamic acid) polypeptide 2                                                     | -3.02 | 0.63 | 0.02 |
| A_52_P78423  | AK039175  | 5330421C1 | 78279  | RIKEN cDNA 5330421C15 gene                                                                                  | -3.18 | 0.63 | 0.01 |
| A_52_P501890 | NM_026332 | Dnajc19   | 67713  | Dnaj (Hsp40) homolog, subfamily C, member 19                                                                | -3.41 | 0.63 | 0.01 |
| A_51_P266940 | NM_172414 | Fam164c   | 72350  | family with sequence similarity 164, member C                                                               | -2.84 | 0.63 | 0.03 |
|              |           |           |        | WW domain containing E3 ubiquitin protein ligase 2                                                          |       |      |      |
|              |           |           |        | protein phosphatase 1, regulatory (inhibitor) subunit                                                       |       |      |      |
| A_52_P110999 | NM_025830 | Wwp2      | 66894  | WW domain containing E3 ubiquitin protein ligase 2<br>protein phosphatase 1, regulatory (inhibitor) subunit | -3.19 | 0.63 | 0.01 |
| A_52_P110157 | NM_033371 | Ppp1r16a  | 73062  | 16A                                                                                                         | -4.46 | 0.63 | 0.00 |

|              |           |           |        |                                                                                                    |       |      |      |
|--------------|-----------|-----------|--------|----------------------------------------------------------------------------------------------------|-------|------|------|
| A_51_P344586 | NM_010616 | Kif12     | 16552  | kinesin family member 12                                                                           | -3.13 | 0.63 | 0.01 |
| A_51_P130079 | NM_008511 | Lrmp      | 16970  | lymphoid-restricted membrane protein                                                               | -3.01 | 0.63 | 0.02 |
| A_52_P258250 | AK050742  | B23021701 | 320879 | RIKEN cDNA B230217012 gene                                                                         | -3.80 | 0.63 | 0.00 |
| A_52_P596080 | AK088678  | Hnrnpc    | 15381  | heterogeneous nuclear ribonucleoprotein C<br>COX11 homolog, cytochrome c oxidase assembly          | -2.77 | 0.63 | 0.04 |
| A_51_P214319 | NM_199008 | Cox11     | 69802  | protein (yeast)                                                                                    | -3.73 | 0.63 | 0.00 |
| A_52_P819555 | AK048651  | NA        | NA     | NA                                                                                                 | -3.79 | 0.63 | 0.00 |
| A_51_P116157 | NA        | NA        | NA     | NA                                                                                                 | -2.78 | 0.63 | 0.04 |
| A_52_P419059 | NA        | NA        | NA     | NA                                                                                                 | -3.63 | 0.63 | 0.00 |
| A_52_P154026 | NM_001005 | Zcwpw1    | 381678 | zinc finger, CW type with PWWP domain 1                                                            | -4.65 | 0.63 | 0.00 |
| A_51_P408604 | NM_028115 | Trub1     | 72133  | TruB pseudouridine (psi) synthase homolog 1 (E. coli)                                              | -3.02 | 0.63 | 0.02 |
| A_52_P514317 | NM_144902 | Slc35a3   | 229782 | solute carrier family 35 (UDP-N-acetylglucosamine (UDP-GlcNAc) transporter), member 3              | -4.72 | 0.63 | 0.00 |
| A_51_P322022 | NM_001012 | Hspb6     | 243912 | heat shock protein, alpha-crystallin-related, B6                                                   | -3.88 | 0.63 | 0.00 |
| A_52_P338033 | AK135612  | Rcor3     | 214742 | REST corepressor 3                                                                                 | -3.71 | 0.63 | 0.00 |
| A_52_P514488 | NM_177788 | Exoc3l    | 277978 | exocyst complex component 3-like                                                                   | -3.63 | 0.63 | 0.00 |
| A_51_P503352 | NM_033079 | D6Mm5e    | 110958 | DNA segment, Chr 6, Miriam Meisler 5, expressed                                                    | -2.88 | 0.63 | 0.03 |
| A_52_P280448 | NA        | NA        | NA     | NA                                                                                                 | -3.09 | 0.63 | 0.02 |
| A_52_P244702 | NM_009331 | Tcf7      | 21414  | transcription factor 7, T-cell specific                                                            | -2.94 | 0.63 | 0.02 |
| A_52_P423357 | NM_145353 | Yipf3     | 28064  | Yip1 domain family, member 3                                                                       | -3.47 | 0.62 | 0.01 |
| A_51_P206203 | NM_145379 | Mrgprf    | 211577 | MAS-related GPR, member F                                                                          | -2.81 | 0.62 | 0.04 |
| A_52_P340073 | NM_010111 | Efnb2     | 13642  | ephrin B2                                                                                          | -2.78 | 0.62 | 0.04 |
| A_52_P515036 | NM_016865 | Htatip2   | 53415  | HIV-1 tat interactive protein 2, homolog (human)                                                   | -3.09 | 0.62 | 0.02 |
| A_51_P518298 | BC072613  | Rnf187    | 108660 | ring finger protein 187                                                                            | -2.72 | 0.62 | 0.05 |
| A_52_P194680 | BI152977  | NA        | NA     | NA                                                                                                 | -4.14 | 0.62 | 0.00 |
| A_52_P655297 | NA        | NA        | NA     | NA                                                                                                 | -5.02 | 0.62 | 0.00 |
| A_52_P117313 | NM_018745 | Azin1     | 54375  | antizyme inhibitor 1                                                                               | -5.17 | 0.62 | 0.00 |
| A_52_P657317 | NM_026938 | Tmem160   | 69094  | transmembrane protein 160                                                                          | -4.35 | 0.62 | 0.00 |
| A_52_P131353 | NM_177343 | Camk1d    | 227541 | calcium/calmodulin-dependent protein kinase ID<br>Ras-GTPase-activating protein SH3-domain binding | -4.13 | 0.62 | 0.00 |
| A_51_P367343 | NM_013716 | G3bp1     | 27041  | protein 1                                                                                          | -2.70 | 0.62 | 0.05 |

|              |           |            |        |                                                                                |       |      |      |
|--------------|-----------|------------|--------|--------------------------------------------------------------------------------|-------|------|------|
| A_52_P324754 | NM_026916 | 4930579G2  | 69034  | RIKEN cDNA 4930579G22 gene                                                     | -2.87 | 0.62 | 0.03 |
| A_51_P293715 | NM_054071 | Fgfr1      | 116701 | fibroblast growth factor receptor-like 1                                       | -2.69 | 0.62 | 0.05 |
| A_51_P470414 | NM_138600 | Aldh7a1    | 110695 | aldehyde dehydrogenase family 7, member A1                                     | -3.21 | 0.62 | 0.01 |
| A_51_P247034 | NM_133694 | Fbxl15     | 68431  | F-box and leucine-rich repeat protein 15                                       | -3.52 | 0.62 | 0.01 |
| A_51_P295575 | NM_025530 | Cutc       | 66388  | cutC copper transporter homolog (E.coli)                                       | -2.93 | 0.62 | 0.03 |
| A_52_P262428 | AK122343  | Fkbp15     | 338355 | FK506 binding protein 15                                                       | -3.04 | 0.62 | 0.02 |
| A_52_P148678 | AK169695  | Plcg1      | 18803  | phospholipase C, gamma 1                                                       | -2.99 | 0.62 | 0.02 |
| A_52_P301503 | NM_007941 | Stx2       | 13852  | syntaxin 2                                                                     | -3.39 | 0.62 | 0.01 |
| A_51_P102652 | NM_023397 | Mdp1       | 67881  | magnesium-dependent phosphatase 1                                              | -3.51 | 0.62 | 0.01 |
| A_52_P323658 | BC094586  | Zfp422-rs1 | 77652  | zinc finger protein 422, related sequence 1                                    | -2.77 | 0.62 | 0.04 |
| A_51_P501473 | AK083741  | G3bp1      | 27041  | Ras-GTPase-activating protein SH3-domain binding protein 1                     | -3.05 | 0.62 | 0.02 |
| A_52_P612137 | NM_009822 | Runx1t1    | 12395  | runt-related transcription factor 1; translocated to, 1 (cyclin D-related)     | -3.25 | 0.62 | 0.01 |
| A_52_P463687 | AK133434  | AI426330   | 101563 | expressed sequence AI426330                                                    | -3.00 | 0.62 | 0.02 |
| A_51_P455946 | NM_133223 | Rac3       | 170758 | RAS-related C3 botulinum substrate 3                                           | -2.78 | 0.62 | 0.04 |
| A_52_P335166 | NM_001012 | Slc2a9     | 117591 | solute carrier family 2 (facilitated glucose transporter), member 9            | -4.93 | 0.62 | 0.00 |
| A_51_P494646 | NM_001003 | Rtn3       | 20168  | reticulon 3                                                                    | -2.67 | 0.62 | 0.05 |
| A_51_P345362 | NM_001003 | Arhgef11   | 213498 | Rho guanine nucleotide exchange factor (GEF) 11                                | -2.70 | 0.62 | 0.05 |
| A_51_P431491 | AB093257  | Rab11fip3  | 215445 | RAB11 family interacting protein 3 (class II)                                  | -3.22 | 0.62 | 0.01 |
| A_52_P640355 | NM_027862 | Atp5h      | 71679  | ATP synthase, H <sup>+</sup> transporting, mitochondrial F0 complex, subunit d | -5.11 | 0.62 | 0.00 |
| A_51_P431996 | NM_175494 | Zfp367     | 238673 | zinc finger protein 367                                                        | -2.67 | 0.62 | 0.05 |
| A_51_P488768 | NM_178696 | Slc25a44   | 229517 | solute carrier family 25, member 44                                            | -2.96 | 0.62 | 0.02 |
| A_52_P594290 | AK164078  | Wdfy2      | 268752 | WD repeat and FYVE domain containing 2                                         | -3.60 | 0.62 | 0.01 |
| A_52_P225249 | NM_018772 | Bri3       | 55950  | brain protein I3                                                               | -2.90 | 0.62 | 0.03 |
| A_51_P260871 | NM_025848 | Sdhd       | 66925  | succinate dehydrogenase complex, subunit D, integral membrane protein          | -3.58 | 0.62 | 0.01 |
| A_52_P282700 | NM_020256 | Zbtb33     | 56805  | zinc finger and BTB domain containing 33                                       | -2.89 | 0.62 | 0.03 |
| A_51_P312268 | AK007938  | 1810062O1  | 175602 | RIKEN cDNA 1810062O18 gene                                                     | -3.00 | 0.62 | 0.02 |
| A_52_P676798 | AK052696  | Gigyf1     | 57330  | GRB10 interacting GYF protein 1                                                | -3.21 | 0.62 | 0.01 |
| A_52_P74715  | NA        | NA         | NA     | NA                                                                             | -3.94 | 0.62 | 0.00 |

|              |           |            |        |                                                    |       |      |      |
|--------------|-----------|------------|--------|----------------------------------------------------|-------|------|------|
| A_51_P210877 | NM_001024 | Pcnp       | 76302  | PEST proteolytic signal containing nuclear protein | -3.21 | 0.62 | 0.01 |
| A_51_P377526 | NM_009293 | Sts        | 20905  | steroid sulfatase                                  | -3.41 | 0.62 | 0.01 |
| A_51_P414706 | NM_010027 | Ddt        | 13202  | D-dopachrome tautomerase                           | -3.92 | 0.62 | 0.00 |
| A_52_P212429 | NM_008209 | Mr1        | 15064  | major histocompatibility complex, class I-related  | -3.93 | 0.62 | 0.00 |
| A_52_P242445 | NM_001024 | Fam149b    | 105428 | family with sequence similarity 149, member B      | -3.76 | 0.62 | 0.00 |
| A_52_P683441 | NM_007602 | Capn5      | 12337  | calpain 5                                          | -2.69 | 0.62 | 0.05 |
| A_52_P480709 | NM_009642 | Agtrap     | 11610  | angiotensin II, type I receptor-associated protein | -3.07 | 0.62 | 0.02 |
| A_52_P570240 | BC080858  | Kbtbd11    | 74901  | kelch repeat and BTB (POZ) domain containing 11    | -3.81 | 0.62 | 0.00 |
| A_52_P566390 | NM_001008 | Zfyve26    | 211978 | zinc finger, FYVE domain containing 26             | -2.64 | 0.62 | 0.07 |
| A_51_P386389 | NM_025914 | Actr6      | 67019  | ARP6 actin-related protein 6 homolog (yeast)       | -2.69 | 0.62 | 0.05 |
|              |           |            |        | SWI/SNF related matrix associated, actin dependent |       |      |      |
| A_51_P438293 | AK133701  | Smarcal1   | 54380  | regulator of chromatin, subfamily a-like 1         | -4.23 | 0.62 | 0.00 |
| A_52_P676589 | AK034561  | Fzd8       | 14370  | frizzled homolog 8 (Drosophila)                    | -3.12 | 0.62 | 0.01 |
| A_52_P134530 | AK152971  | Rbm47      | 245945 | RNA binding motif protein 47                       | -3.23 | 0.62 | 0.01 |
| A_51_P390628 | NM_146247 | BC024814   | 239706 | cDNA sequence BC024814                             | -3.29 | 0.62 | 0.01 |
| A_52_P561650 | NM_147776 | Vwa1       | 246228 | von Willebrand factor A domain containing 1        | -4.64 | 0.62 | 0.00 |
| A_51_P431831 | NM_020253 | Nrxn2      | 18190  | neurexin II                                        | -6.22 | 0.62 | 0.00 |
| A_51_P505868 | NM_175386 | Lhfp       | 108927 | lipoma HMGIC fusion partner                        | -2.64 | 0.62 | 0.07 |
| A_51_P368903 | NM_181394 | Anapc13    | 69010  | anaphase promoting complex subunit 13              | -3.46 | 0.62 | 0.01 |
| A_51_P417279 | AK002600  | 0610012G03 | 106264 | RIKEN cDNA 0610012G03 gene                         | -3.91 | 0.62 | 0.00 |
| A_52_P644479 | NM_001024 | NA         | NA     | NA                                                 | -2.61 | 0.62 | 0.07 |
| A_51_P423509 | NM_027980 | 2310003H01 | 71885  | RIKEN cDNA 2310003H01 gene                         | -3.02 | 0.62 | 0.02 |
| A_51_P107321 | NM_024188 | Oxct1      | 67041  | 3-oxoacid CoA transferase 1                        | -3.43 | 0.62 | 0.01 |
| A_51_P393934 | NM_007656 | Cd82       | 12521  | CD82 antigen                                       | -3.50 | 0.62 | 0.01 |
| A_51_P110689 | NM_009104 | Rrm2       | 20135  | ribonucleotide reductase M2                        | -2.72 | 0.62 | 0.05 |
| A_52_P234695 | XM_896388 | NA         | NA     | NA                                                 | -3.01 | 0.62 | 0.02 |
| A_52_P876207 | AK085773  | Arhgef15   | 442801 | Rho guanine nucleotide exchange factor (GEF) 15    | -3.87 | 0.62 | 0.00 |
| A_52_P467861 | NM_001039 | Prhoxnb    | 231903 | parahox cluster neighbor                           | -3.31 | 0.62 | 0.01 |
| A_52_P396774 | NM_001037 | 2700094K13 | 72657  | RIKEN cDNA 2700094K13 gene                         | -2.73 | 0.62 | 0.05 |
| A_51_P182174 | NM_019831 | Zmym3      | 56364  | zinc finger, MYM-type 3                            | -3.01 | 0.62 | 0.02 |
| A_51_P342387 | NM_013475 | Apoh       | 11818  | apolipoprotein H                                   | -4.63 | 0.62 | 0.00 |
| A_51_P507471 | AK010990  | 2510022D24 | 66567  | RIKEN cDNA 2510022D24 gene                         | -2.67 | 0.62 | 0.05 |

|               |           |           |        |                                                            |       |      |      |
|---------------|-----------|-----------|--------|------------------------------------------------------------|-------|------|------|
| A_51_P477414  | NM_026728 | Echdc2    | 52430  | enoyl Coenzyme A hydratase domain containing 2             | -3.83 | 0.62 | 0.00 |
| A_52_P33453   | NA        | NA        | NA     | NA                                                         | -2.79 | 0.62 | 0.04 |
| A_51_P151214  | NM_133882 | C8b       | 110382 | complement component 8, beta polypeptide                   | -2.80 | 0.62 | 0.04 |
| A_51_P508341  | NM_178608 | Reep1     | 52250  | receptor accessory protein 1                               | -4.05 | 0.62 | 0.00 |
| A_51_P259064  | AK020443  | Ube2d3    | 66105  | ubiquitin-conjugating enzyme E2D 3 (UBC4/5 homolog, yeast) | -3.41 | 0.62 | 0.01 |
| A_51_P452280  | NM_010839 | Mtcp1     | 17763  | mature T-cell proliferation 1                              | -3.14 | 0.62 | 0.01 |
| A_52_P674568  | BC066054  | BC024659  | 108934 | cDNA sequence BC024659                                     | -3.57 | 0.62 | 0.01 |
| A_51_P319141  | NM_023377 | Stard5    | 170460 | StAR-related lipid transfer (START) domain containing 5    | -4.10 | 0.62 | 0.00 |
| A_51_P480013  | NM_009800 | Car11     | 12348  | carbonic anhydrase 11                                      | -3.60 | 0.62 | 0.01 |
| A_52_P558368  | NM_175160 | Zdhhc1    | 70796  | zinc finger, DHHC domain containing 1                      | -2.92 | 0.62 | 0.03 |
| A_52_P314421  | AK047174  | Fbxo30    | 71865  | F-box protein 30                                           | -3.17 | 0.62 | 0.01 |
| A_52_P153291  | NM_145700 | Ccr1      | 252837 | chemokine (C-C motif) receptor-like 1                      | -2.70 | 0.61 | 0.05 |
| A_51_P361678  | NM_026599 | Cgnl1     | 68178  | cingulin-like 1                                            | -2.75 | 0.61 | 0.05 |
| A_52_P656418  | AK145182  | Met       | 17295  | met proto-oncogene                                         | -2.87 | 0.61 | 0.03 |
| A_52_P1055590 | NM_172149 | Bnip1     | 224630 | BCL2/adenovirus E1B interacting protein 1                  | -3.42 | 0.61 | 0.01 |
| A_51_P152612  | NM_023554 | Nol7      | 70078  | nucleolar protein 7                                        | -3.25 | 0.61 | 0.01 |
| A_51_P342082  | NM_019953 | Cnpy2     | 56530  | canopy 2 homolog (zebrafish)                               | -2.62 | 0.61 | 0.07 |
| A_52_P142154  | NM_024229 | Pcyt2     | 68671  | phosphate cytidylyltransferase 2, ethanolamine             | -3.59 | 0.61 | 0.01 |
| A_51_P224164  | NM_011867 | Slc26a4   | 23985  | solute carrier family 26, member 4                         | -2.67 | 0.61 | 0.05 |
| A_51_P498267  | NA        | NA        | NA     | NA                                                         | -3.62 | 0.61 | 0.00 |
| A_51_P442091  | AK122352  | Snx13     | 217463 | sorting nexin 13                                           | -2.74 | 0.61 | 0.05 |
| A_51_P504538  | NM_007919 | Cela2a    | 13706  | chymotrypsin-like elastase family, member 2A               | -3.08 | 0.61 | 0.02 |
| A_52_P471947  | NA        | NA        | NA     | NA                                                         | -2.65 | 0.61 | 0.06 |
| A_51_P256759  | NM_027855 | 0610007C2 | 381629 | RIKEN cDNA 0610007C21 gene                                 | -3.51 | 0.61 | 0.01 |
| A_51_P178938  | NM_134221 | V1ri4     | 171255 | vomer nasal 1 receptor, I4                                 | -2.67 | 0.61 | 0.05 |
| A_51_P279552  | NM_016900 | Cav2      | 12390  | caveolin 2                                                 | -3.19 | 0.61 | 0.01 |
| A_51_P313035  | AK052458  | Depdc5    | 277854 | DEP domain containing 5                                    | -2.99 | 0.61 | 0.02 |
| A_52_P541939  | NM_021527 | Mkks      | 59030  | McKusick-Kaufman syndrome protein                          | -3.10 | 0.61 | 0.02 |
| A_52_P128306  | NM_178723 | Zfp385b   | 241494 | zinc finger protein 385B                                   | -4.19 | 0.61 | 0.00 |
| A_52_P240152  | AK147452  | Snx27     | 76742  | sorting nexin family member 27                             | -2.75 | 0.61 | 0.05 |
| A_52_P323525  | NM_001003 | Arhgef11  | 213498 | Rho guanine nucleotide exchange factor (GEF) 11            | -3.15 | 0.61 | 0.01 |

|               |           |           |        |                                                       |       |      |      |
|---------------|-----------|-----------|--------|-------------------------------------------------------|-------|------|------|
| A_51_P138651  | NM_010562 | Ilk       | 16202  | integrin linked kinase                                | -2.73 | 0.61 | 0.05 |
|               |           |           |        | phosphatidylinositol-4-phosphate 5-kinase, type 1     |       |      |      |
| A_52_P271910  | AK122319  | Pip5k1c   | 18717  | gamma                                                 | -2.79 | 0.61 | 0.04 |
| A_51_P449911  | BC037217  | Cnot6     | 104625 | CCR4-NOT transcription complex, subunit 6             | -3.07 | 0.61 | 0.02 |
| A_52_P474249  | NM_011591 | Timm17b   | 21855  | translocase of inner mitochondrial membrane 17b       | -3.54 | 0.61 | 0.01 |
| A_52_P84275   | NM_033562 | Der12     | 116891 | Der1-like domain family, member 2                     | -2.79 | 0.61 | 0.04 |
| A_51_P251821  | NM_008507 | Sh2b3     | 16923  | SH2B adaptor protein 3                                | -3.87 | 0.61 | 0.00 |
| A_52_P174771  | NM_174874 | Atg4b     | 66615  | autophagy-related 4B (yeast)                          | -3.82 | 0.61 | 0.00 |
| A_51_P295797  | AK005616  | Ccdc30    | 73332  | coiled-coil domain containing 30                      | -2.91 | 0.61 | 0.03 |
| A_52_P327927  | NA        | NA        | NA     | NA                                                    | -3.61 | 0.61 | 0.00 |
| A_51_P116479  | NM_172582 | Coq6      | 217707 | coenzyme Q6 homolog (yeast)                           | -3.45 | 0.61 | 0.01 |
|               |           |           |        | tyrosine kinase with immunoglobulin-like and EGF-like |       |      |      |
| A_51_P177171  | NM_011587 | Tie1      | 21846  | domains 1                                             | -2.71 | 0.61 | 0.05 |
| A_52_P148428  | AK080940  | Nfix      | 18032  | nuclear factor I/X                                    | -2.88 | 0.61 | 0.03 |
| A_52_P1157176 | BB160563  | NA        | NA     | NA                                                    | -3.03 | 0.61 | 0.02 |
| A_52_P860515  | AK140295  | Dirc2     | 224132 | disrupted in renal carcinoma 2 (human)                | -4.67 | 0.61 | 0.00 |
| A_52_P357133  | NM_053267 | Selm      | 114679 | selenoprotein M                                       | -2.86 | 0.61 | 0.03 |
| A_52_P137371  | NM_008255 | Hmgcr     | 15357  | 3-hydroxy-3-methylglutaryl-Coenzyme A reductase       | -3.17 | 0.61 | 0.01 |
| A_52_P1036404 | AK045702  | 1810013D1 | 166278 | RIKEN cDNA 1810013D10 gene                            | -4.10 | 0.61 | 0.00 |
| A_51_P113003  | NM_031863 | Cenpq     | 83815  | centromere protein Q                                  | -3.91 | 0.61 | 0.00 |
| A_51_P372702  | NM_010551 | Il16      | 16170  | interleukin 16                                        | -4.86 | 0.61 | 0.00 |
| A_52_P332666  | NM_025770 | Atg10     | 66795  | autophagy-related 10 (yeast)                          | -4.14 | 0.61 | 0.00 |
| A_51_P137111  | NM_016681 | Chek2     | 50883  | CHK2 checkpoint homolog (S. pombe)                    | -3.80 | 0.61 | 0.00 |
| A_52_P659925  | NM_009752 | Glb1      | 12091  | galactosidase, beta 1                                 | -3.60 | 0.61 | 0.01 |
| A_52_P182450  | NM_021485 | Rps6kb2   | 58988  | ribosomal protein S6 kinase, polypeptide 2            | -2.81 | 0.61 | 0.04 |
| A_51_P433172  | AF116911  | Tmem59    | 56374  | transmembrane protein 59                              | -2.77 | 0.61 | 0.04 |
| A_51_P358152  | NM_029100 | Sepn1     | 74777  | selenoprotein N, 1                                    | -2.88 | 0.61 | 0.03 |
| A_52_P256757  | NM_144816 | Rhbdl1    | 214951 | rhomboid, veinlet-like 1 (Drosophila)                 | -4.12 | 0.61 | 0.00 |
| A_51_P103780  | NM_145512 | Sft2d2    | 108735 | SFT2 domain containing 2                              | -3.07 | 0.61 | 0.02 |
| A_51_P322531  | AK078234  | NA        | NA     | NA                                                    | -2.68 | 0.61 | 0.05 |
|               |           |           |        | solute carrier family 16 (monocarboxylic acid         |       |      |      |
| A_51_P493117  | NM_025807 | Slc16a9   | 66859  | transporters), member 9                               | -2.65 | 0.61 | 0.06 |

|              |           |           |        |                                                                                                    |       |      |      |
|--------------|-----------|-----------|--------|----------------------------------------------------------------------------------------------------|-------|------|------|
| A_52_P812648 | NA        | NA        | NA     | NA                                                                                                 | -3.35 | 0.61 | 0.01 |
| A_52_P494207 | AK046210  | Itpr2     | 16439  | inositol 1,4,5-triphosphate receptor 2                                                             | -2.83 | 0.61 | 0.03 |
| A_51_P500713 | NM_007832 | Dck       | 13178  | deoxycytidine kinase                                                                               | -3.23 | 0.61 | 0.01 |
| A_51_P285413 | NM_175023 | Rbbp6     | 19647  | retinoblastoma binding protein 6                                                                   | -3.01 | 0.61 | 0.02 |
| A_52_P576778 | NM_133718 | Tmem30a   | 69981  | transmembrane protein 30A                                                                          | -2.68 | 0.61 | 0.05 |
| A_52_P245059 | NM_197943 | Sgsm2     | 97761  | small G protein signaling modulator 2                                                              | -3.64 | 0.61 | 0.00 |
| A_52_P586062 | NA        | NA        | NA     | NA                                                                                                 | -2.96 | 0.61 | 0.02 |
| A_51_P311785 | NM_008550 | Man2b2    | 17160  | mannosidase 2, alpha B2                                                                            | -3.70 | 0.61 | 0.00 |
| A_51_P232371 | NM_138672 | Stab1     | 192187 | stabilin 1                                                                                         | -2.82 | 0.61 | 0.04 |
| A_51_P104012 | NM_001002 | Tmem158   | 72309  | transmembrane protein 158                                                                          | -2.60 | 0.61 | 0.07 |
| A_51_P519108 | AK078087  | 6330439K1 | 241688 | RIKEN cDNA 6330439K17 gene                                                                         | -2.75 | 0.61 | 0.05 |
| A_51_P289414 | BC019404  | Spg11     | 214585 | spastic paraplegia 11                                                                              | -3.55 | 0.61 | 0.01 |
| A_52_P448749 | AK053942  | Tc2n      | 74413  | tandem C2 domains, nuclear                                                                         | -3.61 | 0.61 | 0.01 |
| A_52_P551594 | NM_172952 | Gphn      | 268566 | gephyrin                                                                                           | -3.51 | 0.61 | 0.01 |
| A_51_P361286 | NM_026792 | Agpat5    | 52123  | 1-acylglycerol-3-phosphate O-acyltransferase 5<br>(lysophosphatidic acid acyltransferase, epsilon) | -2.69 | 0.61 | 0.05 |
| A_52_P446120 | NM_001033 | Commd6    | 66200  | COMM domain containing 6                                                                           | -3.32 | 0.61 | 0.01 |
| A_52_P519317 | NA        | NA        | NA     | NA                                                                                                 | -4.13 | 0.61 | 0.00 |
| A_51_P290819 | NM_025798 | Hint3     | 66847  | histidine triad nucleotide binding protein 3                                                       | -3.29 | 0.61 | 0.01 |
| A_51_P112932 | NM_009849 | Entpd2    | 12496  | ectonucleoside triphosphate diphosphohydrolase 2                                                   | -2.64 | 0.61 | 0.07 |
| A_52_P3214   | BC053524  | Ipo7      | 233726 | importin 7                                                                                         | -3.14 | 0.61 | 0.01 |
| A_51_P113403 | NM_178743 | Slc26a11  | 268512 | solute carrier family 26, member 11                                                                | -2.81 | 0.61 | 0.04 |
| A_51_P100866 | NM_016755 | Atp5j     | 11957  | ATP synthase, H <sup>+</sup> transporting, mitochondrial F0<br>complex, subunit F                  | -3.82 | 0.61 | 0.00 |
| A_52_P352277 | NM_016769 | Smad3     | 17127  | MAD homolog 3 (Drosophila)                                                                         | -2.61 | 0.61 | 0.07 |
| A_52_P397204 | NM_007783 | Csk       | 12988  | c-src tyrosine kinase                                                                              | -2.99 | 0.61 | 0.02 |
| A_51_P297470 | NM_025511 | Fam36a    | 66359  | family with sequence similarity 36, member A                                                       | -3.28 | 0.61 | 0.01 |
| A_52_P18229  | NM_146156 | Pdik1l    | 230809 | PDLIM1 interacting kinase 1 like                                                                   | -3.24 | 0.61 | 0.01 |
| A_52_P578732 | NM_009917 | Ccr5      | 12774  | chemokine (C-C motif) receptor 5                                                                   | -2.74 | 0.61 | 0.05 |
| A_52_P366980 | NM_028841 | Tspan17   | 74257  | tetraspanin 17                                                                                     | -3.05 | 0.61 | 0.02 |
| A_52_P225584 | NM_026185 | Abhd15    | 67477  | abhydrolase domain containing 15                                                                   | -2.97 | 0.61 | 0.02 |
| A_51_P332264 | NM_026314 | Dyx1c1    | 67685  | dyslexia susceptibility 1 candidate 1 homolog (human)                                              | -3.12 | 0.61 | 0.01 |



|              |           |            |        |                                                                                                               |       |      |      |
|--------------|-----------|------------|--------|---------------------------------------------------------------------------------------------------------------|-------|------|------|
| A_51_P330044 | NM_028979 | Cyp2j9     | 74519  | cytochrome P450, family 2, subfamily j, polypeptide 9                                                         | -2.75 | 0.61 | 0.05 |
| A_52_P571371 | NM_027495 | Tmem144    | 70652  | transmembrane protein 144                                                                                     | -2.92 | 0.61 | 0.03 |
| A_52_P408657 | NM_019660 | Mycbp      | 56309  | c-myc binding protein                                                                                         | -3.25 | 0.61 | 0.01 |
| A_51_P348617 | AK009829  | 2310045N01 | 72368  | RIKEN cDNA 2310045N01 gene                                                                                    | -2.78 | 0.61 | 0.04 |
| A_52_P322535 | NM_025479 | 2810021B07 | 66308  | RIKEN cDNA 2810021B07 gene                                                                                    | -2.70 | 0.61 | 0.05 |
| A_52_P128964 | NM_029342 | Nhej1      | 75570  | nonhomologous end-joining factor 1                                                                            | -2.92 | 0.61 | 0.03 |
| A_51_P491227 | NM_019879 | Suclg1     | 56451  | succinate-CoA ligase, GDP-forming, alpha subunit<br>transient receptor potential cation channel, subfamily C, | -3.69 | 0.61 | 0.00 |
| A_51_P317695 | NM_019510 | Trpc3      | 22065  | member 3                                                                                                      | -3.67 | 0.61 | 0.00 |
| A_51_P443569 | NM_023431 | Mum1       | 68114  | melanoma associated antigen (mutated) 1                                                                       | -3.37 | 0.61 | 0.01 |
| A_52_P475423 | NM_177678 | Ablim2     | 231148 | actin-binding LIM protein 2                                                                                   | -4.28 | 0.61 | 0.00 |
| A_51_P428754 | NM_008168 | Grik5      | 14809  | glutamate receptor, ionotropic, kainate 5 (gamma 2)<br>NADH dehydrogenase (ubiquinone) 1 beta subcomplex      | -4.31 | 0.61 | 0.00 |
| A_51_P434269 | NM_026610 | Ndufb4     | 68194  | 4                                                                                                             | -3.33 | 0.61 | 0.01 |
| A_51_P195215 | NM_153535 | Fam149a    | 212326 | family with sequence similarity 149, member A                                                                 | -3.35 | 0.61 | 0.01 |
| A_51_P257156 | NM_029832 | Ddrk1      | 77006  | DDRGK domain containing 1                                                                                     | -4.70 | 0.60 | 0.00 |
| A_52_P324042 | BC037008  | Serpina1b  | 20701  | serine (or cysteine) preptidase inhibitor, clade A,<br>member 1B                                              | -5.12 | 0.60 | 0.00 |
| A_51_P383841 | NM_029406 | Pih1d1     | 68845  | PIH1 domain containing 1                                                                                      | -4.44 | 0.60 | 0.00 |
| A_51_P184910 | NM_029293 | Phpt1      | 75454  | phosphohistidine phosphatase 1                                                                                | -3.34 | 0.60 | 0.01 |
| A_51_P230552 | NM_009053 | Rfng       | 19719  | RFNG O-fucosylpeptide 3-beta-N-<br>acetylglucosaminyltransferase                                              | -3.82 | 0.60 | 0.00 |
| A_51_P194999 | NM_027931 | Tars2      | 71807  | threonyl-tRNA synthetase 2, mitochondrial (putative)                                                          | -2.60 | 0.60 | 0.07 |
| A_52_P199928 | NA        | NA         | NA     | NA                                                                                                            | -3.01 | 0.60 | 0.02 |
| A_51_P419300 | NM_026549 | Pdcd2l     | 68079  | programmed cell death 2-like                                                                                  | -4.46 | 0.60 | 0.00 |
| A_52_P173526 | XM_287555 | Thsd7a     | 330267 | thrombospondin, type I, domain containing 7A                                                                  | -3.71 | 0.60 | 0.00 |
| A_51_P381784 | BC094932  | Exosc7     | 66446  | exosome component 7                                                                                           | -3.18 | 0.60 | 0.01 |
| A_52_P494686 | NM_177645 | 1110028C15 | 68691  | RIKEN cDNA 1110028C15 gene                                                                                    | -4.03 | 0.60 | 0.00 |
| A_51_P460143 | NM_015750 | Neu2       | 23956  | neuraminidase 2                                                                                               | -2.61 | 0.60 | 0.07 |
| A_51_P317505 | NM_008673 | Nat1       | 17960  | N-acetyl transferase 1                                                                                        | -3.27 | 0.60 | 0.01 |

|              |           |                  |        |                                                             |       |      |      |
|--------------|-----------|------------------|--------|-------------------------------------------------------------|-------|------|------|
| A_51_P345593 | NM_009269 | Sptlc1           | 268656 | serine palmitoyltransferase, long chain base subunit 1      | -3.95 | 0.60 | 0.00 |
| A_52_P565427 | NM_001039 | Myo6             | 17920  | myosin VI                                                   | -3.97 | 0.60 | 0.00 |
| A_51_P402435 | NM_026508 | Trap1            | 68015  | TNF receptor-associated protein 1                           | -3.35 | 0.60 | 0.01 |
| A_51_P105445 | NM_133774 | Stard4           | 170459 | StAR-related lipid transfer (START) domain containing 4     | -2.79 | 0.60 | 0.04 |
| A_51_P268754 | NM_178666 | Themis           | 210757 | thymocyte selection associated                              | -3.57 | 0.60 | 0.01 |
| A_51_P345159 | NM_026024 | Ube2t            | 67196  | ubiquitin-conjugating enzyme E2T (putative)                 | -3.48 | 0.60 | 0.01 |
| A_51_P401958 | NM_011528 | Taldo1           | 21351  | transaldolase 1                                             | -4.74 | 0.60 | 0.00 |
| A_52_P683225 | AK039665  | Taok3            | 330177 | TAO kinase 3                                                | -3.25 | 0.60 | 0.01 |
| A_51_P462516 | NM_001003 | Senp7            | 66315  | SUMO1/sentrin specific peptidase 7                          | -3.42 | 0.60 | 0.01 |
| A_51_P109888 | NM_011778 | Coro1b           | 23789  | coronin, actin binding protein 1B                           | -3.59 | 0.60 | 0.01 |
| A_52_P75985  | NM_025808 | Lztr1            | 66863  | leucine-zipper-like transcriptional regulator, 1            | -2.84 | 0.60 | 0.03 |
| A_51_P406334 | NM_026828 | Dnlz             | 52838  | DNL-type zinc finger                                        | -2.96 | 0.60 | 0.02 |
| A_51_P237613 | NM_008010 | Fgfr3            | 14184  | fibroblast growth factor receptor 3                         | -4.18 | 0.60 | 0.00 |
| A_51_P460844 | NM_144923 | Blvrb            | 233016 | biliverdin reductase B (flavin reductase (NADPH))           | -2.99 | 0.60 | 0.02 |
| A_51_P169047 | NM_019551 | Ttrap            | 56196  | TRAF and TNF receptor associated protein                    | -5.15 | 0.60 | 0.00 |
| A_51_P481293 | NM_026949 | Cnot8            | 69125  | CCR4-NOT transcription complex, subunit 8                   | -2.65 | 0.60 | 0.06 |
| A_52_P724940 | NM_025551 | Ndufa12          | 66414  | NADH dehydrogenase (ubiquinone) 1 alpha subcomplex, 12      | -4.65 | 0.60 | 0.00 |
| A_52_P177341 | NM_197980 | Cox19            | 68033  | COX19 cytochrome c oxidase assembly homolog (S. cerevisiae) | -2.84 | 0.60 | 0.03 |
| A_52_P422222 | NM_024274 | Fars2            | 69955  | phenylalanine-tRNA synthetase 2 (mitochondrial)             | -3.82 | 0.60 | 0.00 |
| A_52_P601996 | AK018254  | Fbxl17           | 50758  | F-box and leucine-rich repeat protein 17                    | -3.72 | 0.60 | 0.00 |
| A_51_P502132 | NM_011985 | Mmp23            | 26561  | matrix metalloproteinase 23                                 | -5.54 | 0.60 | 0.00 |
| A_52_P623058 | NM_177994 | C030046I0:109284 |        | RIKEN cDNA C030046I01 gene                                  | -2.84 | 0.60 | 0.03 |
| A_52_P69702  | NM_025348 | Ndufa3           | 66091  | NADH dehydrogenase (ubiquinone) 1 alpha subcomplex, 3       | -4.41 | 0.60 | 0.00 |
| A_52_P655221 | AK042768  | NA               | NA     | NA                                                          | -3.47 | 0.60 | 0.01 |
| A_52_P290434 | AK051849  | Fbxl7            | 448987 | F-box and leucine-rich repeat protein 7                     | -4.31 | 0.60 | 0.00 |
| A_52_P447985 | NM_023217 | Pgpep1           | 66522  | pyroglutamyl-peptidase I                                    | -3.70 | 0.60 | 0.00 |
| A_51_P312528 | NM_020004 | Kat2a            | 14534  | K(lysine) acetyltransferase 2A                              | -2.93 | 0.60 | 0.02 |

|              |           |           |        |                                                                  |       |      |      |
|--------------|-----------|-----------|--------|------------------------------------------------------------------|-------|------|------|
| A_52_P678895 | NM_025975 | Dynlt3    | 67117  | dynein light chain Tctex-type 3                                  | -3.24 | 0.60 | 0.01 |
| A_51_P396818 | NM_025577 | 2810428I1 | 66462  | RIKEN cDNA 2810428I15 gene                                       | -3.94 | 0.60 | 0.00 |
| A_52_P153925 | NM_013862 | Rabgap1l  | 29809  | RAB GTPase activating protein 1-like                             | -3.37 | 0.60 | 0.01 |
| A_51_P462311 | NM_023422 | Hist1h2bc | 68024  | histone cluster 1, H2bc                                          | -2.63 | 0.60 | 0.07 |
| A_52_P496596 | NM_007597 | Canx      | 12330  | calnexin                                                         | -3.41 | 0.60 | 0.01 |
| A_52_P292651 | NM_021288 | Tyms      | 22171  | thymidylate synthase                                             | -2.99 | 0.60 | 0.02 |
| A_51_P144134 | NM_027572 | Slc22a16  | 70840  | solute carrier family 22 (organic cation transporter), member 16 | -2.62 | 0.60 | 0.07 |
| A_52_P91823  | AK045070  | B130024G1 | 434198 | RIKEN cDNA B130024G19 gene                                       | -4.63 | 0.60 | 0.00 |
| A_51_P182131 | NM_001033 | 5330417C2 | 229722 | RIKEN cDNA 5330417C22 gene                                       | -2.68 | 0.60 | 0.05 |
| A_52_P542970 | XR_002670 | NA        | NA     | NA                                                               | -4.42 | 0.60 | 0.00 |
| A_52_P377532 | NM_178035 | Fads6     | 328035 | fatty acid desaturase domain family, member 6                    | -4.70 | 0.60 | 0.00 |
| A_52_P248250 | NM_028844 | Aven      | 74268  | apoptosis, caspase activation inhibitor                          | -4.31 | 0.60 | 0.00 |
| A_52_P504787 | NM_010141 | Epha7     | 13841  | Eph receptor A7                                                  | -3.67 | 0.60 | 0.00 |
| A_52_P60105  | NM_018822 | Sgsh      | 27029  | N-sulfoglucosamine sulfohydrolase (sulfamidase)                  | -3.03 | 0.60 | 0.02 |
| A_51_P380685 | NM_023231 | Stoml2    | 66592  | stomatin (Epb7.2)-like 2                                         | -3.72 | 0.60 | 0.00 |
| A_51_P156902 | NM_025336 | Chchd3    | 66075  | coiled-coil-helix-coiled-coil-helix domain containing 3          | -3.24 | 0.60 | 0.01 |
| A_51_P250445 | NM_020497 | Zfp276    | 57247  | zinc finger protein (C2H2 type) 276                              | -4.35 | 0.60 | 0.00 |
| A_52_P299535 | NM_134117 | Pkdcc     | 106522 | protein kinase domain containing, cytoplasmic                    | -2.64 | 0.60 | 0.06 |
| A_52_P253230 | NM_175134 | Ankrd46   | 68839  | ankyrin repeat domain 46                                         | -2.74 | 0.60 | 0.05 |
| A_52_P438508 | NA        | NA        | NA     | NA                                                               | -2.95 | 0.60 | 0.02 |
| A_51_P387248 | NM_134135 | Slc39a3   | 106947 | solute carrier family 39 (zinc transporter), member 3            | -4.08 | 0.60 | 0.00 |
| A_51_P370252 | NM_011796 | Capn10    | 23830  | calpain 10                                                       | -4.61 | 0.60 | 0.00 |
| A_51_P256246 | NM_025359 | Tspan13   | 66109  | tetraspanin 13                                                   | -2.90 | 0.60 | 0.03 |
| A_51_P381360 | NM_023312 | Ndufa13   | 67184  | NADH dehydrogenase (ubiquinone) 1 alpha subcomplex, 13           | -5.84 | 0.60 | 0.00 |
| A_52_P263658 | NM_008236 | Hes2      | 15206  | hairly and enhancer of split 2 (Drosophila)                      | -2.71 | 0.60 | 0.05 |
| A_51_P352076 | NM_008399 | Itgae     | 16407  | integrin alpha E, epithelial-associated                          | -4.52 | 0.60 | 0.00 |
| A_52_P100242 | NM_026510 | Ftsj2     | 68017  | FtsJ homolog 2 (E. coli)                                         | -3.49 | 0.60 | 0.01 |
| A_52_P210338 | NM_001033 | Ndufb6    | 230075 | NADH dehydrogenase (ubiquinone) 1 beta subcomplex, 6             | -3.60 | 0.60 | 0.01 |

|              |           |           |        |                                                                               |       |      |      |
|--------------|-----------|-----------|--------|-------------------------------------------------------------------------------|-------|------|------|
| A_52_P328304 | NM_153804 | Plekhg3   | 263406 | pleckstrin homology domain containing, family G (with RhoGef domain) member 3 | -2.80 | 0.60 | 0.04 |
| A_52_P267717 | NM_001037 | Cd209b    | 69165  | CD209b antigen                                                                | -4.69 | 0.60 | 0.00 |
| A_52_P215701 | AK133756  | Acp2      | 11432  | acid phosphatase 2, lysosomal                                                 | -2.87 | 0.60 | 0.03 |
| A_51_P330226 | NM_025901 | Polr3k    | 67005  | polymerase (RNA) III (DNA directed) polypeptide K                             | -2.70 | 0.60 | 0.05 |
| A_51_P399062 | NM_027777 | Pex1      | 71382  | peroxisomal biogenesis factor 1                                               | -2.70 | 0.60 | 0.05 |
| A_51_P298052 | NM_153571 | Hscb      | 100900 | HscB iron-sulfur cluster co-chaperone homolog (E. coli)                       | -2.78 | 0.60 | 0.04 |
| A_51_P155303 | NM_199197 | 1110032A1 | 168731 | RIKEN cDNA 1110032A13 gene                                                    | -3.08 | 0.60 | 0.02 |
| A_51_P296100 | NM_145999 | Rhot2     | 214952 | ras homolog gene family, member T2                                            | -3.32 | 0.60 | 0.01 |
| A_52_P596086 | NM_028014 | 2310067B1 | 171947 | RIKEN cDNA 2310067B10 gene                                                    | -3.22 | 0.60 | 0.01 |
| A_52_P295012 | NM_199313 | Rdh18     | 380674 | retinol dehydrogenase 18                                                      | -2.77 | 0.60 | 0.04 |
| A_51_P220407 | NM_181405 | Rnpepl1   | 108657 | arginyl aminopeptidase (aminopeptidase B)-like 1                              | -3.94 | 0.59 | 0.00 |
| A_52_P298053 | AK038653  | NA        | NA     | NA                                                                            | -3.05 | 0.59 | 0.02 |
| A_52_P194289 | AK166886  | lqsec1    | 232227 | IQ motif and Sec7 domain 1                                                    | -3.16 | 0.59 | 0.01 |
| A_52_P595140 | NM_198030 | Hsd17b13  | 243168 | hydroxysteroid (17-beta) dehydrogenase 13                                     | -2.67 | 0.59 | 0.05 |
| A_51_P249313 | NM_028705 | Herc3     | 73998  | hect domain and RLD 3                                                         | -2.70 | 0.59 | 0.05 |
| A_52_P347500 | BC035276  | Ttll5     | 320244 | tubulin tyrosine ligase-like family, member 5                                 | -4.52 | 0.59 | 0.00 |
| A_52_P569276 | NM_001003 | Masp2     | 17175  | mannan-binding lectin serine peptidase 2                                      | -3.37 | 0.59 | 0.01 |
| A_52_P183138 | NM_008668 | Nab2      | 17937  | Ngfi-A binding protein 2                                                      | -2.67 | 0.59 | 0.05 |
| A_52_P232470 | NM_001009 | Smcr7     | 237781 | Smith-Magenis syndrome chromosome region, candidate 7 homolog (human)         | -4.44 | 0.59 | 0.00 |
| A_51_P117236 | NM_009329 | Zfp354a   | 21408  | zinc finger protein 354A                                                      | -3.07 | 0.59 | 0.02 |
| A_51_P456721 | NM_013478 | Azgp1     | 12007  | alpha-2-glycoprotein 1, zinc                                                  | -4.00 | 0.59 | 0.00 |
| A_51_P155747 | NM_028776 | Scyl3     | 240880 | SCY1-like 3 (S. cerevisiae)                                                   | -4.06 | 0.59 | 0.00 |
| A_52_P218379 | XM_138275 | NA        | NA     | NA                                                                            | -4.69 | 0.59 | 0.00 |
| A_51_P506761 | NM_009351 | Tep1      | 21745  | telomerase associated protein 1                                               | -2.80 | 0.59 | 0.04 |
| A_51_P308961 | NM_008254 | Hmgcl     | 15356  | 3-hydroxy-3-methylglutaryl-Coenzyme A lyase                                   | -3.07 | 0.59 | 0.02 |
| A_52_P595561 | NM_133924 | Snx21     | 101113 | sorting nexin family member 21                                                | -4.44 | 0.59 | 0.00 |
| A_51_P183912 | NM_016671 | Il27ra    | 50931  | interleukin 27 receptor, alpha                                                | -4.09 | 0.59 | 0.00 |
| A_52_P651942 | NM_026982 | 1810027O1 | 169186 | RIKEN cDNA 1810027O10 gene                                                    | -3.83 | 0.59 | 0.00 |
| A_51_P188373 | NM_009287 | Stim1     | 20866  | stromal interaction molecule 1                                                | -2.74 | 0.59 | 0.05 |

|              |           |           |        |                                                                                                   |       |      |      |
|--------------|-----------|-----------|--------|---------------------------------------------------------------------------------------------------|-------|------|------|
| A_51_P399477 | AK143126  | Dennd5b   | 320560 | DENN/MADD domain containing 5B                                                                    | -4.38 | 0.59 | 0.00 |
| A_52_P296810 | NM_009030 | Rbbp4     | 19646  | retinoblastoma binding protein 4                                                                  | -2.95 | 0.59 | 0.02 |
| A_51_P260178 | NM_058214 | Recql4    | 79456  | RecQ protein-like 4                                                                               | -5.50 | 0.59 | 0.00 |
| A_51_P440399 | NM_012060 | Bcap31    | 27061  | B-cell receptor-associated protein 31                                                             | -3.55 | 0.59 | 0.01 |
| A_51_P430202 | NM_175380 | Gpd1l     | 333433 | glycerol-3-phosphate dehydrogenase 1-like                                                         | -3.95 | 0.59 | 0.00 |
| A_51_P384402 | NM_019454 | Dll4      | 54485  | delta-like 4 (Drosophila)                                                                         | -4.70 | 0.59 | 0.00 |
| A_51_P111285 | V00830    | Krt10     | 16661  | keratin 10                                                                                        | -3.55 | 0.59 | 0.01 |
| A_51_P501815 | NM_026914 | 1500032L2 | 69029  | RIKEN cDNA 1500032L24 gene                                                                        | -3.61 | 0.59 | 0.00 |
| A_52_P400613 | NM_176842 | Tprkb     | 69786  | Tp53rk binding protein                                                                            | -3.40 | 0.59 | 0.01 |
| A_51_P191865 | U12147    | Lama2     | 16773  | laminin, alpha 2                                                                                  | -4.18 | 0.59 | 0.00 |
| A_52_P335259 | NM_144536 | Cdkal1    | 68916  | CDK5 regulatory subunit associated protein 1-like 1                                               | -3.31 | 0.59 | 0.01 |
| A_51_P258894 | NM_018763 | Chst2     | 54371  | carbohydrate sulfotransferase 2                                                                   | -4.15 | 0.59 | 0.00 |
| A_52_P276727 | AK033699  | Lgr4      | 107515 | leucine-rich repeat-containing G protein-coupled receptor 4                                       | -3.66 | 0.59 | 0.00 |
| A_51_P117432 | AK172893  | Ube4a     | 140630 | ubiquitination factor E4A, UFD2 homolog ( <i>S. cerevisiae</i> )                                  | -2.96 | 0.59 | 0.02 |
| A_52_P652704 | NM_011020 | Hspa4l    | 18415  | heat shock protein 4 like                                                                         | -3.49 | 0.59 | 0.01 |
| A_51_P284898 | NM_011418 | Smarcb1   | 20587  | SWI/SNF related, matrix associated, actin dependent regulator of chromatin, subfamily b, member 1 | -2.61 | 0.59 | 0.07 |
| A_51_P261131 | AK084367  | NA        | NA     | NA                                                                                                | -3.14 | 0.59 | 0.01 |
| A_51_P437737 | NM_020046 | Dhodh     | 56749  | dihydroorotate dehydrogenase                                                                      | -2.64 | 0.59 | 0.06 |
| A_51_P118650 | NM_031392 | Wdr6      | 83669  | WD repeat domain 6                                                                                | -3.67 | 0.59 | 0.00 |
| A_52_P229316 | NM_015737 | Galnt4    | 14426  | UDP-N-acetyl-alpha-D-galactosamine:polypeptide N-acetylgalactosaminyltransferase 4                | -2.66 | 0.59 | 0.06 |
| A_51_P156547 | NM_001079 | Tcf7l1    | 21415  | transcription factor 7-like 1 (T-cell specific, HMG box)                                          | -2.90 | 0.59 | 0.03 |
| A_51_P491916 | NM_028478 | Rassf6    | 73246  | Ras association (RalGDS/AF-6) domain family member 6                                              | -3.90 | 0.59 | 0.00 |
| A_52_P534844 | NM_001038 | Atp8a1    | 11980  | ATPase, aminophospholipid transporter (APLT), class I, type 8A, member 1                          | -3.62 | 0.59 | 0.00 |
| A_52_P568792 | NM_024221 | Pdhb      | 68263  | pyruvate dehydrogenase (lipoamide) beta                                                           | -3.96 | 0.59 | 0.00 |

|              |           |           |        |                                                                                             |       |      |      |
|--------------|-----------|-----------|--------|---------------------------------------------------------------------------------------------|-------|------|------|
| A_51_P106259 | NM_133926 | Camk1     | 52163  | calcium/calmodulin-dependent protein kinase I                                               | -2.98 | 0.59 | 0.02 |
| A_52_P656024 | NM_022432 | Sirt2     | 64383  | sirtuin 2 (silent mating type information regulation 2, homolog) 2 ( <i>S. cerevisiae</i> ) | -4.70 | 0.59 | 0.00 |
| A_51_P333923 | NM_133681 | Tspan1    | 66805  | tetraspanin 1                                                                               | -2.84 | 0.59 | 0.03 |
| A_51_P454234 | AK154409  | 130001811 | 72325  | RIKEN cDNA 1300018117 gene                                                                  | -3.50 | 0.59 | 0.01 |
| A_51_P131175 | NM_013569 | Kcnh2     | 16511  | potassium voltage-gated channel, subfamily H (eag-related), member 2                        | -2.79 | 0.59 | 0.04 |
| A_52_P34043  | NM_011151 | Ppm1b     | 19043  | protein phosphatase 1B, magnesium dependent, beta isoform                                   | -5.19 | 0.59 | 0.00 |
| A_51_P298997 | NM_177266 | Gfm2      | 320806 | G elongation factor, mitochondrial 2                                                        | -3.30 | 0.59 | 0.01 |
| A_51_P187665 | NM_028904 | Rmi1      | 74386  | RMI1, RecQ mediated genome instability 1, homolog ( <i>S. cerevisiae</i> )                  | -3.84 | 0.59 | 0.00 |
| A_52_P274810 | XM_130232 | Neb       | 17996  | nebulin                                                                                     | -3.40 | 0.59 | 0.01 |
| A_52_P324986 | NM_009275 | Srprb     | 20818  | signal recognition particle receptor, B subunit                                             | -3.96 | 0.59 | 0.00 |
| A_51_P160913 | NM_008209 | Mr1       | 15064  | major histocompatibility complex, class I-related                                           | -4.42 | 0.59 | 0.00 |
| A_52_P112139 | NM_199302 | Lrsam1    | 227738 | leucine rich repeat and sterile alpha motif containing 1                                    | -3.33 | 0.59 | 0.01 |
| A_52_P556082 | AK046928  | Trmt2b    | 215201 | TRM2 tRNA methyltransferase 2 homolog B ( <i>S. cerevisiae</i> )                            | -2.71 | 0.59 | 0.05 |
| A_52_P205797 | NM_177683 | Vgll4     | 232334 | vestigial like 4 ( <i>Drosophila</i> )                                                      | -3.40 | 0.59 | 0.01 |
| A_51_P236267 | NM_009183 | St8sia4   | 20452  | ST8 alpha-N-acetyl-neuraminide alpha-2,8-sialyltransferase 4                                | -3.15 | 0.59 | 0.01 |
| A_51_P379399 | NM_172117 | Entpd6    | 12497  | ectonucleoside triphosphate diphosphohydrolase 6                                            | -2.63 | 0.59 | 0.07 |
| A_51_P520802 | NM_145536 | BC020535  | 228788 | cDNA sequence BC020535                                                                      | -2.82 | 0.59 | 0.04 |
| A_52_P542496 | NM_130861 | Slco1a5   | 108096 | solute carrier organic anion transporter family, member 1a5                                 | -2.94 | 0.59 | 0.02 |
| A_51_P283083 | NM_028840 | Armc1     | 74252  | armadillo repeat containing 1                                                               | -2.92 | 0.59 | 0.03 |
| A_51_P251433 | NM_023831 | 1500035HC | 76568  | RIKEN cDNA 1500035H01 gene                                                                  | -2.91 | 0.59 | 0.03 |
| A_51_P331431 | NM_177756 | Glt25d2   | 269132 | glycosyltransferase 25 domain containing 2                                                  | -2.89 | 0.59 | 0.03 |
| A_52_P196105 | NM_175274 | Ttyh3     | 78339  | tweety homolog 3 ( <i>Drosophila</i> )                                                      | -3.18 | 0.59 | 0.01 |
| A_51_P336391 | NM_172049 | Tmem18    | 211986 | transmembrane protein 18                                                                    | -2.72 | 0.59 | 0.05 |
| A_51_P308017 | NM_172149 | Bnip1     | 224630 | BCL2/adenovirus E1B interacting protein 1                                                   | -4.19 | 0.59 | 0.00 |
| A_52_P234039 | XM_893176 | NA        | NA     | NA                                                                                          | -3.41 | 0.59 | 0.01 |

|              |           |           |        |                                                                |       |      |      |
|--------------|-----------|-----------|--------|----------------------------------------------------------------|-------|------|------|
| A_52_P97192  | NM_026170 | Ergic1    | 67458  | endoplasmic reticulum-golgi intermediate compartment (ERGIC) 1 | -3.39 | 0.59 | 0.01 |
| A_51_P483081 | AK165218  | Lpin2     | 64898  | lipin 2                                                        | -2.63 | 0.59 | 0.07 |
| A_52_P507310 | NM_026080 | Mrps24    | 64660  | mitochondrial ribosomal protein S24                            | -3.79 | 0.59 | 0.00 |
| A_51_P483488 | NM_029020 | Abcb8     | 74610  | ATP-binding cassette, sub-family B (MDR/TAP), member 8         | -3.23 | 0.59 | 0.01 |
| A_52_P414645 | NM_001002 | Gpr126    | 215798 | G protein-coupled receptor 126                                 | -4.43 | 0.59 | 0.00 |
| A_51_P477285 | AK090016  | 1810014B0 | 66263  | RIKEN cDNA 1810014B01 gene                                     | -2.96 | 0.59 | 0.02 |
| A_52_P48670  | NM_025366 | Chchd1    | 66121  | coiled-coil-helix-coiled-coil-helix domain containing 1        | -3.71 | 0.59 | 0.00 |
| A_51_P289506 | AK151780  | Dis3l     | 213550 | DIS3 mitotic control homolog ( <i>S. cerevisiae</i> )-like     | -2.87 | 0.59 | 0.03 |
| A_52_P189132 | DV054273  | Thap1     | 73754  | THAP domain containing, apoptosis associated protein 1         | -3.39 | 0.59 | 0.01 |
| A_52_P542612 | NM_010144 | Ephb4     | 13846  | Eph receptor B4                                                | -3.87 | 0.58 | 0.00 |
| A_52_P459929 | NM_001033 | Itga1     | 109700 | integrin alpha 1                                               | -2.83 | 0.58 | 0.04 |
| A_51_P339344 | NM_029025 | Tmem81    | 74626  | transmembrane protein 81                                       | -3.35 | 0.58 | 0.01 |
| A_51_P468037 | NM_026698 | Tmem129   | 68366  | transmembrane protein 129                                      | -3.40 | 0.58 | 0.01 |
| A_51_P216313 | NM_153794 | 4933403F0 | 108654 | RIKEN cDNA 4933403F05 gene                                     | -2.62 | 0.58 | 0.07 |
| A_51_P495700 | NM_025455 | Ccdc28b   | 66264  | coiled coil domain containing 28B                              | -3.89 | 0.58 | 0.00 |
| A_51_P285844 | NM_011680 | Usf2      | 22282  | upstream transcription factor 2                                | -4.10 | 0.58 | 0.00 |
| A_51_P322994 | NM_175001 | Mrpl22    | 216767 | mitochondrial ribosomal protein L22                            | -3.99 | 0.58 | 0.00 |
| A_51_P393671 | BC024498  | Tm6sf2    | 107770 | transmembrane 6 superfamily member 2                           | -3.51 | 0.58 | 0.01 |
| A_51_P102782 | NM_199195 | Bckdhb    | 12040  | branched chain ketoacid dehydrogenase E1, beta polypeptide     | -2.64 | 0.58 | 0.07 |
| A_51_P214916 | NM_001030 | Ndufs5    | 595136 | NADH dehydrogenase (ubiquinone) Fe-S protein 5                 | -4.47 | 0.58 | 0.00 |
| A_51_P226429 | NM_153514 | Rhobtb2   | 246710 | Rho-related BTB domain containing 2                            | -4.29 | 0.58 | 0.00 |
| A_51_P383857 | NM_031499 | Prp2      | 83380  | proline rich protein 2                                         | -3.73 | 0.58 | 0.00 |
| A_51_P489108 | NM_153391 | Wdr19     | 213081 | WD repeat domain 19                                            | -3.66 | 0.58 | 0.00 |
| A_52_P354390 | NM_013670 | Snrpn     | 20646  | small nuclear ribonucleoprotein N                              | -2.67 | 0.58 | 0.05 |
| A_52_P597464 | NA        | NA        | NA     | NA                                                             | -2.63 | 0.58 | 0.07 |
| A_51_P293087 | NM_008606 | Mmp11     | 17385  | matrix metalloproteinase 11                                    | -3.50 | 0.58 | 0.01 |
| A_52_P398334 | NM_177616 | Ccdc157   | 216516 | coiled-coil domain containing 157                              | -5.43 | 0.58 | 0.00 |

|              |           |          |        |                                                                                      |       |      |      |
|--------------|-----------|----------|--------|--------------------------------------------------------------------------------------|-------|------|------|
| A_51_P168171 | NM_024168 | Tsen34   | 66078  | tRNA splicing endonuclease 34 homolog ( <i>S. cerevisiae</i> )                       | -3.29 | 0.58 | 0.01 |
| A_51_P207751 | NM_008189 | Guca1a   | 14913  | guanylate cyclase activator 1a (retina)                                              | -2.60 | 0.58 | 0.07 |
| A_51_P448671 | NM_011539 | Tbxas1   | 21391  | thromboxane A synthase 1, platelet                                                   | -3.13 | 0.58 | 0.01 |
| A_51_P362054 | NM_025983 | Atp5e    | 67126  | ATP synthase, H <sup>+</sup> transporting, mitochondrial F1 complex, epsilon subunit | -4.24 | 0.58 | 0.00 |
| A_52_P635984 | NM_001038 | Anapc11  | 66156  | anaphase promoting complex subunit 11                                                | -4.69 | 0.58 | 0.00 |
| A_52_P51355  | NM_008855 | Prkcb    | 18751  | protein kinase C, beta                                                               | -5.16 | 0.58 | 0.00 |
| A_51_P233396 | NM_009358 | Ppp2r5d  | 21770  | protein phosphatase 2, regulatory subunit B (B56), delta isoform                     | -3.88 | 0.58 | 0.00 |
| A_51_P494342 | NM_212457 | Bex4     | 406217 | brain expressed gene 4                                                               | -3.03 | 0.58 | 0.02 |
| A_51_P296905 | XM_896000 | Ppat     | 231327 | phosphoribosyl pyrophosphate amidotransferase                                        | -3.20 | 0.58 | 0.01 |
| A_51_P474431 | NM_023117 | Cdc25b   | 12531  | cell division cycle 25 homolog B ( <i>S. pombe</i> )                                 | -4.11 | 0.58 | 0.00 |
| A_51_P124934 | AK031219  | NA       | NA     | NA                                                                                   | -4.62 | 0.58 | 0.00 |
| A_52_P8685   | NM_020588 | Tmem183a | 57439  | transmembrane protein 183A                                                           | -3.28 | 0.58 | 0.01 |
| A_51_P376321 | NM_145828 | Xylt2    | 217119 | xylosyltransferase II                                                                | -3.23 | 0.58 | 0.01 |
| A_52_P346706 | NM_009658 | Akr1b3   | 11677  | aldo-keto reductase family 1, member B3 (aldose reductase)                           | -3.44 | 0.58 | 0.01 |
| A_52_P78373  | NM_011366 | Sorbs3   | 20410  | sorbin and SH3 domain containing 3                                                   | -5.41 | 0.58 | 0.00 |
| A_52_P657844 | AK038731  | Zbtb20   | 56490  | zinc finger and BTB domain containing 20                                             | -4.65 | 0.58 | 0.00 |
| A_51_P305547 | NM_011415 | Snai2    | 20583  | snail homolog 2 ( <i>Drosophila</i> )                                                | -2.95 | 0.58 | 0.02 |
| A_51_P316103 | NM_023063 | Lima1    | 65970  | LIM domain and actin binding 1                                                       | -2.97 | 0.58 | 0.02 |
| A_52_P305748 | NM_025439 | Tmem9    | 66241  | transmembrane protein 9                                                              | -3.70 | 0.58 | 0.00 |
| A_51_P202596 | NM_172628 | Sh3tc2   | 225608 | SH3 domain and tetratricopeptide repeats 2                                           | -3.55 | 0.58 | 0.01 |
| A_52_P294253 | NM_011759 | Zfp41    | 22701  | zinc finger protein 41                                                               | -4.07 | 0.58 | 0.00 |
| A_52_P545010 | NM_027216 | Slc39a11 | 69806  | solute carrier family 39 (metal ion transporter), member 11                          | -2.73 | 0.58 | 0.05 |
| A_51_P320190 | XM_128010 | NA       | NA     | NA                                                                                   | -2.65 | 0.58 | 0.06 |
| A_52_P350664 | NM_153781 | Pygb     | 110078 | brain glycogen phosphorylase                                                         | -3.53 | 0.58 | 0.01 |
| A_52_P400637 | BB661265  | NA       | NA     | NA                                                                                   | -2.67 | 0.58 | 0.05 |
| A_52_P346256 | NM_027275 | Ptcd3    | 69956  | pentatricopeptide repeat domain 3                                                    | -2.66 | 0.58 | 0.06 |
| A_51_P267671 | NM_030251 | Abtb1    | 80283  | ankyrin repeat and BTB (POZ) domain containing 1                                     | -3.53 | 0.58 | 0.01 |



|              |           |           |        |                                                                                     |       |      |      |
|--------------|-----------|-----------|--------|-------------------------------------------------------------------------------------|-------|------|------|
| A_52_P319123 | XM_986525 | Vps13b    | 666173 | vacuolar protein sorting 13B (yeast)                                                | -3.52 | 0.58 | 0.01 |
| A_51_P483301 | NM_177256 | Prdx6-rs1 | 320769 | peroxiredoxin 6, related sequence 1                                                 | -4.59 | 0.58 | 0.00 |
| A_52_P459732 | NM_020002 | Rec8      | 56739  | REC8 homolog (yeast)                                                                | -3.64 | 0.58 | 0.00 |
| A_52_P314181 | AK040606  | NA        | NA     | NA                                                                                  | -3.04 | 0.58 | 0.02 |
| A_51_P303180 | NM_026667 | Fam114a1  | 68303  | family with sequence similarity 114, member A1                                      | -3.11 | 0.58 | 0.01 |
| A_52_P332898 | BB554159  | NA        | NA     | NA                                                                                  | -3.22 | 0.58 | 0.01 |
| A_51_P290526 | NM_011994 | Abcd2     | 26874  | ATP-binding cassette, sub-family D (ALD), member 2                                  | -2.82 | 0.58 | 0.04 |
| A_52_P500856 | NM_146197 | Acsm2     | 233799 | acyl-CoA synthetase medium-chain family member 2                                    | -3.45 | 0.58 | 0.01 |
| A_52_P652968 | AY214462  | Steap3    | 68428  | STEAP family member 3                                                               | -2.89 | 0.58 | 0.03 |
| A_52_P780972 | AV079128  | Map3k4    | 26407  | mitogen-activated protein kinase kinase kinase 4                                    | -4.69 | 0.58 | 0.00 |
| A_51_P217415 | XM_126830 | 2410004P0 | 73667  | RIKEN cDNA 2410004P03 gene                                                          | -3.40 | 0.58 | 0.01 |
| A_51_P494622 | AK144842  | Ttc13     | 234875 | tetratricopeptide repeat domain 13                                                  | -3.57 | 0.58 | 0.01 |
| A_52_P174872 | AK028820  | C030015A1 | 177418 | RIKEN cDNA C030015A19 gene                                                          | -3.39 | 0.58 | 0.01 |
| A_52_P625808 | NM_031179 | Sf3b1     | 81898  | splicing factor 3b, subunit 1                                                       | -3.97 | 0.58 | 0.00 |
| A_51_P324871 | NM_201351 | Cybas3    | 225912 | cytochrome b, ascorbate dependent 3                                                 | -3.42 | 0.58 | 0.01 |
| A_52_P614336 | NM_011116 | Pld3      | 18807  | phospholipase D family, member 3                                                    | -2.65 | 0.58 | 0.06 |
| A_51_P123066 | AK016133  | 4930555K1 | 620121 | RIKEN cDNA 4930555K19 gene                                                          | -3.58 | 0.58 | 0.01 |
| A_52_P563450 | AK010171  | Brix1     | 67832  | BRX1, biogenesis of ribosomes, homolog ( <i>S. cerevisiae</i> )                     | -2.61 | 0.58 | 0.07 |
| A_52_P353198 | NM_144514 | Commd1    | 17846  | COMM domain containing 1                                                            | -3.31 | 0.58 | 0.01 |
| A_52_P26892  | AK008884  | C1galt1   | 94192  | core 1 synthase, glycoprotein-N-acetylgalactosamine 3-beta-galactosyltransferase, 1 | -3.36 | 0.58 | 0.01 |
| A_51_P517928 | NM_011020 | Hspa4l    | 18415  | heat shock protein 4 like                                                           | -4.86 | 0.58 | 0.00 |
| A_51_P147207 | NM_011563 | Prdx2     | 21672  | peroxiredoxin 2                                                                     | -4.02 | 0.58 | 0.00 |
| A_51_P460710 | NM_172605 | Tdrd3     | 219249 | tudor domain containing 3                                                           | -3.31 | 0.58 | 0.01 |
| A_52_P431872 | NM_027275 | Ptcd3     | 69956  | pentatricopeptide repeat domain 3                                                   | -2.79 | 0.58 | 0.04 |
| A_51_P511646 | NM_029561 | Ndfip2    | 76273  | Nedd4 family interacting protein 2                                                  | -2.94 | 0.58 | 0.02 |
| A_52_P175376 | AK086294  | Tcfcp2l1  | 81879  | transcription factor CP2-like 1                                                     | -3.02 | 0.58 | 0.02 |
| A_51_P120295 | NM_029562 | Cyp2d26   | 76279  | cytochrome P450, family 2, subfamily d, polypeptide 26                              | -3.60 | 0.58 | 0.01 |
| A_51_P500044 | AK036010  | Vldlr     | 22359  | very low density lipoprotein receptor                                               | -3.49 | 0.58 | 0.01 |

|              |           |           |        |                                                             |       |      |      |
|--------------|-----------|-----------|--------|-------------------------------------------------------------|-------|------|------|
| A_51_P106859 | NM_138721 | Lsm10     | 116748 | U7 snRNP-specific Sm-like protein LSM10                     | -3.16 | 0.58 | 0.01 |
| A_51_P360508 | NM_144801 | Tmem143   | 70209  | transmembrane protein 143                                   | -3.10 | 0.57 | 0.02 |
| A_51_P235440 | AK016197  | Pelp1     | 75273  | proline, glutamic acid and leucine rich protein 1           | -3.25 | 0.57 | 0.01 |
| A_52_P244723 | NM_173038 | Tbcel     | 272589 | tubulin folding cofactor E-like                             | -3.16 | 0.57 | 0.01 |
| A_51_P139165 | NM_025822 | Rsrc1     | 66880  | arginine/serine-rich coiled-coil 1                          | -3.09 | 0.57 | 0.02 |
| A_52_P452540 | NM_021896 | Gucy1a3   | 60596  | guanylate cyclase 1, soluble, alpha 3                       | -3.55 | 0.57 | 0.01 |
| A_51_P216219 | NM_007982 | Ptk2      | 14083  | PTK2 protein tyrosine kinase 2                              | -2.81 | 0.57 | 0.04 |
|              |           |           |        | NADH dehydrogenase (ubiquinone) 1, subcomplex               |       |      |      |
| A_52_P270888 | NM_025523 | Ndufc1    | 66377  | unknown, 1                                                  | -3.20 | 0.57 | 0.01 |
| A_51_P361563 | NM_145385 | Mlf2      | 30853  | myeloid leukemia factor 2                                   | -4.38 | 0.57 | 0.00 |
| A_51_P378858 | NM_025770 | Atg10     | 66795  | autophagy-related 10 (yeast)                                | -3.70 | 0.57 | 0.00 |
| A_51_P140374 | NM_139228 | Rhbdl3    | 246104 | rhomboid, veinlet-like 3 (Drosophila)                       | -4.08 | 0.57 | 0.00 |
| A_51_P310164 | AK013367  | 2810459M  | 72792  | RIKEN cDNA 2810459M11 gene                                  | -3.44 | 0.57 | 0.01 |
| A_51_P482508 | AK033099  | Sc4mol    | 66234  | sterol-C4-methyl oxidase-like                               | -2.98 | 0.57 | 0.02 |
| A_51_P421244 | NM_026662 | Prps2     | 110639 | phosphoribosyl pyrophosphate synthetase 2                   | -4.80 | 0.57 | 0.00 |
|              |           |           |        | ATPase, aminophospholipid transporter (APLT), class I,      |       |      |      |
| A_52_P385896 | NM_001038 | Atp8a1    | 11980  | type 8A, member 1                                           | -4.22 | 0.57 | 0.00 |
| A_51_P137375 | NM_026033 | Gatad1    | 67210  | GATA zinc finger domain containing 1                        | -3.60 | 0.57 | 0.01 |
| A_51_P483928 | NM_001038 | Glrx2     | 69367  | glutaredoxin 2 (thioltransferase)                           | -3.22 | 0.57 | 0.01 |
| A_51_P343717 | NA        | NA        | NA     | NA                                                          | -4.45 | 0.57 | 0.00 |
| A_52_P836389 | DV062564  | NA        | NA     | NA                                                          | -4.16 | 0.57 | 0.00 |
|              |           |           |        | ATP synthase, H <sup>+</sup> transporting, mitochondrial F1 |       |      |      |
| A_51_P378087 | NM_020615 | Atp5c1    | 11949  | complex, gamma polypeptide 1                                | -5.09 | 0.57 | 0.00 |
| A_51_P495485 | NM_028264 | Tmem55a   | 72519  | transmembrane protein 55A                                   | -4.00 | 0.57 | 0.00 |
|              |           |           |        |                                                             |       |      |      |
| A_52_P204689 | NM_009006 | Map4k2    | 26412  | mitogen-activated protein kinase kinase kinase kinase 2     | -4.11 | 0.57 | 0.00 |
| A_52_P238523 | NM_183147 | Sprn      | 212518 | shadow of prion protein                                     | -3.06 | 0.57 | 0.02 |
| A_52_P542794 | NM_001002 | 2610507B1 | 72503  | RIKEN cDNA 2610507B11 gene                                  | -4.27 | 0.57 | 0.00 |
| A_51_P243304 | NM_016905 | Galk1     | 14635  | galactokinase 1                                             | -3.31 | 0.57 | 0.01 |
|              |           |           |        | UDP-Gal:betaGlcNAc beta 1,4- galactosyltransferase,         |       |      |      |
| A_52_P122867 | NM_022305 | B4galt1   | 14595  | polypeptide 1                                               | -4.52 | 0.57 | 0.00 |
| A_51_P174314 | NM_019413 | Robo1     | 19876  | roundabout homolog 1 (Drosophila)                           | -3.90 | 0.57 | 0.00 |
| A_51_P386080 | NM_025297 | Mecr      | 26922  | mitochondrial trans-2-enoyl-CoA reductase                   | -2.82 | 0.57 | 0.04 |
| A_51_P284565 | NM_133706 | Tmem97    | 69071  | transmembrane protein 97                                    | -3.24 | 0.57 | 0.01 |

|              |           |           |         |                                                                                                                         |       |      |      |
|--------------|-----------|-----------|---------|-------------------------------------------------------------------------------------------------------------------------|-------|------|------|
| A_52_P465828 | NM_028833 | Iqce      | 74239   | IQ motif containing E<br>endoplasmic reticulum-golgi intermediate compartment                                           | -2.82 | 0.57 | 0.04 |
| A_52_P69707  | NM_026170 | Ergic1    | 67458   | (ERGIC) 1                                                                                                               | -2.87 | 0.57 | 0.03 |
| A_51_P269084 | NM_175329 | Chchd10   | 103172  | coiled-coil-helix-coiled-coil-helix domain containing 10                                                                | -3.46 | 0.57 | 0.01 |
| A_51_P491758 | NA        | NA        | NA      | NA                                                                                                                      | -3.22 | 0.57 | 0.01 |
| A_51_P303824 | NM_029588 | 1700012L0 | 76383   | RIKEN cDNA 1700012L04 gene                                                                                              | -6.01 | 0.57 | 0.00 |
| A_51_P267861 | NM_021542 | Kcnk5     | 16529   | potassium channel, subfamily K, member 5                                                                                | -3.21 | 0.57 | 0.01 |
| A_52_P480532 | AK020640  | Gpc4      | 14735   | glypican 4                                                                                                              | -3.73 | 0.57 | 0.00 |
| A_51_P465445 | NM_008633 | Mtap4     | 17758   | microtubule-associated protein 4                                                                                        | -3.57 | 0.57 | 0.01 |
| A_51_P226142 | AK131163  | Fam116a   | 211922  | family with sequence similarity 116, member A                                                                           | -2.61 | 0.57 | 0.07 |
| A_52_P652092 | AK013674  | 2900053A1 | 1554362 | RIKEN cDNA 2900053A13 gene                                                                                              | -3.71 | 0.57 | 0.00 |
| A_52_P461292 | NM_008753 | Oaz1      | 18245   | ornithine decarboxylase antizyme 1                                                                                      | -3.07 | 0.57 | 0.02 |
| A_51_P471386 | NM_011800 | Cdh20     | 23836   | cadherin 20                                                                                                             | -3.84 | 0.57 | 0.00 |
| A_51_P128973 | NM_013474 | Apoa2     | 11807   | apolipoprotein A-II                                                                                                     | -4.64 | 0.57 | 0.00 |
| A_52_P306396 | NM_008914 | Ppp3cb    | 19056   | protein phosphatase 3, catalytic subunit, beta isoform                                                                  | -4.30 | 0.57 | 0.00 |
| A_51_P281938 | NM_011489 | Stat5b    | 20851   | signal transducer and activator of transcription 5B                                                                     | -4.65 | 0.57 | 0.00 |
| A_52_P359591 | NM_013744 | Zfp354b   | 27274   | zinc finger protein 354B                                                                                                | -2.84 | 0.57 | 0.03 |
| A_51_P379597 | NM_145518 | Ndufs1    | 227197  | NADH dehydrogenase (ubiquinone) Fe-S protein 1                                                                          | -4.12 | 0.57 | 0.00 |
| A_52_P230904 | NM_175450 | Wdr18     | 216156  | WD repeat domain 18                                                                                                     | -3.86 | 0.57 | 0.00 |
| A_52_P538117 | XM_988017 | Chadl     | 214685  | chondroadherin-like                                                                                                     | -2.98 | 0.57 | 0.02 |
| A_52_P560620 | NM_145215 | Abhd11    | 68758   | abhydrolase domain containing 11                                                                                        | -3.16 | 0.57 | 0.01 |
| A_52_P106294 | NM_172587 | Cdc14b    | 218294  | CDC14 cell division cycle 14 homolog B ( <i>S. cerevisiae</i> )<br>solute carrier family 9 (sodium/hydrogen exchanger), | -3.21 | 0.57 | 0.01 |
| A_52_P375323 | NM_177909 | Slc9a9    | 331004  | member 9                                                                                                                | -6.09 | 0.57 | 0.00 |
| A_52_P40975  | AK046528  | Fam13a    | 58909   | family with sequence similarity 13, member A                                                                            | -3.04 | 0.57 | 0.02 |
| A_51_P268563 | NM_007932 | Eng       | 13805   | endoglin                                                                                                                | -3.12 | 0.57 | 0.01 |
| A_52_P305053 | NM_177163 | NA        | NA      | NA                                                                                                                      | -4.50 | 0.57 | 0.00 |
| A_52_P226127 | NM_011805 | Dido1     | 23856   | death inducer-obliterator 1                                                                                             | -2.61 | 0.57 | 0.07 |
| A_52_P341339 | NM_009231 | Sos1      | 20662   | son of sevenless homolog 1 ( <i>Drosophila</i> )                                                                        | -4.94 | 0.57 | 0.00 |

|              |                    |            |        |                                                                                             |       |      |      |
|--------------|--------------------|------------|--------|---------------------------------------------------------------------------------------------|-------|------|------|
|              |                    |            |        | vesicle-associated membrane protein, associated                                             |       |      |      |
| A_51_P323443 | NM_019806          | Vapb       | 56491  | protein B and C                                                                             | -2.87 | 0.57 | 0.03 |
| A_52_P34893  | NM_025822          | Rsrc1      | 66880  | arginine/serine-rich coiled-coil 1                                                          | -3.10 | 0.57 | 0.02 |
| A_52_P559557 | NM_001033:BC026585 |            | 226527 | cDNA sequence BC026585                                                                      | -3.72 | 0.57 | 0.00 |
| A_51_P489821 | BC058274           | Wdfy3      | 72145  | WD repeat and FYVE domain containing 3                                                      | -2.99 | 0.57 | 0.02 |
| A_52_P485000 | AK052489           | Palld      | 72333  | palladin, cytoskeletal associated protein                                                   | -3.72 | 0.57 | 0.00 |
| A_51_P354706 | NM_010094          | Lefty1     | 13590  | left right determination factor 1                                                           | -3.55 | 0.57 | 0.01 |
| A_52_P547447 | NM_022432          | Sirt2      | 64383  | sirtuin 2 (silent mating type information regulation 2, homolog) 2 ( <i>S. cerevisiae</i> ) | -2.92 | 0.57 | 0.03 |
| A_51_P454152 | AK048416           | Ercc6      | 319955 | excision repair cross-complementing rodent repair deficiency, complementation group 6       | -3.13 | 0.57 | 0.01 |
| A_52_P387724 | NM_001079:         | Tcf7l1     | 21415  | transcription factor 7-like 1 (T-cell specific, HMG box)                                    | -3.49 | 0.57 | 0.01 |
| A_51_P437240 | NM_007929          | Emp2       | 13731  | epithelial membrane protein 2                                                               | -2.79 | 0.57 | 0.04 |
| A_52_P795929 | AK081614           | NA         | NA     | NA                                                                                          | -3.99 | 0.57 | 0.00 |
| A_52_P557053 | NM_011235          | Rad51l3    | 19364  | RAD51-like 3 ( <i>S. cerevisiae</i> )                                                       | -2.74 | 0.57 | 0.05 |
| A_51_P273197 | NM_024227          | Mrpl28     | 68611  | mitochondrial ribosomal protein L28                                                         | -4.11 | 0.57 | 0.00 |
| A_52_P225207 | NM_007523          | Bak1       | 12018  | BCL2-antagonist/killer 1                                                                    | -2.65 | 0.57 | 0.06 |
| A_51_P223058 | BC064474           | Cgn        | 70737  | cingulin                                                                                    | -2.89 | 0.57 | 0.03 |
| A_52_P266459 | NM_023503          | Ing2       | 69260  | inhibitor of growth family, member 2                                                        | -3.57 | 0.57 | 0.01 |
| A_51_P108757 | NM_024243          | Fuca1      | 71665  | fucosidase, alpha-L- 1, tissue                                                              | -4.40 | 0.57 | 0.00 |
| A_52_P456750 | NM_177583          | Aph1b      | 208117 | anterior pharynx defective 1b homolog ( <i>C. elegans</i> )                                 | -4.14 | 0.57 | 0.00 |
| A_51_P458538 | NM_025551          | Ndufa12    | 66414  | NADH dehydrogenase (ubiquinone) 1 alpha subcomplex, 12                                      | -3.15 | 0.57 | 0.01 |
| A_52_P387882 | NM_001004:         | Fbll1      | 237730 | fibrillarlin-like 1                                                                         | -3.81 | 0.57 | 0.00 |
| A_51_P308469 | NM_011884          | Rngtt      | 24018  | RNA guanylyltransferase and 5'-phosphatase                                                  | -4.33 | 0.57 | 0.00 |
| A_52_P893095 | NA                 | NA         | NA     | NA                                                                                          | -3.54 | 0.57 | 0.01 |
| A_52_P671502 | AK047515           | 9930021J0: | 240613 | RIKEN cDNA 9930021J03 gene                                                                  | -2.79 | 0.57 | 0.04 |
| A_51_P505339 | NM_025596          | Preli1     | 66494  | PRELI domain containing 1                                                                   | -4.21 | 0.57 | 0.00 |
| A_52_P122673 | NM_031998          | Tsga14     | 83922  | testis specific gene A14                                                                    | -3.01 | 0.57 | 0.02 |
| A_51_P193794 | NM_008512          | Lrp1       | 16971  | low density lipoprotein receptor-related protein 1                                          | -2.92 | 0.57 | 0.03 |
| A_51_P163778 | NM_027274          | NA         | NA     | NA                                                                                          | -3.37 | 0.57 | 0.01 |

|              |            |          |        |                                                                                  |       |      |      |
|--------------|------------|----------|--------|----------------------------------------------------------------------------------|-------|------|------|
| A_52_P348922 | AK017896   | C2cd2    | 207781 | C2 calcium-dependent domain containing 2                                         | -3.81 | 0.57 | 0.00 |
| A_52_P453469 | NM_001045! | Proca1   | 216974 | protein interacting with cyclin A1                                               | -3.10 | 0.57 | 0.02 |
| A_51_P155501 | NM_145939  | Alg3     | 208624 | asparagine-linked glycosylation 3 homolog (yeast, alpha-1,3-mannosyltransferase) | -3.43 | 0.57 | 0.01 |
| A_51_P211315 | NM_153545  | Lrrc45   | 217366 | leucine rich repeat containing 45                                                | -2.89 | 0.57 | 0.03 |
| A_52_P622067 | NM_029600  | Abcc3    | 76408  | ATP-binding cassette, sub-family C (CFTR/MRP), member 3                          | -4.78 | 0.57 | 0.00 |
| A_51_P221072 | NM_175425  | C1qtnf7  | 109323 | C1q and tumor necrosis factor related protein 7                                  | -4.19 | 0.57 | 0.00 |
| A_52_P228171 | NM_027652  | D5Wsu178 | 28042  | DNA segment, Chr 5, Wayne State University 178, expressed                        | -4.48 | 0.56 | 0.00 |
| A_52_P243249 | NM_011952  | Mapk3    | 26417  | mitogen-activated protein kinase 3                                               | -3.58 | 0.56 | 0.01 |
| A_52_P622641 | NM_008905  | Ppfibp2  | 19024  | PTPRF interacting protein, binding protein 2 (liprin beta 2)                     | -3.23 | 0.56 | 0.01 |
| A_51_P151362 | NM_028316  | Zfp444   | 72667  | zinc finger protein 444                                                          | -2.64 | 0.56 | 0.07 |
| A_51_P132625 | NM_053262  | Hsd17b11 | 114664 | hydroxysteroid (17-beta) dehydrogenase 11                                        | -3.68 | 0.56 | 0.00 |
| A_51_P153973 | NM_198322  | Zfp273   | 212569 | zinc finger protein 273                                                          | -3.84 | 0.56 | 0.00 |
| A_52_P29392  | NM_013866  | Zfp385a  | 29813  | zinc finger protein 385A                                                         | -2.88 | 0.56 | 0.03 |
| A_52_P278248 | NM_177345  | Mapkap1  | 227743 | mitogen-activated protein kinase associated protein 1                            | -2.83 | 0.56 | 0.03 |
| A_51_P241667 | NM_011159  | Prkdc    | 19090  | protein kinase, DNA activated, catalytic polypeptide                             | -2.94 | 0.56 | 0.02 |
| A_52_P29030  | AY139115   | NA       | NA     | NA                                                                               | -3.24 | 0.56 | 0.01 |
| A_51_P282092 | NM_009478  | Urod     | 22275  | uroporphyrinogen decarboxylase                                                   | -4.62 | 0.56 | 0.00 |
| A_51_P327539 | NM_146950  | Olfr341  | 258952 | olfactory receptor 341                                                           | -3.20 | 0.56 | 0.01 |
| A_52_P295067 | NM_009223  | Snn      | 20621  | stannin                                                                          | -3.81 | 0.56 | 0.00 |
| A_51_P247184 | NM_008728  | Npr3     | 18162  | natriuretic peptide receptor 3                                                   | -4.21 | 0.56 | 0.00 |
| A_51_P223583 | NM_134257  | Rgs3     | 50780  | regulator of G-protein signaling 3                                               | -2.89 | 0.56 | 0.03 |
| A_51_P501656 | NM_212445  | Kdelc2   | 68304  | KDEL (Lys-Asp-Glu-Leu) containing 2                                              | -5.60 | 0.56 | 0.00 |
| A_51_P428410 | NA         | NA       | NA     | NA                                                                               | -3.23 | 0.56 | 0.01 |
| A_52_P574710 | BC064447   | Whsc1l1  | 234135 | Wolf-Hirschhorn syndrome candidate 1-like 1 (human)                              | -3.83 | 0.56 | 0.00 |
| A_51_P168789 | BC026406   | Xylb     | 102448 | xylulokinase homolog (H. influenzae)                                             | -2.89 | 0.56 | 0.03 |
| A_51_P372186 | NM_020589  | Zfp467   | 68910  | zinc finger protein 467                                                          | -3.83 | 0.56 | 0.00 |
| A_52_P68674  | BC100378   | Hjurp    | 381280 | Holliday junction recognition protein                                            | -3.55 | 0.56 | 0.01 |

|              |           |           |        |                                                                                     |       |      |      |
|--------------|-----------|-----------|--------|-------------------------------------------------------------------------------------|-------|------|------|
| A_52_P642109 | BC029621  | Prpsap1   | 67763  | phosphoribosyl pyrophosphate synthetase-associated protein 1                        | -3.17 | 0.56 | 0.01 |
| A_52_P644806 | NM_026908 | Cab39l    | 69008  | calcium binding protein 39-like                                                     | -2.80 | 0.56 | 0.04 |
| A_51_P261470 | NM_028388 | Ndufv2    | 72900  | NADH dehydrogenase (ubiquinone) flavoprotein 2                                      | -4.26 | 0.56 | 0.00 |
| A_51_P473154 | NM_011633 | Traf5     | 22033  | TNF receptor-associated factor 5                                                    | -4.08 | 0.56 | 0.00 |
| A_51_P297647 | NM_139302 | Sh3glb2   | 227700 | SH3-domain GRB2-like endophilin B2                                                  | -2.83 | 0.56 | 0.04 |
| A_52_P128951 | NM_025671 | Ogfod2    | 66627  | 2-oxoglutarate and iron-dependent oxygenase domain containing 2                     | -3.36 | 0.56 | 0.01 |
| A_51_P151756 | NM_144826 | Utp6      | 216987 | UTP6, small subunit (SSU) processome component, homolog (yeast)                     | -2.86 | 0.56 | 0.03 |
| A_51_P172475 | NM_011309 | S100a1    | 20193  | S100 calcium binding protein A1                                                     | -3.23 | 0.56 | 0.01 |
| A_52_P544885 | NM_011459 | Serpinb8  | 20725  | serine (or cysteine) peptidase inhibitor, clade B, member 8                         | -4.89 | 0.56 | 0.00 |
| A_51_P319392 | NM_145938 | Rpp40     | 208366 | ribonuclease P 40 subunit (human)                                                   | -7.14 | 0.56 | 0.00 |
| A_51_P463187 | NM_194334 | Tbc1d2b   | 67016  | TBC1 domain family, member 2B                                                       | -2.70 | 0.56 | 0.05 |
| A_52_P300331 | NM_177327 | Wwp1      | 107568 | WW domain containing E3 ubiquitin protein ligase 1                                  | -4.35 | 0.56 | 0.00 |
| A_51_P115715 | NM_023049 | Asb2      | 65256  | ankyrin repeat and SOCS box-containing 2                                            | -5.20 | 0.56 | 0.00 |
| A_51_P330717 | NM_025287 | Spop      | 20747  | speckle-type POZ protein                                                            | -2.92 | 0.56 | 0.03 |
| A_51_P218535 | XM_130232 | Neb       | 17996  | nebulin                                                                             | -2.95 | 0.56 | 0.02 |
| A_51_P122825 | NM_010956 | Ogdh      | 18293  | oxoglutarate dehydrogenase (lipoamide)                                              | -3.03 | 0.56 | 0.02 |
| A_52_P544017 | NM_013649 | Ryk       | 20187  | receptor-like tyrosine kinase                                                       | -3.05 | 0.56 | 0.02 |
| A_52_P540462 | NM_001076 | 1810012P1 | 66274  | RIKEN cDNA 1810012P15 gene                                                          | -3.19 | 0.56 | 0.01 |
| A_51_P282523 | NM_054044 | Gpr124    | 78560  | G protein-coupled receptor 124                                                      | -3.30 | 0.56 | 0.01 |
| A_52_P365615 | NM_172759 | Ces5      | 234673 | carboxylesterase 5                                                                  | -3.40 | 0.56 | 0.01 |
| A_51_P218205 | NM_144514 | Commd1    | 17846  | COMM domain containing 1                                                            | -2.62 | 0.56 | 0.07 |
| A_51_P209225 | NM_133932 | Tada3     | 101206 | transcriptional adaptor 3                                                           | -2.89 | 0.56 | 0.03 |
| A_52_P240706 | NM_001039 | Ceacam1   | 26365  | carcinoembryonic antigen-related cell adhesion molecule 1                           | -3.37 | 0.56 | 0.01 |
| A_51_P117739 | NM_010216 | Figf      | 14205  | c-fos induced growth factor                                                         | -3.66 | 0.56 | 0.00 |
| A_51_P377489 | AF169286  | Ptplb     | 70757  | protein tyrosine phosphatase-like (proline instead of catalytic arginine), member b | -5.53 | 0.56 | 0.00 |
| A_51_P265685 | NM_026673 | Apoo      | 68316  | apolipoprotein O                                                                    | -5.16 | 0.56 | 0.00 |

| Accession    | Gene      | Protein   | Description | Score                                                                                           | Value | P-value |      |
|--------------|-----------|-----------|-------------|-------------------------------------------------------------------------------------------------|-------|---------|------|
| A_52_P222135 | NM_001033 | Lrch1     | 380916      | leucine-rich repeats and calponin homology (CH) domain containing 1                             | -3.75 | 0.56    | 0.00 |
| A_51_P133582 | NM_007625 | Cbx4      | 12418       | chromobox homolog 4 (Drosophila Pc class)                                                       | -3.16 | 0.56    | 0.01 |
| A_51_P425010 | NM_146702 | Olfr1444  | 258697      | olfactory receptor 1444                                                                         | -3.40 | 0.56    | 0.01 |
| A_51_P312517 | NM_008058 | Fzd8      | 14370       | frizzled homolog 8 (Drosophila)                                                                 | -3.64 | 0.56    | 0.00 |
| A_52_P407697 | NM_176904 | D230002A  | 319388      | RIKEN cDNA D230002A01 gene                                                                      | -2.63 | 0.56    | 0.07 |
| A_51_P409173 | NM_008492 | Ldhb      | 16832       | lactate dehydrogenase B                                                                         | -2.71 | 0.56    | 0.05 |
| A_52_P423174 | NM_146230 | Acaa1b    | 235674      | acetyl-Coenzyme A acyltransferase 1B                                                            | -3.38 | 0.56    | 0.01 |
| A_51_P123017 | NM_011818 | Gmcl1     | 23885       | germ cell-less homolog 1 (Drosophila) ArfGAP with GTPase domain, ankyrin repeat and PH domain 3 | -3.18 | 0.56    | 0.01 |
| A_51_P410112 | NM_139153 | Agap3     | 213990      | domain 3                                                                                        | -3.53 | 0.56    | 0.01 |
| A_52_P674357 | NM_153083 | Thtpa     | 105663      | thiamine triphosphatase                                                                         | -2.80 | 0.56    | 0.04 |
| A_51_P234330 | NM_133641 | Rtkn      | 20166       | rhotekin                                                                                        | -3.00 | 0.56    | 0.02 |
| A_51_P200586 | NM_027920 | 8-Mar     | 71779       | membrane-associated ring finger (C3HC4) 8                                                       | -5.37 | 0.56    | 0.00 |
| A_51_P311905 | AK011270  | 2610002I1 | 72341       | RIKEN cDNA 2610002I17                                                                           | -3.80 | 0.56    | 0.00 |
| A_52_P207314 | XM_284398 | NA        | NA          | NA                                                                                              | -4.66 | 0.56    | 0.00 |
| A_51_P341255 | AK078885  | AI842136  | 102596      | expressed sequence AI842136                                                                     | -3.22 | 0.56    | 0.01 |
| A_51_P342271 | NM_001035 | Setd6     | 66083       | SET domain containing 6                                                                         | -4.30 | 0.56    | 0.00 |
| A_52_P528505 | NM_026353 | Slc48a1   | 67739       | solute carrier family 48 (heme transporter), member 1                                           | -3.10 | 0.56    | 0.02 |
| A_51_P465988 | AK076333  | Ganc      | 76051       | glucosidase, alpha; neutral C                                                                   | -3.61 | 0.56    | 0.01 |
| A_52_P124812 | AK122301  | Usp15     | 14479       | ubiquitin specific peptidase 15                                                                 | -2.98 | 0.56    | 0.02 |
| A_51_P417720 | NM_176922 | Itga11    | 319480      | integrin alpha 11                                                                               | -3.98 | 0.56    | 0.00 |
| A_51_P211671 | NM_008424 | Kcne1     | 16509       | potassium voltage-gated channel, Isk-related subfamily, member 1                                | -2.79 | 0.56    | 0.04 |
| A_51_P380801 | NM_026013 | Dram2     | 67171       | VDNA-damage regulated autophagy modulator 2                                                     | -4.57 | 0.56    | 0.00 |
| A_52_P323259 | NA        | NA        | NA          | NA                                                                                              | -3.51 | 0.56    | 0.01 |
| A_52_P198916 | NM_153091 | St7l      | 229681      | suppression of tumorigenicity 7-like                                                            | -2.91 | 0.56    | 0.03 |
| A_51_P329441 | NM_009768 | Bsg       | 12215       | basigin                                                                                         | -3.21 | 0.56    | 0.01 |
| A_51_P432504 | NM_024229 | Pcyt2     | 68671       | phosphate cytidylyltransferase 2, ethanolamine                                                  | -3.71 | 0.56    | 0.00 |
| A_52_P105801 | AK140163  | Arsb      | 11881       | arylsulfatase B                                                                                 | -4.20 | 0.56    | 0.00 |
| A_51_P498004 | NM_010301 | Gna11     | 14672       | guanine nucleotide binding protein, alpha 11                                                    | -3.69 | 0.56    | 0.00 |
| A_52_P463968 | NM_008738 | Nrtn      | 18188       | neurturin                                                                                       | -4.99 | 0.56    | 0.00 |
| A_51_P236042 | NM_008874 | Plcb3     | 18797       | phospholipase C, beta 3                                                                         | -2.72 | 0.56    | 0.05 |

|               |           |                 |        |                                                                                                         |       |      |      |
|---------------|-----------|-----------------|--------|---------------------------------------------------------------------------------------------------------|-------|------|------|
| A_52_P154880  | NM_023626 | Ing3            | 71777  | inhibitor of growth family, member 3                                                                    | -3.10 | 0.56 | 0.02 |
| A_52_P129388  | NM_025685 | Col27a1         | 373864 | collagen, type XXVII, alpha 1                                                                           | -3.34 | 0.56 | 0.01 |
| A_51_P196925  | NM_009142 | Cx3cl1          | 20312  | chemokine (C-X3-C motif) ligand 1                                                                       | -2.83 | 0.56 | 0.04 |
| A_52_P383378  | NM_001004 | Whamm           | 434204 | WAS protein homolog associated with actin, golgi membranes and microtubules                             | -4.10 | 0.56 | 0.00 |
| A_52_P664593  | NM_146137 | Amigo1          | 229715 | adhesion molecule with Ig like domain 1                                                                 | -5.63 | 0.56 | 0.00 |
| A_51_P452533  | BC035277  | Ildr2           | 1E+08  | immunoglobulin-like domain containing receptor 2 death effector domain-containing DNA binding protein 2 | -2.74 | 0.56 | 0.05 |
| A_52_P204393  | AK043908  | Dedd2           | 67379  | 2                                                                                                       | -4.64 | 0.56 | 0.00 |
| A_52_P300856  | AK034570  | D130020L0319760 |        | RIKEN cDNA D130020L05 gene                                                                              | -3.18 | 0.56 | 0.01 |
| A_51_P492228  | NM_030037 | Mospd3          | 68929  | motile sperm domain containing 3                                                                        | -4.92 | 0.56 | 0.00 |
| A_51_P295582  | NM_025530 | Cutc            | 66388  | cutC copper transporter homolog (E.coli)                                                                | -4.67 | 0.56 | 0.00 |
| A_52_P638895  | NM_001025 | Vegfa           | 22339  | vascular endothelial growth factor A                                                                    | -3.15 | 0.56 | 0.01 |
| A_52_P167382  | NM_021793 | Tmem8           | 60455  | transmembrane protein 8 (five membrane-spanning domains)                                                | -3.38 | 0.56 | 0.01 |
| A_52_P585699  | NM_025296 | Ciao1           | 26371  | cytosolic iron-sulfur protein assembly 1 homolog (S. cerevisiae)                                        | -3.65 | 0.56 | 0.00 |
| A_51_P158628  | NM_011952 | Mapk3           | 26417  | mitogen-activated protein kinase 3                                                                      | -3.90 | 0.56 | 0.00 |
| A_52_P523422  | NM_007886 | Dtnb            | 13528  | dystrobrevin, beta                                                                                      | -4.35 | 0.56 | 0.00 |
| A_51_P395546  | NM_153537 | Phldb1          | 102693 | pleckstrin homology-like domain, family B, member 1                                                     | -3.21 | 0.56 | 0.01 |
| A_52_P1179742 | AK040669  | NA              | NA     | NA                                                                                                      | -2.71 | 0.56 | 0.05 |
| A_51_P250123  | NM_028543 | Zfp763          | 73451  | zinc finger protein 763                                                                                 | -3.81 | 0.55 | 0.00 |
| A_51_P199217  | XM_895899 | NA              | NA     | NA                                                                                                      | -5.34 | 0.55 | 0.00 |
| A_52_P239735  | NM_011341 | Sdf4            | 20318  | stromal cell derived factor 4                                                                           | -3.22 | 0.55 | 0.01 |
| A_52_P621064  | NA        | NA              | NA     | NA                                                                                                      | -3.36 | 0.55 | 0.01 |
| A_52_P59612   | NM_028866 | Wdr33           | 74320  | WD repeat domain 33                                                                                     | -4.68 | 0.55 | 0.00 |
| A_52_P226664  | AK040520  | Thsd4           | 207596 | thrombospondin, type I, domain containing 4                                                             | -3.84 | 0.55 | 0.00 |
| A_51_P213205  | NM_133778 | Fam131a         | 78408  | family with sequence similarity 131, member A                                                           | -3.51 | 0.55 | 0.01 |
| A_52_P66580   | BC011139  | Gck             | 103988 | glucokinase                                                                                             | -3.60 | 0.55 | 0.01 |
| A_52_P613977  | NA        | NA              | NA     | NA                                                                                                      | -3.71 | 0.55 | 0.00 |
| A_52_P449871  | NM_031166 | Id4             | 15904  | inhibitor of DNA binding 4                                                                              | -3.29 | 0.55 | 0.01 |
| A_51_P285217  | BC031575  | 4921513D2223989 |        | RIKEN cDNA 4921513D23 gene                                                                              | -3.54 | 0.55 | 0.01 |



|              |           |            |        |                                                                          |       |      |      |
|--------------|-----------|------------|--------|--------------------------------------------------------------------------|-------|------|------|
| A_51_P464588 | NM_138664 | Dnajc28    | 246738 | Dnaj (Hsp40) homolog, subfamily C, member 28                             | -2.80 | 0.55 | 0.04 |
| A_51_P414160 | NM_027935 | Tmem50a    | 71817  | transmembrane protein 50A                                                | -4.90 | 0.55 | 0.00 |
| A_51_P335583 | NM_172561 | Spag7      | 216873 | sperm associated antigen 7                                               | -3.71 | 0.55 | 0.00 |
| A_51_P181751 | NM_207267 | Tmsb15b1-  | 399591 | Tmsb15b1-Tmsb15b2 readthrough transcript                                 | -2.84 | 0.55 | 0.03 |
| A_52_P577662 | NM_007904 | Ednrb      | 13618  | endothelin receptor type B                                               | -3.25 | 0.55 | 0.01 |
| A_51_P374337 | NM_013520 | Flt3l      | 14256  | FMS-like tyrosine kinase 3 ligand                                        | -2.90 | 0.55 | 0.03 |
| A_51_P118415 | NM_029023 | Scpep1     | 74617  | serine carboxypeptidase 1                                                | -2.88 | 0.55 | 0.03 |
| A_51_P462556 | AK143982  | Gm10658    | 1E+08  | predicted gene 10658                                                     | -3.15 | 0.55 | 0.01 |
| A_52_P27864  | NM_011360 | Sgce       | 20392  | sarcoglycan, epsilon                                                     | -2.94 | 0.55 | 0.02 |
| A_52_P675157 | NM_007388 | Acp5       | 11433  | acid phosphatase 5, tartrate resistant                                   | -3.90 | 0.55 | 0.00 |
| A_51_P114372 | NM_027877 | Mus81      | 71711  | MUS81 endonuclease homolog (yeast)                                       | -2.81 | 0.55 | 0.04 |
| A_51_P237599 | NM_009691 | Aplp2      | 11804  | amyloid beta (A4) precursor-like protein 2                               | -3.10 | 0.55 | 0.02 |
| A_52_P468537 | NM_018888 | Uqcc       | 56046  | ubiquinol-cytochrome c reductase complex chaperone, CBP3 homolog (yeast) | -5.46 | 0.55 | 0.00 |
| A_51_P440443 | NM_138586 | Exosc5     | 27998  | exosome component 5                                                      | -4.19 | 0.55 | 0.00 |
| A_51_P104722 | NM_001010 | Gpr12      | 14738  | G-protein coupled receptor 12                                            | -5.46 | 0.55 | 0.00 |
| A_51_P117752 | NM_009714 | Asgr1      | 11889  | asialoglycoprotein receptor 1                                            | -3.32 | 0.55 | 0.01 |
| A_51_P293077 | NM_008583 | Men1       | 17283  | multiple endocrine neoplasia 1                                           | -3.58 | 0.55 | 0.01 |
| A_52_P417489 | NM_009873 | Cdk6       | 12571  | cyclin-dependent kinase 6                                                | -4.41 | 0.55 | 0.00 |
| A_51_P219662 | NM_025831 | 1300014I06 | 66895  | RIKEN cDNA 1300014I06 gene                                               | -2.85 | 0.55 | 0.03 |
| A_51_P403636 | NM_001042 | Smad7      | 17131  | MAD homolog 7 (Drosophila)                                               | -2.87 | 0.55 | 0.03 |
| A_52_P371063 | NM_198026 | Iqcc       | 230767 | IQ motif containing C                                                    | -4.13 | 0.55 | 0.00 |
| A_52_P482724 | BC042707  | Prok1      | 246691 | prokineticin 1                                                           | -3.73 | 0.55 | 0.00 |
| A_51_P454691 | AK160693  | 4930430F08 | 68281  | RIKEN cDNA 4930430F08 gene                                               | -3.26 | 0.55 | 0.01 |
| A_51_P179531 | NM_008029 | Flt4       | 14257  | FMS-like tyrosine kinase 4                                               | -3.10 | 0.55 | 0.02 |
| A_52_P409578 | NM_178045 | Rassf4     | 213391 | Ras association (RalGDS/AF-6) domain family member 4                     | -5.59 | 0.55 | 0.00 |
| A_52_P128032 | NM_146051 | 3830406C13 | 218734 | RIKEN cDNA 3830406C13 gene                                               | -3.46 | 0.55 | 0.01 |
| A_51_P120717 | NM_010721 | Lmnb1      | 16906  | lamin B1                                                                 | -3.59 | 0.55 | 0.01 |
| A_51_P457528 | NM_007630 | Ccnb2      | 12442  | cyclin B2                                                                | -2.67 | 0.55 | 0.05 |
| A_52_P802967 | AK035497  | NA         | NA     | NA                                                                       | -4.69 | 0.55 | 0.00 |
| A_52_P550034 | NM_011563 | Prdx2      | 21672  | peroxiredoxin 2                                                          | -4.64 | 0.55 | 0.00 |
| A_51_P468558 | NM_172623 | Trem14     | 224840 | triggering receptor expressed on myeloid cells-like 4                    | -2.68 | 0.55 | 0.05 |

|               |           |           |        |                                                                        |       |      |      |
|---------------|-----------|-----------|--------|------------------------------------------------------------------------|-------|------|------|
| A_52_P232935  | NM_027251 | 2010107G2 | 69894  | RIKEN cDNA 2010107G23 gene                                             | -4.05 | 0.55 | 0.00 |
| A_52_P1149257 | AK039958  | Gm14207   | 1E+08  | predicted gene 14207                                                   | -4.53 | 0.55 | 0.00 |
| A_51_P503756  | AK008094  | Igl-V1    | 16142  | immunoglobulin lambda chain, variable 1                                | -2.81 | 0.55 | 0.04 |
| A_51_P112529  | NM_011256 | Pitpnm2   | 19679  | phosphatidylinositol transfer protein, membrane-associated 2           | -2.85 | 0.55 | 0.03 |
| A_52_P208213  | NA        | NA        | NA     | NA                                                                     | -2.67 | 0.55 | 0.05 |
| A_52_P436282  | AK041732  | 4933432B0 | 75729  | RIKEN cDNA 4933432B09 gene                                             | -2.98 | 0.55 | 0.02 |
| A_52_P522372  | NM_175503 | Aard      | 239435 | alanine and arginine rich domain containing protein                    | -5.79 | 0.55 | 0.00 |
| A_51_P135802  | NM_025282 | Mef2c     | 17260  | myocyte enhancer factor 2C                                             | -4.46 | 0.55 | 0.00 |
| A_51_P448664  | NM_011539 | Tbxas1    | 21391  | thromboxane A synthase 1, platelet                                     | -4.11 | 0.55 | 0.00 |
| A_52_P432787  | NM_026794 | Deb1      | 26901  | differentially expressed in B16F10 1                                   | -4.19 | 0.55 | 0.00 |
| A_52_P686136  | NM_172661 | Bat2l     | 227723 | HLA-B associated transcript 2-like                                     | -4.01 | 0.55 | 0.00 |
| A_52_P661     | AK081523  | Plxna4    | 243743 | plexin A4                                                              | -4.35 | 0.55 | 0.00 |
| A_51_P337020  | NM_025483 | Senp7     | 66315  | SUMO1/sentrin specific peptidase 7                                     | -3.02 | 0.55 | 0.02 |
| A_51_P222467  | NM_009593 | Abcg1     | 11307  | ATP-binding cassette, sub-family G (WHITE), member 1                   | -3.54 | 0.55 | 0.01 |
| A_52_P243542  | NM_183219 | NA        | NA     | NA                                                                     | -4.00 | 0.55 | 0.00 |
| A_52_P184525  | AK046516  | Gm10336   | 328186 | predicted gene 10336                                                   | -4.97 | 0.55 | 0.00 |
| A_51_P221428  | NM_028763 | Cbx6      | 494448 | chromobox homolog 6                                                    | -3.10 | 0.55 | 0.02 |
| A_51_P103406  | NM_011708 | Vwf       | 22371  | Von Willebrand factor homolog                                          | -4.19 | 0.55 | 0.00 |
| A_52_P1139509 | AK037434  | NA        | NA     | NA                                                                     | -3.20 | 0.55 | 0.01 |
| A_51_P193935  | NM_008650 | Mut       | 17850  | methylmalonyl-Coenzyme A mutase                                        | -4.03 | 0.55 | 0.00 |
| A_51_P426994  | NM_153591 | Nars2     | 244141 | asparaginyl-tRNA synthetase 2 (mitochondrial)(putative)                | -5.36 | 0.55 | 0.00 |
| A_51_P300143  | NM_025650 | Uqcr11    | 66594  | ubiquinol-cytochrome c reductase, complex III subunit XI               | -5.72 | 0.55 | 0.00 |
| A_51_P434041  | NM_021426 | Nkain4    | 58237  | Na <sup>+</sup> /K <sup>+</sup> transporting ATPase interacting 4      | -3.28 | 0.55 | 0.01 |
| A_51_P197043  | NM_028875 | Xrcc3     | 74335  | X-ray repair complementing defective repair in Chinese hamster cells 3 | -4.02 | 0.55 | 0.00 |
| A_51_P140321  | NM_026779 | Mocos     | 68591  | molybdenum cofactor sulfurase                                          | -4.01 | 0.55 | 0.00 |
| A_52_P382627  | NM_134111 | Eaf2      | 106389 | ELL associated factor 2                                                | -2.75 | 0.55 | 0.05 |
| A_52_P280344  | NM_028412 | Ciz1      | 68379  | CDKN1A interacting zinc finger protein 1                               | -2.95 | 0.55 | 0.02 |
| A_52_P99665   | AK129340  | Pdcd6ip   | 18571  | programmed cell death 6 interacting protein                            | -3.11 | 0.55 | 0.01 |

|               |           |                 |        |                                                                                                        |       |      |      |
|---------------|-----------|-----------------|--------|--------------------------------------------------------------------------------------------------------|-------|------|------|
| A_52_P601385  | NM_138309 | Cd99l2          | 171486 | CD99 antigen-like 2                                                                                    | -3.35 | 0.55 | 0.01 |
| A_51_P478544  | NA        | NA              | NA     | NA                                                                                                     | -2.82 | 0.55 | 0.04 |
| A_51_P295610  | NM_025567 | Cyc1            | 66445  | cytochrome c-1                                                                                         | -3.72 | 0.55 | 0.00 |
| A_52_P215387  | AK051059  | D030063E1328530 |        | hypothetical protein D030063E12                                                                        | -3.14 | 0.55 | 0.01 |
| A_52_P1140098 | AK038241  | Gm10914         | 1E+08  | predicted gene 10914                                                                                   | -3.55 | 0.55 | 0.01 |
| A_51_P109835  | NM_025407 | Uqcrc1          | 22273  | ubiquinol-cytochrome c reductase core protein 1                                                        | -5.04 | 0.55 | 0.00 |
| A_51_P379618  | NM_011834 | Aadat           | 23923  | aminoadipate aminotransferase                                                                          | -2.62 | 0.55 | 0.07 |
| A_51_P248786  | NM_026439 | Ccdc80          | 67896  | coiled-coil domain containing 80                                                                       | -3.20 | 0.55 | 0.01 |
| A_52_P261868  | NM_134257 | Rgs3            | 50780  | regulator of G-protein signaling 3                                                                     | -3.02 | 0.55 | 0.02 |
| A_51_P322000  | XM_130308 | NA              | NA     | NA                                                                                                     | -3.50 | 0.55 | 0.01 |
| A_52_P631613  | NA        | NA              | NA     | NA                                                                                                     | -3.42 | 0.55 | 0.01 |
| A_52_P147803  | NM_153577 | AI428936        | 233066 | expressed sequence AI428936                                                                            | -3.58 | 0.55 | 0.01 |
| A_51_P459873  | AK018157  | 6330411E070733  |        | RIKEN cDNA 6330411E07 gene                                                                             | -4.03 | 0.55 | 0.00 |
| A_52_P212214  | NM_153415 | Pomt2           | 217734 | protein-O-mannosyltransferase 2<br>mannoside acetylglucosaminyltransferase 4, isoenzyme                | -3.11 | 0.55 | 0.02 |
| A_52_P337220  | NM_145926 | Mgat4b          | 103534 | B                                                                                                      | -3.72 | 0.55 | 0.00 |
| A_51_P312275  | NM_026708 | Tlcd1           | 68385  | TLC domain containing 1                                                                                | -3.00 | 0.55 | 0.02 |
| A_51_P137236  | NM_019498 | Olfm1           | 56177  | olfactomedin 1                                                                                         | -3.44 | 0.55 | 0.01 |
| A_52_P19109   | NM_172538 | Vezt            | 215008 | vezatin, adherens junctions transmembrane protein                                                      | -2.64 | 0.55 | 0.07 |
| A_51_P178575  | AF269193  | Brd3            | 67382  | bromodomain containing 3                                                                               | -2.98 | 0.55 | 0.02 |
| A_52_P242724  | AK122311  | Opa1            | 74143  | optic atrophy 1 homolog (human)                                                                        | -4.64 | 0.55 | 0.00 |
| A_52_P592909  | NM_026384 | Dgat2           | 67800  | diacylglycerol O-acyltransferase 2                                                                     | -3.63 | 0.55 | 0.00 |
| A_51_P397934  | NM_130455 | Grin3b          | 170483 | glutamate receptor, ionotropic, NMDA3B                                                                 | -2.80 | 0.55 | 0.04 |
| A_51_P423666  | NM_015796 | Fbxo17          | 50760  | F-box protein 17                                                                                       | -4.55 | 0.55 | 0.00 |
| A_52_P336290  | NM_029519 | Rap2a           | 76108  | RAS related protein 2a                                                                                 | -3.40 | 0.55 | 0.01 |
| A_51_P114563  | NM_177370 | Rhbdd3          | 279766 | rhomboid domain containing 3                                                                           | -3.26 | 0.55 | 0.01 |
| A_51_P375987  | NM_021716 | Fign            | 60344  | fidgetin                                                                                               | -3.26 | 0.55 | 0.01 |
| A_51_P215559  | NM_144869 | BC021614        | 225884 | cDNA sequence BC021614                                                                                 | -3.26 | 0.54 | 0.01 |
| A_51_P167660  | NM_175157 | 2610204G270448  |        | RIKEN cDNA 2610204G22 gene<br>solute carrier family 37 (glycerol-3-phosphate<br>transporter), member 2 | -6.52 | 0.54 | 0.00 |
| A_51_P259774  | NM_020258 | Slc37a2         | 56857  |                                                                                                        | -4.32 | 0.54 | 0.00 |
| A_51_P483280  | NM_011170 | Prnp            | 19122  | prion protein                                                                                          | -3.83 | 0.54 | 0.00 |

|              |           |           |         |                                                                       |       |      |      |
|--------------|-----------|-----------|---------|-----------------------------------------------------------------------|-------|------|------|
|              |           |           |         | protein phosphatase 1B, magnesium dependent, beta isoform             | -4.80 | 0.54 | 0.00 |
| A_52_P402175 | NM_011151 | Ppm1b     | 19043   |                                                                       |       |      |      |
| A_51_P427151 | NM_138671 | Nadk      | 192185  | NAD kinase                                                            | -3.84 | 0.54 | 0.00 |
| A_52_P100625 | XM_146632 | 9030420J0 | 71544   | RIKEN cDNA 9030420J04 gene                                            | -3.42 | 0.54 | 0.01 |
| A_51_P493105 | NM_029790 | Mett5d1   | 76894   | methyltransferase 5 domain containing 1                               | -3.25 | 0.54 | 0.01 |
| A_52_P299358 | XM_128781 | NA        | NA      | NA                                                                    | -2.75 | 0.54 | 0.05 |
| A_51_P390164 | NM_172255 | Wdr11     | 207425  | WD repeat domain 11                                                   | -3.80 | 0.54 | 0.00 |
|              |           |           |         | vimentin-type intermediate filament associated coiled-coil protein    |       |      |      |
| A_51_P494863 | NM_178926 | Vmac      | 106639  |                                                                       | -2.71 | 0.54 | 0.05 |
| A_52_P105164 | NM_173748 | Nudcd3    | 209586  | NudC domain containing 3                                              | -4.48 | 0.54 | 0.00 |
|              |           |           |         | branched chain aminotransferase 2, mitochondrial                      |       |      |      |
| A_51_P181448 | NM_009737 | Bcat2     | 12036   |                                                                       | -2.77 | 0.54 | 0.04 |
| A_52_P723233 | BB450286  | NA        | NA      | NA                                                                    | -2.77 | 0.54 | 0.04 |
| A_52_P548470 | XM_001005 | NA        | NA      | NA                                                                    | -4.80 | 0.54 | 0.00 |
| A_51_P384436 | NM_001033 | Ctrc      | 76701   | chymotrypsin C (caldecrin)                                            | -3.30 | 0.54 | 0.01 |
| A_52_P432052 | XM_979393 | 4930515G  | 175098  | RIKEN cDNA 4930515G13 gene                                            | -2.78 | 0.54 | 0.04 |
|              |           |           |         | anterior pharynx defective 1b homolog (C. elegans)                    |       |      |      |
| A_51_P325124 | NM_177583 | Aph1b     | 208117  |                                                                       | -4.69 | 0.54 | 0.00 |
|              |           |           |         | acyl-CoA synthetase medium-chain family member 1                      |       |      |      |
| A_51_P376138 | NM_054094 | Acsm1     | 117147  |                                                                       | -3.80 | 0.54 | 0.00 |
| A_51_P416378 | NM_177644 | Rasal2    | 226525  | RAS protein activator like 2                                          | -3.30 | 0.54 | 0.01 |
| A_51_P114591 | NM_028865 | 1110005A  | 74319   | RIKEN cDNA 1110005A03 gene                                            | -2.65 | 0.54 | 0.06 |
| A_51_P292447 | NM_146219 | Klhl36    | 234796  | kelch-like 36 (Drosophila)                                            | -5.31 | 0.54 | 0.00 |
| A_52_P297457 | BC066053  | 0610030E  | 268364  | RIKEN cDNA 0610030E20 gene                                            | -3.83 | 0.54 | 0.00 |
| A_52_P370878 | NM_175489 | Osbpl8    | 237542  | oxysterol binding protein-like 8                                      | -5.01 | 0.54 | 0.00 |
| A_52_P387458 | AJ293625  | 1810035L  | 1380773 | RIKEN cDNA 1810035L17 gene                                            | -3.60 | 0.54 | 0.01 |
|              |           |           |         | solute carrier family 37 (glycerol-3-phosphate transporter), member 2 |       |      |      |
| A_51_P259773 | NM_020258 | Slc37a2   | 56857   |                                                                       | -3.42 | 0.54 | 0.01 |
|              |           |           |         | par-3 (partitioning defective 3) homolog (C. elegans)                 |       |      |      |
| A_51_P189198 | AK053576  | Pard3     | 93742   |                                                                       | -3.47 | 0.54 | 0.01 |
| A_51_P224771 | NM_172608 | Tmem184b  | 223693  | transmembrane protein 184b                                            | -2.79 | 0.54 | 0.04 |
| A_51_P372147 | NM_025292 | Synj2bp   | 24071   | synaptojanin 2 binding protein                                        | -3.81 | 0.54 | 0.00 |
| A_51_P293339 | NM_009427 | Tob1      | 22057   | transducer of ErbB-2.1                                                | -3.26 | 0.54 | 0.01 |
| A_52_P233664 | NM_007496 | Zfhx3     | 11906   | zinc finger homeobox 3                                                | -3.42 | 0.54 | 0.01 |

|              |            |           |        |                                                     |       |      |      |
|--------------|------------|-----------|--------|-----------------------------------------------------|-------|------|------|
| A_52_P94201  | NM_009306  | Syt1      | 20979  | synaptotagmin I                                     | -6.18 | 0.54 | 0.00 |
| A_52_P97489  | AK080954   | Eif2c1    | 236511 | eukaryotic translation initiation factor 2C, 1      | -3.28 | 0.54 | 0.01 |
| A_51_P121390 | NM_001038  | Anapc11   | 66156  | anaphase promoting complex subunit 11               | -3.68 | 0.54 | 0.00 |
| A_51_P510663 | NM_178652  | Supt3h    | 109115 | suppressor of Ty 3 homolog (S. cerevisiae)          | -2.95 | 0.54 | 0.02 |
| A_52_P136153 | NM_007749  | Cox7c     | 12867  | cytochrome c oxidase, subunit VIIc                  | -3.11 | 0.54 | 0.02 |
| A_51_P268964 | AK013928   | 3100003M  | 73082  | RIKEN cDNA 3100003M19 gene                          | -4.09 | 0.54 | 0.00 |
| A_52_P356313 | XM_0010051 | NA        | NA     | NA                                                  | -3.32 | 0.54 | 0.01 |
| A_52_P82532  | NM_009746  | Bcl7c     | 12055  | B-cell CLL/lymphoma 7C                              | -2.67 | 0.54 | 0.05 |
| A_51_P147684 | X76653     | Nr2f2     | 11819  | nuclear receptor subfamily 2, group F, member 2     | -2.63 | 0.54 | 0.07 |
| A_51_P444335 | NM_019800  | Acp6      | 66659  | acid phosphatase 6, lysophosphatidic                | -2.72 | 0.54 | 0.05 |
| A_51_P444052 | NM_011327  | Scp2      | 20280  | sterol carrier protein 2, liver                     | -2.69 | 0.54 | 0.05 |
| A_52_P965502 | XM_911969  | LOC636537 | 636537 | similar to signal sequence receptor, alpha          | -3.06 | 0.54 | 0.02 |
| A_51_P312748 | NM_027695  | Oxsm      | 71147  | 3-oxoacyl-ACP synthase, mitochondrial               | -3.50 | 0.54 | 0.01 |
|              |            |           |        | nudix (nucleoside diphosphate linked moiety X)-type |       |      |      |
| A_51_P490388 | NM_025529  | Nudt8     | 66387  | motif 8                                             | -3.22 | 0.54 | 0.01 |
| A_51_P467770 | NM_028874  | Snx19     | 102607 | sorting nexin 19                                    | -4.38 | 0.54 | 0.00 |
| A_52_P388898 | NM_028476  | 2610110G1 | 73242  | RIKEN cDNA 2610110G12 gene                          | -3.35 | 0.54 | 0.01 |
| A_52_P162486 | NM_007542  | Bgn       | 12111  | biglycan                                            | -3.48 | 0.54 | 0.01 |
| A_52_P294834 | NM_001079  | 2310038E1 | 71903  | RIKEN cDNA 2310038E17 gene                          | -2.88 | 0.54 | 0.03 |
| A_52_P388164 | NM_146756  | OlfR608   | 258751 | olfactory receptor 608                              | -2.87 | 0.54 | 0.03 |
| A_52_P119301 | XM_133692  | NA        | NA     | NA                                                  | -3.92 | 0.54 | 0.00 |
| A_52_P416913 | NM_009471  | Umps      | 22247  | uridine monophosphate synthetase                    | -3.74 | 0.54 | 0.00 |
| A_51_P139748 | NM_009338  | Acat2     | 110460 | acetyl-Coenzyme A acetyltransferase 2               | -3.78 | 0.54 | 0.00 |
| A_52_P637338 | NM_025538  | Alkbh7    | 66400  | alkB, alkylation repair homolog 7 (E. coli)         | -3.70 | 0.54 | 0.00 |
| A_51_P149699 | NM_013534  | Leprel2   | 14789  | leprecan-like 2                                     | -4.18 | 0.54 | 0.00 |
| A_51_P516870 | NM_008409  | Itn2a     | 16431  | integral membrane protein 2A                        | -3.29 | 0.54 | 0.01 |
| A_51_P313638 | NM_134420  | Slc26a6   | 171429 | solute carrier family 26, member 6                  | -3.24 | 0.54 | 0.01 |
| A_51_P304879 | NA         | NA        | NA     | NA                                                  | -3.38 | 0.54 | 0.01 |
| A_52_P263774 | NM_144811  | Cbx7      | 52609  | chromobox homolog 7                                 | -2.75 | 0.54 | 0.05 |
| A_52_P380460 | NM_030133  | Srbd1     | 78586  | S1 RNA binding domain 1                             | -3.06 | 0.54 | 0.02 |
| A_51_P130666 | NM_134079  | Adk       | 11534  | adenosine kinase                                    | -4.31 | 0.54 | 0.00 |
| A_52_P78730  | NM_023483  | 1110032AC | 68721  | RIKEN cDNA 1110032A03 gene                          | -4.24 | 0.54 | 0.00 |
| A_51_P303728 | NM_172575  | Zfp277    | 246196 | zinc finger protein 277                             | -3.73 | 0.54 | 0.00 |

|              |           |            |        |                                                          |       |      |      |
|--------------|-----------|------------|--------|----------------------------------------------------------|-------|------|------|
|              |           |            |        | latent transforming growth factor beta binding protein   |       |      |      |
| A_51_P233101 | NM_008520 | Ltbp3      | 16998  | 3                                                        | -4.17 | 0.54 | 0.00 |
| A_51_P494430 | NM_031166 | Id4        | 15904  | inhibitor of DNA binding 4                               | -6.05 | 0.54 | 0.00 |
| A_51_P375227 | NM_009954 | Bcar1      | 12927  | breast cancer anti-estrogen resistance 1                 | -5.02 | 0.54 | 0.00 |
| A_51_P394946 | NM_024438 | Dusp19     | 68082  | dual specificity phosphatase 19                          | -2.84 | 0.54 | 0.03 |
| A_51_P159552 | AK159076  | Sin3b      | 20467  | transcriptional regulator, SIN3B (yeast)                 | -3.11 | 0.54 | 0.02 |
| A_52_P320181 | AK083075  | Pygl       | 110095 | liver glycogen phosphorylase                             | -3.10 | 0.54 | 0.02 |
| A_51_P266211 | NM_133741 | Snrk       | 20623  | SNF related kinase                                       | -2.83 | 0.54 | 0.04 |
| A_51_P325501 | NM_053250 | Crip3      | 114570 | cysteine-rich protein 3                                  | -3.07 | 0.54 | 0.02 |
| A_51_P334504 | NM_212468 | Ssbp1      | 381760 | single-stranded DNA binding protein 1                    | -3.90 | 0.54 | 0.00 |
|              |           |            |        | asparagine-linked glycosylation 6 homolog (yeast, alpha- |       |      |      |
| A_52_P473209 | AK157903  | Alg6       | 320438 | 1,3,-glucosyltransferase)                                | -3.03 | 0.54 | 0.02 |
| A_52_P671700 | AK080793  | 9330129D05 | 338350 | RIKEN cDNA 9330129D05 gene                               | -3.41 | 0.54 | 0.01 |
| A_52_P425435 | NA        | NA         | NA     | NA                                                       | -5.09 | 0.54 | 0.00 |
| A_51_P136699 | XM_127105 | Ttc7b      | 104718 | tetratricopeptide repeat domain 7B                       | -3.45 | 0.54 | 0.01 |
|              |           |            |        | serine (or cysteine) peptidase inhibitor, clade A,       |       |      |      |
| A_52_P598495 | NM_009245 | Serpina1c  | 20702  | member 1C                                                | -4.52 | 0.54 | 0.00 |
|              |           |            |        |                                                          |       |      |      |
| A_51_P159565 | NM_001033 | Arhgef9    | 236915 | CDC42 guanine nucleotide exchange factor (GEF) 9         | -4.81 | 0.54 | 0.00 |
| A_51_P200960 | NM_025808 | Lztr1      | 66863  | leucine-zipper-like transcriptional regulator, 1         | -3.37 | 0.53 | 0.01 |
| A_52_P563655 | NM_175090 | Slc31a1    | 20529  | solute carrier family 31, member 1                       | -4.25 | 0.53 | 0.00 |
| A_52_P669451 | AK135586  | NA         | NA     | NA                                                       | -3.19 | 0.53 | 0.01 |
| A_51_P183107 | NM_175226 | Rnf139     | 75841  | ring finger protein 139                                  | -4.39 | 0.53 | 0.00 |
|              |           |            |        | serine (or cysteine) peptidase inhibitor, clade C        |       |      |      |
| A_52_P409746 | NM_080844 | Serpinc1   | 11905  | (antithrombin), member 1                                 | -5.61 | 0.53 | 0.00 |
|              |           |            |        | synapse defective 1, Rho GTPase, homolog 2 (C.           |       |      |      |
| A_51_P362538 | XM_001004 | Syde2      | 214804 | elegans)                                                 | -3.39 | 0.53 | 0.01 |
| A_51_P331900 | NM_016747 | Dlg3       | 53310  | discs, large homolog 3 (Drosophila)                      | -3.60 | 0.53 | 0.01 |
| A_51_P485683 | NM_025960 | Trappc6a   | 67091  | trafficking protein particle complex 6A                  | -4.28 | 0.53 | 0.00 |
| A_52_P667923 | NM_011020 | Hspa4l     | 18415  | heat shock protein 4 like                                | -4.13 | 0.53 | 0.00 |
| A_51_P281835 | NM_198411 | Inf2       | 70435  | inverted formin, FH2 and WH2 domain containing           | -4.57 | 0.53 | 0.00 |
| A_52_P384508 | NM_145124 | Mib2       | 76580  | mindbomb homolog 2 (Drosophila)                          | -3.82 | 0.53 | 0.00 |
| A_52_P185753 | NM_019965 | Dnajb12    | 56709  | Dnaj (Hsp40) homolog, subfamily B, member 12             | -3.33 | 0.53 | 0.01 |

|              |                      |          |        |                                                         |       |      |      |
|--------------|----------------------|----------|--------|---------------------------------------------------------|-------|------|------|
|              |                      |          |        | avian musculoaponeurotic fibrosarcoma (v-maf) AS42      |       |      |      |
| A_51_P405167 | NM_001025!           | Maf      | 17132  | oncogene homolog                                        | -2.91 | 0.53 | 0.03 |
| A_52_P21986  | NM_026062            | Fam69a   | 67266  | family with sequence similarity 69, member A            | -4.15 | 0.53 | 0.00 |
| A_51_P339305 | NM_016812            | Banp     | 53325  | BTG3 associated nuclear protein                         | -2.96 | 0.53 | 0.02 |
| A_52_P26826  | NM_025410            | Lage3    | 66192  | L antigen family, member 3                              | -2.90 | 0.53 | 0.03 |
| A_51_P462814 | NM_023637            | Sars2    | 71984  | seryl-aminoacyl-tRNA synthetase 2                       | -4.92 | 0.53 | 0.00 |
| A_51_P316951 | AK078889             | Wipf3    | 330319 | WAS/WASL interacting protein family, member 3           | -3.42 | 0.53 | 0.01 |
| A_51_P321921 | NM_024221            | Pdhb     | 68263  | pyruvate dehydrogenase (lipoamide) beta                 | -4.51 | 0.53 | 0.00 |
| A_51_P481832 | NM_019519            | Rabggta  | 56187  | Rab geranylgeranyl transferase, a subunit               | -3.19 | 0.53 | 0.01 |
| A_52_P684130 | NM_001033: 2510002D2 | 72307    |        | RIKEN cDNA 2510002D24 gene                              | -3.76 | 0.53 | 0.00 |
| A_52_P297290 | NM_011012            | Oprl1    | 18389  | opioid receptor-like 1                                  | -3.95 | 0.53 | 0.00 |
| A_52_P244908 | AK031010             | NA       | NA     | NA                                                      | -5.39 | 0.53 | 0.00 |
| A_52_P559770 | NM_009691            | Aplp2    | 11804  | amyloid beta (A4) precursor-like protein 2              | -3.64 | 0.53 | 0.00 |
| A_52_P58994  | NM_008831            | Phb      | 18673  | prohibitin                                              | -3.38 | 0.53 | 0.01 |
|              |                      |          |        | nuclear factor of kappa light polypeptide gene enhancer |       |      |      |
| A_51_P497402 | NM_183091            | Nfkbil2  | 72749  | in B-cells inhibitor-like 2                             | -4.20 | 0.53 | 0.00 |
|              |                      |          |        |                                                         |       |      |      |
| A_51_P464981 | NM_025735            | Map1lc3a | 66734  | microtubule-associated protein 1 light chain 3 alpha    | -3.76 | 0.53 | 0.00 |
| A_51_P237418 | AK014752             | 4833422M | 75768  | RIKEN cDNA 4833422M21 gene                              | -3.81 | 0.53 | 0.00 |
|              |                      |          |        |                                                         |       |      |      |
| A_52_P231292 | AV373767             | Cyp2j6   | 13110  | cytochrome P450, family 2, subfamily j, polypeptide 6   | -3.32 | 0.53 | 0.01 |
|              |                      |          |        | UDP-Gal:betaGlcNAc beta 1,4-galactosyltransferase,      |       |      |      |
|              |                      |          |        | polypeptide 4                                           |       |      |      |
| A_51_P238383 | NM_019804            | B4galt4  | 56375  | polypeptide 4                                           | -4.58 | 0.53 | 0.00 |
| A_51_P496001 | NM_030066            | Armcx1   | 78248  | armadillo repeat containing, X-linked 1                 | -3.59 | 0.53 | 0.01 |
| A_52_P180988 | XM_901530            | NA       | NA     | NA                                                      | -3.51 | 0.53 | 0.01 |
| A_52_P98558  | NM_173765            | Aasdh    | 231326 | aminoadipate-semialdehyde dehydrogenase                 | -2.78 | 0.53 | 0.04 |
| A_51_P117777 | NM_016658            | Galt     | 14430  | galactose-1-phosphate uridyl transferase                | -3.77 | 0.53 | 0.00 |
| A_52_P322181 | CK020710             | Adrb1    | 11554  | adrenergic receptor, beta 1                             | -5.93 | 0.53 | 0.00 |
| A_52_P564983 | XM_204104            | Fam131c  | 277743 | family with sequence similarity 131, member C           | -4.30 | 0.53 | 0.00 |
| A_51_P299309 | NM_024465            | Abhd12   | 76192  | abhydrolase domain containing 12                        | -4.44 | 0.53 | 0.00 |
| A_51_P461578 | NM_007997            | Fdxr     | 14149  | ferredoxin reductase                                    | -2.72 | 0.53 | 0.05 |
| A_51_P408329 | AK089570             | NA       | NA     | NA                                                      | -3.55 | 0.53 | 0.01 |
| A_52_P299832 | NM_018797            | Plxnc1   | 54712  | plexin C1                                               | -3.72 | 0.53 | 0.00 |
| A_51_P179919 | NM_172759            | Ces5     | 234673 | carboxylesterase 5                                      | -3.66 | 0.53 | 0.00 |

|              |           |            |        |                                                                 |       |      |      |
|--------------|-----------|------------|--------|-----------------------------------------------------------------|-------|------|------|
| A_51_P293688 | NM_026405 | Rab32      | 67844  | RAB32, member RAS oncogene family                               | -3.82 | 0.53 | 0.00 |
| A_52_P412506 | NM_008649 | Mup5       | 17844  | major urinary protein 5                                         | -3.47 | 0.53 | 0.01 |
| A_51_P419666 | BC054536  | Adam11     | 11488  | a disintegrin and metallopeptidase domain 11                    | -2.83 | 0.53 | 0.03 |
| A_51_P163958 | NM_011467 | Spr        | 20751  | sepiapterin reductase                                           | -4.12 | 0.53 | 0.00 |
| A_51_P193130 | NM_011288 | Mrpl23     | 19935  | mitochondrial ribosomal protein L23                             | -3.21 | 0.53 | 0.01 |
| A_52_P49096  | NM_001039 | Rbms2      | 56516  | RNA binding motif, single stranded interacting protein 2        | -3.58 | 0.53 | 0.01 |
| A_51_P246677 | NM_020002 | Rec8       | 56739  | REC8 homolog (yeast)                                            | -2.64 | 0.53 | 0.06 |
| A_52_P534250 | NM_178660 | Rbms3      | 207181 | RNA binding motif, single stranded interacting protein          | -3.29 | 0.53 | 0.01 |
| A_52_P499980 | NM_146135 | Pias3      | 229615 | protein inhibitor of activated STAT 3                           | -3.13 | 0.53 | 0.01 |
| A_52_P374274 | AK046666  | 1110020G09 | 68646  | RIKEN cDNA 1110020G09 gene                                      | -2.74 | 0.53 | 0.05 |
| A_51_P356335 | NA        | NA         | NA     | NA                                                              | -4.09 | 0.53 | 0.00 |
| A_52_P394561 | AK008004  | Txnrd2     | 26462  | thioredoxin reductase 2                                         | -2.65 | 0.53 | 0.06 |
| A_51_P513041 | AK014639  | Dnajc1     | 13418  | Dnaj (Hsp40) homolog, subfamily C, member 1                     | -4.08 | 0.53 | 0.00 |
| A_51_P279693 | NM_009992 | Cyp1a1     | 13076  | cytochrome P450, family 1, subfamily a, polypeptide 1           | -3.53 | 0.53 | 0.01 |
| A_51_P433584 | NM_138681 | Bcas3      | 192197 | breast carcinoma amplified sequence 3                           | -3.46 | 0.53 | 0.01 |
| A_51_P248580 | NM_007953 | Esrra      | 26379  | estrogen related receptor, alpha                                | -3.08 | 0.53 | 0.02 |
| A_51_P516297 | NM_019405 | Cetn2      | 26370  | centrin 2                                                       | -3.94 | 0.53 | 0.00 |
| A_51_P397426 | NM_013897 | Timm8b     | 30057  | translocase of inner mitochondrial membrane 8 homolog b (yeast) | -2.74 | 0.53 | 0.05 |
| A_51_P345867 | NM_011939 | Hsf4       | 26386  | heat shock transcription factor 4                               | -4.81 | 0.53 | 0.00 |
| A_51_P104718 | NM_001010 | Gpr12      | 14738  | G-protein coupled receptor 12                                   | -5.32 | 0.53 | 0.00 |
| A_52_P104562 | NM_001037 | Lipt1      | 623661 | lipoyltransferase 1                                             | -3.24 | 0.53 | 0.01 |
| A_51_P157895 | NM_007668 | Cdk5       | 12568  | cyclin-dependent kinase 5                                       | -4.72 | 0.53 | 0.00 |
| A_51_P384148 | NM_013649 | Ryk        | 20187  | receptor-like tyrosine kinase                                   | -5.17 | 0.53 | 0.00 |
| A_51_P182358 | NM_175665 | Hist1h2bk  | 319184 | histone cluster 1, H2bk                                         | -2.85 | 0.53 | 0.03 |
| A_52_P375970 | BC075677  | Fam38b     | 667742 | family with sequence similarity 38, member B                    | -4.80 | 0.53 | 0.00 |
| A_51_P136355 | NM_025331 | Gng11      | 66066  | guanine nucleotide binding protein (G protein), gamma 11        | -3.08 | 0.53 | 0.02 |
| A_52_P617080 | NM_025868 | Tmx2       | 66958  | thioredoxin-related transmembrane protein 2                     | -2.97 | 0.53 | 0.02 |
| A_52_P666779 | NM_013545 | Ptpn6      | 15170  | protein tyrosine phosphatase, non-receptor type 6               | -4.08 | 0.53 | 0.00 |



|              |           |            |        |                                                                                                      |       |      |      |
|--------------|-----------|------------|--------|------------------------------------------------------------------------------------------------------|-------|------|------|
| A_51_P143431 | NM_011055 | Pde3b      | 18576  | phosphodiesterase 3B, cGMP-inhibited                                                                 | -2.88 | 0.53 | 0.03 |
| A_52_P372046 | NM_025584 | Cd99       | 673094 | CD99 antigen                                                                                         | -4.20 | 0.53 | 0.00 |
| A_51_P140211 | NM_030087 | Ndufv3     | 78330  | NADH dehydrogenase (ubiquinone) flavoprotein 3                                                       | -3.39 | 0.53 | 0.01 |
| A_51_P174384 | NM_028662 | Slc35b2    | 73836  | solute carrier family 35, member B2                                                                  | -3.51 | 0.53 | 0.01 |
| A_51_P478303 | NM_010006 | Cyp2d9     | 13105  | cytochrome P450, family 2, subfamily d, polypeptide 9                                                | -2.70 | 0.53 | 0.05 |
| A_51_P113182 | NM_013584 | Lifr       | 16880  | leukemia inhibitory factor receptor                                                                  | -4.12 | 0.53 | 0.00 |
| A_52_P29765  | AK002667  | Cmc1       | 67899  | COX assembly mitochondrial protein homolog (S. cerevisiae)                                           | -4.20 | 0.53 | 0.00 |
| A_52_P636427 | NM_021319 | Pglyrp2    | 57757  | peptidoglycan recognition protein 2                                                                  | -2.91 | 0.53 | 0.03 |
| A_52_P267824 | NM_197999 | 2210023G05 | 72361  | RIKEN cDNA 2210023G05 gene                                                                           | -4.15 | 0.53 | 0.00 |
| A_51_P287756 | NM_009553 | Zscan2     | 22691  | zinc finger and SCAN domain containing 2                                                             | -4.23 | 0.53 | 0.00 |
| A_51_P266964 | NM_177732 | Slc35d1    | 242585 | solute carrier family 35 (UDP-glucuronic acid/UDP-N-acetylgalactosamine dual transporter), member D1 | -3.67 | 0.53 | 0.00 |
| A_51_P268953 | AK170682  | Tmem64     | 100201 | transmembrane protein 64                                                                             | -3.05 | 0.53 | 0.02 |
| A_52_P439975 | AK010524  | 2410017117 | 675325 | RIKEN cDNA 2410017117 gene                                                                           | -3.35 | 0.53 | 0.01 |
| A_51_P155073 | NM_025399 | Nudt14     | 66174  | nudix (nucleoside diphosphate linked moiety X)-type motif 14                                         | -5.88 | 0.52 | 0.00 |
| A_51_P109050 | NM_023824 | Paqr4      | 76498  | progesterin and adipoQ receptor family member IV                                                     | -4.89 | 0.52 | 0.00 |
| A_52_P277104 | NM_001033 | Bank1      | 242248 | B-cell scaffold protein with ankyrin repeats 1                                                       | -5.31 | 0.52 | 0.00 |
| A_51_P351697 | NM_025430 | Mrpl35     | 66223  | mitochondrial ribosomal protein L35                                                                  | -5.31 | 0.52 | 0.00 |
| A_51_P355243 | AK028520  | Pstk       | 214580 | phosphoserine-tRNA kinase                                                                            | -4.36 | 0.52 | 0.00 |
| A_51_P310949 | NM_008911 | Ppox       | 19044  | protoporphyrinogen oxidase                                                                           | -2.79 | 0.52 | 0.04 |
| A_51_P204898 | AK005748  | 1700008A04 | 69351  | RIKEN cDNA 1700008A04 gene                                                                           | -4.39 | 0.52 | 0.00 |
| A_52_P162775 | NM_153176 | Spg7       | 234847 | spastic paraplegia 7 homolog (human)                                                                 | -5.18 | 0.52 | 0.00 |
| A_51_P405659 | NM_175342 | Cphx       | 105594 | cytoplasmic polyadenylated homeobox                                                                  | -3.34 | 0.52 | 0.01 |
| A_52_P2224   | AF213385  | Abcd1      | 11666  | ATP-binding cassette, sub-family D (ALD), member 1                                                   | -3.20 | 0.52 | 0.01 |
| A_51_P300666 | NM_153288 | Npb        | 208990 | neuropeptide B                                                                                       | -5.39 | 0.52 | 0.00 |
| A_51_P407690 | NM_175195 | 3110056O03 | 73218  | RIKEN cDNA 3110056O03 gene                                                                           | -3.36 | 0.52 | 0.01 |
| A_51_P155755 | AK077214  | Plid6      | 194908 | phospholipase D family, member 6                                                                     | -3.68 | 0.52 | 0.00 |
| A_52_P677963 | NM_026951 | Pex11c     | 69129  | peroxisomal biogenesis factor 11 gamma                                                               | -3.45 | 0.52 | 0.01 |

|              |           |           |        |                                                                                                                    |       |      |      |
|--------------|-----------|-----------|--------|--------------------------------------------------------------------------------------------------------------------|-------|------|------|
| A_51_P381670 | NM_023066 | Asph      | 65973  | aspartate-beta-hydroxylase                                                                                         | -3.15 | 0.52 | 0.01 |
| A_52_P304105 | NA        | NA        | NA     | NA                                                                                                                 | -4.51 | 0.52 | 0.00 |
| A_51_P253697 | NM_027186 | Rpain     | 69723  | RPA interacting protein                                                                                            | -4.90 | 0.52 | 0.00 |
| A_51_P417725 | NM_008841 | Pik3r2    | 18709  | phosphatidylinositol 3-kinase, regulatory subunit, polypeptide 2 (p85 beta)                                        | -3.76 | 0.52 | 0.00 |
| A_51_P466148 | NM_007533 | Bckdha    | 12039  | branched chain ketoacid dehydrogenase E1, alpha polypeptide                                                        | -4.34 | 0.52 | 0.00 |
| A_52_P472465 | NM_175683 | Dclre1c   | 227525 | DNA cross-link repair 1C, PSO2 homolog (S. cerevisiae)                                                             | -4.24 | 0.52 | 0.00 |
| A_51_P236738 | NR_002839 | Dlx6as    | 13397  | distal-less homeobox 6, antisense                                                                                  | -3.28 | 0.52 | 0.01 |
| A_52_P358093 | BC094565  | Fbxo10    | 269529 | F-box protein 10                                                                                                   | -3.79 | 0.52 | 0.00 |
| A_52_P126162 | NM_019880 | Mtch1     | 56462  | mitochondrial carrier homolog 1 (C. elegans)                                                                       | -4.87 | 0.52 | 0.00 |
| A_52_P363352 | NM_172310 | Tarsl2    | 272396 | threonyl-tRNA synthetase-like 2                                                                                    | -3.67 | 0.52 | 0.00 |
| A_51_P479618 | NM_134006 | Rdh5      | 19682  | retinol dehydrogenase 5                                                                                            | -3.59 | 0.52 | 0.01 |
| A_51_P401828 | NM_008646 | Cpamd8    | 17837  | C3 and PZP-like, alpha-2-macroglobulin domain containing 8                                                         | -3.52 | 0.52 | 0.01 |
| A_52_P238230 | AF152371  | Igk       | 243469 | immunoglobulin kappa chain complex                                                                                 | -3.09 | 0.52 | 0.02 |
| A_52_P619738 | NM_026240 | Gramd3    | 107022 | GRAM domain containing 3                                                                                           | -2.70 | 0.52 | 0.05 |
| A_52_P124320 | AK122247  | Khynyn    | 219094 | KH and NYN domain containing                                                                                       | -2.96 | 0.52 | 0.02 |
| A_51_P364185 | XM_486062 | NA        | NA     | NA                                                                                                                 | -3.51 | 0.52 | 0.01 |
| A_51_P269549 | NM_031254 | Trem2     | 83433  | triggering receptor expressed on myeloid cells 2                                                                   | -3.71 | 0.52 | 0.00 |
| A_51_P109939 | NM_144897 | Apoa1bp   | 246703 | apolipoprotein A-I binding protein                                                                                 | -4.95 | 0.52 | 0.00 |
| A_51_P374707 | NM_173007 | Tspan12   | 269831 | tetraspanin 12                                                                                                     | -4.18 | 0.52 | 0.00 |
| A_51_P302588 | NM_025313 | Atp5d     | 66043  | ATP synthase, H <sup>+</sup> transporting, mitochondrial F1 complex, delta subunit                                 | -4.05 | 0.52 | 0.00 |
| A_52_P68735  | NM_001013 | Shf       | 435684 | Src homology 2 domain containing F sema domain, transmembrane domain (TM), and cytoplasmic domain, (semaphorin) 6A | -4.45 | 0.52 | 0.00 |
| A_51_P352245 | NM_018744 | Sema6a    | 20358  | cytoplasmic domain, (semaphorin) 6A                                                                                | -5.07 | 0.52 | 0.00 |
| A_51_P254864 | CB723139  | NA        | NA     | NA                                                                                                                 | -3.44 | 0.52 | 0.01 |
| A_51_P458242 | NM_019880 | Mtch1     | 56462  | mitochondrial carrier homolog 1 (C. elegans)                                                                       | -5.05 | 0.52 | 0.00 |
| A_52_P258537 | NM_144883 | 5430407P1 | 227545 | RIKEN cDNA 5430407P10 gene                                                                                         | -2.85 | 0.52 | 0.03 |
| A_51_P421804 | NM_013896 | Timm9     | 30056  | translocase of inner mitochondrial membrane 9 homolog (yeast)                                                      | -2.88 | 0.52 | 0.03 |

|              |           |            |        |                                                       |       |      |      |
|--------------|-----------|------------|--------|-------------------------------------------------------|-------|------|------|
| A_51_P298514 | NM_177345 | Mapkap1    | 227743 | mitogen-activated protein kinase associated protein 1 | -2.91 | 0.52 | 0.03 |
| A_51_P206037 | NM_008817 | Peg3       | 18616  | paternally expressed 3                                | -3.43 | 0.52 | 0.01 |
| A_52_P634447 | BC095977  | Hs1bp3     | 58240  | HCLS1 binding protein 3                               | -3.03 | 0.52 | 0.02 |
| A_51_P452323 | NM_016701 | Nes        | 18008  | nestin                                                | -6.49 | 0.52 | 0.00 |
| A_52_P137829 | AK129472  | 4930402E1  | 319518 | RIKEN cDNA 4930402E16 gene                            | -3.81 | 0.52 | 0.00 |
| A_51_P443857 | NM_145823 | Pitpnc1    | 71795  | phosphatidylinositol transfer protein, cytoplasmic 1  | -2.68 | 0.52 | 0.05 |
| A_51_P246653 | NM_020008 | Clec7a     | 56644  | C-type lectin domain family 7, member a               | -2.83 | 0.52 | 0.04 |
| A_51_P317941 | NM_022032 | Perp       | 64058  | PERP, TP53 apoptosis effector                         | -4.49 | 0.52 | 0.00 |
| A_51_P214985 | NM_145492 | Zfp521     | 225207 | zinc finger protein 521                               | -3.46 | 0.52 | 0.01 |
| A_51_P279323 | NM_013902 | Fkbp3      | 30795  | FK506 binding protein 3                               | -3.25 | 0.52 | 0.01 |
| A_52_P365660 | NM_178725 | Lrrc4c     | 241568 | leucine rich repeat containing 4C                     | -4.11 | 0.52 | 0.00 |
| A_51_P273679 | NM_028772 | Dmgdh      | 74129  | dimethylglycine dehydrogenase precursor               | -4.22 | 0.52 | 0.00 |
| A_51_P511707 | NM_025636 | 2310079N02 | 66566  | RIKEN cDNA 2310079N02 gene                            | -3.16 | 0.52 | 0.01 |
| A_51_P494481 | NM_172468 | Snx30      | 209131 | sorting nexin family member 30                        | -3.34 | 0.52 | 0.01 |
| A_51_P441837 | NM_026837 | Tmem53     | 68777  | transmembrane protein 53                              | -3.13 | 0.52 | 0.01 |
| A_51_P292276 | NM_021604 | Agrn       | 11603  | agrin                                                 | -3.85 | 0.52 | 0.00 |
|              |           |            |        | SWI/SNF related, matrix associated, actin dependent   |       |      |      |
| A_51_P423880 | NM_025891 | Smarcd3    | 66993  | regulator of chromatin, subfamily d, member 3         | -3.24 | 0.52 | 0.01 |
| A_51_P435198 | NM_009968 | Cryz       | 12972  | crystallin, zeta                                      | -4.54 | 0.52 | 0.00 |
| A_51_P179789 | NM_145437 | Cd300ld    | 217305 | CD300 molecule-like family member d                   | -3.39 | 0.52 | 0.01 |
| A_52_P231079 | NM_144521 | Snap47     | 67826  | synaptosomal-associated protein, 47                   | -2.74 | 0.52 | 0.05 |
| A_52_P390448 | NA        | NA         | NA     | NA                                                    | -3.37 | 0.52 | 0.01 |
| A_52_P289835 | NM_183186 | Foxn3      | 71375  | forkhead box N3                                       | -3.03 | 0.52 | 0.02 |
| A_52_P150236 | NM_018816 | Apom       | 55938  | apolipoprotein M                                      | -3.08 | 0.52 | 0.02 |
| A_52_P52703  | BC031117  | Sh3d19     | 27059  | SH3 domain protein D19                                | -2.81 | 0.52 | 0.04 |
| A_52_P436643 | NM_018830 | Asah2      | 54447  | N-acylsphingosine amidohydrolase 2                    | -3.59 | 0.52 | 0.01 |
| A_51_P439348 | NM_028262 | Setd3      | 52690  | SET domain containing 3                               | -4.07 | 0.52 | 0.00 |
|              |           |            |        | potassium voltage-gated channel, shaker-related       |       |      |      |
| A_51_P149872 | NM_010596 | Kcna7      | 16495  | subfamily, member 7                                   | -2.86 | 0.52 | 0.03 |
| A_52_P134023 | NM_153100 | Rtp3       | 235636 | receptor transporter protein 3                        | -2.68 | 0.52 | 0.05 |
| A_51_P410451 | NM_028006 | Tube1      | 71924  | epsilon-tubulin 1                                     | -6.51 | 0.52 | 0.00 |

|              |           |           |        |                                                                                                   |       |      |      |
|--------------|-----------|-----------|--------|---------------------------------------------------------------------------------------------------|-------|------|------|
| A_52_P507305 | NM_026347 | lah1      | 67732  | isoamyl acetate-hydrolyzing esterase 1 homolog ( <i>S. cerevisiae</i> )                           | -4.52 | 0.52 | 0.00 |
| A_51_P236464 | NM_025633 | Metapl1   | 66559  | methionine aminopeptidase-like 1                                                                  | -3.69 | 0.52 | 0.00 |
| A_52_P463143 | NM_016742 | Cdc37     | 12539  | cell division cycle 37 homolog ( <i>S. cerevisiae</i> )                                           | -3.05 | 0.52 | 0.02 |
| A_51_P331028 | NA        | NA        | NA     | NA                                                                                                | -3.37 | 0.52 | 0.01 |
| A_51_P109742 | NM_028347 | Neil1     | 72774  | nei endonuclease VIII-like 1 ( <i>E. coli</i> )                                                   | -4.47 | 0.52 | 0.00 |
| A_52_P190527 | BC019948  | Gpatch8   | 237943 | G patch domain containing 8                                                                       | -2.82 | 0.52 | 0.04 |
| A_52_P566681 | NM_153581 | Gpm6a     | 234267 | glycoprotein m6a                                                                                  | -3.47 | 0.52 | 0.01 |
| A_52_P342015 | NA        | NA        | NA     | NA                                                                                                | -4.44 | 0.52 | 0.00 |
| A_51_P280519 | NM_025402 | 111003110 | 66179  | RIKEN cDNA 1110031102 gene                                                                        | -3.41 | 0.52 | 0.01 |
| A_51_P397834 | NM_010072 | Dpm1      | 13480  | dolichol-phosphate (beta-D) mannosyltransferase 1                                                 | -3.69 | 0.52 | 0.00 |
| A_52_P608132 | NM_001024 | Snx32     | 225861 | sorting nexin 32                                                                                  | -3.85 | 0.52 | 0.00 |
| A_52_P547478 | NM_025300 | Mrpl15    | 27395  | mitochondrial ribosomal protein L15                                                               | -3.12 | 0.52 | 0.01 |
| A_52_P193060 | NM_013711 | Txnrd2    | 26462  | thioredoxin reductase 2                                                                           | -4.04 | 0.52 | 0.00 |
| A_51_P372456 | NM_026621 | NA        | NA     | NA                                                                                                | -4.50 | 0.52 | 0.00 |
| A_51_P314323 | NM_030083 | Lsmd1     | 78304  | LSM domain containing 1                                                                           | -4.00 | 0.52 | 0.00 |
| A_51_P511745 | NM_025757 | 4933439F1 | 66771  | RIKEN cDNA 4933439F18 gene                                                                        | -4.21 | 0.52 | 0.00 |
| A_51_P124568 | NM_008621 | Mpp1      | 17524  | membrane protein, palmitoylated latent transforming growth factor beta binding protein 2          | -2.99 | 0.52 | 0.02 |
| A_51_P257457 | NM_013589 | Ltbp2     | 16997  | 2                                                                                                 | -3.05 | 0.52 | 0.02 |
| A_51_P160787 | NM_007491 | Art5      | 11875  | ADP-ribosyltransferase 5                                                                          | -5.05 | 0.52 | 0.00 |
| A_51_P423143 | NM_176828 | C030006K1 | 223665 | RIKEN cDNA C030006K11 gene                                                                        | -2.92 | 0.52 | 0.03 |
| A_52_P575178 | NA        | NA        | NA     | NA                                                                                                | -3.65 | 0.52 | 0.00 |
| A_51_P472879 | NM_008555 | Masp1     | 17174  | mannan-binding lectin serine peptidase 1 succinate-Coenzyme A ligase, ADP-forming, beta subunit   | -3.86 | 0.52 | 0.00 |
| A_51_P111554 | NM_011506 | Sucla2    | 20916  | subunit                                                                                           | -3.71 | 0.52 | 0.00 |
| A_51_P262616 | BC072607  | Tbc1d30   | 74694  | TBC1 domain family, member 30                                                                     | -4.30 | 0.52 | 0.00 |
| A_52_P666930 | NM_178060 | Thra      | 21833  | thyroid hormone receptor alpha                                                                    | -5.63 | 0.52 | 0.00 |
| A_51_P393668 | NM_181540 | Tm6sf2    | 107770 | transmembrane 6 superfamily member 2 succinate dehydrogenase complex, subunit B, iron sulfur (lp) | -3.66 | 0.52 | 0.00 |
| A_51_P234853 | NM_023374 | Sdhb      | 67680  | (lp)                                                                                              | -4.36 | 0.52 | 0.00 |
| A_52_P615312 | NM_173757 | Mrps27    | 218506 | mitochondrial ribosomal protein S27                                                               | -4.01 | 0.52 | 0.00 |
| A_52_P525574 | NM_010642 | Klk1b21   | 16616  | kallikrein 1-related peptidase b21                                                                | -4.80 | 0.52 | 0.00 |

|              |           |         |        |                                                                                                      |       |      |      |
|--------------|-----------|---------|--------|------------------------------------------------------------------------------------------------------|-------|------|------|
| A_51_P344407 | NM_013543 | H2-Ke6  | 14979  | H2-K region expressed gene 6                                                                         | -4.92 | 0.52 | 0.00 |
| A_52_P225466 | BC046763  | Tmem219 | 68742  | transmembrane protein 219                                                                            | -4.83 | 0.51 | 0.00 |
| A_52_P635271 | NM_201646 | Btbd6   | 399566 | BTB (POZ) domain containing 6                                                                        | -4.30 | 0.51 | 0.00 |
| A_51_P254181 | NM_029629 | Fahd2a  | 68126  | fumarylacetoacetate hydrolase domain containing 2A                                                   | -4.94 | 0.51 | 0.00 |
| A_51_P263471 | NM_020001 | Clec4n  | 56620  | C-type lectin domain family 4, member n<br>solute carrier family 27 (fatty acid transporter), member | -3.97 | 0.51 | 0.00 |
| A_51_P289742 | NM_009512 | Slc27a5 | 26459  | 5                                                                                                    | -3.29 | 0.51 | 0.01 |
| A_51_P393634 | NM_013759 | Sepx1   | 27361  | selenoprotein X 1                                                                                    | -4.15 | 0.51 | 0.00 |
| A_51_P242345 | NM_146193 | Btbd1   | 83962  | BTB (POZ) domain containing 1                                                                        | -4.60 | 0.51 | 0.00 |
| A_52_P276748 | NM_026102 | Daam1   | 208846 | dishevelled associated activator of morphogenesis 1                                                  | -3.42 | 0.51 | 0.01 |
| A_52_P109941 | NM_007575 | Ciita   | 12265  | class II transactivator                                                                              | -3.89 | 0.51 | 0.00 |
| A_51_P103397 | NM_011708 | Vwf     | 22371  | Von Willebrand factor homolog                                                                        | -3.39 | 0.51 | 0.01 |
| A_52_P322301 | NM_176838 | Esrp2   | 77411  | epithelial splicing regulatory protein 2                                                             | -2.92 | 0.51 | 0.03 |
| A_52_P909310 | NM_011694 | Vdac1   | 22333  | voltage-dependent anion channel 1                                                                    | -4.96 | 0.51 | 0.00 |
| A_51_P425749 | NM_016742 | Cdc37   | 12539  | cell division cycle 37 homolog ( <i>S. cerevisiae</i> )                                              | -4.48 | 0.51 | 0.00 |
| A_51_P104727 | NM_153078 | Ehbp1   | 216565 | EH domain binding protein 1<br>NADH dehydrogenase (ubiquinone) 1, alpha/beta                         | -3.80 | 0.51 | 0.00 |
| A_51_P208801 | NM_028177 | Ndufab1 | 70316  | subcomplex, 1                                                                                        | -4.04 | 0.51 | 0.00 |
| A_51_P306109 | AK019683  | NA      | NA     | NA                                                                                                   | -4.59 | 0.51 | 0.00 |
| A_51_P298570 | NM_013506 | Eif4a2  | 13682  | eukaryotic translation initiation factor 4A2                                                         | -2.62 | 0.51 | 0.07 |
| A_52_P358097 | BC094565  | Fbxo10  | 269529 | F-box protein 10                                                                                     | -2.65 | 0.51 | 0.06 |
| A_52_P366116 | NM_028233 | Lrpprc  | 72416  | leucine-rich PPR-motif containing<br>suppressor of defective silencing 3 homolog ( <i>S.</i>         | -3.07 | 0.51 | 0.02 |
| A_52_P553171 | NM_178622 | Suds3   | 71954  | <i>cerevisiae</i> )                                                                                  | -5.85 | 0.51 | 0.00 |
| A_51_P359411 | NM_008141 | Gnat2   | 14686  | guanine nucleotide binding protein, alpha transducing 2                                              | -2.61 | 0.51 | 0.07 |
| A_52_P71135  | NM_001079 | Hnrnp3  | 432467 | heterogeneous nuclear ribonucleoprotein H3                                                           | -3.37 | 0.51 | 0.01 |
| A_51_P131084 | NM_145615 | Etfa    | 110842 | electron transferring flavoprotein, alpha polypeptide                                                | -5.00 | 0.51 | 0.00 |
| A_51_P272283 | NM_181588 | Cmb1    | 69574  | carboxymethylenebutenolidase-like ( <i>Pseudomonas</i> )                                             | -2.87 | 0.51 | 0.03 |
| A_52_P539540 | NM_028262 | Setd3   | 52690  | SET domain containing 3                                                                              | -3.67 | 0.51 | 0.00 |

|              |            |           |        |                                                      |       |      |      |
|--------------|------------|-----------|--------|------------------------------------------------------|-------|------|------|
|              |            |           |        | nudix (nucleoside diphosphate linked moiety X)-type  |       |      |      |
| A_51_P211325 | NM_025539  | Nudt2     | 66401  | motif 2                                              | -3.33 | 0.51 | 0.01 |
| A_52_P53698  | NM_011489  | Stat5b    | 20851  | signal transducer and activator of transcription 5B  | -3.83 | 0.51 | 0.00 |
| A_52_P208613 | NM_175027  | Fanclb    | 237211 | Fanconi anemia, complementation group B              | -4.97 | 0.51 | 0.00 |
| A_51_P398723 | NM_010228  | Flt1      | 14254  | FMS-like tyrosine kinase 1                           | -2.72 | 0.51 | 0.05 |
| A_52_P391623 | NM_028777  | Sec14l1   | 74136  | SEC14-like 1 ( <i>S. cerevisiae</i> )                | -4.00 | 0.51 | 0.00 |
| A_52_P193194 | NM_001001  | Slc35d2   | 70484  | solute carrier family 35, member D2                  | -4.28 | 0.51 | 0.00 |
| A_51_P290399 | NM_145489  | AI661453  | 224833 | expressed sequence AI661453                          | -3.62 | 0.51 | 0.00 |
| A_51_P471502 | NM_028049  | Fbxo22    | 71999  | F-box protein 22                                     | -4.46 | 0.51 | 0.00 |
| A_52_P244803 | XM_0010017 | D630033O  | 235302 | RIKEN cDNA D630033O11 gene                           | -4.46 | 0.51 | 0.00 |
| A_52_P357265 | NM_145823  | Pitpnc1   | 71795  | phosphatidylinositol transfer protein, cytoplasmic 1 | -2.74 | 0.51 | 0.05 |
| A_51_P416059 | NM_153550  | Dirc2     | 224132 | disrupted in renal carcinoma 2 (human)               | -2.90 | 0.51 | 0.03 |
| A_51_P393193 | NM_144511  | Gm4738    | 13909  | predicted gene 4738                                  | -6.30 | 0.51 | 0.00 |
| A_51_P450812 | NM_133973  | Cog4      | 102339 | component of oligomeric golgi complex 4              | -3.27 | 0.51 | 0.01 |
| A_51_P401717 | NM_145421  | Fam108a   | 216169 | family with sequence similarity 108, member A        | -5.53 | 0.51 | 0.00 |
| A_51_P163624 | AK044029   | Chadl     | 214685 | chondroadherin-like                                  | -3.88 | 0.51 | 0.00 |
| A_52_P188172 | NM_011523  | Synj2     | 20975  | synaptojanin 2                                       | -2.86 | 0.51 | 0.03 |
| A_51_P368210 | NM_145981  | Phyhip    | 105653 | phytanoyl-CoA hydroxylase interacting protein        | -3.89 | 0.51 | 0.00 |
| A_52_P36191  | NA         | NA        | NA     | NA                                                   | -3.22 | 0.51 | 0.01 |
| A_51_P251552 | NM_025864  | Tmem206   | 66950  | transmembrane protein 206                            | -4.09 | 0.51 | 0.00 |
| A_51_P187507 | NM_028037  | Acad10    | 71985  | acyl-Coenzyme A dehydrogenase family, member 10      | -3.04 | 0.51 | 0.02 |
| A_51_P486217 | NM_175638  | Wnk4      | 69847  | WNK lysine deficient protein kinase 4                | -4.04 | 0.51 | 0.00 |
| A_52_P42380  | NM_201359  | Tmem106c  | 380967 | transmembrane protein 106C                           | -3.29 | 0.51 | 0.01 |
| A_51_P411996 | NM_023483  | 1110032AC | 68721  | RIKEN cDNA 1110032A03 gene                           | -4.27 | 0.51 | 0.00 |
| A_51_P206251 | AK004088   | Ahcy1     | 229709 | S-adenosylhomocysteine hydrolase-like 1              | -3.13 | 0.51 | 0.01 |
| A_51_P469261 | NA         | NA        | NA     | NA                                                   | -6.22 | 0.51 | 0.00 |
| A_52_P427240 | XM_128374  | NA        | NA     | NA                                                   | -2.98 | 0.51 | 0.02 |
| A_51_P250459 | AK013063   | Mettl5    | 75422  | methyltransferase like 5                             | -4.46 | 0.51 | 0.00 |
| A_52_P250803 | AK164977   | Arl5b     | 75869  | ADP-ribosylation factor-like 5B                      | -3.89 | 0.51 | 0.00 |
| A_51_P495012 | NM_007622  | Cbx1      | 12412  | chromobox homolog 1 ( <i>Drosophila</i> HP1 beta)    | -3.05 | 0.51 | 0.02 |
| A_52_P316405 | NA         | NA        | NA     | NA                                                   | -4.99 | 0.51 | 0.00 |
| A_51_P505337 | AK002846   | Preli1    | 66494  | PRELI domain containing 1                            | -5.37 | 0.51 | 0.00 |

|              |           |            |        |                                                                       |       |      |      |
|--------------|-----------|------------|--------|-----------------------------------------------------------------------|-------|------|------|
| A_51_P314652 | NM_177130 | Glt28d2    | 320302 | glycosyltransferase 28 domain containing 2                            | -3.54 | 0.51 | 0.01 |
| A_52_P680735 | NM_012019 | Aifm1      | 26926  | apoptosis-inducing factor, mitochondrion-associated 1                 | -3.84 | 0.51 | 0.00 |
| A_51_P116137 | NM_008377 | Lrig1      | 16206  | leucine-rich repeats and immunoglobulin-like domains 1                | -5.05 | 0.51 | 0.00 |
| A_52_P422557 | XM_131700 | NA         | NA     | NA                                                                    | -3.38 | 0.51 | 0.01 |
| A_51_P476357 | AV024949  | 281048210  | 67243  | RIKEN cDNA 2810482107 gene                                            | -4.08 | 0.51 | 0.00 |
| A_51_P260169 | NM_010360 | Gstm5      | 14866  | glutathione S-transferase, mu 5                                       | -5.09 | 0.51 | 0.00 |
| A_51_P168792 | NM_001033 | Xylb       | 102448 | xylulokinase homolog (H. influenzae)                                  | -4.13 | 0.51 | 0.00 |
| A_52_P297113 | NM_013584 | Lifr       | 16880  | leukemia inhibitory factor receptor                                   | -4.42 | 0.51 | 0.00 |
| A_51_P250465 | BC027547  | Mettl5     | 75422  | methyltransferase like 5                                              | -4.46 | 0.51 | 0.00 |
| A_52_P796069 | NA        | NA         | NA     | NA                                                                    | -3.87 | 0.51 | 0.00 |
| A_52_P377941 | NM_153179 | Pkhd1      | 241035 | polycystic kidney and hepatic disease 1                               | -3.06 | 0.51 | 0.02 |
| A_52_P235278 | NM_153556 | Pms1       | 227099 | postmeiotic segregation increased 1 (S. cerevisiae)                   | -4.23 | 0.51 | 0.00 |
| A_51_P474151 | NM_177746 | Awat2      | 245532 | acyl-CoA wax alcohol acyltransferase 2                                | -6.04 | 0.51 | 0.00 |
| A_51_P484027 | NM_134158 | AF251705   | 140497 | cDNA sequence AF251705                                                | -3.84 | 0.51 | 0.00 |
| A_52_P150525 | NA        | NA         | NA     | NA                                                                    | -3.24 | 0.51 | 0.01 |
| A_51_P227785 | AK033046  | Klhl3      | 627648 | kelch-like 3 (Drosophila)                                             | -5.36 | 0.51 | 0.00 |
| A_51_P318804 | NM_029031 | Shpk       | 74637  | sedoheptulokinase                                                     | -3.06 | 0.51 | 0.02 |
| A_51_P237915 | NM_146258 | Stard13    | 243362 | StAR-related lipid transfer (START) domain containing 13              | -4.70 | 0.51 | 0.00 |
| A_51_P243194 | NM_178612 | Cnpy4      | 66455  | canopy 4 homolog (zebrafish)                                          | -3.31 | 0.51 | 0.01 |
| A_51_P106373 | NM_025321 | Sdhc       | 66052  | succinate dehydrogenase complex, subunit C, integral membrane protein | -4.40 | 0.51 | 0.00 |
| A_51_P375207 | AK083150  | NA         | NA     | NA                                                                    | -4.81 | 0.51 | 0.00 |
| A_52_P465386 | NA        | NA         | NA     | NA                                                                    | -4.41 | 0.51 | 0.00 |
| A_52_P480064 | NM_001078 | Tmem134    | 66990  | transmembrane protein 134                                             | -4.70 | 0.51 | 0.00 |
| A_51_P246339 | NM_028128 | Rfc5       | 72151  | replication factor C (activator 1) 5                                  | -4.14 | 0.51 | 0.00 |
| A_51_P493270 | NM_029963 | Mrps5      | 77721  | mitochondrial ribosomal protein S5                                    | -4.17 | 0.51 | 0.00 |
| A_52_P311566 | NM_016961 | Mapk9      | 26420  | mitogen-activated protein kinase 9                                    | -5.04 | 0.51 | 0.00 |
| A_52_P191210 | AK028720  | 9530091C03 | 320440 | RIKEN cDNA 9530091C08 gene                                            | -5.01 | 0.51 | 0.00 |
| A_51_P155152 | NM_020332 | Ank        | 11732  | progressive ankylosis                                                 | -3.39 | 0.51 | 0.01 |
| A_51_P381321 | NM_199080 | Ddx17      | 67040  | DEAD (Asp-Glu-Ala-Asp) box polypeptide 17                             | -3.14 | 0.51 | 0.01 |

|              |           |           |        |                                                            |       |      |      |
|--------------|-----------|-----------|--------|------------------------------------------------------------|-------|------|------|
| A_52_P523330 | NM_027215 | Tmem147   | 69804  | transmembrane protein 147                                  | -3.03 | 0.51 | 0.02 |
| A_52_P522990 | BC039287  | Trub1     | 72133  | TruB pseudouridine (psi) synthase homolog 1 (E. coli)      | -3.64 | 0.51 | 0.00 |
| A_51_P274163 | NM_029556 | Clybl     | 69634  | citrate lyase beta like                                    | -4.17 | 0.51 | 0.00 |
| A_52_P106081 | NM_031843 | Dpp7      | 83768  | dipeptidylpeptidase 7                                      | -5.80 | 0.51 | 0.00 |
| A_52_P594355 | NM_028162 | Tbc1d5    | 72238  | TBC1 domain family, member 5                               | -2.70 | 0.51 | 0.05 |
| A_51_P155085 | NM_172477 | Dennd2a   | 209773 | DENN/MADD domain containing 2A                             | -3.61 | 0.51 | 0.01 |
| A_51_P505156 | NM_138306 | Dgkz      | 104418 | diacylglycerol kinase zeta                                 | -5.08 | 0.51 | 0.00 |
| A_51_P371876 | NM_027230 | Zmynd8    | 228880 | zinc finger, MYND-type containing 8                        | -2.78 | 0.51 | 0.04 |
| A_51_P340947 | NM_027905 | 1300018J1 | 223776 | RIKEN cDNA 1300018J18 gene                                 | -4.51 | 0.51 | 0.00 |
| A_51_P307325 | NM_009030 | Rbbp4     | 19646  | retinoblastoma binding protein 4                           | -5.14 | 0.51 | 0.00 |
| A_51_P158061 | NM_026378 | Dalrd3    | 67789  | DALR anticodon binding domain containing 3                 | -6.11 | 0.51 | 0.00 |
| A_52_P652513 | NM_027400 | Lman1     | 70361  | lectin, mannose-binding, 1                                 | -3.60 | 0.51 | 0.01 |
| A_52_P24631  | NM_018745 | Azin1     | 54375  | antizyme inhibitor 1                                       | -3.39 | 0.51 | 0.01 |
| A_51_P311137 | NM_011360 | Sgce      | 20392  | sarcoglycan, epsilon                                       | -3.78 | 0.50 | 0.00 |
| A_52_P130952 | NM_145434 | Nr1d1     | 217166 | nuclear receptor subfamily 1, group D, member 1            | -3.06 | 0.50 | 0.02 |
| A_51_P260098 | U18992    | Gcdh      | 270076 | glutaryl-Coenzyme A dehydrogenase                          | -5.31 | 0.50 | 0.00 |
| A_52_P356841 | NM_001004 | 5730494M  | 66648  | RIKEN cDNA 5730494M16 gene                                 | -5.19 | 0.50 | 0.00 |
| A_51_P114826 | NM_019707 | Cdh13     | 12554  | cadherin 13                                                | -4.92 | 0.50 | 0.00 |
| A_51_P104128 | AK003452  | Oaz1      | 18245  | ornithine decarboxylase antizyme 1                         | -4.20 | 0.50 | 0.00 |
| A_51_P127456 | BC070402  | Lrrc68    | 232947 | leucine rich repeat containing 68                          | -5.15 | 0.50 | 0.00 |
| A_51_P116395 | NM_145428 | Dhrs7b    | 216820 | dehydrogenase/reductase (SDR family) member 7B             | -2.87 | 0.50 | 0.03 |
| A_51_P450764 | AK037367  | AU042671  | 269700 | expressed sequence AU042671                                | -3.80 | 0.50 | 0.00 |
| A_51_P359919 | NM_177445 | Dars      | 226414 | aspartyl-tRNA synthetase                                   | -2.69 | 0.50 | 0.05 |
| A_51_P225853 | NM_008786 | Pcmt1     | 18537  | protein-L-isoaspartate (D-aspartate) O-methyltransferase 1 | -4.05 | 0.50 | 0.00 |
| A_52_P471143 | AK151452  | Pusl1     | 433813 | pseudouridylate synthase-like 1                            | -3.84 | 0.50 | 0.00 |
| A_52_P435670 | NM_213733 | Npepl1    | 228961 | aminopeptidase-like 1                                      | -3.60 | 0.50 | 0.01 |
| A_51_P116940 | NM_007940 | Ephx2     | 13850  | epoxide hydrolase 2, cytoplasmic                           | -4.36 | 0.50 | 0.00 |
| A_52_P68755  | DV040849  | NA        | NA     | NA                                                         | -4.93 | 0.50 | 0.00 |
| A_52_P385536 | AK049305  | Ddx58     | 230073 | DEAD (Asp-Glu-Ala-Asp) box polypeptide 58                  | -4.27 | 0.50 | 0.00 |
| A_51_P308362 | NM_201410 | Ugt1a6b   | 394435 | UDP glucuronosyltransferase 1 family, polypeptide A6B      | -4.85 | 0.50 | 0.00 |



|              |           |                 |        |                                                                              |       |      |      |
|--------------|-----------|-----------------|--------|------------------------------------------------------------------------------|-------|------|------|
| A_52_P318447 | NM_153193 | Hsd3b2          | 15493  | hydroxy-delta-5-steroid dehydrogenase, 3 beta- and steroid delta-isomerase 2 | -3.48 | 0.50 | 0.01 |
| A_51_P185141 | NM_181072 | Myo1e           | 71602  | myosin IE                                                                    | -3.39 | 0.50 | 0.01 |
| A_51_P330090 | NM_180662 | Trappc9         | 76510  | trafficking protein particle complex 9                                       | -3.47 | 0.50 | 0.01 |
| A_51_P364671 | NM_029272 | Ndufs7          | 75406  | NADH dehydrogenase (ubiquinone) Fe-S protein 7                               | -3.62 | 0.50 | 0.00 |
| A_51_P189870 | AK129469  | Ears2           | 67417  | glutamyl-tRNA synthetase 2 (mitochondrial)(putative)                         | -3.72 | 0.50 | 0.00 |
| A_51_P321405 | NM_026714 | Ccdc163         | 68394  | coiled-coil domain containing 163                                            | -5.54 | 0.50 | 0.00 |
| A_51_P296796 | NM_027289 | Nt5dc2          | 70021  | 5'-nucleotidase domain containing 2                                          | -4.49 | 0.50 | 0.00 |
| A_51_P101573 | NM_029091 | Klc4            | 74764  | kinesin light chain 4                                                        | -5.72 | 0.50 | 0.00 |
| A_52_P437662 | NM_013884 | Cspg5           | 29873  | chondroitin sulfate proteoglycan 5                                           | -2.69 | 0.50 | 0.05 |
| A_52_P37890  | AK088541  | Ankrd28         | 105522 | ankyrin repeat domain 28                                                     | -3.15 | 0.50 | 0.01 |
| A_52_P215418 | NM_027456 | Armc9           | 78795  | armadillo repeat containing 9                                                | -4.81 | 0.50 | 0.00 |
| A_52_P559467 | NA        | NA              | NA     | NA                                                                           | -3.20 | 0.50 | 0.01 |
| A_52_P73475  | NM_175511 | Fam78a          | 241303 | family with sequence similarity 78, member A                                 | -4.40 | 0.50 | 0.00 |
| A_52_P274555 | NM_172926 | Snx14           | 244962 | sorting nexin 14                                                             | -2.73 | 0.50 | 0.05 |
| A_51_P516637 | NM_007555 | Bmp5            | 12160  | bone morphogenetic protein 5                                                 | -3.85 | 0.50 | 0.00 |
| A_51_P289407 | BC019404  | Spg11           | 214585 | spastic paraplegia 11                                                        | -3.45 | 0.50 | 0.01 |
| A_51_P376258 | NM_008133 | Glud1           | 14661  | glutamate dehydrogenase 1                                                    | -3.14 | 0.50 | 0.01 |
| A_51_P199367 | NM_016903 | Esd             | 13885  | esterase D/formylglutathione hydrolase                                       | -6.12 | 0.50 | 0.00 |
| A_51_P396003 | NM_026384 | Dgat2           | 67800  | diacylglycerol O-acyltransferase 2                                           | -4.30 | 0.50 | 0.00 |
| A_52_P311129 | NM_025911 | Ccdc91          | 67015  | coiled-coil domain containing 91                                             | -2.88 | 0.50 | 0.03 |
| A_51_P511680 | NM_001033 | Ttc38           | 239570 | tetratricopeptide repeat domain 38                                           | -2.78 | 0.50 | 0.04 |
| A_51_P103222 | NM_028064 | Slc39a4         | 72027  | solute carrier family 39 (zinc transporter), member 4                        | -4.45 | 0.50 | 0.00 |
| A_52_P213909 | NM_008220 | Hbb-b1          | 15129  | hemoglobin, beta adult major chain                                           | -2.66 | 0.50 | 0.06 |
| A_52_P479249 | NM_009382 | Thy1            | 21838  | thymus cell antigen 1, theta                                                 | -2.89 | 0.50 | 0.03 |
| A_51_P139745 | NM_153151 | Acat3           | 224530 | acetyl-Coenzyme A acetyltransferase 3                                        | -3.88 | 0.50 | 0.00 |
| A_52_P199614 | AK155186  | Wdfy4           | 545030 | WD repeat and FYVE domain containing 4                                       | -4.44 | 0.50 | 0.00 |
| A_52_P553443 | AK083983  | D730040F1242474 |        | RIKEN cDNA D730040F13 gene                                                   | -4.13 | 0.50 | 0.00 |
| A_52_P101238 | AK083460  | B230354K1320063 |        | RIKEN cDNA B230354K17 gene                                                   | -2.92 | 0.50 | 0.03 |
| A_52_P124083 | AK087552  | A530082C1320541 |        | RIKEN cDNA A530082C11 gene                                                   | -4.59 | 0.50 | 0.00 |

|              |           |          |        |                                                                               |       |      |      |
|--------------|-----------|----------|--------|-------------------------------------------------------------------------------|-------|------|------|
| A_51_P305843 | NM_025844 | Chordc1  | 66917  | cysteine and histidine-rich domain (CHORD)-containing, zinc-binding protein 1 | -3.36 | 0.50 | 0.01 |
| A_51_P124133 | NM_010006 | Cyp2d9   | 13105  | cytochrome P450, family 2, subfamily d, polypeptide 9                         | -3.70 | 0.50 | 0.00 |
| A_51_P331507 | NM_173011 | ldh2     | 269951 | isocitrate dehydrogenase 2 (NADP+), mitochondrial                             | -3.91 | 0.50 | 0.00 |
| A_51_P432659 | NM_008822 | Pex7     | 18634  | peroxisomal biogenesis factor 7                                               | -3.53 | 0.50 | 0.01 |
| A_51_P432851 | NM_177564 | Dhrs11   | 192970 | dehydrogenase/reductase (SDR family) member 11                                | -2.82 | 0.50 | 0.04 |
| A_51_P399873 | NM_001033 | Acmsd    | 266645 | amino carboxymuconate semialdehyde decarboxylase                              | -4.27 | 0.50 | 0.00 |
| A_52_P36928  | NM_194269 | Morn2    | 378462 | MORN repeat containing 2                                                      | -4.57 | 0.50 | 0.00 |
| A_51_P177897 | NM_011665 | Ube2i    | 22196  | ubiquitin-conjugating enzyme E2I                                              | -3.39 | 0.50 | 0.01 |
| A_52_P256421 | NA        | NA       | NA     | NA                                                                            | -6.31 | 0.50 | 0.00 |
| A_51_P109144 | NM_025768 | Grtp1    | 66790  | GH regulated TBC protein 1                                                    | -4.28 | 0.50 | 0.00 |
| A_51_P151433 | NM_026554 | Ncbp2    | 68092  | nuclear cap binding protein subunit 2                                         | -3.44 | 0.50 | 0.01 |
| A_51_P393999 | NM_031375 | Ngrn     | 83485  | neugrin, neurite outgrowth associated                                         | -2.76 | 0.50 | 0.05 |
| A_51_P211491 | NM_010368 | Gusb     | 110006 | glucuronidase, beta                                                           | -3.41 | 0.50 | 0.01 |
| A_51_P366138 | NM_008587 | Mertk    | 17289  | c-mer proto-oncogene tyrosine kinase                                          | -2.85 | 0.50 | 0.03 |
| A_51_P452875 | NA        | NA       | NA     | NA                                                                            | -2.77 | 0.50 | 0.04 |
| A_52_P368945 | AK134567  | Skap2    | 54353  | src family associated phosphoprotein 2                                        | -3.31 | 0.50 | 0.01 |
| A_51_P121206 | NM_015753 | Zeb2     | 24136  | zinc finger E-box binding homeobox 2                                          | -2.90 | 0.50 | 0.03 |
| A_51_P211998 | NM_028943 | Sgms2    | 74442  | sphingomyelin synthase 2                                                      | -2.61 | 0.50 | 0.07 |
| A_52_P603290 | AB015858  | Mycbp    | 56309  | c-myc binding protein                                                         | -5.49 | 0.50 | 0.00 |
| A_51_P507942 | NM_029097 | Atp13a2  | 74772  | ATPase type 13A2                                                              | -3.95 | 0.50 | 0.00 |
| A_51_P104006 | NM_011174 | Prh1     | 19131  | proline rich protein HaellI subfamily 1                                       | -4.43 | 0.50 | 0.00 |
| A_52_P611798 | NM_007840 | Ddx5     | 13207  | DEAD (Asp-Glu-Ala-Asp) box polypeptide 5                                      | -4.41 | 0.50 | 0.00 |
| A_52_P125485 | NM_177809 | AU042651 | 328258 | expressed sequence AU042651                                                   | -3.15 | 0.50 | 0.01 |
| A_51_P136022 | NM_023585 | Ube2v2   | 70620  | ubiquitin-conjugating enzyme E2 variant 2                                     | -3.05 | 0.50 | 0.02 |
| A_51_P211880 | NM_030026 | Mccc2    | 78038  | methylcrotonoyl-Coenzyme A carboxylase 2 (beta)                               | -3.22 | 0.50 | 0.01 |
| A_52_P99082  | NA        | NA       | NA     | NA                                                                            | -3.39 | 0.50 | 0.01 |
| A_51_P169867 | NM_011894 | Sh3bp5   | 24056  | SH3-domain binding protein 5 (BTK-associated)                                 | -4.31 | 0.50 | 0.00 |
| A_52_P323044 | NM_010439 | Hmgb1    | 15289  | high mobility group box 1                                                     | -5.03 | 0.50 | 0.00 |

|              |           |           |        |                                                                                                                     |       |      |      |
|--------------|-----------|-----------|--------|---------------------------------------------------------------------------------------------------------------------|-------|------|------|
| A_52_P224413 | XR_004220 | NA        | NA     | NA                                                                                                                  | -2.91 | 0.50 | 0.03 |
| A_52_P406507 | NM_027877 | Mus81     | 71711  | MUS81 endonuclease homolog (yeast)                                                                                  | -3.53 | 0.50 | 0.01 |
| A_52_P328621 | NA        | NA        | NA     | NA                                                                                                                  | -3.41 | 0.50 | 0.01 |
| A_52_P167735 | NA        | NA        | NA     | NA                                                                                                                  | -3.18 | 0.50 | 0.01 |
| A_51_P367136 | BC029185  | Foxn3     | 71375  | forkhead box N3                                                                                                     | -4.54 | 0.50 | 0.00 |
| A_52_P129443 | NM_145425 | AV249152  | 216560 | expressed sequence AV249152                                                                                         | -3.72 | 0.50 | 0.00 |
| A_51_P165984 | NM_007517 | Aup1      | 11993  | ancient ubiquitous protein 1                                                                                        | -4.89 | 0.50 | 0.00 |
| A_52_P487483 | NM_011822 | Pigq      | 14755  | phosphatidylinositol glycan anchor biosynthesis, class Q                                                            | -2.95 | 0.50 | 0.02 |
| A_51_P408363 | NM_008823 | Cfp       | 18636  | complement factor properdin                                                                                         | -3.34 | 0.50 | 0.01 |
| A_52_P562676 | NM_013873 | Sult4a1   | 29859  | sulfotransferase family 4A, member 1                                                                                | -3.60 | 0.50 | 0.01 |
| A_52_P483280 | NM_010685 | Lamp2     | 16784  | lysosomal-associated membrane protein 2                                                                             | -4.09 | 0.50 | 0.00 |
| A_51_P348548 | NM_012029 | Ecsit     | 26940  | ECSIT homolog (Drosophila)                                                                                          | -3.04 | 0.50 | 0.02 |
| A_52_P625111 | XM_923330 | NA        | NA     | NA                                                                                                                  | -3.33 | 0.50 | 0.01 |
| A_52_P54325  | NM_172600 | 6720456H2 | 218989 | RIKEN cDNA 6720456H20 gene                                                                                          | -2.73 | 0.50 | 0.05 |
| A_51_P350048 | NM_010361 | Gstt2     | 14872  | glutathione S-transferase, theta 2                                                                                  | -3.94 | 0.50 | 0.00 |
| A_52_P59457  | NM_018879 | Tusc4     | 56032  | tumor suppressor candidate 4                                                                                        | -3.01 | 0.50 | 0.02 |
| A_52_P573970 | BC024096  | Pex11c    | 69129  | peroxisomal biogenesis factor 11 gamma<br>leucine-rich repeat, immunoglobulin-like and                              | -3.78 | 0.50 | 0.00 |
| A_52_P175199 | NM_173418 | Lrit2     | 239038 | transmembrane domains 2                                                                                             | -4.67 | 0.50 | 0.00 |
| A_51_P441970 | NM_175162 | Stox2     | 71069  | storkhead box 2                                                                                                     | -3.83 | 0.50 | 0.00 |
| A_51_P506045 | NM_176073 | Pgcp      | 54381  | plasma glutamate carboxypeptidase                                                                                   | -4.09 | 0.50 | 0.00 |
| A_51_P366960 | NM_016763 | Hsd17b10  | 15108  | hydroxysteroid (17-beta) dehydrogenase 10                                                                           | -4.57 | 0.50 | 0.00 |
| A_52_P796840 | NM_001025 | BC026782  | 545366 | cDNA sequence BC026782                                                                                              | -3.70 | 0.50 | 0.00 |
| A_51_P472488 | NM_019836 | 2610024G1 | 156412 | RIKEN cDNA 2610024G14 gene<br>acetyl-Coenzyme A acyltransferase 2 (mitochondrial 3-<br>oxoacyl-Coenzyme A thiolase) | -4.13 | 0.50 | 0.00 |
| A_51_P125260 | NM_177470 | Acaa2     | 52538  | oxoacyl-Coenzyme A thiolase)                                                                                        | -3.86 | 0.50 | 0.00 |
| A_51_P408382 | NM_001005 | Itgb4     | 192897 | integrin beta 4<br>NADH dehydrogenase (ubiquinone) 1 alpha subcomplex,<br>assembly factor 1                         | -4.12 | 0.50 | 0.00 |
| A_51_P176854 | NM_027175 | Ndufaf1   | 69702  | assembly factor 1                                                                                                   | -5.10 | 0.50 | 0.00 |
| A_52_P211063 | NM_025415 | Cks2      | 66197  | CDC28 protein kinase regulatory subunit 2                                                                           | -2.70 | 0.50 | 0.05 |
| A_51_P134551 | NM_026452 | Coq9      | 67914  | coenzyme Q9 homolog (yeast)                                                                                         | -3.98 | 0.50 | 0.00 |
| A_52_P335984 | NM_001079 | Syne1     | 64009  | synaptic nuclear envelope 1                                                                                         | -3.62 | 0.49 | 0.00 |
| A_51_P120239 | NM_008986 | Ptrf      | 19285  | polymerase I and transcript release factor                                                                          | -3.85 | 0.49 | 0.00 |

|              |           |           |        |                                                                                                  |       |      |      |
|--------------|-----------|-----------|--------|--------------------------------------------------------------------------------------------------|-------|------|------|
| A_51_P312348 | AK002434  | Krt7      | 110310 | keratin 7                                                                                        | -3.11 | 0.49 | 0.01 |
| A_52_P534235 | NM_011481 | Srms      | 20811  | src-related kinase lacking C-terminal regulatory tyrosine and N-terminal myristylation sites     | -5.13 | 0.49 | 0.00 |
| A_52_P395528 | NA        | NA        | NA     | NA                                                                                               | -2.75 | 0.49 | 0.05 |
| A_51_P338563 | AK017918  | Slc36a1   | 215335 | solute carrier family 36 (proton/amino acid symporter), member 1                                 | -3.10 | 0.49 | 0.02 |
| A_52_P120740 | BC066053  | 0610030E2 | 68364  | RIKEN cDNA 0610030E20 gene                                                                       | -3.57 | 0.49 | 0.01 |
| A_51_P210603 | NM_130882 | Cyp4f13   | 170716 | cytochrome P450, family 4, subfamily f, polypeptide 13                                           | -5.95 | 0.49 | 0.00 |
| A_52_P582767 | NM_024436 | Rab22a    | 19334  | RAB22A, member RAS oncogene family                                                               | -3.64 | 0.49 | 0.00 |
| A_51_P200610 | NM_198886 | Zbtb12    | 193736 | zinc finger and BTB domain containing 12                                                         | -2.78 | 0.49 | 0.04 |
| A_51_P176912 | NM_139145 | Hlcs      | 110948 | holocarboxylase synthetase (biotin- [propionyl-Coenzyme A-carboxylase (ATP-hydrolysing)] ligase) | -3.20 | 0.49 | 0.01 |
| A_51_P203138 | NM_007989 | Foxh1     | 14106  | forkhead box H1                                                                                  | -3.25 | 0.49 | 0.01 |
| A_51_P162313 | NM_183099 | Tssk5     | 73542  | testis-specific serine kinase 5                                                                  | -4.78 | 0.49 | 0.00 |
| A_52_P18922  | NM_026522 | Chid1     | 68038  | chitinase domain containing 1                                                                    | -4.55 | 0.49 | 0.00 |
| A_51_P329332 | NM_054087 | Slc19a2   | 116914 | solute carrier family 19 (thiamine transporter), member 2                                        | -3.53 | 0.49 | 0.01 |
| A_52_P440599 | NM_023622 | Rgl3      | 71746  | ral guanine nucleotide dissociation stimulator-like 3                                            | -2.78 | 0.49 | 0.04 |
| A_51_P188704 | AK170263  | Unc13a    | 382018 | unc-13 homolog A (C. elegans)                                                                    | -4.28 | 0.49 | 0.00 |
| A_51_P509012 | NM_078479 | Mrps21    | 66292  | mitochondrial ribosomal protein S21                                                              | -5.06 | 0.49 | 0.00 |
| A_51_P517215 | NM_016719 | Grb14     | 50915  | growth factor receptor bound protein 14                                                          | -2.90 | 0.49 | 0.03 |
| A_52_P257502 | NM_010517 | Igfbp4    | 16010  | insulin-like growth factor binding protein 4                                                     | -3.47 | 0.49 | 0.01 |
| A_51_P155313 | NM_010362 | Gsto1     | 14873  | glutathione S-transferase omega 1                                                                | -3.80 | 0.49 | 0.00 |
| A_52_P599014 | NM_207682 | Kif1b     | 16561  | kinesin family member 1B                                                                         | -3.53 | 0.49 | 0.01 |
| A_52_P311597 | NM_144852 | Slc7a4    | 224022 | solute carrier family 7 (cationic amino acid transporter, y+ system), member 4                   | -3.76 | 0.49 | 0.00 |
| A_51_P248999 | NM_054040 | Tulp4     | 68842  | tubby like protein 4                                                                             | -2.87 | 0.49 | 0.03 |
| A_51_P125009 | NM_021495 | Pvrl3     | 58998  | poliovirus receptor-related 3                                                                    | -5.75 | 0.49 | 0.00 |
| A_52_P517063 | NM_053122 | Immp2l    | 93757  | IMP2 inner mitochondrial membrane peptidase-like (S. cerevisiae)                                 | -3.45 | 0.49 | 0.01 |
| A_52_P24076  | NM_001040 | Mtmt7     | 54384  | myotubularin related protein 7                                                                   | -4.65 | 0.49 | 0.00 |

|              |           |           |        |                                                                                           |       |      |      |
|--------------|-----------|-----------|--------|-------------------------------------------------------------------------------------------|-------|------|------|
| A_51_P130110 | NM_130884 | ldh3b     | 170718 | isocitrate dehydrogenase 3 (NAD+) beta                                                    | -4.34 | 0.49 | 0.00 |
| A_52_P282858 | NM_207213 | Snx25     | 102141 | sorting nexin 25                                                                          | -4.27 | 0.49 | 0.00 |
| A_52_P407796 | NM_008618 | Mdh1      | 17449  | malate dehydrogenase 1, NAD (soluble)                                                     | -3.71 | 0.49 | 0.00 |
| A_52_P364970 | NM_181391 | Chchd7    | 66433  | coiled-coil-helix-coiled-coil-helix domain containing 7                                   | -3.79 | 0.49 | 0.00 |
| A_52_P488092 | AK147510  | Etl4      | 208618 | enhancer trap locus 4                                                                     | -3.50 | 0.49 | 0.01 |
| A_52_P35164  | NM_001024 | Trp53i13  | 216964 | transformation related protein 53 inducible protein 13                                    | -5.65 | 0.49 | 0.00 |
| A_52_P81210  | NM_007868 | Dmd       | 13405  | dystrophin, muscular dystrophy                                                            | -2.99 | 0.49 | 0.02 |
| A_52_P453778 | XM_620640 | NA        | NA     | NA                                                                                        | -4.60 | 0.49 | 0.00 |
| A_52_P458524 | XR_002277 | NA        | NA     | NA                                                                                        | -7.09 | 0.49 | 0.00 |
| A_51_P150044 | NM_009097 | Rps6ka1   | 20111  | ribosomal protein S6 kinase polypeptide 1                                                 | -3.66 | 0.49 | 0.00 |
| A_51_P392134 | NM_080560 | Ube2n     | 93765  | ubiquitin-conjugating enzyme E2N                                                          | -4.54 | 0.49 | 0.00 |
| A_52_P269003 | NM_008684 | Neo1      | 18007  | neogenin                                                                                  | -4.46 | 0.49 | 0.00 |
| A_51_P293729 | NM_054102 | Ivns1abp  | 117198 | influenza virus NS1A binding protein                                                      | -3.56 | 0.49 | 0.01 |
| A_52_P426503 | NM_145919 | Abhd14a   | 68644  | abhydrolase domain containing 14A                                                         | -4.30 | 0.49 | 0.00 |
| A_52_P181733 | NM_153560 | Fam102a   | 98952  | family with sequence similarity 102, member A                                             | -2.78 | 0.49 | 0.04 |
| A_52_P74653  | NM_001039 | Cnm3      | 94218  | cyclin M3                                                                                 | -4.86 | 0.49 | 0.00 |
| A_51_P329370 | NM_030093 | Snrnp25   | 78372  | small nuclear ribonucleoprotein 25 (U11/U12)                                              | -3.68 | 0.49 | 0.00 |
| A_51_P208931 | NM_145974 | C330016O1 | 212706 | RIKEN cDNA C330016O10 gene                                                                | -3.69 | 0.49 | 0.00 |
| A_52_P72654  | NM_011399 | Slc25a17  | 20524  | solute carrier family 25 (mitochondrial carrier, peroxisomal membrane protein), member 17 | -3.56 | 0.49 | 0.01 |
| A_51_P283151 | NM_028995 | Nipal3    | 74552  | NIPA-like domain containing 3                                                             | -2.85 | 0.49 | 0.03 |
| A_51_P108489 | NM_008187 | Gtl3      | 14894  | gene trap locus 3                                                                         | -3.96 | 0.49 | 0.00 |
| A_52_P643375 | BC075715  | Dmpk      | 13400  | dystrophia myotonica-protein kinase                                                       | -3.61 | 0.49 | 0.01 |
| A_51_P265106 | NM_145614 | Dlat      | 235339 | dihydrolipoamide S-acetyltransferase (E2 component of pyruvate dehydrogenase complex)     | -4.57 | 0.49 | 0.00 |
| A_51_P146432 | NM_175392 | Fam73b    | 108958 | family with sequence similarity 73, member B                                              | -2.62 | 0.49 | 0.07 |
| A_51_P138972 | NM_013929 | Siva1     | 30954  | SIVA1, apoptosis-inducing factor                                                          | -2.92 | 0.49 | 0.03 |
| A_51_P220723 | NM_026592 | B230118H0 | 68170  | RIKEN cDNA B230118H07 gene                                                                | -3.06 | 0.49 | 0.02 |
| A_51_P517075 | NM_011340 | Serpinf1  | 20317  | serine (or cysteine) peptidase inhibitor, clade F, member 1                               | -5.54 | 0.49 | 0.00 |
| A_52_P59264  | NM_026408 | Sncaip    | 67847  | synuclein, alpha interacting protein (synphilin)                                          | -4.58 | 0.49 | 0.00 |

|               |           |           |        |                                                                                                                          |       |      |      |
|---------------|-----------|-----------|--------|--------------------------------------------------------------------------------------------------------------------------|-------|------|------|
| A_51_P251639  | NM_032543 | Rnf123    | 84585  | ring finger protein 123<br>splA/ryanodine receptor domain and SOCS box<br>containing 2                                   | -5.73 | 0.49 | 0.00 |
| A_51_P410101  | NM_013539 | Spsb2     | 14794  | RIKEN cDNA 9430023L20 gene                                                                                               | -3.51 | 0.49 | 0.01 |
| A_51_P175758  | NM_026566 | 9430023L2 | 68118  |                                                                                                                          | -4.67 | 0.49 | 0.00 |
| A_51_P174396  | NM_012019 | Aifm1     | 26926  | apoptosis-inducing factor, mitochondrion-associated 1                                                                    | -3.51 | 0.49 | 0.01 |
| A_51_P400375  | NM_021446 | 0610007P1 | 58520  | RIKEN cDNA 0610007P14 gene                                                                                               | -3.18 | 0.49 | 0.01 |
| A_51_P107326  | NM_024188 | Oxct1     | 67041  | 3-oxoacid CoA transferase 1                                                                                              | -2.72 | 0.49 | 0.05 |
| A_51_P448056  | AK031405  | Mospd2    | 76763  | motile sperm domain containing 2                                                                                         | -3.30 | 0.49 | 0.01 |
| A_52_P429106  | NM_027278 | 2810432D0 | 69961  | RIKEN cDNA 2810432D09 gene                                                                                               | -3.25 | 0.49 | 0.01 |
| A_51_P454447  | NM_028505 | 1700040I0 | 73327  | RIKEN cDNA 1700040I03 gene                                                                                               | -4.57 | 0.49 | 0.00 |
| A_52_P180335  | NM_024227 | Mrpl28    | 68611  | mitochondrial ribosomal protein L28                                                                                      | -7.54 | 0.49 | 0.00 |
| A_52_P1156465 | AK083162  | Mbd2      | 17191  | methyl-CpG binding domain protein 2                                                                                      | -4.21 | 0.49 | 0.00 |
| A_52_P917365  | AV141866  | NA        | NA     | NA                                                                                                                       | -5.87 | 0.49 | 0.00 |
| A_51_P457259  | NM_009214 | Sms       | 20603  | spermine synthase<br>required for meiotic nuclear division 1 homolog (S.<br>cerevisiae)                                  | -3.95 | 0.49 | 0.00 |
| A_51_P147562  | NM_025343 | Rmnd1     | 66084  | hepsin                                                                                                                   | -3.59 | 0.49 | 0.01 |
| A_51_P434483  | NM_008281 | Hpn       | 15451  | COX19 cytochrome c oxidase assembly homolog (S.<br>cerevisiae)                                                           | -3.34 | 0.49 | 0.01 |
| A_51_P413687  | BI905520  | Cox19     | 68033  |                                                                                                                          | -4.37 | 0.49 | 0.00 |
| A_52_P170054  | NM_030087 | Ndufv3    | 78330  | NADH dehydrogenase (ubiquinone) flavoprotein 3<br>translocase of outer mitochondrial membrane 40<br>homolog-like (yeast) | -6.39 | 0.49 | 0.00 |
| A_52_P86003   | NM_001037 | Tomm40l   | 641376 |                                                                                                                          | -2.67 | 0.49 | 0.05 |
| A_52_P402897  | AK038529  | Cdh4      | 12561  | cadherin 4                                                                                                               | -3.39 | 0.49 | 0.01 |
| A_51_P116932  | NM_133664 | Lad1      | 16763  | ladinin                                                                                                                  | -2.99 | 0.49 | 0.02 |
| A_52_P582059  | NM_013590 | Lyz1      | 17110  | lysozyme 1                                                                                                               | -2.87 | 0.49 | 0.03 |
| A_51_P259968  | NM_023113 | Aspa      | 11484  | aspartoacylase                                                                                                           | -3.05 | 0.49 | 0.02 |
| A_52_P546421  | NM_013839 | Nr1h3     | 22259  | nuclear receptor subfamily 1, group H, member 3                                                                          | -3.23 | 0.49 | 0.01 |
| A_52_P55772   | NM_009325 | Tbxa2r    | 21390  | thromboxane A2 receptor                                                                                                  | -3.65 | 0.49 | 0.00 |
| A_52_P893440  | NM_011563 | Prdx2     | 21672  | peroxiredoxin 2                                                                                                          | -7.07 | 0.49 | 0.00 |
| A_52_P89273   | AK051905  | Cbx8      | 30951  | chromobox homolog 8 (Drosophila Pc class)                                                                                | -4.03 | 0.49 | 0.00 |
| A_51_P413965  | DV056587  | NA        | NA     | NA                                                                                                                       | -3.70 | 0.49 | 0.00 |
| A_51_P279127  | NM_145410 | Fam173a   | 214917 | family with sequence similarity 173, member A                                                                            | -4.95 | 0.49 | 0.00 |

|              |           |           |        |                                                                  |       |      |      |
|--------------|-----------|-----------|--------|------------------------------------------------------------------|-------|------|------|
| A_52_P338199 | NM_026378 | Dalrd3    | 67789  | DALR anticodon binding domain containing 3                       | -4.58 | 0.49 | 0.00 |
| A_52_P217739 | AK038969  | 5033411D1 | 192136 | RIKEN cDNA 5033411D12 gene                                       | -2.82 | 0.49 | 0.04 |
| A_51_P344376 | NM_013533 | Gpr162    | 14788  | G protein-coupled receptor 162                                   | -4.27 | 0.49 | 0.00 |
| A_51_P481721 | NM_016771 | Sult1d1   | 53315  | sulfotransferase family 1D, member 1                             | -3.57 | 0.49 | 0.01 |
| A_52_P134899 | NM_001044 | Zfp2      | 22678  | zinc finger protein 2                                            | -6.38 | 0.49 | 0.00 |
| A_51_P229325 | NM_027188 | Smyd3     | 69726  | SET and MYND domain containing 3                                 | -2.76 | 0.49 | 0.05 |
| A_51_P340816 | NM_008389 | Ipp       | 16351  | IAP promoted placental gene                                      | -2.87 | 0.49 | 0.03 |
| A_52_P637172 | AK154222  | Pyroxd2   | 74580  | pyridine nucleotide-disulphide oxidoreductase domain 2           | -4.80 | 0.49 | 0.00 |
| A_52_P175190 | AK033431  | Egfr      | 13649  | epidermal growth factor receptor                                 | -2.97 | 0.49 | 0.02 |
| A_51_P477941 | NM_013907 | Fbxw4     | 30838  | F-box and WD-40 domain protein 4                                 | -3.64 | 0.49 | 0.00 |
| A_52_P225331 | NM_024438 | Dusp19    | 68082  | dual specificity phosphatase 19                                  | -3.28 | 0.49 | 0.01 |
| A_52_P565279 | NM_144815 | Cecr5     | 214932 | cat eye syndrome chromosome region, candidate 5 homolog (human)  | -4.04 | 0.49 | 0.00 |
| A_51_P423825 | NA        | NA        | NA     | NA                                                               | -5.52 | 0.49 | 0.00 |
| A_52_P10458  | NM_011543 | Skp1a     | 21402  | S-phase kinase-associated protein 1A                             | -5.23 | 0.49 | 0.00 |
| A_51_P212801 | NM_019668 | Ube2a     | 22209  | ubiquitin-conjugating enzyme E2A, RAD6 homolog (S. cerevisiae)   | -4.23 | 0.49 | 0.00 |
| A_52_P367745 | NM_007383 | Acads     | 11409  | acyl-Coenzyme A dehydrogenase, short chain                       | -5.89 | 0.49 | 0.00 |
| A_51_P360262 | NM_053122 | Imp2l     | 93757  | IMP2 inner mitochondrial membrane peptidase-like (S. cerevisiae) | -3.65 | 0.48 | 0.00 |
| A_51_P393761 | NM_153064 | Ndufs2    | 226646 | NADH dehydrogenase (ubiquinone) Fe-S protein 2                   | -5.25 | 0.48 | 0.00 |
| A_51_P410949 | BC066818  | Polr3g    | 67486  | polymerase (RNA) III (DNA directed) polypeptide G                | -3.40 | 0.48 | 0.01 |
| A_51_P392577 | NM_173763 | Ccbl2     | 229905 | cysteine conjugate-beta lyase 2                                  | -3.26 | 0.48 | 0.01 |
| A_52_P540855 | NM_007453 | Prdx6     | 11758  | peroxiredoxin 6                                                  | -5.44 | 0.48 | 0.00 |
| A_51_P134627 | NM_080857 | Asb13     | 142688 | ankyrin repeat and SOCS box-containing 13                        | -3.07 | 0.48 | 0.02 |
| A_51_P172155 | NM_010401 | Hal       | 15109  | histidine ammonia lyase                                          | -3.82 | 0.48 | 0.00 |
| A_51_P365468 | NM_009191 | Clpb      | 20480  | ClpB caseinolytic peptidase B homolog (E. coli)                  | -5.55 | 0.48 | 0.00 |
| A_51_P475613 | NM_029629 | Fahd2a    | 68126  | fumarylacetoacetate hydrolase domain containing 2A               | -5.21 | 0.48 | 0.00 |
| A_52_P559817 | NM_024237 | Fbln7     | 70370  | fibulin 7                                                        | -3.04 | 0.48 | 0.02 |
| A_51_P310629 | NM_023114 | Apoc3     | 11814  | apolipoprotein C-III                                             | -2.84 | 0.48 | 0.03 |

|              |           |                 |        |                                                                |       |      |      |
|--------------|-----------|-----------------|--------|----------------------------------------------------------------|-------|------|------|
| A_51_P425047 | NM_026838 | Srpx2           | 68792  | sushi-repeat-containing protein, X-linked 2                    | -5.55 | 0.48 | 0.00 |
| A_51_P256323 | AK220156  | Lpin2           | 64898  | lipin 2                                                        | -3.14 | 0.48 | 0.01 |
| A_51_P235297 | NM_172391 | Ahsa2           | 268390 | AHA1, activator of heat shock protein ATPase homolog 2 (yeast) | -4.70 | 0.48 | 0.00 |
| A_52_P359739 | NM_026384 | Dgat2           | 67800  | diacylglycerol O-acyltransferase 2                             | -4.20 | 0.48 | 0.00 |
| A_51_P492446 | NM_172401 | 1110057K068832  |        | RIKEN cDNA 1110057K04 gene                                     | -3.51 | 0.48 | 0.01 |
| A_52_P247282 | AK172999  | Tbc1d9b         | 76795  | TBC1 domain family, member 9B                                  | -2.76 | 0.48 | 0.05 |
| A_51_P485791 | NM_020010 | Cyp51           | 13121  | cytochrome P450, family 51                                     | -3.24 | 0.48 | 0.01 |
| A_51_P391367 | NM_031182 | Tcfap4          | 83383  | transcription factor AP4                                       | -4.97 | 0.48 | 0.00 |
| A_51_P393469 | XM_001002 | Wdr81           | 192652 | WD repeat domain 81                                            | -3.73 | 0.48 | 0.00 |
| A_51_P338705 | NM_181404 | Kank1           | 107351 | KN motif and ankyrin repeat domains 1                          | -3.96 | 0.48 | 0.00 |
| A_51_P274173 | Z19521    | Ldlr            | 16835  | low density lipoprotein receptor                               | -3.39 | 0.48 | 0.01 |
| A_51_P214557 | NM_010959 | Oit3            | 18302  | oncoprotein induced transcript 3                               | -3.35 | 0.48 | 0.01 |
| A_52_P537696 | NM_145524 | Mettl8          | 228019 | methyltransferase like 8                                       | -3.79 | 0.48 | 0.00 |
| A_52_P198727 | NM_026431 | 1810043G067884  |        | RIKEN cDNA 1810043G02 gene                                     | -5.48 | 0.48 | 0.00 |
| A_51_P191700 | NM_009929 | Col18a1         | 12822  | collagen, type XVIII, alpha 1                                  | -6.98 | 0.48 | 0.00 |
| A_52_P308413 | AK007434  | 1810011H169069  |        | RIKEN cDNA 1810011H11 gene                                     | -4.60 | 0.48 | 0.00 |
| A_52_P436628 | NM_011697 | Vegfb           | 22340  | vascular endothelial growth factor B                           | -3.67 | 0.48 | 0.00 |
| A_52_P67088  | NM_019731 | Nme4            | 56520  | non-metastatic cells 4, protein expressed in                   | -4.96 | 0.48 | 0.00 |
| A_51_P265905 | BC066035  | Zranb3          | 226409 | zinc finger, RAN-binding domain containing 3                   | -5.32 | 0.48 | 0.00 |
| A_52_P281909 | AK015982  | 493053511675220 |        | RIKEN cDNA 4930535116 gene                                     | -4.88 | 0.48 | 0.00 |
| A_51_P311319 | NM_029022 | Scrn3           | 74616  | secernin 3                                                     | -3.95 | 0.48 | 0.00 |
| A_52_P660047 | AK143964  | 1810034E166503  |        | RIKEN cDNA 1810034E14 gene                                     | -4.50 | 0.48 | 0.00 |
| A_52_P76402  | BC027783  | Eif2c1          | 236511 | eukaryotic translation initiation factor 2C, 1                 | -4.16 | 0.48 | 0.00 |
| A_52_P620399 | NM_009697 | Nr2f2           | 11819  | nuclear receptor subfamily 2, group F, member 2                | -3.93 | 0.48 | 0.00 |
| A_51_P507359 | NM_024479 | Wbscr27         | 79565  | Williams Beuren syndrome chromosome region 27 (human)          | -4.18 | 0.48 | 0.00 |
| A_51_P143142 | NM_027204 | Mrpl12          | 56282  | mitochondrial ribosomal protein L12                            | -3.69 | 0.48 | 0.00 |
| A_52_P681557 | XM_149291 | NA              | NA     | NA                                                             | -2.97 | 0.48 | 0.02 |
| A_51_P234888 | NM_027093 | 2310003L269487  |        | RIKEN cDNA 2310003L22 gene                                     | -4.33 | 0.48 | 0.00 |
| A_51_P423431 | NM_027838 | Senp8           | 71599  | SUMO/sentrin specific peptidase 8                              | -3.00 | 0.48 | 0.02 |
| A_51_P295967 | NM_001042 | Proc            | 19123  | protein C                                                      | -7.25 | 0.48 | 0.00 |
| A_52_P333529 | NM_033314 | Slco2a1         | 24059  | solute carrier organic anion transporter family, member 2a1    | -2.94 | 0.48 | 0.02 |



|              |           |            |        |                                                                                     |       |      |      |
|--------------|-----------|------------|--------|-------------------------------------------------------------------------------------|-------|------|------|
| A_52_P602091 | NM_001037 | Csf1r      | 12978  | colony stimulating factor 1 receptor                                                | -3.18 | 0.48 | 0.01 |
| A_52_P499879 | NM_010363 | Gstz1      | 14874  | glutathione transferase zeta 1 (maleylacetoacetate isomerase)                       | -3.08 | 0.48 | 0.02 |
| A_52_P409769 | NM_194464 | Mrvi1      | 17540  | MRV integration site 1                                                              | -4.95 | 0.48 | 0.00 |
| A_51_P131879 | NM_033587 | Pcdhga4    | 93712  | protocadherin gamma subfamily A, 4                                                  | -4.00 | 0.48 | 0.00 |
| A_51_P363749 | NM_016851 | Irf6       | 54139  | interferon regulatory factor 6                                                      | -4.01 | 0.48 | 0.00 |
| A_51_P337230 | NM_027864 | Galnt14    | 71685  | UDP-N-acetyl-alpha-D-galactosamine:polypeptide N-acetylgalactosaminyltransferase 14 | -2.68 | 0.48 | 0.05 |
| A_51_P245789 | NM_029620 | Pcolce2    | 76477  | procollagen C-endopeptidase enhancer 2                                              | -3.40 | 0.48 | 0.01 |
| A_52_P38029  | BC037640  | Cwf19l1    | 72502  | CWF19-like 1, cell cycle control ( <i>S. pombe</i> )                                | -2.93 | 0.48 | 0.02 |
| A_52_P239742 | BC066054  | BC024659   | 108934 | cDNA sequence BC024659                                                              | -4.89 | 0.48 | 0.00 |
| A_51_P358344 | NM_007732 | Col17a1    | 12821  | collagen, type XVII, alpha 1                                                        | -5.81 | 0.48 | 0.00 |
| A_52_P676063 | NM_026734 | Tmem126b   | 68472  | transmembrane protein 126B                                                          | -3.93 | 0.48 | 0.00 |
| A_51_P517012 | AK005069  | Tysnd1     | 71767  | trypsin domain containing 1                                                         | -3.01 | 0.48 | 0.02 |
| A_51_P211968 | NM_025304 | Lcmt1      | 30949  | leucine carboxyl methyltransferase 1                                                | -4.47 | 0.48 | 0.00 |
| A_51_P144696 | NM_019552 | Abcb10     | 56199  | ATP-binding cassette, sub-family B (MDR/TAP), member 10                             | -3.32 | 0.48 | 0.01 |
| A_52_P63368  | BC066830  | Wdr67      | 210544 | WD repeat domain 67                                                                 | -2.92 | 0.48 | 0.03 |
| A_52_P597427 | AK154023  | Pank2      | 74450  | pantothenate kinase 2 (Hallervorden-Spatz syndrome)                                 | -3.55 | 0.48 | 0.01 |
| A_52_P574945 | AK048993  | 1500026H1  | 69002  | RIKEN cDNA 1500026H17 gene                                                          | -3.63 | 0.48 | 0.00 |
| A_52_P180565 | BC100355  | 2310061I04 | 69662  | RIKEN cDNA 2310061I04 gene                                                          | -3.45 | 0.48 | 0.01 |
| A_51_P417016 | NM_013663 | Sfrs3      | 20383  | splicing factor, arginine/serine-rich 3 (SRp20)                                     | -3.54 | 0.48 | 0.01 |
| A_51_P476418 | BC057368  | Dock6      | 319899 | dedicator of cytokinesis 6                                                          | -4.24 | 0.48 | 0.00 |
| A_51_P435506 | NM_008637 | Nudt1      | 17766  | nudix (nucleoside diphosphate linked moiety X)-type motif 1                         | -3.45 | 0.48 | 0.01 |
| A_52_P369310 | NM_010956 | Ogdh       | 18293  | oxoglutarate dehydrogenase (lipoamide)                                              | -2.79 | 0.48 | 0.04 |
| A_51_P336161 | NM_010764 | Man2b1     | 17159  | mannosidase 2, alpha B1                                                             | -4.65 | 0.48 | 0.00 |
| A_52_P462657 | AK139527  | Gm11545    | 217122 | predicted gene 11545                                                                | -5.07 | 0.48 | 0.00 |
| A_52_P635078 | NM_172668 | Lrp4       | 228357 | low density lipoprotein receptor-related protein 4                                  | -4.29 | 0.48 | 0.00 |
| A_51_P460954 | NM_009139 | Ccl6       | 20305  | chemokine (C-C motif) ligand 6                                                      | -3.45 | 0.48 | 0.01 |
| A_51_P121288 | NM_021527 | Mkks       | 59030  | McKusick-Kaufman syndrome protein                                                   | -3.16 | 0.48 | 0.01 |

|               |           |                 |        |                                                                                                   |       |      |      |
|---------------|-----------|-----------------|--------|---------------------------------------------------------------------------------------------------|-------|------|------|
| A_52_P138656  | NM_008854 | Prkaca          | 18747  | protein kinase, cAMP dependent, catalytic, alpha                                                  | -4.13 | 0.48 | 0.00 |
| A_52_P391805  | NM_028934 | 4930452B074430  |        | RIKEN cDNA 4930452B06 gene                                                                        | -4.33 | 0.48 | 0.00 |
| A_51_P488063  | NM_172122 | Crocc           | 230872 | ciliary rootlet coiled-coil, rootletin                                                            | -4.43 | 0.48 | 0.00 |
| A_51_P369311  | NM_015760 | Nox4            | 50490  | NADPH oxidase 4                                                                                   | -4.53 | 0.48 | 0.00 |
| A_51_P249268  | AK122246  | D130043K2210108 |        | RIKEN cDNA D130043K22 gene                                                                        | -3.08 | 0.48 | 0.02 |
| A_51_P196990  | NM_017404 | Mrpl39          | 27393  | mitochondrial ribosomal protein L39                                                               | -5.33 | 0.48 | 0.00 |
| A_51_P140751  | NM_011397 | Slc23a1         | 20522  | solute carrier family 23 (nucleobase transporters), member 1                                      | -2.83 | 0.48 | 0.04 |
| A_52_P404533  | NM_013560 | Hspb1           | 15507  | heat shock protein 1                                                                              | -4.52 | 0.48 | 0.00 |
| A_51_P332932  | AK016814  | 4933415A075727  |        | RIKEN cDNA 4933415A04 gene                                                                        | -4.16 | 0.48 | 0.00 |
| A_52_P30920   | NM_013761 | Srr             | 27364  | serine racemase                                                                                   | -3.57 | 0.48 | 0.01 |
| A_52_P1052029 | AK031632  | NA              | NA     | NA                                                                                                | -3.97 | 0.48 | 0.00 |
| A_52_P13337   | NA        | NA              | NA     | NA                                                                                                | -3.81 | 0.48 | 0.00 |
| A_52_P280425  | BU530502  | NA              | NA     | NA                                                                                                | -3.36 | 0.48 | 0.01 |
| A_52_P17556   | NM_134249 | Timd2           | 171284 | T-cell immunoglobulin and mucin domain containing 2                                               | -3.09 | 0.48 | 0.02 |
| A_52_P483336  | NM_007641 | Ms4a1           | 12482  | membrane-spanning 4-domains, subfamily A, member 1                                                | -2.68 | 0.48 | 0.05 |
| A_52_P1179483 | AK015079  | 4930404H173815  |        | RIKEN cDNA 4930404H11 gene                                                                        | -5.21 | 0.48 | 0.00 |
| A_52_P440284  | BC075618  | Mxra7           | 67622  | matrix-remodelling associated 7                                                                   | -3.47 | 0.48 | 0.01 |
| A_51_P138502  | BC002262  | Ttc28           | 209683 | tetratricopeptide repeat domain 28                                                                | -5.62 | 0.48 | 0.00 |
| A_51_P167452  | AK049330  | Snap47          | 67826  | synaptosomal-associated protein, 47                                                               | -3.32 | 0.48 | 0.01 |
| A_52_P480088  | NM_025685 | Col27a1         | 373864 | collagen, type XXVII, alpha 1                                                                     | -3.05 | 0.48 | 0.02 |
| A_52_P213220  | NA        | NA              | NA     | NA                                                                                                | -3.04 | 0.48 | 0.02 |
| A_51_P180140  | NM_175663 | Hist1h2ba       | 319177 | histone cluster 1, H2ba                                                                           | -3.01 | 0.48 | 0.02 |
| A_51_P178063  | NM_009025 | Rasa3           | 19414  | RAS p21 protein activator 3                                                                       | -5.30 | 0.48 | 0.00 |
| A_52_P422755  | NM_030145 | Lsm6            | 78651  | LSM6 homolog, U6 small nuclear RNA associated (S. cerevisiae)                                     | -6.39 | 0.48 | 0.00 |
| A_51_P480046  | NM_001026 | Entpd5          | 12499  | ectonucleoside triphosphate diphosphohydrolase 5                                                  | -2.76 | 0.48 | 0.05 |
| A_51_P184197  | NM_031878 | Smarcd2         | 83796  | SWI/SNF related, matrix associated, actin dependent regulator of chromatin, subfamily d, member 2 | -5.73 | 0.48 | 0.00 |
| A_51_P520936  | NM_013867 | Bcar3           | 29815  | breast cancer anti-estrogen resistance 3                                                          | -2.90 | 0.48 | 0.03 |

|              |           |            |        |                                                                                                                                    |       |      |      |
|--------------|-----------|------------|--------|------------------------------------------------------------------------------------------------------------------------------------|-------|------|------|
| A_52_P459288 | AK050350  | NA         | NA     | NA                                                                                                                                 | -2.73 | 0.48 | 0.05 |
| A_52_P191341 | AK078042  | Naa15      | 74838  | N(alpha)-acetyltransferase 15, NatA auxiliary subunit                                                                              | -4.02 | 0.48 | 0.00 |
| A_52_P3723   | BC096542  | Nfib       | 18028  | nuclear factor I/B                                                                                                                 | -3.19 | 0.48 | 0.01 |
| A_52_P398158 | NM_146173 | Tspan33    | 232670 | tetraspanin 33                                                                                                                     | -5.73 | 0.47 | 0.00 |
| A_51_P399853 | NM_133218 | Zfp704     | 170753 | zinc finger protein 704                                                                                                            | -3.35 | 0.47 | 0.01 |
| A_52_P409055 | BC078641  | Dcaf8      | 98193  | DDB1 and CUL4 associated factor 8                                                                                                  | -4.90 | 0.47 | 0.00 |
| A_52_P301821 | NM_053078 | D0H4S114   | 27528  | DNA segment, human D4S114                                                                                                          | -6.65 | 0.47 | 0.00 |
| A_51_P273928 | AK039851  | Kdm2a      | 225876 | lysine (K)-specific demethylase 2A                                                                                                 | -6.11 | 0.47 | 0.00 |
| A_52_P268720 | AK020667  | Helz       | 78455  | helicase with zinc finger domain<br>endonuclease/exonuclease/phosphatase family domain<br>containing 1                             | -3.90 | 0.47 | 0.00 |
| A_51_P317191 | NM_026189 | Eepd1      | 67484  | containing 1                                                                                                                       | -3.32 | 0.47 | 0.01 |
| A_52_P877015 | BC089035  | Thrb       | 21834  | thyroid hormone receptor beta                                                                                                      | -4.43 | 0.47 | 0.00 |
| A_51_P495767 | NM_011948 | Map3k4     | 26407  | mitogen-activated protein kinase kinase kinase 4                                                                                   | -6.25 | 0.47 | 0.00 |
| A_52_P68419  | NM_175164 | Arhgap26   | 71302  | Rho GTPase activating protein 26                                                                                                   | -4.97 | 0.47 | 0.00 |
| A_52_P108808 | NA        | NA         | NA     | NA                                                                                                                                 | -5.16 | 0.47 | 0.00 |
| A_52_P513347 | NM_199446 | Phkb       | 102093 | phosphorylase kinase beta                                                                                                          | -3.23 | 0.47 | 0.01 |
| A_51_P310548 | NM_133676 | Osgep      | 66246  | O-sialoglycoprotein endopeptidase                                                                                                  | -5.49 | 0.47 | 0.00 |
| A_51_P382121 | NM_145517 | Ormdl1     | 227102 | ORM1-like 1 ( <i>S. cerevisiae</i> )                                                                                               | -3.91 | 0.47 | 0.00 |
| A_52_P279651 | NM_019778 | Zbtb20     | 56490  | zinc finger and BTB domain containing 20                                                                                           | -3.75 | 0.47 | 0.00 |
| A_52_P384594 | AK090134  | Anapc1     | 17222  | anaphase promoting complex subunit 1                                                                                               | -3.26 | 0.47 | 0.01 |
| A_51_P220681 | NM_009657 | Aldoc      | 11676  | aldolase C, fructose-bisphosphate                                                                                                  | -3.91 | 0.47 | 0.00 |
| A_52_P421096 | NM_029752 | Bri3bp     | 76809  | Bri3 binding protein                                                                                                               | -4.20 | 0.47 | 0.00 |
| A_51_P362104 | NM_032003 | Enpp5      | 83965  | ectonucleotide pyrophosphatase/phosphodiesterase 5                                                                                 | -4.24 | 0.47 | 0.00 |
| A_51_P474188 | NM_198942 | Dhx57      | 106794 | DEAH (Asp-Glu-Ala-Asp/His) box polypeptide 57                                                                                      | -3.36 | 0.47 | 0.01 |
| A_51_P313855 | NM_183408 | Pde4a      | 18577  | phosphodiesterase 4A, cAMP specific                                                                                                | -6.60 | 0.47 | 0.00 |
| A_52_P527463 | NM_145959 | D15Erttd62 | 210998 | DNA segment, Chr 15, ERATO Doi 621, expressed                                                                                      | -3.59 | 0.47 | 0.01 |
| A_51_P391897 | NM_146290 | Olf125     | 258287 | olfactory receptor 125                                                                                                             | -4.56 | 0.47 | 0.00 |
| A_52_P321325 | AK161741  | Zhx3       | 320799 | zinc fingers and homeoboxes 3                                                                                                      | -4.06 | 0.47 | 0.00 |
| A_51_P211964 | NM_025304 | Lcmt1      | 30949  | leucine carboxyl methyltransferase 1<br>solute carrier family 17 (sodium-dependent inorganic<br>phosphate cotransporter), member 8 | -5.16 | 0.47 | 0.00 |
| A_51_P210350 | NM_182959 | Slc17a8    | 216227 | phosphate cotransporter), member 8                                                                                                 | -3.83 | 0.47 | 0.00 |
| A_51_P158418 | AK013449  | 2810488G0  | 72842  | RIKEN cDNA 2810488G03 gene                                                                                                         | -5.30 | 0.47 | 0.00 |

|              |           |           |        |                                                                                                    |       |      |      |
|--------------|-----------|-----------|--------|----------------------------------------------------------------------------------------------------|-------|------|------|
| A_51_P135394 | NM_019758 | Mtch2     | 56428  | mitochondrial carrier homolog 2 (C. elegans)                                                       | -5.24 | 0.47 | 0.00 |
| A_52_P344970 | NM_145853 | Tpcn1     | 252972 | two pore channel 1                                                                                 | -6.03 | 0.47 | 0.00 |
| A_52_P88818  | NM_029556 | Clybl     | 69634  | citrate lyase beta like                                                                            | -3.84 | 0.47 | 0.00 |
| A_52_P667477 | NM_148925 | Fyco1     | 17281  | FYVE and coiled-coil domain containing 1                                                           | -2.74 | 0.47 | 0.05 |
| A_51_P317317 | NM_172116 | Pddc1     | 213350 | Parkinson disease 7 domain containing 1                                                            | -2.66 | 0.47 | 0.06 |
| A_52_P378084 | XR_002675 | NA        | NA     | NA                                                                                                 | -3.08 | 0.47 | 0.02 |
| A_51_P191520 | NM_019990 | Stard10   | 56018  | START domain containing 10                                                                         | -6.10 | 0.47 | 0.00 |
| A_51_P152550 | NM_178378 | lqcg      | 69707  | IQ motif containing G                                                                              | -3.56 | 0.47 | 0.01 |
| A_51_P352562 | NM_024177 | Mrpl38    | 60441  | mitochondrial ribosomal protein L38                                                                | -3.17 | 0.47 | 0.01 |
| A_51_P190572 | NM_133906 | Zkscan1   | 74570  | zinc finger with KRAB and SCAN domains 1                                                           | -3.12 | 0.47 | 0.01 |
| A_52_P655663 | NM_010376 | H13       | 14950  | histocompatibility 13                                                                              | -3.58 | 0.47 | 0.01 |
| A_51_P238932 | NA        | NA        | NA     | NA                                                                                                 | -2.94 | 0.47 | 0.02 |
| A_52_P336142 | NM_011920 | Abcg2     | 26357  | ATP-binding cassette, sub-family G (WHITE), member 2                                               | -3.00 | 0.47 | 0.02 |
| A_52_P193191 | NM_001001 | Slc35d2   | 70484  | solute carrier family 35, member D2                                                                | -4.91 | 0.47 | 0.00 |
| A_52_P358720 | NM_146489 | Olfr266   | 258482 | olfactory receptor 266                                                                             | -4.97 | 0.47 | 0.00 |
| A_51_P224517 | NM_172303 | Phf17     | 269424 | PHD finger protein 17                                                                              | -4.94 | 0.47 | 0.00 |
| A_51_P275658 | NM_016874 | Deaf1     | 54006  | (Drosophila)<br>deformed epidermal autoregulatory factor 1                                         | -6.42 | 0.47 | 0.00 |
| A_51_P217498 | NM_009204 | Slc2a4    | 20528  | solute carrier family 2 (facilitated glucose transporter),<br>member 4                             | -2.82 | 0.47 | 0.04 |
| A_51_P217395 | NM_145474 | Cyp2d34   | 223706 | cytochrome P450, family 2, subfamily d, polypeptide 34                                             | -3.59 | 0.47 | 0.01 |
| A_52_P309494 | NM_025905 | Ttc23     | 67009  | tetratricopeptide repeat domain 23                                                                 | -3.24 | 0.47 | 0.01 |
| A_52_P256929 | NM_008624 | Mras      | 17532  | muscle and microspikes RAS                                                                         | -4.91 | 0.47 | 0.00 |
| A_51_P484009 | NM_007941 | Stx2      | 13852  | syntaxin 2                                                                                         | -3.05 | 0.47 | 0.02 |
| A_52_P569348 | NM_010022 | Dbt       | 13171  | dihydrolipoamide branched chain transacylase E2<br>EGF-like module containing, mucin-like, hormone | -3.58 | 0.47 | 0.01 |
| A_51_P251768 | NM_010130 | Emr1      | 13733  | receptor-like sequence 1                                                                           | -3.03 | 0.47 | 0.02 |
| A_52_P381418 | NM_021435 | Slc35b4   | 58246  | solute carrier family 35, member B4                                                                | -3.62 | 0.47 | 0.00 |
| A_52_P532559 | AK158826  | Thrb      | 21834  | thyroid hormone receptor beta                                                                      | -3.48 | 0.47 | 0.01 |
| A_51_P264695 | NM_016669 | Crym      | 12971  | crystallin, mu                                                                                     | -4.29 | 0.47 | 0.00 |
| A_52_P70216  | AK156456  | Gm12942   | 1E+08  | predicted gene 12942                                                                               | -3.60 | 0.47 | 0.01 |
| A_51_P132718 | BU945741  | 2310010J1 | 78329  | RIKEN cDNA 2310010J17 gene                                                                         | -3.36 | 0.47 | 0.01 |

|              |           |            |        |                                                                                          |       |      |      |
|--------------|-----------|------------|--------|------------------------------------------------------------------------------------------|-------|------|------|
| A_51_P302453 | NM_172589 | Lhfp12     | 218454 | lipoma HMGIC fusion partner-like 2                                                       | -4.95 | 0.47 | 0.00 |
| A_52_P260629 | NM_027769 | Cpne3      | 70568  | copine III                                                                               | -4.58 | 0.47 | 0.00 |
| A_51_P416647 | NM_010115 | Egfbp2     | 13647  | epidermal growth factor binding protein type B                                           | -3.40 | 0.47 | 0.01 |
| A_51_P346668 | NM_012057 | Irf5       | 27056  | interferon regulatory factor 5                                                           | -3.45 | 0.47 | 0.01 |
| A_51_P443618 | NM_026686 | 0610011F06 | 68347  | RIKEN cDNA 0610011F06 gene                                                               | -5.90 | 0.47 | 0.00 |
| A_51_P462102 | BC052391  | Gpr125     | 70693  | G protein-coupled receptor 125                                                           | -4.28 | 0.47 | 0.00 |
| A_51_P383737 | NM_145611 | Kank2      | 235041 | KN motif and ankyrin repeat domains 2<br>epidermal growth factor-containing fibulin-like | -3.95 | 0.47 | 0.00 |
| A_51_P337412 | NM_146015 | Efemp1     | 216616 | extracellular matrix protein 1                                                           | -3.14 | 0.47 | 0.01 |
| A_51_P414637 | NM_015734 | Col5a1     | 12831  | collagen, type V, alpha 1                                                                | -3.39 | 0.47 | 0.01 |
| A_51_P209372 | NM_025436 | Sc4mol     | 66234  | sterol-C4-methyl oxidase-like                                                            | -4.03 | 0.47 | 0.00 |
| A_52_P584293 | NM_181415 | Atrnl1     | 226255 | attractin like 1                                                                         | -4.14 | 0.47 | 0.00 |
| A_51_P330918 | NA        | NA         | NA     | NA                                                                                       | -4.11 | 0.47 | 0.00 |
| A_52_P232071 | NA        | NA         | NA     | NA                                                                                       | -4.82 | 0.47 | 0.00 |
| A_51_P320114 | NM_013535 | Grcc10     | 14790  | gene rich cluster, C10 gene                                                              | -4.04 | 0.47 | 0.00 |
| A_51_P172177 | NM_001039 | Tmco1      | 68944  | transmembrane and coiled-coil domains 1                                                  | -5.51 | 0.47 | 0.00 |
| A_51_P234421 | NM_009213 | Smpd2      | 20598  | sphingomyelin phosphodiesterase 2, neutral                                               | -2.96 | 0.47 | 0.02 |
| A_52_P397678 | NM_178916 | Rfesd      | 218341 | Rieske (Fe-S) domain containing                                                          | -4.33 | 0.47 | 0.00 |
| A_51_P231946 | NM_025503 | 1700029P1  | 66346  | RIKEN cDNA 1700029P11 gene                                                               | -3.53 | 0.47 | 0.01 |
| A_52_P676198 | NM_025912 | 2010011I2  | 67017  | RIKEN cDNA 2010011I20 gene                                                               | -4.15 | 0.47 | 0.00 |
| A_51_P208769 | NM_133719 | Metrn      | 70083  | meteorin, glial cell differentiation regulator                                           | -4.37 | 0.47 | 0.00 |
| A_52_P639223 | NM_009738 | Bche       | 12038  | butyrylcholinesterase                                                                    | -4.45 | 0.47 | 0.00 |
| A_51_P260658 | NM_172935 | Amdhd2     | 245847 | amidohydrolase domain containing 2                                                       | -4.90 | 0.47 | 0.00 |
| A_51_P129720 | NM_175244 | Hectd3     | 76608  | HECT domain containing 3                                                                 | -3.53 | 0.47 | 0.01 |
| A_51_P204504 | NM_013925 | Adat1      | 30947  | adenosine deaminase, tRNA-specific 1                                                     | -4.20 | 0.47 | 0.00 |
| A_52_P576208 | XM_988947 | A930018M   | 328399 | RIKEN cDNA A930018M24 gene                                                               | -6.91 | 0.47 | 0.00 |
| A_52_P588917 | XM_900750 | NA         | NA     | NA                                                                                       | -3.67 | 0.47 | 0.00 |
| A_52_P487040 | BC056642  | Rdh9       | 103142 | retinol dehydrogenase 9                                                                  | -3.42 | 0.47 | 0.01 |
| A_51_P132592 | NM_029998 | 6030458C1  | 77877  | RIKEN cDNA 6030458C11 gene                                                               | -2.74 | 0.47 | 0.05 |
| A_52_P650288 | NM_029963 | Mrps5      | 77721  | mitochondrial ribosomal protein S5                                                       | -4.95 | 0.47 | 0.00 |
| A_51_P304296 | NA        | NA         | NA     | NA                                                                                       | -3.72 | 0.46 | 0.00 |
| A_52_P268715 | AK020667  | Helz       | 78455  | helicase with zinc finger domain                                                         | -4.28 | 0.46 | 0.00 |
| A_51_P224872 | BC076568  | Syne2      | 319565 | synaptic nuclear envelope 2                                                              | -5.79 | 0.46 | 0.00 |
| A_51_P201237 | NM_001040 | Larp1b     | 214048 | La ribonucleoprotein domain family, member 1B                                            | -4.46 | 0.46 | 0.00 |

|              |           |           |        |                                                      |       |      |      |
|--------------|-----------|-----------|--------|------------------------------------------------------|-------|------|------|
| A_52_P319161 | NM_019641 | Stmn1     | 16765  | stathmin 1                                           | -4.55 | 0.46 | 0.00 |
| A_51_P172424 | NM_001013 | Krtap4-16 | 435285 | keratin associated protein 4-16                      | -2.81 | 0.46 | 0.04 |
| A_51_P516097 | AK147204  | Cyld      | 74256  | cyllindromatosis (turban tumor syndrome)             | -4.41 | 0.46 | 0.00 |
| A_52_P41953  | NM_030221 | Nadsyn1   | 78914  | NAD synthetase 1                                     | -3.25 | 0.46 | 0.01 |
| A_51_P199364 | NM_016903 | Esd       | 13885  | esterase D/formylglutathione hydrolase               | -6.08 | 0.46 | 0.00 |
| A_51_P461504 | NM_007908 | Eef2k     | 13631  | eukaryotic elongation factor-2 kinase                | -4.82 | 0.46 | 0.00 |
| A_51_P269554 | NM_010439 | Hmgb1     | 15289  | high mobility group box 1                            | -4.62 | 0.46 | 0.00 |
| A_51_P183803 | NM_009174 | Siah2     | 20439  | seven in absentia 2                                  | -3.17 | 0.46 | 0.01 |
|              |           |           |        | proline-serine-threonine phosphatase-interacting     |       |      |      |
| A_52_P369562 | NM_013831 | Pstpip2   | 19201  | protein 2                                            | -4.31 | 0.46 | 0.00 |
| A_51_P248044 | NM_008483 | Lamb2     | 16779  | laminin, beta 2                                      | -5.07 | 0.46 | 0.00 |
| A_51_P153289 | NM_026522 | Chid1     | 68038  | chitinase domain containing 1                        | -2.94 | 0.46 | 0.02 |
| A_51_P373441 | NM_026948 | Cuta      | 67675  | cutA divalent cation tolerance homolog (E. coli)     | -4.81 | 0.46 | 0.00 |
|              |           |           |        | complement component 1, q subcomponent, alpha        |       |      |      |
| A_51_P181451 | NM_007572 | C1qa      | 12259  | polypeptide                                          | -2.72 | 0.46 | 0.05 |
| A_52_P164161 | NM_020010 | Cyp51     | 13121  | cytochrome P450, family 51                           | -3.25 | 0.46 | 0.01 |
| A_51_P192523 | NM_022657 | Fgf23     | 64654  | fibroblast growth factor 23                          | -3.17 | 0.46 | 0.01 |
| A_52_P197627 | NM_009471 | Umps      | 22247  | uridine monophosphate synthetase                     | -3.81 | 0.46 | 0.00 |
| A_51_P322906 | NM_008010 | Fgfr3     | 14184  | fibroblast growth factor receptor 3                  | -7.72 | 0.46 | 0.00 |
| A_51_P367780 | NM_029981 | Adamtsl2  | 77794  | ADAMTS-like 2                                        | -3.66 | 0.46 | 0.00 |
| A_52_P470030 | NM_181404 | Kank1     | 107351 | KN motif and ankyrin repeat domains 1                | -3.59 | 0.46 | 0.01 |
| A_52_P640694 | AK122226  | Rims3     | 242662 | regulating synaptic membrane exocytosis 3            | -5.22 | 0.46 | 0.00 |
| A_52_P628369 | NM_173427 | Klhdc7a   | 242721 | kelch domain containing 7A                           | -4.50 | 0.46 | 0.00 |
|              |           |           |        |                                                      |       |      |      |
| A_52_P392591 | NM_027931 | Tars2     | 71807  | threonyl-tRNA synthetase 2, mitochondrial (putative) | -2.92 | 0.46 | 0.03 |
| A_52_P407918 | NM_133975 | Trip12    | 14897  | thyroid hormone receptor interactor 12               | -3.92 | 0.46 | 0.00 |
| A_51_P193379 | NM_001040 | Mtmr7     | 54384  | myotubularin related protein 7                       | -5.50 | 0.46 | 0.00 |
| A_51_P267080 | NM_138302 | Tymp      | 72962  | thymidine phosphorylase                              | -3.47 | 0.46 | 0.01 |
|              |           |           |        |                                                      |       |      |      |
| A_52_P658513 | NM_009057 | Rag1ap1   | 19729  | recombination activating gene 1 activating protein 1 | -5.38 | 0.46 | 0.00 |
|              |           |           |        | low density lipoprotein receptor-related protein     |       |      |      |
| A_52_P583973 | NM_013587 | Lrpap1    | 16976  | associated protein 1                                 | -7.52 | 0.46 | 0.00 |
| A_52_P20727  | NM_175340 | Nhlrc1    | 105193 | NHL repeat containing 1                              | -4.78 | 0.46 | 0.00 |
| A_52_P344376 | NM_013506 | Eif4a2    | 13682  | eukaryotic translation initiation factor 4A2         | -3.21 | 0.46 | 0.01 |

|              |           |                 |        |                                                           |       |      |      |
|--------------|-----------|-----------------|--------|-----------------------------------------------------------|-------|------|------|
| A_51_P488646 | NM_009755 | Bmp1            | 12153  | bone morphogenetic protein 1                              | -3.69 | 0.46 | 0.00 |
| A_51_P280200 | NM_009462 | Usp10           | 22224  | ubiquitin specific peptidase 10                           | -3.40 | 0.46 | 0.01 |
| A_52_P466928 | NM_025292 | Synj2bp         | 24071  | synaptojanin 2 binding protein                            | -3.71 | 0.46 | 0.00 |
| A_51_P231499 | NM_008813 | Enpp1           | 18605  | ectonucleotide pyrophosphatase/phosphodiesterase 1        | -3.54 | 0.46 | 0.01 |
| A_52_P98100  | AK161732  | Dcxr            | 67880  | dicarbonyl L-xylulose reductase                           | -5.12 | 0.46 | 0.00 |
| A_51_P448416 | AK151452  | Pusl1           | 433813 | pseudouridylate synthase-like 1                           | -4.73 | 0.46 | 0.00 |
| A_51_P390496 | NM_139308 | Stard7          | 99138  | START domain containing 7                                 | -3.33 | 0.46 | 0.01 |
| A_51_P122981 | AK006699  | 170004511:73350 |        | RIKEN cDNA 1700045111 gene                                | -4.39 | 0.46 | 0.00 |
| A_52_P674694 | NM_025999 | Rnf141          | 67150  | ring finger protein 141                                   | -3.92 | 0.46 | 0.00 |
| A_51_P416771 | NM_198024 | Ranbp3l         | 223332 | RAN binding protein 3-like                                | -4.95 | 0.46 | 0.00 |
| A_51_P274506 | NM_011573 | Tex264          | 21767  | testis expressed gene 264                                 | -6.76 | 0.46 | 0.00 |
| A_51_P308726 | NM_025516 | Ergic3          | 66366  | ERGIC and golgi 3                                         | -3.02 | 0.46 | 0.02 |
| A_52_P609868 | NM_178759 | Timd4           | 276891 | T-cell immunoglobulin and mucin domain containing 4       | -3.62 | 0.46 | 0.00 |
| A_51_P155482 | NM_011132 | Pole            | 18973  | polymerase (DNA directed), epsilon                        | -4.46 | 0.46 | 0.00 |
| A_51_P108659 | NM_011134 | Pon1            | 18979  | paraoxonase 1                                             | -4.19 | 0.46 | 0.00 |
| A_51_P464911 | NM_029619 | Msrb2           | 76467  | methionine sulfoxide reductase B2                         | -4.36 | 0.46 | 0.00 |
| A_51_P513720 | U19596    | Cdkn2c          | 12580  | cyclin-dependent kinase inhibitor 2C (p18, inhibits CDK4) | -4.03 | 0.46 | 0.00 |
| A_51_P337065 | AK160524  | 4930402E1       | 319518 | RIKEN cDNA 4930402E16 gene                                | -3.40 | 0.46 | 0.01 |
| A_51_P199187 | NM_026062 | Fam69a          | 67266  | family with sequence similarity 69, member A              | -4.52 | 0.46 | 0.00 |
| A_51_P190869 | BB307119  | NA              | NA     | NA                                                        | -4.13 | 0.46 | 0.00 |
| A_51_P291062 | NM_028266 | Col16a1         | 107581 | collagen, type XVI, alpha 1                               | -3.44 | 0.46 | 0.01 |
| A_51_P331424 | NM_175138 | Dnaic1          | 68922  | dynein, axonemal, intermediate chain 1                    | -3.18 | 0.46 | 0.01 |
| A_52_P588262 | NA        | NA              | NA     | NA                                                        | -4.11 | 0.46 | 0.00 |
| A_52_P113465 | AK173007  | Kif1c           | 16562  | kinesin family member 1C                                  | -4.46 | 0.46 | 0.00 |
| A_51_P196605 | NM_026880 | Pink1           | 68943  | PTEN induced putative kinase 1                            | -4.13 | 0.46 | 0.00 |
| A_51_P183205 | NM_172615 | 1700021K1       | 224118 | RIKEN cDNA 1700021K19 gene                                | -3.07 | 0.46 | 0.02 |
| A_51_P462249 | NM_025415 | Cks2            | 66197  | CDC28 protein kinase regulatory subunit 2                 | -2.85 | 0.46 | 0.03 |
| A_52_P180842 | NM_177333 | Exoc3           | 211446 | exocyst complex component 3                               | -4.04 | 0.46 | 0.00 |
| A_51_P128491 | NM_015749 | Tcn2            | 21452  | transcobalamin 2                                          | -4.43 | 0.46 | 0.00 |
| A_51_P328817 | NM_183152 | Plk5            | 216166 | polo-like kinase 5 (Drosophila)                           | -4.07 | 0.46 | 0.00 |
| A_51_P329291 | NM_030206 | Cygb            | 114886 | cytoglobin                                                | -3.58 | 0.46 | 0.01 |

|              |           |           |        |                                                                                                   |       |      |      |
|--------------|-----------|-----------|--------|---------------------------------------------------------------------------------------------------|-------|------|------|
|              |           |           |        | pancreatic progenitor cell differentiation and proliferation factor homolog (zebrafish)RIKEN cDNA |       |      |      |
| A_51_P299266 | NM_025598 | Pdpf      | 66496  | 2700038C09 gene                                                                                   | -3.39 | 0.46 | 0.01 |
| A_52_P198019 | AK134650  | Fuz       | 70300  | fuzzy homolog (Drosophila)                                                                        | -4.53 | 0.46 | 0.00 |
| A_51_P330922 | NM_146101 | Habp2     | 226243 | hyaluronic acid binding protein 2                                                                 | -5.55 | 0.46 | 0.00 |
| A_51_P460332 | NM_007385 | Apoc4     | 11425  | apolipoprotein C-IV                                                                               | -3.35 | 0.46 | 0.01 |
| A_51_P323521 | NM_133924 | Snx21     | 101113 | sorting nexin family member 21                                                                    | -4.13 | 0.46 | 0.00 |
| A_52_P448266 | NM_009737 | Bcat2     | 12036  | branched chain aminotransferase 2, mitochondrial                                                  | -3.03 | 0.46 | 0.02 |
| A_51_P270741 | NM_009303 | Syng1     | 20972  | synaptogyrin 1                                                                                    | -5.55 | 0.46 | 0.00 |
| A_51_P437289 | NM_133214 | BC017612  | 170748 | cDNA sequence BC017612                                                                            | -3.03 | 0.46 | 0.02 |
| A_52_P3229   | NM_009924 | Cnr2      | 12802  | cannabinoid receptor 2 (macrophage)                                                               | -5.00 | 0.46 | 0.00 |
| A_52_P406371 | NM_001048 | Med14     | 26896  | mediator complex subunit 14                                                                       | -3.28 | 0.46 | 0.01 |
| A_51_P123745 | BC025823  | Spns2     | 216892 | spinster homolog 2 (Drosophila)                                                                   | -2.63 | 0.46 | 0.07 |
| A_51_P472630 | BC028539  | H2afv     | 77605  | H2A histone family, member V                                                                      | -3.88 | 0.46 | 0.00 |
| A_51_P342835 | NM_027909 | C2cd2l    | 71764  | C2 calcium-dependent domain containing 2-like                                                     | -3.95 | 0.46 | 0.00 |
| A_51_P429472 | NM_024185 | Fam188a   | 66960  | family with sequence similarity 188, member A                                                     | -4.24 | 0.46 | 0.00 |
| A_52_P116204 | NM_001025 | Cadm1     | 54725  | cell adhesion molecule 1                                                                          | -7.63 | 0.46 | 0.00 |
| A_51_P484020 | NM_134158 | AF251705  | 140497 | cDNA sequence AF251705                                                                            | -3.19 | 0.46 | 0.01 |
| A_51_P394558 | XM_194371 | Dchs1     | 233651 | dachsous 1 (Drosophila)                                                                           | -5.21 | 0.46 | 0.00 |
| A_51_P361049 | NM_025370 | 1110018J1 | 66129  | RIKEN cDNA 1110018J18 gene                                                                        | -4.76 | 0.46 | 0.00 |
| A_51_P302823 | NM_019686 | Cib2      | 56506  | calcium and integrin binding family member 2                                                      | -2.95 | 0.46 | 0.02 |
| A_51_P451758 | BC020147  | Rab3il1   | 74760  | RAB3A interacting protein (rabin3)-like 1                                                         | -5.31 | 0.46 | 0.00 |
| A_52_P313789 | AF369981  | Ppm1a     | 19042  | protein phosphatase 1A, magnesium dependent, alpha isoform                                        | -3.82 | 0.46 | 0.00 |
| A_51_P118046 | NM_177382 | Cyp2r1    | 244209 | cytochrome P450, family 2, subfamily r, polypeptide 1                                             | -3.22 | 0.46 | 0.01 |
| A_51_P256957 | NM_146033 | Ankmy2    | 217473 | ankyrin repeat and MYND domain containing 2                                                       | -6.40 | 0.46 | 0.00 |
| A_51_P489488 | NM_001039 | Pde4dip   | 83679  | phosphodiesterase 4D interacting protein (myomegalin)                                             | -3.24 | 0.46 | 0.01 |
| A_51_P218179 | NM_008618 | Mdh1      | 17449  | malate dehydrogenase 1, NAD (soluble)                                                             | -4.22 | 0.46 | 0.00 |
| A_52_P309418 | BC056481  | NA        | NA     | NA                                                                                                | -5.03 | 0.46 | 0.00 |
| A_52_P601333 | AK078961  | 6230424C1 | 67786  | RIKEN cDNA 6230424C14 gene                                                                        | -6.71 | 0.46 | 0.00 |
| A_51_P440790 | NM_031843 | Dpp7      | 83768  | dipeptidylpeptidase 7                                                                             | -7.08 | 0.46 | 0.00 |



|               |                     |        |                                                                                                                                                         |       |      |      |
|---------------|---------------------|--------|---------------------------------------------------------------------------------------------------------------------------------------------------------|-------|------|------|
| A_52_P636752  | NM_020010 Cyp51     | 13121  | cytochrome P450, family 51                                                                                                                              | -4.31 | 0.46 | 0.00 |
| A_51_P377557  | NM_029794 Cpsf4l    | 52670  | cleavage and polyadenylation specific factor 4-like<br>ankyrin repeat and sterile alpha motif domain                                                    | -3.43 | 0.46 | 0.01 |
| A_51_P318618  | NM_028085 Anks4b    | 72074  | containing 4B                                                                                                                                           | -3.24 | 0.46 | 0.01 |
| A_51_P457492  | NM_025791 Tmem223   | 66836  | transmembrane protein 223                                                                                                                               | -4.67 | 0.46 | 0.00 |
| A_52_P1107346 | AK018397 2610002M06 | 67028  | RIKEN cDNA 2610002M06 gene                                                                                                                              | -4.66 | 0.46 | 0.00 |
| A_51_P101255  | NM_027896 Coasy     | 71743  | Coenzyme A synthase                                                                                                                                     | -3.26 | 0.46 | 0.01 |
| A_52_P147870  | NM_029963 Mrps5     | 77721  | mitochondrial ribosomal protein S5                                                                                                                      | -3.63 | 0.46 | 0.00 |
| A_52_P460703  | NM_138956 Rassf3    | 192678 | Ras association (RalGDS/AF-6) domain family member 3                                                                                                    | -4.77 | 0.45 | 0.00 |
| A_51_P286865  | BC064745 Wdr33      | 74320  | WD repeat domain 33                                                                                                                                     | -3.54 | 0.45 | 0.01 |
| A_51_P215794  | NM_013851 Abca8b    | 27404  | ATP-binding cassette, sub-family A (ABC1), member 8b                                                                                                    | -3.70 | 0.45 | 0.00 |
| A_51_P487547  | NM_025911 Ccdc91    | 67015  | coiled-coil domain containing 91                                                                                                                        | -3.38 | 0.45 | 0.01 |
| A_51_P309889  | AK169010 2310044H10 | 69683  | RIKEN cDNA 2310044H10 gene                                                                                                                              | -4.72 | 0.45 | 0.00 |
| A_52_P601021  | NM_026979 C1qtnf2   | 69183  | C1q and tumor necrosis factor related protein 2                                                                                                         | -6.99 | 0.45 | 0.00 |
| A_51_P317115  | NM_175450 Wdr18     | 216156 | WD repeat domain 18                                                                                                                                     | -4.45 | 0.45 | 0.00 |
| A_52_P594636  | NM_201410 Ugt1a6b   | 394435 | UDP glucuronosyltransferase 1 family, polypeptide A6B<br>sirtuin 3 (silent mating type information regulation 2,<br>homolog) 3 ( <i>S. cerevisiae</i> ) | -3.77 | 0.45 | 0.00 |
| A_51_P477179  | NM_022433 Sirt3     | 64384  |                                                                                                                                                         | -4.39 | 0.45 | 0.00 |
| A_52_P370225  | NM_027062 C8g       | 69379  | complement component 8, gamma polypeptide<br>MAM domain containing glycosylphosphatidylinositol<br>anchor 2                                             | -3.63 | 0.45 | 0.00 |
| A_52_P207001  | AK038962 Mdga2      | 320772 |                                                                                                                                                         | -3.93 | 0.45 | 0.00 |
| A_51_P433843  | NM_001033 Slc22a23  | 73102  | solute carrier family 22, member 23                                                                                                                     | -3.35 | 0.45 | 0.01 |
| A_52_P222593  | AK003199 1110001A16 | 68554  | RIKEN cDNA 1110001A16 gene                                                                                                                              | -3.90 | 0.45 | 0.00 |
| A_52_P48777   | NM_017478 Copg2     | 54160  | coatamer protein complex, subunit gamma 2                                                                                                               | -5.84 | 0.45 | 0.00 |
| A_52_P46665   | AK077379 Dnajc19    | 67713  | Dnaj (Hsp40) homolog, subfamily C, member 19<br>nudix (nucleoside diphosphate linked moiety X)-type<br>motif 7                                          | -3.24 | 0.45 | 0.01 |
| A_51_P148670  | NM_024437 Nudt7     | 67528  |                                                                                                                                                         | -2.66 | 0.45 | 0.06 |
| A_51_P249848  | NM_007883 Dsg2      | 13511  | desmoglein 2                                                                                                                                            | -4.93 | 0.45 | 0.00 |
| A_51_P470311  | NM_028634 Cby1      | 73739  | chibby homolog 1 ( <i>Drosophila</i> )                                                                                                                  | -4.21 | 0.45 | 0.00 |
| A_51_P259186  | NM_145692 Lrrc67    | 69312  | leucine rich repeat containing 67                                                                                                                       | -3.33 | 0.45 | 0.01 |

|              |           |          |        |                                                                         |       |      |      |
|--------------|-----------|----------|--------|-------------------------------------------------------------------------|-------|------|------|
| A_52_P661029 | NM_177392 | Tmem220  | 338369 | transmembrane protein 220                                               | -5.49 | 0.45 | 0.00 |
| A_52_P671769 | NM_176837 | Arhgap18 | 73910  | Rho GTPase activating protein 18                                        | -5.05 | 0.45 | 0.00 |
| A_51_P103929 | NM_008591 | Met      | 17295  | met proto-oncogene                                                      | -2.68 | 0.45 | 0.05 |
| A_52_P467930 | NA        | NA       | NA     | NA                                                                      | -5.49 | 0.45 | 0.00 |
| A_51_P127464 | NM_199149 | Lrrc68   | 232947 | leucine rich repeat containing 68                                       | -6.96 | 0.45 | 0.00 |
| A_52_P224104 | NM_009790 | Calm1    | 12313  | calmodulin 1                                                            | -2.95 | 0.45 | 0.02 |
| A_51_P408162 | NM_175277 | Bola3    | 78653  | bolA-like 3 (E. coli)                                                   | -4.56 | 0.45 | 0.00 |
| A_52_P496163 | AK082993  | Zfp697   | 242109 | zinc finger protein 697                                                 | -4.88 | 0.45 | 0.00 |
| A_51_P146701 | AK156993  | Nsdhl    | 18194  | NAD(P) dependent steroid dehydrogenase-like                             | -4.32 | 0.45 | 0.00 |
| A_51_P239286 | NM_029410 | Bcl2l12  | 75736  | BCL2-like 12 (proline rich)                                             | -3.47 | 0.45 | 0.01 |
| A_52_P178866 | BC094349  | Lrp3     | 435965 | low density lipoprotein receptor-related protein 3                      | -3.99 | 0.45 | 0.00 |
| A_52_P193429 | NM_007496 | Zfhx3    | 11906  | zinc finger homeobox 3                                                  | -4.74 | 0.45 | 0.00 |
| A_52_P633612 | NM_001013 | Pard3    | 93742  | par-3 (partitioning defective 3) homolog (C. elegans)                   | -4.58 | 0.45 | 0.00 |
| A_51_P218895 | NM_008064 | Gaa      | 14387  | glucosidase, alpha, acid                                                | -4.44 | 0.45 | 0.00 |
| A_51_P349888 | NM_007449 | Ang2     | 11731  | angiogenin, ribonuclease A family, member 2                             | -2.76 | 0.45 | 0.05 |
| A_51_P231920 | NM_001013 | Lman2l   | 214895 | lectin, mannose-binding 2-like                                          | -4.73 | 0.45 | 0.00 |
| A_52_P272945 | NM_023243 | Ccnh     | 66671  | cyclin H                                                                | -4.53 | 0.45 | 0.00 |
| A_52_P203741 | NM_009176 | St3gal3  | 20441  | ST3 beta-galactoside alpha-2,3-sialyltransferase 3                      | -5.85 | 0.45 | 0.00 |
| A_51_P155196 | NM_178890 | Abtb2    | 99382  | ankyrin repeat and BTB (POZ) domain containing 2                        | -4.02 | 0.45 | 0.00 |
| A_51_P519696 | NM_008624 | Mras     | 17532  | muscle and microspikes RAS                                              | -4.42 | 0.45 | 0.00 |
| A_51_P345896 | NM_133880 | Pafah2   | 100163 | platelet-activating factor acetylhydrolase 2                            | -2.69 | 0.45 | 0.05 |
| A_51_P423456 | NM_019972 | Sort1    | 20661  | sortilin 1                                                              | -5.56 | 0.45 | 0.00 |
| A_51_P425962 | NM_010158 | Khdrbs3  | 13992  | KH domain containing, RNA binding, signal transduction associated 3     | -3.69 | 0.45 | 0.00 |
| A_52_P44765  | NM_144880 | Ppp2r5a  | 226849 | protein phosphatase 2, regulatory subunit B (B56), alpha isoform        | -4.10 | 0.45 | 0.00 |
| A_51_P386899 | NM_145447 | Mfsd7c   | 217721 | major facilitator superfamily domain containing 7C                      | -3.86 | 0.45 | 0.00 |
| A_52_P327146 | AK031552  | NA       | NA     | NA                                                                      | -2.63 | 0.45 | 0.07 |
| A_51_P392861 | NM_029365 | Med25    | 75613  | mediator of RNA polymerase II transcription, subunit 25 homolog (yeast) | -5.21 | 0.45 | 0.00 |

|              |           |            |        |                                                                       |       |      |      |
|--------------|-----------|------------|--------|-----------------------------------------------------------------------|-------|------|------|
| A_51_P477418 | AK003826  | Nfic       | 18029  | nuclear factor I/C                                                    | -3.40 | 0.45 | 0.01 |
| A_52_P170509 | NM_011075 | Abcb1b     | 18669  | ATP-binding cassette, sub-family B (MDR/TAP), member 1B               | -2.69 | 0.45 | 0.05 |
| A_51_P358171 | NM_019488 | Slc2a8     | 56017  | solute carrier family 2, (facilitated glucose transporter), member 8  | -6.82 | 0.45 | 0.00 |
| A_51_P174415 | NM_170755 | Fam134a    | 227298 | family with sequence similarity 134, member A                         | -6.04 | 0.45 | 0.00 |
| A_51_P509643 | NM_001042 | Snca       | 20617  | synuclein, alpha                                                      | -3.07 | 0.45 | 0.02 |
| A_52_P353322 | NM_133973 | Cog4       | 102339 | component of oligomeric golgi complex 4                               | -4.02 | 0.45 | 0.00 |
| A_52_P521054 | NM_011459 | Serpinb8   | 20725  | serine (or cysteine) peptidase inhibitor, clade B, member 8           | -2.86 | 0.45 | 0.03 |
| A_52_P884435 | AK079271  | Furin      | 18550  | furin (paired basic amino acid cleaving enzyme)                       | -4.88 | 0.45 | 0.00 |
| A_51_P502892 | NM_008688 | Nfic       | 18029  | nuclear factor I/C                                                    | -2.69 | 0.45 | 0.05 |
| A_51_P155323 | NM_010406 | Hc         | 15139  | hemolytic complement                                                  | -6.07 | 0.45 | 0.00 |
| A_52_P79385  | NM_025952 | Magt1      | 67075  | magnesium transporter 1                                               | -5.43 | 0.45 | 0.00 |
| A_51_P191519 | AB031550  | Stard10    | 56018  | START domain containing 10                                            | -5.86 | 0.45 | 0.00 |
| A_51_P350368 | NM_027986 | Cdadcl1    | 71891  | cytidine and dCMP deaminase domain containing 1                       | -3.75 | 0.45 | 0.00 |
| A_51_P400366 | NM_021375 | Rhbg       | 58176  | Rhesus blood group-associated B glycoprotein                          | -3.79 | 0.45 | 0.00 |
| A_51_P384113 | AK033963  | 9330129D05 | 338350 | RIKEN cDNA 9330129D05 gene                                            | -4.18 | 0.45 | 0.00 |
| A_52_P305539 | NM_201375 | Kng2       | 385643 | kininogen 2                                                           | -3.95 | 0.45 | 0.00 |
| A_51_P272728 | AK007181  | Tmem165    | 21982  | transmembrane protein 165                                             | -4.44 | 0.45 | 0.00 |
| A_52_P181060 | NM_022988 | Nif3l1     | 65102  | Ngg1 interacting factor 3-like 1 (S. pombe)                           | -3.59 | 0.45 | 0.01 |
| A_51_P354913 | NM_027402 | Fndc5      | 384061 | fibronectin type III domain containing 5                              | -4.90 | 0.45 | 0.00 |
| A_51_P419925 | BC058405  | E130112L2  | 268739 | RIKEN cDNA E130112L23 gene                                            | -5.43 | 0.45 | 0.00 |
| A_51_P101545 | NM_019447 | Hgfac      | 54426  | hepatocyte growth factor activator                                    | -4.94 | 0.45 | 0.00 |
| A_51_P436610 | XM_895387 | 2210408F2  | 73652  | RIKEN cDNA 2210408F21 gene                                            | -4.12 | 0.45 | 0.00 |
| A_51_P108252 | NM_029522 | Gpsm2      | 76123  | G-protein signalling modulator 2 (AGS3-like, C. elegans)              | -4.33 | 0.45 | 0.00 |
| A_52_P110088 | NM_023247 | Ndufaf3    | 66706  | NADH dehydrogenase (ubiquinone) 1 alpha subcomplex, assembly factor 3 | -4.07 | 0.45 | 0.00 |
| A_51_P386031 | NM_009119 | Sap18      | 20220  | Sin3-associated polypeptide 18                                        | -4.54 | 0.45 | 0.00 |
| A_51_P116651 | NM_019759 | Dpt        | 56429  | dermatopontin                                                         | -2.84 | 0.45 | 0.03 |
| A_51_P116496 | NM_198172 | NA         | NA     | NA                                                                    | -3.17 | 0.45 | 0.01 |
| A_52_P552879 | NM_001025 | Efcab4a    | 213573 | EF-hand calcium binding domain 4A                                     | -4.55 | 0.45 | 0.00 |

|               |           |           |        |                                                                              |       |      |      |
|---------------|-----------|-----------|--------|------------------------------------------------------------------------------|-------|------|------|
| A_51_P476689  | NM_001038 | Mapt      | 17762  | microtubule-associated protein tau                                           | -4.36 | 0.45 | 0.00 |
| A_51_P481221  | NM_019517 | Bace2     | 56175  | beta-site APP-cleaving enzyme 2                                              | -5.43 | 0.45 | 0.00 |
| A_52_P641282  | AK005692  | Pdilt     | 71830  | protein disulfide isomerase-like, testis expressed                           | -4.09 | 0.45 | 0.00 |
| A_52_P299684  | NM_172465 | Zdhhc9    | 208884 | zinc finger, DHHC domain containing 9                                        | -3.77 | 0.45 | 0.00 |
| A_52_P356245  | NM_198616 | Ccdc85b   | 240514 | coiled-coil domain containing 85B                                            | -4.49 | 0.45 | 0.00 |
| A_52_P77793   | NM_015818 | Hs6st1    | 50785  | heparan sulfate 6-O-sulfotransferase 1                                       | -4.02 | 0.45 | 0.00 |
| A_51_P117581  | NM_022021 | Cables1   | 63955  | CDK5 and Abl enzyme substrate 1                                              | -3.89 | 0.45 | 0.00 |
| A_51_P441942  | NM_009383 | Tial1     | 21843  | Tia1 cytotoxic granule-associated RNA binding protein-like 1                 | -2.71 | 0.45 | 0.05 |
| A_51_P117865  | NM_030565 | Fam20c    | 80752  | family with sequence similarity 20, member C                                 | -3.41 | 0.45 | 0.01 |
| A_51_P354077  | NM_153153 | Svil      | 225115 | supervillin                                                                  | -3.97 | 0.45 | 0.00 |
| A_52_P8227    | NM_008866 | Lypla1    | 18777  | lysophospholipase 1                                                          | -3.72 | 0.45 | 0.00 |
| A_52_P24843   | NM_008960 | Pten      | 19211  | phosphatase and tensin homolog                                               | -4.18 | 0.45 | 0.00 |
| A_51_P174773  | NM_026063 | 2900010M  | 67267  | RIKEN cDNA 2900010M23 gene                                                   | -5.38 | 0.45 | 0.00 |
| A_52_P312116  | AK078819  | Znrf1     | 170737 | zinc and ring finger 1                                                       | -2.87 | 0.45 | 0.03 |
| A_52_P412529  | NM_020593 | Fbxo3     | 57443  | F-box protein 3                                                              | -3.54 | 0.45 | 0.01 |
| A_51_P386911  | NM_027346 | Taco1     | 70207  | cytochrome c oxidase I                                                       | -4.35 | 0.45 | 0.00 |
| A_52_P327537  | NM_010820 | Mpdz      | 17475  | multiple PDZ domain protein                                                  | -3.31 | 0.45 | 0.01 |
| A_51_P150905  | NM_145479 | Klhl22    | 224023 | kelch-like 22 (Drosophila)                                                   | -4.13 | 0.45 | 0.00 |
| A_52_P620496  | AK031480  | Gpr182    | 11536  | G protein-coupled receptor 182                                               | -3.05 | 0.45 | 0.02 |
| A_52_P23379   | NM_144804 | Depdc7    | 211896 | DEP domain containing 7                                                      | -3.49 | 0.45 | 0.01 |
| A_51_P411200  | NM_027391 | lyd       | 70337  | iodotyrosine deiodinase                                                      | -4.58 | 0.45 | 0.00 |
| A_52_P572178  | AK122246  | D130043K2 | 210108 | RIKEN cDNA D130043K22 gene                                                   | -2.98 | 0.45 | 0.02 |
| A_52_P1197653 | CB590277  | Uvrag     | 78610  | UV radiation resistance associated gene                                      | -5.98 | 0.45 | 0.00 |
| A_51_P391485  | NM_008406 | Itih1     | 16424  | inter-alpha trypsin inhibitor, heavy chain 1                                 | -7.59 | 0.45 | 0.00 |
| A_52_P282905  | XM_901524 | NA        | NA     | NA                                                                           | -4.03 | 0.45 | 0.00 |
| A_52_P536494  | NM_008709 | Mycn      | 18109  | v-myc myelocytomatosis viral related oncogene, neuroblastoma derived (avian) | -2.89 | 0.45 | 0.03 |
| A_51_P486738  | NM_010247 | Xrcc6     | 14375  | X-ray repair complementing defective repair in Chinese hamster cells 6       | -4.13 | 0.44 | 0.00 |
| A_52_P163515  | XR_004420 | NA        | NA     | NA                                                                           | -3.48 | 0.44 | 0.01 |
| A_52_P531175  | NM_013902 | Fkbp3     | 30795  | FK506 binding protein 3                                                      | -3.80 | 0.44 | 0.00 |

|              |           |          |        |                                                                                             |       |      |      |
|--------------|-----------|----------|--------|---------------------------------------------------------------------------------------------|-------|------|------|
| A_51_P352264 | NM_153056 | Sirt7    | 209011 | sirtuin 7 (silent mating type information regulation 2, homolog) 7 ( <i>S. cerevisiae</i> ) | -7.39 | 0.44 | 0.00 |
| A_52_P629333 | NM_145608 | BC021891 | 234878 | cDNA sequence BC021891                                                                      | -4.42 | 0.44 | 0.00 |
| A_51_P447855 | BC027795  | Rnf160   | 78913  | ring finger protein 160                                                                     | -3.28 | 0.44 | 0.01 |
| A_51_P448464 | NM_010767 | Masp2    | 17175  | mannan-binding lectin serine peptidase 2                                                    | -6.01 | 0.44 | 0.00 |
| A_51_P521176 | NM_025886 | Rassf7   | 66985  | Ras association (RalGDS/AF-6) domain family (N-terminal) member 7                           | -4.88 | 0.44 | 0.00 |
| A_51_P501538 | NM_009624 | Adcy9    | 11515  | adenylate cyclase 9                                                                         | -3.07 | 0.44 | 0.02 |
| A_52_P287811 | AK051168  | Hpgd     | 15446  | hydroxyprostaglandin dehydrogenase 15 (NAD)                                                 | -3.95 | 0.44 | 0.00 |
| A_52_P425734 | NM_145146 | Afm      | 280662 | afamin                                                                                      | -4.27 | 0.44 | 0.00 |
| A_51_P415555 | NM_001042 | Amy2a5   | 109959 | amylase 2a5                                                                                 | -4.24 | 0.44 | 0.00 |
| A_51_P498257 | NM_025999 | Rnf141   | 67150  | ring finger protein 141                                                                     | -5.12 | 0.44 | 0.00 |
| A_51_P513719 | NM_007671 | Cdkn2c   | 12580  | cyclin-dependent kinase inhibitor 2C (p18, inhibits CDK4)                                   | -4.36 | 0.44 | 0.00 |
| A_52_P534203 | AK032463  | Pias2    | 17344  | protein inhibitor of activated STAT 2                                                       | -5.24 | 0.44 | 0.00 |
| A_52_P241676 | NM_023449 | Slc9a3r2 | 65962  | solute carrier family 9 (sodium/hydrogen exchanger), member 3 regulator 2                   | -3.16 | 0.44 | 0.01 |
| A_51_P292736 | NM_007654 | Cd72     | 12517  | CD72 antigen                                                                                | -5.47 | 0.44 | 0.00 |
| A_51_P508289 | NM_010145 | Ephx1    | 13849  | epoxide hydrolase 1, microsomal                                                             | -2.79 | 0.44 | 0.04 |
| A_51_P192955 | BG921888  | NA       | NA     | NA                                                                                          | -3.72 | 0.44 | 0.00 |
| A_51_P291247 | NM_008646 | Cpamd8   | 17837  | C3 and PZP-like, alpha-2-macroglobulin domain containing 8                                  | -2.62 | 0.44 | 0.07 |
| A_51_P513153 | NM_008890 | Pnmt     | 18948  | phenylethanolamine-N-methyltransferase                                                      | -4.34 | 0.44 | 0.00 |
| A_51_P133953 | AV030849  | NA       | NA     | NA                                                                                          | -7.52 | 0.44 | 0.00 |
| A_51_P313635 | NM_134420 | Slc26a6  | 171429 | solute carrier family 26, member 6                                                          | -3.67 | 0.44 | 0.00 |
| A_51_P106527 | NM_026633 | Fam195a  | 68241  | family with sequence similarity 195, member A                                               | -2.86 | 0.44 | 0.03 |
| A_52_P348038 | NM_016663 | Syt3     | 20981  | synaptotagmin III                                                                           | -6.82 | 0.44 | 0.00 |
| A_51_P374457 | NM_013541 | Gstp1    | 14870  | glutathione S-transferase, pi 1                                                             | -6.63 | 0.44 | 0.00 |
| A_51_P195244 | NM_029568 | Mfap4    | 76293  | microfibrillar-associated protein 4                                                         | -3.86 | 0.44 | 0.00 |
| A_51_P499864 | NM_134024 | Tubg1    | 103733 | tubulin, gamma 1                                                                            | -2.71 | 0.44 | 0.05 |
| A_51_P253320 | NM_134257 | Rgs3     | 50780  | regulator of G-protein signaling 3                                                          | -3.38 | 0.44 | 0.01 |
| A_51_P183261 | NM_007474 | Aqp8     | 11833  | aquaporin 8                                                                                 | -2.61 | 0.44 | 0.07 |
| A_52_P14600  | AK144191  | Cd72     | 12517  | CD72 antigen                                                                                | -5.41 | 0.44 | 0.00 |
| A_51_P314273 | X14206    | Parp1    | 11545  | poly (ADP-ribose) polymerase family, member 1                                               | -3.30 | 0.44 | 0.01 |

|              |           |          |        |                                                                                                        |       |      |      |
|--------------|-----------|----------|--------|--------------------------------------------------------------------------------------------------------|-------|------|------|
| A_51_P370341 | NM_133879 | Zbtb48   | 100090 | zinc finger and BTB domain containing 48                                                               | -4.09 | 0.44 | 0.00 |
| A_51_P167754 | NM_011492 | Stk11    | 20869  | serine/threonine kinase 11                                                                             | -6.08 | 0.44 | 0.00 |
| A_51_P454196 | AK008803  | Sh2d4a   | 72281  | SH2 domain containing 4A                                                                               | -5.83 | 0.44 | 0.00 |
| A_52_P417694 | NM_027078 | Ikbip    | 67454  | IKBKB interacting protein<br>solute carrier family 16 (monocarboxylic acid<br>transporters), member 10 | -3.87 | 0.44 | 0.00 |
| A_51_P448618 | AK165240  | Slc16a10 | 72472  | transporters), member 10                                                                               | -3.40 | 0.44 | 0.01 |
| A_51_P294994 | NM_001008 | Mxi1     | 17859  | Max interacting protein 1                                                                              | -4.77 | 0.44 | 0.00 |
| A_51_P398235 | BC079852  | Dnajc11  | 230935 | DnaJ (Hsp40) homolog, subfamily C, member 11                                                           | -2.76 | 0.44 | 0.05 |
| A_52_P78023  | NM_172397 | Limd2    | 67803  | LIM domain containing 2                                                                                | -7.04 | 0.44 | 0.00 |
| A_52_P273169 | XM_994427 | NA       | NA     | NA                                                                                                     | -3.07 | 0.44 | 0.02 |
| A_51_P160344 | AK014046  | Cenpv    | 73139  | centromere protein V                                                                                   | -5.67 | 0.44 | 0.00 |
| A_52_P611213 | BC005604  | Dnajc28  | 246738 | DnaJ (Hsp40) homolog, subfamily C, member 28                                                           | -3.98 | 0.44 | 0.00 |
| A_52_P338479 | AK039015  | Unc13b   | 22249  | unc-13 homolog B (C. elegans)                                                                          | -5.42 | 0.44 | 0.00 |
| A_52_P482825 | NM_019405 | Cetn2    | 26370  | centrin 2                                                                                              | -4.26 | 0.44 | 0.00 |
| A_51_P478598 | NM_010906 | Nfix     | 18032  | nuclear factor I/X                                                                                     | -3.51 | 0.44 | 0.01 |
| A_51_P493522 | NM_178929 | Kazald1  | 107250 | Kazal-type serine peptidase inhibitor domain 1                                                         | -3.78 | 0.44 | 0.00 |
| A_52_P50478  | NM_032543 | Rnf123   | 84585  | ring finger protein 123                                                                                | -5.59 | 0.44 | 0.00 |
| A_51_P436068 | NM_007412 | Gpr182   | 11536  | G protein-coupled receptor 182                                                                         | -2.74 | 0.44 | 0.05 |
| A_52_P383526 | NA        | NA       | NA     | NA                                                                                                     | -3.34 | 0.44 | 0.01 |
| A_52_P464570 | NM_177327 | Wwp1     | 107568 | WW domain containing E3 ubiquitin protein ligase 1                                                     | -3.36 | 0.44 | 0.01 |
| A_51_P374752 | NM_011255 | Rbp4     | 19662  | retinol binding protein 4, plasma                                                                      | -5.96 | 0.44 | 0.00 |
| A_52_P438084 | NM_008860 | Prkcz    | 18762  | protein kinase C, zeta                                                                                 | -3.52 | 0.44 | 0.01 |
| A_52_P551154 | NA        | NA       | NA     | NA                                                                                                     | -3.57 | 0.44 | 0.01 |
| A_52_P340136 | X71478    | Cyp4a10  | 13117  | cytochrome P450, family 4, subfamily a, polypeptide 10                                                 | -3.15 | 0.44 | 0.01 |
| A_52_P636724 | AK078193  | Lamp2    | 16784  | lysosomal-associated membrane protein 2                                                                | -5.26 | 0.44 | 0.00 |
| A_51_P485946 | NM_010191 | Fdft1    | 14137  | farnesyl diphosphate farnesyl transferase 1                                                            | -3.91 | 0.44 | 0.00 |
| A_51_P103209 | NM_028639 | Ttc7     | 225049 | tetratricopeptide repeat domain 7<br>protein tyrosine phosphatase-like A domain containing<br>2        | -3.56 | 0.44 | 0.01 |
| A_51_P463120 | NM_025760 | Ptplad2  | 66775  | 2                                                                                                      | -5.71 | 0.44 | 0.00 |
| A_52_P202276 | AK122556  | BC057079 | 230393 | cDNA sequence BC057079<br>succinate dehydrogenase complex, subunit A,<br>flavoprotein (Fp)             | -3.48 | 0.44 | 0.01 |
| A_51_P410823 | NM_023281 | Sdha     | 66945  | flavoprotein (Fp)                                                                                      | -3.98 | 0.44 | 0.00 |

|              |           |           |        |                                                                                                       |       |      |      |
|--------------|-----------|-----------|--------|-------------------------------------------------------------------------------------------------------|-------|------|------|
| A_51_P282930 | NM_011281 | Rorc      | 19885  | RAR-related orphan receptor gamma                                                                     | -5.50 | 0.44 | 0.00 |
| A_52_P307142 | XM_895387 | 2210408F2 | 73652  | RIKEN cDNA 2210408F21 gene                                                                            | -4.12 | 0.44 | 0.00 |
| A_51_P481788 | NM_011949 | Mapk1     | 26413  | mitogen-activated protein kinase 1                                                                    | -4.63 | 0.44 | 0.00 |
| A_52_P129867 | NM_177244 | Fastkd1   | 320720 | FAST kinase domains 1                                                                                 | -3.45 | 0.44 | 0.01 |
| A_52_P431662 | NM_024434 | Lap3      | 66988  | leucine aminopeptidase 3                                                                              | -4.15 | 0.44 | 0.00 |
| A_51_P273979 | NM_007681 | Cenpa     | 12615  | centromere protein A                                                                                  | -4.24 | 0.44 | 0.00 |
| A_52_P229997 | NM_013926 | Cbx8      | 30951  | chromobox homolog 8 (Drosophila Pc class)<br>solute carrier family 39 (metal ion transporter), member | -3.97 | 0.44 | 0.00 |
| A_51_P334093 | NM_026228 | Slc39a8   | 67547  | 8                                                                                                     | -3.73 | 0.44 | 0.00 |
| A_51_P243122 | NM_001029 | Sec14l3   | 380683 | SEC14-like 3 (S. cerevisiae)                                                                          | -4.27 | 0.44 | 0.00 |
| A_51_P256842 | NM_029887 | Yif1b     | 77254  | Yip1 interacting factor homolog B (S. cerevisiae)                                                     | -6.80 | 0.44 | 0.00 |
| A_52_P392833 | NA        | NA        | NA     | NA                                                                                                    | -4.66 | 0.44 | 0.00 |
| A_52_P132165 | NM_053262 | Hsd17b11  | 114664 | hydroxysteroid (17-beta) dehydrogenase 11                                                             | -5.12 | 0.44 | 0.00 |
| A_51_P402393 | NM_178741 | Klhl8     | 246293 | kelch-like 8 (Drosophila)                                                                             | -6.93 | 0.44 | 0.00 |
| A_52_P663666 | AK085506  | 4933404O1 | 66752  | RIKEN cDNA 4933404O12 gene                                                                            | -4.07 | 0.44 | 0.00 |
| A_51_P495986 | NM_025508 | Gmpr      | 66355  | guanosine monophosphate reductase<br>NADH dehydrogenase (ubiquinone) 1 beta subcomplex,               | -3.75 | 0.44 | 0.00 |
| A_51_P201904 | NM_025316 | Ndufb5    | 66046  | 5                                                                                                     | -5.13 | 0.44 | 0.00 |
| A_51_P457446 | NM_019546 | Prodh2    | 56189  | proline dehydrogenase (oxidase) 2                                                                     | -4.30 | 0.44 | 0.00 |
| A_51_P168439 | AK004187  | Klhl24    | 75785  | kelch-like 24 (Drosophila)                                                                            | -2.76 | 0.44 | 0.05 |
| A_52_P494841 | NA        | NA        | NA     | NA                                                                                                    | -4.46 | 0.44 | 0.00 |
| A_52_P438682 | BC064745  | Wdr33     | 74320  | WD repeat domain 33<br>N(alpha)-acetyltransferase 10, NatA catalytic                                  | -7.19 | 0.44 | 0.00 |
| A_51_P195324 | NM_019870 | Naa10     | 56292  | subunit Nalpha acetyltransferase 10                                                                   | -4.82 | 0.44 | 0.00 |
| A_52_P54516  | NM_029752 | Bri3bp    | 76809  | Bri3 binding protein                                                                                  | -4.23 | 0.44 | 0.00 |
| A_52_P472319 | AK147513  | Plxnd1    | 67784  | plexin D1                                                                                             | -3.61 | 0.44 | 0.01 |
| A_51_P314186 | NM_001079 | Syne1     | 64009  | synaptic nuclear envelope 1                                                                           | -4.04 | 0.44 | 0.00 |
| A_51_P332602 | NM_013677 | Surf1     | 20930  | surfeit gene 1                                                                                        | -3.84 | 0.44 | 0.00 |
| A_51_P406429 | NM_172665 | Pdk1      | 228026 | pyruvate dehydrogenase kinase, isoenzyme 1                                                            | -2.62 | 0.44 | 0.07 |
| A_52_P496532 | NA        | NA        | NA     | NA                                                                                                    | -3.73 | 0.44 | 0.00 |
| A_51_P266763 | NM_007998 | Fech      | 14151  | ferrochelatase                                                                                        | -4.71 | 0.44 | 0.00 |
| A_51_P172692 | NM_017478 | Copg2     | 54160  | coatomer protein complex, subunit gamma 2<br>SHC (Src homology 2 domain containing) transforming      | -6.00 | 0.44 | 0.00 |
| A_52_P104108 | BC059866  | Shc2      | 216148 | protein 2                                                                                             | -3.30 | 0.44 | 0.01 |

|              |           |                 |        |                                                        |       |      |      |
|--------------|-----------|-----------------|--------|--------------------------------------------------------|-------|------|------|
|              |           |                 |        | peptidase domain containing associated with muscle     |       |      |      |
| A_51_P212592 | NM_173749 | Pamr1           | 210622 | regeneration 1                                         | -5.14 | 0.44 | 0.00 |
| A_52_P121192 | NM_145613 | C1qtnf5         | 235312 | C1q and tumor necrosis factor related protein 5        | -3.59 | 0.44 | 0.01 |
| A_51_P333099 | NM_025544 | Mrps15          | 66407  | mitochondrial ribosomal protein S15                    | -4.32 | 0.44 | 0.00 |
| A_51_P370315 | NM_011937 | Gnpda1          | 26384  | glucosamine-6-phosphate deaminase 1                    | -3.38 | 0.44 | 0.01 |
| A_52_P223508 | AK081581  | 6720401G1103012 |        | RIKEN cDNA 6720401G13 gene                             | -5.57 | 0.44 | 0.00 |
| A_52_P618501 | NM_144913 | Mepce           | 231803 | methylphosphate capping enzyme                         | -5.04 | 0.44 | 0.00 |
| A_52_P326808 | NM_026875 | Ypel3           | 66090  | yippee-like 3 (Drosophila)                             | -4.52 | 0.44 | 0.00 |
| A_51_P220162 | NM_008716 | Notch3          | 18131  | Notch gene homolog 3 (Drosophila)                      | -7.16 | 0.44 | 0.00 |
| A_52_P853177 | NM_011923 | Angptl2         | 26360  | angiopoietin-like 2                                    | -6.07 | 0.44 | 0.00 |
| A_52_P163820 | NM_028310 | 2810006K272650  |        | RIKEN cDNA 2810006K23 gene                             | -3.01 | 0.44 | 0.02 |
| A_51_P261428 | D86344    | Pdcd4           | 18569  | programmed cell death 4                                | -5.39 | 0.44 | 0.00 |
| A_51_P278427 | NM_146051 | 3830406C1218734 |        | RIKEN cDNA 3830406C13 gene                             | -3.48 | 0.44 | 0.01 |
| A_51_P246744 | NM_021435 | Slc35b4         | 58246  | solute carrier family 35, member B4                    | -3.90 | 0.44 | 0.00 |
| A_52_P300344 | AK128969  | Pm20d1          | 212933 | peptidase M20 domain containing 1                      | -3.21 | 0.44 | 0.01 |
| A_52_P34494  | NM_028835 | Atg7            | 74244  | autophagy-related 7 (yeast)                            | -6.15 | 0.43 | 0.00 |
| A_52_P45841  | NM_028976 | Gorasp1         | 74498  | golgi reassembly stacking protein 1                    | -3.83 | 0.43 | 0.00 |
| A_51_P410715 | NM_018805 | Hs3st3b1        | 54710  | heparan sulfate (glucosamine) 3-O-sulfotransferase 3B1 | -5.98 | 0.43 | 0.00 |
| A_51_P164987 | NM_001039 | Tmem120b        | 330189 | transmembrane protein 120B                             | -3.87 | 0.43 | 0.00 |
| A_51_P336622 | NM_021428 | Dexi            | 58239  | dexamethasone-induced transcript                       | -4.93 | 0.43 | 0.00 |
| A_51_P188271 | NM_054042 | Cd248           | 70445  | CD248 antigen, endosialin                              | -3.46 | 0.43 | 0.01 |
| A_51_P392214 | AK136802  | 1810048J1       | 67708  | RIKEN cDNA 1810048J11 gene                             | -4.14 | 0.43 | 0.00 |
| A_52_P637418 | AK147993  | Wdr25           | 212198 | WD repeat domain 25                                    | -4.43 | 0.43 | 0.00 |
| A_51_P428345 | NM_020007 | Mbnl1           | 56758  | muscleblind-like 1 (Drosophila)                        | -4.19 | 0.43 | 0.00 |
| A_52_P118161 | AK147680  | Lss             | 16987  | lanosterol synthase                                    | -3.71 | 0.43 | 0.00 |
| A_51_P126626 | NM_145459 | Zfp503          | 218820 | zinc finger protein 503                                | -4.67 | 0.43 | 0.00 |
| A_52_P572537 | NM_001005 | Mreg            | 381269 | melanoregulin                                          | -4.40 | 0.43 | 0.00 |
| A_51_P435858 | NA        | NA              | NA     | NA                                                     | -4.24 | 0.43 | 0.00 |
| A_52_P533402 | NM_001024 | Zfp607          | 545938 | zinc finger protein 607                                | -2.73 | 0.43 | 0.05 |
| A_51_P216496 | NM_009364 | Tfpi2           | 21789  | tissue factor pathway inhibitor 2                      | -3.30 | 0.43 | 0.01 |
| A_51_P257832 | NM_009479 | Uros            | 22276  | uroporphyrinogen III synthase                          | -3.48 | 0.43 | 0.01 |
| A_51_P441387 | NM_177645 | 1110028C1       | 68691  | RIKEN cDNA 1110028C15 gene                             | -4.51 | 0.43 | 0.00 |
| A_51_P483159 | NM_177157 | Gchfr           | 320415 | GTP cyclohydrolase I feedback regulator                | -7.26 | 0.43 | 0.00 |



|              |            |           |        |                                                                                                   |       |      |      |
|--------------|------------|-----------|--------|---------------------------------------------------------------------------------------------------|-------|------|------|
| A_51_P436254 | AK003775   | 1110018F1 | 68594  | RIKEN cDNA 1110018F16 gene                                                                        | -3.32 | 0.43 | 0.01 |
| A_52_P663602 | NM_015733  | Casp9     | 12371  | caspase 9                                                                                         | -5.61 | 0.43 | 0.00 |
| A_52_P485850 | XM_976153  | NA        | NA     | NA                                                                                                | -3.89 | 0.43 | 0.00 |
| A_51_P344301 | AK021019   | Svil      | 225115 | supervillin                                                                                       | -3.94 | 0.43 | 0.00 |
| A_52_P183598 | NM_001025! | BC026782  | 545366 | cDNA sequence BC026782<br>processing of precursor 5, ribonuclease P/MRP family<br>(S. cerevisiae) | -4.84 | 0.43 | 0.00 |
| A_51_P490204 | NM_026398  | Pop5      | 117109 | (S. cerevisiae)                                                                                   | -4.40 | 0.43 | 0.00 |
| A_51_P361328 | AK005483   | NA        | NA     | NA                                                                                                | -5.69 | 0.43 | 0.00 |
| A_51_P384936 | NM_027442  | Ddo       | 70503  | D-aspartate oxidase                                                                               | -2.86 | 0.43 | 0.03 |
| A_51_P394014 | NM_133686  | Qprt      | 67375  | quinolinate phosphoribosyltransferase                                                             | -4.15 | 0.43 | 0.00 |
| A_51_P120674 | NM_013508  | Elk3      | 13713  | ELK3, member of ETS oncogene family                                                               | -3.34 | 0.43 | 0.01 |
| A_51_P324097 | NM_207682  | Kif1b     | 16561  | kinesin family member 1B                                                                          | -4.33 | 0.43 | 0.00 |
| A_51_P177659 | NM_026622  | 3110057O1 | 269423 | RIKEN cDNA 3110057O12 gene                                                                        | -3.42 | 0.43 | 0.01 |
| A_51_P299709 | AK017111   | 4933438K2 | 71270  | RIKEN cDNA 4933438K21 gene                                                                        | -5.42 | 0.43 | 0.00 |
| A_51_P242166 | NM_024434  | Lap3      | 66988  | leucine aminopeptidase 3                                                                          | -4.07 | 0.43 | 0.00 |
| A_51_P184796 | NM_009542  | Zfp101    | 22643  | zinc finger protein 101                                                                           | -3.33 | 0.43 | 0.01 |
| A_52_P662001 | NM_025292  | Synj2bp   | 24071  | synaptojanin 2 binding protein                                                                    | -5.19 | 0.43 | 0.00 |
| A_52_P221887 | NM_175099  | Repin1    | 58887  | replication initiator 1                                                                           | -5.35 | 0.43 | 0.00 |
| A_51_P459944 | NM_011545  | Tcf21     | 21412  | transcription factor 21                                                                           | -4.16 | 0.43 | 0.00 |
| A_51_P148314 | NM_172543  | Fam117a   | 215512 | family with sequence similarity 117, memberA                                                      | -3.58 | 0.43 | 0.01 |
| A_52_P326548 | NM_175276  | Fhod3     | 225288 | formin homology 2 domain containing 3                                                             | -3.62 | 0.43 | 0.00 |
| A_51_P191087 | U33198     | Cep250    | 16328  | centrosomal protein 250                                                                           | -5.51 | 0.43 | 0.00 |
| A_51_P470432 | NM_019417  | Pdlim4    | 30794  | PDZ and LIM domain 4                                                                              | -5.21 | 0.43 | 0.00 |
| A_51_P218137 | AK008925   | Mettl7a1  | 70152  | methyltransferase like 7A1                                                                        | -5.53 | 0.43 | 0.00 |
| A_51_P124126 | NM_019823  | Cyp2d22   | 56448  | cytochrome P450, family 2, subfamily d, polypeptide 22                                            | -3.59 | 0.43 | 0.01 |
| A_52_P576049 | NM_010565  | Inhbc     | 16325  | inhibin beta-C                                                                                    | -3.49 | 0.43 | 0.01 |
| A_52_P618417 | NA         | NA        | NA     | NA                                                                                                | -3.58 | 0.43 | 0.01 |
| A_52_P118495 | AK035049   | Kdsr      | 70750  | 3-ketodihydrosphingosine reductase                                                                | -5.20 | 0.43 | 0.00 |
| A_52_P305307 | NM_011894  | Sh3bp5    | 24056  | SH3-domain binding protein 5 (BTK-associated)                                                     | -4.49 | 0.43 | 0.00 |
| A_51_P327796 | NM_010580  | Itgb5     | 16419  | integrin beta 5                                                                                   | -4.18 | 0.43 | 0.00 |
| A_51_P275395 | NM_133734  | Dcaf11    | 28199  | DDB1 and CUL4 associated factor 11                                                                | -3.40 | 0.43 | 0.01 |
| A_51_P335419 | NM_027945  | Csl       | 71832  | citrate synthase like                                                                             | -8.85 | 0.43 | 0.00 |
| A_52_P160209 | NM_139302  | Sh3glb2   | 227700 | SH3-domain GRB2-like endophilin B2                                                                | -5.05 | 0.43 | 0.00 |

|              |           |           |        |                                                                              |       |      |      |
|--------------|-----------|-----------|--------|------------------------------------------------------------------------------|-------|------|------|
| A_51_P266861 | NM_008615 | Me1       | 17436  | malic enzyme 1, NADP(+)-dependent, cytosolic                                 | -3.37 | 0.43 | 0.01 |
| A_51_P513992 | NM_139151 | Spag4     | 245865 | sperm associated antigen 4                                                   | -6.41 | 0.43 | 0.00 |
| A_51_P290986 | NM_007856 | Dhcr7     | 13360  | 7-dehydrocholesterol reductase                                               | -4.10 | 0.43 | 0.00 |
| A_51_P245414 | NM_010639 | Klk1      | 16612  | kallikrein 1                                                                 | -5.32 | 0.43 | 0.00 |
| A_51_P279064 | NM_198167 | Tmem63b   | 224807 | transmembrane protein 63b                                                    | -5.72 | 0.43 | 0.00 |
| A_52_P179068 | NM_017469 | Gucy1b3   | 54195  | guanylate cyclase 1, soluble, beta 3                                         | -4.03 | 0.43 | 0.00 |
| A_51_P308029 | NM_027251 | 2010107G2 | 69894  | RIKEN cDNA 2010107G23 gene                                                   | -3.84 | 0.43 | 0.00 |
| A_51_P177762 | NM_153133 | Rdh9      | 103142 | retinol dehydrogenase 9                                                      | -3.65 | 0.43 | 0.00 |
| A_51_P411316 | NM_011477 | Sprp2k    | 20765  | small proline-rich protein 2K                                                | -3.80 | 0.43 | 0.00 |
| A_52_P661044 | NM_009914 | Ccr3      | 12771  | chemokine (C-C motif) receptor 3                                             | -4.75 | 0.43 | 0.00 |
| A_52_P273098 | NM_018861 | Slc1a4    | 55963  | solute carrier family 1 (glutamate/neutral amino acid transporter), member 4 | -4.07 | 0.43 | 0.00 |
| A_51_P158876 | NM_023203 | Dctpp1    | 66422  | dCTP pyrophosphatase 1                                                       | -5.28 | 0.43 | 0.00 |
| A_52_P671525 | NM_175446 | Zmat1     | 215693 | zinc finger, matrin type 1                                                   | -2.97 | 0.43 | 0.02 |
| A_51_P474709 | AK008216  | Ccdc109a  | 215999 | coiled-coil domain containing 109A                                           | -5.92 | 0.43 | 0.00 |
| A_52_P609778 | NM_011844 | Mgll      | 23945  | monoglyceride lipase                                                         | -2.64 | 0.43 | 0.07 |
| A_51_P341349 | NM_024433 | Mtap      | 66902  | methylthioadenosine phosphorylase                                            | -2.89 | 0.43 | 0.03 |
| A_51_P327564 | NM_009752 | Glb1      | 12091  | galactosidase, beta 1                                                        | -5.26 | 0.43 | 0.00 |
| A_52_P611000 | NM_016903 | Esd       | 13885  | esterase D/formylglutathione hydrolase                                       | -6.83 | 0.43 | 0.00 |
| A_51_P456699 | NM_146795 | Olf812    | 258791 | olfactory receptor 812                                                       | -3.68 | 0.43 | 0.00 |
| A_51_P440923 | AK009333  | 2310014D1 | 169633 | RIKEN cDNA 2310014D11 gene                                                   | -4.68 | 0.43 | 0.00 |
| A_52_P519943 | BC044804  | Fads6     | 328035 | fatty acid desaturase domain family, member 6                                | -3.72 | 0.43 | 0.00 |
| A_52_P680935 | NM_001048 | Ghr       | 14600  | growth hormone receptor                                                      | -5.96 | 0.43 | 0.00 |
| A_51_P183446 | NM_001039 | Ceacam1   | 26365  | carcinoembryonic antigen-related cell adhesion molecule 1                    | -3.19 | 0.43 | 0.01 |
| A_52_P395228 | NM_008710 | Nnt       | 18115  | nicotinamide nucleotide transhydrogenase                                     | -2.65 | 0.43 | 0.06 |
| A_51_P408410 | NM_008906 | Ctsa      | 19025  | cathepsin A                                                                  | -2.79 | 0.43 | 0.04 |
| A_51_P185660 | NM_011338 | Ccl9      | 20308  | chemokine (C-C motif) ligand 9                                               | -4.25 | 0.43 | 0.00 |
| A_51_P487818 | NM_017399 | Fabp1     | 14080  | fatty acid binding protein 1, liver                                          | -4.75 | 0.43 | 0.00 |
| A_51_P510722 | NM_029096 | 1110008J0 | 100764 | RIKEN cDNA 1110008J03 gene                                                   | -5.95 | 0.43 | 0.00 |
| A_51_P157033 | NM_178692 | C130074G1 | 226777 | RIKEN cDNA C130074G19 gene                                                   | -4.06 | 0.43 | 0.00 |
| A_51_P125648 | AK153937  | Vwce      | 71768  | von Willebrand factor C and EGF domains                                      | -2.86 | 0.43 | 0.03 |
| A_51_P153053 | NM_020561 | Smpd3a    | 57319  | sphingomyelin phosphodiesterase, acid-like 3A                                | -4.73 | 0.43 | 0.00 |
| A_51_P237585 | NM_172793 | Btnl9     | 237754 | butyrophilin-like 9                                                          | -6.85 | 0.43 | 0.00 |

|              |           |           |        |                                                                                             |       |      |      |
|--------------|-----------|-----------|--------|---------------------------------------------------------------------------------------------|-------|------|------|
| A_51_P130057 | NM_175523 | Ppm1k     | 243382 | protein phosphatase 1K (PP2C domain containing)<br>phospholysine phosphohistidine inorganic | -3.91 | 0.43 | 0.00 |
| A_51_P286946 | NM_029609 | Lhpp      | 76429  | pyrophosphate phosphatase                                                                   | -3.73 | 0.43 | 0.00 |
| A_51_P410892 | NM_026065 | D10Ertd32 | 67270  | DNA segment, Chr 10, ERATO Doi 322, expressed                                               | -5.92 | 0.43 | 0.00 |
| A_51_P256902 | NM_031884 | Abcg5     | 27409  | ATP-binding cassette, sub-family G (WHITE), member 5                                        | -4.07 | 0.43 | 0.00 |
| A_51_P338413 | NM_019992 | Stap1     | 56792  | signal transducing adaptor family member 1                                                  | -4.01 | 0.43 | 0.00 |
| A_51_P378932 | NM_025977 | Ccdc159   | 67119  | coiled-coil domain containing 159                                                           | -4.00 | 0.43 | 0.00 |
| A_52_P425860 | BC026481  | lqsec1    | 232227 | IQ motif and Sec7 domain 1                                                                  | -6.25 | 0.43 | 0.00 |
| A_51_P502993 | NM_027480 | Ankrd24   | 70615  | ankyrin repeat domain 24                                                                    | -3.04 | 0.43 | 0.02 |
| A_51_P193302 | NM_025305 | Mrps7     | 50529  | mitochondrial ribosomal protein S7                                                          | -2.71 | 0.42 | 0.05 |
| A_51_P108948 | NM_019715 | Kcmf1     | 74287  | potassium channel modulatory factor 1                                                       | -5.34 | 0.42 | 0.00 |
| A_52_P237899 | NM_029432 | 4930402H2 | 228602 | RIKEN cDNA 4930402H24 gene                                                                  | -3.34 | 0.42 | 0.01 |
| A_52_P175679 | NM_001007 | Gm13023   | 194227 | predicted gene 13023                                                                        | -5.35 | 0.42 | 0.00 |
| A_51_P334318 | NM_027363 | 2010110P0 | 70261  | RIKEN cDNA 2010110P09 gene                                                                  | -4.84 | 0.42 | 0.00 |
| A_51_P484551 | AF072757  | Slc27a2   | 26458  | solute carrier family 27 (fatty acid transporter), member 2                                 | -2.62 | 0.42 | 0.07 |
| A_52_P220163 | NA        | NA        | NA     | NA                                                                                          | -3.65 | 0.42 | 0.00 |
| A_52_P716154 | AV242843  | NA        | NA     | NA                                                                                          | -3.07 | 0.42 | 0.02 |
| A_52_P224323 | NM_001013 | Pard3     | 93742  | par-3 (partitioning defective 3) homolog (C. elegans)                                       | -4.96 | 0.42 | 0.00 |
| A_51_P374468 | NM_008220 | Hbb-b1    | 15129  | hemoglobin, beta adult major chain                                                          | -2.62 | 0.42 | 0.07 |
| A_51_P140350 | NM_030221 | Nadsyn1   | 78914  | NAD synthetase 1                                                                            | -3.65 | 0.42 | 0.00 |
| A_51_P349825 | NM_026411 | 1700021F0 | 67851  | RIKEN cDNA 1700021F05 gene                                                                  | -5.35 | 0.42 | 0.00 |
| A_52_P491842 | NM_023336 | Brd3      | 67382  | bromodomain containing 3                                                                    | -5.37 | 0.42 | 0.00 |
| A_52_P104782 | NM_025784 | Bcs1l     | 66821  | BCS1-like (yeast)                                                                           | -3.40 | 0.42 | 0.01 |
| A_51_P354461 | AK172999  | Tbc1d9b   | 76795  | TBC1 domain family, member 9B                                                               | -5.35 | 0.42 | 0.00 |
| A_52_P484838 | NM_011266 | Rfxank    | 19727  | regulatory factor X-associated ankyrin-containing protein                                   | -3.70 | 0.42 | 0.00 |
| A_52_P271200 | NM_029296 | 1700001C1 | 75462  | RIKEN cDNA 1700001C19 gene                                                                  | -5.75 | 0.42 | 0.00 |
| A_52_P38157  | NM_008866 | Lypla1    | 18777  | lysophospholipase 1                                                                         | -3.19 | 0.42 | 0.01 |
| A_52_P261846 | NM_009929 | Col18a1   | 12822  | collagen, type XVIII, alpha 1                                                               | -5.63 | 0.42 | 0.00 |
| A_51_P418935 | AK004524  | Neurl2    | 415115 | neuralized-like 2 (Drosophila)                                                              | -3.89 | 0.42 | 0.00 |

|              |           |         |        |                                                                                                                 |       |      |      |
|--------------|-----------|---------|--------|-----------------------------------------------------------------------------------------------------------------|-------|------|------|
| A_51_P386612 | NM_027153 | Pir     | 69656  | pirin                                                                                                           | -5.91 | 0.42 | 0.00 |
| A_52_P55651  | NM_175437 | Pion    | 212167 | pigeon homolog (Drosophila)<br>solute carrier organic anion transporter family, member                          | -2.64 | 0.42 | 0.06 |
| A_51_P315931 | AF323958  | Slco2a1 | 24059  | 2a1                                                                                                             | -9.26 | 0.42 | 0.00 |
| A_52_P355934 | NM_010863 | Myo1b   | 17912  | myosin IB                                                                                                       | -4.24 | 0.42 | 0.00 |
| A_51_P107265 | NM_019718 | Arl3    | 56350  | ADP-ribosylation factor-like 3                                                                                  | -4.74 | 0.42 | 0.00 |
| A_52_P593037 | NM_027976 | Acsl5   | 433256 | acyl-CoA synthetase long-chain family member 5                                                                  | -3.40 | 0.42 | 0.01 |
| A_52_P244132 | NM_025478 | Isoc1   | 66307  | isochorismatase domain containing 1                                                                             | -5.08 | 0.42 | 0.00 |
| A_52_P456561 | NM_007435 | Abcd1   | 11666  | ATP-binding cassette, sub-family D (ALD), member 1                                                              | -5.13 | 0.42 | 0.00 |
| A_51_P297336 | NM_134078 | Chmp7   | 105513 | CHMP family, member 7                                                                                           | -4.94 | 0.42 | 0.00 |
| A_51_P298843 | NM_028281 | Pcbd2   | 72562  | pterin 4 alpha carbinolamine dehydratase/dimerization<br>cofactor of hepatocyte nuclear factor 1 alpha (TCF1) 2 | -3.65 | 0.42 | 0.00 |
| A_52_P591153 | NM_178911 | Pld4    | 104759 | phospholipase D family, member 4                                                                                | -6.28 | 0.42 | 0.00 |
| A_51_P199993 | NM_021896 | Gucy1a3 | 60596  | guanylate cyclase 1, soluble, alpha 3                                                                           | -4.27 | 0.42 | 0.00 |
| A_51_P407977 | NM_146226 | Apeh    | 235606 | acylpeptide hydrolase                                                                                           | -5.18 | 0.42 | 0.00 |
| A_52_P157450 | NM_021304 | Abhd1   | 57742  | abhydrolase domain containing 1                                                                                 | -2.66 | 0.42 | 0.05 |
| A_52_P405090 | BC066818  | Polr3g  | 67486  | polymerase (RNA) III (DNA directed) polypeptide G                                                               | -3.15 | 0.42 | 0.01 |
| A_51_P269793 | AK033780  | NA      | NA     | NA                                                                                                              | -5.58 | 0.42 | 0.00 |
| A_51_P329322 | NM_025512 | Zfand1  | 66361  | zinc finger, AN1-type domain 1                                                                                  | -4.40 | 0.42 | 0.00 |
| A_52_P243516 | NM_201361 | Fam82a1 | 381110 | family with sequence similarity 82, member A1                                                                   | -4.37 | 0.42 | 0.00 |
| A_52_P665197 | NA        | NA      | NA     | NA                                                                                                              | -3.31 | 0.42 | 0.01 |
| A_51_P355906 | NM_021099 | Kit     | 16590  | kit oncogene                                                                                                    | -4.42 | 0.42 | 0.00 |
| A_52_P619911 | AK041604  | Dact2   | 240025 | dapper homolog 2, antagonist of beta-catenin (xenopus)                                                          | -3.21 | 0.42 | 0.01 |
| A_51_P386503 | NM_026185 | Abhd15  | 67477  | abhydrolase domain containing 15                                                                                | -3.14 | 0.42 | 0.01 |
| A_52_P123018 | NM_010498 | Ids     | 15931  | iduronate 2-sulfatase                                                                                           | -3.90 | 0.42 | 0.00 |
| A_51_P420547 | NM_172621 | Clic5   | 224796 | chloride intracellular channel 5                                                                                | -5.97 | 0.42 | 0.00 |
| A_52_P27496  | NM_198423 | Bahcc1  | 268515 | BAH domain and coiled-coil containing 1<br>PH domain and leucine rich repeat protein phosphatase                | -3.78 | 0.42 | 0.00 |
| A_51_P156158 | XM_129968 | Phlpp1  | 98432  | 1                                                                                                               | -3.28 | 0.42 | 0.01 |
| A_51_P220343 | NM_018865 | Wisp1   | 22402  | WNT1 inducible signaling pathway protein 1                                                                      | -4.27 | 0.42 | 0.00 |

|              |           |           |        |                                                       |       |      |      |
|--------------|-----------|-----------|--------|-------------------------------------------------------|-------|------|------|
|              |           |           |        | Bernardinelli-Seip congenital lipodystrophy 2 homolog |       |      |      |
| A_51_P196526 | NM_008144 | Bscl2     | 14705  | (human)                                               | -4.21 | 0.42 | 0.00 |
| A_52_P574306 | NM_023114 | Apoc3     | 11814  | apolipoprotein C-III                                  | -3.73 | 0.42 | 0.00 |
| A_52_P268764 | NM_001038 | Fn3k      | 63828  | fructosamine 3 kinase                                 | -6.71 | 0.42 | 0.00 |
| A_51_P227108 | NM_029752 | Bri3bp    | 76809  | Bri3 binding protein                                  | -4.14 | 0.42 | 0.00 |
| A_51_P497006 | NM_053188 | Srd5a2    | 94224  | steroid 5 alpha-reductase 2                           | -3.03 | 0.42 | 0.02 |
| A_51_P331328 | NM_026730 | Gpihbp1   | 68453  | GPI-anchored HDL-binding protein 1                    | -3.40 | 0.42 | 0.01 |
| A_52_P521042 | NM_153557 | BC029214  | 227622 | cDNA sequence BC029214                                | -5.43 | 0.42 | 0.00 |
| A_52_P101333 | NM_009119 | Sap18     | 20220  | Sin3-associated polypeptide 18                        | -5.34 | 0.42 | 0.00 |
| A_51_P423680 | NM_144829 | Aarsd1    | 69684  | alanyl-tRNA synthetase domain containing 1            | -3.11 | 0.42 | 0.01 |
| A_51_P357533 | NM_172614 | Tmem44    | 224090 | transmembrane protein 44                              | -4.90 | 0.42 | 0.00 |
| A_51_P466478 | NM_011213 | Ptprf     | 19268  | protein tyrosine phosphatase, receptor type, F        | -5.59 | 0.42 | 0.00 |
| A_51_P258409 | NM_010423 | Hey1      | 15213  | hairy/enhancer-of-split related with YRPW motif 1     | -5.28 | 0.42 | 0.00 |
| A_52_P374395 | NA        | NA        | NA     | NA                                                    | -3.30 | 0.42 | 0.01 |
| A_51_P430950 | NM_009041 | Rdx       | 19684  | radixin                                               | -2.90 | 0.42 | 0.03 |
|              |           |           |        | mitochondrial translation optimization 1 homolog (S.  |       |      |      |
| A_51_P173906 | NM_026658 | Mto1      | 68291  | cerevisiae)                                           | -3.95 | 0.42 | 0.00 |
| A_51_P162188 | NM_172600 | 6720456H2 | 218989 | RIKEN cDNA 6720456H20 gene                            | -3.10 | 0.42 | 0.02 |
| A_52_P605129 | NM_178239 | NA        | NA     | NA                                                    | -5.55 | 0.42 | 0.00 |
| A_52_P577084 | AK019597  | NA        | NA     | NA                                                    | -4.61 | 0.42 | 0.00 |
| A_51_P488039 | NM_011494 | Stk16     | 20872  | serine/threonine kinase 16                            | -3.20 | 0.42 | 0.01 |
| A_52_P15490  | NM_021496 | Pvrl3     | 58998  | poliovirus receptor-related 3                         | -4.39 | 0.42 | 0.00 |
| A_52_P384394 | NM_138313 | Bmf       | 171543 | BCL2 modifying factor                                 | -3.11 | 0.42 | 0.01 |
| A_51_P219721 | NM_025942 | Ola1      | 67059  | Obg-like ATPase 1                                     | -3.78 | 0.42 | 0.00 |
| A_52_P568257 | NM_019972 | Sort1     | 20661  | sortilin 1                                            | -4.10 | 0.42 | 0.00 |
| A_52_P346037 | NM_013777 | Akr1c12   | 622402 | aldo-keto reductase family 1, member C12              | -6.27 | 0.42 | 0.00 |
| A_52_P680941 | NM_001048 | Ghr       | 14600  | growth hormone receptor                               | -4.53 | 0.42 | 0.00 |
| A_51_P411264 | NM_172597 | Txndc16   | 70561  | thioredoxin domain containing 16                      | -4.45 | 0.42 | 0.00 |
| A_51_P107433 | NM_053162 | Mrpl34    | 94065  | mitochondrial ribosomal protein L34                   | -3.89 | 0.42 | 0.00 |
| A_52_P560797 | NM_025999 | Rnf141    | 67150  | ring finger protein 141                               | -4.88 | 0.42 | 0.00 |
| A_52_P134146 | NM_001076 | 1810012P1 | 66274  | RIKEN cDNA 1810012P15 gene                            | -4.18 | 0.42 | 0.00 |
| A_51_P174422 | NM_013761 | Srr       | 27364  | serine racemase                                       | -3.55 | 0.42 | 0.01 |
| A_52_P669996 | NM_029239 | Prkd3     | 75292  | protein kinase D3                                     | -3.56 | 0.42 | 0.01 |

|              |           |            |        |                                                                                                       |       |      |      |
|--------------|-----------|------------|--------|-------------------------------------------------------------------------------------------------------|-------|------|------|
| A_52_P32081  | NM_175357 | Crbn       | 58799  | cereblon<br>nicotinate phosphoribosyltransferase domain                                               | -5.33 | 0.42 | 0.00 |
| A_51_P414115 | NM_172607 | Naprt1     | 223646 | containing 1                                                                                          | -4.08 | 0.42 | 0.00 |
| A_51_P443339 | NM_133960 | Ces6       | 102022 | carboxylesterase 6                                                                                    | -4.14 | 0.42 | 0.00 |
| A_52_P485433 | NM_026246 | Mrpl49     | 18120  | mitochondrial ribosomal protein L49                                                                   | -4.66 | 0.42 | 0.00 |
| A_51_P391764 | NM_028763 | Cbx6       | 494448 | chromobox homolog 6                                                                                   | -3.83 | 0.42 | 0.00 |
| A_52_P547662 | NM_008772 | P2ry1      | 18441  | purinergic receptor P2Y, G-protein coupled 1                                                          | -4.31 | 0.42 | 0.00 |
| A_51_P427476 | NM_024263 | Mxra8      | 74761  | matrix-remodelling associated 8                                                                       | -4.46 | 0.42 | 0.00 |
| A_51_P389905 | NM_013881 | Ulk2       | 29869  | Unc-51 like kinase 2 (C. elegans)                                                                     | -4.02 | 0.42 | 0.00 |
| A_51_P159902 | XM_132325 | AU042671   | 269700 | expressed sequence AU042671                                                                           | -3.25 | 0.42 | 0.01 |
| A_51_P469160 | NM_021557 | Rdh11      | 17252  | retinol dehydrogenase 11                                                                              | -3.70 | 0.42 | 0.00 |
| A_51_P390260 | NM_026444 | Cs         | 12974  | citrate synthase                                                                                      | -8.36 | 0.41 | 0.00 |
| A_51_P171965 | NM_026503 | 1110058L1  | 68002  | RIKEN cDNA 1110058L19 gene<br>nudix (nucleoside diphosphate linked moiety X)-type<br>motif 13         | -4.46 | 0.41 | 0.00 |
| A_52_P13568  | NM_026341 | Nudt13     | 67725  | RIKEN cDNA 3110057O12 gene                                                                            | -9.05 | 0.41 | 0.00 |
| A_52_P500622 | NM_026622 | 3110057O12 | 269423 | ring finger protein 141                                                                               | -5.16 | 0.41 | 0.00 |
| A_51_P275845 | NM_025999 | Rnf141     | 67150  | lecithin-retinol acyltransferase (phosphatidylcholine-<br>retinol-O-acyltransferase)                  | -4.29 | 0.41 | 0.00 |
| A_51_P350033 | NM_023624 | Lrat       | 79235  | brain protein 44                                                                                      | -3.11 | 0.41 | 0.01 |
| A_51_P103975 | NM_027430 | Brp44      | 70456  |                                                                                                       | -8.04 | 0.41 | 0.00 |
| A_51_P267063 | NM_144845 | Ugt3a2     | 223337 | UDP glycosyltransferases 3 family, polypeptide A2                                                     | -2.79 | 0.41 | 0.04 |
| A_52_P551496 | NM_026756 | Nfic       | 18029  | nuclear factor I/C                                                                                    | -2.97 | 0.41 | 0.02 |
| A_51_P188108 | NM_008480 | Lama1      | 16772  | laminin, alpha 1                                                                                      | -5.75 | 0.41 | 0.00 |
| A_51_P476492 | XM_893473 | NA         | NA     | NA                                                                                                    | -3.19 | 0.41 | 0.01 |
| A_52_P453650 | NA        | NA         | NA     | NA                                                                                                    | -3.93 | 0.41 | 0.00 |
| A_51_P475995 | NM_178060 | Thra       | 21833  | thyroid hormone receptor alpha                                                                        | -4.33 | 0.41 | 0.00 |
| A_52_P55732  | NM_011883 | Rnf13      | 24017  | ring finger protein 13<br>EGF-like module containing, mucin-like, hormone<br>receptor-like sequence 4 | -4.27 | 0.41 | 0.00 |
| A_51_P286357 | NM_139138 | Emr4       | 52614  | acid phosphatase-like 2                                                                               | -4.88 | 0.41 | 0.00 |
| A_51_P124784 | NM_153420 | Acpl2      | 235534 | phytanoyl-CoA dioxygenase domain containing 1                                                         | -4.64 | 0.41 | 0.00 |
| A_51_P357606 | NM_172267 | Phyhd1     | 227696 | phytanoyl-CoA dioxygenase domain containing 1                                                         | -3.63 | 0.41 | 0.00 |
| A_51_P215922 | NM_009811 | Casp6      | 12368  | caspase 6                                                                                             | -3.65 | 0.41 | 0.00 |
| A_52_P382325 | NM_001039 | Ahnak      | 66395  | AHNAK nucleoprotein (desmoyokin)                                                                      | -2.84 | 0.41 | 0.03 |

|               |           |           |        |                                                                                             |       |      |      |
|---------------|-----------|-----------|--------|---------------------------------------------------------------------------------------------|-------|------|------|
| A_51_P300337  | NM_007792 | Csrp2     | 13008  | cysteine and glycine-rich protein 2                                                         | -4.47 | 0.41 | 0.00 |
| A_51_P237752  | NM_008986 | Ptrf      | 19285  | polymerase I and transcript release factor                                                  | -4.12 | 0.41 | 0.00 |
| A_52_P172283  | NM_130892 | Rtn4ip1   | 170728 | reticulon 4 interacting protein 1                                                           | -5.72 | 0.41 | 0.00 |
| A_52_P432919  | NM_031874 | Rab3d     | 19340  | RAB3D, member RAS oncogene family                                                           | -4.13 | 0.41 | 0.00 |
| A_51_P163906  | AK029828  | Tln2      | 70549  | talin 2                                                                                     | -4.46 | 0.41 | 0.00 |
| A_52_P668393  | AK028994  | Cyhr1     | 54151  | cysteine and histidine rich 1                                                               | -4.78 | 0.41 | 0.00 |
| A_51_P257762  | NM_020005 | Kat2b     | 18519  | K(lysine) acetyltransferase 2B                                                              | -4.32 | 0.41 | 0.00 |
| A_52_P535946  | NM_007856 | Dhcr7     | 13360  | 7-dehydrocholesterol reductase                                                              | -5.27 | 0.41 | 0.00 |
| A_52_P138727  | NM_153056 | Sirt7     | 209011 | sirtuin 7 (silent mating type information regulation 2, homolog) 7 ( <i>S. cerevisiae</i> ) | -8.92 | 0.41 | 0.00 |
| A_51_P465273  | NM_001029 | Mett11d1  | 52535  | methyltransferase 11 domain containing 1                                                    | -4.87 | 0.41 | 0.00 |
| A_52_P1085754 | BC079676  | 8430419L0 | 74525  | RIKEN cDNA 8430419L09 gene                                                                  | -3.99 | 0.41 | 0.00 |
| A_51_P407323  | NM_007976 | F5        | 14067  | coagulation factor V                                                                        | -3.48 | 0.41 | 0.01 |
| A_51_P496023  | NM_007453 | Prdx6     | 11758  | peroxiredoxin 6                                                                             | -4.84 | 0.41 | 0.00 |
| A_51_P232868  | NM_176995 | EG240055  | 240055 | predicted gene, EG240055                                                                    | -6.50 | 0.41 | 0.00 |
| A_52_P323151  | CD539668  | NA        | NA     | NA                                                                                          | -6.25 | 0.41 | 0.00 |
| A_52_P590396  | NM_019972 | Sort1     | 20661  | sortilin 1                                                                                  | -3.44 | 0.41 | 0.01 |
| A_51_P361150  | AK002772  | Pcp4l1    | 66425  | Purkinje cell protein 4-like 1                                                              | -2.80 | 0.41 | 0.04 |
| A_52_P77093   | NM_028166 | 1600014C1 | 72244  | RIKEN cDNA 1600014C10 gene                                                                  | -4.60 | 0.41 | 0.00 |
| A_52_P488011  | NA        | NA        | NA     | NA                                                                                          | -3.18 | 0.41 | 0.01 |
| A_51_P167097  | AK038845  | Crebl2    | 232430 | cAMP responsive element binding protein-like 2                                              | -3.68 | 0.41 | 0.00 |
| A_51_P488422  | NM_029475 | Adal      | 75894  | adenosine deaminase-like                                                                    | -3.34 | 0.41 | 0.01 |
| A_52_P83252   | NM_008281 | Hpn       | 15451  | hepsin                                                                                      | -5.05 | 0.41 | 0.00 |
| A_52_P239536  | NM_181595 | Ppp1r9a   | 243725 | protein phosphatase 1, regulatory (inhibitor) subunit 9A                                    | -3.65 | 0.41 | 0.00 |
| A_51_P475741  | NM_008866 | Lypla1    | 18777  | lysophospholipase 1                                                                         | -3.61 | 0.41 | 0.01 |
| A_51_P196596  | NM_030706 | Trim2     | 80890  | tripartite motif-containing 2                                                               | -3.21 | 0.41 | 0.01 |
| A_51_P367240  | NM_146173 | Tspan33   | 232670 | tetraspanin 33                                                                              | -4.95 | 0.41 | 0.00 |
| A_52_P33147   | AK086149  | Sox5      | 20678  | SRY-box containing gene 5                                                                   | -5.80 | 0.41 | 0.00 |
| A_51_P157902  | NM_009902 | Cldn3     | 12739  | claudin 3                                                                                   | -2.86 | 0.41 | 0.03 |
| A_52_P229972  | NM_009202 | Slc22a1   | 20517  | solute carrier family 22 (organic cation transporter), member 1                             | -5.25 | 0.41 | 0.00 |
| A_51_P327451  | NM_009653 | Alas2     | 11656  | aminolevulinic acid synthase 2, erythroid                                                   | -5.28 | 0.41 | 0.00 |
| A_52_P545181  | NM_021371 | Caln1     | 140904 | calneuron 1                                                                                 | -4.17 | 0.41 | 0.00 |

|              |                    |        |                                                                                                                   |       |      |      |
|--------------|--------------------|--------|-------------------------------------------------------------------------------------------------------------------|-------|------|------|
| A_51_P438865 | NM_025928 Pmf1     | 67037  | polyamine-modulated factor 1                                                                                      | -5.66 | 0.41 | 0.00 |
| A_51_P165934 | NM_008831 Phb      | 18673  | prohibitin                                                                                                        | -4.46 | 0.41 | 0.00 |
| A_52_P489373 | NM_173788 Npr2     | 230103 | natriuretic peptide receptor 2                                                                                    | -4.94 | 0.41 | 0.00 |
| A_52_P656565 | NM_145488 Pex6     | 224824 | peroxisomal biogenesis factor 6                                                                                   | -3.69 | 0.41 | 0.00 |
| A_52_P156540 | NM_013861 Tpk1     | 29807  | thiamine pyrophosphokinase                                                                                        | -3.17 | 0.41 | 0.01 |
| A_52_P325819 | AK137406 Yy1       | 22632  | YY1 transcription factor                                                                                          | -4.39 | 0.41 | 0.00 |
| A_52_P380997 | NA NA              | NA     | NA                                                                                                                | -5.51 | 0.41 | 0.00 |
| A_52_P414485 | AK164057 Rab23     | 19335  | RAB23, member RAS oncogene family                                                                                 | -5.39 | 0.41 | 0.00 |
| A_51_P322801 | NM_031877 Wasf1    | 83767  | WASP family 1                                                                                                     | -4.94 | 0.41 | 0.00 |
| A_51_P518488 | NM_007512 Atpif1   | 11983  | ATPase inhibitory factor 1                                                                                        | -4.85 | 0.41 | 0.00 |
| A_52_P6045   | NM_029522 Gpsm2    | 76123  | G-protein signalling modulator 2 (AGS3-like, C. elegans)                                                          | -4.54 | 0.41 | 0.00 |
| A_51_P247441 | NM_144870 Ndufs8   | 225887 | NADH dehydrogenase (ubiquinone) Fe-S protein 8                                                                    | -7.97 | 0.41 | 0.00 |
| A_52_P576041 | NM_016846 Rgl1     | 19731  | ral guanine nucleotide dissociation stimulator,-like 1                                                            | -4.87 | 0.41 | 0.00 |
| A_51_P479311 | NM_010358 Gstm1    | 14862  | glutathione S-transferase, mu 1                                                                                   | -2.92 | 0.41 | 0.03 |
| A_51_P305320 | NM_175383 B3gnt1   | 108902 | UDP-GlcNAc:betaGal beta-1,3-N-acetylglucosaminyltransferase 1                                                     | -4.64 | 0.41 | 0.00 |
| A_52_P655532 | NM_018817 Smarcal1 | 54380  | SWI/SNF related matrix associated, actin dependent regulator of chromatin, subfamily a-like 1                     | -5.83 | 0.41 | 0.00 |
| A_52_P466907 | NM_026276 Aasdhppt | 67618  | aminoadipate-semialdehyde dehydrogenase-phosphopantetheinyl transferase                                           | -4.03 | 0.41 | 0.00 |
| A_52_P68175  | NM_001033: C77080  | 97130  | expressed sequence C77080                                                                                         | -4.41 | 0.41 | 0.00 |
| A_52_P307893 | NM_054051 Pip4k2b  | 108083 | phosphatidylinositol-5-phosphate 4-kinase, type II, beta                                                          | -4.89 | 0.41 | 0.00 |
| A_52_P484691 | NM_026246 Mrpl49   | 18120  | mitochondrial ribosomal protein L49                                                                               | -3.73 | 0.41 | 0.00 |
| A_51_P193093 | NM_008819 Pemt     | 18618  | phosphatidylethanolamine N-methyltransferase                                                                      | -3.93 | 0.41 | 0.00 |
| A_52_P989584 | NA NA              | NA     | NA                                                                                                                | -6.97 | 0.41 | 0.00 |
| A_52_P185014 | NM_145152 Lrrc3    | 237387 | leucine rich repeat containing 3                                                                                  | -7.57 | 0.41 | 0.00 |
| A_52_P449768 | NM_025939 Paics    | 67054  | phosphoribosylaminoimidazole carboxylase, phosphoribosylaminoribosylaminoimidazole, succinocarboxamide synthetase | -4.36 | 0.41 | 0.00 |



|              |           |            |        |                                                                                                               |       |      |      |
|--------------|-----------|------------|--------|---------------------------------------------------------------------------------------------------------------|-------|------|------|
| A_52_P185639 | NM_175137 | Vars2      | 68915  | valyl-tRNA synthetase 2, mitochondrial (putative)                                                             | -3.43 | 0.41 | 0.01 |
| A_51_P135012 | NM_027897 | Rhpn2      | 52428  | rhophilin, Rho GTPase binding protein 2                                                                       | -3.64 | 0.41 | 0.00 |
| A_52_P400224 | NM_016892 | Ccs        | 12460  | copper chaperone for superoxide dismutase                                                                     | -6.77 | 0.41 | 0.00 |
| A_51_P197509 | NM_153594 | Pcmt2      | 245867 | protein-L-isoaspartate (D-aspartate) O-methyltransferase domain containing 2                                  | -4.91 | 0.41 | 0.00 |
| A_52_P98531  | BC031139  | Nlrp6      | 101613 | NLR family, pyrin domain containing 6                                                                         | -4.13 | 0.41 | 0.00 |
| A_51_P343900 | NM_009532 | Xrcc1      | 22594  | X-ray repair complementing defective repair in Chinese hamster cells 1                                        | -3.56 | 0.41 | 0.01 |
| A_51_P217382 | AK173007  | Kif1c      | 16562  | kinesin family member 1C                                                                                      | -5.44 | 0.41 | 0.00 |
| A_51_P241465 | NM_146120 | Gsn        | 227753 | gelsolin                                                                                                      | -3.82 | 0.41 | 0.00 |
| A_51_P177984 | NM_207217 | Itfg3      | 106581 | integrin alpha FG-GAP repeat containing 3                                                                     | -4.35 | 0.40 | 0.00 |
| A_52_P333902 | NM_001033 | Slc4a7     | 218756 | solute carrier family 4, sodium bicarbonate cotransporter, member 7                                           | -4.28 | 0.40 | 0.00 |
| A_52_P351574 | NM_019677 | Plcb1      | 18795  | phospholipase C, beta 1                                                                                       | -2.93 | 0.40 | 0.02 |
| A_51_P342200 | XM_134476 | 2310039D2  | 75704  | RIKEN cDNA 2310039D24 gene                                                                                    | -4.03 | 0.40 | 0.00 |
| A_51_P385598 | NM_008063 | Slc37a4    | 14385  | solute carrier family 37 (glucose-6-phosphate transporter), member 4                                          | -3.04 | 0.40 | 0.02 |
| A_51_P176769 | XM_355812 | Lpar5      | 381810 | lysophosphatidic acid receptor 5                                                                              | -3.55 | 0.40 | 0.01 |
| A_51_P178887 | NM_008642 | Mttp       | 17777  | microsomal triglyceride transfer protein                                                                      | -3.58 | 0.40 | 0.01 |
| A_51_P331737 | NM_146197 | Acsm2      | 233799 | acyl-CoA synthetase medium-chain family member 2                                                              | -4.00 | 0.40 | 0.00 |
| A_51_P451759 | BC020147  | Rab3il1    | 74760  | RAB3A interacting protein (rabin3)-like 1                                                                     | -7.91 | 0.40 | 0.00 |
| A_51_P432420 | NM_009734 | Azi1       | 12009  | 5-azacytidine induced gene 1                                                                                  | -3.51 | 0.40 | 0.01 |
| A_52_P496810 | NM_011734 | Siae       | 22619  | sialic acid acetyltransferase                                                                                 | -5.21 | 0.40 | 0.00 |
| A_52_P589754 | NM_207675 | Cadm1      | 54725  | cell adhesion molecule 1                                                                                      | -3.00 | 0.40 | 0.02 |
| A_51_P284997 | NM_016973 | St6galnac6 | 50935  | ST6 (alpha-N-acetyl-neuraminyl-2,3-beta-galactosyl-1,3)-N-acetylgalactosaminide alpha-2,6-sialyltransferase 6 | -4.82 | 0.40 | 0.00 |
| A_52_P636999 | XM_129951 | NA         | NA     | NA                                                                                                            | -5.39 | 0.40 | 0.00 |
| A_51_P114456 | AK018110  | 2210012G0  | 66526  | RIKEN cDNA 2210012G02 gene                                                                                    | -6.54 | 0.40 | 0.00 |
| A_51_P439645 | NM_029296 | 1700001C1  | 75462  | RIKEN cDNA 1700001C19 gene                                                                                    | -3.75 | 0.40 | 0.00 |
| A_51_P273684 | NM_028803 | Gbe1       | 74185  | glucan (1,4-alpha-), branching enzyme 1                                                                       | -5.53 | 0.40 | 0.00 |
| A_52_P201972 | AK037342  | Zfp148     | 22661  | zinc finger protein 148                                                                                       | -3.96 | 0.40 | 0.00 |

|              |           |            |        |                                                                                       |       |      |      |
|--------------|-----------|------------|--------|---------------------------------------------------------------------------------------|-------|------|------|
| A_51_P305453 | NA        | NA         | NA     | NA                                                                                    | -7.42 | 0.40 | 0.00 |
| A_52_P251183 | NM_175106 | Tmem177    | 66343  | transmembrane protein 177                                                             | -6.23 | 0.40 | 0.00 |
| A_52_P388072 | NM_145942 | Hmgcs1     | 208715 | 3-hydroxy-3-methylglutaryl-Coenzyme A synthase 1                                      | -2.72 | 0.40 | 0.05 |
| A_51_P423308 | NM_008342 | Igfbp2     | 16008  | insulin-like growth factor binding protein 2                                          | -3.11 | 0.40 | 0.02 |
| A_52_P385606 | NM_021273 | Ckb        | 12709  | creatine kinase, brain                                                                | -4.69 | 0.40 | 0.00 |
| A_51_P331207 | NM_025464 | Tmem218    | 66279  | transmembrane protein 218                                                             | -3.50 | 0.40 | 0.01 |
| A_52_P492069 | NA        | NA         | NA     | NA                                                                                    | -8.18 | 0.40 | 0.00 |
| A_51_P500544 | NM_025813 | Mfsd1      | 66868  | major facilitator superfamily domain containing 1                                     | -6.34 | 0.40 | 0.00 |
| A_51_P229547 | NM_020252 | Nrxn1      | 18189  | neurexin I                                                                            | -4.30 | 0.40 | 0.00 |
| A_51_P200867 | NM_029624 | Lmf1       | 76483  | lipase maturation factor 1                                                            | -4.72 | 0.40 | 0.00 |
| A_51_P251717 | NM_026304 | I7Rn6      | 67669  | lethal, Chr 7, Rinchik 6                                                              | -3.63 | 0.40 | 0.00 |
| A_51_P315941 | AK016167  | Prkd3      | 75292  | protein kinase D3                                                                     | -2.69 | 0.40 | 0.05 |
| A_52_P142761 | AK035750  | Pdcd6ip    | 18571  | programmed cell death 6 interacting protein                                           | -3.76 | 0.40 | 0.00 |
| A_51_P204831 | M13018    | Crip1      | 12925  | cysteine-rich protein 1 (intestinal)                                                  | -4.05 | 0.40 | 0.00 |
| A_51_P430678 | AK004405  | Xrcc6bp1   | 68876  | XRCC6 binding protein 1                                                               | -3.95 | 0.40 | 0.00 |
| A_52_P260994 | NM_013710 | Fgd2       | 26382  | FYVE, RhoGEF and PH domain containing 2                                               | -4.20 | 0.40 | 0.00 |
| A_52_P539161 | NM_021557 | Rdh11      | 17252  | retinol dehydrogenase 11                                                              | -4.79 | 0.40 | 0.00 |
| A_51_P196113 | NM_019945 | Mast1      | 56527  | microtubule associated serine/threonine kinase 1                                      | -5.88 | 0.40 | 0.00 |
| A_51_P282667 | NM_010421 | Hexa       | 15211  | hexosaminidase A                                                                      | -5.53 | 0.40 | 0.00 |
| A_51_P101347 | AK030875  | Pls1       | 102502 | plastin 1 (I-isoform)                                                                 | -3.18 | 0.40 | 0.01 |
| A_51_P229875 | AK147402  | E330009J07 | 243780 | RIKEN cDNA E330009J07 gene                                                            | -3.44 | 0.40 | 0.01 |
| A_52_P112676 | NM_025455 | Ccdc28b    | 66264  | coiled coil domain containing 28B                                                     | -4.20 | 0.40 | 0.00 |
| A_52_P338956 | XM_203596 | NA         | NA     | NA                                                                                    | -3.69 | 0.40 | 0.00 |
| A_52_P18972  | NM_146141 | Ppa2       | 74776  | pyrophosphatase (inorganic) 2                                                         | -6.96 | 0.40 | 0.00 |
| A_52_P102223 | NM_018814 | Pcnx       | 54604  | pecanex homolog (Drosophila)                                                          | -6.53 | 0.40 | 0.00 |
| A_51_P133369 | NM_016717 | Scly       | 50880  | selenocysteine lyase                                                                  | -4.51 | 0.40 | 0.00 |
| A_52_P374642 | NM_145614 | Dlat       | 235339 | dihydrolipoamide S-acetyltransferase (E2 component of pyruvate dehydrogenase complex) | -5.77 | 0.40 | 0.00 |
| A_51_P482711 | NM_053272 | Dhcr24     | 74754  | 24-dehydrocholesterol reductase                                                       | -3.79 | 0.40 | 0.00 |
| A_51_P303433 | NM_172540 | Trmt2b     | 215201 | TRM2 tRNA methyltransferase 2 homolog B (S. cerevisiae)                               | -4.89 | 0.40 | 0.00 |

|              |           |           |        |                                                              |       |      |      |
|--------------|-----------|-----------|--------|--------------------------------------------------------------|-------|------|------|
| A_51_P402225 | XM_203596 | NA        | NA     | NA                                                           | -4.14 | 0.40 | 0.00 |
| A_51_P457113 | NM_011250 | Rbl2      | 19651  | retinoblastoma-like 2                                        | -3.36 | 0.40 | 0.01 |
| A_52_P598478 | AK145337  | Chchd3    | 66075  | coiled-coil-helix-coiled-coil-helix domain containing 3      | -5.84 | 0.40 | 0.00 |
| A_51_P500051 | NM_019923 | Itpr2     | 16439  | inositol 1,4,5-triphosphate receptor 2                       | -3.77 | 0.40 | 0.00 |
| A_51_P416080 | NM_144552 | Stxbp6    | 217517 | syntaxin binding protein 6 (amisyn)                          | -4.03 | 0.40 | 0.00 |
| A_51_P368543 | NM_022419 | Abhd8     | 64296  | abhydrolase domain containing 8                              | -4.78 | 0.40 | 0.00 |
| A_52_P44914  | NM_177406 | Cyp4a12a  | 277753 | cytochrome P450, family 4, subfamily a, polypeptide 12a      | -3.41 | 0.40 | 0.01 |
| A_51_P118712 | NM_010047 | Dgcr6     | 13353  | DiGeorge syndrome critical region gene 6                     | -4.77 | 0.40 | 0.00 |
| A_51_P352057 | NM_008819 | Pemt      | 18618  | phosphatidylethanolamine N-methyltransferase                 | -4.09 | 0.40 | 0.00 |
| A_51_P477768 | NM_198616 | Ccdc85b   | 240514 | coiled-coil domain containing 85B                            | -5.04 | 0.40 | 0.00 |
| A_51_P416613 | AK082166  | 1810058I2 | 67705  | RIKEN cDNA 1810058I24 gene                                   | -7.19 | 0.40 | 0.00 |
| A_51_P155503 | NM_008457 | Klk1b8    | 16624  | kallikrein 1-related peptidase b8                            | -5.74 | 0.40 | 0.00 |
| A_52_P54106  | AK034547  | Ghr       | 14600  | growth hormone receptor                                      | -3.50 | 0.40 | 0.01 |
| A_52_P432570 | NM_175343 | Chdh      | 218865 | choline dehydrogenase                                        | -4.52 | 0.40 | 0.00 |
| A_52_P626329 | NA        | NA        | NA     | NA                                                           | -3.86 | 0.40 | 0.00 |
| A_52_P868798 | NA        | NA        | NA     | NA                                                           | -4.23 | 0.40 | 0.00 |
| A_52_P561236 | NM_029752 | Bri3bp    | 76809  | Bri3 binding protein                                         | -6.97 | 0.40 | 0.00 |
| A_51_P487308 | NM_001039 | Pstk      | 214580 | phosphoseryl-tRNA kinase                                     | -4.00 | 0.40 | 0.00 |
| A_51_P171107 | NM_026239 | Tmem35    | 67564  | transmembrane protein 35                                     | -3.36 | 0.40 | 0.01 |
| A_52_P282741 | NM_011520 | Sdc3      | 20970  | syndecan 3                                                   | -5.90 | 0.40 | 0.00 |
| A_51_P269166 | NM_021412 | Mmp19     | 58223  | matrix metalloproteinase 19                                  | -7.75 | 0.40 | 0.00 |
| A_51_P373082 | AF027707  | Bok       | 51800  | BCL2-related ovarian killer protein                          | -3.81 | 0.40 | 0.00 |
| A_51_P509384 | NM_178713 | Aldh8a1   | 237320 | aldehyde dehydrogenase 8 family, member A1                   | -3.19 | 0.40 | 0.01 |
| A_51_P286327 | NM_175646 | Txnl4b    | 234723 | thioredoxin-like 4B                                          | -5.04 | 0.40 | 0.00 |
| A_51_P132978 | NM_010497 | Idh1      | 15926  | isocitrate dehydrogenase 1 (NADP+), soluble                  | -3.64 | 0.40 | 0.00 |
| A_51_P106538 | NM_030127 | Htra3     | 78558  | HtrA serine peptidase 3                                      | -3.16 | 0.39 | 0.01 |
| A_52_P672740 | NM_019491 | Rala      | 56044  | v-ral simian leukemia viral oncogene homolog A (ras related) | -4.67 | 0.39 | 0.00 |
| A_51_P496309 | NM_001024 | Rfx4      | 71137  | regulatory factor X, 4 (influences HLA class II expression)  | -3.89 | 0.39 | 0.00 |
| A_51_P187697 | NM_028984 | 8430406I0 | 74528  | RIKEN cDNA 8430406I07 gene                                   | -5.24 | 0.39 | 0.00 |
| A_51_P448466 | NM_010767 | Masp2     | 17175  | mannan-binding lectin serine peptidase 2                     | -5.16 | 0.39 | 0.00 |

|              |           |           |        |                                                                                  |       |      |      |
|--------------|-----------|-----------|--------|----------------------------------------------------------------------------------|-------|------|------|
| A_51_P231979 | NM_013472 | Anxa6     | 11749  | annexin A6                                                                       | -5.33 | 0.39 | 0.00 |
| A_51_P512820 | NM_172733 | Dera      | 232449 | 2-deoxyribose-5-phosphate aldolase homolog (C. elegans)                          | -2.89 | 0.39 | 0.03 |
| A_51_P519369 | NM_023328 | Agtpbp1   | 67269  | ATP/GTP binding protein 1                                                        | -5.30 | 0.39 | 0.00 |
| A_51_P249118 | NM_008830 | Abcb4     | 18670  | ATP-binding cassette, sub-family B (MDR/TAP), member 4                           | -3.10 | 0.39 | 0.02 |
| A_51_P295286 | AK006906  | 1700066M  | 73467  | RIKEN cDNA 1700066M21 gene                                                       | -5.37 | 0.39 | 0.00 |
| A_52_P423188 | AF245475  | Mlxipl    | 58805  | MLX interacting protein-like                                                     | -4.92 | 0.39 | 0.00 |
| A_52_P93256  | NM_011923 | Angptl2   | 26360  | angiopoietin-like 2                                                              | -7.38 | 0.39 | 0.00 |
| A_51_P484200 | NM_153777 | Lrrc56    | 70552  | leucine rich repeat containing 56                                                | -3.88 | 0.39 | 0.00 |
| A_51_P122170 | NM_017473 | Rdh7      | 54150  | retinol dehydrogenase 7                                                          | -3.82 | 0.39 | 0.00 |
| A_52_P88695  | NM_016811 | Dgka      | 13139  | diacylglycerol kinase, alpha                                                     | -4.37 | 0.39 | 0.00 |
| A_51_P180994 | BC025200  | 3110073HC | 73201  | RIKEN cDNA 3110073H01 gene                                                       | -5.82 | 0.39 | 0.00 |
| A_51_P334019 | NM_133684 | Mosc2     | 67247  | MOCO sulphurase C-terminal domain containing 2                                   | -5.78 | 0.39 | 0.00 |
| A_52_P633410 | NM_020590 | Gabarapl1 | 57436  | gamma-aminobutyric acid (GABA) A receptor-associated protein-like 1              | -6.21 | 0.39 | 0.00 |
| A_52_P669005 | NM_023624 | Lrat      | 79235  | lecithin-retinol acyltransferase (phosphatidylcholine-retinol-O-acyltransferase) | -3.34 | 0.39 | 0.01 |
| A_52_P420394 | NM_146226 | Apeh      | 235606 | acylpeptide hydrolase                                                            | -5.55 | 0.39 | 0.00 |
| A_52_P526724 | NM_133249 | Ppargc1b  | 170826 | peroxisome proliferative activated receptor, gamma, coactivator 1 beta           | -3.13 | 0.39 | 0.01 |
| A_51_P425254 | NM_145519 | Farp2     | 227377 | FERM, RhoGEF and pleckstrin domain protein 2                                     | -5.71 | 0.39 | 0.00 |
| A_51_P260035 | NM_025535 | Sar1b     | 66397  | SAR1 gene homolog B (S. cerevisiae)                                              | -6.43 | 0.39 | 0.00 |
| A_51_P119932 | NM_175164 | Arhgap26  | 71302  | Rho GTPase activating protein 26                                                 | -2.91 | 0.39 | 0.03 |
| A_51_P236439 | NM_177322 | Agtr1a    | 11607  | angiotensin II receptor, type 1a                                                 | -3.97 | 0.39 | 0.00 |
| A_51_P165617 | NM_172745 | Tufm      | 233870 | Tu translation elongation factor, mitochondrial                                  | -5.32 | 0.39 | 0.00 |
| A_52_P480360 | NM_023595 | Dut       | 110074 | deoxyuridine triphosphatase                                                      | -3.89 | 0.39 | 0.00 |
| A_52_P512365 | NM_009894 | Cideb     | 12684  | cell death-inducing DNA fragmentation factor, alpha subunit-like effector B      | -3.11 | 0.39 | 0.01 |
| A_52_P543079 | XM_140800 | NA        | NA     | NA                                                                               | -5.38 | 0.39 | 0.00 |
| A_52_P94845  | NM_025449 | Nicn1     | 66257  | nicolin 1                                                                        | -3.49 | 0.39 | 0.01 |
| A_51_P419971 | BU515288  | Tmem106k  | 71900  | transmembrane protein 106B                                                       | -5.10 | 0.39 | 0.00 |
| A_51_P402414 | NM_025504 | Atp5sl    | 66349  | ATP5S-like                                                                       | -6.15 | 0.39 | 0.00 |

|              |           |           |        |                                                                                                   |       |      |      |
|--------------|-----------|-----------|--------|---------------------------------------------------------------------------------------------------|-------|------|------|
| A_51_P166152 | NM_029269 | Spp2      | 75396  | secreted phosphoprotein 2                                                                         | -5.55 | 0.39 | 0.00 |
| A_52_P378791 | NM_153514 | Rhobtb2   | 246710 | Rho-related BTB domain containing 2                                                               | -4.49 | 0.39 | 0.00 |
| A_51_P343429 | NM_026331 | Slc25a37  | 67712  | solute carrier family 25, member 37                                                               | -4.96 | 0.39 | 0.00 |
| A_52_P251615 | NM_198249 | E130112L2 | 268739 | RIKEN cDNA E130112L23 gene                                                                        | -3.84 | 0.39 | 0.00 |
| A_51_P367395 | NM_138583 | D16H22S6E | 27883  | DNA segment, Chr 16, human D22S680E, expressed                                                    | -4.81 | 0.39 | 0.00 |
| A_51_P490136 | NM_011896 | Spry1     | 24063  | sprouty homolog 1 (Drosophila)                                                                    | -3.61 | 0.39 | 0.01 |
| A_51_P485421 | AK088666  | Igh-6     | 16019  | immunoglobulin heavy chain 6 (heavy chain of IgM)                                                 | -3.48 | 0.39 | 0.01 |
| A_52_P476431 | NM_021292 | Evc       | 59056  | Ellis van Creveld gene homolog (human)                                                            | -6.52 | 0.39 | 0.00 |
| A_52_P179698 | NM_025412 | Pycrl     | 66194  | pyrroline-5-carboxylate reductase-like                                                            | -3.63 | 0.39 | 0.00 |
| A_51_P391082 | NM_007386 | Aco1      | 11428  | aconitase 1                                                                                       | -4.64 | 0.39 | 0.00 |
| A_51_P494825 | BC082308  | Mfhas1    | 52065  | malignant fibrous histiocytoma amplified sequence 1                                               | -4.80 | 0.39 | 0.00 |
| A_51_P276943 | NM_016696 | Gpc1      | 14733  | glypican 1                                                                                        | -3.47 | 0.39 | 0.01 |
| A_51_P155966 | NM_029797 | Mnd1      | 76915  | meiotic nuclear divisions 1 homolog (S. cerevisiae)                                               | -5.23 | 0.39 | 0.00 |
| A_51_P229911 | NM_080435 | Adcy4     | 104110 | adenylate cyclase 4                                                                               | -6.84 | 0.39 | 0.00 |
| A_52_P329408 | AK147591  | Sipa1l1   | 217692 | signal-induced proliferation-associated 1 like 1                                                  | -6.25 | 0.39 | 0.00 |
| A_52_P679105 | NM_029614 | Prss23    | 76453  | protease, serine, 23                                                                              | -3.05 | 0.39 | 0.02 |
| A_52_P176619 | AK028297  | 2610110G1 | 173242 | RIKEN cDNA 2610110G12 gene                                                                        | -3.64 | 0.39 | 0.00 |
| A_51_P477419 | NM_008688 | Nfic      | 18029  | nuclear factor I/C                                                                                | -4.13 | 0.39 | 0.00 |
| A_51_P326346 | AK090384  | Ppa2      | 74776  | pyrophosphatase (inorganic) 2                                                                     | -6.59 | 0.39 | 0.00 |
| A_52_P520341 | NM_177194 | A130023I2 | 320569 | RIKEN cDNA A130023I24 gene                                                                        | -2.96 | 0.39 | 0.02 |
| A_51_P480982 | NM_025374 | Glo1      | 109801 | glyoxalase 1                                                                                      | -3.72 | 0.39 | 0.00 |
| A_51_P503937 | NM_009790 | Calm1     | 12313  | calmodulin 1                                                                                      | -3.40 | 0.39 | 0.01 |
| A_52_P633393 | NM_133687 | Cxxc5     | 67393  | CXXC finger 5                                                                                     | -7.50 | 0.39 | 0.00 |
| A_51_P450052 | NM_026003 | Smarca2   | 67155  | SWI/SNF related, matrix associated, actin dependent regulator of chromatin, subfamily a, member 2 | -3.69 | 0.39 | 0.00 |
| A_52_P337259 | NM_013905 | Heyl      | 56198  | hairy/enhancer-of-split related with YRPW motif-like                                              | -5.04 | 0.39 | 0.00 |
| A_51_P366513 | NM_011864 | Papss2    | 23972  | 3'-phosphoadenosine 5'-phosphosulfate synthase 2                                                  | -3.93 | 0.39 | 0.00 |

|               |           |                 |        |                                                                                         |       |      |      |
|---------------|-----------|-----------------|--------|-----------------------------------------------------------------------------------------|-------|------|------|
| A_51_P336910  | NM_026719 | Lmbrd1          | 68421  | LMBR1 domain containing 1                                                               | -4.36 | 0.39 | 0.00 |
| A_51_P138673  | NM_175244 | Hectd3          | 76608  | HECT domain containing 3                                                                | -9.72 | 0.39 | 0.00 |
| A_51_P117995  | NM_021514 | Pfkm            | 18642  | phosphofructokinase, muscle<br>amyotrophic lateral sclerosis 2 (juvenile) homolog       | -4.18 | 0.39 | 0.00 |
| A_51_P180061  | NM_028717 | Als2            | 74018  | (human)                                                                                 | -3.12 | 0.39 | 0.01 |
| A_52_P660945  | NM_019861 | Ctsf            | 56464  | cathepsin F<br>microtubule-associated protein, RP/EB family, member                     | -5.86 | 0.39 | 0.00 |
| A_51_P438149  | NM_153058 | Mapre2          | 212307 | 2                                                                                       | -4.70 | 0.39 | 0.00 |
| A_51_P230904  | NM_019877 | Copz2           | 56358  | coatamer protein complex, subunit zeta 2                                                | -5.30 | 0.39 | 0.00 |
| A_51_P341169  | NM_021366 | Klf13           | 50794  | Kruppel-like factor 13                                                                  | -6.40 | 0.39 | 0.00 |
| A_51_P287001  | NM_019503 | Fxyd1           | 56188  | FXD domain-containing ion transport regulator 1                                         | -7.68 | 0.39 | 0.00 |
| A_52_P293076  | NM_007998 | Fech            | 14151  | ferrochelatase<br>potassium voltage-gated channel, subfamily Q, member                  | -6.18 | 0.39 | 0.00 |
| A_51_P194883  | NM_008434 | Kcnq1           | 16535  | 1                                                                                       | -5.72 | 0.39 | 0.00 |
| A_51_P420037  | NM_018815 | Nup210          | 54563  | nucleoporin 210                                                                         | -5.64 | 0.39 | 0.00 |
| A_52_P1012460 | AK145625  | NA              | NA     | NA                                                                                      | -6.70 | 0.39 | 0.00 |
| A_52_P442585  | NM_010365 | Gtf2i           | 14886  | general transcription factor II I<br>NADH dehydrogenase (ubiquinone) 1 beta subcomplex, | -2.90 | 0.39 | 0.03 |
| A_51_P516615  | NM_026684 | Ndufb10         | 68342  | 10                                                                                      | -6.18 | 0.39 | 0.00 |
| A_51_P251367  | NM_181344 | C1rl            | 232371 | complement component 1, r subcomponent-like                                             | -4.75 | 0.39 | 0.00 |
| A_52_P516091  | NM_133792 | Pla2g15         | 192654 | phospholipase A2, group XV                                                              | -4.90 | 0.39 | 0.00 |
| A_52_P59681   | NM_008287 | Hrsp12          | 15473  | heat-responsive protein 12                                                              | -4.37 | 0.39 | 0.00 |
| A_52_P409868  | AK050087  | C730014E0319990 |        | RIKEN cDNA C730014E05 gene                                                              | -5.53 | 0.39 | 0.00 |
| A_52_P419247  | NM_030706 | Trim2           | 80890  | tripartite motif-containing 2                                                           | -3.98 | 0.39 | 0.00 |
| A_51_P158598  | NM_146027 | Scrn2           | 217140 | secernin 2                                                                              | -4.27 | 0.39 | 0.00 |
| A_51_P159189  | NM_010565 | Inhbc           | 16325  | inhibin beta-C<br>cytidine monophospho-N-acetylneuraminic acid                          | -4.41 | 0.39 | 0.00 |
| A_51_P172917  | NM_007717 | Cmah            | 12763  | hydroxylase                                                                             | -4.34 | 0.39 | 0.00 |
| A_52_P241742  | AK008077  | 2010003O066434  |        | RIKEN cDNA 2010003O02 gene                                                              | -4.62 | 0.39 | 0.00 |
| A_52_P478420  | AK086555  | Cyp2d22         | 56448  | cytochrome P450, family 2, subfamily d, polypeptide 22                                  | -4.10 | 0.39 | 0.00 |
| A_51_P371490  | NM_031875 | Otof            | 83762  | otoferlin                                                                               | -3.37 | 0.39 | 0.01 |
| A_51_P234788  | NM_133687 | Cxxc5           | 67393  | CXXC finger 5                                                                           | -6.34 | 0.39 | 0.00 |

|              |           |           |        |                                                             |       |      |      |
|--------------|-----------|-----------|--------|-------------------------------------------------------------|-------|------|------|
| A_51_P236118 | U52523    | Ptpn18    | 19253  | protein tyrosine phosphatase, non-receptor type 18          | -5.63 | 0.39 | 0.00 |
| A_52_P452599 | NM_133217 | Bco2      | 170752 | beta-carotene oxygenase 2                                   | -5.75 | 0.39 | 0.00 |
| A_51_P150964 | NM_008809 | Pdgfrb    | 18596  | platelet derived growth factor receptor, beta polypeptide   | -5.03 | 0.39 | 0.00 |
| A_51_P267904 | AK082857  | 9030420J0 | 71544  | RIKEN cDNA 9030420J04 gene                                  | -5.13 | 0.39 | 0.00 |
| A_51_P444264 | NM_153457 | Rtn1      | 104001 | reticulon 1                                                 | -5.02 | 0.39 | 0.00 |
| A_52_P421133 | NM_007533 | Bckdha    | 12039  | branched chain ketoacid dehydrogenase E1, alpha polypeptide | -7.28 | 0.38 | 0.00 |
| A_51_P520139 | XM_620762 | Gm5918    | 546143 | predicted gene 5918                                         | -4.32 | 0.38 | 0.00 |
| A_51_P161890 | NM_010189 | Fcgrt     | 14132  | Fc receptor, IgG, alpha chain transporter                   | -5.28 | 0.38 | 0.00 |
| A_52_P159232 | NM_001039 | Ceacam1   | 26365  | carcinoembryonic antigen-related cell adhesion molecule 1   | -3.51 | 0.38 | 0.01 |
| A_51_P419726 | NM_011218 | Ptprs     | 19280  | protein tyrosine phosphatase, receptor type, S              | -4.76 | 0.38 | 0.00 |
| A_52_P456977 | NM_016874 | Deaf1     | 54006  | deformed epidermal autoregulatory factor 1 (Drosophila)     | -5.99 | 0.38 | 0.00 |
| A_51_P481968 | NM_026036 | Cmtm6     | 67213  | CKLF-like MARVEL transmembrane domain containing 6          | -4.69 | 0.38 | 0.00 |
| A_52_P633550 | AK053579  | Ghr       | 14600  | growth hormone receptor                                     | -4.08 | 0.38 | 0.00 |
| A_52_P541175 | NM_183195 | Marveld1  | 277010 | MARVEL (membrane-associating) domain containing 1           | -3.97 | 0.38 | 0.00 |
| A_51_P417469 | NM_026616 | Rnaseh2c  | 68209  | ribonuclease H2, subunit C                                  | -5.95 | 0.38 | 0.00 |
| A_51_P503433 | NM_080555 | Ppap2b    | 67916  | phosphatidic acid phosphatase type 2B                       | -6.05 | 0.38 | 0.00 |
| A_51_P392090 | NM_133683 | Tmem19    | 67226  | transmembrane protein 19                                    | -3.13 | 0.38 | 0.01 |
| A_52_P627357 | NM_205536 | Elk3      | 13713  | ELK3, member of ETS oncogene family                         | -3.30 | 0.38 | 0.01 |
| A_51_P154417 | NM_010180 | Fbln1     | 14114  | fibulin 1                                                   | -2.74 | 0.38 | 0.05 |
| A_52_P282035 | NM_019403 | Rnf5      | 54197  | ring finger protein 5                                       | -4.04 | 0.38 | 0.00 |
| A_51_P130374 | NM_013690 | Tek       | 21687  | endothelial-specific receptor tyrosine kinase               | -3.10 | 0.38 | 0.02 |
| A_51_P381373 | AK140411  | Wwp1      | 107568 | WW domain containing E3 ubiquitin protein ligase 1          | -3.03 | 0.38 | 0.02 |
| A_52_P64383  | NM_023184 | Klf15     | 66277  | Kruppel-like factor 15                                      | -6.15 | 0.38 | 0.00 |
| A_51_P253824 | AK008211  | Mgst3     | 66447  | microsomal glutathione S-transferase 3                      | -4.47 | 0.38 | 0.00 |
| A_51_P376207 | NM_146948 | Olf342    | 258950 | olfactory receptor 342                                      | -2.71 | 0.38 | 0.05 |
| A_52_P20639  | NM_023727 | Rd3       | 74023  | retinal degeneration 3                                      | -4.78 | 0.38 | 0.00 |

|               |           |           |        |                                                                                                                |       |      |      |
|---------------|-----------|-----------|--------|----------------------------------------------------------------------------------------------------------------|-------|------|------|
| A_52_P304028  | NM_053158 | Mrpl1     | 94061  | mitochondrial ribosomal protein L1                                                                             | -6.60 | 0.38 | 0.00 |
| A_52_P537459  | NM_027016 | Sec62     | 69276  | SEC62 homolog (S. cerevisiae)                                                                                  | -5.65 | 0.38 | 0.00 |
| A_51_P509140  | NM_170760 | U2af1l4   | 233073 | U2 small nuclear RNA auxiliary factor 1-like 4                                                                 | -5.11 | 0.38 | 0.00 |
| A_51_P449795  | NM_007763 | Crip1     | 12925  | cysteine-rich protein 1 (intestinal)                                                                           | -4.03 | 0.38 | 0.00 |
| A_51_P512629  | AK009255  | Ttll5     | 320244 | tubulin tyrosine ligase-like family, member 5                                                                  | -5.36 | 0.38 | 0.00 |
| A_52_P296109  | AK078667  | Cstf1     | 67337  | cleavage stimulation factor, 3' pre-RNA, subunit 1<br>spermatogenesis and oogenesis specific basic helix-loop- | -5.21 | 0.38 | 0.00 |
| A_51_P378699  | NM_028937 | Sohlh2    | 74434  | helix 2                                                                                                        | -3.38 | 0.38 | 0.01 |
| A_52_P155692  | NM_009176 | St3gal3   | 20441  | ST3 beta-galactoside alpha-2,3-sialyltransferase 3                                                             | -5.87 | 0.38 | 0.00 |
| A_51_P483576  | NA        | NA        | NA     | NA                                                                                                             | -3.76 | 0.38 | 0.00 |
| A_52_P150950  | NM_153157 | Olfm3     | 229759 | olfactomedin 3                                                                                                 | -6.71 | 0.38 | 0.00 |
| A_51_P394354  | NM_027464 | 5730469M  | 70564  | RIKEN cDNA 5730469M10 gene                                                                                     | -5.99 | 0.38 | 0.00 |
| A_51_P184353  | NM_010150 | Nr2f6     | 13864  | nuclear receptor subfamily 2, group F, member 6<br>solute carrier family 2 (facilitated glucose transporter),  | -4.57 | 0.38 | 0.00 |
| A_52_P184594  | NM_001012 | Slc2a9    | 117591 | member 9                                                                                                       | -8.32 | 0.38 | 0.00 |
| A_51_P392223  | BC019573  | 1810048J1 | 67708  | RIKEN cDNA 1810048J11 gene                                                                                     | -4.36 | 0.38 | 0.00 |
| A_51_P429567  | NM_053106 | Lmod1     | 93689  | leiomodien 1 (smooth muscle)                                                                                   | -2.74 | 0.38 | 0.05 |
| A_52_P682099  | BC058650  | Fam149b   | 105428 | family with sequence similarity 149, member B                                                                  | -7.61 | 0.38 | 0.00 |
| A_52_P54176   | NM_015732 | Axin2     | 12006  | axin2                                                                                                          | -4.63 | 0.38 | 0.00 |
| A_52_P633163  | NM_008650 | Mut       | 17850  | methyalmalonyl-Coenzyme A mutase                                                                               | -4.77 | 0.38 | 0.00 |
| A_51_P155843  | XM_887155 | Igsf10    | 242050 | immunoglobulin superfamily, member 10                                                                          | -6.60 | 0.38 | 0.00 |
| A_52_P318053  | NA        | NA        | NA     | NA                                                                                                             | -5.32 | 0.38 | 0.00 |
| A_51_P313761  | NM_028230 | Shmt2     | 108037 | serine hydroxymethyltransferase 2 (mitochondrial)                                                              | -5.23 | 0.38 | 0.00 |
| A_52_P314349  | AK050104  | Acnat1    | 230161 | acyl-coenzyme A amino acid N-acyltransferase 1<br>Sep (O-phosphoserine) tRNA:Sec (selenocysteine) tRNA         | -2.70 | 0.38 | 0.05 |
| A_52_P358090  | AK153792  | Sepsecs   | 211006 | synthase                                                                                                       | -3.46 | 0.38 | 0.01 |
| A_52_P1064707 | NA        | NA        | NA     | NA                                                                                                             | -5.36 | 0.38 | 0.00 |
| A_51_P426270  | NM_008597 | Mgp       | 17313  | matrix Gla protein                                                                                             | -3.11 | 0.38 | 0.01 |
| A_52_P764924  | AV036172  | NA        | NA     | NA                                                                                                             | -4.75 | 0.38 | 0.00 |
| A_51_P183051  | NM_133995 | Upb1      | 103149 | ureidopropionase, beta                                                                                         | -5.66 | 0.38 | 0.00 |
| A_52_P316824  | AK009255  | Ttll5     | 320244 | tubulin tyrosine ligase-like family, member 5                                                                  | -6.99 | 0.38 | 0.00 |
| A_51_P513991  | AK220494  | Spag4     | 245865 | sperm associated antigen 4                                                                                     | -6.48 | 0.38 | 0.00 |
| A_52_P290021  | AK002639  | Memo1     | 76890  | mediator of cell motility 1                                                                                    | -5.08 | 0.38 | 0.00 |



|              |           |           |        |                                                                                                  |       |      |      |
|--------------|-----------|-----------|--------|--------------------------------------------------------------------------------------------------|-------|------|------|
| A_51_P121652 | NM_026877 | Aspscr1   | 68938  | alveolar soft part sarcoma chromosome region,<br>candidate 1 (human)                             | -4.54 | 0.38 | 0.00 |
| A_51_P210143 | XM_917083 | Syne2     | 319565 | synaptic nuclear envelope 2                                                                      | -3.06 | 0.38 | 0.02 |
| A_52_P483974 | AK080165  | Dleu2     | 668253 | deleted in lymphocytic leukemia, 2                                                               | -4.32 | 0.38 | 0.00 |
| A_51_P111762 | NM_011804 | Creg1     | 433375 | cellular repressor of E1A-stimulated genes 1                                                     | -4.41 | 0.38 | 0.00 |
| A_51_P342652 | NM_008339 | Cd79b     | 15985  | CD79B antigen                                                                                    | -6.25 | 0.38 | 0.00 |
| A_52_P112651 | NM_025828 | Lman2     | 66890  | lectin, mannose-binding 2                                                                        | -4.58 | 0.38 | 0.00 |
| A_52_P438170 | AK084787  | Lifr      | 16880  | leukemia inhibitory factor receptor                                                              | -4.92 | 0.38 | 0.00 |
| A_52_P257812 | NM_008509 | Lpl       | 16956  | lipoprotein lipase                                                                               | -3.74 | 0.38 | 0.00 |
| A_51_P413005 | NM_023543 | Chn2      | 69993  | chimerin (chimaerin) 2                                                                           | -4.69 | 0.38 | 0.00 |
| A_51_P312846 | NM_023605 | Fbxo9     | 71538  | f-box protein 9                                                                                  | -4.11 | 0.38 | 0.00 |
| A_51_P307644 | NM_025652 | Gtf3a     | 66596  | general transcription factor III A                                                               | -4.43 | 0.38 | 0.00 |
| A_51_P502225 | NM_019687 | Slc22a4   | 30805  | solute carrier family 22 (organic cation transporter),<br>member 4                               | -5.92 | 0.38 | 0.00 |
| A_52_P506516 | NM_008010 | Fgfr3     | 14184  | fibroblast growth factor receptor 3                                                              | -7.33 | 0.38 | 0.00 |
| A_52_P381179 | NM_172773 | Slc17a5   | 235504 | solute carrier family 17 (anion/sugar transporter),<br>member 5                                  | -3.81 | 0.38 | 0.00 |
| A_52_P592516 | NM_178750 | Ss18l1    | 269397 | synovial sarcoma translocation gene on chromosome 18-<br>like 1                                  | -3.82 | 0.38 | 0.00 |
| A_52_P15495  | NM_021496 | Pvrl3     | 58998  | poliovirus receptor-related 3                                                                    | -3.87 | 0.38 | 0.00 |
| A_52_P244763 | AK078393  | Trip4     | 56404  | thyroid hormone receptor interactor 4                                                            | -6.21 | 0.38 | 0.00 |
| A_51_P466221 | NM_144547 | Amhr2     | 110542 | anti-Mullerian hormone type 2 receptor                                                           | -7.62 | 0.38 | 0.00 |
| A_51_P487244 | NM_001003 | Adamts7   | 108153 | a disintegrin-like and metallopeptidase (reprolysin type)<br>with thrombospondin type 1 motif, 7 | -4.93 | 0.38 | 0.00 |
| A_51_P109741 | AK155405  | Neil1     | 72774  | nei endonuclease VIII-like 1 (E. coli)                                                           | -5.18 | 0.37 | 0.00 |
| A_51_P413147 | NM_008693 | Klk1b3    | 18050  | kallikrein 1-related peptidase b3                                                                | -4.83 | 0.37 | 0.00 |
| A_51_P169495 | NM_008619 | Mov10     | 17454  | Moloney leukemia virus 10                                                                        | -4.80 | 0.37 | 0.00 |
| A_51_P142896 | NM_007652 | Cd59a     | 12509  | CD59a antigen                                                                                    | -5.94 | 0.37 | 0.00 |
| A_52_P274028 | AK078039  | Ssr1      | 107513 | signal sequence receptor, alpha                                                                  | -6.37 | 0.37 | 0.00 |
| A_51_P133097 | AK018420  | 8430416G1 | 71469  | RIKEN cDNA 8430416G17 gene                                                                       | -7.16 | 0.37 | 0.00 |
| A_52_P223407 | AK135623  | Mrpl35    | 66223  | mitochondrial ribosomal protein L35                                                              | -7.20 | 0.37 | 0.00 |
| A_51_P300456 | AK122223  | Pxdn      | 69675  | peroxidasin homolog (Drosophila)                                                                 | -3.63 | 0.37 | 0.00 |
| A_52_P124429 | NM_016665 | Stra13    | 20892  | stimulated by retinoic acid 13                                                                   | -7.47 | 0.37 | 0.00 |

|              |           |           |        |                                                         |       |      |      |
|--------------|-----------|-----------|--------|---------------------------------------------------------|-------|------|------|
| A_51_P320452 | NM_146241 | Trhde     | 237553 | TRH-degrading enzyme                                    | -3.09 | 0.37 | 0.02 |
| A_52_P544560 | XM_991082 | NA        | NA     | NA                                                      | -4.27 | 0.37 | 0.00 |
| A_51_P299632 | NM_027641 | Spf1      | 70997  | sperm flagellar 1                                       | -5.03 | 0.37 | 0.00 |
| A_51_P372418 | NM_026521 | Zfp706    | 68036  | zinc finger protein 706                                 | -3.34 | 0.37 | 0.01 |
| A_51_P453111 | NM_010422 | Hexb      | 15212  | hexosaminidase B                                        | -4.54 | 0.37 | 0.00 |
| A_51_P459240 | AK002661  | Gstk1     | 76263  | glutathione S-transferase kappa 1                       | -6.66 | 0.37 | 0.00 |
| A_52_P152859 | AK037803  | A1300500( | 320138 | RIKEN cDNA A130050007 gene                              | -3.88 | 0.37 | 0.00 |
|              |           |           |        | SWI/SNF related matrix associated, actin dependent      |       |      |      |
| A_51_P137168 | NM_018817 | Smarcal1  | 54380  | regulator of chromatin, subfamily a-like 1              | -5.65 | 0.37 | 0.00 |
| A_51_P379798 | NM_134469 | Fdps      | 110196 | farnesyl diphosphate synthetase                         | -3.90 | 0.37 | 0.00 |
| A_52_P232453 | NM_153591 | Nars2     | 244141 | asparaginyl-tRNA synthetase 2 (mitochondrial)(putative) | -3.51 | 0.37 | 0.01 |
| A_51_P521304 | NM_026167 | Klhl13    | 67455  | kelch-like 13 (Drosophila)                              | -5.12 | 0.37 | 0.00 |
| A_51_P204295 | NM_011220 | Pts       | 19286  | 6-pyruvoyl-tetrahydropterin synthase                    | -6.43 | 0.37 | 0.00 |
| A_51_P251245 | NM_026361 | Pkp4      | 227937 | plakophilin 4                                           | -3.76 | 0.37 | 0.00 |
| A_51_P389421 | NM_023480 | Fahd1     | 68636  | fumarylacetoacetate hydrolase domain containing 1       | -3.55 | 0.37 | 0.01 |
| A_51_P394394 | NM_027533 | Tspan2    | 70747  | tetraspanin 2                                           | -5.97 | 0.37 | 0.00 |
| A_52_P559779 | NM_007883 | Dsg2      | 13511  | desmoglein 2                                            | -7.22 | 0.37 | 0.00 |
| A_52_P49391  | AK090296  | Cyp2d22   | 56448  | cytochrome P450, family 2, subfamily d, polypeptide 22  | -3.88 | 0.37 | 0.00 |
| A_51_P477833 | NM_001033 | Klhl21    | 242785 | kelch-like 21 (Drosophila)                              | -4.09 | 0.37 | 0.00 |
| A_51_P120220 | AK087819  | Sipa1l3   | 74206  | signal-induced proliferation-associated 1 like 3        | -4.18 | 0.37 | 0.00 |
| A_51_P275989 | NM_001037 | RP23-195K | 622404 | coiled-coil domain containing 107                       | -6.38 | 0.37 | 0.00 |
| A_51_P518940 | NM_173788 | Npr2      | 230103 | natriuretic peptide receptor 2                          | -5.38 | 0.37 | 0.00 |
| A_52_P134914 | AK033990  | Slc30a9   | 109108 | solute carrier family 30 (zinc transporter), member 9   | -6.10 | 0.37 | 0.00 |
| A_51_P275123 | BC003498  | Psd3      | 234353 | pleckstrin and Sec7 domain containing 3                 | -4.56 | 0.37 | 0.00 |
| A_51_P232434 | AK162873  | Abhd1     | 57742  | abhydrolase domain containing 1                         | -2.78 | 0.37 | 0.04 |
| A_52_P517140 | NM_199306 | Wdtdc1    | 230796 | WD and tetratricopeptide repeats 1                      | -4.76 | 0.37 | 0.00 |
| A_51_P519048 | NA        | NA        | NA     | NA                                                      | -6.20 | 0.37 | 0.00 |
| A_51_P511800 | NM_025909 | Oma1      | 67013  | OMA1 homolog, zinc metallopeptidase (S. cerevisiae)     | -4.08 | 0.37 | 0.00 |

|              |           |                |        |                                                               |       |      |      |
|--------------|-----------|----------------|--------|---------------------------------------------------------------|-------|------|------|
| A_52_P582105 | NM_007996 | Fdx1           | 14148  | ferredoxin 1                                                  | -8.07 | 0.37 | 0.00 |
| A_52_P148184 | NM_028166 | 1600014C172244 |        | RIKEN cDNA 1600014C10 gene                                    | -3.67 | 0.37 | 0.00 |
| A_51_P430259 | BC061017  | 1700009P175472 |        | RIKEN cDNA 1700009P17 gene                                    | -3.59 | 0.37 | 0.01 |
| A_51_P166155 | NM_020567 | Gmnn           | 57441  | geminin                                                       | -3.85 | 0.37 | 0.00 |
| A_52_P351925 | NM_146005 | Ank3           | 11735  | ankyrin 3, epithelial                                         | -4.55 | 0.37 | 0.00 |
| A_51_P460181 | NM_013711 | Txnrd2         | 26462  | thioredoxin reductase 2                                       | -5.33 | 0.37 | 0.00 |
| A_52_P106513 | NM_028227 | Brap           | 72399  | BRCA1 associated protein                                      | -5.28 | 0.37 | 0.00 |
| A_52_P552547 | AK039760  | 1110054M068841 |        | RIKEN cDNA 1110054M08 gene                                    | -2.88 | 0.37 | 0.03 |
| A_52_P384310 | NM_177343 | Camk1d         | 227541 | calcium/calmodulin-dependent protein kinase ID                | -6.86 | 0.37 | 0.00 |
| A_52_P355813 | NM_028793 | Acbd5          | 74159  | acyl-Coenzyme A binding domain containing 5                   | -3.87 | 0.37 | 0.00 |
| A_52_P171019 | NM_008548 | Man1a          | 17155  | mannosidase 1, alpha                                          | -3.30 | 0.37 | 0.01 |
|              |           |                |        | ATP synthase, H <sup>+</sup> transporting, mitochondrial F1FO |       |      |      |
| A_51_P301289 | NM_007507 | Atp5k          | 11958  | complex, subunit e                                            | -7.80 | 0.37 | 0.00 |
| A_51_P371942 | NM_008788 | Pcolce         | 18542  | procollagen C-endopeptidase enhancer protein                  | -5.05 | 0.37 | 0.00 |
| A_51_P278893 | NM_001077 | Hdac5          | 15184  | histone deacetylase 5                                         | -5.27 | 0.37 | 0.00 |
| A_51_P390334 | NA        | NA             | NA     | NA                                                            | -3.76 | 0.37 | 0.00 |
| A_52_P392178 | AK042786  | Dgcr2          | 13356  | DiGeorge syndrome critical region gene 2                      | -5.16 | 0.37 | 0.00 |
| A_52_P168567 | NM_007678 | Cebpa          | 12606  | CCAAT/enhancer binding protein (C/EBP), alpha                 | -4.24 | 0.37 | 0.00 |
| A_52_P231847 | NM_145949 | Ido2           | 209176 | indoleamine 2,3-dioxygenase 2                                 | -7.05 | 0.37 | 0.00 |
| A_51_P365369 | NM_011261 | Reln           | 19699  | reelin                                                        | -4.41 | 0.37 | 0.00 |
| A_51_P154473 | NM_008559 | Mc1r           | 17199  | melanocortin 1 receptor                                       | -2.73 | 0.37 | 0.05 |
| A_52_P437502 | NM_025476 | Fam82b         | 66302  | family with sequence similarity 82, member B                  | -6.20 | 0.37 | 0.00 |
| A_52_P485275 | NM_001033 | Crxos1         | 546024 | Crx opposite strand transcript 1                              | -2.69 | 0.37 | 0.05 |
| A_52_P431981 | NM_008882 | Plxna2         | 18845  | plexin A2                                                     | -5.80 | 0.37 | 0.00 |
| A_52_P682745 | NM_172803 | Dock4          | 238130 | dedicator of cytokinesis 4                                    | -4.04 | 0.37 | 0.00 |
| A_51_P287198 | NM_033373 | Krt23          | 94179  | keratin 23                                                    | -4.45 | 0.37 | 0.00 |
| A_52_P548227 | NM_024177 | Mrpl38         | 60441  | mitochondrial ribosomal protein L38                           | -4.70 | 0.37 | 0.00 |
| A_52_P16571  | NM_013761 | Srr            | 27364  | serine racemase                                               | -3.14 | 0.37 | 0.01 |
| A_51_P257419 | NM_010710 | Lhx2           | 16870  | LIM homeobox protein 2                                        | -4.28 | 0.37 | 0.00 |
|              |           |                |        | SPC25, NDC80 kinetochore complex component,                   |       |      |      |
| A_51_P514700 | NM_025565 | Spc25          | 66442  | homolog ( <i>S. cerevisiae</i> )                              | -4.32 | 0.37 | 0.00 |
| A_52_P493925 | BB385819  | NA             | NA     | NA                                                            | -7.79 | 0.37 | 0.00 |
| A_51_P451186 | NM_001003 | Rab3ip         | 216363 | RAB3A interacting protein                                     | -4.25 | 0.37 | 0.00 |
| A_52_P348709 | NM_011804 | Creg1          | 433375 | cellular repressor of E1A-stimulated genes 1                  | -4.31 | 0.37 | 0.00 |

|              |           |           |        |                                                                                                                                      |       |      |      |
|--------------|-----------|-----------|--------|--------------------------------------------------------------------------------------------------------------------------------------|-------|------|------|
| A_51_P478061 | NM_207675 | Cadm1     | 54725  | cell adhesion molecule 1                                                                                                             | -7.47 | 0.37 | 0.00 |
| A_51_P321126 | NM_007988 | Fasn      | 14104  | fatty acid synthase                                                                                                                  | -3.31 | 0.37 | 0.01 |
| A_51_P137604 | NM_007995 | Fcna      | 14133  | ficolin A                                                                                                                            | -4.87 | 0.37 | 0.00 |
| A_51_P125316 | AK003718  | Hipk2     | 15258  | homeodomain interacting protein kinase 2                                                                                             | -8.04 | 0.37 | 0.00 |
| A_51_P519700 | NM_008624 | Mras      | 17532  | muscle and microspikes RAS                                                                                                           | -4.87 | 0.37 | 0.00 |
| A_51_P110381 | NM_144943 | Cd207     | 246278 | CD207 antigen                                                                                                                        | -3.70 | 0.37 | 0.00 |
| A_51_P513611 | NM_146078 | Ubr2      | 224826 | ubiquitin protein ligase E3 component n-recognin 2<br>acidic (leucine-rich) nuclear phosphoprotein 32 family,<br>member A            | -4.16 | 0.37 | 0.00 |
| A_51_P499755 | NM_009672 | Anp32a    | 11737  | DNA segment, Chr 10, ERATO Doi 322, expressed                                                                                        | -3.98 | 0.37 | 0.00 |
| A_52_P40367  | NM_026065 | D10Ertd32 | 67270  | tubulin polymerization promoting protein                                                                                             | -5.45 | 0.37 | 0.00 |
| A_51_P398260 | NM_182839 | Tppp      | 72948  | paroxysmal nonkinesiogenic dyskinesia                                                                                                | -5.97 | 0.37 | 0.00 |
| A_51_P177622 | NM_025580 | Pnkd      | 56695  | single-stranded DNA binding protein 3                                                                                                | -6.39 | 0.37 | 0.00 |
| A_52_P627863 | NM_023672 | Ssbp3     | 72475  | death associated protein kinase 1                                                                                                    | -3.98 | 0.37 | 0.00 |
| A_52_P37826  | NM_029653 | Dapk1     | 69635  | NA                                                                                                                                   | -4.36 | 0.36 | 0.00 |
| A_51_P291260 | XM_976153 | NA        | NA     | F-box and leucine-rich repeat protein 7                                                                                              | -5.27 | 0.36 | 0.00 |
| A_52_P423364 | NM_176959 | Fbxl7     | 448987 | starch binding domain 1                                                                                                              | -3.87 | 0.36 | 0.00 |
| A_52_P645855 | NM_175096 | Stbd1     | 52331  | START domain containing 8                                                                                                            | -3.00 | 0.36 | 0.02 |
| A_51_P251129 | NM_199018 | Stard8    | 236920 | ectonucleotide pyrophosphatase/phosphodiesterase 3                                                                                   | -3.95 | 0.36 | 0.00 |
| A_52_P379277 | AK132256  | Enpp3     | 209558 | myosin, heavy polypeptide 14                                                                                                         | -3.49 | 0.36 | 0.01 |
| A_51_P318580 | NM_028021 | Myh14     | 71960  | phospholipase C, beta 1                                                                                                              | -4.22 | 0.36 | 0.00 |
| A_51_P284665 | NM_019677 | Plcb1     | 18795  | cysteine and histidine rich 1                                                                                                        | -2.71 | 0.36 | 0.05 |
| A_52_P134083 | NM_180962 | Cyhr1     | 54151  | WW domain binding protein 1                                                                                                          | -5.76 | 0.36 | 0.00 |
| A_51_P160372 | NM_016757 | Wbp1      | 22377  | inositol 1,4,5-triphosphate receptor 2                                                                                               | -5.20 | 0.36 | 0.00 |
| A_51_P500056 | NM_019923 | Itpr2     | 16439  | cyclin-dependent kinase inhibitor 1C (P57)<br>phosphoribosylaminoimidazole carboxylase,<br>phosphoribosylaminoribosylaminoimidazole, | -5.63 | 0.36 | 0.00 |
| A_51_P339540 | NM_009876 | Cdkn1c    | 12577  | succinocarboxamide synthetase                                                                                                        | -6.56 | 0.36 | 0.00 |
| A_51_P142904 | NM_025939 | Paics     | 67054  | voltage-dependent anion channel 1                                                                                                    | -4.85 | 0.36 | 0.00 |
| A_51_P130459 | NM_011694 | Vdac1     | 22333  | NA                                                                                                                                   | -7.31 | 0.36 | 0.00 |
| A_52_P655508 | NA        | NA        | NA     | zinc finger protein 692                                                                                                              | -2.88 | 0.36 | 0.03 |
| A_52_P217604 | NM_182996 | Zfp692    | 103836 | cullin associated and neddylation disassociated 1                                                                                    | -3.22 | 0.36 | 0.01 |
| A_52_P161707 | XM_125901 | Cand1     | 71902  |                                                                                                                                      | -5.29 | 0.36 | 0.00 |

|              |           |           |        |                                                                               |       |      |      |
|--------------|-----------|-----------|--------|-------------------------------------------------------------------------------|-------|------|------|
| A_52_P141628 | NM_011397 | Slc23a1   | 20522  | solute carrier family 23 (nucleobase transporters), member 1                  | -3.08 | 0.36 | 0.02 |
| A_52_P253915 | NM_138651 | Cds2      | 110911 | CDP-diacylglycerol synthase (phosphatidate cytidyltransferase) 2              | -5.79 | 0.36 | 0.00 |
| A_51_P236469 | NM_025633 | Metap1    | 66559  | methionine aminopeptidase-like 1                                              | -5.92 | 0.36 | 0.00 |
| A_52_P251699 | NM_019546 | Prodh2    | 56189  | proline dehydrogenase (oxidase) 2                                             | -5.09 | 0.36 | 0.00 |
| A_51_P359586 | NM_008824 | Pfkfb1    | 18639  | 6-phosphofructo-2-kinase/fructose-2,6-biphosphatase 1                         | -3.28 | 0.36 | 0.01 |
| A_51_P397673 | NM_153565 | Pcsk9     | 100102 | proprotein convertase subtilisin/kexin type 9                                 | -4.05 | 0.36 | 0.00 |
| A_52_P663742 | AK076333  | Ganc      | 76051  | glucosidase, alpha; neutral C                                                 | -5.49 | 0.36 | 0.00 |
| A_51_P407304 | AK169346  | Aldh16a1  | 69748  | aldehyde dehydrogenase 16 family, member A1                                   | -5.97 | 0.36 | 0.00 |
| A_51_P204286 | AK033552  | 2900064A1 | 73024  | RIKEN cDNA 2900064A13 gene                                                    | -6.26 | 0.36 | 0.00 |
| A_51_P416660 | NM_172587 | Cdc14b    | 218294 | CDC14 cell division cycle 14 homolog B ( <i>S. cerevisiae</i> )               | -4.82 | 0.36 | 0.00 |
| A_52_P37593  | NM_015828 | Gne       | 50798  | glucosamine                                                                   | -4.74 | 0.36 | 0.00 |
| A_51_P126198 | NM_010019 | Dapk2     | 13143  | death-associated protein kinase 2                                             | -5.10 | 0.36 | 0.00 |
| A_51_P490198 | NM_026398 | Pop5      | 117109 | processing of precursor 5, ribonuclease P/MRP family ( <i>S. cerevisiae</i> ) | -6.39 | 0.36 | 0.00 |
| A_51_P504588 | NM_027194 | Tm2d2     | 69742  | TM2 domain containing 2                                                       | -6.58 | 0.36 | 0.00 |
| A_52_P649249 | NM_026858 | Xrcc6bp1  | 68876  | XRCC6 binding protein 1                                                       | -5.10 | 0.36 | 0.00 |
| A_51_P486150 | NM_008756 | Ocln      | 18260  | occludin                                                                      | -2.93 | 0.36 | 0.02 |
| A_52_P217474 | NM_025987 | Ndufa6    | 67130  | NADH dehydrogenase (ubiquinone) 1 alpha subcomplex, 6 (B14)                   | -6.29 | 0.36 | 0.00 |
| A_51_P412225 | NM_172443 | Tbc1d16   | 207592 | TBC1 domain family, member 16                                                 | -3.29 | 0.36 | 0.01 |
| A_51_P298023 | NM_028094 | Ugt2a3    | 72094  | UDP glucuronosyltransferase 2 family, polypeptide A3                          | -5.18 | 0.36 | 0.00 |
| A_51_P176042 | NM_013631 | Pklr      | 18770  | pyruvate kinase liver and red blood cell                                      | -5.19 | 0.36 | 0.00 |
| A_51_P424954 | AK045415  | B230114P1 | 402735 | RIKEN cDNA B230114P17 gene                                                    | -3.61 | 0.36 | 0.01 |
| A_51_P146941 | NM_145942 | Hmgcs1    | 208715 | 3-hydroxy-3-methylglutaryl-Coenzyme A synthase 1                              | -3.45 | 0.36 | 0.01 |
| A_52_P438359 | AK042464  | Dnajc19   | 67713  | DnaJ (Hsp40) homolog, subfamily C, member 19                                  | -5.49 | 0.36 | 0.00 |
| A_52_P48206  | NM_009010 | Rad23a    | 19358  | RAD23a homolog ( <i>S. cerevisiae</i> )                                       | -4.36 | 0.36 | 0.00 |
| A_52_P92121  | AK053456  | Ankrd33b  | 67434  | ankyrin repeat domain 33B                                                     | -6.52 | 0.36 | 0.00 |
| A_51_P512519 | M29009    | EG214403  | 214403 | predicted gene, EG214403                                                      | -5.23 | 0.36 | 0.00 |

|              |           |                 |        |                                                       |       |      |      |
|--------------|-----------|-----------------|--------|-------------------------------------------------------|-------|------|------|
| A_51_P445683 | NM_133732 | 4931406C070984  |        | RIKEN cDNA 4931406C07 gene                            | -6.60 | 0.36 | 0.00 |
| A_52_P403398 | AK090147  | lhh             | 16147  | Indian hedgehog                                       | -5.52 | 0.36 | 0.00 |
| A_51_P111245 | NM_172262 | Kdm1b           | 218214 | lysine (K)-specific demethylase 1B                    | -5.90 | 0.36 | 0.00 |
| A_52_P601757 | BC034056  | Dsg2            | 13511  | desmoglein 2                                          | -3.30 | 0.36 | 0.01 |
| A_51_P187346 | AK017223  | Sgms2           | 74442  | sphingomyelin synthase 2                              | -3.30 | 0.36 | 0.01 |
| A_52_P800301 | NA        | NA              | NA     | NA                                                    | -4.45 | 0.36 | 0.00 |
| A_51_P512783 | NM_025476 | Fam82b          | 66302  | family with sequence similarity 82, member B          | -7.11 | 0.36 | 0.00 |
| A_52_P884092 | AK082796  | C330020G1109343 |        | RIKEN cDNA C330020G15 gene                            | -7.80 | 0.36 | 0.00 |
| A_51_P244194 | NM_053199 | Cadm3           | 94332  | cell adhesion molecule 3                              | -8.27 | 0.36 | 0.00 |
|              |           |                 |        | solute carrier family 1 (glutamate/neutral amino acid |       |      |      |
| A_51_P371311 | NM_018861 | Slc1a4          | 55963  | transporter), member 4                                | -4.96 | 0.36 | 0.00 |
| A_52_P215152 | NM_010636 | Klf12           | 16597  | Kruppel-like factor 12                                | -8.08 | 0.36 | 0.00 |
| A_51_P468294 | NM_017462 | Polg            | 18975  | polymerase (DNA directed), gamma                      | -5.60 | 0.36 | 0.00 |
| A_51_P123895 | NM_053078 | DOH4S114        | 27528  | DNA segment, human D4S114                             | -4.15 | 0.36 | 0.00 |
| A_52_P559957 | NM_134147 | MacroD1         | 107227 | MACRO domain containing 1                             | -5.12 | 0.36 | 0.00 |
| A_52_P87229  | NA        | NA              | NA     | NA                                                    | -4.31 | 0.36 | 0.00 |
| A_52_P387564 | AK198605  | NA              | NA     | NA                                                    | -4.23 | 0.36 | 0.00 |
| A_51_P480169 | NM_053190 | S1pr5           | 94226  | sphingosine-1-phosphate receptor 5                    | -4.68 | 0.36 | 0.00 |
| A_51_P480020 | AK016444  | 4931408D177059  |        | RIKEN cDNA 4931408D14 gene                            | -3.02 | 0.36 | 0.02 |
| A_52_P185552 | NM_198305 | Klhl17          | 231003 | kelch-like 17 (Drosophila)                            | -7.21 | 0.36 | 0.00 |
| A_51_P170562 | BC025836  | Cpn2            | 71756  | carboxypeptidase N, polypeptide 2                     | -4.06 | 0.36 | 0.00 |
| A_52_P563917 | NM_144914 | Tmem184a        | 231832 | transmembrane protein 184a                            | -5.02 | 0.36 | 0.00 |
| A_51_P479408 | NM_008317 | Hyal1           | 15586  | hyaluronoglucosaminidase 1                            | -2.72 | 0.36 | 0.05 |
| A_52_P671013 | AK020497  | 9430079G277291  |        | RIKEN cDNA 9430079G20 gene                            | -4.40 | 0.36 | 0.00 |
| A_51_P419439 | NM_010321 | Gnmt            | 14711  | glycine N-methyltransferase                           | -3.39 | 0.36 | 0.01 |
| A_51_P505530 | NM_031176 | Tnxb            | 81877  | tenascin XB                                           | -4.91 | 0.36 | 0.00 |
| A_52_P670745 | NM_025374 | Glo1            | 109801 | glyoxalase 1                                          | -4.98 | 0.36 | 0.00 |
|              |           |                 |        | required for meiotic nuclear division 1 homolog (S.   |       |      |      |
| A_52_P399646 | NM_025343 | Rmnd1           | 66084  | cerevisiae)                                           | -6.05 | 0.36 | 0.00 |
| A_52_P482830 | NM_025580 | Pnkd            | 56695  | paroxysmal nonkinesinogenic dyskinesia                | -6.21 | 0.36 | 0.00 |
| A_52_P102432 | AK034104  | Dsg1c           | 211924 | desmoglein 1 gamma                                    | -4.12 | 0.36 | 0.00 |
| A_52_P631591 | BC024265  | Mast3           | 546071 | microtubule associated serine/threonine kinase 3      | -4.55 | 0.36 | 0.00 |

|               |           |         |        |                                                              |       |      |      |
|---------------|-----------|---------|--------|--------------------------------------------------------------|-------|------|------|
| A_51_P435068  | NM_025826 | Acadsb  | 66885  | acyl-Coenzyme A dehydrogenase, short/branched chain          | -3.29 | 0.36 | 0.01 |
| A_51_P108853  | NM_146106 | Lyplal1 | 226791 | lysophospholipase-like 1                                     | -4.29 | 0.36 | 0.00 |
| A_51_P369628  | NM_133949 | Ptov1   | 84113  | prostate tumor over expressed gene 1                         | -6.36 | 0.35 | 0.00 |
| A_51_P331090  | NM_134126 | lft140  | 106633 | intraflagellar transport 140 homolog (Chlamydomonas)         | -5.28 | 0.35 | 0.00 |
| A_52_P422859  | M77174    | NA      | NA     | NA                                                           | -3.75 | 0.35 | 0.00 |
| A_51_P128595  | AK085036  | Mtx3    | 382793 | metaxin 3                                                    | -7.66 | 0.35 | 0.00 |
| A_52_P78770   | NM_144807 | Chpt1   | 212862 | choline phosphotransferase 1                                 | -5.41 | 0.35 | 0.00 |
| A_52_P588483  | NM_010180 | Fbln1   | 14114  | fibulin 1                                                    | -2.83 | 0.35 | 0.04 |
| A_52_P1173329 | NA        | NA      | NA     | NA                                                           | -5.99 | 0.35 | 0.00 |
| A_51_P495641  | NM_019641 | Stmn1   | 16765  | stathmin 1                                                   | -4.28 | 0.35 | 0.00 |
| A_51_P117477  | NM_011977 | Slc27a1 | 26457  | solute carrier family 27 (fatty acid transporter), member 1  | -5.34 | 0.35 | 0.00 |
| A_51_P229925  | NM_021715 | Chst7   | 60322  | carbohydrate (N-acetylglucosamino) sulfotransferase 7        | -5.14 | 0.35 | 0.00 |
| A_52_P482124  | NM_026455 | Fam32a  | 67922  | family with sequence similarity 32, member A                 | -6.32 | 0.35 | 0.00 |
| A_52_P54561   | NM_010829 | Msh3    | 17686  | mutS homolog 3 (E. coli)                                     | -4.59 | 0.35 | 0.00 |
| A_51_P116699  | NM_025905 | Ttc23   | 67009  | tetratricopeptide repeat domain 23                           | -3.70 | 0.35 | 0.00 |
| A_52_P14506   | NA        | NA      | NA     | NA                                                           | -4.24 | 0.35 | 0.00 |
| A_52_P503071  | NM_138600 | Aldh7a1 | 110695 | aldehyde dehydrogenase family 7, member A1                   | -5.26 | 0.35 | 0.00 |
| A_52_P286360  | NM_008769 | Otc     | 18416  | ornithine transcarbamylase                                   | -5.20 | 0.35 | 0.00 |
| A_51_P432511  | NM_145743 | Lace1   | 215951 | lactation elevated 1                                         | -3.69 | 0.35 | 0.00 |
| A_51_P460869  | NM_145401 | Prkag2  | 108099 | protein kinase, AMP-activated, gamma 2 non-catalytic subunit | -4.63 | 0.35 | 0.00 |
| A_51_P211980  | NM_019492 | Rgs3    | 50780  | regulator of G-protein signaling 3                           | -4.23 | 0.35 | 0.00 |
| A_51_P321734  | NM_022884 | Bhmt2   | 64918  | betaine-homocysteine methyltransferase 2                     | -3.26 | 0.35 | 0.01 |
| A_51_P377579  | NM_026601 | Hyi     | 68180  | hydroxypyruvate isomerase homolog (E. coli)                  | -3.48 | 0.35 | 0.01 |
| A_51_P263419  | NM_013705 | Zfp30   | 22693  | zinc finger protein 30                                       | -4.34 | 0.35 | 0.00 |
| A_51_P299287  | NM_053261 | Impa2   | 114663 | inositol (myo)-1(or 4)-monophosphatase 2                     | -4.16 | 0.35 | 0.00 |
| A_51_P414762  | NM_026361 | Pkp4    | 227937 | plakophilin 4                                                | -6.21 | 0.35 | 0.00 |
| A_52_P380094  | NM_028195 | Cyth4   | 72318  | cytohesin 4                                                  | -2.85 | 0.35 | 0.03 |

|               |           |            |        |                                                                                                                     |       |      |      |
|---------------|-----------|------------|--------|---------------------------------------------------------------------------------------------------------------------|-------|------|------|
| A_51_P296549  | NM_032397 | Kcnn1      | 84036  | potassium intermediate/small conductance calcium-activated channel, subfamily N, member 1                           | -6.94 | 0.35 | 0.00 |
| A_52_P429909  | NM_026556 | Dynll2     | 68097  | dynein light chain LC8-type 2                                                                                       | -6.41 | 0.35 | 0.00 |
| A_51_P272586  | NM_027727 | Dym        | 69190  | dymeclin                                                                                                            | -4.97 | 0.35 | 0.00 |
| A_51_P261351  | NM_026246 | Mrpl49     | 18120  | mitochondrial ribosomal protein L49                                                                                 | -4.12 | 0.35 | 0.00 |
| A_52_P475080  | NM_029847 | Arsk       | 77041  | arylsulfatase K                                                                                                     | -9.10 | 0.35 | 0.00 |
| A_52_P493867  | NM_027194 | Tm2d2      | 69742  | TM2 domain containing 2                                                                                             | -8.15 | 0.35 | 0.00 |
| A_51_P185229  | NM_007553 | Bmp2       | 12156  | bone morphogenetic protein 2                                                                                        | -6.17 | 0.35 | 0.00 |
| A_52_P165824  | NM_175443 | Etnk2      | 214253 | ethanolamine kinase 2                                                                                               | -4.56 | 0.35 | 0.00 |
| A_51_P440315  | NM_145572 | Gys2       | 232493 | glycogen synthase 2                                                                                                 | -4.99 | 0.35 | 0.00 |
| A_51_P428977  | AK051235  | Onecut1    | 15379  | one cut domain, family member 1                                                                                     | -3.94 | 0.35 | 0.00 |
| A_51_P199987  | NM_021896 | Gucy1a3    | 60596  | guanylate cyclase 1, soluble, alpha 3                                                                               | -4.44 | 0.35 | 0.00 |
| A_52_P1092823 | AK133937  | Irx1       | 16371  | Iroquois related homeobox 1 (Drosophila)                                                                            | -5.62 | 0.35 | 0.00 |
| A_51_P234044  | NM_197988 | 1190005106 | 68918  | RIKEN cDNA 1190005106 gene                                                                                          | -6.27 | 0.35 | 0.00 |
| A_52_P661731  | NM_133684 | Mosc2      | 67247  | MOCO sulphurase C-terminal domain containing 2                                                                      | -7.43 | 0.35 | 0.00 |
| A_52_P481182  | NM_023377 | Stard5     | 170460 | StAR-related lipid transfer (START) domain containing 5 phenylalkylamine Ca2+ antagonist (emopamil) binding protein | -4.46 | 0.35 | 0.00 |
| A_51_P429682  | NM_007898 | Ebp        | 13595  |                                                                                                                     | -5.58 | 0.35 | 0.00 |
| A_51_P423963  | NM_031872 | Tas1r3     | 83771  | taste receptor, type 1, member 3                                                                                    | -5.43 | 0.35 | 0.00 |
| A_52_P527775  | NM_010005 | Cyp2d10    | 13101  | cytochrome P450, family 2, subfamily d, polypeptide 10                                                              | -5.86 | 0.35 | 0.00 |
| A_51_P374464  | NM_013541 | Gstp1      | 14870  | glutathione S-transferase, pi 1                                                                                     | -4.45 | 0.35 | 0.00 |
| A_52_P66130   | NM_201600 | Myo5b      | 17919  | myosin VB                                                                                                           | -4.93 | 0.35 | 0.00 |
| A_52_P409535  | NM_145356 | Zbtb7c     | 207259 | zinc finger and BTB domain containing 7C                                                                            | -4.75 | 0.35 | 0.00 |
| A_52_P358360  | AK088666  | Igh-6      | 16019  | immunoglobulin heavy chain 6 (heavy chain of IgM)                                                                   | -3.19 | 0.35 | 0.01 |
| A_52_P198435  | NM_207246 | Rasgrp3    | 240168 | RAS, guanyl releasing protein 3                                                                                     | -4.30 | 0.35 | 0.00 |
| A_52_P439001  | NA        | NA         | NA     | NA                                                                                                                  | -6.23 | 0.35 | 0.00 |
| A_52_P306845  | NM_007616 | Cav1       | 12389  | caveolin 1, caveolae protein vesicle-associated membrane protein, associated protein B and C                        | -4.35 | 0.35 | 0.00 |
| A_52_P556140  | NM_019806 | Vapb       | 56491  |                                                                                                                     | -4.02 | 0.35 | 0.00 |



|              |           |           |        |                                                                                              |       |      |      |
|--------------|-----------|-----------|--------|----------------------------------------------------------------------------------------------|-------|------|------|
| A_51_P107547 | NM_147085 | Olf571    | 259089 | olfactory receptor 571                                                                       | -6.25 | 0.35 | 0.00 |
| A_52_P148883 | NM_011213 | Ptprf     | 19268  | protein tyrosine phosphatase, receptor type, F                                               | -6.76 | 0.35 | 0.00 |
| A_52_P313523 | NM_028934 | 4930452B0 | 74430  | RIKEN cDNA 4930452B06 gene                                                                   | -5.81 | 0.35 | 0.00 |
| A_52_P427024 | NM_010700 | Ldlr      | 16835  | low density lipoprotein receptor                                                             | -4.25 | 0.35 | 0.00 |
| A_52_P528463 | NM_027122 | Mfsd3     | 69572  | major facilitator superfamily domain containing 3                                            | -4.48 | 0.35 | 0.00 |
| A_52_P93284  | NM_008506 | Mycl1     | 16918  | v-myc myelocytomatosis viral oncogene homolog 1,<br>lung carcinoma derived (avian)           | -4.80 | 0.35 | 0.00 |
| A_51_P356353 | NM_138651 | Cds2      | 110911 | CDP-diacylglycerol synthase (phosphatidate<br>cytidyltransferase) 2                          | -7.35 | 0.35 | 0.00 |
| A_52_P525107 | NM_007742 | Col1a1    | 12842  | collagen, type I, alpha 1                                                                    | -2.79 | 0.35 | 0.04 |
| A_51_P511560 | NM_001033 | Acsl3     | 74205  | acyl-CoA synthetase long-chain family member 3                                               | -4.74 | 0.35 | 0.00 |
| A_51_P500906 | NM_134249 | Timd2     | 171284 | T-cell immunoglobulin and mucin domain containing 2                                          | -3.52 | 0.35 | 0.01 |
| A_51_P181705 | AK017277  | Ptprg     | 19270  | protein tyrosine phosphatase, receptor type, G                                               | -3.96 | 0.35 | 0.00 |
| A_52_P119350 | AK076318  | 4732419C1 | 434357 | RIKEN cDNA 4732419C18 gene                                                                   | -3.51 | 0.35 | 0.01 |
| A_51_P521374 | NM_026341 | Nudt13    | 67725  | nudix (nucleoside diphosphate linked moiety X)-type<br>motif 13                              | -5.90 | 0.35 | 0.00 |
| A_51_P221132 | NM_145443 | L2hgdh    | 217666 | L-2-hydroxyglutarate dehydrogenase                                                           | -5.08 | 0.35 | 0.00 |
| A_51_P314397 | NM_024223 | Crip2     | 68337  | cysteine rich protein 2                                                                      | -3.19 | 0.35 | 0.01 |
| A_51_P365019 | NM_010295 | Gclc      | 14629  | glutamate-cysteine ligase, catalytic subunit                                                 | -3.95 | 0.35 | 0.00 |
| A_52_P246252 | NM_007812 | Cyp2a5    | 13087  | cytochrome P450, family 2, subfamily a, polypeptide 5                                        | -3.03 | 0.35 | 0.02 |
| A_51_P462385 | NM_008061 | G6pc      | 14377  | glucose-6-phosphatase, catalytic                                                             | -2.97 | 0.35 | 0.02 |
| A_51_P503654 | NM_178577 | Tmem205   | 235043 | transmembrane protein 205                                                                    | -7.42 | 0.35 | 0.00 |
| A_52_P13730  | NM_007623 | Cbx2      | 12416  | chromobox homolog 2 (Drosophila Pc class)                                                    | -5.34 | 0.35 | 0.00 |
| A_51_P204247 | NM_146148 | C8a       | 230558 | complement component 8, alpha polypeptide                                                    | -6.01 | 0.34 | 0.00 |
| A_51_P466673 | NM_146083 | Sfrs7     | 225027 | splicing factor, arginine/serine-rich 7                                                      | -4.85 | 0.34 | 0.00 |
| A_52_P308477 | NM_133727 | Kptn      | 70394  | kaptin                                                                                       | -6.25 | 0.34 | 0.00 |
| A_51_P367834 | NM_010305 | Gnai1     | 14677  | guanine nucleotide binding protein (G protein), alpha<br>inhibiting 1                        | -3.57 | 0.34 | 0.01 |
| A_51_P193536 | NM_016892 | Ccs       | 12460  | copper chaperone for superoxide dismutase<br>suppressor of defective silencing 3 homolog (S. | -6.59 | 0.34 | 0.00 |
| A_52_P579876 | NM_178622 | Suds3     | 71954  | cerevisiae)                                                                                  | -5.32 | 0.34 | 0.00 |
| A_52_P745    | NM_030721 | Acox3     | 80911  | acyl-Coenzyme A oxidase 3, pristanoyl                                                        | -3.99 | 0.34 | 0.00 |

|              |           |            |        |                                                                                      |       |      |      |
|--------------|-----------|------------|--------|--------------------------------------------------------------------------------------|-------|------|------|
| A_51_P476209 | NM_019569 | Fscn3      | 56223  | fascin homolog 3, actin-bundling protein, testicular (Strongylocentrotus purpuratus) | -5.09 | 0.34 | 0.00 |
| A_52_P276776 | NM_028717 | Als2       | 74018  | amyotrophic lateral sclerosis 2 (juvenile) homolog (human)                           | -4.47 | 0.34 | 0.00 |
| A_51_P142421 | NM_138683 | Rspo1      | 192199 | R-spondin homolog (Xenopus laevis)                                                   | -3.12 | 0.34 | 0.01 |
| A_51_P125205 | NM_007472 | Aqp1       | 11826  | aquaporin 1                                                                          | -5.97 | 0.34 | 0.00 |
| A_51_P284486 | NM_008183 | Gstm2      | 14863  | glutathione S-transferase, mu 2                                                      | -6.95 | 0.34 | 0.00 |
| A_51_P458873 | NM_019806 | Vapb       | 56491  | vesicle-associated membrane protein, associated protein B and C                      | -5.54 | 0.34 | 0.00 |
| A_52_P218955 | AK012700  | D3Ertd751c | 73852  | DNA segment, Chr 3, ERATO Doi 751, expressed                                         | -5.69 | 0.34 | 0.00 |
| A_52_P293222 | AK042378  | Ppargc1b   | 170826 | peroxisome proliferative activated receptor, gamma, coactivator 1 beta               | -7.17 | 0.34 | 0.00 |
| A_51_P466633 | NM_011391 | Slc16a7    | 20503  | solute carrier family 16 (monocarboxylic acid transporters), member 7                | -5.36 | 0.34 | 0.00 |
| A_51_P265465 | NM_134130 | Abhd3      | 106861 | abhydrolase domain containing 3                                                      | -5.44 | 0.34 | 0.00 |
| A_52_P177021 | NM_011220 | Pts        | 19286  | 6-pyruvoyl-tetrahydropterin synthase                                                 | -5.24 | 0.34 | 0.00 |
| A_52_P48569  | NM_027052 | Slc38a4    | 69354  | solute carrier family 38, member 4                                                   | -4.56 | 0.34 | 0.00 |
| A_51_P156708 | NM_011789 | Apc2       | 23805  | adenomatosis polyposis coli 2                                                        | -3.77 | 0.34 | 0.00 |
| A_52_P379256 | NM_024434 | Lap3       | 66988  | leucine aminopeptidase 3                                                             | -3.87 | 0.34 | 0.00 |
| A_52_P121342 | NM_020252 | Nrxn1      | 18189  | neurexin I                                                                           | -5.64 | 0.34 | 0.00 |
| A_52_P384855 | NM_172577 | Slc25a21   | 217593 | solute carrier family 25 (mitochondrial oxodicarboxylate carrier), member 21         | -4.83 | 0.34 | 0.00 |
| A_52_P339154 | NM_029398 | Tmem14a    | 75712  | transmembrane protein 14A                                                            | -6.33 | 0.34 | 0.00 |
| A_51_P338886 | NM_026950 | Ociad2     | 433904 | OCIA domain containing 2                                                             | -6.29 | 0.34 | 0.00 |
| A_51_P411909 | NM_178848 | Sirt5      | 68346  | sirtuin 5 (silent mating type information regulation 2 homolog) 5 (S. cerevisiae)    | -3.70 | 0.34 | 0.00 |
| A_51_P125351 | NM_026822 | Lce1b      | 68720  | late cornified envelope 1B                                                           | -7.05 | 0.34 | 0.00 |
| A_51_P191572 | NM_146709 | Olf411     | 258704 | olfactory receptor 411                                                               | -4.02 | 0.34 | 0.00 |
| A_51_P403799 | NM_021287 | Spnb3      | 20743  | spectrin beta 3                                                                      | -4.40 | 0.34 | 0.00 |
| A_51_P347206 | NM_147088 | Olf569     | 259092 | olfactory receptor 569                                                               | -6.46 | 0.34 | 0.00 |
| A_51_P454949 | NM_010359 | Gstm3      | 14864  | glutathione S-transferase, mu 3                                                      | -5.39 | 0.34 | 0.00 |
| A_51_P338600 | NM_025387 | Tmem14c    | 66154  | transmembrane protein 14C                                                            | -5.99 | 0.34 | 0.00 |
| A_51_P192751 | NM_026732 | Mrpl14     | 68463  | mitochondrial ribosomal protein L14                                                  | -5.20 | 0.34 | 0.00 |
| A_52_P61691  | NM_181858 | Cd59b      | 333883 | CD59b antigen                                                                        | -6.43 | 0.34 | 0.00 |

|              |           |                |        |                                                                              |       |      |      |
|--------------|-----------|----------------|--------|------------------------------------------------------------------------------|-------|------|------|
| A_51_P242560 | NM_026844 | 2310061C166531 |        | RIKEN cDNA 2310061C15 gene                                                   | -5.01 | 0.34 | 0.00 |
| A_52_P229783 | NM_029880 | Ptgr2          | 77219  | prostaglandin reductase 2                                                    | -4.27 | 0.34 | 0.00 |
| A_51_P134574 | AK030305  | Col4a3bp       | 68018  | collagen, type IV, alpha 3 (Goodpasture antigen) binding protein             | -3.27 | 0.34 | 0.01 |
| A_51_P261359 | NM_172692 | Gba2           | 230101 | glucosidase beta 2                                                           | -5.48 | 0.34 | 0.00 |
| A_51_P488519 | NM_025478 | Isoc1          | 66307  | isochorismatase domain containing 1                                          | -4.00 | 0.34 | 0.00 |
| A_52_P55726  | NM_011883 | Rnf13          | 24017  | ring finger protein 13                                                       | -4.68 | 0.34 | 0.00 |
| A_52_P628997 | XM_893473 | NA             | NA     | NA                                                                           | -4.20 | 0.34 | 0.00 |
| A_51_P479444 | NM_010544 | lhh            | 16147  | Indian hedgehog                                                              | -7.26 | 0.34 | 0.00 |
| A_51_P263993 | NM_008280 | Lipc           | 15450  | lipase, hepatic                                                              | -4.65 | 0.34 | 0.00 |
| A_51_P148612 | NM_009944 | Cox7a1         | 12865  | cytochrome c oxidase, subunit VIIa 1                                         | -4.71 | 0.34 | 0.00 |
| A_51_P345836 | NM_011871 | Prkra          | 23992  | protein kinase, interferon inducible double stranded RNA dependent activator | -5.19 | 0.34 | 0.00 |
| A_51_P456466 | NM_021455 | MLxipl         | 58805  | MLX interacting protein-like                                                 | -6.06 | 0.34 | 0.00 |
| A_51_P309988 | NM_147217 | Gprc5c         | 70355  | G protein-coupled receptor, family C, group 5, member C                      | -7.26 | 0.34 | 0.00 |
| A_51_P400016 | AK088732  | Kalrn          | 545156 | kalirin, RhoGEF kinase                                                       | -3.29 | 0.34 | 0.01 |
| A_52_P525249 | BC057094  | Trim65         | 338364 | tripartite motif-containing 65                                               | -6.09 | 0.34 | 0.00 |
| A_51_P140347 | NM_172830 | Slc4a9         | 240215 | solute carrier family 4, sodium bicarbonate cotransporter, member 9          | -3.41 | 0.34 | 0.01 |
| A_51_P407311 | NM_145954 | Aldh16a1       | 69748  | aldehyde dehydrogenase 16 family, member A1                                  | -8.82 | 0.34 | 0.00 |
| A_51_P145735 | NM_025421 | Acyp1          | 66204  | acylphosphatase 1, erythrocyte (common) type                                 | -3.90 | 0.34 | 0.00 |
| A_52_P98452  | AK199677  | Hadh           | 15107  | hydroxyacyl-Coenzyme A dehydrogenase                                         | -4.30 | 0.34 | 0.00 |
| A_52_P186274 | NA        | NA             | NA     | NA                                                                           | -3.79 | 0.34 | 0.00 |
| A_52_P52200  | NA        | NA             | NA     | NA                                                                           | -4.89 | 0.34 | 0.00 |
| A_51_P474496 | NM_009933 | Col6a1         | 12833  | collagen, type VI, alpha 1                                                   | -4.81 | 0.34 | 0.00 |
| A_52_P551011 | NM_001033 | NA             | NA     | NA                                                                           | -6.02 | 0.34 | 0.00 |
| A_52_P48681  | NM_016674 | Cldn1          | 12737  | claudin 1                                                                    | -2.79 | 0.34 | 0.04 |
| A_52_P550325 | NM_010604 | Kcnj16         | 16517  | potassium inwardly-rectifying channel, subfamily J, member 16                | -4.41 | 0.34 | 0.00 |
| A_51_P507880 | NM_028980 | Ppp4r4         | 74521  | protein phosphatase 4, regulatory subunit 4                                  | -3.47 | 0.34 | 0.01 |
| A_51_P149373 | NM_028149 | Fbxl20         | 72194  | F-box and leucine-rich repeat protein 20                                     | -5.73 | 0.34 | 0.00 |
| A_52_P359502 | AK009645  | Pdxk           | 216134 | pyridoxal (pyridoxine, vitamin B6) kinase                                    | -5.64 | 0.34 | 0.00 |
| A_52_P542013 | BC057368  | Dock6          | 319899 | dedicator of cytokinesis 6                                                   | -7.02 | 0.34 | 0.00 |

|              |           |           |        |                                                                                                                                        |       |      |      |
|--------------|-----------|-----------|--------|----------------------------------------------------------------------------------------------------------------------------------------|-------|------|------|
| A_52_P350750 | NM_015730 | Chrna4    | 11438  | cholinergic receptor, nicotinic, alpha polypeptide 4                                                                                   | -3.79 | 0.34 | 0.00 |
| A_51_P371745 | NM_134248 | Havcr1    | 171283 | hepatitis A virus cellular receptor 1                                                                                                  | -4.10 | 0.34 | 0.00 |
| A_51_P159402 | NM_013847 | Gcat      | 26912  | glycine C-acetyltransferase (2-amino-3-ketobutyrate-coenzyme A ligase)<br>armadillo repeat gene deleted in velo-cardio-facial syndrome | -6.75 | 0.34 | 0.00 |
| A_52_P583031 | NM_033474 | Arvcf     | 11877  | syndrome                                                                                                                               | -4.01 | 0.34 | 0.00 |
| A_52_P485971 | NM_001001 | Scap      | 235623 | SREBF chaperone                                                                                                                        | -6.03 | 0.34 | 0.00 |
| A_51_P392303 | NM_010733 | Lrrn3     | 16981  | leucine rich repeat protein 3, neuronal                                                                                                | -5.48 | 0.34 | 0.00 |
| A_51_P125385 | NM_031248 | Robld3    | 83409  | roadblock domain containing 3                                                                                                          | -6.59 | 0.33 | 0.00 |
| A_52_P245962 | NM_021456 | Ces1      | 12623  | carboxylesterase 1                                                                                                                     | -3.43 | 0.33 | 0.01 |
| A_51_P395555 | NM_178600 | Vkorc1    | 27973  | vitamin K epoxide reductase complex, subunit 1                                                                                         | -5.91 | 0.33 | 0.00 |
| A_51_P437144 | NM_026556 | Dynll2    | 68097  | dynein light chain LC8-type 2                                                                                                          | -5.89 | 0.33 | 0.00 |
| A_51_P436469 | NM_144821 | AI317395  | 215929 | expressed sequence AI317395                                                                                                            | -6.37 | 0.33 | 0.00 |
| A_52_P179925 | NM_026180 | Abcg8     | 67470  | ATP-binding cassette, sub-family G (WHITE), member 8                                                                                   | -6.24 | 0.33 | 0.00 |
| A_51_P111192 | NM_010005 | Cyp2d10   | 13101  | cytochrome P450, family 2, subfamily d, polypeptide 10                                                                                 | -6.05 | 0.33 | 0.00 |
| A_52_P645862 | NM_177322 | Agtr1a    | 11607  | angiotensin II receptor, type 1a                                                                                                       | -6.07 | 0.33 | 0.00 |
| A_51_P483261 | NM_145145 | Pomt1     | 99011  | protein-O-mannosyltransferase 1                                                                                                        | -4.13 | 0.33 | 0.00 |
| A_51_P484526 | NM_011915 | Wif1      | 24117  | Wnt inhibitory factor 1                                                                                                                | -5.28 | 0.33 | 0.00 |
| A_52_P260659 | NM_001039 | Kcnj10    | 16513  | potassium inwardly-rectifying channel, subfamily J, member 10                                                                          | -6.90 | 0.33 | 0.00 |
| A_51_P303906 | NM_146243 | Actr2     | 66713  | ARP2 actin-related protein 2 homolog (yeast)                                                                                           | -5.10 | 0.33 | 0.00 |
| A_51_P418469 | NM_023595 | Dut       | 110074 | deoxyuridine triphosphatase                                                                                                            | -7.65 | 0.33 | 0.00 |
| A_52_P111830 | NM_029956 | Mmab      | 77697  | methylmalonic aciduria (cobalamin deficiency) type B homolog (human)                                                                   | -3.85 | 0.33 | 0.00 |
| A_52_P319927 | XM_140800 | NA        | NA     | NA                                                                                                                                     | -5.13 | 0.33 | 0.00 |
| A_52_P561416 | NM_176952 | 6430573F1 | 319582 | RIKEN cDNA 6430573F11 gene                                                                                                             | -4.91 | 0.33 | 0.00 |
| A_51_P166099 | NM_019957 | Dnase2b   | 56629  | deoxyribonuclease II beta                                                                                                              | -4.84 | 0.33 | 0.00 |
| A_51_P152578 | XM_131566 | NA        | NA     | NA                                                                                                                                     | -7.08 | 0.33 | 0.00 |
| A_52_P683136 | NM_030026 | Mccc2     | 78038  | methylcrotonoyl-Coenzyme A carboxylase 2 (beta)                                                                                        | -3.94 | 0.33 | 0.00 |
| A_51_P216015 | AK084358  | Dleu2     | 668253 | deleted in lymphocytic leukemia, 2                                                                                                     | -5.13 | 0.33 | 0.00 |

|              |           |                 |        |                                                       |        |      |      |
|--------------|-----------|-----------------|--------|-------------------------------------------------------|--------|------|------|
| A_52_P119830 | NM_177186 | A530082C1320541 |        | RIKEN cDNA A530082C11 gene                            | -4.64  | 0.33 | 0.00 |
| A_51_P133105 | AK018420  | 8430416G171469  |        | RIKEN cDNA 8430416G17 gene                            | -7.28  | 0.33 | 0.00 |
| A_52_P264905 | NM_026908 | Cab39l          | 69008  | calcium binding protein 39-like                       | -6.84  | 0.33 | 0.00 |
| A_51_P248122 | NM_133234 | Bbc3            | 170770 | BCL2 binding component 3                              | -6.53  | 0.33 | 0.00 |
| A_51_P434776 | NM_028101 | Jmjd8           | 72106  | jumonji domain containing 8                           | -6.93  | 0.33 | 0.00 |
|              |           |                 |        | eukaryotic translation initiation factor 4E binding   |        |      |      |
| A_51_P135654 | NM_010124 | Eif4ebp2        | 13688  | protein 2                                             | -3.87  | 0.33 | 0.00 |
| A_51_P469951 | NM_153070 | NA              | NA     | NA                                                    | -3.97  | 0.33 | 0.00 |
| A_51_P174081 | NM_146073 | Zdhhc14         | 224454 | zinc finger, DHHC domain containing 14                | -6.75  | 0.33 | 0.00 |
| A_51_P395111 | NM_019730 | Nme3            | 79059  | non-metastatic cells 3, protein expressed in          | -5.18  | 0.33 | 0.00 |
| A_52_P298986 | NM_001039 | Lin7a           | 108030 | lin-7 homolog A (C. elegans)                          | -10.21 | 0.33 | 0.00 |
|              |           |                 |        | formation of mitochondrial complexes 1 homolog (S.    |        |      |      |
| A_51_P406077 | NM_025363 | Fmc1            | 66117  | cerevisiae)                                           | -7.97  | 0.33 | 0.00 |
| A_52_P669425 | NA        | NA              | NA     | NA                                                    | -5.50  | 0.33 | 0.00 |
| A_51_P492410 | NM_026784 | Pmvk            | 68603  | phosphomevalonate kinase                              | -3.66  | 0.33 | 0.00 |
| A_51_P182303 | NM_007743 | Col1a2          | 12843  | collagen, type I, alpha 2                             | -4.67  | 0.33 | 0.00 |
| A_52_P661722 | NM_133684 | Mosc2           | 67247  | MOCO sulphurase C-terminal domain containing 2        | -8.69  | 0.33 | 0.00 |
| A_52_P565549 | NM_173788 | Npr2            | 230103 | natriuretic peptide receptor 2                        | -5.95  | 0.33 | 0.00 |
| A_51_P114634 | NM_173405 | Amz1            | 231842 | archaelysin family metallopeptidase 1                 | -10.69 | 0.33 | 0.00 |
| A_52_P329164 | AK087910  | D130020L0319760 |        | RIKEN cDNA D130020L05 gene                            | -4.24  | 0.33 | 0.00 |
| A_51_P454696 | BC028441  | Mosc1           | 66112  | MOCO sulphurase C-terminal domain containing 1        | -3.79  | 0.33 | 0.00 |
| A_52_P213696 | NM_027402 | Fndc5           | 384061 | fibronectin type III domain containing 5              | -6.56  | 0.33 | 0.00 |
| A_51_P215077 | NM_025569 | Mgst3           | 66447  | microsomal glutathione S-transferase 3                | -6.09  | 0.33 | 0.00 |
| A_52_P222981 | AK033485  | Pgap1           | 241062 | post-GPI attachment to proteins 1                     | -6.12  | 0.33 | 0.00 |
| A_52_P198239 | NM_001033 | Ube2u           | 381534 | ubiquitin-conjugating enzyme E2U (putative)           | -4.49  | 0.33 | 0.00 |
|              |           |                 |        | coatamer protein complex, subunit gamma 2, antisense  |        |      |      |
| A_52_P383754 | AF217545  | Copg2as2        | 1E+08  | 2                                                     | -4.63  | 0.33 | 0.00 |
| A_52_P178651 | NA        | NA              | NA     | NA                                                    | -5.86  | 0.33 | 0.00 |
| A_52_P302345 | NM_133969 | Cyp4v3          | 102294 | cytochrome P450, family 4, subfamily v, polypeptide 3 | -3.31  | 0.33 | 0.01 |
| A_52_P671916 | NM_172783 | Phka2           | 110094 | phosphorylase kinase alpha 2                          | -5.51  | 0.33 | 0.00 |
| A_52_P683728 | NM_175029 | Atg4c           | 242557 | autophagy-related 4C (yeast)                          | -3.53  | 0.33 | 0.01 |

|               |           |           |        |                                                            |       |      |      |
|---------------|-----------|-----------|--------|------------------------------------------------------------|-------|------|------|
| A_52_P567531  | BC055360  | Cntn1     | 12805  | contactin 1                                                | -4.87 | 0.33 | 0.00 |
| A_51_P342206  | NM_010002 | Cyp2c38   | 13097  | cytochrome P450, family 2, subfamily c, polypeptide 38     | -3.09 | 0.33 | 0.02 |
| A_52_P415215  | NM_010358 | Gstm1     | 14862  | glutathione S-transferase, mu 1                            | -4.04 | 0.33 | 0.00 |
| A_51_P229602  | NM_008882 | Plxna2    | 18845  | plexin A2                                                  | -6.26 | 0.33 | 0.00 |
| A_51_P262228  | NM_145466 | A2ld1     | 223267 | AlG2-like domain 1                                         | -6.37 | 0.33 | 0.00 |
| A_51_P354609  | NM_145152 | Lrrc3     | 237387 | leucine rich repeat containing 3                           | -4.70 | 0.33 | 0.00 |
| A_51_P400543  | NM_019467 | Aif1      | 11629  | allograft inflammatory factor 1                            | -4.08 | 0.33 | 0.00 |
| A_51_P157406  | NM_008963 | Ptgds     | 19215  | prostaglandin D2 synthase (brain)                          | -4.25 | 0.33 | 0.00 |
| A_51_P214087  | NM_007678 | Cebpa     | 12606  | CCAAT/enhancer binding protein (C/EBP), alpha              | -4.67 | 0.33 | 0.00 |
| A_52_P134141  | NM_025574 | Pigy      | 66459  | phosphatidylinositol glycan anchor biosynthesis, class Y   | -5.60 | 0.33 | 0.00 |
| A_51_P517672  | NM_178779 | Rnf152    | 320311 | ring finger protein 152                                    | -6.24 | 0.32 | 0.00 |
| A_51_P304681  | AF134983  | Clpx      | 270166 | caseinolytic peptidase X (E.coli)                          | -3.81 | 0.32 | 0.00 |
| A_51_P223132  | XM_486227 | NA        | NA     | NA                                                         | -4.19 | 0.32 | 0.00 |
| A_51_P242043  | NM_053272 | Dhcr24    | 74754  | 24-dehydrocholesterol reductase                            | -4.55 | 0.32 | 0.00 |
| A_52_P391718  | NM_009079 | Rpl22     | 19934  | ribosomal protein L22                                      | -5.75 | 0.32 | 0.00 |
| A_52_P113350  | NM_212433 | Fbxo3     | 57443  | F-box protein 3                                            | -8.25 | 0.32 | 0.00 |
| A_51_P320089  | NM_008129 | Gclm      | 14630  | glutamate-cysteine ligase, modifier subunit                | -4.54 | 0.32 | 0.00 |
| A_52_P384574  | NM_133774 | Stard4    | 170459 | StAR-related lipid transfer (START) domain containing 4    | -3.54 | 0.32 | 0.01 |
| A_52_P1075623 | AK037052  | NA        | NA     | NA                                                         | -6.68 | 0.32 | 0.00 |
| A_51_P403536  | NM_175641 | Ltbp4     | 108075 | latent transforming growth factor beta binding protein 4   | -6.03 | 0.32 | 0.00 |
| A_51_P118320  | NM_138601 | D10Jhu81e | 28295  | DNA segment, Chr 10, Johns Hopkins University 81 expressed | -6.56 | 0.32 | 0.00 |
| A_51_P272023  | NM_025786 | Rnf186    | 66825  | ring finger protein 186                                    | -4.76 | 0.32 | 0.00 |
| A_51_P332917  | BC005527  | Enpp3     | 209558 | ectonucleotide pyrophosphatase/phosphodiesterase 3         | -4.14 | 0.32 | 0.00 |
| A_52_P487362  | NM_028980 | Ppp4r4    | 74521  | protein phosphatase 4, regulatory subunit 4                | -6.78 | 0.32 | 0.00 |
| A_51_P262773  | NM_007664 | Cdh2      | 12558  | cadherin 2                                                 | -5.07 | 0.32 | 0.00 |
| A_52_P488427  | NM_144520 | Sec14l2   | 67815  | SEC14-like 2 (S. cerevisiae)                               | -3.47 | 0.32 | 0.01 |
| A_51_P491329  | NM_026018 | Pdzk1ip1  | 67182  | PDZK1 interacting protein 1                                | -8.21 | 0.32 | 0.00 |

|              |           |           |        |                                                                              |       |      |      |
|--------------|-----------|-----------|--------|------------------------------------------------------------------------------|-------|------|------|
| A_51_P209782 | NM_001001 | Cyp2c44   | 226143 | cytochrome P450, family 2, subfamily c, polypeptide 44                       | -4.70 | 0.32 | 0.00 |
| A_51_P268331 | NM_023270 | Rnf128    | 66889  | ring finger protein 128                                                      | -4.57 | 0.32 | 0.00 |
| A_51_P396917 | NM_026752 | Zfyve21   | 68520  | zinc finger, FYVE domain containing 21                                       | -6.50 | 0.32 | 0.00 |
| A_51_P294891 | NM_133249 | Ppargc1b  | 170826 | peroxisome proliferative activated receptor, gamma, coactivator 1 beta       | -5.57 | 0.32 | 0.00 |
| A_51_P519008 | NM_177595 | Mkx       | 210719 | mohawk homeobox                                                              | -4.89 | 0.32 | 0.00 |
| A_52_P622355 | AK008145  | Igl-V1    | 16142  | immunoglobulin lambda chain, variable 1                                      | -5.62 | 0.32 | 0.00 |
| A_52_P156452 | NM_007717 | Cmah      | 12763  | cytidine monophospho-N-acetylneuraminic acid hydroxylase                     | -5.39 | 0.32 | 0.00 |
| A_52_P598634 | AK045413  | 119000710 | 544717 | RIKEN cDNA 1190007107 gene                                                   | -6.16 | 0.32 | 0.00 |
| A_51_P278550 | NM_134118 | Tecr      | 106529 | trans-2,3-enoyl-CoA reductase                                                | -6.72 | 0.32 | 0.00 |
| A_51_P451588 | NM_013746 | Plekhb1   | 27276  | pleckstrin homology domain containing, family B (evectins) member 1          | -5.61 | 0.32 | 0.00 |
| A_52_P374314 | NA        | NA        | NA     | NA                                                                           | -6.79 | 0.32 | 0.00 |
| A_52_P456898 | NM_030717 | Lactb     | 80907  | lactamase, beta                                                              | -3.89 | 0.32 | 0.00 |
| A_52_P487599 | NM_178413 | Thnsl2    | 232078 | threonine synthase-like 2 (bacterial)                                        | -8.28 | 0.32 | 0.00 |
| A_52_P140881 | NM_177615 | Slc26a10  | 216441 | solute carrier family 26, member 10                                          | -6.02 | 0.32 | 0.00 |
| A_51_P430973 | NM_027995 | Paqr7     | 71904  | progesterin and adipoQ receptor family member VII                            | -3.43 | 0.32 | 0.01 |
| A_51_P178735 | NM_146108 | Hibch     | 227095 | 3-hydroxyisobutyryl-Coenzyme A hydrolase                                     | -4.40 | 0.32 | 0.00 |
| A_52_P644690 | AK041146  | NA        | NA     | NA                                                                           | -5.39 | 0.32 | 0.00 |
| A_51_P175581 | NM_183028 | Pcmt1     | 319263 | protein-L-isoaspartate (D-aspartate) O-methyltransferase domain containing 1 | -6.45 | 0.32 | 0.00 |
| A_52_P18775  | NM_175471 | Cyb5rl    | 230582 | cytochrome b5 reductase-like                                                 | -5.11 | 0.32 | 0.00 |
| A_52_P302012 | NM_026844 | 2310061C1 | 66531  | RIKEN cDNA 2310061C15 gene                                                   | -4.96 | 0.32 | 0.00 |
| A_52_P544410 | BC010667  | Ap3m1     | 55946  | adaptor-related protein complex 3, mu 1 subunit                              | -4.15 | 0.32 | 0.00 |
| A_51_P450191 | NM_026639 | Art4      | 109978 | ADP-ribosyltransferase 4                                                     | -6.97 | 0.32 | 0.00 |
| A_52_P78514  | AK054415  | Pik3c2g   | 18705  | phosphatidylinositol 3-kinase, C2 domain containing, gamma polypeptide       | -8.23 | 0.32 | 0.00 |
| A_51_P335000 | NM_001077 | Fhl1      | 14199  | four and a half LIM domains 1                                                | -3.62 | 0.32 | 0.00 |
| A_51_P138060 | NM_011883 | Rnf13     | 24017  | ring finger protein 13                                                       | -6.83 | 0.32 | 0.00 |
| A_51_P112817 | NM_024264 | Cyp27a1   | 104086 | cytochrome P450, family 27, subfamily a, polypeptide 1                       | -5.53 | 0.32 | 0.00 |

|              |           |           |        |                                                       |        |      |      |
|--------------|-----------|-----------|--------|-------------------------------------------------------|--------|------|------|
| A_51_P206824 | NM_027126 | Hfe2      | 69585  | hemochromatosis type 2 (juvenile) (human homolog)     | -3.87  | 0.32 | 0.00 |
| A_51_P181312 | NM_026428 | Dcxr      | 67880  | dicarbonyl L-xylulose reductase                       | -7.65  | 0.32 | 0.00 |
| A_51_P231042 | NM_053094 | Cd163     | 93671  | CD163 antigen                                         | -3.32  | 0.32 | 0.01 |
|              |           |           |        | DNA segment, Chr 10, Johns Hopkins University 81      |        |      |      |
| A_52_P498167 | NM_138601 | D10Jhu81e | 28295  | expressed                                             | -8.47  | 0.32 | 0.00 |
| A_52_P441634 | NM_177960 | Idi1      | 319554 | isopentenyl-diphosphate delta isomerase               | -3.86  | 0.32 | 0.00 |
| A_52_P176573 | NM_011983 | Homer2    | 26557  | homer homolog 2 (Drosophila)                          | -5.58  | 0.32 | 0.00 |
| A_52_P637360 | NA        | NA        | NA     | NA                                                    | -3.25  | 0.32 | 0.01 |
| A_52_P506984 | BC015294  | Glyat     | 107146 | glycine-N-acyltransferase                             | -3.63  | 0.32 | 0.00 |
| A_51_P487175 | NM_212441 | Acsm3     | 20216  | acyl-CoA synthetase medium-chain family member 3      | -3.38  | 0.32 | 0.01 |
| A_51_P102789 | NM_007574 | C1qc      | 12262  | complement component 1, q subcomponent, C chain       | -4.17  | 0.32 | 0.00 |
| A_52_P566665 | NM_025809 | Clec14a   | 66864  | C-type lectin domain family 14, member a              | -5.36  | 0.32 | 0.00 |
| A_51_P498640 | NM_172134 | Pdxk      | 216134 | pyridoxal (pyridoxine, vitamin B6) kinase             | -4.41  | 0.32 | 0.00 |
| A_52_P657825 | AK035670  | Sypl      | 19027  | synaptophysin-like protein                            | -4.44  | 0.32 | 0.00 |
| A_52_P293682 | XM_914209 | NA        | NA     | NA                                                    | -5.35  | 0.32 | 0.00 |
| A_51_P369784 | NM_133660 | Es22      | 13897  | esterase 22                                           | -4.26  | 0.32 | 0.00 |
|              |           |           |        | amyotrophic lateral sclerosis 2 (juvenile) homolog    |        |      |      |
| A_52_P311297 | NM_028717 | Als2      | 74018  | (human)                                               | -5.05  | 0.31 | 0.00 |
| A_51_P451458 | NM_174857 | Mamdc2    | 71738  | MAM domain containing 2                               | -5.04  | 0.31 | 0.00 |
| A_52_P421698 | NM_027816 | Cyp2u1    | 71519  | cytochrome P450, family 2, subfamily u, polypeptide 1 | -4.97  | 0.31 | 0.00 |
| A_52_P120022 | NM_197945 | RP23-100C | 241638 | ProSAPiP1 protein                                     | -6.67  | 0.31 | 0.00 |
| A_51_P291135 | NM_007996 | Fdx1      | 14148  | ferredoxin 1                                          | -8.72  | 0.31 | 0.00 |
|              |           |           |        | EGF, latrophilin seven transmembrane domain           |        |      |      |
| A_51_P480328 | NM_133222 | Elt1      | 170757 | containing 1                                          | -5.79  | 0.31 | 0.00 |
| A_52_P354183 | NM_027436 | Mipep     | 70478  | mitochondrial intermediate peptidase                  | -10.42 | 0.31 | 0.00 |
| A_52_P442691 | NM_023644 | Mccc1     | 72039  | methylcrotonoyl-Coenzyme A carboxylase 1 (alpha)      | -5.48  | 0.31 | 0.00 |
| A_52_P94401  | NM_177708 | Rtn4rl1   | 237847 | reticulon 4 receptor-like 1                           | -3.19  | 0.31 | 0.01 |
| A_51_P355629 | NM_008087 | Gas2      | 14453  | growth arrest specific 2                              | -3.65  | 0.31 | 0.00 |



|              |           |           |        |                                                                                                              |       |      |      |
|--------------|-----------|-----------|--------|--------------------------------------------------------------------------------------------------------------|-------|------|------|
| A_52_P504361 | NM_013792 | Naglu     | 27419  | alpha-N-acetylglucosaminidase (Sanfilippo disease IIIB)                                                      | -5.96 | 0.31 | 0.00 |
| A_51_P336827 | NM_025558 | Cyb5b     | 66427  | cytochrome b5 type B                                                                                         | -5.41 | 0.31 | 0.00 |
| A_51_P265093 | AK144671  | Aasdhppt  | 67618  | aminoadipate-semialdehyde dehydrogenase-phosphopantetheinyl transferase                                      | -7.68 | 0.31 | 0.00 |
| A_52_P223194 | NM_008830 | Abcb4     | 18670  | ATP-binding cassette, sub-family B (MDR/TAP), member 4                                                       | -3.48 | 0.31 | 0.01 |
| A_51_P381683 | NM_007377 | Aatk      | 11302  | apoptosis-associated tyrosine kinase                                                                         | -5.02 | 0.31 | 0.00 |
| A_51_P213030 | NM_134147 | MacroD1   | 107227 | MACRO domain containing 1                                                                                    | -5.55 | 0.31 | 0.00 |
| A_51_P377856 | NM_133994 | Gstt3     | 103140 | glutathione S-transferase, theta 3                                                                           | -4.87 | 0.31 | 0.00 |
| A_51_P224263 | NM_134052 | Adi1      | 104923 | acireductone dioxygenase 1                                                                                   | -3.74 | 0.31 | 0.00 |
| A_51_P492408 | NM_026784 | Pmvk      | 68603  | phosphomevalonate kinase                                                                                     | -5.13 | 0.31 | 0.00 |
| A_51_P247928 | AB059646  | Clmn      | 94040  | calmin                                                                                                       | -6.37 | 0.31 | 0.00 |
| A_51_P126476 | NM_010863 | Myo1b     | 17912  | myosin IB                                                                                                    | -5.23 | 0.31 | 0.00 |
| A_51_P275623 | NM_015828 | Gne       | 50798  | glucosamine                                                                                                  | -5.85 | 0.31 | 0.00 |
| A_51_P295085 | NM_008760 | Ogn       | 18295  | osteoglycin                                                                                                  | -4.13 | 0.31 | 0.00 |
| A_51_P293938 | NM_026878 | Rasl11b   | 68939  | RAS-like, family 11, member B                                                                                | -5.68 | 0.31 | 0.00 |
| A_51_P383741 | NM_007554 | Bmp4      | 12159  | bone morphogenetic protein 4                                                                                 | -7.35 | 0.31 | 0.00 |
| A_51_P167527 | NM_008524 | Lum       | 17022  | lumican                                                                                                      | -4.36 | 0.31 | 0.00 |
| A_51_P378545 | NM_028030 | Rbpms2    | 71973  | RNA binding protein with multiple splicing 2                                                                 | -7.66 | 0.31 | 0.00 |
| A_51_P475138 | XM_130483 | Duox1     | 99439  | dual oxidase 1                                                                                               | -5.13 | 0.31 | 0.00 |
| A_51_P304757 | NM_020590 | Gabarapl1 | 57436  | gamma-aminobutyric acid (GABA) A receptor-associated protein-like 1                                          | -6.26 | 0.31 | 0.00 |
| A_51_P339232 | NM_009228 | Snta1     | 20648  | syntrophin, acidic 1                                                                                         | -5.17 | 0.31 | 0.00 |
| A_51_P364609 | NM_019699 | Fads2     | 56473  | fatty acid desaturase 2                                                                                      | -7.76 | 0.31 | 0.00 |
| A_51_P270364 | NM_133823 | Mmaa      | 109136 | methylmalonic aciduria (cobalamin deficiency) type A                                                         | -5.88 | 0.31 | 0.00 |
| A_51_P139320 | NM_025273 | Pcbd1     | 13180  | pterin 4 alpha carbinolamine dehydratase/dimerization cofactor of hepatocyte nuclear factor 1 alpha (TCF1) 1 | -4.28 | 0.31 | 0.00 |
| A_51_P326529 | NM_181277 | Col14a1   | 12818  | collagen, type XIV, alpha 1                                                                                  | -4.54 | 0.31 | 0.00 |
| A_51_P335051 | NM_016668 | Bhmt      | 12116  | betaine-homocysteine methyltransferase                                                                       | -3.42 | 0.31 | 0.01 |
| A_51_P431470 | NM_026178 | Mmd       | 67468  | monocyte to macrophage differentiation-associated                                                            | -3.98 | 0.31 | 0.00 |

|              |           |            |        |                                                                                                |       |      |      |
|--------------|-----------|------------|--------|------------------------------------------------------------------------------------------------|-------|------|------|
| A_51_P311434 | NM_025797 | Cyb5       | 109672 | cytochrome b-5                                                                                 | -5.54 | 0.31 | 0.00 |
| A_52_P321342 | NM_028785 | Dock8      | 76088  | dedicator of cytokinesis 8                                                                     | -8.54 | 0.31 | 0.00 |
| A_51_P368591 | NM_053254 | Tle6       | 114606 | transducin-like enhancer of split 6, homolog of Drosophila E(spl)                              | -6.03 | 0.31 | 0.00 |
| A_51_P380824 | NM_146891 | Olf1r1225  | 258893 | olfactory receptor 1225                                                                        | -4.79 | 0.31 | 0.00 |
| A_51_P455647 | NM_009801 | Car2       | 12349  | carbonic anhydrase 2                                                                           | -5.66 | 0.31 | 0.00 |
| A_52_P416072 | NM_010145 | Ephx1      | 13849  | epoxide hydrolase 1, microsomal                                                                | -5.25 | 0.31 | 0.00 |
| A_52_P125354 | NM_019488 | Slc2a8     | 56017  | solute carrier family 2, (facilitated glucose transporter), member 8                           | -7.80 | 0.31 | 0.00 |
| A_51_P103706 | NM_007815 | Cyp2c29    | 13095  | cytochrome P450, family 2, subfamily c, polypeptide 29                                         | -4.29 | 0.31 | 0.00 |
| A_51_P376789 | NM_145387 | Ath11      | 212974 | ATH1, acid trehalase-like 1 (yeast)                                                            | -4.14 | 0.31 | 0.00 |
| A_51_P185639 | NM_011213 | Ptprf      | 19268  | protein tyrosine phosphatase, receptor type, F                                                 | -8.24 | 0.31 | 0.00 |
| A_51_P513460 | NM_015780 | Cfhr1      | 50702  | complement factor H-related 1                                                                  | -8.80 | 0.31 | 0.00 |
| A_51_P335849 | NM_023465 | Ctnnbip1   | 67087  | catenin beta interacting protein 1                                                             | -6.71 | 0.31 | 0.00 |
| A_51_P400463 | XM_980293 | NA         | NA     | NA                                                                                             | -7.62 | 0.31 | 0.00 |
| A_51_P356355 | AK017654  | Cds2       | 110911 | CDP-diacylglycerol synthase (phosphatidate cytidyltransferase) 2                               | -6.48 | 0.31 | 0.00 |
| A_51_P243323 | AK046666  | 1110020G09 | 68646  | RIKEN cDNA 1110020G09 gene                                                                     | -5.73 | 0.30 | 0.00 |
| A_51_P435339 | NM_010149 | Epor       | 13857  | erythropoietin receptor                                                                        | -8.41 | 0.30 | 0.00 |
| A_52_P262511 | NM_021472 | Rnase4     | 58809  | ribonuclease, RNase A family 4                                                                 | -3.61 | 0.30 | 0.00 |
| A_51_P446825 | NM_176952 | 6430573F1  | 319582 | RIKEN cDNA 6430573F11 gene                                                                     | -4.30 | 0.30 | 0.00 |
| A_51_P150763 | NM_145852 | Ropn1l     | 252967 | ropporin 1-like                                                                                | -5.67 | 0.30 | 0.00 |
| A_51_P326942 | NM_010941 | Nsdhl      | 18194  | NAD(P) dependent steroid dehydrogenase-like hydroxy-delta-5-steroid dehydrogenase, 3 beta- and | -3.50 | 0.30 | 0.01 |
| A_51_P435911 | NM_133943 | Hsd3b7     | 101502 | steroid delta-isomerase 7                                                                      | -5.74 | 0.30 | 0.00 |
| A_51_P204582 | NM_019403 | Rnf5       | 54197  | ring finger protein 5                                                                          | -5.93 | 0.30 | 0.00 |
| A_52_P415996 | NM_008184 | Gstm6      | 14867  | glutathione S-transferase, mu 6                                                                | -5.75 | 0.30 | 0.00 |
| A_51_P378777 | NM_029090 | Nat15      | 74763  | N-acetyltransferase 15 (GCN5-related, putative)                                                | -5.55 | 0.30 | 0.00 |
| A_51_P293901 | NM_026819 | Dhrs1      | 52585  | dehydrogenase/reductase (SDR family) member 1                                                  | -6.22 | 0.30 | 0.00 |
| A_51_P240857 | NM_144807 | Chpt1      | 212862 | choline phosphotransferase 1                                                                   | -5.87 | 0.30 | 0.00 |
| A_51_P291129 | NM_007996 | Fdx1       | 14148  | ferredoxin 1                                                                                   | -6.98 | 0.30 | 0.00 |
| A_51_P286131 | NM_030021 | D730039F1  | 177996 | RIKEN cDNA D730039F16 gene                                                                     | -3.85 | 0.30 | 0.00 |

|              |                      |        |                                                                                                              |       |      |      |
|--------------|----------------------|--------|--------------------------------------------------------------------------------------------------------------|-------|------|------|
| A_52_P184588 | NM_001012:Slc2a9     | 117591 | solute carrier family 2 (facilitated glucose transporter), member 9                                          | -7.23 | 0.30 | 0.00 |
| A_52_P508920 | NM_147218 Abca6      | 76184  | ATP-binding cassette, sub-family A (ABC1), member 6                                                          | -4.86 | 0.30 | 0.00 |
| A_52_P574720 | NM_010959 Oit3       | 18302  | oncoprotein induced transcript 3                                                                             | -4.48 | 0.30 | 0.00 |
| A_52_P427438 | AK220454 C2cd2       | 207781 | C2 calcium-dependent domain containing 2                                                                     | -7.02 | 0.30 | 0.00 |
| A_52_P515769 | NM_017378 Pcdh12     | 53601  | protocadherin 12                                                                                             | -3.73 | 0.30 | 0.00 |
| A_51_P356169 | NM_013861 Tpk1       | 29807  | thiamine pyrophosphokinase                                                                                   | -3.89 | 0.30 | 0.00 |
| A_51_P443293 | NM_011933 Decr2      | 26378  | 2-4-dienoyl-Coenzyme A reductase 2, peroxisomal                                                              | -5.51 | 0.30 | 0.00 |
| A_52_P244312 | AK158571 Svip        | 75744  | small VCP/p97-interacting protein                                                                            | -6.40 | 0.30 | 0.00 |
| A_51_P264673 | AK083198 Prlr        | 19116  | prolactin receptor                                                                                           | -6.13 | 0.30 | 0.00 |
| A_52_P575217 | NM_139300 Mylk       | 107589 | myosin, light polypeptide kinase                                                                             | -4.81 | 0.30 | 0.00 |
| A_51_P402583 | NM_008156 Gpld1      | 14756  | glycosylphosphatidylinositol specific phospholipase D1                                                       | -6.64 | 0.30 | 0.00 |
| A_52_P467805 | NM_053196 Sfxn2      | 94279  | sideroflexin 2                                                                                               | -4.11 | 0.30 | 0.00 |
| A_52_P804224 | AK141415 Camk1d      | 227541 | calcium/calmodulin-dependent protein kinase ID                                                               | -4.85 | 0.30 | 0.00 |
| A_51_P277336 | NM_138741 Sdpr       | 20324  | serum deprivation response                                                                                   | -3.21 | 0.30 | 0.01 |
| A_51_P182685 | NM_145157 Defb19     | 246700 | defensin beta 19                                                                                             | -2.74 | 0.30 | 0.05 |
| A_52_P676744 | NM_016973 St6galnac6 | 50935  | ST6 (alpha-N-acetyl-neuraminy-2,3-beta-galactosyl-1,3)-N-acetylgalactosaminide alpha-2,6-sialyltransferase 6 | -5.10 | 0.30 | 0.00 |
| A_52_P277205 | NM_011780 Adam23     | 23792  | a disintegrin and metallopeptidase domain 23                                                                 | -4.50 | 0.30 | 0.00 |
| A_51_P476481 | NM_145548 Cyp2j13    | 230459 | cytochrome P450, family 2, subfamily j, polypeptide 13                                                       | -5.98 | 0.30 | 0.00 |
| A_51_P352303 | NM_011983 Homer2     | 26557  | homer homolog 2 (Drosophila)                                                                                 | -5.99 | 0.30 | 0.00 |
| A_51_P276039 | NM_175150 Txndc15    | 69672  | thioredoxin domain containing 15                                                                             | -5.35 | 0.30 | 0.00 |
| A_51_P495331 | XM_130232 Neb        | 17996  | nebulin                                                                                                      | -4.88 | 0.30 | 0.00 |
| A_51_P300726 | NM_011014 Sigmar1    | 18391  | sigma non-opioid intracellular receptor 1                                                                    | -4.90 | 0.30 | 0.00 |
| A_52_P208471 | NM_145527 Madd       | 228355 | MAP-kinase activating death domain                                                                           | -8.92 | 0.30 | 0.00 |
| A_51_P170795 | NM_178739 Dcaf12l1   | 245404 | DDB1 and CUL4 associated factor 12-like 1                                                                    | -5.18 | 0.30 | 0.00 |
| A_51_P502599 | NM_010004 Cyp2c40    | 13099  | cytochrome P450, family 2, subfamily c, polypeptide 40                                                       | -4.75 | 0.30 | 0.00 |
| A_51_P120137 | NM_201361 Fam82a1    | 381110 | family with sequence similarity 82, member A1                                                                | -5.15 | 0.30 | 0.00 |

|              |           |           |        |                                                                      |        |      |      |
|--------------|-----------|-----------|--------|----------------------------------------------------------------------|--------|------|------|
| A_51_P158638 | NA        | NA        | NA     | NA                                                                   | -5.58  | 0.30 | 0.00 |
| A_51_P451052 | NM_175013 | Pgm5      | 226041 | phosphoglucomutase 5                                                 | -4.99  | 0.30 | 0.00 |
| A_51_P338485 | NM_134042 | Aldh6a1   | 104776 | aldehyde dehydrogenase family 6, subfamily A1                        | -8.04  | 0.30 | 0.00 |
| A_51_P484842 | NM_007493 | Asgr2     | 11890  | asialoglycoprotein receptor 2                                        | -9.56  | 0.30 | 0.00 |
| A_52_P32453  | AK011222  | 1110020A2 | 68531  | RIKEN cDNA 1110020A21 gene                                           | -4.98  | 0.30 | 0.00 |
| A_51_P451574 | NM_012006 | Acot1     | 26897  | acyl-CoA thioesterase 1                                              | -3.47  | 0.30 | 0.01 |
| A_52_P339742 | NM_029787 | Cyb5r3    | 109754 | cytochrome b5 reductase 3                                            | -10.43 | 0.30 | 0.00 |
| A_52_P255494 | BB425408  | Sec22c    | 215474 | SEC22 vesicle trafficking protein homolog C ( <i>S. cerevisiae</i> ) | -5.02  | 0.30 | 0.00 |
| A_51_P320481 | NM_028626 | Mcee      | 73724  | methylmalonyl CoA epimerase                                          | -5.36  | 0.30 | 0.00 |
| A_51_P425772 | NM_021273 | Ckb       | 12709  | creatine kinase, brain                                               | -4.65  | 0.30 | 0.00 |
| A_52_P269057 | AK042006  | Elp4      | 77766  | elongation protein 4 homolog ( <i>S. cerevisiae</i> )                | -6.47  | 0.30 | 0.00 |
| A_51_P268734 | NM_133727 | Kptn      | 70394  | kaptin                                                               | -4.61  | 0.30 | 0.00 |
| A_51_P153565 | NM_008360 | Il18      | 16173  | interleukin 18                                                       | -5.80  | 0.30 | 0.00 |
| A_51_P262230 | NM_145466 | A2ld1     | 223267 | AlG2-like domain 1                                                   | -6.86  | 0.30 | 0.00 |
| A_51_P444437 | NM_025968 | Ptgr1     | 67103  | prostaglandin reductase 1                                            | -5.41  | 0.30 | 0.00 |
| A_51_P239750 | NM_008380 | Inhba     | 16323  | inhibin beta-A                                                       | -6.27  | 0.30 | 0.00 |
| A_51_P395309 | NA        | NA        | NA     | NA                                                                   | -4.05  | 0.30 | 0.00 |
| A_51_P150770 | NM_145852 | Ropn1l    | 252967 | ropporin 1-like                                                      | -5.80  | 0.29 | 0.00 |
| A_51_P304397 | BC100404  | Cpm       | 70574  | carboxypeptidase M                                                   | -5.29  | 0.29 | 0.00 |
| A_51_P190690 | NM_025369 | Mrps36    | 66128  | mitochondrial ribosomal protein S36                                  | -5.34  | 0.29 | 0.00 |
| A_52_P4271   | AK150666  | Tcp1      | 21454  | t-complex protein 1                                                  | -7.29  | 0.29 | 0.00 |
| A_51_P279100 | NM_008969 | Ptgs1     | 19224  | prostaglandin-endoperoxide synthase 1                                | -4.59  | 0.29 | 0.00 |
| A_51_P190697 | NM_025369 | Mrps36    | 66128  | mitochondrial ribosomal protein S36                                  | -7.86  | 0.29 | 0.00 |
| A_51_P484718 | AK018051  | Dock8     | 76088  | dedicator of cytokinesis 8                                           | -5.69  | 0.29 | 0.00 |
| A_51_P394973 | NM_026598 | Ebpl      | 68177  | emopamil binding protein-like                                        | -7.85  | 0.29 | 0.00 |
| A_52_P255782 | NM_175316 | Slco2b1   | 101488 | solute carrier organic anion transporter family, member 2b1          | -4.22  | 0.29 | 0.00 |
| A_52_P965217 | AI451738  | NA        | NA     | NA                                                                   | -7.17  | 0.29 | 0.00 |
| A_52_P184145 | NM_145564 | Fbxo21    | 231670 | F-box protein 21                                                     | -5.88  | 0.29 | 0.00 |
| A_51_P162671 | NM_008035 | Folr2     | 14276  | folate receptor 2 (fetal)                                            | -4.85  | 0.29 | 0.00 |
| A_51_P365885 | NM_001037 | Csf1r     | 12978  | colony stimulating factor 1 receptor                                 | -4.60  | 0.29 | 0.00 |
| A_51_P475244 | NM_133984 | Hemk1     | 69536  | HemK methyltransferase family member 1                               | -5.43  | 0.29 | 0.00 |
| A_51_P478952 | NM_133898 | N4bp2l1   | 100637 | NEDD4 binding protein 2-like 1                                       | -4.37  | 0.29 | 0.00 |

|               |           |                 |        |                                                           |       |      |      |
|---------------|-----------|-----------------|--------|-----------------------------------------------------------|-------|------|------|
| A_52_P187820  | AK017029  | Arhgap26        | 71302  | Rho GTPase activating protein 26                          | -9.03 | 0.29 | 0.00 |
| A_52_P517683  | NM_011526 | Tagln           | 21345  | transgelin                                                | -4.55 | 0.29 | 0.00 |
| A_52_P223618  | NM_026555 | Rcn3            | 52377  | reticulocalbin 3, EF-hand calcium binding domain          | -8.14 | 0.29 | 0.00 |
| A_52_P317653  | NM_009799 | Car1            | 12346  | carbonic anhydrase 1                                      | -7.25 | 0.29 | 0.00 |
| A_51_P402267  | NM_134069 | Slc17a3         | 105355 | solute carrier family 17 (sodium phosphate), member 3     | -3.79 | 0.29 | 0.00 |
| A_51_P329711  | NM_177960 | Idi1            | 319554 | isopentenyl-diphosphate delta isomerase                   | -4.56 | 0.29 | 0.00 |
| A_51_P340355  | NM_172310 | Tarsl2          | 272396 | threonyl-tRNA synthetase-like 2                           | -6.47 | 0.29 | 0.00 |
| A_51_P372473  | NM_016709 | Auh             | 11992  | AU RNA binding protein/enoyl-coenzyme A hydratase         | -7.32 | 0.29 | 0.00 |
| A_52_P210246  | NM_144855 | Cbs             | 12411  | cystathionine beta-synthase                               | -6.58 | 0.29 | 0.00 |
| A_51_P418765  | NM_009266 | Sephs2          | 20768  | selenophosphate synthetase 2                              | -4.84 | 0.29 | 0.00 |
| A_51_P176352  | NM_013864 | Ndrp2           | 29811  | N-myc downstream regulated gene 2                         | -6.74 | 0.29 | 0.00 |
| A_52_P240796  | NM_009040 | Rdh16           | 19683  | retinol dehydrogenase 16                                  | -5.04 | 0.29 | 0.00 |
| A_51_P253481  | NM_021456 | Ces1            | 12623  | carboxylesterase 1                                        | -3.57 | 0.29 | 0.01 |
| A_52_P118706  | NM_176994 | 9630013D2319743 |        | RIKEN cDNA 9630013D21 gene                                | -6.70 | 0.29 | 0.00 |
| A_51_P126563  | NM_008769 | Otc             | 18416  | ornithine transcarbamylase                                | -4.37 | 0.29 | 0.00 |
| A_52_P123230  | NM_175438 | Aldh4a1         | 212647 | aldehyde dehydrogenase 4 family, member A1                | -4.90 | 0.29 | 0.00 |
| A_52_P562267  | NM_001033 | 9130409I2       | 619326 | RIKEN cDNA 9130409I23 gene                                | -5.96 | 0.29 | 0.00 |
| A_51_P165165  | NM_145567 | Hibadh          | 58875  | 3-hydroxyisobutyrate dehydrogenase                        | -6.27 | 0.29 | 0.00 |
| A_51_P104891  | NM_027652 | D5Wsu178        | 28042  | DNA segment, Chr 5, Wayne State University 178, expressed | -2.81 | 0.29 | 0.04 |
| A_51_P109668  | NM_023672 | Ssbp3           | 72475  | single-stranded DNA binding protein 3                     | -5.02 | 0.29 | 0.00 |
| A_51_P212679  | XM_901651 | NA              | NA     | NA                                                        | -8.80 | 0.29 | 0.00 |
| A_51_P324690  | NM_053109 | Clec2d          | 93694  | C-type lectin domain family 2, member d                   | -4.51 | 0.29 | 0.00 |
| A_51_P358112  | NM_146094 | Fads1           | 76267  | fatty acid desaturase 1                                   | -6.32 | 0.29 | 0.00 |
| A_51_P290074  | NM_021272 | Fabp7           | 12140  | fatty acid binding protein 7, brain                       | -4.72 | 0.29 | 0.00 |
| A_52_P1085448 | NA        | NA              | NA     | NA                                                        | -7.34 | 0.29 | 0.00 |
| A_51_P173107  | AK007796  | 1810046K0       | 69809  | RIKEN cDNA 1810046K07 gene                                | -4.26 | 0.29 | 0.00 |
| A_52_P496424  | NM_018859 | Akr1e1          | 56043  | aldo-keto reductase family 1, member E1                   | -4.89 | 0.29 | 0.00 |
| A_52_P544596  | NM_133732 | 4931406C0       | 70984  | RIKEN cDNA 4931406C07 gene                                | -6.68 | 0.29 | 0.00 |
| A_51_P164939  | NM_144916 | Tmem150a        | 232086 | transmembrane protein 150A                                | -4.72 | 0.29 | 0.00 |
| A_52_P618693  | NM_011336 | Ccl27a          | 20301  | chemokine (C-C motif) ligand 27A                          | -5.57 | 0.29 | 0.00 |
| A_52_P615138  | NM_025558 | Cyb5b           | 66427  | cytochrome b5 type B                                      | -7.09 | 0.29 | 0.00 |

|              |           |                |        |                                                        |       |      |      |
|--------------|-----------|----------------|--------|--------------------------------------------------------|-------|------|------|
| A_51_P209401 | BC062811  | 1810020D166273 |        | RIKEN cDNA 1810020D17 gene                             | -7.93 | 0.29 | 0.00 |
| A_51_P457397 | AK009140  | Dpp8           | 74388  | dipeptidylpeptidase 8                                  | -4.35 | 0.29 | 0.00 |
| A_52_P141141 | NM_029347 | Fggy           | 75578  | FGGY carbohydrate kinase domain containing             | -7.73 | 0.29 | 0.00 |
| A_52_P470150 | NM_016672 | Ddc            | 13195  | dopa decarboxylase                                     | -3.74 | 0.29 | 0.00 |
| A_52_P96898  | AK002636  | Srr            | 27364  | serine racemase                                        | -7.17 | 0.29 | 0.00 |
| A_51_P242687 | NA        | NA             | NA     | NA                                                     | -3.86 | 0.29 | 0.00 |
| A_51_P461444 | L26316    | Dhfr           | 13361  | dihydrofolate reductase                                | -7.00 | 0.29 | 0.00 |
| A_51_P443082 | NM_013855 | Abca3          | 27410  | ATP-binding cassette, sub-family A (ABC1), member 3    | -3.73 | 0.29 | 0.00 |
| A_52_P297803 | NM_010941 | Nsdhl          | 18194  | NAD(P) dependent steroid dehydrogenase-like            | -5.24 | 0.28 | 0.00 |
| A_51_P520879 | D89677    | Sh3d19         | 27059  | SH3 domain protein D19                                 | -3.76 | 0.28 | 0.00 |
| A_51_P394115 | NM_023383 | Aadac          | 67758  | arylacetamide deacetylase (esterase)                   | -4.45 | 0.28 | 0.00 |
| A_51_P170823 | NM_019867 | Ngef           | 53972  | neuronal guanine nucleotide exchange factor            | -5.35 | 0.28 | 0.00 |
| A_52_P635278 | NM_199307 | Ece1           | 230857 | endothelin converting enzyme 1                         | -7.71 | 0.28 | 0.00 |
| A_52_P200121 | NM_010004 | Cyp2c40        | 13099  | cytochrome P450, family 2, subfamily c, polypeptide 40 | -3.86 | 0.28 | 0.00 |
| A_51_P393654 | NM_175514 | Fam171b        | 241520 | family with sequence similarity 171, member B          | -7.43 | 0.28 | 0.00 |
| A_52_P302587 | NM_023543 | Chn2           | 69993  | chimerin (chimaerin) 2                                 | -6.34 | 0.28 | 0.00 |
| A_51_P426276 | NM_133667 | Pdk2           | 18604  | pyruvate dehydrogenase kinase, isoenzyme 2             | -8.20 | 0.28 | 0.00 |
| A_51_P157255 | NM_008304 | Sdc2           | 15529  | syndecan 2                                             | -4.69 | 0.28 | 0.00 |
| A_51_P308048 | NM_027294 | Cmtm8          | 70031  | CKLF-like MARVEL transmembrane domain containing 8     | -5.80 | 0.28 | 0.00 |
| A_51_P292550 | AK052715  | Chdh           | 218865 | choline dehydrogenase                                  | -3.53 | 0.28 | 0.01 |
| A_52_P673722 | NM_134094 | Ncald          | 52589  | neurocalcin delta                                      | -4.88 | 0.28 | 0.00 |
| A_52_P45124  | U49949    | Mink1          | 50932  | misshapen-like kinase 1 (zebrafish)                    | -3.69 | 0.28 | 0.00 |
| A_51_P341369 | NM_025861 | Pqlc1          | 66943  | PQ loop repeat containing 1                            | -6.59 | 0.28 | 0.00 |
| A_51_P164203 | NM_019731 | Nme4           | 56520  | non-metastatic cells 4, protein expressed in           | -5.12 | 0.28 | 0.00 |
| A_51_P271160 | NM_147068 | Olfr166        | 259071 | olfactory receptor 166                                 | -3.01 | 0.28 | 0.02 |
| A_52_P55258  | XM_981410 | NA             | NA     | NA                                                     | -6.28 | 0.28 | 0.00 |
| A_52_P236619 | AK050412  | 181000811      | 73625  | RIKEN cDNA 1810008118 gene                             | -3.83 | 0.28 | 0.00 |
| A_51_P259296 | NM_008509 | Lpl            | 16956  | lipoprotein lipase                                     | -5.22 | 0.28 | 0.00 |
| A_51_P470205 | AK018460  | Mobkl2b        | 214944 | MOB1, Mps One Binder kinase activator-like 2B (yeast)  | -5.36 | 0.28 | 0.00 |
| A_51_P345248 | NM_053196 | Sfxn2          | 94279  | sideroflexin 2                                         | -4.91 | 0.28 | 0.00 |

|              |           |           |        |                                                                        |        |      |      |
|--------------|-----------|-----------|--------|------------------------------------------------------------------------|--------|------|------|
| A_52_P249283 | BC064077  | Gm5376    | 385234 | predicted gene 5376                                                    | -6.15  | 0.28 | 0.00 |
| A_52_P405460 | BC008228  | Gprc5c    | 70355  | G protein-coupled receptor, family C, group 5, member C                | -5.52  | 0.28 | 0.00 |
| A_51_P283766 | NM_028199 | Plxdc1    | 72324  | plexin domain containing 1                                             | -7.78  | 0.28 | 0.00 |
| A_52_P337427 | NM_027829 | 9030607L1 | 71564  | RIKEN cDNA 9030607L17 gene                                             | -10.09 | 0.28 | 0.00 |
| A_51_P143682 | NM_021346 | Zfp318    | 57908  | zinc finger protein 318                                                | -5.27  | 0.28 | 0.00 |
| A_51_P221031 | NM_172838 | Slc16a12  | 240638 | solute carrier family 16 (monocarboxylic acid transporters), member 12 | -3.41  | 0.28 | 0.01 |
| A_51_P238183 | XM_903670 | NA        | NA     | NA                                                                     | -5.89  | 0.28 | 0.00 |
| A_51_P352738 | NM_033564 | Mpv17l    | 93734  | Mpv17 transgene, kidney disease mutant-like                            | -4.89  | 0.28 | 0.00 |
| A_51_P447785 | NM_028089 | Cyp2c55   | 72082  | cytochrome P450, family 2, subfamily c, polypeptide 55                 | -4.28  | 0.28 | 0.00 |
| A_51_P115049 | NM_007962 | Mpzl2     | 14012  | myelin protein zero-like 2                                             | -5.35  | 0.28 | 0.00 |
| A_52_P117325 | NM_011250 | Rbl2      | 19651  | retinoblastoma-like 2                                                  | -5.80  | 0.28 | 0.00 |
| A_52_P176659 | V00829    | NA        | NA     | NA                                                                     | -5.63  | 0.28 | 0.00 |
| A_51_P169527 | NM_023556 | Mvk       | 17855  | mevalonate kinase                                                      | -5.22  | 0.28 | 0.00 |
| A_52_P2754   | NM_019467 | Aif1      | 11629  | allograft inflammatory factor 1                                        | -5.08  | 0.28 | 0.00 |
| A_51_P475580 | NM_139297 | Ugp2      | 216558 | UDP-glucose pyrophosphorylase 2                                        | -4.50  | 0.28 | 0.00 |
| A_52_P165657 | NM_007870 | Dnase1l3  | 13421  | deoxyribonuclease 1-like 3                                             | -5.59  | 0.28 | 0.00 |
| A_52_P145912 | NM_139300 | Mylk      | 107589 | myosin, light polypeptide kinase                                       | -6.05  | 0.27 | 0.00 |
| A_51_P352324 | NM_009197 | Slc16a2   | 20502  | solute carrier family 16 (monocarboxylic acid transporters), member 2  | -11.97 | 0.27 | 0.00 |
| A_51_P433837 | NM_001033 | Slc22a23  | 73102  | solute carrier family 22, member 23                                    | -4.56  | 0.27 | 0.00 |
| A_51_P398683 | NM_026555 | Rcn3      | 52377  | reticulocalbin 3, EF-hand calcium binding domain                       | -6.04  | 0.27 | 0.00 |
| A_52_P286098 | NA        | NA        | NA     | NA                                                                     | -6.30  | 0.27 | 0.00 |
| A_52_P407145 | NM_025299 | Txnl4a    | 27366  | thioredoxin-like 4A                                                    | -5.53  | 0.27 | 0.00 |
| A_52_P372062 | NM_133695 | NA        | NA     | NA                                                                     | -11.41 | 0.27 | 0.00 |
| A_51_P199725 | NM_146161 | Arhgap24  | 231532 | Rho GTPase activating protein 24                                       | -9.43  | 0.27 | 0.00 |
| A_52_P63905  | NM_016672 | Ddc       | 13195  | dopa decarboxylase                                                     | -6.09  | 0.27 | 0.00 |
| A_52_P70027  | BC100533  | Cox16     | 66272  | COX16 cytochrome c oxidase assembly homolog (S. cerevisiae)            | -6.09  | 0.27 | 0.00 |
| A_51_P157462 | NM_009060 | Rgn       | 19733  | regucalcin                                                             | -6.51  | 0.27 | 0.00 |
| A_51_P164539 | NM_033474 | Arvcf     | 11877  | armadillo repeat gene deleted in velo-cardio-facial syndrome           | -7.39  | 0.27 | 0.00 |

|              |           |           |        |                                                                                        |        |      |      |
|--------------|-----------|-----------|--------|----------------------------------------------------------------------------------------|--------|------|------|
| A_51_P510764 | AK040702  | Tmem195   | 319660 | transmembrane protein 195                                                              | -5.49  | 0.27 | 0.00 |
| A_51_P239737 | NM_011082 | Pigr      | 18703  | polymeric immunoglobulin receptor                                                      | -4.79  | 0.27 | 0.00 |
| A_51_P295896 | NM_028934 | 4930452B0 | 74430  | RIKEN cDNA 4930452B06 gene                                                             | -6.25  | 0.27 | 0.00 |
| A_52_P61864  | NM_023653 | Wnt2      | 22413  | wingless-related MMTV integration site 2                                               | -5.10  | 0.27 | 0.00 |
| A_51_P462422 | NM_008124 | Gjb1      | 14618  | gap junction protein, beta 1                                                           | -5.58  | 0.27 | 0.00 |
| A_51_P261737 | NM_021517 | Pdzk1     | 59020  | PDZ domain containing 1                                                                | -4.68  | 0.27 | 0.00 |
| A_51_P200529 | NM_138670 | Mpst      | 246221 | mercaptopyruvate sulfurtransferase                                                     | -7.17  | 0.27 | 0.00 |
| A_52_P497908 | BC065077  | Lhx6      | 16874  | LIM homeobox protein 6                                                                 | -5.08  | 0.27 | 0.00 |
| A_51_P410703 | NM_133351 | Prss8     | 76560  | protease, serine, 8 (prostasin)                                                        | -3.77  | 0.27 | 0.00 |
| A_52_P202367 | NM_001013 | Gm10319   | 381806 | predicted gene 10319                                                                   | -5.73  | 0.27 | 0.00 |
| A_51_P242859 | NM_013777 | Akr1c12   | 622402 | aldo-keto reductase family 1, member C12                                               | -8.87  | 0.27 | 0.00 |
| A_52_P551603 | NM_172681 | D930015E0 | 229473 | RIKEN cDNA D930015E06 gene                                                             | -9.60  | 0.27 | 0.00 |
| A_52_P329197 | NM_010049 | Dhfr      | 13361  | dihydrofolate reductase                                                                | -7.45  | 0.27 | 0.00 |
| A_52_P226489 | CJ042244  | NA        | NA     | NA                                                                                     | -5.66  | 0.27 | 0.00 |
| A_51_P397375 | NM_144896 | Pet112l   | 229487 | PET112-like (yeast)                                                                    | -6.97  | 0.27 | 0.00 |
| A_51_P313337 | AK077261  | 2700089E2 | 381820 | RIKEN cDNA 2700089E24 gene                                                             | -4.78  | 0.27 | 0.00 |
| A_51_P295034 | NM_010915 | Klk1b4    | 18048  | kallikrein 1-related peptidase b4                                                      | -6.61  | 0.27 | 0.00 |
| A_51_P424868 | NM_026524 | Mid1ip1   | 68041  | Mid1 interacting protein 1 (gastrulation specific G12-like (zebrafish))                | -4.81  | 0.27 | 0.00 |
| A_51_P282975 | NM_023644 | Mccc1     | 72039  | methylcrotonoyl-Coenzyme A carboxylase 1 (alpha)                                       | -6.51  | 0.27 | 0.00 |
| A_52_P573543 | NM_201607 | Pde4c     | 110385 | phosphodiesterase 4C, cAMP specific                                                    | -7.79  | 0.27 | 0.00 |
| A_51_P194498 | NM_023395 | Wfdc1     | 67866  | WAP four-disulfide core domain 1                                                       | -8.96  | 0.27 | 0.00 |
| A_52_P325388 | AK080904  | Ttc39c    | 72747  | tetratricopeptide repeat domain 39C                                                    | -6.72  | 0.27 | 0.00 |
| A_51_P112223 | NM_010357 | Gsta4     | 14860  | glutathione S-transferase, alpha 4                                                     | -5.46  | 0.27 | 0.00 |
| A_51_P503625 | NM_001077 | Gsta3     | 14859  | glutathione S-transferase, alpha 3                                                     | -4.40  | 0.27 | 0.00 |
| A_51_P359516 | NM_199223 | Rtn4rl2   | 269295 | reticulon 4 receptor-like 2                                                            | -4.54  | 0.27 | 0.00 |
| A_51_P358256 | NM_009803 | Nr1i3     | 12355  | nuclear receptor subfamily 1, group I, member 3                                        | -3.73  | 0.27 | 0.00 |
| A_51_P499905 | NM_010365 | Gtf2i     | 14886  | general transcription factor II I                                                      | -3.76  | 0.27 | 0.00 |
| A_52_P442414 | NM_172928 | Dclk3     | 245038 | doublecortin-like kinase 3                                                             | -10.43 | 0.27 | 0.00 |
| A_51_P422369 | NM_001013 | Odf3b     | 70113  | outer dense fiber of sperm tails 3B                                                    | -6.80  | 0.26 | 0.00 |
| A_51_P214306 | NM_145462 | Haus4     | 219072 | HAUS augmin-like complex, subunit 4                                                    | -5.19  | 0.26 | 0.00 |
| A_51_P404904 | NM_013770 | Slc25a10  | 27376  | solute carrier family 25 (mitochondrial carrier, dicarboxylate transporter), member 10 | -4.59  | 0.26 | 0.00 |



|              |           |           |        |                                                                                                            |       |      |      |
|--------------|-----------|-----------|--------|------------------------------------------------------------------------------------------------------------|-------|------|------|
| A_52_P281924 | NM_016872 | Vamp5     | 53620  | vesicle-associated membrane protein 5                                                                      | -5.35 | 0.26 | 0.00 |
| A_51_P457430 | NM_172960 | Adck5     | 268822 | aarF domain containing kinase 5                                                                            | -5.33 | 0.26 | 0.00 |
| A_51_P406583 | NM_181072 | Myo1e     | 71602  | myosin IE                                                                                                  | -5.46 | 0.26 | 0.00 |
| A_52_P571419 | NA        | NA        | NA     | NA                                                                                                         | -4.23 | 0.26 | 0.00 |
| A_51_P432563 | NM_031178 | Tlr9      | 81897  | toll-like receptor 9                                                                                       | -7.87 | 0.26 | 0.00 |
| A_52_P288251 | NM_001001 | Tmem204   | 407831 | transmembrane protein 204                                                                                  | -5.89 | 0.26 | 0.00 |
| A_52_P561746 | NM_009707 | Arhgap6   | 11856  | Rho GTPase activating protein 6                                                                            | -6.32 | 0.26 | 0.00 |
| A_52_P141136 | AK009249  | Fggy      | 75578  | FGGY carbohydrate kinase domain containing                                                                 | -7.64 | 0.26 | 0.00 |
| A_51_P301274 | AK019926  | 5330431K0 | 68189  | RIKEN cDNA 5330431K02 gene                                                                                 | -5.15 | 0.26 | 0.00 |
| A_52_P129697 | NM_172656 | Stradb    | 227154 | STE20-related kinase adaptor beta                                                                          | -5.70 | 0.26 | 0.00 |
| A_51_P209597 | AK143987  | Afm       | 280662 | afamin                                                                                                     | -9.59 | 0.26 | 0.00 |
| A_52_P521882 | NM_026812 | Hddc3     | 68695  | HD domain containing 3                                                                                     | -5.34 | 0.26 | 0.00 |
| A_52_P387237 | NM_011303 | Dhrs3     | 20148  | dehydrogenase/reductase (SDR family) member 3                                                              | -6.57 | 0.26 | 0.00 |
| A_51_P305138 | NA        | NA        | NA     | NA                                                                                                         | -4.52 | 0.26 | 0.00 |
| A_51_P510037 | NM_053184 | Ugt2a1    | 94215  | UDP glucuronosyltransferase 2 family, polypeptide A1<br>aldo-keto reductase family 7, member A5 (aflatoxin | -4.61 | 0.26 | 0.00 |
| A_51_P188795 | NM_025337 | Akr7a5    | 110198 | aldehyde reductase)                                                                                        | -8.40 | 0.26 | 0.00 |
| A_51_P484869 | NM_010255 | Gamt      | 14431  | guanidinoacetate methyltransferase                                                                         | -4.44 | 0.26 | 0.00 |
| A_51_P208511 | NM_009924 | Cnr2      | 12802  | cannabinoid receptor 2 (macrophage)                                                                        | -6.57 | 0.26 | 0.00 |
| A_51_P237383 | NM_021472 | Rnase4    | 58809  | ribonuclease, RNase A family 4                                                                             | -5.03 | 0.26 | 0.00 |
| A_51_P269546 | NM_031254 | Trem2     | 83433  | triggering receptor expressed on myeloid cells 2                                                           | -5.05 | 0.26 | 0.00 |
| A_51_P475689 | NM_026972 | Cd209b    | 69165  | CD209b antigen                                                                                             | -7.80 | 0.26 | 0.00 |
| A_51_P296737 | NM_027211 | Anxa13    | 69787  | annexin A13                                                                                                | -2.85 | 0.26 | 0.03 |
| A_51_P140576 | NM_001038 | Mapt      | 17762  | microtubule-associated protein tau                                                                         | -6.62 | 0.26 | 0.00 |
| A_51_P424054 | XM_001000 | Btbd2     | 208198 | BTB (POZ) domain containing 2                                                                              | -6.37 | 0.26 | 0.00 |
| A_51_P262766 | NM_007631 | Ccnd1     | 12443  | cyclin D1                                                                                                  | -3.75 | 0.26 | 0.00 |
| A_51_P291304 | BG970498  | NA        | NA     | NA                                                                                                         | -4.60 | 0.26 | 0.00 |
| A_51_P140742 | NM_012043 | Islr      | 26968  | immunoglobulin superfamily containing leucine-rich<br>repeat                                               | -8.07 | 0.26 | 0.00 |
| A_51_P332217 | NM_181418 | Ushbp1    | 234395 | Usher syndrome 1C binding protein 1                                                                        | -5.23 | 0.26 | 0.00 |
| A_52_P485939 | NM_026228 | Slc39a8   | 67547  | solute carrier family 39 (metal ion transporter), member<br>8                                              | -6.16 | 0.26 | 0.00 |

|               |           |           |        |                                                                                              |        |      |      |
|---------------|-----------|-----------|--------|----------------------------------------------------------------------------------------------|--------|------|------|
| A_51_P232901  | NM_009923 | Cnp       | 12799  | 2',3'-cyclic nucleotide 3' phosphodiesterase                                                 | -6.26  | 0.26 | 0.00 |
| A_51_P153170  | NM_029787 | Cyb5r3    | 109754 | cytochrome b5 reductase 3                                                                    | -10.18 | 0.26 | 0.00 |
| A_51_P492366  | NM_007557 | Bmp7      | 12162  | bone morphogenetic protein 7                                                                 | -5.81  | 0.26 | 0.00 |
| A_52_P1022311 | BC039142  | NA        | NA     | NA                                                                                           | -7.24  | 0.26 | 0.00 |
| A_51_P484254  | NM_144844 | Pcca      | 110821 | propionyl-Coenzyme A carboxylase, alpha polypeptide                                          | -6.89  | 0.26 | 0.00 |
| A_51_P191077  | NM_207683 | Pik3c2g   | 18705  | phosphatidylinositol 3-kinase, C2 domain containing, gamma polypeptide                       | -5.60  | 0.26 | 0.00 |
| A_52_P640221  | NM_001042 | Slc22a18  | 18400  | solute carrier family 22 (organic cation transporter), member 18                             | -10.08 | 0.26 | 0.00 |
| A_51_P383399  | NM_011921 | Aldh1a7   | 26358  | aldehyde dehydrogenase family 1, subfamily A7                                                | -4.82  | 0.26 | 0.00 |
| A_51_P434017  | NM_133903 | Spon2     | 100689 | spondin 2, extracellular matrix protein                                                      | -5.85  | 0.26 | 0.00 |
| A_51_P482844  | AK004291  | Pycl      | 66194  | pyrroline-5-carboxylate reductase-like                                                       | -4.76  | 0.26 | 0.00 |
| A_51_P343356  | NM_026158 | Isoc2b    | 67441  | isochorismatase domain containing 2b                                                         | -6.51  | 0.26 | 0.00 |
| A_51_P279308  | NM_028793 | Acbd5     | 74159  | acyl-Coenzyme A binding domain containing 5                                                  | -6.21  | 0.26 | 0.00 |
| A_51_P125467  | NM_010515 | Igf2r     | 16004  | insulin-like growth factor 2 receptor                                                        | -8.14  | 0.26 | 0.00 |
| A_52_P168496  | NM_001077 | Slc1a2    | 20511  | solute carrier family 1 (glial high affinity glutamate transporter), member 2                | -5.65  | 0.26 | 0.00 |
| A_51_P151628  | NM_030717 | Lactb     | 80907  | lactamase, beta                                                                              | -6.45  | 0.26 | 0.00 |
| A_51_P497768  | XM_130488 | NA        | NA     | NA                                                                                           | -5.04  | 0.26 | 0.00 |
| A_51_P196590  | NM_008212 | Hadh      | 15107  | hydroxyacyl-Coenzyme A dehydrogenase                                                         | -5.65  | 0.26 | 0.00 |
| A_51_P502422  | NM_025790 | Acot13    | 66834  | acyl-CoA thioesterase 13                                                                     | -5.95  | 0.26 | 0.00 |
| A_52_P499251  | AK020717  | Cryl1     | 68631  | crystallin, lambda 1                                                                         | -6.37  | 0.26 | 0.00 |
| A_51_P252545  | NM_026447 | Ppm1m     | 67905  | protein phosphatase 1M                                                                       | -6.01  | 0.26 | 0.00 |
| A_51_P214663  | NM_016785 | Tpmt      | 22017  | thiopurine methyltransferase                                                                 | -6.24  | 0.26 | 0.00 |
| A_51_P261092  | NM_145559 | Slc2a9    | 117591 | solute carrier family 2 (facilitated glucose transporter), member 9                          | -4.78  | 0.26 | 0.00 |
| A_52_P479262  | XM_897036 | Col6a3    | 12835  | collagen, type VI, alpha 3                                                                   | -6.95  | 0.26 | 0.00 |
| A_51_P468770  | NM_024273 | 4930455C2 | 76916  | RIKEN cDNA 4930455C21 gene                                                                   | -4.74  | 0.26 | 0.00 |
| A_51_P519364  | NM_145986 | Fam83f    | 213956 | family with sequence similarity 83, member F                                                 | -8.26  | 0.25 | 0.00 |
| A_51_P476879  | NM_172907 | Olfml1    | 244198 | olfactomedin-like 1                                                                          | -5.94  | 0.25 | 0.00 |
| A_52_P424826  | NM_175646 | Txn14b    | 234723 | thioredoxin-like 4B                                                                          | -5.95  | 0.25 | 0.00 |
| A_51_P251352  | NM_015829 | Slc25a13  | 50799  | solute carrier family 25 (mitochondrial carrier, adenine nucleotide translocator), member 13 | -5.50  | 0.25 | 0.00 |

|              |           |           |        |                                                                     |       |      |      |
|--------------|-----------|-----------|--------|---------------------------------------------------------------------|-------|------|------|
| A_52_P92472  | NA        | NA        | NA     | NA                                                                  | -7.53 | 0.25 | 0.00 |
| A_51_P505493 | NM_134255 | Elov15    | 68801  | ELOVL family member 5, elongation of long chain fatty acids (yeast) | -8.73 | 0.25 | 0.00 |
| A_51_P255295 | NM_013485 | C9        | 12279  | complement component 9                                              | -4.22 | 0.25 | 0.00 |
| A_51_P261718 | NM_134037 | Acly      | 104112 | ATP citrate lyase                                                   | -7.04 | 0.25 | 0.00 |
| A_52_P642879 | NM_145564 | Fbxo21    | 231670 | F-box protein 21                                                    | -8.15 | 0.25 | 0.00 |
| A_51_P483511 | NM_028785 | Dock8     | 76088  | dedicator of cytokinesis 8                                          | -7.84 | 0.25 | 0.00 |
| A_51_P403193 | XM_193868 | NA        | NA     | NA                                                                  | -5.95 | 0.25 | 0.00 |
| A_51_P505689 | U92949    | Kifc2     | 16581  | kinesin family member C2                                            | -7.62 | 0.25 | 0.00 |
| A_52_P318040 | NA        | NA        | NA     | NA                                                                  | -6.49 | 0.25 | 0.00 |
| A_51_P496074 | NM_178162 | Agfg2     | 231801 | ArfGAP with FG repeats 2                                            | -5.55 | 0.25 | 0.00 |
| A_52_P532384 | NA        | NA        | NA     | NA                                                                  | -7.77 | 0.25 | 0.00 |
| A_52_P443578 | NM_010074 | Dpp4      | 13482  | dipeptidylpeptidase 4                                               | -4.56 | 0.25 | 0.00 |
| A_51_P492676 | NM_138665 | Sardh     | 192166 | sarcosine dehydrogenase                                             | -7.47 | 0.25 | 0.00 |
| A_52_P497553 | NM_010049 | Dhfr      | 13361  | dihydrofolate reductase                                             | -6.77 | 0.25 | 0.00 |
| A_52_P35340  | NM_133894 | Ugt2b38   | 100559 | UDP glucuronosyltransferase 2 family, polypeptide B38               | -4.17 | 0.25 | 0.00 |
| A_51_P346893 | NM_019578 | Extl1     | 56219  | exostoses (multiple)-like 1                                         | -4.21 | 0.25 | 0.00 |
| A_51_P337101 | NM_172448 | Rnf43     | 207742 | ring finger protein 43                                              | -6.55 | 0.25 | 0.00 |
| A_51_P458778 | NM_008278 | Hpgd      | 15446  | hydroxyprostaglandin dehydrogenase 15 (NAD)                         | -5.33 | 0.25 | 0.00 |
| A_52_P390625 | NM_026572 | Gcsh      | 68133  | glycine cleavage system protein H (aminomethyl carrier)             | -9.49 | 0.25 | 0.00 |
| A_51_P458781 | NM_008278 | Hpgd      | 15446  | hydroxyprostaglandin dehydrogenase 15 (NAD)                         | -4.44 | 0.25 | 0.00 |
| A_52_P427449 | NM_018832 | Magix     | 54634  | MAGI family member, X-linked                                        | -9.76 | 0.25 | 0.00 |
| A_51_P202801 | NM_019875 | Abcb9     | 56325  | ATP-binding cassette, sub-family B (MDR/TAP), member 9              | -6.11 | 0.25 | 0.00 |
| A_51_P165882 | NM_001042 | Slc22a18  | 18400  | solute carrier family 22 (organic cation transporter), member 18    | -9.27 | 0.25 | 0.00 |
| A_52_P590535 | NM_007992 | Fbln2     | 14115  | fibulin 2                                                           | -6.59 | 0.25 | 0.00 |
| A_51_P515949 | NM_147059 | Olfcr668  | 259061 | olfactory receptor 668                                              | -8.02 | 0.25 | 0.00 |
| A_52_P458682 | NM_008182 | Gsta2     | 14858  | glutathione S-transferase, alpha 2 (Yc2)                            | -4.48 | 0.25 | 0.00 |
| A_51_P337195 | NM_008952 | Pipox     | 19193  | pipecolic acid oxidase                                              | -8.33 | 0.25 | 0.00 |
| A_51_P510640 | AK015924  | 4930528F2 | 75178  | RIKEN cDNA 4930528F23 gene                                          | -5.01 | 0.25 | 0.00 |
| A_51_P425680 | NM_019826 | lvd       | 56357  | isovaleryl coenzyme A dehydrogenase                                 | -9.55 | 0.25 | 0.00 |

|               |           |           |        |                                                          |        |      |      |
|---------------|-----------|-----------|--------|----------------------------------------------------------|--------|------|------|
| A_52_P596755  | NM_207161 | BC048355  | 381101 | cDNA sequence BC048355                                   | -5.45  | 0.25 | 0.00 |
| A_52_P297251  | NM_009666 | Amelx     | 11704  | amelogenin X chromosome                                  | -5.40  | 0.25 | 0.00 |
| A_52_P19606   | NM_207530 | Osbpl1a   | 64291  | oxysterol binding protein-like 1A                        | -7.86  | 0.25 | 0.00 |
| A_52_P633752  | NM_007462 | Apc       | 11789  | adenomatosis polyposis coli                              | -8.58  | 0.25 | 0.00 |
| A_52_P175518  | NM_001029 | Rilp      | 280408 | Rab interacting lysosomal protein                        | -6.10  | 0.25 | 0.00 |
| A_52_P569067  | NM_023556 | Mvk       | 17855  | mevalonate kinase                                        | -6.04  | 0.25 | 0.00 |
| A_52_P1013551 | NM_010941 | Nsdhl     | 18194  | NAD(P) dependent steroid dehydrogenase-like              | -5.28  | 0.25 | 0.00 |
| A_52_P582112  | NM_181821 | Hcfc1r1   | 353502 | host cell factor C1 regulator 1 (XPO1-dependent)         | -6.01  | 0.25 | 0.00 |
| A_52_P981179  | NA        | NA        | NA     | NA                                                       | -9.49  | 0.24 | 0.00 |
| A_51_P484054  | NM_010172 | F7        | 14068  | coagulation factor VII                                   | -10.71 | 0.24 | 0.00 |
| A_51_P166244  | BC076637  | Osbpl1a   | 64291  | oxysterol binding protein-like 1A                        | -7.75  | 0.24 | 0.00 |
| A_51_P498882  | NM_010001 | Cyp2c37   | 13096  | cytochrome P450, family 2. subfamily c, polypeptide 37   | -3.44  | 0.24 | 0.01 |
| A_51_P328652  | NM_133348 | Acot7     | 70025  | acyl-CoA thioesterase 7                                  | -8.29  | 0.24 | 0.00 |
| A_51_P383991  | NM_011129 | 4-Sep     | 18952  | septin 4                                                 | -7.88  | 0.24 | 0.00 |
| A_51_P179664  | NM_008185 | Gstt1     | 14871  | glutathione S-transferase, theta 1                       | -5.89  | 0.24 | 0.00 |
| A_51_P157976  | NM_029956 | Mmab      | 77697  | homolog (human)                                          | -5.44  | 0.24 | 0.00 |
| A_52_P347942  | NM_146472 | Olf1r1384 | 258464 | olfactory receptor 1384                                  | -2.83  | 0.24 | 0.04 |
| A_51_P286996  | AF089734  | Fxyd1     | 56188  | FXD domain-containing ion transport regulator 1          | -7.52  | 0.24 | 0.00 |
| A_51_P290626  | NM_178747 | Gulo      | 268756 | gulonolactone (L-) oxidase                               | -8.58  | 0.24 | 0.00 |
| A_52_P287219  | BC055006  | Man2a2    | 140481 | mannosidase 2, alpha 2                                   | -8.53  | 0.24 | 0.00 |
| A_52_P163626  | BC026782  | BC026782  | 545366 | cDNA sequence BC026782                                   | -5.53  | 0.24 | 0.00 |
| A_51_P138933  | NM_177741 | Ppp1r3b   | 244416 | protein phosphatase 1, regulatory (inhibitor) subunit 3B | -5.03  | 0.24 | 0.00 |
| A_51_P186601  | M29546    | Me1       | 17436  | malic enzyme 1, NADP(+)-dependent, cytosolic             | -4.26  | 0.24 | 0.00 |
| A_51_P120448  | NM_025855 | Echdc1    | 52665  | enoyl Coenzyme A hydratase domain containing 1           | -6.12  | 0.24 | 0.00 |
| A_51_P496045  | AK020592  | 9530039L2 | 78422  | RIKEN cDNA 9530039L23 gene                               | -2.92  | 0.24 | 0.03 |
| A_52_P256182  | NA        | NA        | NA     | NA                                                       | -5.41  | 0.24 | 0.00 |
| A_52_P246255  | NM_009997 | Cyp2a4    | 13086  | cytochrome P450, family 2, subfamily a, polypeptide 4    | -3.64  | 0.24 | 0.00 |
| A_51_P206153  | D13903    | Ptprd     | 19266  | protein tyrosine phosphatase, receptor type, D           | -8.32  | 0.24 | 0.00 |

|              |           |           |        |                                                                                           |        |      |      |
|--------------|-----------|-----------|--------|-------------------------------------------------------------------------------------------|--------|------|------|
| A_51_P521010 | NM_016854 | Ppp1r3c   | 53412  | protein phosphatase 1, regulatory (inhibitor) subunit 3C                                  | -4.48  | 0.24 | 0.00 |
| A_52_P50623  | AK037554  | Itk       | 16428  | IL2-inducible T-cell kinase                                                               | -3.20  | 0.24 | 0.01 |
| A_52_P550147 | NM_172463 | Sned1     | 208777 | sushi, nidogen and EGF-like domains 1                                                     | -8.71  | 0.24 | 0.00 |
| A_52_P605266 | NM_011211 | Ptprd     | 19266  | protein tyrosine phosphatase, receptor type, D                                            | -6.70  | 0.24 | 0.00 |
| A_52_P634039 | AK172886  | Gpd1l     | 333433 | glycerol-3-phosphate dehydrogenase 1-like                                                 | -5.26  | 0.24 | 0.00 |
| A_51_P471458 | NM_020564 | Sult5a1   | 57429  | sulfotransferase family 5A, member 1                                                      | -5.07  | 0.24 | 0.00 |
| A_52_P411667 | NA        | NA        | NA     | NA                                                                                        | -10.40 | 0.24 | 0.00 |
| A_51_P277745 | NM_013806 | Abcc2     | 12780  | ATP-binding cassette, sub-family C (CFTR/MRP), member 2                                   | -6.99  | 0.24 | 0.00 |
| A_51_P353895 | NM_026935 | Sult1c2   | 69083  | sulfotransferase family, cytosolic, 1C, member 2                                          | -5.34  | 0.24 | 0.00 |
| A_52_P668514 | AK031324  | Kank2     | 235041 | KN motif and ankyrin repeat domains 2                                                     | -7.39  | 0.24 | 0.00 |
| A_52_P121486 | NM_080465 | Kcnn2     | 140492 | potassium intermediate/small conductance calcium-activated channel, subfamily N, member 2 | -5.02  | 0.24 | 0.00 |
| A_52_P368167 | NM_028372 | Mblac2    | 72852  | metallo-beta-lactamase domain containing 2                                                | -7.41  | 0.24 | 0.00 |
| A_51_P257885 | NM_175217 | Mmd2      | 75104  | monocyte to macrophage differentiation-associated 2                                       | -5.82  | 0.24 | 0.00 |
| A_51_P127215 | AK033655  | Sesn3     | 75747  | sestrin 3                                                                                 | -6.89  | 0.24 | 0.00 |
| A_51_P177691 | NM_008075 | Gabbr1    | 14408  | gamma-aminobutyric acid (GABA) C receptor, subunit rho 1                                  | -7.63  | 0.24 | 0.00 |
| A_52_P42242  | NM_139297 | Ugp2      | 216558 | UDP-glucose pyrophosphorylase 2                                                           | -6.58  | 0.24 | 0.00 |
| A_51_P345792 | NM_029186 | Tmem180   | 75146  | transmembrane protein 180                                                                 | -5.59  | 0.24 | 0.00 |
| A_51_P289239 | NM_007977 | F8        | 14069  | coagulation factor VIII                                                                   | -7.09  | 0.24 | 0.00 |
| A_52_P401614 | NM_175289 | NA        | NA     | NA                                                                                        | -5.48  | 0.24 | 0.00 |
| A_51_P140368 | NM_026844 | 2310061C1 | 66531  | RIKEN cDNA 2310061C15 gene                                                                | -6.30  | 0.24 | 0.00 |
| A_52_P203398 | NM_025834 | Proz      | 66901  | protein Z, vitamin K-dependent plasma glycoprotein                                        | -6.92  | 0.24 | 0.00 |
| A_51_P166288 | NM_025371 | Acy1      | 109652 | aminoacylase 1                                                                            | -7.79  | 0.24 | 0.00 |
| A_51_P181319 | NM_026428 | Dcxr      | 67880  | dicarbonyl L-xylulose reductase                                                           | -7.85  | 0.24 | 0.00 |
| A_52_P150903 | AK041002  | Tubb6     | 67951  | tubulin, beta 6                                                                           | -4.96  | 0.24 | 0.00 |
| A_52_P361165 | NM_007494 | Ass1      | 11898  | argininosuccinate synthetase 1                                                            | -5.81  | 0.23 | 0.00 |
| A_52_P9703   | NM_009997 | Cyp2a4    | 13086  | cytochrome P450, family 2, subfamily a, polypeptide 4                                     | -3.54  | 0.23 | 0.01 |

|              |           |           |        |                                                                                                       |        |      |      |
|--------------|-----------|-----------|--------|-------------------------------------------------------------------------------------------------------|--------|------|------|
| A_52_P596115 | NA        | NA        | NA     | NA                                                                                                    | -8.53  | 0.23 | 0.00 |
| A_51_P384033 | NM_011183 | Psен2     | 19165  | presenilin 2                                                                                          | -6.31  | 0.23 | 0.00 |
| A_51_P139030 | NM_023805 | Slc38a3   | 76257  | solute carrier family 38, member 3<br>transmembrane and tetratricopeptide repeat containing           | -7.34  | 0.23 | 0.00 |
| A_51_P508485 | NM_028651 | Tmtc4     | 70551  | 4                                                                                                     | -7.18  | 0.23 | 0.00 |
| A_52_P381484 | NM_133903 | Spon2     | 100689 | spondin 2, extracellular matrix protein<br>ELOVL family member 5, elongation of long chain fatty      | -4.87  | 0.23 | 0.00 |
| A_52_P676944 | NM_134255 | Elovl5    | 68801  | acids (yeast)                                                                                         | -9.27  | 0.23 | 0.00 |
| A_52_P91265  | NM_013855 | Abca3     | 27410  | ATP-binding cassette, sub-family A (ABC1), member 3<br>calcium/calmodulin-dependent protein kinase II | -5.36  | 0.23 | 0.00 |
| A_52_P64687  | NM_025451 | Camk2n1   | 66259  | inhibitor 1                                                                                           | -5.94  | 0.23 | 0.00 |
| A_51_P482051 | NM_007820 | Cyp3a16   | 13114  | cytochrome P450, family 3, subfamily a, polypeptide 16                                                | -5.01  | 0.23 | 0.00 |
| A_52_P619880 | BC048732  | 261000211 | 72341  | RIKEN cDNA 2610002117                                                                                 | -5.28  | 0.23 | 0.00 |
| A_51_P290207 | NM_153526 | Insig1    | 231070 | insulin induced gene 1                                                                                | -6.40  | 0.23 | 0.00 |
| A_51_P159711 | NM_053070 | Car7      | 12354  | carbonic anhydrase 7<br>biphenyl hydrolase-like (serine hydrolase, breast                             | -9.31  | 0.23 | 0.00 |
| A_51_P283876 | NM_026512 | Bphl      | 68021  | epithelial mucin-associated antigen)<br>cadherin, EGF LAG seven-pass G-type receptor 1                | -5.29  | 0.23 | 0.00 |
| A_51_P440743 | NM_009886 | Celsr1    | 12614  | (flamingo homolog, Drosophila)                                                                        | -3.53  | 0.23 | 0.01 |
| A_51_P167551 | NM_153584 | BC031353  | 235493 | cDNA sequence BC031353                                                                                | -4.55  | 0.23 | 0.00 |
| A_51_P276766 | NM_007416 | Adra1b    | 11548  | adrenergic receptor, alpha 1b                                                                         | -13.44 | 0.23 | 0.00 |
| A_52_P353417 | NM_010299 | Gm2a      | 14667  | GM2 ganglioside activator protein                                                                     | -7.83  | 0.23 | 0.00 |
| A_51_P251069 | NM_008961 | Pter      | 19212  | phosphotriesterase related                                                                            | -3.73  | 0.23 | 0.00 |
| A_52_P550069 | NM_019826 | Ivd       | 56357  | isovaleryl coenzyme A dehydrogenase                                                                   | -9.48  | 0.23 | 0.00 |
| A_51_P355301 | NM_007818 | Cyp3a11   | 13112  | cytochrome P450, family 3, subfamily a, polypeptide 11                                                | -3.67  | 0.23 | 0.00 |
| A_51_P190106 | BC033592  | Ralgps2   | 78255  | Ral GEF with PH domain and SH3 binding motif 2                                                        | -7.81  | 0.23 | 0.00 |
| A_51_P399652 | NM_029939 | Ccdc151   | 77609  | coiled-coil domain containing 151                                                                     | -9.00  | 0.23 | 0.00 |
| A_51_P309184 | NM_008993 | Pxmp2     | 19301  | peroxisomal membrane protein 2                                                                        | -7.55  | 0.23 | 0.00 |
| A_51_P338713 | M31690    | Ass1      | 11898  | argininosuccinate synthetase 1                                                                        | -5.25  | 0.23 | 0.00 |
| A_51_P510031 | NM_053184 | Ugt2a1    | 94215  | UDP glucuronosyltransferase 2 family, polypeptide A1                                                  | -7.55  | 0.23 | 0.00 |

|              |           |                |        |                                                                    |       |      |      |
|--------------|-----------|----------------|--------|--------------------------------------------------------------------|-------|------|------|
| A_52_P110812 | NM_019802 | Ggcx           | 56316  | gamma-glutamyl carboxylase                                         | -5.67 | 0.23 | 0.00 |
| A_52_P361462 | NM_174870 | Slc26a1        | 231583 | solute carrier family 26 (sulfate transporter), member 1           | -5.99 | 0.23 | 0.00 |
| A_51_P502838 | AK039198  | Ube2h          | 22214  | ubiquitin-conjugating enzyme E2H                                   | -5.63 | 0.23 | 0.00 |
| A_52_P187987 | AK009064  | 2310001H176432 |        | RIKEN cDNA 2310001H17 gene                                         | -5.73 | 0.23 | 0.00 |
| A_52_P392229 | AK039635  | Rnf152         | 320311 | ring finger protein 152                                            | -6.14 | 0.23 | 0.00 |
| A_52_P507498 | AK011113  | Plxnc1         | 54712  | plexin C1                                                          | -4.17 | 0.23 | 0.00 |
| A_51_P127469 | NM_024284 | Hagh           | 14651  | hydroxyacyl glutathione hydrolase                                  | -6.51 | 0.23 | 0.00 |
| A_52_P382926 | NM_145973 | Ell3           | 269344 | elongation factor RNA polymerase II-like 3                         | -5.84 | 0.22 | 0.00 |
| A_52_P195809 | NM_027208 | Bdh2           | 69772  | 3-hydroxybutyrate dehydrogenase, type 2                            | -6.99 | 0.22 | 0.00 |
| A_51_P213691 | NM_011324 | Scnn1a         | 20276  | sodium channel, nonvoltage-gated 1 alpha                           | -9.99 | 0.22 | 0.00 |
| A_51_P163106 | NM_175177 | Bdh1           | 71911  | 3-hydroxybutyrate dehydrogenase, type 1                            | -5.44 | 0.22 | 0.00 |
| A_52_P468343 | AK146962  | Bdh1           | 71911  | 3-hydroxybutyrate dehydrogenase, type 1                            | -3.97 | 0.22 | 0.00 |
| A_52_P315766 | NM_010007 | Cyp2j5         | 13109  | cytochrome P450, family 2, subfamily j, polypeptide 5              | -7.39 | 0.22 | 0.00 |
| A_51_P114236 | NA        | NA             | NA     | NA                                                                 | -6.62 | 0.22 | 0.00 |
| A_51_P146655 | NM_029880 | Ptgr2          | 77219  | prostaglandin reductase 2                                          | -5.96 | 0.22 | 0.00 |
| A_51_P327141 | NM_009539 | Zap70          | 22637  | zeta-chain (TCR) associated protein kinase                         | -8.13 | 0.22 | 0.00 |
| A_52_P393392 | NM_153526 | Insig1         | 231070 | insulin induced gene 1                                             | -8.11 | 0.22 | 0.00 |
| A_51_P282947 | NM_011303 | Dhrs3          | 20148  | dehydrogenase/reductase (SDR family) member 3                      | -8.34 | 0.22 | 0.00 |
| A_52_P193941 | NM_027987 | Cd300lg        | 52685  | CD300 antigen like family member G                                 | -6.11 | 0.22 | 0.00 |
| A_51_P200667 | NM_053155 | Clmn           | 94040  | calmin                                                             | -5.62 | 0.22 | 0.00 |
| A_52_P501007 | NM_009467 | Ugt2b5         | 22238  | UDP glucuronosyltransferase 2 family, polypeptide B5               | -4.40 | 0.22 | 0.00 |
| A_52_P458279 | NM_011169 | Prlr           | 19116  | prolactin receptor                                                 | -6.53 | 0.22 | 0.00 |
| A_51_P423484 | NM_011254 | Rbp1           | 19659  | retinol binding protein 1, cellular                                | -5.54 | 0.22 | 0.00 |
| A_51_P264336 | NM_018795 | Abcc6          | 27421  | ATP-binding cassette, sub-family C (CFTR/MRP), member 6            | -5.96 | 0.22 | 0.00 |
| A_51_P145520 | NM_023059 | Sigirr         | 24058  | single immunoglobulin and toll-interleukin 1 receptor (TIR) domain | -6.01 | 0.22 | 0.00 |
| A_51_P355943 | NM_138656 | Mvd            | 192156 | mevalonate (diphospho) decarboxylase                               | -4.72 | 0.22 | 0.00 |
| A_51_P256093 | NM_011943 | Map2k6         | 26399  | mitogen-activated protein kinase kinase 6                          | -9.47 | 0.22 | 0.00 |

|              |           |           |        |                                                                                |        |      |      |
|--------------|-----------|-----------|--------|--------------------------------------------------------------------------------|--------|------|------|
| A_51_P421418 | NM_008293 | Hsd3b1    | 15492  | hydroxy-delta-5-steroid dehydrogenase, 3 beta- and steroid delta-isomerase 1   | -8.61  | 0.22 | 0.00 |
| A_51_P162162 | NM_009349 | Inmt      | 21743  | indolethylamine N-methyltransferase                                            | -4.54  | 0.22 | 0.00 |
| A_51_P276802 | NM_054080 | Akr1c20   | 116852 | aldo-keto reductase family 1, member C20                                       | -7.74  | 0.22 | 0.00 |
| A_51_P161342 | NM_023732 | Abcb6     | 74104  | ATP-binding cassette, sub-family B (MDR/TAP), member 6                         | -8.43  | 0.22 | 0.00 |
| A_51_P348665 | NM_016894 | Ramp1     | 51801  | receptor (calcitonin) activity modifying protein 1                             | -7.76  | 0.22 | 0.00 |
| A_52_P234127 | AK031268  | Odz3      | 23965  | odd Oz/ten-m homolog 3 (Drosophila)                                            | -6.54  | 0.22 | 0.00 |
| A_51_P418056 | NM_172769 | Sc5d      | 235293 | sterol-C5-desaturase (fungal ERG3, delta-5-desaturase) homolog (S. cerevisiae) | -7.43  | 0.22 | 0.00 |
| A_52_P685021 | NM_021704 | Cxcl12    | 20315  | chemokine (C-X-C motif) ligand 12                                              | -6.24  | 0.22 | 0.00 |
| A_51_P465582 | NM_024257 | Hdhd3     | 72748  | haloacid dehalogenase-like hydrolase domain containing 3                       | -4.08  | 0.22 | 0.00 |
| A_51_P391631 | NM_145364 | Akr1d1    | 208665 | aldo-keto reductase family 1, member D1                                        | -4.85  | 0.22 | 0.00 |
| A_51_P124535 | NM_008590 | Mest      | 17294  | mesoderm specific transcript                                                   | -7.26  | 0.22 | 0.00 |
| A_51_P208537 | XM_902328 | NA        | NA     | NA                                                                             | -5.18  | 0.22 | 0.00 |
| A_51_P318262 | NM_010403 | Hao1      | 15112  | hydroxyacid oxidase 1, liver                                                   | -4.75  | 0.22 | 0.00 |
| A_52_P70032  | BC100533  | Cox16     | 66272  | COX16 cytochrome c oxidase assembly homolog (S. cerevisiae)                    | -7.66  | 0.22 | 0.00 |
| A_51_P341203 | NM_017396 | Cyp3a41a  | 53973  | cytochrome P450, family 3, subfamily a, polypeptide 41A                        | -5.53  | 0.22 | 0.00 |
| A_51_P411527 | BC052507  | Afmid     | 71562  | arylformamidase                                                                | -8.27  | 0.21 | 0.00 |
| A_51_P513311 | NM_009107 | Rxrg      | 20183  | retinoid X receptor gamma                                                      | -8.30  | 0.21 | 0.00 |
| A_51_P175699 | NM_026443 | 1700020C1 | 67900  | RIKEN cDNA 1700020C11 gene                                                     | -4.34  | 0.21 | 0.00 |
| A_51_P307872 | NM_010007 | Cyp2j5    | 13109  | cytochrome P450, family 2, subfamily j, polypeptide 5                          | -7.22  | 0.21 | 0.00 |
| A_51_P265219 | NM_175523 | Ppm1k     | 243382 | protein phosphatase 1K (PP2C domain containing)                                | -4.99  | 0.21 | 0.00 |
| A_51_P113205 | NM_031164 | F13b      | 14060  | coagulation factor XIII, beta subunit                                          | -6.14  | 0.21 | 0.00 |
| A_52_P16419  | NM_010271 | Gpd1      | 14555  | glycerol-3-phosphate dehydrogenase 1 (soluble)                                 | -3.89  | 0.21 | 0.00 |
| A_51_P267653 | NM_153157 | Olfm3     | 229759 | olfactomedin 3                                                                 | -9.76  | 0.21 | 0.00 |
| A_51_P401921 | NM_011480 | Srebf1    | 20787  | sterol regulatory element binding transcription factor 1                       | -10.26 | 0.21 | 0.00 |
| A_51_P334942 | NM_013467 | Aldh1a1   | 11668  | aldehyde dehydrogenase family 1, subfamily A1                                  | -5.67  | 0.21 | 0.00 |



|              |           |                |        |                                                                                           |        |      |      |
|--------------|-----------|----------------|--------|-------------------------------------------------------------------------------------------|--------|------|------|
| A_51_P210293 | NM_172952 | Gphn           | 268566 | gephyrin                                                                                  | -4.43  | 0.21 | 0.00 |
| A_51_P142046 | NM_025560 | 1810049H166431 |        | RIKEN cDNA 1810049H13 gene                                                                | -5.17  | 0.21 | 0.00 |
| A_51_P470935 | NM_027208 | Bdh2           | 69772  | 3-hydroxybutyrate dehydrogenase, type 2                                                   | -6.89  | 0.21 | 0.00 |
| A_51_P433127 | NM_025654 | Rdm1           | 66599  | RAD52 motif 1                                                                             | -10.30 | 0.21 | 0.00 |
| A_52_P501167 | XM_620568 | NA             | NA     | NA                                                                                        | -8.55  | 0.21 | 0.00 |
| A_51_P293853 | NM_010271 | Gpd1           | 14555  | glycerol-3-phosphate dehydrogenase 1 (soluble)                                            | -6.66  | 0.21 | 0.00 |
| A_52_P274496 | NM_183180 | Tspan18        | 241556 | tetraspanin 18                                                                            | -7.53  | 0.21 | 0.00 |
| A_51_P309854 | NM_080465 | Kcnn2          | 140492 | potassium intermediate/small conductance calcium-activated channel, subfamily N, member 2 | -4.42  | 0.21 | 0.00 |
| A_51_P399071 | NM_009672 | Anp32a         | 11737  | acidic (leucine-rich) nuclear phosphoprotein 32 family, member A                          | -7.90  | 0.21 | 0.00 |
| A_52_P629487 | NM_009150 | Selenbp1       | 20341  | selenium binding protein 1                                                                | -5.23  | 0.21 | 0.00 |
| A_52_P257426 | NM_133191 | Eps8l2         | 98845  | EPS8-like 2                                                                               | -7.27  | 0.21 | 0.00 |
| A_51_P341832 | NM_008743 | Nthl1          | 18207  | nth (endonuclease III)-like 1 (E.coli)                                                    | -9.18  | 0.21 | 0.00 |
| A_52_P418791 | NM_011254 | Rbp1           | 19659  | retinol binding protein 1, cellular                                                       | -4.82  | 0.21 | 0.00 |
| A_51_P332140 | NM_009900 | Clcn2          | 12724  | chloride channel 2                                                                        | -4.22  | 0.21 | 0.00 |
| A_52_P608474 | BC027582  | LOC269472      | 269472 | hypothetical LOC269472                                                                    | -9.34  | 0.21 | 0.00 |
| A_52_P322421 | NM_007962 | Mpzl2          | 14012  | myelin protein zero-like 2                                                                | -4.41  | 0.21 | 0.00 |
| A_52_P610923 | NM_139305 | Car9           | 230099 | carbonic anhydrase 9                                                                      | -5.25  | 0.21 | 0.00 |
| A_52_P432124 | NM_001077 | Gsta3          | 14859  | glutathione S-transferase, alpha 3                                                        | -5.31  | 0.21 | 0.00 |
| A_51_P346179 | NM_026690 | Aspdh          | 68352  | aspartate dehydrogenase domain containing                                                 | -11.73 | 0.21 | 0.00 |
| A_52_P612058 | AK031083  | Cdca2          | 108912 | cell division cycle associated 2                                                          | -7.66  | 0.21 | 0.00 |
| A_52_P81783  | BC029786  | Gspt1          | 14852  | G1 to S phase transition 1                                                                | -5.15  | 0.21 | 0.00 |
| A_51_P467110 | NM_010074 | Dpp4           | 13482  | dipeptidylpeptidase 4                                                                     | -7.56  | 0.21 | 0.00 |
| A_51_P445841 | NM_145470 | Depdc6         | 97998  | DEP domain containing 6                                                                   | -7.62  | 0.21 | 0.00 |
| A_52_P402127 | BC093515  | NA             | NA     | NA                                                                                        | -5.56  | 0.21 | 0.00 |
| A_51_P102438 | NM_001029 | Ugt2b36        | 231396 | UDP glucuronosyltransferase 2 family, polypeptide B36                                     | -5.77  | 0.21 | 0.00 |
| A_51_P189442 | NM_011996 | Adh4           | 26876  | alcohol dehydrogenase 4 (class II), pi polypeptide                                        | -5.57  | 0.20 | 0.00 |
| A_51_P194853 | NM_146013 | Sec14l4        | 103655 | SEC14-like 4 (S. cerevisiae)                                                              | -6.56  | 0.20 | 0.00 |
| A_52_P376502 | NM_177343 | Camk1d         | 227541 | calcium/calmodulin-dependent protein kinase ID                                            | -6.25  | 0.20 | 0.00 |

|               |           |           |        |                                                                                          |        |      |      |
|---------------|-----------|-----------|--------|------------------------------------------------------------------------------------------|--------|------|------|
| A_51_P246844  | NM_007379 | Abca2     | 11305  | ATP-binding cassette, sub-family A (ABC1), member 2                                      | -8.95  | 0.20 | 0.00 |
| A_51_P478881  | NM_146213 | Ces8      | 234677 | carboxylesterase 8 (putative)                                                            | -4.12  | 0.20 | 0.00 |
| A_52_P458177  | AB099518  | Mettl7a2  | 393082 | methyltransferase like 7A2                                                               | -9.34  | 0.20 | 0.00 |
| A_52_P597618  | NM_007981 | Acsl1     | 14081  | acyl-CoA synthetase long-chain family member 1                                           | -7.39  | 0.20 | 0.00 |
| A_52_P554703  | NM_183183 | Gprn3     | 243385 | GPRIN family member 3                                                                    | -5.13  | 0.20 | 0.00 |
| A_51_P461319  | NM_025961 | Gatm      | 67092  | glycine amidinotransferase (L-arginine:glycine amidinotransferase)                       | -10.15 | 0.20 | 0.00 |
| A_51_P297900  | NM_009306 | Syt1      | 20979  | synaptotagmin I                                                                          | -10.87 | 0.20 | 0.00 |
| A_51_P383774  | NM_010314 | Gngt1     | 14699  | guanine nucleotide binding protein (G protein), gamma transducing activity polypeptide 1 | -6.09  | 0.20 | 0.00 |
| A_52_P512301  | NM_019479 | Hes6      | 55927  | hairy and enhancer of split 6 (Drosophila)                                               | -5.34  | 0.20 | 0.00 |
| A_52_P571006  | NM_177380 | Cyp3a44   | 337924 | cytochrome P450, family 3, subfamily a, polypeptide 44                                   | -5.03  | 0.20 | 0.00 |
| A_51_P337918  | NM_175438 | Aldh4a1   | 212647 | aldehyde dehydrogenase 4 family, member A1                                               | -6.52  | 0.20 | 0.00 |
| A_51_P302566  | NM_172778 | Maob      | 109731 | monoamine oxidase B                                                                      | -12.40 | 0.20 | 0.00 |
| A_51_P496432  | NM_007981 | Acsl1     | 14081  | acyl-CoA synthetase long-chain family member 1                                           | -7.14  | 0.20 | 0.00 |
| A_51_P408989  | NM_026038 | 2810055F1 | 67217  | RIKEN cDNA 2810055F11 gene                                                               | -4.96  | 0.20 | 0.00 |
| A_52_P120510  | NM_178747 | Gulo      | 268756 | gulonolactone (L-) oxidase                                                               | -9.83  | 0.20 | 0.00 |
| A_52_P259817  | NM_029692 | Upp2      | 76654  | uridine phosphorylase 2                                                                  | -4.40  | 0.20 | 0.00 |
| A_51_P406557  | XM_283952 | AI464131  | 329828 | expressed sequence AI464131                                                              | -6.04  | 0.20 | 0.00 |
| A_51_P477875  | NM_011393 | Slc1a2    | 20511  | solute carrier family 1 (glial high affinity glutamate transporter), member 2            | -6.36  | 0.20 | 0.00 |
| A_52_P278354  | NM_007557 | Bmp7      | 12162  | bone morphogenetic protein 7                                                             | -5.86  | 0.20 | 0.00 |
| A_52_P459211  | AK044736  | A930038B1 | 320323 | RIKEN cDNA A930038B10 gene                                                               | -9.19  | 0.20 | 0.00 |
| A_51_P389543  | NM_054053 | Gpr98     | 110789 | G protein-coupled receptor 98                                                            | -6.20  | 0.20 | 0.00 |
| A_51_P518893  | NM_001002 | Ccin      | 442829 | calicin                                                                                  | -9.33  | 0.20 | 0.00 |
| A_51_P426739  | NM_182805 | Gpt       | 76282  | glutamic pyruvic transaminase, soluble                                                   | -7.40  | 0.20 | 0.00 |
| A_52_P661503  | AK170208  | Depdc6    | 97998  | DEP domain containing 6                                                                  | -6.24  | 0.20 | 0.00 |
| A_52_P595871  | NM_009993 | Cyp1a2    | 13077  | cytochrome P450, family 1, subfamily a, polypeptide 2                                    | -5.57  | 0.20 | 0.00 |
| A_52_P1021832 | AI627138  | NA        | NA     | NA                                                                                       | -5.68  | 0.20 | 0.00 |
| A_52_P151320  | NM_025566 | Tnfaip8l1 | 66443  | tumor necrosis factor, alpha-induced protein 8-like 1                                    | -5.24  | 0.20 | 0.00 |

|              |           |           |        |                                                                                    |        |      |      |
|--------------|-----------|-----------|--------|------------------------------------------------------------------------------------|--------|------|------|
| A_51_P434928 | NM_146287 | Olfr114   | 258284 | olfactory receptor 114                                                             | -7.31  | 0.20 | 0.00 |
| A_51_P316173 | NM_145845 | V1ri1     | 252907 | vomer nasal 1 receptor, l1                                                         | -8.77  | 0.20 | 0.00 |
| A_51_P190740 | NM_007421 | Adssl1    | 11565  | adenylosuccinate synthetase like 1                                                 | -8.97  | 0.19 | 0.00 |
| A_51_P249360 | NM_173733 | Suox      | 211389 | sulfite oxidase                                                                    | -7.25  | 0.19 | 0.00 |
| A_52_P296864 | AK014177  | 3110045C2 | 67303  | RIKEN cDNA 3110045C21 gene                                                         | -5.61  | 0.19 | 0.00 |
| A_51_P170959 | AK005011  | Proz      | 66901  | protein Z, vitamin K-dependent plasma glycoprotein                                 | -10.22 | 0.19 | 0.00 |
| A_52_P54280  | NM_023341 | Cabc1     | 67426  | chaperone, ABC1 activity of bc1 complex like (S. pombe)                            | -5.38  | 0.19 | 0.00 |
| A_52_P616229 | NM_026622 | 3110057O1 | 269423 | RIKEN cDNA 3110057O12 gene                                                         | -8.10  | 0.19 | 0.00 |
| A_51_P206225 | NM_144940 | Uroc1     | 243537 | urocanase domain containing 1                                                      | -6.44  | 0.19 | 0.00 |
| A_52_P557265 | NM_018887 | Cyp39a1   | 56050  | cytochrome P450, family 39, subfamily a, polypeptide 1                             | -7.56  | 0.19 | 0.00 |
| A_51_P163578 | NM_172881 | Ugt2b35   | 243085 | UDP glucuronosyltransferase 2 family, polypeptide B35                              | -4.27  | 0.19 | 0.00 |
| A_52_P35581  | NA        | NA        | NA     | NA                                                                                 | -13.39 | 0.19 | 0.00 |
| A_51_P243342 | NM_010347 | Aes       | 14797  | amino-terminal enhancer of split<br>inturned planar cell polarity effector homolog | -11.50 | 0.19 | 0.00 |
| A_51_P401176 | NM_175515 | Intu      | 380614 | (Drosophila)                                                                       | -10.57 | 0.19 | 0.00 |
| A_51_P279914 | NM_174870 | Slc26a1   | 231583 | solute carrier family 26 (sulfate transporter), member 1                           | -4.47  | 0.19 | 0.00 |
| A_51_P305140 | NM_008181 | Gsta1     | 14857  | glutathione S-transferase, alpha 1 (Ya)                                            | -4.75  | 0.19 | 0.00 |
| A_51_P272147 | NM_033146 | Fam158a   | 85308  | family with sequence similarity 158, member A                                      | -5.90  | 0.19 | 0.00 |
| A_51_P252000 | NM_144796 | Susd4     | 96935  | sushi domain containing 4                                                          | -6.09  | 0.19 | 0.00 |
| A_51_P379373 | NM_145381 | Lactb2    | 212442 | lactamase, beta 2                                                                  | -5.20  | 0.19 | 0.00 |
| A_52_P672532 | NM_183251 | 1810020D1 | 166273 | RIKEN cDNA 1810020D17 gene                                                         | -6.19  | 0.19 | 0.00 |
| A_51_P136337 | NM_176963 | Galm      | 319625 | galactose mutarotase                                                               | -6.09  | 0.19 | 0.00 |
| A_51_P422893 | NM_029398 | Tmem14a   | 75712  | transmembrane protein 14A                                                          | -5.45  | 0.19 | 0.00 |
| A_51_P512072 | NM_008525 | Alad      | 17025  | aminolevulinatase, delta-, dehydratase                                             | -5.81  | 0.19 | 0.00 |
| A_51_P466180 | NM_010299 | Gm2a      | 14667  | GM2 ganglioside activator protein                                                  | -8.13  | 0.19 | 0.00 |
| A_51_P124285 | NM_027280 | Nkd1      | 93960  | naked cuticle 1 homolog (Drosophila)                                               | -7.86  | 0.19 | 0.00 |
| A_51_P111335 | NM_001013 | Akr1c19   | 432720 | aldo-keto reductase family 1, member C19                                           | -6.96  | 0.19 | 0.00 |
| A_52_P183368 | NM_011535 | Tbx3      | 21386  | T-box 3                                                                            | -5.40  | 0.19 | 0.00 |
| A_51_P403477 | NM_007860 | Dio1      | 13370  | deiodinase, iodothyronine, type I                                                  | -4.56  | 0.19 | 0.00 |

|              |           |          |        |                                                                             |        |      |      |
|--------------|-----------|----------|--------|-----------------------------------------------------------------------------|--------|------|------|
| A_51_P469724 | NM_053229 | V1rb8    | 113856 | vomer nasal 1 receptor, B8                                                  | -6.07  | 0.19 | 0.00 |
| A_51_P341918 | NM_009366 | Tsc22d1  | 21807  | TSC22 domain family, member 1                                               | -7.14  | 0.19 | 0.00 |
| A_51_P155638 | NM_027987 | Cd300lg  | 52685  | CD300 antigen like family member G                                          | -16.91 | 0.19 | 0.00 |
| A_51_P310850 | AK084512  | Plekha6  | 240753 | pleckstrin homology domain containing, family A member 6                    | -5.31  | 0.19 | 0.00 |
| A_51_P229536 | NM_020282 | Nqo2     | 18105  | NAD(P)H dehydrogenase, quinone 2                                            | -7.62  | 0.19 | 0.00 |
| A_51_P219266 | NM_027902 | Tmprss6  | 71753  | transmembrane serine protease 6                                             | -8.11  | 0.19 | 0.00 |
| A_51_P196663 | XM_898059 | NA       | NA     | NA                                                                          | -6.75  | 0.19 | 0.00 |
| A_51_P418725 | NM_024413 | Plekhf1  | 72287  | pleckstrin homology domain containing, family F (with FYVE domain) member 1 | -6.85  | 0.19 | 0.00 |
| A_51_P450140 | NM_009993 | Cyp1a2   | 13077  | cytochrome P450, family 1, subfamily a, polypeptide 2                       | -6.06  | 0.18 | 0.00 |
| A_51_P302856 | NM_053215 | Ugt2b37  | 112417 | UDP glucuronosyltransferase 2 family, polypeptide B37                       | -6.27  | 0.18 | 0.00 |
| A_52_P664044 | CN524910  | NA       | NA     | NA                                                                          | -7.55  | 0.18 | 0.00 |
| A_51_P145631 | AK158571  | Svip     | 75744  | small VCP/p97-interacting protein                                           | -7.21  | 0.18 | 0.00 |
| A_52_P236448 | NM_033217 | Ngfr     | 18053  | nerve growth factor receptor (TNFR superfamily, member 16)                  | -7.11  | 0.18 | 0.00 |
| A_52_P514352 | NM_021542 | Kcnk5    | 16529  | potassium channel, subfamily K, member 5                                    | -7.38  | 0.18 | 0.00 |
| A_51_P404193 | NM_022435 | Sp5      | 64406  | trans-acting transcription factor 5                                         | -7.36  | 0.18 | 0.00 |
| A_51_P289836 | NM_022880 | Slc29a1  | 63959  | solute carrier family 29 (nucleoside transporters), member 1                | -6.25  | 0.18 | 0.00 |
| A_52_P589591 | NM_015810 | Polg2    | 50776  | polymerase (DNA directed), gamma 2, accessory subunit                       | -7.48  | 0.18 | 0.00 |
| A_51_P120027 | AK004863  | Adh6-ps1 | 71749  | alcohol dehydrogenase 6 (class V), pseudogene 1                             | -4.98  | 0.18 | 0.00 |
| A_52_P298002 | NM_008102 | Gch1     | 14528  | GTP cyclohydrolase 1                                                        | -6.33  | 0.18 | 0.00 |
| A_51_P213334 | NM_144919 | Hdac11   | 232232 | histone deacetylase 11                                                      | -10.07 | 0.18 | 0.00 |
| A_51_P189814 | NM_013805 | Cldn5    | 12741  | claudin 5                                                                   | -10.74 | 0.18 | 0.00 |
| A_51_P358872 | NM_174853 | Disc1    | 244667 | disrupted in schizophrenia 1                                                | -5.13  | 0.18 | 0.00 |
| A_52_P571290 | NM_026988 | Ptms     | 69202  | parathyrosin                                                                | -7.77  | 0.18 | 0.00 |
| A_51_P144160 | NM_173422 | Colec10  | 239447 | collectin sub-family member 10                                              | -5.34  | 0.18 | 0.00 |
| A_51_P256384 | NM_009723 | Atp2b2   | 11941  | ATPase, Ca <sup>++</sup> transporting, plasma membrane 2                    | -12.66 | 0.18 | 0.00 |
| A_51_P429366 | NM_019479 | Hes6     | 55927  | hairy and enhancer of split 6 (Drosophila)                                  | -6.13  | 0.18 | 0.00 |
| A_51_P463452 | NM_007981 | Acsl1    | 14081  | acyl-CoA synthetase long-chain family member 1                              | -6.02  | 0.18 | 0.00 |

|              |           |          |        |                                                                                |        |      |      |
|--------------|-----------|----------|--------|--------------------------------------------------------------------------------|--------|------|------|
| A_51_P385086 | NM_009379 | Thpo     | 21832  | thrombopoietin                                                                 | -5.49  | 0.18 | 0.00 |
| A_52_P578922 | AK159899  | Hmgcr    | 15357  | 3-hydroxy-3-methylglutaryl-Coenzyme A reductase                                | -5.30  | 0.18 | 0.00 |
| A_51_P377154 | NM_009997 | Cyp2a4   | 13086  | cytochrome P450, family 2, subfamily a, polypeptide 4                          | -4.01  | 0.18 | 0.00 |
| A_51_P249909 | NM_010702 | Lect2    | 16841  | leukocyte cell-derived chemotaxin 2                                            | -10.20 | 0.18 | 0.00 |
| A_51_P515446 | NM_018887 | Cyp39a1  | 56050  | cytochrome P450, family 39, subfamily a, polypeptide 1                         | -7.68  | 0.18 | 0.00 |
| A_52_P276397 | NM_009001 | Rab3a    | 19339  | RAB3A, member RAS oncogene family                                              | -6.65  | 0.18 | 0.00 |
| A_51_P235604 | NM_023160 | Cml1     | 66116  | camello-like 1                                                                 | -8.65  | 0.18 | 0.00 |
| A_51_P363905 | NM_025877 | Slc25a23 | 66972  | solute carrier family 25 (mitochondrial carrier; phosphate carrier), member 23 | -7.53  | 0.18 | 0.00 |
| A_52_P369776 | BC024893  | Otc      | 18416  | ornithine transcarbamylase                                                     | -7.46  | 0.18 | 0.00 |
| A_52_P740427 | XM_890672 | NA       | NA     | NA                                                                             | -4.26  | 0.18 | 0.00 |
| A_51_P205385 | NM_009474 | Uox      | 22262  | urate oxidase                                                                  | -5.82  | 0.18 | 0.00 |
| A_51_P430585 | NM_026740 | Slc46a1  | 52466  | solute carrier family 46, member 1                                             | -6.28  | 0.18 | 0.00 |
| A_52_P145349 | NM_172656 | Stradb   | 227154 | STE20-related kinase adaptor beta                                              | -8.68  | 0.18 | 0.00 |
| A_51_P334444 | XM_131166 | NA       | NA     | NA                                                                             | -8.17  | 0.18 | 0.00 |
| A_52_P585104 | NM_010219 | Fkbp4    | 14228  | FK506 binding protein 4                                                        | -6.40  | 0.18 | 0.00 |
| A_51_P111513 | NA        | NA       | NA     | NA                                                                             | -6.09  | 0.18 | 0.00 |
| A_51_P206551 | NM_019878 | Sult1b1  | 56362  | sulfotransferase family 1B, member 1                                           | -7.42  | 0.18 | 0.00 |
| A_51_P504214 | NM_018832 | Magix    | 54634  | MAGI family member, X-linked                                                   | -11.31 | 0.18 | 0.00 |
| A_52_P100252 | NM_007988 | Fasn     | 14104  | fatty acid synthase                                                            | -4.46  | 0.17 | 0.00 |
| A_51_P109258 | NM_138686 | Cys1     | 12879  | cystin 1                                                                       | -7.04  | 0.17 | 0.00 |
| A_52_P537827 | AK142559  | Wdr72    | 546144 | WD repeat domain 72                                                            | -4.75  | 0.17 | 0.00 |
| A_51_P150145 | AK077046  | NA       | NA     | NA                                                                             | -5.83  | 0.17 | 0.00 |
| A_51_P179878 | AK134698  | Slc1a2   | 20511  | solute carrier family 1 (glial high affinity glutamate transporter), member 2  | -5.70  | 0.17 | 0.00 |
| A_52_P267505 | NM_013851 | Abca8b   | 27404  | ATP-binding cassette, sub-family A (ABC1), member 8b                           | -6.75  | 0.17 | 0.00 |
| A_51_P327869 | NM_011199 | Pth1r    | 19228  | parathyroid hormone 1 receptor                                                 | -7.74  | 0.17 | 0.00 |
| A_52_P356068 | NM_025834 | Proz     | 66901  | protein Z, vitamin K-dependent plasma glycoprotein                             | -13.69 | 0.17 | 0.00 |

|              |           |          |        |                                                                                                                                 |        |      |      |
|--------------|-----------|----------|--------|---------------------------------------------------------------------------------------------------------------------------------|--------|------|------|
|              |           |          |        | 4-nitrophenylphosphatase domain and non-neuronal                                                                                |        |      |      |
| A_51_P214516 | NM_008698 | Nipsnap1 | 18082  | SNAP25-like protein homolog 1 ( <i>C. elegans</i> )                                                                             | -7.82  | 0.17 | 0.00 |
| A_51_P447248 | NM_175105 | Aqp11    | 66333  | aquaporin 11                                                                                                                    | -6.00  | 0.17 | 0.00 |
| A_51_P452779 | NM_133198 | Pygl     | 110095 | liver glycogen phosphorylase                                                                                                    | -13.80 | 0.17 | 0.00 |
| A_52_P509297 | NM_001038 | Mapt     | 17762  | microtubule-associated protein tau                                                                                              | -7.02  | 0.17 | 0.00 |
| A_51_P234864 | NM_178639 | Sfxn5    | 94282  | sideroflexin 5                                                                                                                  | -8.57  | 0.17 | 0.00 |
| A_51_P327585 | NM_026764 | Gstm4    | 14865  | glutathione S-transferase, mu 4                                                                                                 | -8.74  | 0.17 | 0.00 |
| A_52_P197402 | BC072607  | Tbc1d30  | 74694  | TBC1 domain family, member 30                                                                                                   | -8.88  | 0.17 | 0.00 |
| A_52_P478339 | NM_026527 | Chac2    | 68044  | ChaC, cation transport regulator homolog 2 ( <i>E. coli</i> )                                                                   | -6.63  | 0.17 | 0.00 |
| A_51_P234407 | NM_013769 | Tjp3     | 27375  | tight junction protein 3                                                                                                        | -6.69  | 0.17 | 0.00 |
| A_51_P309917 | NM_001001 | Itga8    | 241226 | integrin alpha 8                                                                                                                | -10.84 | 0.17 | 0.00 |
| A_51_P227202 | NA        | NA       | NA     | NA                                                                                                                              | -6.09  | 0.17 | 0.00 |
| A_51_P420726 | NM_028372 | Mblac2   | 72852  | metallo-beta-lactamase domain containing 2<br>elongation of very long chain fatty acids (FEN1/Elo2,<br>SUR4/Elo3, yeast)-like 2 | -7.31  | 0.17 | 0.00 |
| A_51_P292582 | NM_019423 | Elov12   | 54326  |                                                                                                                                 | -5.44  | 0.17 | 0.00 |
| A_51_P499854 | NM_010284 | Ghr      | 14600  | growth hormone receptor                                                                                                         | -8.35  | 0.17 | 0.00 |
| A_51_P333111 | NM_009676 | Aox1     | 11761  | aldehyde oxidase 1                                                                                                              | -9.25  | 0.17 | 0.00 |
| A_51_P336952 | NM_030004 | Cryl1    | 68631  | crystallin, lambda 1                                                                                                            | -12.29 | 0.17 | 0.00 |
| A_51_P307168 | BC060266  | NA       | NA     | NA                                                                                                                              | -7.58  | 0.17 | 0.00 |
| A_51_P121915 | NM_145424 | BC089597 | 216454 | cDNA sequence BC089597                                                                                                          | -5.96  | 0.17 | 0.00 |
| A_51_P464175 | NM_007437 | Aldh3a2  | 11671  | aldehyde dehydrogenase family 3, subfamily A2                                                                                   | -7.70  | 0.17 | 0.00 |
| A_51_P205326 | NM_177743 | Fam198a  | 245050 | family with sequence similarity 198, member A                                                                                   | -8.15  | 0.17 | 0.00 |
| A_52_P476560 | NM_145853 | Tpcn1    | 252972 | two pore channel 1                                                                                                              | -6.98  | 0.17 | 0.00 |
| A_51_P165111 | NM_013797 | Slco1a1  | 28248  | solute carrier organic anion transporter family, member<br>1a1                                                                  | -5.52  | 0.17 | 0.00 |
| A_51_P183703 | NA        | NA       | NA     | NA                                                                                                                              | -6.43  | 0.17 | 0.00 |
| A_51_P145020 | NM_146245 | Lrit1    | 239037 | leucine-rich repeat, immunoglobulin-like and<br>transmembrane domains 1                                                         | -10.32 | 0.17 | 0.00 |
| A_51_P468231 | NM_011211 | Ptprd    | 19266  | protein tyrosine phosphatase, receptor type, D                                                                                  | -9.62  | 0.17 | 0.00 |
| A_51_P211403 | NM_008101 | Gcgr     | 14527  | glucagon receptor                                                                                                               | -8.26  | 0.17 | 0.00 |
| A_51_P215438 | NM_011172 | Prodh    | 19125  | proline dehydrogenase                                                                                                           | -7.57  | 0.16 | 0.00 |
| A_52_P159077 | NM_011734 | Siae     | 22619  | sialic acid acetyltransferase                                                                                                   | -6.15  | 0.16 | 0.00 |

|              |           |           |        |                                                                                          |        |      |      |
|--------------|-----------|-----------|--------|------------------------------------------------------------------------------------------|--------|------|------|
| A_51_P116039 | NM_008256 | Hmgcs2    | 15360  | 3-hydroxy-3-methylglutaryl-Coenzyme A synthase 2                                         | -4.55  | 0.16 | 0.00 |
| A_52_P486260 | NM_054077 | Prelp     | 116847 | proline arginine-rich end leucine-rich repeat                                            | -8.55  | 0.16 | 0.00 |
| A_51_P180613 | NM_153783 | Paox      | 212503 | polyamine oxidase (exo-N4-amino)                                                         | -6.87  | 0.16 | 0.00 |
| A_51_P180617 | NM_153783 | Paox      | 212503 | polyamine oxidase (exo-N4-amino)                                                         | -8.42  | 0.16 | 0.00 |
| A_51_P186703 | AK090129  | Fbln5     | 23876  | fibulin 5                                                                                | -7.43  | 0.16 | 0.00 |
| A_51_P383194 | NM_008804 | Pde9a     | 18585  | phosphodiesterase 9A                                                                     | -10.04 | 0.16 | 0.00 |
| A_52_P680827 | NM_172961 | Abat      | 268860 | 4-aminobutyrate aminotransferase                                                         | -8.11  | 0.16 | 0.00 |
| A_52_P356343 | NM_153574 | Fam13a    | 58909  | family with sequence similarity 13, member A                                             | -7.34  | 0.16 | 0.00 |
| A_52_P485007 | NM_007379 | Abca2     | 11305  | ATP-binding cassette, sub-family A (ABC1), member 2                                      | -11.46 | 0.16 | 0.00 |
| A_52_P625249 | NM_010001 | Cyp2c37   | 13096  | cytochrome P450, family 2, subfamily c, polypeptide 37                                   | -4.76  | 0.16 | 0.00 |
| A_51_P129895 | NM_007744 | Comt1     | 12846  | catechol-O-methyltransferase 1                                                           | -7.42  | 0.16 | 0.00 |
| A_52_P154580 | NM_206537 | Cyp2c54   | 404195 | cytochrome P450, family 2, subfamily c, polypeptide 54                                   | -4.92  | 0.16 | 0.00 |
| A_51_P332141 | NM_009900 | Clcn2     | 12724  | chloride channel 2                                                                       | -6.83  | 0.16 | 0.00 |
| A_51_P114005 | NM_026672 | Gstm7     | 68312  | glutathione S-transferase, mu 7                                                          | -11.34 | 0.16 | 0.00 |
| A_51_P432924 | NM_153598 | Ugt2b34   | 100727 | UDP glucuronosyltransferase 2 family, polypeptide B34                                    | -5.69  | 0.16 | 0.00 |
| A_51_P124550 | NM_139292 | Reep6     | 70335  | receptor accessory protein 6                                                             | -5.06  | 0.16 | 0.00 |
| A_51_P428555 | NM_007409 | Adh1      | 11522  | alcohol dehydrogenase 1 (class I)<br>leucine rich repeat containing G protein coupled    | -4.93  | 0.16 | 0.00 |
| A_51_P218091 | NM_010195 | Lgr5      | 14160  | receptor 5                                                                               | -12.11 | 0.16 | 0.00 |
| A_52_P327156 | NM_197983 | 0610008F0 | 68314  | RIKEN cDNA 0610008F07 gene                                                               | -8.44  | 0.16 | 0.00 |
| A_52_P644613 | NM_019878 | Sult1b1   | 56362  | sulfotransferase family 1B, member 1                                                     | -10.86 | 0.16 | 0.00 |
| A_51_P446570 | NM_130452 | Bbox1     | 170442 | butyrobetaine (gamma), 2-oxoglutarate dioxygenase 1<br>(gamma-butyrobetaine hydroxylase) | -6.45  | 0.16 | 0.00 |
| A_52_P223704 | NM_010173 | Faah      | 14073  | fatty acid amide hydrolase                                                               | -8.82  | 0.16 | 0.00 |
| A_52_P617636 | NM_010636 | Klf12     | 16597  | Kruppel-like factor 12                                                                   | -9.73  | 0.16 | 0.00 |
| A_52_P540219 | NM_011594 | Timp2     | 21858  | tissue inhibitor of metalloproteinase 2                                                  | -6.41  | 0.16 | 0.00 |
| A_52_P508991 | NM_010231 | Fmo1      | 14261  | flavin containing monooxygenase 1                                                        | -5.68  | 0.16 | 0.00 |
| A_51_P473219 | NM_011734 | Siae      | 22619  | sialic acid acetyltransferase                                                            | -6.72  | 0.16 | 0.00 |

|              |           |           |        |                                                                                |        |      |      |
|--------------|-----------|-----------|--------|--------------------------------------------------------------------------------|--------|------|------|
| A_52_P941407 | AV094648  | NA        | NA     | NA                                                                             | -8.94  | 0.15 | 0.00 |
| A_51_P291713 | NM_134094 | Ncald     | 52589  | neurocalcin delta                                                              | -7.23  | 0.15 | 0.00 |
| A_51_P110471 | NM_026993 | Ddah1     | 69219  | dimethylarginine dimethylaminohydrolase 1                                      | -7.94  | 0.15 | 0.00 |
| A_51_P439248 | NM_008625 | Mrc1      | 17533  | mannose receptor, C type 1                                                     | -7.96  | 0.15 | 0.00 |
| A_51_P142450 | NM_027865 | Tmem25    | 71687  | transmembrane protein 25                                                       | -6.40  | 0.15 | 0.00 |
| A_51_P211171 | NA        | NA        | NA     | NA                                                                             | -7.70  | 0.15 | 0.00 |
| A_52_P89335  | NM_146260 | Tmie      | 20776  | transmembrane inner ear                                                        | -5.16  | 0.15 | 0.00 |
| A_51_P180891 | NM_028341 | Ttc39c    | 72747  | tetratricopeptide repeat domain 39C                                            | -12.91 | 0.15 | 0.00 |
| A_52_P48762  | NM_001039 | Lin7a     | 108030 | lin-7 homolog A (C. elegans)                                                   | -10.39 | 0.15 | 0.00 |
| A_52_P118560 | NM_027552 | Kynu      | 70789  | kynureninase (L-kynurenine hydrolase)                                          | -7.45  | 0.15 | 0.00 |
| A_51_P329949 | NM_153574 | Fam13a    | 58909  | family with sequence similarity 13, member A                                   | -6.40  | 0.15 | 0.00 |
| A_51_P442759 | NM_172520 | Arhgef19  | 213649 | Rho guanine nucleotide exchange factor (GEF) 19                                | -7.21  | 0.15 | 0.00 |
| A_51_P324633 | NM_007703 | Elov13    | 12686  | elongation of very long chain fatty acids (FEN1/Elo2, SUR4/Elo3, yeast)-like 3 | -6.00  | 0.15 | 0.00 |
| A_52_P330950 | NM_174847 | C2cd2     | 207781 | C2 calcium-dependent domain containing 2                                       | -6.92  | 0.15 | 0.00 |
| A_51_P431018 | NM_019414 | Selenbp2  | 20342  | selenium binding protein 2                                                     | -4.70  | 0.15 | 0.00 |
| A_51_P198675 | NM_138951 | Ttc36     | 192653 | tetratricopeptide repeat domain 36                                             | -11.28 | 0.15 | 0.00 |
| A_51_P386660 | NM_010173 | Faah      | 14073  | fatty acid amide hydrolase                                                     | -11.80 | 0.15 | 0.00 |
| A_51_P455090 | AK028683  | Cps1      | 227231 | carbamoyl-phosphate synthetase 1                                               | -6.53  | 0.15 | 0.00 |
| A_51_P214209 | NM_026282 | Spc24     | 67629  | SPC24, NDC80 kinetochore complex component, homolog (S. cerevisiae)            | -9.30  | 0.15 | 0.00 |
| A_51_P304109 | NM_010003 | Cyp2c39   | 13098  | cytochrome P450, family 2, subfamily c, polypeptide 39                         | -5.78  | 0.15 | 0.00 |
| A_51_P468482 | NM_028093 | Entpd8    | 72090  | ectonucleoside triphosphate diphosphohydrolase 8                               | -6.49  | 0.15 | 0.00 |
| A_52_P655206 | AK050258  | NA        | NA     | NA                                                                             | -9.08  | 0.15 | 0.00 |
| A_52_P481279 | NM_001033 | Gm1060    | 381738 | predicted gene 1060                                                            | -7.80  | 0.15 | 0.00 |
| A_51_P399305 | NM_013869 | Tnfrsf19  | 29820  | tumor necrosis factor receptor superfamily, member 19                          | -11.14 | 0.15 | 0.00 |
| A_52_P399204 | AK090143  | Amdhd1    | 71761  | amidohydrolase domain containing 1                                             | -7.50  | 0.15 | 0.00 |
| A_52_P582251 | AK006209  | 1700021J0 | 72235  | RIKEN cDNA 1700021J08 gene                                                     | -7.04  | 0.15 | 0.00 |
| A_51_P271865 | NM_016751 | Clec4f    | 51811  | C-type lectin domain family 4, member f                                        | -8.46  | 0.15 | 0.00 |
| A_51_P245503 | NM_152811 | Ugt2b1    | 71773  | UDP glucuronosyltransferase 2 family, polypeptide B1                           | -7.05  | 0.14 | 0.00 |



|              |           |            |        |                                                                     |        |      |      |
|--------------|-----------|------------|--------|---------------------------------------------------------------------|--------|------|------|
| A_51_P114002 | AK002213  | Gstm7      | 68312  | glutathione S-transferase, mu 7                                     | -10.54 | 0.14 | 0.00 |
| A_51_P288341 | NM_008277 | Hpd        | 15445  | 4-hydroxyphenylpyruvic acid dioxygenase                             | -5.50  | 0.14 | 0.00 |
| A_52_P477785 | NM_177016 | Slc17a4    | 319848 | solute carrier family 17 (sodium phosphate), member 4               | -9.06  | 0.14 | 0.00 |
| A_51_P299805 | NM_027872 | Slc46a3    | 71706  | solute carrier family 46, member 3                                  | -9.53  | 0.14 | 0.00 |
| A_52_P92037  | NM_009474 | Uox        | 22262  | urate oxidase                                                       | -6.34  | 0.14 | 0.00 |
| A_52_P164136 | NM_001042 | Arrdc3     | 105171 | arrestin domain containing 3                                        | -5.84  | 0.14 | 0.00 |
| A_51_P424990 | NM_173427 | Klhdc7a    | 242721 | kelch domain containing 7A                                          | -5.94  | 0.14 | 0.00 |
| A_51_P468005 | NM_010232 | Fmo5       | 14263  | flavin containing monooxygenase 5                                   | -5.90  | 0.14 | 0.00 |
| A_51_P200477 | NM_008300 | Hspa4      | 15525  | heat shock protein 4                                                | -5.19  | 0.14 | 0.00 |
| A_51_P384230 | NM_013731 | Sgk2       | 27219  | serum/glucocorticoid regulated kinase 2                             | -5.33  | 0.14 | 0.00 |
| A_51_P137336 | NM_009864 | Cdh1       | 12550  | cadherin 1                                                          | -8.12  | 0.14 | 0.00 |
| A_51_P157083 | NM_008086 | Gas1       | 14451  | growth arrest specific 1                                            | -6.14  | 0.14 | 0.00 |
| A_51_P215475 | NM_029928 | Ptpnb      | 19263  | protein tyrosine phosphatase, receptor type, B                      | -9.78  | 0.14 | 0.00 |
| A_51_P506513 | NM_024236 | Qdpr       | 110391 | quinoid dihydropteridine reductase                                  | -12.96 | 0.14 | 0.00 |
| A_51_P392005 | NM_007592 | Car8       | 12319  | carbonic anhydrase 8                                                | -6.61  | 0.14 | 0.00 |
| A_51_P488554 | NM_026543 | 3010026O09 | 68067  | RIKEN cDNA 3010026O09 gene                                          | -8.99  | 0.14 | 0.00 |
| A_51_P232399 | NM_027857 | Acy3       | 71670  | aspartoacylase (aminoacylase) 3                                     | -8.84  | 0.14 | 0.00 |
| A_51_P481679 | NM_013913 | Angptl3    | 30924  | angiopoietin-like 3                                                 | -8.10  | 0.14 | 0.00 |
| A_51_P372141 | NM_001039 | Pnkd       | 56695  | paroxysmal nonkinesinogenic dyskinesia                              | -6.11  | 0.14 | 0.00 |
| A_52_P284889 | NM_008860 | Prkcz      | 18762  | protein kinase C, zeta                                              | -6.62  | 0.14 | 0.00 |
| A_51_P432460 | NM_026731 | Ppp1r14a   | 68458  | protein phosphatase 1, regulatory (inhibitor) subunit 14A           | -6.38  | 0.14 | 0.00 |
| A_51_P106294 | NM_010292 | Gck        | 103988 | glucokinase                                                         | -9.03  | 0.14 | 0.00 |
| A_51_P480427 | NM_146718 | Olf430     | 258713 | olfactory receptor 430                                              | -7.36  | 0.14 | 0.00 |
| A_52_P629895 | NM_007409 | Adh1       | 11522  | alcohol dehydrogenase 1 (class I)                                   | -5.52  | 0.14 | 0.00 |
| A_51_P327874 | NM_011199 | Pth1r      | 19228  | parathyroid hormone 1 receptor                                      | -9.12  | 0.14 | 0.00 |
| A_51_P369998 | NM_172951 | Sntg2      | 268534 | syntrophin, gamma 2                                                 | -6.88  | 0.13 | 0.00 |
| A_51_P514405 | NM_019741 | Slc2a5     | 56485  | solute carrier family 2 (facilitated glucose transporter), member 5 | -6.78  | 0.13 | 0.00 |
| A_52_P103929 | NM_009306 | Syt1       | 20979  | synaptotagmin I                                                     | -14.65 | 0.13 | 0.00 |
| A_51_P168133 | NM_022026 | Aqp9       | 64008  | aquaporin 9                                                         | -5.32  | 0.13 | 0.00 |
| A_51_P291749 | NM_023523 | Pecr       | 111175 | peroxisomal trans-2-enoyl-CoA reductase                             | -7.60  | 0.13 | 0.00 |
| A_52_P94495  | AK050059  | Prkd3      | 75292  | protein kinase D3                                                   | -9.17  | 0.13 | 0.00 |

|              |           |           |        |                                                                                                                                     |        |      |      |
|--------------|-----------|-----------|--------|-------------------------------------------------------------------------------------------------------------------------------------|--------|------|------|
| A_52_P602987 | BC096586  | Prlr      | 19116  | prolactin receptor                                                                                                                  | -7.83  | 0.13 | 0.00 |
| A_52_P127325 | NM_178885 | AI182371  | 98870  | expressed sequence AI182371                                                                                                         | -11.48 | 0.13 | 0.00 |
| A_52_P627761 | NM_023154 | Ethe1     | 66071  | ethylmalonic encephalopathy 1                                                                                                       | -6.30  | 0.13 | 0.00 |
| A_51_P193490 | NM_145564 | Fbxo21    | 231670 | F-box protein 21                                                                                                                    | -9.07  | 0.13 | 0.00 |
| A_52_P515677 | AK050325  | NA        | NA     | NA                                                                                                                                  | -4.21  | 0.13 | 0.00 |
| A_51_P465292 | NM_080462 | Hnmt      | 140483 | histamine N-methyltransferase                                                                                                       | -10.65 | 0.13 | 0.00 |
| A_51_P308298 | BC055439  | Myl9      | 98932  | myosin, light polypeptide 9, regulatory                                                                                             | -4.39  | 0.13 | 0.00 |
| A_52_P361391 | NM_146640 | Olf1153   | 258633 | olfactory receptor 1153                                                                                                             | -8.33  | 0.13 | 0.00 |
| A_52_P120055 | NM_009171 | Shmt1     | 20425  | serine hydroxymethyltransferase 1 (soluble)                                                                                         | -7.73  | 0.13 | 0.00 |
| A_51_P178772 | NM_144930 | AU018778  | 234564 | expressed sequence AU018778                                                                                                         | -5.31  | 0.13 | 0.00 |
| A_52_P282279 | NM_138745 | Mthfd1    | 108156 | methylenetetrahydrofolate dehydrogenase (NADP+ dependent), methenyltetrahydrofolate cyclohydrolase, formyltetrahydrofolate synthase | -7.35  | 0.13 | 0.00 |
| A_51_P392928 | NM_138745 | Mthfd1    | 108156 | methylenetetrahydrofolate dehydrogenase (NADP+ dependent), methenyltetrahydrofolate cyclohydrolase, formyltetrahydrofolate synthase | -6.97  | 0.13 | 0.00 |
| A_52_P40293  | NM_013547 | Hgd       | 15233  | homogentisate 1, 2-dioxygenase                                                                                                      | -9.22  | 0.13 | 0.00 |
| A_51_P103144 | AY195869  | Slco1a1   | 28248  | solute carrier organic anion transporter family, member 1a1                                                                         | -6.53  | 0.13 | 0.00 |
| A_52_P679769 | NM_009804 | Cat       | 12359  | catalase                                                                                                                            | -6.27  | 0.13 | 0.00 |
| A_51_P491835 | AK013507  | 2900009J2 | 72876  | RIKEN cDNA 2900009J20 gene                                                                                                          | -10.58 | 0.13 | 0.00 |
| A_51_P328622 | NM_027249 | Tlcd2     | 380712 | TLC domain containing 2                                                                                                             | -10.66 | 0.13 | 0.00 |
| A_51_P316553 | NM_010612 | Kdr       | 16542  | kinase insert domain protein receptor                                                                                               | -7.33  | 0.13 | 0.00 |
| A_51_P180492 | NM_016974 | Dbp       | 13170  | D site albumin promoter binding protein                                                                                             | -6.64  | 0.13 | 0.00 |
| A_51_P335569 | NM_030687 | Slco1a4   | 28250  | solute carrier organic anion transporter family, member 1a4                                                                         | -6.86  | 0.13 | 0.00 |
| A_52_P460767 | NM_010232 | Fmo5      | 14263  | flavin containing monooxygenase 5                                                                                                   | -6.49  | 0.12 | 0.00 |
| A_51_P169087 | NM_001033 | Gls2      | 216456 | glutaminase 2 (liver, mitochondrial)                                                                                                | -10.08 | 0.12 | 0.00 |
| A_51_P194149 | NM_013697 | Ttr       | 22139  | transthyretin                                                                                                                       | -8.12  | 0.12 | 0.00 |
| A_51_P376347 | NM_013546 | Hebp1     | 15199  | heme binding protein 1                                                                                                              | -9.05  | 0.12 | 0.00 |
| A_51_P180213 | NM_001013 | Akr1c19   | 432720 | aldo-keto reductase family 1, member C19                                                                                            | -11.81 | 0.12 | 0.00 |
| A_52_P80440  | NM_022026 | Aqp9      | 64008  | aquaporin 9                                                                                                                         | -5.50  | 0.12 | 0.00 |
| A_51_P395856 | NM_144856 | Slc22a7   | 108114 | solute carrier family 22 (organic anion transporter), member 7                                                                      | -7.80  | 0.12 | 0.00 |

|              |                     |        |                                                          |        |      |      |
|--------------|---------------------|--------|----------------------------------------------------------|--------|------|------|
| A_51_P185175 | NM_010219 Fkbp4     | 14228  | FK506 binding protein 4                                  | -6.95  | 0.12 | 0.00 |
| A_52_P579352 | NM_013584 Lifr      | 16880  | leukemia inhibitory factor receptor                      | -8.18  | 0.12 | 0.00 |
| A_51_P273609 | NM_146125 Itpka     | 228550 | inositol 1,4,5-trisphosphate 3-kinase A                  | -8.93  | 0.12 | 0.00 |
| A_51_P499816 | NM_026701 Pbld      | 68371  | phenazine biosynthesis-like protein domain containing    | -4.82  | 0.12 | 0.00 |
| A_51_P469789 | NM_016702 Agxt      | 11611  | alanine-glyoxylate aminotransferase                      | -14.48 | 0.12 | 0.00 |
| A_51_P222566 | NM_025572 2610528J1 | 66451  | RIKEN cDNA 2610528J11 gene                               | -7.72  | 0.12 | 0.00 |
| A_52_P448006 | NM_023175 Nit2      | 52633  | nitrilase family, member 2                               | -10.15 | 0.12 | 0.00 |
| A_51_P238094 | NM_024444 Cyp4f18   | 72054  | cytochrome P450, family 4, subfamily f, polypeptide 18   | -11.06 | 0.12 | 0.00 |
| A_52_P319199 | NM_145154 Angptl6   | 70726  | angiopoietin-like 6                                      | -9.94  | 0.12 | 0.00 |
| A_51_P322220 | NM_029752 Bri3bp    | 76809  | Bri3 binding protein                                     | -7.10  | 0.12 | 0.00 |
| A_51_P266618 | NM_010012 Cyp8b1    | 13124  | cytochrome P450, family 8, subfamily b, polypeptide 1    | -5.80  | 0.12 | 0.00 |
| A_52_P407171 | NM_175391 Apol7c    | 108956 | apolipoprotein L 7c                                      | -12.53 | 0.11 | 0.00 |
| A_51_P406165 | NM_030069 Fam55b    | 78252  | family with sequence similarity 55, member B             | -13.39 | 0.11 | 0.00 |
| A_51_P467971 | NM_146005 Ank3      | 11735  | ankyrin 3, epithelial                                    | -9.59  | 0.11 | 0.00 |
| A_52_P30451  | NM_016854 Ppp1r3c   | 53412  | protein phosphatase 1, regulatory (inhibitor) subunit 3C | -5.75  | 0.11 | 0.00 |
| A_52_P639048 | NM_007416 Adra1b    | 11548  | adrenergic receptor, alpha 1b                            | -7.33  | 0.11 | 0.00 |
| A_51_P241995 | NM_016919 Col5a3    | 53867  | collagen, type V, alpha 3                                | -7.29  | 0.11 | 0.00 |
| A_51_P351273 | NM_011542 Tcea3     | 21401  | transcription elongation factor A (SII), 3               | -6.55  | 0.11 | 0.00 |
| A_52_P136092 | NM_022026 Aqp9      | 64008  | aquaporin 9                                              | -4.57  | 0.11 | 0.00 |
| A_52_P360742 | NM_029419 Apol7a    | 75761  | apolipoprotein L 7a                                      | -12.10 | 0.11 | 0.00 |
| A_51_P512172 | AK010953 Tet1       | 52463  | tet oncogene 1                                           | -15.74 | 0.11 | 0.00 |
| A_51_P309920 | NM_001001: Itga8    | 241226 | integrin alpha 8                                         | -12.36 | 0.11 | 0.00 |
| A_51_P384515 | AK082385 Ido2       | 209176 | indoleamine 2,3-dioxygenase 2                            | -5.67  | 0.11 | 0.00 |
| A_52_P205695 | NM_027334 Mettl7a1  | 70152  | methyltransferase like 7A1                               | -11.81 | 0.11 | 0.00 |
| A_51_P360918 | NM_020578 Ehd3      | 57440  | EH-domain containing 3                                   | -8.85  | 0.11 | 0.00 |
| A_52_P531610 | AK030395 Agxt2l1    | 71760  | alanine-glyoxylate aminotransferase 2-like 1             | -7.27  | 0.11 | 0.00 |
| A_51_P431329 | NM_007606 Car3      | 12350  | carbonic anhydrase 3                                     | -5.67  | 0.11 | 0.00 |
| A_52_P219904 | NM_027827 Afmid     | 71562  | arylformamidase                                          | -9.31  | 0.11 | 0.00 |
| A_51_P424878 | NM_025582 2810405K0 | 66469  | RIKEN cDNA 2810405K02 gene                               | -5.33  | 0.11 | 0.00 |

|              |           |          |        |                                                                                                                  |        |      |      |
|--------------|-----------|----------|--------|------------------------------------------------------------------------------------------------------------------|--------|------|------|
| A_51_P489503 | BC025832  | Notum    | 77583  | notum pectinacylesterase homolog (Drosophila)                                                                    | -14.14 | 0.11 | 0.00 |
| A_51_P511927 | NM_026183 | Slc47a1  | 67473  | solute carrier family 47, member 1                                                                               | -10.38 | 0.11 | 0.00 |
| A_51_P117618 | NM_023154 | Ethe1    | 66071  | ethylmalonic encephalopathy 1                                                                                    | -8.43  | 0.11 | 0.00 |
| A_51_P131315 | NM_027997 | Serpina9 | 71907  | serine (or cysteine) peptidase inhibitor, clade A (alpha-1 antiproteinase, antitrypsin), member 9                | -7.58  | 0.11 | 0.00 |
| A_51_P453043 | NM_030210 | Aacs     | 78894  | acetoacetyl-CoA synthetase                                                                                       | -7.53  | 0.11 | 0.00 |
| A_51_P212682 | NM_027290 | Mcm10    | 70024  | minichromosome maintenance deficient 10 (S. cerevisiae)                                                          | -12.01 | 0.10 | 0.00 |
| A_52_P611787 | NM_026183 | Slc47a1  | 67473  | solute carrier family 47, member 1                                                                               | -10.29 | 0.10 | 0.00 |
| A_51_P410361 | NM_001039 | Lin7a    | 108030 | lin-7 homolog A (C. elegans)                                                                                     | -14.27 | 0.10 | 0.00 |
| A_52_P161297 | NM_011542 | Tcea3    | 21401  | transcription elongation factor A (SII), 3                                                                       | -6.62  | 0.10 | 0.00 |
| A_51_P196862 | AK090143  | Amdhd1   | 71761  | amidohydrolase domain containing 1                                                                               | -9.12  | 0.10 | 0.00 |
| A_51_P331003 | NM_011976 | Sema4g   | 26456  | sema domain, immunoglobulin domain (Ig), transmembrane domain (TM) and short cytoplasmic domain, (semaphorin) 4G | -8.18  | 0.10 | 0.00 |
| A_51_P268641 | AY566863  | A1cf     | 69865  | APOBEC1 complementation factor                                                                                   | -8.12  | 0.10 | 0.00 |
| A_51_P128834 | NM_177789 | Vsig4    | 278180 | V-set and immunoglobulin domain containing 4                                                                     | -9.44  | 0.10 | 0.00 |
| A_51_P502092 | BC024137  | BC024137 | 234757 | cDNA sequence BC024137                                                                                           | -5.49  | 0.10 | 0.00 |
| A_51_P259571 | NM_145154 | Angptl6  | 70726  | angiopoietin-like 6                                                                                              | -9.23  | 0.10 | 0.00 |
| A_51_P453909 | NM_007817 | Cyp2f2   | 13107  | cytochrome P450, family 2, subfamily f, polypeptide 2                                                            | -7.78  | 0.10 | 0.00 |
| A_51_P464394 | NM_031180 | Klb      | 83379  | klotho beta                                                                                                      | -8.46  | 0.10 | 0.00 |
| A_51_P263591 | NM_023792 | Pank1    | 75735  | pantothenate kinase 1                                                                                            | -7.49  | 0.10 | 0.00 |
| A_51_P350378 | NA        | NA       | NA     | NA                                                                                                               | -7.72  | 0.10 | 0.00 |
| A_51_P452768 | NM_022434 | Cyp4f14  | 64385  | cytochrome P450, family 4, subfamily f, polypeptide 14                                                           | -8.31  | 0.10 | 0.00 |
| A_51_P277088 | NM_008340 | Igfals   | 16005  | insulin-like growth factor binding protein, acid labile subunit                                                  | -9.71  | 0.10 | 0.00 |
| A_52_P859747 | AK050399  | Gm1381   | 384198 | predicted gene 1381                                                                                              | -4.76  | 0.10 | 0.00 |
| A_52_P626020 | XM_976628 | EG665393 | 665393 | predicted gene, EG665393                                                                                         | -9.37  | 0.10 | 0.00 |
| A_51_P270083 | NM_029631 | Abhd14b  | 76491  | abhydrolase domain containing 14b                                                                                | -6.87  | 0.10 | 0.00 |
| A_51_P290981 | NM_007824 | Cyp7a1   | 13122  | cytochrome P450, family 7, subfamily a, polypeptide 1                                                            | -9.44  | 0.10 | 0.00 |

|               |           |            |        |                                                                     |        |      |      |
|---------------|-----------|------------|--------|---------------------------------------------------------------------|--------|------|------|
| A_52_P625118  | NM_007592 | Car8       | 12319  | carbonic anhydrase 8                                                | -9.87  | 0.10 | 0.00 |
| A_52_P634607  | NA        | NA         | NA     | NA                                                                  | -9.17  | 0.10 | 0.00 |
| A_51_P489367  | NM_019792 | Cyp3a25    | 56388  | cytochrome P450, family 3, subfamily a, polypeptide 25              | -8.72  | 0.10 | 0.00 |
| A_52_P277654  | AK165090  | Pdk1       | 228026 | pyruvate dehydrogenase kinase, isoenzyme 1                          | -9.93  | 0.10 | 0.00 |
| A_51_P224013  | NM_009387 | Tk1        | 21877  | thymidine kinase 1                                                  | -9.70  | 0.10 | 0.00 |
| A_52_P590154  | NM_013786 | Hsd17b6    | 27400  | hydroxysteroid (17-beta) dehydrogenase 6                            | -6.78  | 0.10 | 0.00 |
| A_52_P1147453 | AK137645  | Fmo5       | 14263  | flavin containing monooxygenase 5                                   | -8.00  | 0.10 | 0.00 |
| A_52_P673499  | NM_009171 | Shmt1      | 20425  | serine hydroxymethyltransferase 1 (soluble)                         | -7.90  | 0.10 | 0.00 |
| A_52_P629748  | NM_175263 | Notum      | 77583  | notum pectinacetyltransferase homolog (Drosophila)                  | -21.70 | 0.09 | 0.00 |
| A_51_P510418  | NM_028270 | Aldh1b1    | 72535  | aldehyde dehydrogenase 1 family, member B1                          | -10.06 | 0.09 | 0.00 |
| A_51_P403578  | AK007907  | 1810059H2  | 69820  | RIKEN cDNA 1810059H22 gene                                          | -11.20 | 0.09 | 0.00 |
| A_51_P319289  | NM_027301 | Sdr9c7     | 70061  | 4short chain dehydrogenase/reductase family 9C, member 7            | -9.15  | 0.09 | 0.00 |
| A_52_P614777  | NM_032400 | Sucnr1     | 84112  | succinate receptor 1                                                | -9.89  | 0.09 | 0.00 |
| A_51_P389988  | NM_016917 | Slc40a1    | 53945  | solute carrier family 40 (iron-regulated transporter), member 1     | -5.81  | 0.09 | 0.00 |
| A_52_P380314  | NM_019792 | Cyp3a25    | 56388  | cytochrome P450, family 3, subfamily a, polypeptide 25              | -7.01  | 0.09 | 0.00 |
| A_52_P204331  | NM_178727 | D630039A03 | 242484 | RIKEN cDNA D630039A03 gene                                          | -10.64 | 0.09 | 0.00 |
| A_51_P205779  | NM_009690 | Cd5l       | 11801  | CD5 antigen-like                                                    | -7.61  | 0.09 | 0.00 |
| A_52_P468564  | NM_010002 | Cyp2c38    | 13097  | cytochrome P450, family 2, subfamily c, polypeptide 38              | -4.92  | 0.09 | 0.00 |
| A_51_P220062  | NM_008609 | Mmp15      | 17388  | matrix metalloproteinase 15                                         | -10.59 | 0.09 | 0.00 |
| A_51_P250807  | NM_030176 | Spata2L    | 78779  | spermatogenesis associated 2-like                                   | -10.44 | 0.09 | 0.00 |
| A_51_P174275  | NM_027866 | Colec11    | 71693  | collectin sub-family member 11                                      | -8.42  | 0.09 | 0.00 |
| A_51_P189733  | NM_175250 | 2810007J2  | 76971  | RIKEN cDNA 2810007J24 gene                                          | -8.27  | 0.09 | 0.00 |
| A_51_P186547  | NM_008777 | Pah        | 18478  | phenylalanine hydroxylase                                           | -8.44  | 0.09 | 0.00 |
| A_51_P463440  | NM_130450 | Elov16     | 170439 | ELOVL family member 6, elongation of long chain fatty acids (yeast) | -9.89  | 0.09 | 0.00 |
| A_51_P136303  | NM_134127 | Cyp4f15    | 106648 | cytochrome P450, family 4, subfamily f, polypeptide 15              | -7.20  | 0.08 | 0.00 |

|              |           |           |        |                                                                                            |        |      |      |
|--------------|-----------|-----------|--------|--------------------------------------------------------------------------------------------|--------|------|------|
| A_52_P253567 | NM_013821 | Hsd3b6    | 15497  | hydroxy-delta-5-steroid dehydrogenase, 3 beta- and steroid delta-isomerase 6               | -14.13 | 0.08 | 0.00 |
| A_52_P303754 | AK050221  | 9130016M  | 71620  | RIKEN cDNA 9130016M20 gene                                                                 | -7.83  | 0.08 | 0.00 |
| A_52_P674467 | NM_001039 | Lin7a     | 108030 | lin-7 homolog A (C. elegans)                                                               | -15.64 | 0.08 | 0.00 |
| A_51_P431737 | NM_145953 | Cth       | 107869 | cystathionase (cystathionine gamma-lyase)                                                  | -8.84  | 0.08 | 0.00 |
| A_51_P229655 | XM_001002 | NA        | NA     | NA                                                                                         | -11.58 | 0.08 | 0.00 |
| A_51_P268929 | AK050061  | NA        | NA     | NA                                                                                         | -9.66  | 0.08 | 0.00 |
| A_51_P475378 | NM_024208 | Echdc3    | 67856  | enoyl Coenzyme A hydratase domain containing 3 splA/ryanodine receptor domain and SOCS box | -16.07 | 0.08 | 0.00 |
| A_52_P659312 | NM_145134 | Spsb4     | 211949 | containing 4                                                                               | -12.29 | 0.08 | 0.00 |
| A_51_P398525 | NM_022014 | Fn3k      | 63828  | fructosamine 3 kinase                                                                      | -11.81 | 0.08 | 0.00 |
| A_52_P817975 | BY711602  | NA        | NA     | NA                                                                                         | -13.56 | 0.08 | 0.00 |
| A_51_P468140 | NM_008223 | Serpind1  | 15160  | serine (or cysteine) peptidase inhibitor, clade D, member 1                                | -9.78  | 0.08 | 0.00 |
| A_52_P306357 | BC042707  | Prok1     | 246691 | prokineticin 1                                                                             | -9.82  | 0.07 | 0.00 |
| A_52_P670188 | NM_027301 | Sdr9c7    | 70061  | 4short chain dehydrogenase/reductase family 9C, member 7                                   | -10.94 | 0.07 | 0.00 |
| A_52_P163021 | NM_182959 | Slc17a8   | 216227 | solute carrier family 17 (sodium-dependent inorganic phosphate cotransporter), member 8    | -11.15 | 0.07 | 0.00 |
| A_51_P382764 | BC021607  | Akr1c20   | 116852 | aldo-keto reductase family 1, member C20                                                   | -8.27  | 0.07 | 0.00 |
| A_52_P339759 | NM_153193 | Hsd3b2    | 15493  | hydroxy-delta-5-steroid dehydrogenase, 3 beta- and steroid delta-isomerase 2               | -17.78 | 0.07 | 0.00 |
| A_52_P241619 | NM_026085 | 3110049J2 | 67307  | RIKEN cDNA 3110049J23 gene                                                                 | -11.75 | 0.07 | 0.00 |
| A_52_P297765 | XM_134539 | NA        | NA     | NA                                                                                         | -9.18  | 0.07 | 0.00 |
| A_52_P425499 | XM_001006 | NA        | NA     | NA                                                                                         | -10.76 | 0.07 | 0.00 |
| A_51_P221651 | NM_023341 | Cabc1     | 67426  | chaperone, ABC1 activity of bc1 complex like (S. pombe)                                    | -9.04  | 0.06 | 0.00 |
| A_51_P273596 | NM_146126 | Sord      | 20322  | sorbitol dehydrogenase                                                                     | -8.81  | 0.06 | 0.00 |
| A_52_P67637  | AK080673  | Sc5d      | 235293 | sterol-C5-desaturase (fungal ERG3, delta-5-desaturase) homolog (S. cerevisiae)             | -9.19  | 0.06 | 0.00 |
| A_51_P389539 | NM_054053 | Gpr98     | 110789 | G protein-coupled receptor 98                                                              | -8.60  | 0.06 | 0.00 |
| A_52_P21486  | NM_183257 | Hamp2     | 66438  | hepcidin antimicrobial peptide 2                                                           | -6.40  | 0.06 | 0.00 |

|              |           |            |        |                                                                              |        |      |      |
|--------------|-----------|------------|--------|------------------------------------------------------------------------------|--------|------|------|
| A_52_P69109  | NM_011387 | Slc10a1    | 20493  | solute carrier family 10 (sodium/bile acid cotransporter family), member 1   | -11.55 | 0.06 | 0.00 |
| A_51_P189082 | NM_030611 | Akr1c6     | 83702  | aldo-keto reductase family 1, member C6                                      | -8.40  | 0.06 | 0.00 |
| A_51_P244950 | AK004822  | Dpys       | 64705  | dihydropyrimidinase                                                          | -11.68 | 0.06 | 0.00 |
| A_52_P69558  | XM_001003 | NA         | NA     | NA                                                                           | -20.04 | 0.06 | 0.00 |
| A_51_P239177 | NM_175391 | Apol7c     | 108956 | apolipoprotein L 7c                                                          | -13.33 | 0.06 | 0.00 |
| A_52_P595463 | NM_177002 | C730048C13 | 19800  | RIKEN cDNA C730048C13 gene                                                   | -10.99 | 0.05 | 0.00 |
| A_51_P140803 | NM_178235 | Slco1b2    | 28253  | solute carrier organic anion transporter family, member 1b2                  | -9.20  | 0.05 | 0.00 |
| A_52_P239752 | AK077971  | Ttc39c     | 72747  | tetratricopeptide repeat domain 39C                                          | -19.39 | 0.05 | 0.00 |
| A_52_P595455 | NM_001013 | Gm5631     | 434674 | predicted gene 5631                                                          | -12.24 | 0.05 | 0.00 |
| A_52_P470560 | NM_022722 | Dpys       | 64705  | dihydropyrimidinase                                                          | -12.83 | 0.05 | 0.00 |
| A_51_P175424 | NM_011797 | Car14      | 23831  | carbonic anhydrase 14                                                        | -14.45 | 0.05 | 0.00 |
| A_52_P566718 | NM_019811 | Acss2      | 60525  | acyl-CoA synthetase short-chain family member 2                              | -18.82 | 0.05 | 0.00 |
| A_52_P409988 | NM_031197 | Slc2a2     | 20526  | solute carrier family 2 (facilitated glucose transporter), member 2          | -10.89 | 0.05 | 0.00 |
| A_51_P224801 | NM_008455 | Klkb1      | 16621  | kallikrein B, plasma 1                                                       | -13.14 | 0.05 | 0.00 |
| A_51_P488399 | NM_019811 | Acss2      | 60525  | acyl-CoA synthetase short-chain family member 2                              | -13.12 | 0.05 | 0.00 |
| A_51_P497724 | NM_029419 | Apol7a     | 75761  | apolipoprotein L 7a                                                          | -12.23 | 0.05 | 0.00 |
| A_51_P165451 | NM_026085 | 3110049J2  | 67307  | RIKEN cDNA 3110049J23 gene                                                   | -11.73 | 0.04 | 0.00 |
| A_51_P497090 | BC021944  | Enho       | 69638  | energy homeostasis associated                                                | -13.34 | 0.04 | 0.00 |
| A_51_P379385 | NM_153145 | Abca8a     | 217258 | ATP-binding cassette, sub-family A (ABC1), member 8a                         | -14.29 | 0.04 | 0.00 |
| A_51_P308844 | NM_153529 | Nrn1       | 68404  | neuritin 1                                                                   | -14.47 | 0.04 | 0.00 |
| A_52_P459818 | NM_001012 | Hsd3b3     | 15494  | hydroxy-delta-5-steroid dehydrogenase, 3 beta- and steroid delta-isomerase 3 | -12.00 | 0.04 | 0.00 |
| A_51_P240287 | X51971    | Car5a      | 12352  | carbonic anhydrase 5a, mitochondrial                                         | -13.06 | 0.04 | 0.00 |
| A_51_P185693 | NM_031197 | Slc2a2     | 20526  | solute carrier family 2 (facilitated glucose transporter), member 2          | -10.69 | 0.04 | 0.00 |
| A_51_P145662 | NM_029465 | Clec4g     | 75863  | C-type lectin domain family 4, member g                                      | -11.35 | 0.03 | 0.00 |
| A_51_P284177 | NM_134072 | Akr1c14    | 105387 | aldo-keto reductase family 1, member C14                                     | -11.70 | 0.03 | 0.00 |
| A_51_P420415 | NM_175283 | Srd5a1     | 78925  | steroid 5 alpha-reductase 1                                                  | -12.32 | 0.03 | 0.00 |

|              |           |         |        |                                                                              |        |      |      |
|--------------|-----------|---------|--------|------------------------------------------------------------------------------|--------|------|------|
| A_51_P309338 | NM_021022 | Abcb11  | 27413  | ATP-binding cassette, sub-family B (MDR/TAP), member 11                      | -14.20 | 0.03 | 0.00 |
| A_52_P639461 | AK075630  | Car3    | 12350  | carbonic anhydrase 3                                                         | -13.66 | 0.03 | 0.00 |
| A_52_P16752  | NM_023617 | Aox3    | 71724  | aldehyde oxidase 3                                                           | -10.04 | 0.02 | 0.00 |
| A_51_P391616 | NM_027907 | Agxt2l1 | 71760  | alanine-glyoxylate aminotransferase 2-like 1                                 | -10.56 | 0.02 | 0.00 |
| A_52_P653825 | NM_029550 | Keg1    | 64697  | kidney expressed gene 1                                                      | -16.53 | 0.02 | 0.00 |
| A_52_P259537 | NM_010292 | Gck     | 103988 | glucokinase                                                                  | -11.04 | 0.02 | 0.00 |
| A_51_P492153 | NM_029550 | Keg1    | 64697  | kidney expressed gene 1                                                      | -14.39 | 0.01 | 0.00 |
| A_52_P84027  | NM_007824 | Cyp7a1  | 13122  | cytochrome P450, family 7, subfamily a, polypeptide 1                        | -12.64 | 0.01 | 0.00 |
| A_51_P226567 | NM_153193 | Hsd3b2  | 15493  | hydroxy-delta-5-steroid dehydrogenase, 3 beta- and steroid delta-isomerase 2 | -13.90 | 0.01 | 0.00 |
| A_51_P352005 | NM_008294 | Hsd3b4  | 15495  | hydroxy-delta-5-steroid dehydrogenase, 3 beta- and steroid delta-isomerase 4 | -18.27 | 0.01 | 0.00 |
| A_51_P496162 | NM_008295 | Hsd3b5  | 15496  | hydroxy-delta-5-steroid dehydrogenase, 3 beta- and steroid delta-isomerase 5 | -16.19 | 0.01 | 0.00 |

**(d)** LPS in B6;129(E2F1-/-) mice 20 hours post-LPS

| PROBE        | ACCESSION | SYMBOL  | ENTREZID | DESCRIPTION                                        | Score (d) | Fold Change | q-value (%) |
|--------------|-----------|---------|----------|----------------------------------------------------|-----------|-------------|-------------|
| A_51_P482908 | NM_025549 | Arrdc4  | 66412    | arrestin domain containing 4                       | 5.10      | 52.41       | 0.00        |
| A_52_P188042 | NM_198297 | Trat1   | 77647    | T cell receptor associated transmembrane adaptor 1 | 7.17      | 48.07       | 0.00        |
| A_51_P354126 | NM_011260 | Reg3g   | 19695    | regenerating islet-derived 3 gamma                 | 6.46      | 36.29       | 0.00        |
| A_51_P172853 | NM_009841 | Cd14    | 12475    | CD14 antigen                                       | 4.80      | 25.44       | 0.06        |
| A_52_P319361 | NM_029494 | Rab30   | 75985    | RAB30, member RAS oncogene family                  | 4.47      | 24.27       | 0.08        |
| A_51_P311958 | NM_013623 | Orm3    | 18407    | orosomuroid 3                                      | 4.78      | 24.04       | 0.06        |
| A_51_P490456 | NM_178373 | Cidec   | 14311    | cell death-inducing DFFA-like effector c           | 3.90      | 22.06       | 0.21        |
| A_52_P338066 | NM_023137 | Ubd     | 24108    | ubiquitin D                                        | 5.10      | 17.95       | 0.00        |
| A_52_P286511 | NM_021352 | Crybb3  | 12962    | crystallin, beta B3                                | 6.40      | 16.73       | 0.00        |
| A_51_P493649 | NM_023135 | Sult1e1 | 20860    | sulfotransferase family 1E, member 1               | 5.19      | 16.70       | 0.00        |
| A_52_P174942 | AK040447  | Nrp1    | 18186    | neuropilin 1                                       | 3.78      | 16.42       | 0.25        |
| A_52_P603038 | NM_016968 | Olig1   | 50914    | oligodendrocyte transcription factor 1             | 3.76      | 15.97       | 0.25        |
| A_52_P455370 | NM_175628 | A2m     | 232345   | alpha-2-macroglobulin                              | 5.71      | 15.91       | 0.00        |
| A_51_P257951 | NM_020509 | Retnla  | 57262    | resistin like alpha                                | 4.97      | 15.89       | 0.07        |
| A_51_P169671 | NM_011036 | Reg3b   | 18489    | regenerating islet-derived 3 beta                  | 5.13      | 15.66       | 0.00        |



|              |           |           |         |                                                           |      |       |      |
|--------------|-----------|-----------|---------|-----------------------------------------------------------|------|-------|------|
| A_51_P408703 | NM_028842 | NA        | NA      | NA                                                        | 4.25 | 14.56 | 0.13 |
| A_51_P510156 | NM_008491 | Lcn2      | 16819   | lipocalin 2                                               | 5.19 | 14.39 | 0.00 |
| A_51_P228753 | XM_897631 | NA        | NA      | NA                                                        | 3.68 | 14.15 | 0.29 |
| A_51_P412817 | AK029791  | Dnahc2    | 327954  | dynein, axonemal, heavy chain 2                           | 6.42 | 13.77 | 0.00 |
| A_51_P216550 | NM_011641 | Trp63     | 22061   | transformation related protein 63                         | 3.68 | 13.76 | 0.29 |
| A_52_P247900 | U42467    | Lepr      | 16847   | leptin receptor                                           | 3.89 | 13.72 | 0.21 |
| A_52_P601446 | AK049314  | Trim27    | 19720   | tripartite motif-containing 27                            | 4.56 | 13.28 | 0.09 |
| A_52_P201245 | NM_133902 | Sdsl      | 257635  | serine dehydratase-like                                   | 7.99 | 13.17 | 0.00 |
| A_52_P254817 | NM_020509 | Retnla    | 57262   | resistin like alpha                                       | 4.78 | 13.07 | 0.06 |
| A_51_P340601 | NM_009770 | Btg3      | 12228   | B-cell translocation gene 3                               | 3.67 | 12.05 | 0.29 |
| A_51_P480290 | AK010559  | Casz1     | 69743   | castor homolog 1, zinc finger (Drosophila)                | 4.05 | 11.85 | 0.16 |
| A_52_P850132 | AK008330  | 2010107C1 | 70256   | RIKEN cDNA 2010107C10 gene                                | 3.86 | 11.54 | 0.22 |
| A_51_P480119 | NM_029942 | Preli2    | 77619   | PRELI domain containing 2                                 | 4.23 | 11.39 | 0.13 |
| A_51_P352594 | NM_001001 | St5       | 76954   | suppression of tumorigenicity 5                           | 3.53 | 11.19 | 0.34 |
| A_51_P131408 | NM_013749 | Tnfrsf12a | 27279   | tumor necrosis factor receptor superfamily, member 12a    | 4.15 | 10.34 | 0.15 |
| A_52_P472324 | NM_011414 | Slpi      | 20568   | secretory leukocyte peptidase inhibitor                   | 4.72 | 10.09 | 0.06 |
| A_51_P180747 | NM_007796 | Ctla2a    | 13024   | cytotoxic T lymphocyte-associated protein 2 alpha         | 5.85 | 10.06 | 0.00 |
| A_51_P396045 | NM_010704 | Lepr      | 16847   | leptin receptor                                           | 4.63 | 9.69  | 0.05 |
| A_52_P525348 | NA        | NA        | NA      | NA                                                        | 5.18 | 9.58  | 0.00 |
| A_51_P209183 | NM_019568 | Cxcl14    | 57266   | chemokine (C-X-C motif) ligand 14                         | 4.12 | 9.55  | 0.14 |
| A_51_P208152 | AK014460  | 3930402G2 | 2665306 | RIKEN cDNA 3930402G23 gene                                | 4.43 | 9.53  | 0.08 |
| A_52_P419678 | NM_001033 | Serpina3f | 238393  | serine (or cysteine) peptidase inhibitor, clade A, member | 3.68 | 9.52  | 0.29 |
| A_51_P354165 | NM_011318 | Apcs      | 20219   | serum amyloid P-component                                 | 7.00 | 9.21  | 0.00 |
| A_51_P367263 | NM_199222 | Lman1l    | 235416  | lectin, mannose-binding 1 like                            | 3.36 | 9.03  | 0.46 |
| A_52_P431159 | NM_001039 | Il1rn     | 16181   | interleukin 1 receptor antagonist                         | 3.98 | 8.92  | 0.17 |
| A_52_P799815 | NM_001025 | Tmem171   | 380863  | transmembrane protein 171                                 | 3.06 | 8.84  | 0.76 |
| A_51_P170807 | NM_016693 | Map3k6    | 53608   | mitogen-activated protein kinase kinase kinase 6          | 4.66 | 8.56  | 0.05 |
| A_52_P423810 | AK154954  | Mt1       | 17748   | metallothionein 1                                         | 4.81 | 8.46  | 0.06 |
| A_51_P167292 | NM_009892 | Chi3l3    | 12655   | chitinase 3-like 3                                        | 5.30 | 8.40  | 0.00 |
| A_51_P489522 | AK150917  | Ctla2b    | 13025   | cytotoxic T lymphocyte-associated protein 2 beta          | 5.82 | 8.20  | 0.00 |
| A_51_P320930 | NM_198297 | Trat1     | 77647   | T cell receptor associated transmembrane adaptor 1        | 4.90 | 8.14  | 0.07 |
| A_52_P544043 | BC013068  | Pcsk5     | 18552   | proprotein convertase subtilisin/kexin type 5             | 5.48 | 8.11  | 0.00 |
| A_51_P238722 | NM_010740 | Cd93      | 17064   | CD93 antigen                                              | 5.61 | 8.08  | 0.00 |
| A_51_P488196 | NM_028472 | Bmper     | 73230   | BMP-binding endothelial regulator                         | 4.23 | 7.99  | 0.13 |

|              |           |           |        |                                                           |      |      |      |
|--------------|-----------|-----------|--------|-----------------------------------------------------------|------|------|------|
| A_52_P427640 | XR_002113 | EG667984  | 667984 | predicted gene, EG667984                                  | 4.88 | 7.89 | 0.07 |
| A_52_P222775 | NM_016693 | Map3k6    | 53608  | mitogen-activated protein kinase kinase kinase 6          | 4.89 | 7.76 | 0.07 |
| A_52_P185343 | AK011851  | Gna13     | 14674  | guanine nucleotide binding protein, alpha 13              | 4.71 | 7.75 | 0.06 |
| A_51_P165244 | NM_018734 | Gbp3      | 55932  | guanylate binding protein 3                               | 4.11 | 7.63 | 0.14 |
| A_51_P422257 | NM_010131 | Emx1      | 13796  | empty spiracles homolog 1 (Drosophila)                    | 3.79 | 7.60 | 0.25 |
| A_51_P363947 | NM_007669 | Cdkn1a    | 12575  | cyclin-dependent kinase inhibitor 1A (P21)                | 4.22 | 7.49 | 0.13 |
| A_52_P419679 | NM_001033 | Serpina3f | 238393 | serine (or cysteine) peptidase inhibitor, clade A, member | 3.59 | 7.35 | 0.32 |
| A_52_P229943 | NM_178933 | Ostb      | 330962 | organic solute transporter beta                           | 4.22 | 7.23 | 0.13 |
| A_51_P512384 | NM_001044 | Timp1     | 21857  | tissue inhibitor of metalloproteinase 1                   | 4.95 | 7.02 | 0.07 |
| A_51_P111612 | NM_001042 | Arrdc4    | 66412  | arrestin domain containing 4                              | 3.26 | 7.02 | 0.53 |
| A_51_P461665 | NM_008599 | Cxcl9     | 17329  | chemokine (C-X-C motif) ligand 9                          | 4.69 | 6.93 | 0.05 |
| A_52_P442234 | NM_008197 | H1f0      | 14958  | H1 histone family, member 0                               | 4.46 | 6.90 | 0.08 |
| A_51_P216605 | NM_177993 | Hbp1      | 73389  | high mobility group box transcription factor 1            | 3.71 | 6.85 | 0.28 |
| A_52_P416756 | NM_033075 | D17H6S56E | 110956 | DNA segment, Chr 17, human D6S56E 5                       | 4.55 | 6.74 | 0.09 |
| A_52_P386627 | NM_028679 | Irak3     | 73914  | interleukin-1 receptor-associated kinase 3                | 4.32 | 6.71 | 0.11 |
| A_51_P307166 | NM_001039 | Il1rn     | 16181  | interleukin 1 receptor antagonist                         | 3.78 | 6.70 | 0.25 |
| A_51_P203955 | NM_010260 | Gbp2      | 14469  | guanylate binding protein 2                               | 3.83 | 6.70 | 0.23 |
| A_52_P631307 | AK043577  | Ypel4     | 241525 | yippee-like 4 (Drosophila)                                | 3.87 | 6.69 | 0.20 |
| A_52_P103628 | NA        | NA        | NA     | NA                                                        | 4.46 | 6.63 | 0.08 |
| A_52_P429450 | NM_008694 | Ngp       | 18054  | neutrophilic granule protein                              | 4.37 | 6.58 | 0.11 |
| A_52_P294510 | NM_145594 | Fgl1      | 234199 | fibrinogen-like protein 1                                 | 8.56 | 6.54 | 0.00 |
| A_52_P321150 | NM_023516 | 2310016C0 | 69573  | RIKEN cDNA 2310016C08 gene                                | 4.14 | 6.53 | 0.15 |
| A_52_P646979 | NM_025967 | D16Ertd47 | 67102  | DNA segment, Chr 16, ERATO Doi 472, expressed             | 3.16 | 6.50 | 0.65 |
| A_52_P131458 | NM_027238 | Ttc39b    | 69863  | tetratricopeptide repeat domain 39B                       | 4.61 | 6.45 | 0.05 |
| A_51_P141546 | NM_011016 | Orm2      | 18406  | orosomuroid 2                                             | 6.95 | 6.44 | 0.00 |
| A_52_P98140  | BE865018  | NA        | NA     | NA                                                        | 3.91 | 6.42 | 0.21 |
| A_51_P267969 | NM_011259 | Reg3a     | 19694  | regenerating islet-derived 3 alpha                        | 4.03 | 6.41 | 0.16 |
| A_51_P233797 | NM_009626 | Adh7      | 11529  | alcohol dehydrogenase 7 (class IV), mu or sigma polypept  | 5.26 | 6.36 | 0.00 |
| A_52_P523835 | AK029360  | Nfe2l2    | 18024  | nuclear factor, erythroid derived 2, like 2               | 3.10 | 6.35 | 0.70 |
| A_51_P280455 | AB034730  | Prg4      | 96875  | proteoglycan 4 (megakaryocyte stimulating factor, articu  | 5.87 | 6.31 | 0.00 |
| A_52_P339726 | NA        | NA        | NA     | NA                                                        | 3.96 | 6.31 | 0.17 |
| A_51_P511810 | NM_001042 | Cd63      | 12512  | CD63 antigen                                              | 5.72 | 6.29 | 0.00 |
| A_51_P439085 | NM_023516 | 2310016C0 | 69573  | RIKEN cDNA 2310016C08 gene                                | 4.04 | 6.27 | 0.16 |
| A_52_P301935 | NM_001033 | Il20rb    | 213208 | interleukin 20 receptor beta                              | 3.40 | 6.27 | 0.42 |

|              |           |           |        |                                                             |       |      |      |
|--------------|-----------|-----------|--------|-------------------------------------------------------------|-------|------|------|
| A_51_P465211 | NM_026323 | Wfdc2     | 67701  | WAP four-disulfide core domain 2                            | 4.11  | 6.27 | 0.14 |
| A_51_P159453 | NM_009252 | Serpina3n | 20716  | serine (or cysteine) peptidase inhibitor, clade A, member   | 5.29  | 6.26 | 0.00 |
| A_51_P155643 | NM_016740 | S100a11   | 20195  | S100 calcium binding protein A11 (calgizzarin)              | 4.15  | 6.24 | 0.15 |
| A_51_P295315 | NM_020033 | Ankrd2    | 56642  | ankyrin repeat domain 2 (stretch responsive muscle)         | 3.52  | 6.21 | 0.35 |
| A_52_P437421 | NM_028472 | Bmper     | 73230  | BMP-binding endothelial regulator                           | 3.74  | 6.19 | 0.26 |
| A_51_P371750 | NM_010766 | Marco     | 17167  | macrophage receptor with collagenous structure              | 4.47  | 6.16 | 0.08 |
| A_51_P219325 | NM_028038 | Ddx28     | 71986  | DEAD (Asp-Glu-Ala-Asp) box polypeptide 28                   | 4.27  | 6.15 | 0.10 |
| A_52_P260145 | XM_978721 | NA        | NA     | NA                                                          | 4.19  | 6.13 | 0.12 |
| A_51_P168459 | NM_030694 | Ifitm2    | 80876  | interferon induced transmembrane protein 2                  | 6.19  | 6.08 | 0.00 |
| A_51_P327405 | NM_029509 | Gbp8      | 76074  | guanylate-binding protein 8                                 | 3.15  | 6.05 | 0.66 |
| A_52_P288270 | XR_003114 | NA        | NA     | NA                                                          | 6.00  | 6.05 | 0.00 |
| A_52_P533817 | AK009185  | Barx2     | 12023  | BarH-like homeobox 2                                        | 5.95  | 6.03 | 0.00 |
| A_52_P428599 | NM_145126 | Chi3l4    | 104183 | chitinase 3-like 4                                          | 5.58  | 6.03 | 0.00 |
| A_52_P344949 | NM_172777 | Gbp9      | 236573 | guanylate-binding protein 9                                 | 3.72  | 6.01 | 0.27 |
| A_51_P144264 | NM_008452 | Klf2      | 16598  | Kruppel-like factor 2 (lung)                                | 4.20  | 6.00 | 0.13 |
| A_52_P261086 | AK085154  | Tmem140   | 68487  | transmembrane protein 140                                   | 5.12  | 5.95 | 0.00 |
| A_52_P510987 | NM_175628 | A2m       | 232345 | alpha-2-macroglobulin                                       | 4.96  | 5.92 | 0.07 |
| A_51_P173678 | NM_029415 | Slc10a6   | 75750  | solute carrier family 10 (sodium/bile acid cotransporter f. | 3.07  | 5.90 | 0.74 |
| A_51_P262340 | BC106176  | Rbm3      | 19652  | RNA binding motif protein 3                                 | 4.47  | 5.90 | 0.08 |
| A_51_P166941 | NM_028679 | Irak3     | 73914  | interleukin-1 receptor-associated kinase 3                  | 4.07  | 5.90 | 0.16 |
| A_52_P383653 | NM_001033 | Cpne8     | 66871  | copine VIII                                                 | 5.01  | 5.88 | 0.08 |
| A_52_P518827 | NM_009931 | Col4a1    | 12826  | collagen, type IV, alpha 1                                  | 5.91  | 5.86 | 0.00 |
| A_51_P134468 | NM_033075 | D17H6S56E | 110956 | DNA segment, Chr 17, human D6S56E 5                         | 4.37  | 5.86 | 0.11 |
| A_51_P213544 | NM_010637 | Klf4      | 16600  | Kruppel-like factor 4 (gut)                                 | 3.83  | 5.82 | 0.24 |
| A_52_P492189 | NA        | NA        | NA     | NA                                                          | 10.24 | 5.82 | 0.00 |
| A_52_P334562 | NM_009504 | Vdr       | 22337  | vitamin D receptor                                          | 6.97  | 5.76 | 0.00 |
| A_52_P522157 | BC032970  | 2810026P1 | 72655  | RIKEN cDNA 2810026P18 gene                                  | 3.16  | 5.73 | 0.65 |
| A_52_P46085  | NM_080638 | Mvp       | 78388  | major vault protein                                         | 6.29  | 5.71 | 0.00 |
| A_52_P496935 | NM_030184 | Armc9     | 78795  | armadillo repeat containing 9                               | 6.26  | 5.68 | 0.00 |
| A_51_P352924 | NM_010193 | Fem1b     | 14155  | feminization 1 homolog b (C. elegans)                       | 4.31  | 5.67 | 0.11 |
| A_51_P362066 | NM_007695 | Chi3l1    | 12654  | chitinase 3-like 1                                          | 4.68  | 5.66 | 0.05 |
| A_52_P553885 | NM_172514 | Tmem71    | 213068 | transmembrane protein 71                                    | 5.30  | 5.63 | 0.00 |
| A_52_P462071 | NM_178798 | Slc7a6    | 330836 | solute carrier family 7 (cationic amino acid transporter, y | 3.08  | 5.62 | 0.71 |
| A_51_P336325 | NM_008768 | Orm1      | 18405  | orosomuroid 1                                               | 8.14  | 5.62 | 0.00 |

|              |           |           |        |                                                           |      |      |      |
|--------------|-----------|-----------|--------|-----------------------------------------------------------|------|------|------|
| A_52_P496726 | NM_009026 | Rasd1     | 19416  | RAS, dexamethasone-induced 1                              | 3.58 | 5.58 | 0.33 |
| A_52_P371949 | AK018313  | Eif6      | 16418  | eukaryotic translation initiation factor 6                | 4.99 | 5.57 | 0.08 |
| A_52_P50529  | BC116253  | Nlrp12    | 378425 | NLR family, pyrin domain containing 12                    | 3.59 | 5.57 | 0.32 |
| A_51_P124254 | NM_009931 | Col4a1    | 12826  | collagen, type IV, alpha 1                                | 5.33 | 5.56 | 0.00 |
| A_52_P354682 | NM_029001 | Elov17    | 74559  | ELOVL family member 7, elongation of long chain fatty ac  | 3.01 | 5.52 | 0.82 |
| A_51_P461108 | NM_148958 | Osbpl10   | 74486  | oxysterol binding protein-like 10                         | 4.29 | 5.52 | 0.10 |
| A_52_P644273 | NM_028679 | Irak3     | 73914  | interleukin-1 receptor-associated kinase 3                | 4.02 | 5.50 | 0.18 |
| A_51_P476091 | NA        | NA        | NA     | NA                                                        | 3.85 | 5.48 | 0.22 |
| A_51_P197528 | D86232    | Ly6c2     | 1E+08  | lymphocyte antigen 6 complex, locus C2                    | 5.31 | 5.48 | 0.00 |
| A_51_P513504 | NM_016810 | Gosr1     | 53334  | golgi SNAP receptor complex member 1                      | 4.64 | 5.48 | 0.05 |
| A_51_P511236 | NM_001077 | Pik3r1    | 18708  | phosphatidylinositol 3-kinase, regulatory subunit, polype | 3.40 | 5.46 | 0.42 |
| A_51_P337308 | NM_011315 | Saa3      | 20210  | serum amyloid A 3                                         | 4.31 | 5.44 | 0.11 |
| A_52_P593110 | AK015056  | Ptbp2     | 56195  | polypyrimidine tract binding protein 2                    | 3.25 | 5.32 | 0.55 |
| A_52_P102931 | AK087160  | Gimap5    | 317757 | GTPase, IMAP family member 5                              | 6.96 | 5.27 | 0.00 |
| A_51_P452506 | NM_145538 | Tmem189   | 407243 | transmembrane protein 189                                 | 4.05 | 5.21 | 0.16 |
| A_51_P407028 | NM_007607 | Car4      | 12351  | carbonic anhydrase 4                                      | 3.08 | 5.20 | 0.72 |
| A_51_P176954 | NM_008575 | Mdm4      | 17248  | transformed mouse 3T3 cell double minute 4                | 5.00 | 5.17 | 0.08 |
| A_52_P327176 | NM_018884 | Pdzrn3    | 55983  | PDZ domain containing RING finger 3                       | 4.58 | 5.17 | 0.09 |
| A_51_P265495 | NM_010738 | Ly6a      | 110454 | lymphocyte antigen 6 complex, locus A                     | 5.51 | 5.17 | 0.00 |
| A_51_P266928 | NM_172514 | Tmem71    | 213068 | transmembrane protein 71                                  | 4.87 | 5.16 | 0.07 |
| A_51_P379976 | NM_001039 | Arl4a     | 11861  | ADP-ribosylation factor-like 4A                           | 4.38 | 5.14 | 0.11 |
| A_51_P183571 | NM_008871 | Serpine1  | 18787  | serine (or cysteine) peptidase inhibitor, clade E, member | 3.38 | 5.14 | 0.44 |
| A_51_P168981 | AK015225  | Ptar1     | 72351  | protein prenyltransferase alpha subunit repeat containin  | 3.50 | 5.13 | 0.36 |
| A_52_P559618 | NM_030694 | Ifitm2    | 80876  | interferon induced transmembrane protein 2                | 6.91 | 5.12 | 0.00 |
| A_51_P178692 | NM_007930 | Enc1      | 13803  | ectodermal-neural cortex 1                                | 2.97 | 5.07 | 0.89 |
| A_51_P282508 | NM_007484 | Rhoc      | 11853  | ras homolog gene family, member C                         | 4.63 | 5.05 | 0.05 |
| A_52_P155849 | NM_001039 | Arl4a     | 11861  | ADP-ribosylation factor-like 4A                           | 4.06 | 5.05 | 0.16 |
| A_52_P605319 | NM_199148 | BC051665  | 218275 | cDNA sequence BC051665                                    | 3.64 | 5.01 | 0.30 |
| A_51_P418116 | NM_146162 | Tmem119   | 231633 | transmembrane protein 119                                 | 5.08 | 5.00 | 0.00 |
| A_52_P474528 | NA        | NA        | NA     | NA                                                        | 3.81 | 4.95 | 0.24 |
| A_52_P437066 | XM_905410 | LOC631287 | 631287 | similar to interferon induced transmembrane protein 2     | 6.18 | 4.90 | 0.00 |
| A_51_P512379 | NA        | NA        | NA     | NA                                                        | 3.95 | 4.89 | 0.19 |
| A_52_P230938 | NM_010741 | Ly6c1     | 17067  | lymphocyte antigen 6 complex, locus C1                    | 5.65 | 4.87 | 0.00 |
| A_52_P579933 | NM_001029 | Slc16a6   | 104681 | solute carrier family 16 (monocarboxylic acid transporter | 3.13 | 4.87 | 0.68 |

|               |           |          |        |                                                       |      |      |      |
|---------------|-----------|----------|--------|-------------------------------------------------------|------|------|------|
| A_52_P577386  | NM_010531 | Il18bp   | 16068  | interleukin 18 binding protein                        | 6.46 | 4.86 | 0.00 |
| A_52_P686785  | NM_053247 | Lyve1    | 114332 | lymphatic vessel endothelial hyaluronan receptor 1    | 4.28 | 4.84 | 0.10 |
| A_52_P399998  | NM_016920 | Atp6v0a1 | 11975  | ATPase, H+ transporting, lysosomal V0 subunit A1      | 5.05 | 4.82 | 0.08 |
| A_51_P168203  | NM_025446 | Aig1     | 66253  | androgen-induced 1                                    | 7.91 | 4.82 | 0.00 |
| A_51_P279606  | NM_009896 | Socs1    | 12703  | suppressor of cytokine signaling 1                    | 3.24 | 4.82 | 0.56 |
| A_51_P240768  | NM_021284 | Kras     | 16653  | v-Ki-ras2 Kirsten rat sarcoma viral oncogene homolog  | 3.36 | 4.82 | 0.46 |
| A_51_P266987  | NM_013615 | Odf2     | 18286  | outer dense fiber of sperm tails 2                    | 4.79 | 4.81 | 0.06 |
| A_52_P87713   | NM_001044 | Timp1    | 21857  | tissue inhibitor of metalloproteinase 1               | 4.44 | 4.79 | 0.08 |
| A_51_P153063  | NM_029310 | Fabp12   | 75497  | fatty acid binding protein 12                         | 4.62 | 4.79 | 0.05 |
| A_51_P193019  | NM_011157 | Srgn     | 19073  | serglycin                                             | 4.63 | 4.77 | 0.05 |
| A_52_P564663  | NA        | NA       | NA     | NA                                                    | 2.94 | 4.76 | 0.93 |
| A_52_P247086  | AK154692  | Rprd2    | 75137  | regulation of nuclear pre-mRNA domain containing 2    | 3.38 | 4.73 | 0.45 |
| A_52_P88591   | NM_030262 | Pofut2   | 80294  | protein O-fucosyltransferase 2                        | 4.33 | 4.72 | 0.11 |
| A_51_P477250  | AK040652  | Abca6    | 76184  | ATP-binding cassette, sub-family A (ABC1), member 6   | 4.87 | 4.72 | 0.07 |
| A_52_P474002  | NM_178357 | Klf11    | 194655 | Kruppel-like factor 11                                | 3.81 | 4.71 | 0.24 |
| A_51_P136521  | NM_026671 | Lypd2    | 68311  | Ly6/Plaur domain containing 2                         | 2.94 | 4.70 | 0.93 |
| A_51_P286488  | NM_133662 | Ier3     | 15937  | immediate early response 3                            | 2.99 | 4.69 | 0.85 |
| A_52_P191567  | AK140530  | Plcl1    | 227120 | phospholipase C-like 1                                | 4.07 | 4.69 | 0.16 |
| A_51_P499698  | BC057938  | Asprv1   | 67855  | aspartic peptidase, retroviral-like 1                 | 6.10 | 4.68 | 0.00 |
| A_52_P577384  | NM_010531 | Il18bp   | 16068  | interleukin 18 binding protein                        | 6.14 | 4.67 | 0.00 |
| A_51_P188381  | NM_177093 | Lrrc58   | 320184 | leucine rich repeat containing 58                     | 3.21 | 4.66 | 0.59 |
| A_52_P1013432 | NA        | NA       | NA     | NA                                                    | 4.91 | 4.63 | 0.07 |
| A_51_P492640  | NM_008453 | Klf3     | 16599  | Kruppel-like factor 3 (basic)                         | 3.25 | 4.61 | 0.56 |
| A_51_P342567  | NM_031185 | Akap12   | 83397  | A kinase (PRKA) anchor protein (gravin) 12            | 3.38 | 4.61 | 0.45 |
| A_51_P421876  | NM_016850 | Irf7     | 54123  | interferon regulatory factor 7                        | 4.22 | 4.60 | 0.13 |
| A_52_P202895  | NM_001005 | Mtus1    | 102103 | mitochondrial tumor suppressor 1                      | 5.73 | 4.60 | 0.00 |
| A_51_P378903  | NM_146981 | Olf1260  | 258983 | olfactory receptor 1260                               | 6.08 | 4.59 | 0.00 |
| A_51_P470079  | NM_010555 | Il1r2    | 16178  | interleukin 1 receptor, type II                       | 3.93 | 4.55 | 0.19 |
| A_52_P162967  | NM_007642 | Cd28     | 12487  | CD28 antigen                                          | 4.22 | 4.55 | 0.13 |
| A_51_P255456  | NM_009994 | Cyp1b1   | 13078  | cytochrome P450, family 1, subfamily b, polypeptide 1 | 4.23 | 4.54 | 0.13 |
| A_51_P391432  | NM_145449 | Ifi2712b | 217845 | interferon, alpha-inducible protein 27 like 2B        | 5.70 | 4.53 | 0.00 |
| A_51_P396752  | NM_024191 | Arl2bp   | 107566 | ADP-ribosylation factor-like 2 binding protein        | 4.16 | 4.52 | 0.15 |
| A_52_P220879  | NM_009373 | Tgm2     | 21817  | transglutaminase 2, C polypeptide                     | 4.36 | 4.50 | 0.11 |
| A_52_P250644  | NA        | NA       | NA     | NA                                                    | 3.92 | 4.50 | 0.19 |

|              |           |           |        |                                                            |  |      |      |      |
|--------------|-----------|-----------|--------|------------------------------------------------------------|--|------|------|------|
| A_52_P116501 | NA        | NA        | NA     | NA                                                         |  | 5.21 | 4.49 | 0.00 |
| A_52_P615051 | AK035396  | 1200016E2 | 319202 | RIKEN cDNA 1200016E24 gene                                 |  | 3.68 | 4.48 | 0.29 |
| A_51_P123676 | AK034012  | Synpo     | 104027 | synaptopodin                                               |  | 4.96 | 4.48 | 0.07 |
| A_51_P361650 | NM_009117 | Saa1      | 20208  | serum amyloid A 1                                          |  | 3.96 | 4.43 | 0.17 |
| A_52_P681310 | NM_011113 | Plaur     | 18793  | plasminogen activator, urokinase receptor                  |  | 3.67 | 4.43 | 0.29 |
| A_52_P619287 | BC054101  | NA        | NA     | NA                                                         |  | 3.54 | 4.42 | 0.34 |
| A_52_P67643  | AK036004  | Mtor      | 56717  | mechanistic target of rapamycin (serine/threonine kinase   |  | 4.37 | 4.42 | 0.11 |
| A_52_P618807 | NM_133656 | Crk       | 12928  | v-crk sarcoma virus CT10 oncogene homolog (avian)          |  | 4.36 | 4.42 | 0.11 |
| A_52_P292693 | NM_016690 | Hnrpd1    | 50926  | heterogeneous nuclear ribonucleoprotein D-like             |  | 4.74 | 4.40 | 0.06 |
| A_52_P604613 | NM_010333 | S1pr2     | 14739  | sphingosine-1-phosphate receptor 2                         |  | 3.50 | 4.40 | 0.36 |
| A_52_P489295 | NM_009621 | Adamts1   | 11504  | a disintegrin-like and metallopeptidase (reprolysin type)' |  | 4.58 | 4.39 | 0.09 |
| A_51_P246066 | NM_029612 | Slamf9    | 98365  | SLAM family member 9                                       |  | 6.04 | 4.38 | 0.00 |
| A_52_P37702  | NA        | NA        | NA     | NA                                                         |  | 3.30 | 4.38 | 0.52 |
| A_52_P432170 | AK021294  | 2810416G2 | 1E+08  | RIKEN cDNA 2810416G20 gene                                 |  | 3.67 | 4.37 | 0.28 |
| A_51_P315904 | NM_011817 | Gadd45g   | 23882  | growth arrest and DNA-damage-inducible 45 gamma            |  | 4.01 | 4.35 | 0.18 |
| A_51_P384469 | NM_019666 | Syncrip   | 56403  | synaptotagmin binding, cytoplasmic RNA interacting prot    |  | 5.30 | 4.34 | 0.00 |
| A_51_P390538 | XM_129176 | NA        | NA     | NA                                                         |  | 5.10 | 4.29 | 0.00 |
| A_52_P509421 | XM_001003 | NA        | NA     | NA                                                         |  | 4.38 | 4.26 | 0.12 |
| A_52_P422494 | NM_145634 | Cd300lf   | 246746 | CD300 antigen like family member F                         |  | 4.21 | 4.26 | 0.13 |
| A_51_P182796 | NM_009373 | Tgm2      | 21817  | transglutaminase 2, C polypeptide                          |  | 3.65 | 4.24 | 0.30 |
| A_52_P244236 | AK013215  | Tmem87b   | 72477  | transmembrane protein 87B                                  |  | 3.59 | 4.23 | 0.32 |
| A_52_P150212 | NM_011099 | Pkm2      | 18746  | pyruvate kinase, muscle                                    |  | 5.37 | 4.22 | 0.00 |
| A_51_P428913 | D38379    | Pkm2      | 18746  | pyruvate kinase, muscle                                    |  | 4.99 | 4.21 | 0.08 |
| A_51_P197209 | NM_133770 | Adck4     | 76889  | aarF domain containing kinase 4                            |  | 3.05 | 4.20 | 0.76 |
| A_51_P254656 | NM_008230 | Hdc       | 15186  | histidine decarboxylase                                    |  | 4.16 | 4.19 | 0.12 |
| A_52_P295432 | NM_009141 | Cxcl5     | 20311  | chemokine (C-X-C motif) ligand 5                           |  | 2.98 | 4.16 | 0.87 |
| A_51_P480855 | NM_021385 | Rad18     | 58186  | RAD18 homolog ( <i>S. cerevisiae</i> )                     |  | 3.88 | 4.16 | 0.20 |
| A_51_P229129 | NM_146818 | Olfr1218  | 258815 | olfactory receptor 1218                                    |  | 4.57 | 4.15 | 0.09 |
| A_52_P338651 | NM_011256 | Pitpnm2   | 19679  | phosphatidylinositol transfer protein, membrane-associa    |  | 5.97 | 4.15 | 0.00 |
| A_51_P249989 | NM_145133 | Tifa      | 211550 | TRAF-interacting protein with forkhead-associated doma     |  | 3.07 | 4.15 | 0.74 |
| A_51_P112355 | NM_018738 | Igtp      | 16145  | interferon gamma induced GTPase                            |  | 3.42 | 4.14 | 0.40 |
| A_51_P294555 | NM_001033 | Ifitm6    | 213002 | interferon induced transmembrane protein 6                 |  | 4.36 | 4.14 | 0.11 |
| A_52_P676510 | NM_011579 | Tgtp      | 21822  | T-cell specific GTPase                                     |  | 3.30 | 4.13 | 0.50 |
| A_51_P495462 | AK018118  | Gad2      | 14417  | glutamic acid decarboxylase 2                              |  | 4.21 | 4.12 | 0.13 |

|               |           |           |        |                                                           |      |      |      |
|---------------|-----------|-----------|--------|-----------------------------------------------------------|------|------|------|
| A_51_P173709  | NM_022420 | Gprc5b    | 64297  | G protein-coupled receptor, family C, group 5, member B   | 2.98 | 4.11 | 0.87 |
| A_51_P443754  | NM_010437 | Hivep2    | 15273  | human immunodeficiency virus type I enhancer binding p    | 3.51 | 4.11 | 0.36 |
| A_51_P429087  | NM_133669 | Rp2h      | 19889  | retinitis pigmentosa 2 homolog (human)                    | 5.17 | 4.10 | 0.00 |
| A_51_P408506  | BC008626  | Icam1     | 15894  | intercellular adhesion molecule 1                         | 3.58 | 4.10 | 0.33 |
| A_52_P344978  | XR_003344 | NA        | NA     | NA                                                        | 5.14 | 4.09 | 0.00 |
| A_52_P357177  | NM_001005 | Mtus1     | 102103 | mitochondrial tumor suppressor 1                          | 5.11 | 4.03 | 0.00 |
| A_52_P535122  | NA        | NA        | NA     | NA                                                        | 2.91 | 4.02 | 0.99 |
| A_52_P220810  | NM_144551 | Trib2     | 217410 | tribbles homolog 2 (Drosophila)                           | 3.94 | 4.02 | 0.19 |
| A_51_P480241  | NM_007921 | Elf3      | 13710  | E74-like factor 3                                         | 3.17 | 4.01 | 0.63 |
| A_51_P255699  | NM_010809 | Mmp3      | 17392  | matrix metalloproteinase 3                                | 3.57 | 4.01 | 0.33 |
| A_52_P1196729 | AK086288  | NA        | NA     | NA                                                        | 3.33 | 4.00 | 0.49 |
| A_51_P493467  | NM_145588 | Kif22     | 110033 | kinesin family member 22                                  | 3.74 | 3.99 | 0.26 |
| A_51_P418375  | NM_023844 | Jam2      | 67374  | junction adhesion molecule 2                              | 3.53 | 3.97 | 0.34 |
| A_51_P327920  | AK030273  | St7l      | 229681 | suppression of tumorigenicity 7-like                      | 3.93 | 3.97 | 0.19 |
| A_51_P452119  | NM_008498 | Lhx1      | 16869  | LIM homeobox protein 1                                    | 3.99 | 3.96 | 0.18 |
| A_51_P402943  | NM_009114 | S100a9    | 20202  | S100 calcium binding protein A9 (calgranulin B)           | 4.33 | 3.96 | 0.11 |
| A_52_P658945  | XM_973796 | NA        | NA     | NA                                                        | 3.78 | 3.95 | 0.25 |
| A_51_P345367  | NM_010724 | Psmb8     | 16913  | proteasome (prosome, macropain) subunit, beta type 8 (    | 5.04 | 3.94 | 0.08 |
| A_51_P397367  | NM_009196 | Slc16a1   | 20501  | solute carrier family 16 (monocarboxylic acid transporter | 3.59 | 3.94 | 0.32 |
| A_51_P306839  | NM_025465 | 1810029B1 | 66282  | RIKEN cDNA 1810029B16 gene                                | 3.65 | 3.92 | 0.30 |
| A_51_P501248  | NM_025367 | Sphk1     | 20698  | sphingosine kinase 1                                      | 3.18 | 3.88 | 0.62 |
| A_51_P294979  | NM_013602 | Mt1       | 17748  | metallothionein 1                                         | 3.22 | 3.88 | 0.58 |
| A_52_P443715  | AK076444  | Tcfcp2    | 21422  | transcription factor CP2                                  | 3.33 | 3.87 | 0.48 |
| A_51_P324110  | NM_144808 | Slc39a14  | 213053 | solute carrier family 39 (zinc transporter), member 14    | 3.11 | 3.86 | 0.70 |
| A_51_P419768  | NM_009061 | Rgs2      | 19735  | regulator of G-protein signaling 2                        | 3.44 | 3.85 | 0.40 |
| A_51_P494403  | AK046736  | Xaf1      | 327959 | XIAP associated factor 1                                  | 3.43 | 3.84 | 0.40 |
| A_51_P342916  | NM_020283 | B3galt1   | 26877  | UDP-Gal:betaGlcNAc beta 1,3-galactosyltransferase, poly   | 2.95 | 3.84 | 0.92 |
| A_51_P182794  | NM_009373 | Tgm2      | 21817  | transglutaminase 2, C polypeptide                         | 3.59 | 3.84 | 0.32 |
| A_52_P139579  | NM_011710 | Wars      | 22375  | tryptophanyl-tRNA synthetase                              | 3.11 | 3.84 | 0.70 |
| A_52_P61786   | NM_008211 | H3f3b     | 15081  | H3 histone, family 3B                                     | 2.95 | 3.84 | 0.92 |
| A_51_P417952  | NM_013662 | Sema6b    | 20359  | sema domain, transmembrane domain (TM), and cytopla       | 4.12 | 3.83 | 0.14 |
| A_51_P248666  | NM_021893 | Cd274     | 60533  | CD274 antigen                                             | 3.45 | 3.83 | 0.40 |
| A_51_P155052  | NM_053247 | Lyve1     | 114332 | lymphatic vessel endothelial hyaluronan receptor 1        | 4.15 | 3.83 | 0.15 |
| A_51_P159610  | NM_207202 | Ccdc120   | 54648  | coiled-coil domain containing 120                         | 4.55 | 3.82 | 0.09 |

|              |           |          |        |                                                           |      |      |      |
|--------------|-----------|----------|--------|-----------------------------------------------------------|------|------|------|
| A_51_P483180 | AK170966  | Snx7     | 76561  | sorting nexin 7                                           | 5.61 | 3.82 | 0.00 |
| A_51_P367060 | NM_013562 | Ifrd1    | 15982  | interferon-related developmental regulator 1              | 3.35 | 3.82 | 0.47 |
| A_51_P345366 | NM_010724 | Psmb8    | 16913  | proteasome (prosome, macropain) subunit, beta type 8 (    | 5.11 | 3.80 | 0.00 |
| A_52_P302108 | NM_153398 | Zbtb24   | 268294 | zinc finger and BTB domain containing 24                  | 4.19 | 3.80 | 0.12 |
| A_51_P357696 | AK013342  | Puf60    | 67959  | poly-U binding splicing factor 60                         | 3.78 | 3.79 | 0.25 |
| A_51_P110173 | NM_025454 | Ing5     | 66262  | inhibitor of growth family, member 5                      | 4.00 | 3.79 | 0.18 |
| A_52_P49797  | NA        | NA       | NA     | NA                                                        | 3.45 | 3.79 | 0.40 |
| A_51_P429197 | NM_013767 | Csnk1e   | 27373  | casein kinase 1, epsilon                                  | 3.61 | 3.79 | 0.31 |
| A_52_P283628 | NM_148945 | Rps6ka3  | 110651 | ribosomal protein S6 kinase polypeptide 3                 | 3.79 | 3.78 | 0.23 |
| A_51_P144090 | NM_030696 | Slc16a3  | 80879  | solute carrier family 16 (monocarboxylic acid transporter | 3.64 | 3.77 | 0.31 |
| A_51_P288138 | NM_008039 | Fpr2     | 14289  | formyl peptide receptor 2                                 | 4.24 | 3.76 | 0.13 |
| A_51_P457306 | NM_015775 | Tmprss2  | 50528  | transmembrane protease, serine 2                          | 4.65 | 3.75 | 0.05 |
| A_52_P337357 | NM_145211 | Oas1a    | 246730 | 2'-5' oligoadenylate synthetase 1A                        | 3.61 | 3.74 | 0.31 |
| A_51_P427264 | NM_181039 | Lphn1    | 330814 | latrophilin 1                                             | 5.06 | 3.74 | 0.09 |
| A_51_P250378 | NM_009579 | Slc30a1  | 22782  | solute carrier family 30 (zinc transporter), member 1     | 3.70 | 3.74 | 0.27 |
| A_52_P669155 | AK170324  | Itgam    | 16409  | integrin alpha M                                          | 7.39 | 3.74 | 0.00 |
| A_51_P279505 | NM_019743 | Rybp     | 56353  | RING1 and YY1 binding protein                             | 3.38 | 3.71 | 0.44 |
| A_52_P693104 | AV147182  | NA       | NA     | NA                                                        | 5.14 | 3.71 | 0.00 |
| A_51_P112405 | NM_011113 | Plaur    | 18793  | plasminogen activator, urokinase receptor                 | 3.43 | 3.70 | 0.40 |
| A_51_P272106 | NM_007705 | Cirbp    | 12696  | cold inducible RNA binding protein                        | 3.05 | 3.70 | 0.76 |
| A_52_P414464 | NM_207649 | Rcan2    | 53901  | regulator of calcineurin 2                                | 4.58 | 3.68 | 0.09 |
| A_51_P362863 | NM_021525 | Rcl1     | 59028  | RNA terminal phosphate cyclase-like 1                     | 3.28 | 3.68 | 0.53 |
| A_52_P478025 | NM_021491 | Smpd3    | 58994  | sphingomyelin phosphodiesterase 3, neutral                | 3.98 | 3.67 | 0.17 |
| A_52_P245119 | NM_009196 | Slc16a1  | 20501  | solute carrier family 16 (monocarboxylic acid transporter | 3.33 | 3.67 | 0.49 |
| A_52_P241484 | NM_021525 | Rcl1     | 59028  | RNA terminal phosphate cyclase-like 1                     | 3.40 | 3.66 | 0.42 |
| A_51_P201338 | NM_144800 | Mtss1    | 211401 | metastasis suppressor 1                                   | 3.46 | 3.66 | 0.38 |
| A_51_P136277 | NM_027874 | Csnk1d   | 104318 | casein kinase 1, delta                                    | 3.72 | 3.66 | 0.27 |
| A_51_P370720 | NM_024290 | Tnfrsf23 | 79201  | tumor necrosis factor receptor superfamily, member 23     | 4.06 | 3.65 | 0.16 |
| A_52_P8953   | NM_133669 | Rp2h     | 19889  | retinitis pigmentosa 2 homolog (human)                    | 4.50 | 3.64 | 0.09 |
| A_52_P570266 | NM_013640 | Psmb10   | 19171  | proteasome (prosome, macropain) subunit, beta type 10     | 4.59 | 3.62 | 0.09 |
| A_51_P319917 | NM_007403 | Adam8    | 11501  | a disintegrin and metallopeptidase domain 8               | 4.05 | 3.62 | 0.16 |
| A_51_P325904 | NM_008381 | Inhbb    | 16324  | inhibin beta-B                                            | 2.96 | 3.62 | 0.92 |
| A_51_P432180 | NM_001029 | Slc16a6  | 104681 | solute carrier family 16 (monocarboxylic acid transporter | 3.74 | 3.61 | 0.26 |
| A_52_P840743 | NA        | NA       | NA     | NA                                                        | 4.85 | 3.61 | 0.06 |



|               |                           |        |                                                         |      |      |      |
|---------------|---------------------------|--------|---------------------------------------------------------|------|------|------|
| A_52_P1026777 | NM_001033: Ecscr          | 68545  | endothelial cell-specific chemotaxis regulator          | 4.17 | 3.61 | 0.12 |
| A_51_P291417  | NM_009378 Thbd            | 21824  | thrombomodulin                                          | 3.14 | 3.61 | 0.67 |
| A_51_P268983  | XM_144099 Myom3           | 242702 | myomesin family, member 3                               | 3.91 | 3.60 | 0.21 |
| A_52_P317524  | NM_153165 Khlh15          | 236904 | kelch-like 15 (Drosophila)                              | 4.15 | 3.58 | 0.15 |
| A_52_P417890  | NM_010555 Il1r2           | 16178  | interleukin 1 receptor, type II                         | 3.43 | 3.58 | 0.40 |
| A_52_P210511  | NM_011612 Tnfrsf9         | 21942  | tumor necrosis factor receptor superfamily, member 9    | 3.94 | 3.57 | 0.19 |
| A_52_P646663  | NA NA                     | NA     | NA                                                      | 4.17 | 3.56 | 0.12 |
| A_51_P201982  | NM_007426 Angpt2          | 11601  | angiopoietin 2                                          | 3.35 | 3.56 | 0.47 |
| A_51_P126437  | NM_007930 Enc1            | 13803  | ectodermal-neural cortex 1                              | 3.01 | 3.56 | 0.82 |
| A_52_P228491  | NM_001025: Lrig2          | 269473 | leucine-rich repeats and immunoglobulin-like domains 2  | 3.55 | 3.56 | 0.34 |
| A_51_P320852  | NM_007657 Cd9             | 12527  | CD9 antigen                                             | 4.83 | 3.55 | 0.06 |
| A_52_P35895   | NM_001035: Akap2          | 11641  | A kinase (PRKA) anchor protein 2                        | 3.60 | 3.55 | 0.32 |
| A_52_P681787  | NM_007805 Cyb561          | 13056  | cytochrome b-561                                        | 4.63 | 3.54 | 0.05 |
| A_51_P490397  | NM_133692 Pold3           | 67967  | polymerase (DNA-directed), delta 3, accessory subunit   | 4.34 | 3.54 | 0.11 |
| A_52_P469502  | NM_028176 Cda             | 72269  | cytidine deaminase                                      | 3.36 | 3.52 | 0.46 |
| A_52_P500027  | NM_017373 Nfil3           | 18030  | nuclear factor, interleukin 3, regulated                | 3.09 | 3.52 | 0.71 |
| A_52_P502267  | NM_172663 Epc2            | 227867 | enhancer of polycomb homolog 2 (Drosophila)             | 3.30 | 3.50 | 0.52 |
| A_52_P646602  | NM_027815 9030624J0:71517 |        | RIKEN cDNA 9030624J02 gene                              | 3.96 | 3.50 | 0.17 |
| A_52_P642207  | NM_018810 Mkrn1           | 54484  | makorin, ring finger protein, 1                         | 6.40 | 3.50 | 0.00 |
| A_51_P193000  | NM_175325 Bbs4            | 102774 | Bardet-Biedl syndrome 4 (human)                         | 3.28 | 3.50 | 0.53 |
| A_51_P268053  | NM_008696 Map4k4          | 26921  | mitogen-activated protein kinase kinase kinase kinase 4 | 4.36 | 3.49 | 0.11 |
| A_51_P142529  | NM_011316 Saa4            | 20211  | serum amyloid A 4                                       | 4.89 | 3.49 | 0.07 |
| A_52_P310530  | NM_053104 Rbm9            | 93686  | RNA binding motif protein 9                             | 5.00 | 3.48 | 0.08 |
| A_52_P318673  | NM_009117 Saa1            | 20208  | serum amyloid A 1                                       | 3.63 | 3.48 | 0.31 |
| A_52_P306305  | NM_001035: Akap2          | 11641  | A kinase (PRKA) anchor protein 2                        | 3.71 | 3.48 | 0.28 |
| A_51_P224227  | XM_900563 NA              | NA     | NA                                                      | 3.77 | 3.47 | 0.25 |
| A_52_P477369  | NM_139059 Csnk1d          | 104318 | casein kinase 1, delta                                  | 3.75 | 3.47 | 0.26 |
| A_52_P563825  | NM_020283 B3galt1         | 26877  | UDP-Gal:betaGlcNAc beta 1,3-galactosyltransferase, poly | 3.19 | 3.46 | 0.60 |
| A_51_P161362  | NM_145552 Gnl2            | 230737 | guanine nucleotide binding protein-like 2 (nucleolar)   | 4.04 | 3.46 | 0.16 |
| A_51_P491987  | NM_019955 Ripk3           | 56532  | receptor-interacting serine-threonine kinase 3          | 5.48 | 3.46 | 0.00 |
| A_52_P412167  | NM_080467 Atp6v0a4        | 140494 | ATPase, H+ transporting, lysosomal V0 subunit A4        | 4.92 | 3.46 | 0.07 |
| A_52_P218058  | NM_001038: Clec5a         | 23845  | C-type lectin domain family 5, member a                 | 5.74 | 3.45 | 0.00 |
| A_52_P398989  | NM_139200 Cytip           | 227929 | cytohesin 1 interacting protein                         | 3.58 | 3.45 | 0.33 |
| A_52_P266132  | NM_008013 Fgl2            | 14190  | fibrinogen-like protein 2                               | 4.06 | 3.45 | 0.16 |

|              |           |           |        |                                                           |      |      |      |
|--------------|-----------|-----------|--------|-----------------------------------------------------------|------|------|------|
| A_52_P85864  | NM_010579 | Eif6      | 16418  | eukaryotic translation initiation factor 6                | 4.21 | 3.45 | 0.13 |
| A_52_P511821 | NM_027057 | Wdfy1     | 69368  | WD repeat and FYVE domain containing 1                    | 5.00 | 3.44 | 0.08 |
| A_51_P305950 | NM_013501 | Cryaa     | 12954  | crystallin, alpha A                                       | 3.14 | 3.43 | 0.66 |
| A_52_P652094 | NM_022028 | Sav1      | 64010  | salvador homolog 1 (Drosophila)                           | 3.54 | 3.43 | 0.34 |
| A_51_P304500 | NM_001025 | Tapbp     | 21356  | TAP binding protein                                       | 5.39 | 3.43 | 0.00 |
| A_51_P312795 | NM_008428 | Kcnj8     | 16523  | potassium inwardly-rectifying channel, subfamily J, mem   | 3.77 | 3.42 | 0.25 |
| A_52_P527800 | NM_145158 | Emilin2   | 246707 | elastin microfibril interfacier 2                         | 5.52 | 3.42 | 0.00 |
| A_52_P450236 | NM_172713 | Sdad1     | 231452 | SDA1 domain containing 1                                  | 4.10 | 3.41 | 0.14 |
| A_51_P463562 | NM_008620 | Gbp4      | 17472  | guanylate binding protein 4                               | 3.37 | 3.41 | 0.45 |
| A_51_P429335 | NM_019429 | Prss16    | 54373  | protease, serine, 16 (thymus)                             | 3.22 | 3.41 | 0.58 |
| A_52_P117408 | NM_009375 | Tg        | 21819  | thyroglobulin                                             | 4.26 | 3.41 | 0.10 |
| A_51_P246317 | NM_008630 | Mt2       | 17750  | metallothionein 2                                         | 3.14 | 3.40 | 0.67 |
| A_52_P589023 | NM_027123 | Fastkd3   | 69577  | FAST kinase domains 3                                     | 3.51 | 3.39 | 0.36 |
| A_51_P438820 | NM_023258 | Pycard    | 66824  | PYD and CARD domain containing                            | 4.56 | 3.39 | 0.09 |
| A_52_P924359 | NA        | NA        | NA     | NA                                                        | 4.30 | 3.39 | 0.11 |
| A_51_P300054 | XM_986054 | 4933440N2 | 74471  | RIKEN cDNA 4933440N22 gene                                | 4.03 | 3.38 | 0.16 |
| A_51_P327261 | NM_021327 | Tnip1     | 57783  | TNFAIP3 interacting protein 1                             | 3.77 | 3.37 | 0.25 |
| A_52_P625880 | AK029366  | Tmem209   | 72649  | transmembrane protein 209                                 | 4.85 | 3.36 | 0.06 |
| A_51_P481210 | NM_177429 | Ofd1      | 237222 | oral-facial-digital syndrome 1 gene homolog (human)       | 3.93 | 3.36 | 0.19 |
| A_52_P180373 | XM_129176 | NA        | NA     | NA                                                        | 5.13 | 3.36 | 0.00 |
| A_51_P327511 | NM_008013 | Fgl2      | 14190  | fibrinogen-like protein 2                                 | 4.01 | 3.36 | 0.18 |
| A_52_P509710 | NM_025635 | Zwint     | 52696  | ZW10 interactor                                           | 3.89 | 3.36 | 0.21 |
| A_51_P116601 | NM_172447 | A330021E2 | 207686 | RIKEN cDNA A330021E22 gene                                | 3.08 | 3.36 | 0.72 |
| A_51_P519251 | NM_019738 | Nupr1     | 56312  | nuclear protein 1                                         | 3.71 | 3.35 | 0.28 |
| A_52_P117352 | NM_008120 | Gja4      | 14612  | gap junction protein, alpha 4                             | 3.51 | 3.34 | 0.36 |
| A_51_P401797 | NM_013599 | Mmp9      | 17395  | matrix metalloproteinase 9                                | 5.02 | 3.33 | 0.08 |
| A_52_P371946 | NM_010579 | Eif6      | 16418  | eukaryotic translation initiation factor 6                | 3.85 | 3.32 | 0.22 |
| A_52_P645275 | BC085283  | NA        | NA     | NA                                                        | 4.69 | 3.31 | 0.05 |
| A_51_P315754 | NM_028315 | Dis3      | 72662  | DIS3 mitotic control homolog (S. cerevisiae)              | 3.95 | 3.31 | 0.19 |
| A_52_P222073 | NM_021609 | Ccbp2     | 59289  | chemokine binding protein 2                               | 4.73 | 3.31 | 0.06 |
| A_51_P235835 | NA        | NA        | NA     | NA                                                        | 7.07 | 3.31 | 0.00 |
| A_51_P336833 | NM_024406 | Fabp4     | 11770  | fatty acid binding protein 4, adipocyte                   | 3.46 | 3.31 | 0.40 |
| A_51_P193336 | NM_016773 | Nucb2     | 53322  | nucleobindin 2                                            | 4.98 | 3.31 | 0.08 |
| A_51_P354265 | NM_009256 | Serpinb9  | 20723  | serine (or cysteine) peptidase inhibitor, clade B, member | 3.95 | 3.31 | 0.19 |

|              |           |          |        |                                                        |      |      |      |
|--------------|-----------|----------|--------|--------------------------------------------------------|------|------|------|
| A_51_P154842 | NM_145153 | Oas1f    | 243262 | 2'-5' oligoadenylate synthetase 1F                     | 3.69 | 3.30 | 0.29 |
| A_51_P519295 | NM_009817 | Cast     | 12380  | calpastatin                                            | 3.15 | 3.30 | 0.65 |
| A_52_P86693  | NM_026790 | Ifi2711  | 52668  | interferon, alpha-inducible protein 27 like 1          | 7.04 | 3.30 | 0.00 |
| A_51_P285462 | NM_146276 | Olfr1394 | 258273 | olfactory receptor 1394                                | 3.90 | 3.30 | 0.21 |
| A_52_P669510 | NA        | NA       | NA     | NA                                                     | 6.11 | 3.29 | 0.00 |
| A_51_P398878 | NM_030724 | Uck2     | 80914  | uridine-cytidine kinase 2                              | 3.17 | 3.28 | 0.63 |
| A_51_P112966 | NM_009890 | Ch25h    | 12642  | cholesterol 25-hydroxylase                             | 3.71 | 3.28 | 0.28 |
| A_51_P166886 | NM_011314 | Saa2     | 20209  | serum amyloid A 2                                      | 3.40 | 3.27 | 0.42 |
| A_51_P172292 | NM_018746 | Itih4    | 16427  | inter alpha-trypsin inhibitor, heavy chain 4           | 5.32 | 3.27 | 0.00 |
| A_51_P341647 | NM_007985 | Fancc    | 14088  | Fanconi anemia, complementation group C                | 3.08 | 3.27 | 0.71 |
| A_52_P8922   | NM_009229 | Sntb2    | 20650  | syntrophin, basic 2                                    | 3.72 | 3.27 | 0.27 |
| A_51_P346964 | NM_029844 | Mrap     | 77037  | melanocortin 2 receptor accessory protein              | 3.10 | 3.26 | 0.70 |
| A_51_P331279 | NM_023142 | Arpc1b   | 11867  | actin related protein 2/3 complex, subunit 1B          | 6.34 | 3.26 | 0.00 |
| A_52_P153189 | NM_024269 | Arl2bp   | 107566 | ADP-ribosylation factor-like 2 binding protein         | 6.54 | 3.25 | 0.00 |
| A_51_P262238 | NM_021885 | Tub      | 22141  | tubby candidate gene                                   | 3.17 | 3.25 | 0.63 |
| A_51_P485828 | NM_007880 | Arid3a   | 13496  | AT rich interactive domain 3A (BRIGHT-like)            | 5.10 | 3.24 | 0.00 |
| A_51_P189151 | AK028396  | Kbtbd2   | 210973 | kelch repeat and BTB (POZ) domain containing 2         | 3.27 | 3.24 | 0.53 |
| A_51_P499940 | NM_008252 | Hmgb2    | 97165  | high mobility group box 2                              | 3.29 | 3.23 | 0.52 |
| A_52_P170486 | NM_028259 | Rps6kb1  | 72508  | ribosomal protein S6 kinase, polypeptide 1             | 4.31 | 3.23 | 0.11 |
| A_51_P164347 | XM_912670 | NA       | NA     | NA                                                     | 5.36 | 3.23 | 0.00 |
| A_52_P571938 | NM_026855 | Arv1     | 68865  | ARV1 homolog (yeast)                                   | 3.61 | 3.23 | 0.31 |
| A_52_P607230 | NM_010740 | Cd93     | 17064  | CD93 antigen                                           | 5.80 | 3.22 | 0.00 |
| A_51_P102740 | AK084873  | NA       | NA     | NA                                                     | 2.89 | 3.22 | 1.02 |
| A_51_P412160 | NM_172572 | Rhbdf2   | 217344 | rhomboid 5 homolog 2 (Drosophila)                      | 3.03 | 3.21 | 0.79 |
| A_51_P421912 | NM_145711 | Tox      | 252838 | thymocyte selection-associated high mobility group box | 3.24 | 3.21 | 0.56 |
| A_51_P361448 | NM_028903 | Scara5   | 71145  | scavenger receptor class A, member 5 (putative)        | 3.39 | 3.21 | 0.44 |
| A_51_P360492 | NM_008567 | Mcm6     | 17219  | minichromosome maintenance deficient 6 (MIS5 homolog)  | 3.33 | 3.21 | 0.48 |
| A_51_P320593 | NM_027185 | Def6     | 23853  | differentially expressed in FDCP 6                     | 8.12 | 3.21 | 0.00 |
| A_52_P186033 | NM_009259 | Spn      | 20737  | sialophorin                                            | 5.49 | 3.21 | 0.00 |
| A_51_P177392 | AB041546  | Tacc2    | 57752  | transforming, acidic coiled-coil containing protein 2  | 3.14 | 3.20 | 0.67 |
| A_51_P454873 | NM_023456 | Npy      | 109648 | neuropeptide Y                                         | 2.90 | 3.20 | 0.99 |
| A_51_P517843 | NM_027450 | Glipr2   | 384009 | GLI pathogenesis-related 2                             | 3.72 | 3.20 | 0.27 |
| A_52_P35057  | XM_900689 | NA       | NA     | NA                                                     | 8.40 | 3.19 | 0.00 |
| A_51_P228232 | NM_008028 | Flot2    | 14252  | flotillin 2                                            | 5.41 | 3.19 | 0.00 |

|              |           |                 |        |                                                           |      |      |      |
|--------------|-----------|-----------------|--------|-----------------------------------------------------------|------|------|------|
| A_51_P367310 | NM_028083 | Chaf1b          | 110749 | chromatin assembly factor 1, subunit B (p60)              | 3.68 | 3.19 | 0.29 |
| A_52_P653406 | NA        | NA              | NA     | NA                                                        | 2.93 | 3.18 | 0.96 |
| A_52_P650387 | NM_001045 | Ccnj1           | 380694 | cyclin J-like                                             | 4.91 | 3.18 | 0.07 |
| A_52_P525307 | BC031426  | NA              | NA     | NA                                                        | 3.55 | 3.18 | 0.34 |
| A_51_P339824 | NM_177700 | Atmin           | 234776 | ATM interactor                                            | 3.66 | 3.17 | 0.29 |
| A_51_P105078 | NM_011311 | S100a4          | 20198  | S100 calcium binding protein A4                           | 2.96 | 3.16 | 0.91 |
| A_52_P549405 | NM_001039 | Asxl1           | 228790 | additional sex combs like 1 (Drosophila)                  | 3.59 | 3.16 | 0.32 |
| A_51_P499838 | NM_009763 | Bst1            | 12182  | bone marrow stromal cell antigen 1                        | 4.10 | 3.16 | 0.14 |
| A_52_P46310  | NM_027946 | Dcaf7           | 71833  | DDB1 and CUL4 associated factor 7                         | 4.76 | 3.16 | 0.06 |
| A_51_P297388 | NM_027733 | Spata24         | 71242  | spermatogenesis associated 24                             | 4.40 | 3.15 | 0.10 |
| A_52_P584058 | NM_001039 | Ivns1abp        | 117198 | influenza virus NS1A binding protein                      | 5.48 | 3.15 | 0.00 |
| A_51_P333274 | NM_013542 | Gzmb            | 14939  | granzyme B                                                | 3.36 | 3.15 | 0.46 |
| A_52_P417825 | NM_145950 | Osgin2          | 209212 | oxidative stress induced growth inhibitor family member   | 3.75 | 3.15 | 0.26 |
| A_51_P273921 | NM_007599 | Capg            | 12332  | capping protein (actin filament), gelsolin-like           | 4.17 | 3.14 | 0.12 |
| A_51_P208121 | NM_182782 | Klhl25          | 207952 | kelch-like 25 (Drosophila)                                | 3.14 | 3.14 | 0.67 |
| A_51_P339943 | NM_010917 | Nid1            | 18073  | nidogen 1                                                 | 6.49 | 3.14 | 0.00 |
| A_52_P392509 | AK018404  | Gin1            | 252876 | gypsy retrotransposon integrase 1                         | 2.99 | 3.14 | 0.85 |
| A_52_P195107 | NM_021359 | Irgb6           | 16420  | integrin beta 6                                           | 3.64 | 3.14 | 0.31 |
| A_51_P208603 | NM_010050 | Dio2            | 13371  | deiodinase, iodothyronine, type II                        | 3.94 | 3.14 | 0.19 |
| A_52_P195839 | NM_009982 | Ctsc            | 13032  | cathepsin C                                               | 3.75 | 3.13 | 0.26 |
| A_51_P123216 | NM_029492 | Zdhhc20         | 75965  | zinc finger, DHHC domain containing 20                    | 4.24 | 3.13 | 0.13 |
| A_51_P511787 | NM_007609 | Casp4           | 12363  | caspase 4, apoptosis-related cysteine peptidase           | 3.75 | 3.13 | 0.26 |
| A_52_P424308 | NM_176998 | 5730410E1319613 |        | RIKEN cDNA 5730410E15 gene                                | 3.52 | 3.13 | 0.35 |
| A_52_P655778 | XR_002713 | NA              | NA     | NA                                                        | 3.70 | 3.12 | 0.27 |
| A_52_P77332  | NM_022655 | Ireb2           | 64602  | iron responsive element binding protein 2                 | 3.20 | 3.12 | 0.60 |
| A_51_P416910 | NM_172289 | Slc36a4         | 234967 | solute carrier family 36 (proton/amino acid symporter), r | 4.00 | 3.11 | 0.18 |
| A_52_P535195 | AK139506  | Gpbp1l1         | 77110  | GC-rich promoter binding protein 1-like 1                 | 3.78 | 3.11 | 0.25 |
| A_51_P423091 | NM_008027 | Flot1           | 14251  | flotillin 1                                               | 4.20 | 3.10 | 0.13 |
| A_51_P446232 | NM_019813 | Dbn1            | 56320  | drebrin 1                                                 | 3.36 | 3.10 | 0.46 |
| A_51_P293781 | NM_016863 | Fkbp1b          | 14226  | FK506 binding protein 1b                                  | 4.37 | 3.10 | 0.11 |
| A_51_P507801 | NM_028784 | F13a1           | 74145  | coagulation factor XIII, A1 subunit                       | 4.02 | 3.10 | 0.18 |
| A_51_P382849 | NM_010330 | Emb             | 13723  | embigin                                                   | 5.25 | 3.09 | 0.00 |
| A_51_P155935 | NM_144905 | 6330416G1230279 |        | RIKEN cDNA 6330416G13 gene                                | 3.33 | 3.09 | 0.48 |
| A_51_P482425 | NM_152815 | Lins2           | 72635  | lines homolog 2 (Drosophila)                              | 5.03 | 3.08 | 0.08 |

|              |           |           |        |                                                             |      |      |      |
|--------------|-----------|-----------|--------|-------------------------------------------------------------|------|------|------|
| A_52_P665742 | BC069989  | Sreb2     | 20788  | sterol regulatory element binding factor 2                  | 4.63 | 3.08 | 0.05 |
| A_51_P518378 | NM_007404 | Adam9     | 11502  | a disintegrin and metallopeptidase domain 9 (meltrin gamma) | 4.25 | 3.08 | 0.10 |
| A_52_P238159 | BC042188  | Gm9975    | 327988 | predicted gene 9975                                         | 2.91 | 3.08 | 0.98 |
| A_51_P172054 | NM_019521 | Gas6      | 14456  | growth arrest specific 6                                    | 3.62 | 3.08 | 0.31 |
| A_51_P454008 | NM_008489 | Lbp       | 16803  | lipopolysaccharide binding protein                          | 3.99 | 3.08 | 0.18 |
| A_52_P497235 | NM_026985 | 1810033B1 | 69189  | RIKEN cDNA 1810033B17 gene                                  | 3.80 | 3.08 | 0.24 |
| A_51_P338443 | NM_020581 | Angptl4   | 57875  | angiopoietin-like 4                                         | 3.38 | 3.07 | 0.45 |
| A_51_P104418 | NM_022019 | Dusp10    | 63953  | dual specificity phosphatase 10                             | 3.69 | 3.07 | 0.29 |
| A_52_P213932 | NM_009621 | Adamts1   | 11504  | a disintegrin-like and metallopeptidase (reprolysin type) 1 | 4.61 | 3.07 | 0.05 |
| A_52_P82765  | NA        | NA        | NA     | NA                                                          | 3.83 | 3.07 | 0.23 |
| A_51_P336830 | NM_024406 | Fabp4     | 11770  | fatty acid binding protein 4, adipocyte                     | 3.15 | 3.07 | 0.66 |
| A_51_P167979 | XM_001003 | NA        | NA     | NA                                                          | 5.17 | 3.07 | 0.00 |
| A_51_P440092 | NM_175240 | Fam187b   | 76415  | family with sequence similarity 187, member B               | 5.30 | 3.07 | 0.00 |
| A_51_P376445 | NM_008818 | Rhox5     | 18617  | reproductive homeobox 5                                     | 3.28 | 3.06 | 0.53 |
| A_51_P193011 | NM_001025 | NA        | NA     | NA                                                          | 4.77 | 3.06 | 0.06 |
| A_52_P129354 | NM_175325 | Bbs4      | 102774 | Bardet-Biedl syndrome 4 (human)                             | 3.09 | 3.06 | 0.71 |
| A_51_P314547 | AK019935  | NA        | NA     | NA                                                          | 3.18 | 3.06 | 0.62 |
| A_52_P149864 | NM_016957 | Hmgn2     | 15331  | high mobility group nucleosomal binding domain 2            | 3.98 | 3.06 | 0.17 |
| A_51_P394190 | NM_010723 | Lmo4      | 16911  | LIM domain only 4                                           | 3.29 | 3.05 | 0.52 |
| A_52_P365434 | BC051182  | D5Ert579c | 320661 | DNA segment, Chr 5, ERATO Doi 579, expressed                | 4.09 | 3.05 | 0.17 |
| A_52_P151853 | NM_001025 | Tpd52     | 21985  | tumor protein D52                                           | 4.53 | 3.05 | 0.09 |
| A_51_P354154 | NM_028003 | Rpap3     | 71919  | RNA polymerase II associated protein 3                      | 4.65 | 3.05 | 0.05 |
| A_51_P161612 | NM_009831 | Ccng1     | 12450  | cyclin G1                                                   | 6.47 | 3.05 | 0.00 |
| A_52_P579580 | NA        | NA        | NA     | NA                                                          | 3.99 | 3.04 | 0.18 |
| A_51_P103819 | NM_144551 | Trib2     | 217410 | tribbles homolog 2 (Drosophila)                             | 4.04 | 3.04 | 0.16 |
| A_51_P184672 | U21674    | Tcte3     | 21647  | t-complex-associated testis expressed 3                     | 3.36 | 3.03 | 0.46 |
| A_51_P421140 | NM_026473 | Tubb6     | 67951  | tubulin, beta 6                                             | 3.02 | 3.03 | 0.79 |
| A_51_P317427 | NM_177420 | Psat1     | 107272 | phosphoserine aminotransferase 1                            | 3.87 | 3.02 | 0.20 |
| A_51_P343350 | NM_033603 | Amn       | 93835  | amnionless                                                  | 5.72 | 3.02 | 0.00 |
| A_51_P389751 | NM_009046 | Relb      | 19698  | avian reticuloendotheliosis viral (v-rel) oncogene related  | 3.13 | 3.02 | 0.67 |
| A_51_P375680 | XM_129214 | Pcsk5     | 18552  | proprotein convertase subtilisin/kexin type 5               | 4.49 | 3.02 | 0.09 |
| A_51_P166648 | NM_027627 | 4931408AC | 70967  | RIKEN cDNA 4931408A02 gene                                  | 4.61 | 3.02 | 0.05 |
| A_52_P247788 | NM_172625 | Ino80c    | 225280 | INO80 complex subunit C                                     | 4.53 | 3.02 | 0.09 |
| A_52_P614888 | NM_022028 | Sav1      | 64010  | salvador homolog 1 (Drosophila)                             | 3.10 | 3.01 | 0.70 |

|              |           |           |        |                                                            |      |      |      |
|--------------|-----------|-----------|--------|------------------------------------------------------------|------|------|------|
| A_51_P284793 | NM_027927 | Ints12    | 71793  | integrator complex subunit 12                              | 3.63 | 3.01 | 0.31 |
| A_51_P273157 | NM_023898 | Pde6h     | 78600  | phosphodiesterase 6H, cGMP-specific, cone, gamma           | 3.24 | 3.01 | 0.56 |
| A_51_P193146 | NM_028595 | Ms4a6c    | 73656  | membrane-spanning 4-domains, subfamily A, member 6c        | 3.80 | 3.01 | 0.24 |
| A_52_P104761 | NM_011276 | Rlim      | 19820  | ring finger protein, LIM domain interacting                | 2.97 | 3.01 | 0.89 |
| A_51_P235687 | NM_009663 | Alox5ap   | 11690  | arachidonate 5-lipoxygenase activating protein             | 4.77 | 3.00 | 0.06 |
| A_52_P68440  | NA        | NA        | NA     | NA                                                         | 4.36 | 3.00 | 0.11 |
| A_52_P236072 | NM_008636 | Mtf1      | 17764  | metal response element binding transcription factor 1      | 4.14 | 3.00 | 0.15 |
| A_51_P141315 | XM_902782 | NA        | NA     | NA                                                         | 4.65 | 3.00 | 0.05 |
| A_52_P522166 | BU509931  | 2810026P1 | 72655  | RIKEN cDNA 2810026P18 gene                                 | 3.43 | 3.00 | 0.40 |
| A_51_P146850 | NM_146131 | Pbxip1    | 229534 | pre-B-cell leukemia transcription factor interacting prote | 3.68 | 2.99 | 0.29 |
| A_51_P184928 | NM_028968 | lfitm7    | 74482  | interferon induced transmembrane protein 7                 | 5.55 | 2.99 | 0.00 |
| A_51_P474459 | NM_007707 | Socs3     | 12702  | suppressor of cytokine signaling 3                         | 2.90 | 2.99 | 0.99 |
| A_52_P68261  | NM_023898 | Pde6h     | 78600  | phosphodiesterase 6H, cGMP-specific, cone, gamma           | 2.92 | 2.98 | 0.98 |
| A_51_P248959 | XM_896388 | NA        | NA     | NA                                                         | 3.52 | 2.97 | 0.35 |
| A_51_P383032 | NM_010819 | Clec4d    | 17474  | C-type lectin domain family 4, member d                    | 3.77 | 2.97 | 0.25 |
| A_51_P384831 | NM_134164 | Syt12     | 171180 | synaptotagmin XII                                          | 3.53 | 2.96 | 0.34 |
| A_51_P359636 | NM_011150 | Lgals3bp  | 19039  | lectin, galactoside-binding, soluble, 3 binding protein    | 5.03 | 2.96 | 0.08 |
| A_51_P181517 | NM_144559 | Fcgr4     | 246256 | Fc receptor, IgG, low affinity IV                          | 3.69 | 2.96 | 0.29 |
| A_52_P395083 | AK156874  | NA        | NA     | NA                                                         | 3.06 | 2.96 | 0.76 |
| A_52_P144925 | NM_027261 | Taf1d     | 75316  | TATA box binding protein (Tbp)-associated factor, RNA p    | 4.55 | 2.96 | 0.09 |
| A_51_P236175 | NM_009069 | Rit1      | 19769  | Ras-like without CAAX 1                                    | 4.75 | 2.95 | 0.06 |
| A_52_P73134  | NM_130796 | Snx18     | 170625 | sorting nexin 18                                           | 3.87 | 2.95 | 0.20 |
| A_52_P134639 | NM_009444 | Tgoln2    | 22135  | trans-golgi network protein 2                              | 2.98 | 2.94 | 0.87 |
| A_51_P316816 | NM_023738 | Uba7      | 74153  | ubiquitin-like modifier activating enzyme 7                | 5.09 | 2.94 | 0.00 |
| A_51_P413088 | NA        | NA        | NA     | NA                                                         | 4.09 | 2.93 | 0.17 |
| A_52_P635388 | AB026047  | Ms4a6d    | 68774  | membrane-spanning 4-domains, subfamily A, member 6d        | 3.54 | 2.93 | 0.34 |
| A_52_P312904 | AK161527  | Pcbp2     | 18521  | poly(rC) binding protein 2                                 | 3.38 | 2.93 | 0.45 |
| A_52_P323852 | NM_023680 | Tnfrsf22  | 79202  | tumor necrosis factor receptor superfamily, member 22      | 3.00 | 2.93 | 0.85 |
| A_51_P326191 | NM_009251 | Serpina3g | 20715  | serine (or cysteine) peptidase inhibitor, clade A, member  | 3.35 | 2.92 | 0.46 |
| A_51_P128876 | NM_025378 | lfitm3    | 66141  | interferon induced transmembrane protein 3                 | 5.67 | 2.92 | 0.00 |
| A_51_P356283 | NM_133765 | Fbxo31    | 76454  | F-box protein 31                                           | 3.48 | 2.92 | 0.39 |
| A_52_P597775 | NM_181444 | Gprc5a    | 232431 | G protein-coupled receptor, family C, group 5, member A    | 4.41 | 2.92 | 0.08 |
| A_51_P333349 | NM_172541 | Tmem120a  | 215210 | transmembrane protein 120A                                 | 4.73 | 2.92 | 0.06 |
| A_51_P485312 | NM_013653 | Ccl5      | 20304  | chemokine (C-C motif) ligand 5                             | 3.56 | 2.91 | 0.35 |

|              |           |            |        |                                                           |      |      |      |
|--------------|-----------|------------|--------|-----------------------------------------------------------|------|------|------|
| A_51_P148093 | NM_008984 | Ptpm       | 19274  | protein tyrosine phosphatase, receptor type, M            | 3.62 | 2.91 | 0.31 |
| A_52_P128612 | NA        | NA         | NA     | NA                                                        | 3.36 | 2.91 | 0.46 |
| A_52_P119814 | NM_001004 | Slc13a5    | 237831 | solute carrier family 13 (sodium-dependent citrate transp | 3.53 | 2.91 | 0.34 |
| A_51_P245368 | NM_011075 | Abcb1b     | 18669  | ATP-binding cassette, sub-family B (MDR/TAP), member :    | 3.63 | 2.90 | 0.31 |
| A_51_P306608 | NM_029248 | Taf1d      | 75316  | TATA box binding protein (Tbp)-associated factor, RNA p   | 3.90 | 2.90 | 0.21 |
| A_51_P258150 | NM_007408 | Plin2      | 11520  | perilipin 2                                               | 4.25 | 2.90 | 0.13 |
| A_51_P317460 | NM_010824 | Mpo        | 17523  | myeloperoxidase                                           | 4.20 | 2.89 | 0.13 |
| A_51_P476820 | NM_028500 | Calr3      | 73316  | calreticulin 3                                            | 7.65 | 2.89 | 0.00 |
| A_51_P323081 | NM_198161 | Bhlhb9     | 70237  | basic helix-loop-helix domain containing, class B9        | 3.55 | 2.89 | 0.34 |
| A_52_P594750 | NM_021494 | Dennd5a    | 19347  | DENN/MADD domain containing 5A                            | 3.22 | 2.89 | 0.58 |
| A_52_P184160 | NA        | NA         | NA     | NA                                                        | 4.73 | 2.89 | 0.06 |
| A_51_P377237 | NM_021284 | Kras       | 16653  | v-Ki-ras2 Kirsten rat sarcoma viral oncogene homolog      | 3.94 | 2.89 | 0.19 |
| A_52_P601497 | AK053591  | Trim39     | 79263  | tripartite motif-containing 39                            | 4.44 | 2.88 | 0.08 |
| A_51_P386382 | NM_025858 | Shisa5     | 66940  | shisa homolog 5 ( <i>Xenopus laevis</i> )                 | 4.68 | 2.88 | 0.05 |
| A_51_P231320 | NM_008611 | Mmp8       | 17394  | matrix metalloproteinase 8                                | 3.68 | 2.88 | 0.29 |
| A_52_P120037 | NM_010128 | Emp1       | 13730  | epithelial membrane protein 1                             | 3.44 | 2.88 | 0.40 |
| A_52_P502717 | NM_176913 | Dpep2      | 319446 | dipeptidase 2                                             | 4.70 | 2.88 | 0.05 |
| A_52_P288873 | NM_029362 | Chmp4b     | 75608  | chromatin modifying protein 4B                            | 3.84 | 2.87 | 0.22 |
| A_51_P506356 | NM_026316 | Aldh3b1    | 67689  | aldehyde dehydrogenase 3 family, member B1                | 3.11 | 2.87 | 0.70 |
| A_51_P400784 | NM_001039 | Hnrnpa1    | 15382  | heterogeneous nuclear ribonucleoprotein A1                | 4.03 | 2.87 | 0.16 |
| A_52_P661071 | NR_003270 | Snhg3      | 399101 | small nucleolar RNA host gene (non-protein coding) 3      | 5.53 | 2.87 | 0.00 |
| A_51_P423578 | NM_011408 | Slfn2      | 20556  | schlafen 2                                                | 3.68 | 2.87 | 0.29 |
| A_52_P110052 | NM_010045 | Darc       | 13349  | Duffy blood group, chemokine receptor                     | 3.25 | 2.87 | 0.55 |
| A_52_P512817 | NM_025858 | Shisa5     | 66940  | shisa homolog 5 ( <i>Xenopus laevis</i> )                 | 4.94 | 2.86 | 0.07 |
| A_52_P232813 | NM_203320 | Cxcl3      | 330122 | chemokine (C-X-C motif) ligand 3                          | 3.27 | 2.86 | 0.53 |
| A_52_P161488 | NM_019948 | Clec4e     | 56619  | C-type lectin domain family 4, member e                   | 3.49 | 2.85 | 0.38 |
| A_51_P479818 | NM_028894 | Lonrf3     | 74365  | LON peptidase N-terminal domain and ring finger 3         | 3.82 | 2.85 | 0.24 |
| A_51_P254541 | NM_007527 | Bax        | 12028  | BCL2-associated X protein                                 | 4.58 | 2.85 | 0.09 |
| A_52_P50216  | NM_146043 | Spin1      | 20729  | spindlin 1                                                | 4.03 | 2.84 | 0.16 |
| A_52_P191059 | AK043395  | Zfp612     | 234725 | zinc finger protein 612                                   | 4.85 | 2.84 | 0.06 |
| A_52_P399934 | NM_010090 | Dusp2      | 13537  | dual specificity phosphatase 2                            | 3.64 | 2.84 | 0.31 |
| A_52_P454765 | NM_172286 | 6430548M08 | 234797 | RIKEN cDNA 6430548M08 gene                                | 4.44 | 2.84 | 0.08 |
| A_51_P159803 | NM_032002 | Nrg4       | 83961  | neuregulin 4                                              | 2.97 | 2.84 | 0.89 |
| A_51_P172231 | NM_026960 | Gsdmd      | 69146  | gasdermin D                                               | 6.26 | 2.84 | 0.00 |

|               |           |           |        |                                                        |      |      |      |
|---------------|-----------|-----------|--------|--------------------------------------------------------|------|------|------|
| A_51_P292057  | NM_030732 | Tbl1xr1   | 81004  | transducin (beta)-like 1X-linked receptor 1            | 3.80 | 2.84 | 0.24 |
| A_52_P563475  | NM_026160 | Map1lc3b  | 67443  | microtubule-associated protein 1 light chain 3 beta    | 4.45 | 2.84 | 0.08 |
| A_52_P501697  | NM_011890 | Sgcb      | 24051  | sarcoglycan, beta (dystrophin-associated glycoprotein) | 5.77 | 2.83 | 0.00 |
| A_52_P34979   | BC055805  | Epc1      | 13831  | enhancer of polycomb homolog 1 (Drosophila)            | 3.42 | 2.83 | 0.40 |
| A_51_P286737  | NM_011333 | Ccl2      | 20296  | chemokine (C-C motif) ligand 2                         | 3.44 | 2.82 | 0.40 |
| A_52_P657123  | NA        | NA        | NA     | NA                                                     | 6.09 | 2.82 | 0.00 |
| A_51_P399373  | AK150140  | Wasf2     | 242687 | WAS protein family, member 2                           | 4.47 | 2.81 | 0.08 |
| A_51_P200277  | NM_023475 | Serhl     | 68607  | serine hydrolase-like                                  | 5.10 | 2.81 | 0.00 |
| A_51_P372550  | BC023116  | Cgref1    | 68567  | cell growth regulator with EF hand domain 1            | 4.75 | 2.81 | 0.06 |
| A_52_P413035  | NM_013785 | Ip6k1     | 27399  | inositol hexaphosphate kinase 1                        | 4.62 | 2.81 | 0.05 |
| A_52_P371922  | XM_988404 | NA        | NA     | NA                                                     | 3.12 | 2.81 | 0.70 |
| A_51_P216702  | NM_175313 | A130022J1 | 101351 | RIKEN cDNA A130022J15 gene                             | 3.75 | 2.80 | 0.26 |
| A_51_P377452  | NM_008677 | Ncf4      | 17972  | neutrophil cytosolic factor 4                          | 3.39 | 2.80 | 0.44 |
| A_51_P307150  | NM_008324 | Ido1      | 15930  | indoleamine 2,3-dioxygenase 1                          | 3.93 | 2.80 | 0.19 |
| A_52_P940978  | W15861    | NA        | NA     | NA                                                     | 4.77 | 2.80 | 0.06 |
| A_52_P463977  | NM_197986 | Tmem140   | 68487  | transmembrane protein 140                              | 3.16 | 2.80 | 0.65 |
| A_52_P217100  | NA        | NA        | NA     | NA                                                     | 4.68 | 2.79 | 0.05 |
| A_51_P281593  | AK144593  | Ppapdc1b  | 71910  | phosphatidic acid phosphatase type 2 domain containing | 3.35 | 2.79 | 0.47 |
| A_52_P114282  | NM_001009 | Armcx5    | 494468 | armadillo repeat containing, X-linked 5                | 3.41 | 2.79 | 0.43 |
| A_52_P366696  | NM_026983 | Erp27     | 69187  | endoplasmic reticulum protein 27                       | 4.30 | 2.78 | 0.11 |
| A_51_P314907  | NM_013726 | Dbf4      | 27214  | DBF4 homolog (S. cerevisiae)                           | 3.71 | 2.78 | 0.28 |
| A_51_P153982  | NM_001029 | Cytsb     | 432572 | cytospin B                                             | 3.89 | 2.78 | 0.21 |
| A_51_P297679  | NM_008225 | Hcls1     | 15163  | hematopoietic cell specific Lyn substrate 1            | 4.71 | 2.78 | 0.06 |
| A_52_P15658   | NA        | NA        | NA     | NA                                                     | 4.54 | 2.77 | 0.09 |
| A_52_P471583  | NM_199068 | Foxk1     | 17425  | forkhead box K1                                        | 3.19 | 2.77 | 0.60 |
| A_52_P176245  | NM_010258 | Gata6     | 14465  | GATA binding protein 6                                 | 3.00 | 2.76 | 0.85 |
| A_51_P325165  | NM_145636 | Il27      | 246779 | interleukin 27                                         | 4.04 | 2.76 | 0.16 |
| A_51_P381260  | NM_008761 | Fxyd5     | 18301  | FXD domain-containing ion transport regulator 5        | 5.97 | 2.76 | 0.00 |
| A_52_P1193423 | XM_148801 | Prr22     | 224908 | proline rich 22                                        | 4.01 | 2.76 | 0.18 |
| A_51_P427563  | NM_025815 | Cpne8     | 66871  | copine VIII                                            | 3.04 | 2.76 | 0.79 |
| A_52_P110070  | AK017567  | 5730416F0 | 70550  | RIKEN cDNA 5730416F02 gene                             | 3.59 | 2.75 | 0.32 |
| A_51_P172573  | NM_013671 | Sod2      | 20656  | superoxide dismutase 2, mitochondrial                  | 4.96 | 2.75 | 0.07 |
| A_51_P372826  | NM_145533 | Smox      | 228608 | spermine oxidase                                       | 4.47 | 2.75 | 0.08 |
| A_52_P648203  | XM_619304 | NA        | NA     | NA                                                     | 3.06 | 2.75 | 0.75 |



|              |           |                 |                                                              |      |      |      |
|--------------|-----------|-----------------|--------------------------------------------------------------|------|------|------|
| A_52_P275864 | NM_144905 | 6330416G1230279 | RIKEN cDNA 6330416G13 gene                                   | 4.52 | 2.75 | 0.09 |
| A_51_P265999 | NM_146238 | Gemin8 237221   | gem (nuclear organelle) associated protein 8                 | 3.64 | 2.75 | 0.30 |
| A_51_P515883 | NM_139198 | Plac8 231507    | placenta-specific 8                                          | 3.54 | 2.75 | 0.34 |
| A_52_P112021 | NM_172289 | Slc36a4 234967  | solute carrier family 36 (proton/amino acid symporter), r    | 5.87 | 2.74 | 0.00 |
| A_51_P305770 | NM_145158 | Emilin2 246707  | elastin microfibril interfacier 2                            | 4.43 | 2.74 | 0.08 |
| A_52_P284658 | NM_029976 | Cdkn2aipnl52626 | CDKN2A interacting protein N-terminal like                   | 4.71 | 2.74 | 0.06 |
| A_51_P511480 | NM_028680 | Ift57 73916     | intraflagellar transport 57 homolog (Chlamydomonas)          | 4.74 | 2.74 | 0.06 |
| A_51_P287606 | NM_028484 | 1700037C173261  | RIKEN cDNA 1700037C18 gene                                   | 3.65 | 2.74 | 0.29 |
| A_51_P427516 | NM_019576 | Thsd1 56229     | thrombospondin, type I, domain 1                             | 5.23 | 2.73 | 0.00 |
| A_51_P476767 | NM_010924 | Nnmt 18113      | nicotinamide N-methyltransferase                             | 3.71 | 2.73 | 0.28 |
| A_51_P435830 | NM_029212 | Ccdc33 382077   | coiled-coil domain containing 33                             | 3.23 | 2.73 | 0.58 |
| A_51_P374533 | NM_146338 | Olfrc374 258335 | olfactory receptor 374                                       | 3.83 | 2.73 | 0.23 |
| A_52_P415440 | AK132208  | Rps12 20042     | ribosomal protein S12                                        | 3.78 | 2.73 | 0.25 |
| A_52_P382914 | NM_011639 | Trip6 22051     | thyroid hormone receptor interactor 6                        | 3.41 | 2.73 | 0.42 |
| A_51_P262699 | NA        | NA NA           | NA                                                           | 5.43 | 2.73 | 0.00 |
| A_51_P139651 | NM_008713 | Nos3 18127      | nitric oxide synthase 3, endothelial cell                    | 3.06 | 2.73 | 0.75 |
| A_51_P304170 | NM_023386 | Rtp4 67775      | receptor transporter protein 4                               | 2.96 | 2.72 | 0.91 |
| A_51_P483118 | NM_016660 | Hmga1 15361     | high mobility group AT-hook 1                                | 5.04 | 2.72 | 0.08 |
| A_52_P305041 | NM_027045 | Gcap14 72972    | granule cell antiserum positive 14                           | 3.36 | 2.72 | 0.46 |
| A_52_P201337 | NM_010900 | Nfatc2ip 18020  | nuclear factor of activated T-cells, cytoplasmic, calcineuri | 3.59 | 2.72 | 0.32 |
| A_51_P251256 | NM_009195 | Slc12a4 20498   | solute carrier family 12, member 4                           | 6.32 | 2.71 | 0.00 |
| A_51_P516625 | NM_008090 | Gata2 14461     | GATA binding protein 2                                       | 3.94 | 2.71 | 0.19 |
| A_52_P392674 | NM_019736 | Acot9 56360     | acyl-CoA thioesterase 9                                      | 6.89 | 2.71 | 0.00 |
| A_52_P413805 | AK028505  | Rad18 58186     | RAD18 homolog (S. cerevisiae)                                | 3.67 | 2.71 | 0.29 |
| A_51_P346938 | NM_029796 | Lrg1 76905      | leucine-rich alpha-2-glycoprotein 1                          | 4.62 | 2.71 | 0.05 |
| A_51_P116946 | NM_080467 | Atp6v0a4 140494 | ATPase, H+ transporting, lysosomal V0 subunit A4             | 3.85 | 2.71 | 0.22 |
| A_51_P184773 | NM_011715 | Wdr1 22388      | WD repeat domain 1                                           | 5.58 | 2.71 | 0.00 |
| A_52_P424037 | NM_019553 | Ddx21 56200     | DEAD (Asp-Glu-Ala-Asp) box polypeptide 21                    | 3.32 | 2.71 | 0.49 |
| A_51_P247249 | NM_009662 | Alox5 11689     | arachidonate 5-lipoxygenase                                  | 4.88 | 2.70 | 0.07 |
| A_52_P627816 | NM_019984 | Tgm1 21816      | transglutaminase 1, K polypeptide                            | 4.22 | 2.69 | 0.13 |
| A_52_P480301 | NM_029012 | Sppl3 74585     | signal peptide peptidase 3                                   | 2.91 | 2.69 | 0.99 |
| A_51_P274039 | NM_007761 | Crcp 12909      | calcitonin gene-related peptide-receptor component pro       | 3.26 | 2.69 | 0.53 |
| A_51_P118443 | AK051656  | 2310014HC76448  | RIKEN cDNA 2310014H01 gene                                   | 3.78 | 2.68 | 0.25 |
| A_52_P102773 | BC072628  | Hk1 15275       | hexokinase 1                                                 | 4.07 | 2.68 | 0.16 |

|               |           |           |        |                                                           |      |      |      |
|---------------|-----------|-----------|--------|-----------------------------------------------------------|------|------|------|
| A_51_P354804  | NM_080643 | Caskin2   | 140721 | CASK-interacting protein 2                                | 4.62 | 2.68 | 0.05 |
| A_51_P511482  | NM_028680 | lft57     | 73916  | intraflagellar transport 57 homolog (Chlamydomonas)       | 5.29 | 2.68 | 0.00 |
| A_51_P411297  | NM_016714 | Nup50     | 18141  | nucleoporin 50                                            | 3.45 | 2.68 | 0.40 |
| A_51_P276479  | NM_178098 | 4930486L2 | 214639 | RIKEN cDNA 4930486L24 gene                                | 3.88 | 2.67 | 0.20 |
| A_52_P516097  | NM_175529 | Leng9     | 243813 | leukocyte receptor cluster (LRC) member 9                 | 3.14 | 2.67 | 0.67 |
| A_52_P125993  | XM_484715 | Sft2d3    | 67158  | SFT2 domain containing 3                                  | 3.14 | 2.67 | 0.67 |
| A_51_P109449  | NM_008519 | Ltb4r1    | 16995  | leukotriene B4 receptor 1                                 | 4.90 | 2.67 | 0.07 |
| A_51_P430423  | NM_007398 | Ada       | 11486  | adenosine deaminase                                       | 3.63 | 2.66 | 0.31 |
| A_51_P493771  | AK163840  | 8030462N1 | 212163 | RIKEN cDNA 8030462N17 gene                                | 3.36 | 2.66 | 0.46 |
| A_51_P228846  | NM_015797 | Fbxo6     | 50762  | F-box protein 6                                           | 5.75 | 2.66 | 0.00 |
| A_52_P44      | BC040369  | Bcl2l2    | 12050  | BCL2-like 2                                               | 3.42 | 2.66 | 0.42 |
| A_52_P490770  | AK141740  | Zfp26     | 22688  | zinc finger protein 26                                    | 3.16 | 2.65 | 0.65 |
| A_51_P312327  | NM_022415 | Ptges     | 64292  | prostaglandin E synthase                                  | 4.03 | 2.65 | 0.16 |
| A_51_P248962  | XM_896388 | NA        | NA     | NA                                                        | 4.11 | 2.65 | 0.14 |
| A_51_P446012  | NM_172705 | Phf13     | 230936 | PHD finger protein 13                                     | 2.90 | 2.65 | 0.99 |
| A_51_P138952  | NM_028815 | Cep97     | 74201  | centrosomal protein 97                                    | 4.19 | 2.65 | 0.12 |
| A_52_P1115511 | AK031392  | 6030422H2 | 402765 | RIKEN cDNA 6030422H21 gene                                | 3.23 | 2.65 | 0.56 |
| A_51_P262701  | NM_019775 | Cpb2      | 56373  | carboxypeptidase B2 (plasma)                              | 6.26 | 2.65 | 0.00 |
| A_51_P149714  | NM_026835 | Ms4a6d    | 68774  | membrane-spanning 4-domains, subfamily A, member 6l       | 3.30 | 2.65 | 0.52 |
| A_51_P320377  | NM_001039 | Gtf2a2    | 235459 | general transcription factor II A, 2                      | 4.09 | 2.64 | 0.17 |
| A_52_P124352  | AK078888  | lfrd1     | 15982  | interferon-related developmental regulator 1              | 4.08 | 2.64 | 0.16 |
| A_52_P361664  | NM_016862 | Vti1a     | 53611  | vesicle transport through interaction with t-SNAREs hom   | 5.10 | 2.64 | 0.00 |
| A_51_P400581  | NM_023210 | Anp32e    | 66471  | acidic (leucine-rich) nuclear phosphoprotein 32 family, m | 3.87 | 2.64 | 0.22 |
| A_52_P590168  | NM_009375 | Tg        | 21819  | thyroglobulin                                             | 3.23 | 2.63 | 0.58 |
| A_51_P213766  | NM_013785 | lp6k1     | 27399  | inositol hexaphosphate kinase 1                           | 4.33 | 2.63 | 0.11 |
| A_51_P256827  | NM_013650 | S100a8    | 20201  | S100 calcium binding protein A8 (calgranulin A)           | 3.82 | 2.63 | 0.24 |
| A_51_P395011  | NM_007523 | Bak1      | 12018  | BCL2-antagonist/killer 1                                  | 5.38 | 2.63 | 0.00 |
| A_51_P156857  | NM_134133 | 2010002N0 | 106878 | RIKEN cDNA 2010002N04 gene                                | 3.10 | 2.62 | 0.70 |
| A_52_P214966  | NM_177730 | Impad1    | 242291 | inositol monophosphatase domain containing 1              | 3.34 | 2.62 | 0.48 |
| A_51_P365189  | NM_133990 | Il13ra1   | 16164  | interleukin 13 receptor, alpha 1                          | 3.48 | 2.62 | 0.37 |
| A_51_P520760  | BE570772  | Metap2    | 56307  | methionine aminopeptidase 2                               | 3.79 | 2.62 | 0.23 |
| A_51_P491350  | NM_009932 | Col4a2    | 12827  | collagen, type IV, alpha 2                                | 4.33 | 2.62 | 0.11 |
| A_51_P162794  | NM_010370 | Gzma      | 14938  | granzyme A                                                | 4.17 | 2.62 | 0.12 |
| A_51_P439876  | AK020498  | Map4k4    | 26921  | mitogen-activated protein kinase kinase kinase kinase 4   | 3.45 | 2.61 | 0.40 |

|              |           |            |        |                                                                       |      |      |      |
|--------------|-----------|------------|--------|-----------------------------------------------------------------------|------|------|------|
| A_52_P315280 | NM_010918 | Nktr       | 18087  | natural killer tumor recognition sequence                             | 3.67 | 2.61 | 0.29 |
| A_52_P248483 | NM_001044 | Zfx        | 22764  | zinc finger protein X-linked                                          | 3.49 | 2.61 | 0.38 |
| A_51_P241861 | NM_016921 | Tcirg1     | 27060  | T-cell, immune regulator 1, ATPase, H <sup>+</sup> transporting, lyso | 3.05 | 2.61 | 0.76 |
| A_51_P517695 | NM_008530 | Ly6f       | 17071  | lymphocyte antigen 6 complex, locus F                                 | 4.98 | 2.61 | 0.08 |
| A_51_P208330 | NM_018883 | Camkk1     | 55984  | calcium/calmodulin-dependent protein kinase kinase 1, $\alpha$        | 5.70 | 2.61 | 0.00 |
| A_51_P333253 | NM_178440 | Myo1g      | 246177 | myosin IG                                                             | 4.43 | 2.61 | 0.08 |
| A_51_P147878 | NM_010432 | Hipk1      | 15257  | homeodomain interacting protein kinase 1                              | 3.87 | 2.61 | 0.20 |
| A_52_P73385  | AK086933  | Fas        | 14102  | Fas (TNF receptor superfamily member 6)                               | 3.47 | 2.60 | 0.39 |
| A_51_P394690 | NM_175036 | Leprot     | 230514 | leptin receptor overlapping transcript                                | 2.96 | 2.60 | 0.92 |
| A_51_P150195 | NM_028860 | Mtmr3      | 74302  | myotubularin related protein 3                                        | 3.64 | 2.60 | 0.31 |
| A_51_P382152 | NM_011171 | Procr      | 19124  | protein C receptor, endothelial                                       | 3.38 | 2.60 | 0.45 |
| A_52_P193533 | AK159732  | Slc25a30   | 67554  | solute carrier family 25, member 30                                   | 2.94 | 2.59 | 0.93 |
| A_52_P141338 | NM_022816 | Acot10     | 64833  | acyl-CoA thioesterase 10                                              | 6.26 | 2.59 | 0.00 |
| A_51_P480209 | NM_007889 | Dvl3       | 13544  | dishevelled 3, dsh homolog (Drosophila)                               | 3.47 | 2.59 | 0.39 |
| A_52_P665520 | NM_028680 | lft57      | 73916  | intraflagellar transport 57 homolog (Chlamydomonas)                   | 5.09 | 2.59 | 0.00 |
| A_52_P344354 | AK154692  | Rprd2      | 75137  | regulation of nuclear pre-mRNA domain containing 2                    | 3.12 | 2.58 | 0.70 |
| A_52_P276666 | NM_009881 | Cdyl       | 12593  | chromodomain protein, Y chromosome-like                               | 2.94 | 2.57 | 0.95 |
| A_51_P310040 | NM_144904 | Rod1       | 230257 | ROD1 regulator of differentiation 1 (S. pombe)                        | 3.87 | 2.57 | 0.20 |
| A_52_P218440 | NM_178098 | 4930486L2  | 214639 | RIKEN cDNA 4930486L24 gene                                            | 4.18 | 2.57 | 0.12 |
| A_52_P154710 | AK170547  | Sesn2      | 230784 | sestrin 2                                                             | 3.21 | 2.56 | 0.59 |
| A_52_P293232 | NM_030705 | Mesdc1     | 80889  | mesoderm development candidate 1                                      | 3.79 | 2.56 | 0.23 |
| A_52_P253015 | AK163954  | Erap1      | 80898  | endoplasmic reticulum aminopeptidase 1                                | 4.34 | 2.56 | 0.11 |
| A_52_P465521 | NA        | NA         | NA     | NA                                                                    | 4.06 | 2.56 | 0.16 |
| A_51_P440807 | NM_007760 | Crat       | 12908  | carnitine acetyltransferase                                           | 2.97 | 2.55 | 0.89 |
| A_52_P623682 | NA        | NA         | NA     | NA                                                                    | 4.41 | 2.55 | 0.08 |
| A_51_P483473 | NM_011375 | St3gal5    | 20454  | ST3 beta-galactoside alpha-2,3-sialyltransferase 5                    | 3.59 | 2.55 | 0.32 |
| A_52_P561293 | AK034782  | 9430037G07 | 320692 | RIKEN cDNA 9430037G07 gene                                            | 3.07 | 2.55 | 0.74 |
| A_52_P359819 | NM_198190 | Ntf5       | 78405  | neurotrophin 5                                                        | 3.35 | 2.55 | 0.47 |
| A_51_P369252 | BC066148  | 4632434I1  | 74041  | RIKEN cDNA 4632434I11 gene                                            | 3.54 | 2.55 | 0.34 |
| A_52_P488361 | NM_028839 | Tmem110    | 69179  | transmembrane protein 110                                             | 5.15 | 2.55 | 0.00 |
| A_51_P329928 | NM_013750 | Phlda3     | 27280  | pleckstrin homology-like domain, family A, member 3                   | 3.24 | 2.55 | 0.56 |
| A_52_P283087 | AK015010  | Vti1a      | 53611  | vesicle transport through interaction with t-SNAREs hom               | 4.82 | 2.55 | 0.06 |
| A_52_P578790 | NM_013739 | Dok3       | 27261  | docking protein 3                                                     | 6.51 | 2.54 | 0.00 |
| A_52_P188261 | NM_001025 | Camk2d     | 108058 | calcium/calmodulin-dependent protein kinase II, delta                 | 5.37 | 2.54 | 0.00 |

|              |           |                 |        |                                                             |      |      |      |
|--------------|-----------|-----------------|--------|-------------------------------------------------------------|------|------|------|
| A_51_P383140 | NM_009289 | Slk             | 20874  | STE20-like kinase (yeast)                                   | 3.83 | 2.54 | 0.23 |
| A_51_P195935 | BC067054  | Rprd2           | 75137  | regulation of nuclear pre-mRNA domain containing 2          | 3.35 | 2.54 | 0.46 |
| A_51_P469817 | AK163070  | A630052E0320726 |        | RIKEN cDNA A630052E07 gene                                  | 3.20 | 2.54 | 0.60 |
| A_51_P466858 | NM_001039 | Asxl1           | 228790 | additional sex combs like 1 (Drosophila)                    | 3.70 | 2.54 | 0.27 |
| A_52_P626796 | XM_001006 | NA              | NA     | NA                                                          | 3.95 | 2.54 | 0.19 |
| A_51_P222936 | AK080318  | Fmn12           | 71409  | formin-like 2                                               | 2.90 | 2.53 | 1.02 |
| A_52_P348287 | NM_198104 | Tcte3           | 21647  | t-complex-associated testis expressed 3                     | 3.30 | 2.53 | 0.52 |
| A_51_P453351 | NM_172266 | Lpgat1          | 226856 | lysophosphatidylglycerol acyltransferase 1                  | 4.03 | 2.53 | 0.16 |
| A_51_P425696 | NM_029810 | Nt5c2           | 76952  | 5'-nucleotidase, cytosolic II                               | 5.46 | 2.53 | 0.00 |
| A_52_P85875  | NM_026998 | Snx6            | 72183  | sorting nexin 6                                             | 4.38 | 2.53 | 0.12 |
| A_51_P484289 | NM_178798 | Slc7a6          | 330836 | solute carrier family 7 (cationic amino acid transporter, y | 3.60 | 2.53 | 0.32 |
| A_52_P616392 | NM_183426 | Sbno2           | 216161 | strawberry notch homolog 2 (Drosophila)                     | 3.07 | 2.53 | 0.74 |
| A_52_P465454 | AK162362  | D10Ertd64:52717 |        | DNA segment, Chr 10, ERATO Doi 641, expressed               | 3.73 | 2.53 | 0.27 |
| A_52_P564544 | NM_024406 | Fabp4           | 11770  | fatty acid binding protein 4, adipocyte                     | 3.41 | 2.52 | 0.43 |
| A_52_P128906 | AK006810  | Zfp787          | 67109  | zinc finger protein 787                                     | 3.97 | 2.52 | 0.17 |
| A_52_P384331 | NM_030228 | Gas2l1          | 78926  | growth arrest-specific 2 like 1                             | 4.22 | 2.52 | 0.13 |
| A_51_P448325 | NM_027102 | Esam            | 69524  | endothelial cell-specific adhesion molecule                 | 3.53 | 2.51 | 0.34 |
| A_51_P300277 | NM_009898 | Coro1a          | 12721  | coronin, actin binding protein 1A                           | 3.75 | 2.51 | 0.26 |
| A_51_P194415 | NM_023908 | Slco3a1         | 108116 | solute carrier organic anion transporter family, member :   | 3.61 | 2.51 | 0.31 |
| A_52_P443705 | NM_026531 | Aen             | 68048  | apoptosis enhancing nuclease                                | 4.20 | 2.51 | 0.13 |
| A_51_P288549 | BC016255  | Jmjd7           | 433466 | jumonji domain containing 7                                 | 4.53 | 2.51 | 0.09 |
| A_51_P163261 | NA        | NA              | NA     | NA                                                          | 4.73 | 2.51 | 0.06 |
| A_51_P458866 | NM_172647 | F11r            | 16456  | F11 receptor                                                | 3.37 | 2.51 | 0.45 |
| A_52_P380418 | M32070    | Rarg            | 19411  | retinoic acid receptor, gamma                               | 6.04 | 2.51 | 0.00 |
| A_51_P462299 | NM_181732 | Aida            | 108909 | axin interactor, dorsalization associated                   | 3.08 | 2.50 | 0.72 |
| A_51_P419246 | AK158034  | 5830416P1381232 |        | RIKEN cDNA 5830416P10 gene                                  | 5.26 | 2.50 | 0.00 |
| A_51_P228658 | NM_023627 | lsyna1          | 71780  | myo-inositol 1-phosphate synthase A1                        | 3.19 | 2.50 | 0.62 |
| A_52_P603668 | NM_025446 | Aig1            | 66253  | androgen-induced 1                                          | 5.52 | 2.50 | 0.00 |
| A_52_P516296 | NM_145226 | Oas3            | 246727 | 2'-5' oligoadenylate synthetase 3                           | 2.95 | 2.50 | 0.92 |
| A_52_P16877  | NM_172051 | Tmcc3           | 319880 | transmembrane and coiled coil domains 3                     | 3.62 | 2.50 | 0.31 |
| A_52_P100293 | AK005549  | 493052611:75135 |        | RIKEN cDNA 4930526115 gene                                  | 3.66 | 2.49 | 0.28 |
| A_51_P396854 | NM_019502 | Fxc1            | 14356  | fractured callus expressed transcript 1                     | 3.35 | 2.49 | 0.47 |
| A_51_P203675 | NM_021407 | Trem3           | 58218  | triggering receptor expressed on myeloid cells 3            | 3.67 | 2.49 | 0.29 |
| A_51_P138598 | NM_028839 | Tmem110         | 69179  | transmembrane protein 110                                   | 3.79 | 2.49 | 0.25 |

|              |           |            |        |                                                                   |      |      |      |
|--------------|-----------|------------|--------|-------------------------------------------------------------------|------|------|------|
| A_51_P456753 | NM_009747 | Bdkrb2     | 12062  | bradykinin receptor, beta 2                                       | 5.04 | 2.49 | 0.08 |
| A_52_P638459 | BC033508  | Ccl5       | 20304  | chemokine (C-C motif) ligand 5                                    | 3.54 | 2.48 | 0.34 |
| A_51_P494597 | AK137465  | BC013712   | 230787 | cDNA sequence BC013712                                            | 3.12 | 2.48 | 0.70 |
| A_51_P381150 | NM_199299 | Phf15      | 76901  | PHD finger protein 15                                             | 3.62 | 2.48 | 0.31 |
| A_52_P87395  | NA        | NA         | NA     | NA                                                                | 3.70 | 2.48 | 0.27 |
| A_51_P492595 | NM_172518 | Fbxo42     | 213499 | F-box protein 42                                                  | 3.29 | 2.48 | 0.52 |
| A_52_P507214 | NM_013599 | Mmp9       | 17395  | matrix metalloproteinase 9                                        | 4.05 | 2.48 | 0.16 |
| A_52_P228005 | AK172246  | Ipmk       | 69718  | inositol polyphosphate multikinase                                | 3.82 | 2.48 | 0.24 |
| A_51_P444015 | NA        | NA         | NA     | NA                                                                | 3.48 | 2.47 | 0.37 |
| A_52_P909274 | NM_011173 | Pros1      | 19128  | protein S (alpha)                                                 | 4.39 | 2.47 | 0.12 |
| A_52_P231041 | NM_178119 | Agap1      | 347722 | ArfGAP with GTPase domain, ankyrin repeat and PH dom              | 3.21 | 2.47 | 0.59 |
| A_52_P337899 | NM_010220 | Fkbp5      | 14229  | FK506 binding protein 5                                           | 3.05 | 2.47 | 0.76 |
| A_51_P440978 | AK047822  | Mllt4      | 17356  | myeloid/lymphoid or mixed-lineage leukemia (trithorax l           | 3.53 | 2.46 | 0.34 |
| A_52_P932984 | NA        | NA         | NA     | NA                                                                | 4.05 | 2.46 | 0.16 |
| A_51_P381157 | NM_027420 | 2610034B1  | 70420  | RIKEN cDNA 2610034B18 gene                                        | 5.54 | 2.46 | 0.00 |
| A_51_P213641 | NM_001035 | Ap2b1      | 71770  | adaptor-related protein complex 2, beta 1 subunit                 | 4.69 | 2.46 | 0.05 |
| A_51_P405956 | NA        | NA         | NA     | NA                                                                | 3.49 | 2.46 | 0.38 |
| A_52_P490272 | NM_022979 | Nup98      | 269966 | nucleoporin 98                                                    | 3.76 | 2.46 | 0.25 |
| A_52_P24593  | NM_029492 | Zdhhc20    | 75965  | zinc finger, DHHC domain containing 20                            | 3.65 | 2.45 | 0.30 |
| A_51_P192800 | NM_008175 | Grn        | 14824  | granulin                                                          | 5.44 | 2.45 | 0.00 |
| A_51_P225276 | NM_024181 | Dnajc10    | 66861  | Dnaj (Hsp40) homolog, subfamily C, member 10                      | 3.39 | 2.45 | 0.44 |
| A_51_P297346 | NM_029153 | Scamp1     | 107767 | secretory carrier membrane protein 1                              | 3.68 | 2.45 | 0.29 |
| A_51_P512364 | NM_139149 | Fus        | 233908 | fusion, derived from t(12;16) malignant liposarcoma (hur          | 3.44 | 2.45 | 0.40 |
| A_51_P476660 | XM_890447 | Mllt4      | 17356  | myeloid/lymphoid or mixed-lineage leukemia (trithorax l           | 4.61 | 2.45 | 0.05 |
| A_51_P407351 | NM_013825 | Ly75       | 17076  | lymphocyte antigen 75                                             | 3.83 | 2.44 | 0.23 |
| A_52_P41175  | CF540686  | Med13l     | 76199  | mediator complex subunit 13-like                                  | 3.20 | 2.44 | 0.60 |
| A_51_P231597 | NM_172987 | Nkain3     | 269513 | Na <sup>+</sup> /K <sup>+</sup> transporting ATPase interacting 3 | 3.89 | 2.44 | 0.21 |
| A_51_P304437 | NM_173019 | Pfkfb4     | 270198 | 6-phosphofructo-2-kinase/fructose-2,6-bisphosphatase 4            | 3.73 | 2.43 | 0.26 |
| A_52_P467718 | NM_029505 | Ap3m2      | 64933  | adaptor-related protein complex 3, mu 2 subunit                   | 4.44 | 2.43 | 0.08 |
| A_52_P435154 | NM_172648 | Ifi205     | 226695 | interferon activated gene 205                                     | 3.14 | 2.43 | 0.67 |
| A_52_P479269 | NM_011519 | Sdc1       | 20969  | syndecan 1                                                        | 3.09 | 2.43 | 0.71 |
| A_52_P489385 | XM_885832 | NA         | NA     | NA                                                                | 4.30 | 2.43 | 0.11 |
| A_52_P301312 | AK084007  | D130076A03 | 320592 | RIKEN cDNA D130076A03 gene                                        | 3.43 | 2.43 | 0.40 |
| A_51_P124315 | NM_177649 | NA         | NA     | NA                                                                | 2.89 | 2.43 | 1.02 |

|              |           |           |        |                                                             |      |      |      |
|--------------|-----------|-----------|--------|-------------------------------------------------------------|------|------|------|
| A_52_P311148 | AK012141  | 2410002O2 | 66975  | RIKEN cDNA 2410002O22 gene                                  | 3.64 | 2.43 | 0.31 |
| A_51_P479808 | NM_027418 | Mapk6     | 50772  | mitogen-activated protein kinase 6                          | 3.01 | 2.42 | 0.82 |
| A_51_P511315 | NM_011193 | Pstpip1   | 19200  | proline-serine-threonine phosphatase-interacting protein    | 5.59 | 2.42 | 0.00 |
| A_51_P459340 | NM_025755 | Pacrgl    | 66768  | PARK2 co-regulated-like                                     | 4.99 | 2.42 | 0.08 |
| A_52_P227746 | XR_003516 | NA        | NA     | NA                                                          | 4.64 | 2.42 | 0.05 |
| A_52_P492176 | NM_022023 | Gmfb      | 63985  | glia maturation factor, beta                                | 4.19 | 2.42 | 0.12 |
| A_52_P88910  | AK019498  | NA        | NA     | NA                                                          | 3.55 | 2.42 | 0.34 |
| A_51_P115829 | NM_025548 | Tbcb      | 66411  | tubulin folding cofactor B                                  | 6.25 | 2.42 | 0.00 |
| A_52_P683306 | NM_146084 | Fam13b    | 225358 | family with sequence similarity 13, member B                | 3.11 | 2.42 | 0.70 |
| A_51_P268934 | NM_153142 | Slc35e4   | 103710 | solute carrier family 35, member E4                         | 4.86 | 2.42 | 0.06 |
| A_52_P536731 | NM_001004 | Asap2     | 211914 | ArfGAP with SH3 domain, ankyrin repeat and PH domain        | 2.97 | 2.42 | 0.89 |
| A_51_P333071 | NM_025514 | D10Ertd64 | 52717  | DNA segment, Chr 10, ERATO Doi 641, expressed               | 3.28 | 2.41 | 0.53 |
| A_52_P623337 | NM_010880 | Ncl       | 17975  | nucleolin                                                   | 3.01 | 2.41 | 0.81 |
| A_51_P511102 | NM_030249 | Cttnbp2nl | 80281  | CTTNBP2 N-terminal like                                     | 3.77 | 2.41 | 0.25 |
| A_52_P502828 | NM_001008 | Pde2a     | 207728 | phosphodiesterase 2A, cGMP-stimulated                       | 3.37 | 2.41 | 0.45 |
| A_51_P281134 | AB019028  | Med14     | 26896  | mediator complex subunit 14                                 | 3.99 | 2.41 | 0.18 |
| A_52_P527917 | NM_028247 | Slc16a10  | 72472  | solute carrier family 16 (monocarboxylic acid transporter   | 3.12 | 2.41 | 0.70 |
| A_51_P311611 | NM_010045 | Darc      | 13349  | Duffy blood group, chemokine receptor                       | 2.92 | 2.41 | 0.98 |
| A_51_P167857 | NM_145221 | App1      | 72993  | adaptor protein, phosphotyrosine interaction, PH domain     | 4.96 | 2.41 | 0.07 |
| A_52_P133594 | NM_009778 | C3        | 12266  | complement component 3                                      | 4.99 | 2.41 | 0.08 |
| A_51_P431433 | NM_031997 | Tmem2     | 83921  | transmembrane protein 2                                     | 3.27 | 2.41 | 0.53 |
| A_51_P262208 | NM_008404 | Itgb2     | 16414  | integrin beta 2                                             | 3.81 | 2.41 | 0.24 |
| A_52_P473172 | NA        | NA        | NA     | NA                                                          | 4.71 | 2.40 | 0.06 |
| A_52_P120958 | NM_011135 | Cnot7     | 18983  | CCR4-NOT transcription complex, subunit 7                   | 3.23 | 2.40 | 0.58 |
| A_52_P592466 | NM_023275 | Rhoj      | 80837  | ras homolog gene family, member J                           | 3.77 | 2.39 | 0.25 |
| A_51_P469449 | NM_001040 | Ung       | 22256  | uracil DNA glycosylase                                      | 3.26 | 2.39 | 0.53 |
| A_52_P496142 | NM_009932 | Col4a2    | 12827  | collagen, type IV, alpha 2                                  | 4.39 | 2.39 | 0.12 |
| A_51_P475948 | AK048129  | Elmo3     | 234683 | engulfment and cell motility 3, ced-12 homolog (C. elegans) | 4.08 | 2.38 | 0.16 |
| A_51_P187842 | NM_025829 | Eif4e3    | 66892  | eukaryotic translation initiation factor 4E member 3        | 3.20 | 2.38 | 0.60 |
| A_52_P601383 | NM_011090 | Lilra6    | 18726  | leukocyte immunoglobulin-like receptor, subfamily A (with   | 3.44 | 2.38 | 0.40 |
| A_52_P39533  | NM_178729 | Fbxl5     | 242960 | F-box and leucine-rich repeat protein 5                     | 3.38 | 2.38 | 0.45 |
| A_51_P322465 | NM_178601 | Imp4      | 27993  | IMP4, U3 small nucleolar ribonucleoprotein, homolog (yeast) | 5.05 | 2.38 | 0.08 |
| A_52_P557923 | NM_015797 | Fbxo6     | 50762  | F-box protein 6                                             | 5.15 | 2.38 | 0.00 |
| A_51_P249259 | BC071254  | NA        | NA     | NA                                                          | 3.56 | 2.38 | 0.35 |

|              |           |           |        |                                                              |      |      |      |
|--------------|-----------|-----------|--------|--------------------------------------------------------------|------|------|------|
| A_52_P251233 | XM_920748 | NA        | NA     | NA                                                           | 3.02 | 2.37 | 0.81 |
| A_52_P118638 | NM_177103 | Senp5     | 320213 | SUMO/sentrin specific peptidase 5                            | 3.51 | 2.37 | 0.36 |
| A_52_P638439 | NM_001037 | NA        | NA     | NA                                                           | 4.54 | 2.37 | 0.09 |
| A_52_P548913 | NM_009817 | Cast      | 12380  | calpastatin                                                  | 4.54 | 2.37 | 0.09 |
| A_51_P325223 | NM_011698 | Lin7b     | 22342  | lin-7 homolog B (C. elegans)                                 | 6.43 | 2.36 | 0.00 |
| A_51_P482633 | NM_019924 | Rps6ka4   | 56613  | ribosomal protein S6 kinase, polypeptide 4                   | 5.11 | 2.36 | 0.00 |
| A_52_P225377 | AK014446  | Pvr       | 52118  | poliovirus receptor                                          | 7.02 | 2.36 | 0.00 |
| A_51_P488383 | XM_001005 | NA        | NA     | NA                                                           | 3.84 | 2.36 | 0.23 |
| A_52_P43549  | NM_007646 | Cd38      | 12494  | CD38 antigen                                                 | 4.00 | 2.36 | 0.18 |
| A_51_P136233 | NM_021284 | Kras      | 16653  | v-Ki-ras2 Kirsten rat sarcoma viral oncogene homolog         | 4.29 | 2.36 | 0.10 |
| A_51_P281013 | BC033455  | 0610007L0 | 71667  | RIKEN cDNA 0610007L01 gene                                   | 5.53 | 2.36 | 0.00 |
| A_51_P297105 | NM_011671 | Ucp2      | 22228  | uncoupling protein 2 (mitochondrial, proton carrier)         | 4.24 | 2.36 | 0.13 |
| A_52_P572808 | NM_172715 | Agpat9    | 231510 | 1-acylglycerol-3-phosphate O-acyltransferase 9               | 5.04 | 2.36 | 0.08 |
| A_52_P320032 | NM_139149 | Fus       | 233908 | fusion, derived from t(12;16) malignant liposarcoma (hur     | 3.93 | 2.36 | 0.19 |
| A_51_P446022 | AK052528  | D430042O  | 233865 | RIKEN cDNA D430042O09 gene                                   | 3.90 | 2.36 | 0.21 |
| A_51_P225761 | AK031537  | Zcchc6    | 214290 | zinc finger, CCHC domain containing 6                        | 3.26 | 2.35 | 0.53 |
| A_51_P496804 | NM_025748 | Adat2     | 66757  | adenosine deaminase, tRNA-specific 2, TAD2 homolog (S.       | 3.78 | 2.35 | 0.25 |
| A_51_P313157 | XM_979233 | NA        | NA     | NA                                                           | 5.84 | 2.35 | 0.00 |
| A_52_P134228 | NM_028185 | Lsm11     | 72290  | U7 snRNP-specific Sm-like protein LSM11                      | 4.71 | 2.35 | 0.06 |
| A_52_P15536  | NM_133349 | Zfand2a   | 100494 | zinc finger, AN1-type domain 2A                              | 4.69 | 2.35 | 0.05 |
| A_51_P516861 | AK122234  | Rapgef5   | 217944 | Rap guanine nucleotide exchange factor (GEF) 5               | 3.72 | 2.35 | 0.27 |
| A_51_P210395 | NM_053108 | Glrx      | 93692  | glutaredoxin                                                 | 3.01 | 2.35 | 0.82 |
| A_52_P670970 | AK122466  | Usp31     | 76179  | ubiquitin specific peptidase 31                              | 3.65 | 2.35 | 0.30 |
| A_52_P299746 | NM_133781 | Cab39     | 12283  | calcium binding protein 39                                   | 3.51 | 2.35 | 0.36 |
| A_51_P405476 | NM_010185 | Fcer1g    | 14127  | Fc receptor, IgE, high affinity I, gamma polypeptide         | 3.31 | 2.35 | 0.50 |
| A_52_P87964  | NM_183423 | Pla2g12a  | 66350  | phospholipase A2, group X1IA                                 | 3.96 | 2.34 | 0.17 |
| A_52_P423424 | NM_015774 | Ero1l     | 50527  | ERO1-like (S. cerevisiae)                                    | 5.10 | 2.34 | 0.00 |
| A_52_P343641 | NM_009172 | Siah1a    | 20437  | seven in absentia 1A                                         | 3.36 | 2.34 | 0.46 |
| A_52_P111031 | NM_001013 | Pcdh17    | 219228 | protocadherin 17                                             | 3.90 | 2.34 | 0.21 |
| A_51_P259214 | NM_139143 | Slc39a6   | 106957 | solute carrier family 39 (metal ion transporter), member     | 3.43 | 2.34 | 0.40 |
| A_52_P329851 | NM_028836 | Ctbs      | 74245  | chitinase, di-N-acetyl-                                      | 4.89 | 2.34 | 0.07 |
| A_52_P662025 | NM_144834 | Serpina10 | 217847 | serine (or cysteine) peptidase inhibitor, clade A (alpha-1 i | 3.19 | 2.34 | 0.60 |
| A_52_P601980 | NM_152895 | Kdm5b     | 75605  | lysine (K)-specific demethylase 5B                           | 3.10 | 2.34 | 0.70 |
| A_51_P265406 | NM_053194 | Ric8      | 101489 | resistance to inhibitors of cholinesterase 8 homolog (C. e   | 4.60 | 2.34 | 0.10 |

|              |           |           |        |                                                              |      |      |      |
|--------------|-----------|-----------|--------|--------------------------------------------------------------|------|------|------|
| A_52_P625461 | AK088316  | Ipo11     | 76582  | importin 11                                                  | 4.39 | 2.34 | 0.12 |
| A_52_P229770 | XM_133543 | Akap13    | 75547  | A kinase (PRKA) anchor protein 13                            | 3.20 | 2.34 | 0.60 |
| A_52_P641922 | NM_172501 | Nhlrc3    | 212114 | NHL repeat containing 3                                      | 5.27 | 2.34 | 0.00 |
| A_52_P309012 | AK033502  | Chmp4c    | 66371  | chromatin modifying protein 4C                               | 3.26 | 2.34 | 0.53 |
| A_52_P583777 | NA        | NA        | NA     | NA                                                           | 3.87 | 2.34 | 0.22 |
| A_52_P588096 | NM_175515 | Intu      | 380614 | inturned planar cell polarity effector homolog (Drosophil    | 4.02 | 2.33 | 0.18 |
| A_51_P264835 | NM_010148 | Epn2      | 13855  | epsin 2                                                      | 4.46 | 2.33 | 0.08 |
| A_51_P186161 | NM_001033 | Rnf149    | 67702  | ring finger protein 149                                      | 3.82 | 2.33 | 0.24 |
| A_51_P272563 | NM_172722 | Naa25     | 231713 | N(alpha)-acetyltransferase 25, NatB auxiliary subunit        | 2.99 | 2.33 | 0.85 |
| A_51_P382369 | NM_175751 | Zfp608    | 269023 | zinc finger protein 608                                      | 3.10 | 2.33 | 0.70 |
| A_52_P167278 | NM_172308 | Mthfd1l   | 270685 | methylenetetrahydrofolate dehydrogenase (NADP+ depe          | 3.24 | 2.33 | 0.56 |
| A_52_P99622  | NM_145630 | Pdk3      | 236900 | pyruvate dehydrogenase kinase, isoenzyme 3                   | 6.12 | 2.32 | 0.00 |
| A_52_P193440 | XM_976118 | NA        | NA     | NA                                                           | 3.33 | 2.32 | 0.49 |
| A_52_P532880 | NA        | NA        | NA     | NA                                                           | 7.24 | 2.32 | 0.00 |
| A_52_P23413  | NM_172911 | D8Ertd82e | 244418 | DNA segment, Chr 8, ERATO Doi 82, expressed                  | 3.42 | 2.32 | 0.40 |
| A_51_P258435 | NM_026917 | Zdhhc3    | 69035  | zinc finger, DHHC domain containing 3                        | 3.25 | 2.32 | 0.55 |
| A_52_P350687 | NM_177545 | Vangl1    | 229658 | vang-like 1 (van gogh, Drosophila)                           | 7.57 | 2.32 | 0.00 |
| A_51_P225592 | NM_001001 | Tpm4      | 326618 | tropomyosin 4                                                | 3.81 | 2.32 | 0.24 |
| A_51_P411296 | NM_016714 | Nup50     | 18141  | nucleoporin 50                                               | 3.34 | 2.32 | 0.48 |
| A_52_P467449 | NM_007440 | Alox12    | 11684  | arachidonate 12-lipoxygenase                                 | 4.61 | 2.32 | 0.05 |
| A_52_P624447 | NM_009388 | Tkt       | 21881  | transketolase                                                | 3.27 | 2.32 | 0.53 |
| A_52_P485417 | NM_008252 | Hmgb2     | 97165  | high mobility group box 2                                    | 4.73 | 2.32 | 0.06 |
| A_51_P310254 | NM_133750 | Fam118a   | 73225  | family with sequence similarity 118, member A                | 3.90 | 2.31 | 0.21 |
| A_52_P112017 | NM_009775 | Tspo      | 12257  | translocator protein                                         | 5.31 | 2.31 | 0.00 |
| A_52_P593200 | NM_029688 | Srxn1     | 76650  | sulfiredoxin 1 homolog (S. cerevisiae)                       | 3.49 | 2.31 | 0.38 |
| A_51_P227929 | NM_199032 | Cep135    | 381644 | centrosomal protein 135                                      | 3.66 | 2.31 | 0.29 |
| A_51_P146753 | NM_007781 | Csf2rb2   | 12984  | colony stimulating factor 2 receptor, beta 2, low-affinity ( | 4.24 | 2.30 | 0.13 |
| A_52_P149590 | NM_144848 | Eppk1     | 223650 | epiplakin 1                                                  | 3.67 | 2.30 | 0.29 |
| A_51_P163834 | NM_019717 | Atl2      | 56298  | atlastin GTPase 2                                            | 5.66 | 2.30 | 0.00 |
| A_51_P521084 | NM_025626 | Fam107b   | 66540  | family with sequence similarity 107, member B                | 3.26 | 2.30 | 0.53 |
| A_51_P490997 | M89786    | Gas2l1    | 78926  | growth arrest-specific 2 like 1                              | 3.44 | 2.30 | 0.40 |
| A_52_P649296 | NM_010937 | Nras      | 18176  | neuroblastoma ras oncogene                                   | 6.15 | 2.30 | 0.00 |
| A_52_P506407 | NM_011089 | Pira2     | 18725  | paired-Ig-like receptor A2                                   | 4.10 | 2.30 | 0.17 |
| A_52_P498846 | AK009963  | NA        | NA     | NA                                                           | 3.89 | 2.29 | 0.21 |



|              |           |                 |        |                                                            |      |      |      |
|--------------|-----------|-----------------|--------|------------------------------------------------------------|------|------|------|
| A_51_P377826 | AF224494  | Zfand2a         | 100494 | zinc finger, AN1-type domain 2A                            | 3.90 | 2.29 | 0.21 |
| A_52_P467389 | NM_023044 | Slc15a3         | 65221  | solute carrier family 15, member 3                         | 3.04 | 2.29 | 0.79 |
| A_52_P76034  | NM_173867 | Rcc2            | 108911 | regulator of chromosome condensation 2                     | 3.56 | 2.29 | 0.35 |
| A_51_P277270 | NM_011252 | Rbmx            | 19655  | RNA binding motif protein, X chromosome                    | 2.94 | 2.29 | 0.93 |
| A_51_P186531 | NM_025289 | Tbreg1          | 21376  | transforming growth factor beta regulated gene 1           | 2.90 | 2.29 | 0.99 |
| A_52_P84315  | BC034239  | Chd7            | 320790 | chromodomain helicase DNA binding protein 7                | 3.33 | 2.29 | 0.49 |
| A_52_P174525 | BC043337  | Epb4.1          | 269587 | erythrocyte protein band 4.1                               | 3.16 | 2.29 | 0.65 |
| A_52_P513177 | NM_001029 | Sla             | 20491  | src-like adaptor                                           | 3.68 | 2.29 | 0.29 |
| A_52_P415116 | NM_021406 | Trem1           | 58217  | triggering receptor expressed on myeloid cells 1           | 3.99 | 2.29 | 0.18 |
| A_52_P660142 | XM_484715 | Sft2d3          | 67158  | SFT2 domain containing 3                                   | 3.51 | 2.29 | 0.36 |
| A_52_P302977 | NM_001015 | Taf9            | 108143 | TAF9 RNA polymerase II, TATA box binding protein (TBP)-    | 4.00 | 2.29 | 0.18 |
| A_52_P27225  | NM_201389 | Plec            | 18810  | plectin                                                    | 3.30 | 2.28 | 0.52 |
| A_52_P440508 | AK041801  | NA              | NA     | NA                                                         | 3.74 | 2.28 | 0.26 |
| A_51_P137018 | XM_001002 | NA              | NA     | NA                                                         | 3.61 | 2.28 | 0.31 |
| A_52_P481493 | NM_010220 | Fkbp5           | 14229  | FK506 binding protein 5                                    | 3.15 | 2.28 | 0.65 |
| A_51_P408116 | AK081783  | Il1f9           | 215257 | interleukin 1 family, member 9                             | 2.92 | 2.28 | 0.96 |
| A_52_P268250 | NM_146012 | Ctdsp2          | 52468  | CTD (carboxy-terminal domain, RNA polymerase II, polyp     | 3.50 | 2.28 | 0.36 |
| A_52_P37947  | NM_176976 | 5830418K0319675 | 319675 | RIKEN cDNA 5830418K08 gene                                 | 3.57 | 2.28 | 0.33 |
| A_52_P686344 | NM_001014 | Ttll4           | 67534  | tubulin tyrosine ligase-like family, member 4              | 3.04 | 2.28 | 0.78 |
| A_52_P302304 | NM_023268 | Qsox1           | 104009 | quiescin Q6 sulfhydryl oxidase 1                           | 6.30 | 2.28 | 0.00 |
| A_52_P373973 | NM_001039 | Mex3c           | 240396 | mex3 homolog C (C. elegans)                                | 3.11 | 2.27 | 0.70 |
| A_51_P270939 | NM_019650 | Gosr2           | 56494  | golgi SNAP receptor complex member 2                       | 5.52 | 2.27 | 0.00 |
| A_51_P357341 | NM_033444 | Clc1            | 114584 | chloride intracellular channel 1                           | 3.65 | 2.27 | 0.30 |
| A_52_P317730 | NA        | NA              | NA     | NA                                                         | 4.14 | 2.27 | 0.14 |
| A_51_P131335 | NM_153568 | Lrrc66          | 231296 | leucine rich repeat containing 66                          | 3.39 | 2.27 | 0.44 |
| A_51_P186476 | NM_013612 | Slc11a1         | 18173  | solute carrier family 11 (proton-coupled divalent metal ic | 3.36 | 2.27 | 0.46 |
| A_51_P297858 | NM_172840 | Vwa2            | 240675 | von Willebrand factor A domain containing 2                | 3.10 | 2.27 | 0.70 |
| A_51_P406315 | NM_009962 | Gpr44           | 14764  | G protein-coupled receptor 44                              | 4.15 | 2.27 | 0.15 |
| A_51_P417313 | NM_001015 | Taf9            | 108143 | TAF9 RNA polymerase II, TATA box binding protein (TBP)-    | 3.50 | 2.27 | 0.36 |
| A_51_P180001 | BC096465  | Eif2c2          | 239528 | eukaryotic translation initiation factor 2C, 2             | 3.13 | 2.26 | 0.68 |
| A_51_P198045 | AK012286  | Rab28           | 100972 | RAB28, member RAS oncogene family                          | 3.15 | 2.26 | 0.65 |
| A_51_P378415 | NM_146002 | Rhbdd2          | 215160 | rhomboid domain containing 2                               | 3.06 | 2.26 | 0.76 |
| A_52_P370473 | BC043039  | Msl1            | 74026  | male-specific lethal 1 homolog (Drosophila)                | 3.26 | 2.26 | 0.53 |
| A_52_P451929 | NM_011090 | Lilra6          | 18726  | leukocyte immunoglobulin-like receptor, subfamily A (wit   | 3.88 | 2.26 | 0.21 |

|              |           |                 |                                                             |      |      |      |
|--------------|-----------|-----------------|-------------------------------------------------------------|------|------|------|
| A_52_P31814  | CB575847  | 1110038B168763  | RIKEN cDNA 1110038B12 gene                                  | 3.23 | 2.26 | 0.58 |
| A_51_P510817 | NM_001025 | Camk2d 108058   | calcium/calmodulin-dependent protein kinase II, delta       | 5.15 | 2.26 | 0.00 |
| A_52_P90337  | NM_010794 | Mgat1 17308     | mannoside acetylglucosaminyltransferase 1                   | 5.19 | 2.25 | 0.00 |
| A_51_P229816 | NM_145445 | Eif2b2 217715   | eukaryotic translation initiation factor 2B, subunit 2 beta | 4.69 | 2.25 | 0.05 |
| A_51_P103261 | NM_009198 | Slc17a1 20504   | solute carrier family 17 (sodium phosphate), member 1       | 4.00 | 2.25 | 0.18 |
| A_51_P408732 | NM_016966 | Phgdh 236539    | 3-phosphoglycerate dehydrogenase                            | 3.28 | 2.25 | 0.52 |
| A_51_P415688 | NM_025278 | Gng12 14701     | guanine nucleotide binding protein (G protein), gamma 1     | 3.44 | 2.25 | 0.40 |
| A_51_P262878 | NM_026211 | Tmed9 67511     | transmembrane emp24 protein transport domain containi       | 4.32 | 2.25 | 0.11 |
| A_51_P337935 | AK008024  | Slc7a15 328059  | solute carrier family 7 (cationic amino acid transporter, y | 3.21 | 2.25 | 0.59 |
| A_52_P324825 | NM_175414 | Tspan9 109246   | tetraspanin 9                                               | 3.68 | 2.25 | 0.29 |
| A_52_P81101  | NM_027184 | Ipmk 69718      | inositol polyphosphate multikinase                          | 3.74 | 2.25 | 0.26 |
| A_52_P460037 | NM_020575 | 7-Mar 57438     | membrane-associated ring finger (C3HC4) 7                   | 3.23 | 2.24 | 0.58 |
| A_52_P525519 | AK142182  | Pkn3 263803     | protein kinase N3                                           | 5.36 | 2.24 | 0.00 |
| A_51_P479833 | XR_002151 | NA NA           | NA                                                          | 2.90 | 2.24 | 1.02 |
| A_51_P501730 | NM_030209 | Crispld2 78892  | cysteine-rich secretory protein LCCL domain containing 2    | 3.14 | 2.24 | 0.67 |
| A_52_P578538 | NM_001039 | NA NA           | NA                                                          | 3.57 | 2.24 | 0.33 |
| A_52_P259214 | L78075    | Cdc42 12540     | cell division cycle 42 homolog ( <i>S. cerevisiae</i> )     | 3.02 | 2.24 | 0.79 |
| A_51_P441983 | NM_008396 | Itga2 16398     | integrin alpha 2                                            | 3.35 | 2.24 | 0.46 |
| A_52_P338530 | NM_029492 | Zdhhc20 75965   | zinc finger, DHHC domain containing 20                      | 3.22 | 2.24 | 0.58 |
| A_51_P507787 | NM_013789 | Sergef 27414    | secretion regulating guanine nucleotide exchange factor     | 6.02 | 2.24 | 0.00 |
| A_51_P221014 | NM_010581 | Cd47 16423      | CD47 antigen (Rh-related antigen, integrin-associated sig   | 3.92 | 2.24 | 0.19 |
| A_51_P346634 | BC025879  | Armcx4 102910   | armadillo repeat containing, X-linked 4                     | 3.00 | 2.24 | 0.85 |
| A_52_P533146 | NM_007837 | Ddit3 13198     | DNA-damage inducible transcript 3                           | 3.06 | 2.24 | 0.75 |
| A_51_P156348 | NM_010771 | Matr3 17184     | matrin 3                                                    | 3.50 | 2.24 | 0.36 |
| A_52_P573366 | NM_178089 | Hnrnpul1 232989 | heterogeneous nuclear ribonucleoprotein U-like 1            | 4.65 | 2.24 | 0.05 |
| A_51_P179864 | NM_016979 | Prkx 19108      | protein kinase, X-linked                                    | 4.16 | 2.24 | 0.15 |
| A_52_P249826 | NM_020259 | Hhip 15245      | Hedgehog-interacting protein                                | 4.19 | 2.24 | 0.13 |
| A_51_P222657 | NM_009775 | Tspo 12257      | translocator protein                                        | 4.71 | 2.24 | 0.06 |
| A_51_P163378 | NA        | NA NA           | NA                                                          | 3.51 | 2.23 | 0.36 |
| A_51_P310135 | NM_011544 | Tcf12 21406     | transcription factor 12                                     | 3.56 | 2.23 | 0.33 |
| A_52_P967353 | NM_001037 | Fam117b 72750   | family with sequence similarity 117, member B               | 3.28 | 2.23 | 0.53 |
| A_51_P496400 | NM_138675 | Med9 192191     | mediator of RNA polymerase II transcription, subunit 9 h    | 6.31 | 2.23 | 0.00 |
| A_51_P216315 | NM_027404 | Bag5 70369      | BCL2-associated athanogene 5                                | 3.14 | 2.23 | 0.66 |
| A_52_P243553 | NM_007905 | Phc1 13619      | polyhomeotic-like 1 ( <i>Drosophila</i> )                   | 5.93 | 2.23 | 0.00 |

|              |           |         |        |                                                             |      |      |      |
|--------------|-----------|---------|--------|-------------------------------------------------------------|------|------|------|
| A_51_P277263 | AK083899  | Rbmx    | 19655  | RNA binding motif protein, X chromosome                     | 4.01 | 2.23 | 0.18 |
| A_51_P428364 | NM_011968 | Psma6   | 26443  | proteasome (prosome, macropain) subunit, alpha type 6       | 4.08 | 2.23 | 0.16 |
| A_51_P103007 | NM_008401 | Itgam   | 16409  | integrin alpha M                                            | 6.03 | 2.23 | 0.00 |
| A_52_P183071 | BC023104  | Rnf146  | 68031  | ring finger protein 146                                     | 3.45 | 2.23 | 0.40 |
| A_51_P139780 | NM_009402 | Pglyrp1 | 21946  | peptidoglycan recognition protein 1                         | 2.99 | 2.22 | 0.85 |
| A_52_P354581 | AK129354  | Smpd4   | 77626  | sphingomyelin phosphodiesterase 4                           | 5.13 | 2.22 | 0.00 |
| A_51_P330125 | NM_029688 | Srxn1   | 76650  | sulfiredoxin 1 homolog (S. cerevisiae)                      | 3.54 | 2.22 | 0.34 |
| A_52_P21971  | NM_008678 | Ncoa2   | 17978  | nuclear receptor coactivator 2                              | 3.21 | 2.22 | 0.59 |
| A_51_P122769 | NM_010914 | Nfyb    | 18045  | nuclear transcription factor-Y beta                         | 4.33 | 2.22 | 0.11 |
| A_51_P224593 | NM_026823 | Arl8a   | 68724  | ADP-ribosylation factor-like 8A                             | 4.42 | 2.21 | 0.08 |
| A_52_P684830 | NM_009318 | Tapbp   | 21356  | TAP binding protein                                         | 3.61 | 2.21 | 0.31 |
| A_52_P130642 | NM_028665 | Ankrd42 | 73845  | ankyrin repeat domain 42                                    | 3.26 | 2.21 | 0.53 |
| A_51_P337246 | NM_023130 | Raly    | 19383  | hnRNP-associated with lethal yellow                         | 2.98 | 2.21 | 0.87 |
| A_52_P370476 | BC043039  | Msl1    | 74026  | male-specific lethal 1 homolog (Drosophila)                 | 3.90 | 2.21 | 0.21 |
| A_51_P103533 | XM_132499 | NA      | NA     | NA                                                          | 3.33 | 2.21 | 0.49 |
| A_52_P450183 | AK122234  | Rapgef5 | 217944 | Rap guanine nucleotide exchange factor (GEF) 5              | 4.49 | 2.21 | 0.09 |
| A_51_P348022 | NM_026623 | Nudt21  | 68219  | nudix (nucleoside diphosphate linked moiety X)-type mol     | 3.85 | 2.21 | 0.22 |
| A_52_P577853 | NM_177239 | Mysm1   | 320713 | myb-like, SWIRM and MPN domains 1                           | 3.61 | 2.21 | 0.31 |
| A_51_P108891 | NM_013745 | Nufip1  | 27275  | nuclear fragile X mental retardation protein interacting p  | 3.30 | 2.21 | 0.52 |
| A_52_P681739 | NM_178760 | Gpr107  | 277463 | G protein-coupled receptor 107                              | 4.42 | 2.20 | 0.08 |
| A_51_P332075 | NM_146054 | Fermt2  | 218952 | fermitin family homolog 2 (Drosophila)                      | 6.29 | 2.20 | 0.00 |
| A_52_P311022 | NM_010279 | Gfra1   | 14585  | glial cell line derived neurotrophic factor family receptor | 3.36 | 2.20 | 0.46 |
| A_52_P274352 | BC053027  | Mapk8   | 26419  | mitogen-activated protein kinase 8                          | 4.67 | 2.20 | 0.05 |
| A_51_P193894 | NM_027375 | Gcc2    | 70297  | GRIP and coiled-coil domain containing 2                    | 5.03 | 2.20 | 0.08 |
| A_51_P146149 | NM_008437 | Napsa   | 16541  | napsin A aspartic peptidase                                 | 3.98 | 2.20 | 0.17 |
| A_52_P498231 | NM_011349 | Sema3f  | 20350  | sema domain, immunoglobulin domain (Ig), short basic d      | 3.72 | 2.20 | 0.27 |
| A_51_P441426 | NM_019932 | Pf4     | 56744  | platelet factor 4                                           | 3.11 | 2.20 | 0.70 |
| A_51_P282424 | NM_025456 | Eapp    | 66266  | E2F-associated phosphoprotein                               | 3.61 | 2.20 | 0.31 |
| A_51_P338040 | NM_146168 | Vopp1   | 232023 | vesicular, overexpressed in cancer, prosurvival protein 1   | 3.34 | 2.20 | 0.47 |
| A_51_P345975 | NM_022883 | Lpin3   | 64899  | lipin 3                                                     | 4.15 | 2.19 | 0.15 |
| A_51_P488340 | NM_016715 | Crlf2   | 57914  | cytokine receptor-like factor 2                             | 5.03 | 2.19 | 0.08 |
| A_51_P136460 | NM_025594 | Zmat2   | 66492  | zinc finger, matrin type 2                                  | 4.58 | 2.19 | 0.09 |
| A_52_P548463 | NM_133365 | Dnahc5  | 110082 | dynein, axonemal, heavy chain 5                             | 2.95 | 2.19 | 0.92 |
| A_51_P315682 | NM_183029 | Igf2bp2 | 319765 | insulin-like growth factor 2 mRNA binding protein 2         | 3.29 | 2.19 | 0.52 |

|              |           |           |        |                                                              |      |      |      |
|--------------|-----------|-----------|--------|--------------------------------------------------------------|------|------|------|
| A_51_P236234 | NM_011346 | Sell      | 20343  | selectin, lymphocyte                                         | 2.96 | 2.19 | 0.91 |
| A_52_P152133 | NM_023124 | H2-Q8     | 15019  | histocompatibility 2, Q region locus 8                       | 4.23 | 2.19 | 0.13 |
| A_52_P483799 | NM_001033 | NA        | NA     | NA                                                           | 3.08 | 2.19 | 0.72 |
| A_52_P6070   | NM_027627 | 4931408AC | 70967  | RIKEN cDNA 4931408A02 gene                                   | 4.42 | 2.18 | 0.08 |
| A_52_P46039  | BC075692  | Kctd18    | 51960  | potassium channel tetramerisation domain containing 18       | 3.64 | 2.18 | 0.31 |
| A_51_P325152 | NM_177374 | Trmt61a   | 328162 | tRNA methyltransferase 61 homolog A ( <i>S. cerevisiae</i> ) | 4.16 | 2.18 | 0.15 |
| A_51_P207550 | NM_023196 | Pla2g12a  | 66350  | phospholipase A2, group X1IA                                 | 4.15 | 2.18 | 0.15 |
| A_51_P317618 | NM_025795 | Ncaph2    | 52683  | non-SMC condensin II complex, subunit H2                     | 3.26 | 2.17 | 0.53 |
| A_52_P533287 | NM_013637 | Prm1      | 19118  | protamine 1                                                  | 3.63 | 2.17 | 0.31 |
| A_52_P83888  | AK053567  | Cflar     | 12633  | CASP8 and FADD-like apoptosis regulator                      | 3.72 | 2.17 | 0.27 |
| A_52_P17228  | NM_177093 | Lrrc58    | 320184 | leucine rich repeat containing 58                            | 5.99 | 2.17 | 0.00 |
| A_52_P492411 | NM_009256 | Serpinb9  | 20723  | serine (or cysteine) peptidase inhibitor, clade B, member    | 3.43 | 2.17 | 0.40 |
| A_51_P433960 | NM_011890 | Sgcb      | 24051  | sarcoglycan, beta (dystrophin-associated glycoprotein)       | 5.19 | 2.17 | 0.00 |
| A_52_P385809 | NM_145493 | Cplx4     | 225644 | complexin 4                                                  | 4.12 | 2.16 | 0.14 |
| A_51_P152845 | NM_145076 | Trim24    | 21848  | tripartite motif-containing 24                               | 3.59 | 2.16 | 0.32 |
| A_52_P322141 | BC038890  | Ccdc88b   | 78317  | coiled-coil domain containing 88B                            | 4.05 | 2.16 | 0.16 |
| A_52_P450045 | NM_011276 | Rlim      | 19820  | ring finger protein, LIM domain interacting                  | 2.94 | 2.16 | 0.93 |
| A_52_P281543 | NM_175507 | Tmem20    | 240660 | transmembrane protein 20                                     | 2.99 | 2.16 | 0.85 |
| A_51_P515585 | NM_026017 | Dullard   | 67181  | Dullard homolog ( <i>Xenopus laevis</i> )                    | 3.24 | 2.16 | 0.56 |
| A_52_P496628 | NM_175381 | 2700081O1 | 108899 | RIKEN cDNA 2700081O15 gene                                   | 4.09 | 2.16 | 0.16 |
| A_51_P453010 | NM_026758 | Mphosph6  | 68533  | M phase phosphoprotein 6                                     | 3.77 | 2.16 | 0.25 |
| A_51_P165041 | AF049125  | Rcn2      | 26611  | reticulocalbin 2                                             | 4.49 | 2.16 | 0.09 |
| A_51_P487941 | NM_183286 | Dhrs13    | 70451  | dehydrogenase/reductase (SDR family) member 13               | 4.18 | 2.15 | 0.12 |
| A_51_P513244 | XM_150216 | 493042210 | 71640  | RIKEN cDNA 4930422107 gene                                   | 3.26 | 2.15 | 0.53 |
| A_51_P518621 | NM_013550 | Hist1h3a  | 360198 | histone cluster 1, H3a                                       | 3.65 | 2.15 | 0.30 |
| A_52_P337740 | AK030611  | NA        | NA     | NA                                                           | 3.47 | 2.15 | 0.39 |
| A_52_P37522  | NM_175266 | Epm2aip1  | 77781  | EPM2A (laforin) interacting protein 1                        | 4.45 | 2.15 | 0.08 |
| A_52_P272534 | NA        | NA        | NA     | NA                                                           | 3.44 | 2.15 | 0.40 |
| A_52_P158800 | NM_010207 | Fgfr2     | 14183  | fibroblast growth factor receptor 2                          | 2.96 | 2.15 | 0.91 |
| A_52_P309337 | NM_019648 | Metap2    | 56307  | methionine aminopeptidase 2                                  | 3.55 | 2.15 | 0.34 |
| A_52_P83233  | NM_011728 | Xpa       | 22590  | xeroderma pigmentosum, complementation group A               | 3.89 | 2.14 | 0.21 |
| A_52_P660100 | NM_025778 | Bcl2l14   | 66813  | BCL2-like 14 (apoptosis facilitator)                         | 2.93 | 2.14 | 0.96 |
| A_52_P442370 | NM_022328 | Mllt1     | 64144  | myeloid/lymphoid or mixed-lineage leukemia (trithorax l      | 4.10 | 2.14 | 0.14 |
| A_51_P516860 | AK122234  | Rapgef5   | 217944 | Rap guanine nucleotide exchange factor (GEF) 5               | 4.03 | 2.14 | 0.16 |

|              |           |           |        |                                                          |      |      |      |
|--------------|-----------|-----------|--------|----------------------------------------------------------|------|------|------|
| A_51_P288162 | NM_197982 | Ddx39     | 68278  | DEAD (Asp-Glu-Ala-Asp) box polypeptide 39                | 3.50 | 2.14 | 0.36 |
| A_52_P196138 | BC038386  | Cep110    | 26920  | centrosomal protein 110                                  | 4.33 | 2.14 | 0.11 |
| A_52_P673152 | NM_178729 | Fbxl5     | 242960 | F-box and leucine-rich repeat protein 5                  | 3.11 | 2.14 | 0.70 |
| A_51_P473252 | NM_011777 | Zyx       | 22793  | zyxin                                                    | 3.63 | 2.14 | 0.31 |
| A_52_P635182 | NM_009101 | Rras      | 20130  | Harvey rat sarcoma oncogene, subgroup R                  | 5.71 | 2.14 | 0.00 |
| A_51_P446510 | NM_010129 | Emp3      | 13732  | epithelial membrane protein 3                            | 4.27 | 2.14 | 0.10 |
| A_51_P179688 | NM_026327 | 1810048J1 | 67708  | RIKEN cDNA 1810048J11 gene                               | 4.07 | 2.14 | 0.16 |
| A_51_P434697 | NM_144839 | Ube2e2    | 218793 | ubiquitin-conjugating enzyme E2E 2 (UBC4/5 homolog, y    | 3.87 | 2.14 | 0.22 |
| A_52_P449417 | BC024687  | Vangl1    | 229658 | vang-like 1 (van gogh, Drosophila)                       | 5.14 | 2.14 | 0.00 |
| A_51_P331212 | AK034732  | Prmt6     | 99890  | protein arginine N-methyltransferase 6                   | 4.26 | 2.14 | 0.10 |
| A_52_P74883  | BC082311  | Myo16     | 244281 | myosin XVI                                               | 3.96 | 2.14 | 0.17 |
| A_51_P101196 | NM_011189 | Psme1     | 19186  | proteasome (prosome, macropain) 28 subunit, alpha        | 4.14 | 2.14 | 0.15 |
| A_52_P581440 | NM_153423 | Wasf2     | 242687 | WAS protein family, member 2                             | 4.64 | 2.13 | 0.05 |
| A_52_P287338 | NM_025829 | Eif4e3    | 66892  | eukaryotic translation initiation factor 4E member 3     | 3.66 | 2.13 | 0.28 |
| A_51_P306731 | NM_172715 | Agpat9    | 231510 | 1-acylglycerol-3-phosphate O-acyltransferase 9           | 4.57 | 2.13 | 0.09 |
| A_52_P378257 | XM_283937 | NA        | NA     | NA                                                       | 4.19 | 2.13 | 0.13 |
| A_51_P126835 | NM_001025 | 2700007P2 | 212772 | RIKEN cDNA 2700007P21 gene                               | 3.24 | 2.13 | 0.56 |
| A_51_P319805 | NM_203492 | Mrgprg    | 381974 | MAS-related GPR, member G                                | 3.29 | 2.13 | 0.52 |
| A_52_P505413 | NM_023663 | Ripk4     | 72388  | receptor-interacting serine-threonine kinase 4           | 3.16 | 2.13 | 0.65 |
| A_52_P596929 | NM_028291 | Pan3      | 72587  | PAN3 polyA specific ribonuclease subunit homolog (S. cei | 3.57 | 2.13 | 0.33 |
| A_52_P150988 | NM_029582 | Txndc11   | 106200 | thioredoxin domain containing 11                         | 3.90 | 2.13 | 0.21 |
| A_51_P109508 | NM_134250 | Havcr2    | 171285 | hepatitis A virus cellular receptor 2                    | 3.75 | 2.13 | 0.26 |
| A_52_P415750 | NM_021439 | Chst11    | 58250  | carbohydrate sulfotransferase 11                         | 2.91 | 2.13 | 0.99 |
| A_52_P433643 | NM_170599 | Igsf11    | 207683 | immunoglobulin superfamily, member 11                    | 4.86 | 2.13 | 0.07 |
| A_52_P238873 | BC098509  | 3110003A1 | 73112  | RIKEN cDNA 3110003A17 gene                               | 6.59 | 2.12 | 0.00 |
| A_52_P233441 | NM_008090 | Gata2     | 14461  | GATA binding protein 2                                   | 3.71 | 2.12 | 0.28 |
| A_51_P389531 | NM_019830 | Prmt1     | 15469  | protein arginine N-methyltransferase 1                   | 3.49 | 2.12 | 0.38 |
| A_52_P448648 | NM_021411 | Rab37     | 58222  | RAB37, member of RAS oncogene family                     | 3.32 | 2.12 | 0.49 |
| A_52_P497534 | NM_145940 | Wipi1     | 52639  | WD repeat domain, phosphoinositide interacting 1         | 3.69 | 2.12 | 0.29 |
| A_51_P504672 | NM_133665 | Mef2d     | 17261  | myocyte enhancer factor 2D                               | 3.12 | 2.12 | 0.68 |
| A_51_P468762 | NM_198027 | Alkbh6    | 233065 | alkB, alkylation repair homolog 6 (E. coli)              | 4.29 | 2.12 | 0.10 |
| A_52_P522210 | NM_183428 | Epb4.1    | 269587 | erythrocyte protein band 4.1                             | 4.51 | 2.12 | 0.09 |
| A_51_P249009 | NM_030714 | Dtx3      | 80904  | deltex 3 homolog (Drosophila)                            | 4.41 | 2.11 | 0.08 |
| A_52_P14666  | XM_888940 | Hnrnpa1l2 | 544954 | heterogeneous nuclear ribonucleoprotein A1-like 2        | 3.11 | 2.11 | 0.70 |

|              |           |           |        |                                                            |      |      |      |
|--------------|-----------|-----------|--------|------------------------------------------------------------|------|------|------|
| A_51_P142989 | XM_920647 | NA        | NA     | NA                                                         | 3.58 | 2.11 | 0.33 |
| A_51_P157112 | NM_008458 | Serpina3c | 16625  | serine (or cysteine) peptidase inhibitor, clade A, member  | 2.99 | 2.10 | 0.85 |
| A_51_P464478 | NM_001008 | Il4ra     | 16190  | interleukin 4 receptor, alpha                              | 4.19 | 2.10 | 0.12 |
| A_51_P433870 | NM_009506 | Vegfc     | 22341  | vascular endothelial growth factor C                       | 5.14 | 2.10 | 0.00 |
| A_51_P487384 | NM_029564 | Tax1bp3   | 76281  | Tax1 (human T-cell leukemia virus type I) binding protein  | 5.73 | 2.10 | 0.00 |
| A_52_P418494 | NM_028447 | Prrc1     | 73137  | proline-rich coiled-coil 1                                 | 3.03 | 2.10 | 0.79 |
| A_51_P515173 | NM_172941 | Zkscan17  | 268417 | zinc finger with KRAB and SCAN domains 17                  | 3.84 | 2.09 | 0.22 |
| A_52_P106739 | NM_145975 | Ddx46     | 212880 | DEAD (Asp-Glu-Ala-Asp) box polypeptide 46                  | 3.39 | 2.09 | 0.44 |
| A_51_P415247 | NA        | NA        | NA     | NA                                                         | 3.79 | 2.09 | 0.23 |
| A_52_P189897 | NM_001039 | Gtf2a2    | 235459 | general transcription factor II A, 2                       | 4.22 | 2.09 | 0.13 |
| A_52_P292965 | AK040733  | 9330159M1 | 319673 | RIKEN cDNA 9330159M07 gene                                 | 4.06 | 2.09 | 0.16 |
| A_52_P101221 | NM_153178 | Eif2c2    | 239528 | eukaryotic translation initiation factor 2C, 2             | 2.91 | 2.09 | 0.99 |
| A_52_P448936 | AK078894  | Ppp2r5e   | 26932  | protein phosphatase 2, regulatory subunit B (B56), epsilon | 3.53 | 2.09 | 0.34 |
| A_51_P242400 | NM_031170 | Krt8      | 16691  | keratin 8                                                  | 2.97 | 2.09 | 0.89 |
| A_52_P537590 | XM_129214 | Pcsk5     | 18552  | proprotein convertase subtilisin/kexin type 5              | 5.35 | 2.09 | 0.00 |
| A_51_P328760 | NM_027470 | Pak4      | 70584  | p21 protein (Cdc42/Rac)-activated kinase 4                 | 3.96 | 2.09 | 0.17 |
| A_51_P177744 | NM_028864 | Zc3hav1   | 78781  | zinc finger CCCH type, antiviral 1                         | 2.90 | 2.09 | 0.99 |
| A_51_P179492 | NM_026558 | Fam92a    | 68099  | family with sequence similarity 92, member A               | 4.60 | 2.09 | 0.10 |
| A_51_P437050 | AK043598  | Heg1      | 77446  | HEG homolog 1 (zebrafish)                                  | 4.05 | 2.08 | 0.16 |
| A_52_P246831 | NM_025475 | Haus2     | 66296  | HAUS augmin-like complex, subunit 2                        | 2.93 | 2.08 | 0.95 |
| A_52_P414750 | XM_133543 | Akap13    | 75547  | A kinase (PRKA) anchor protein 13                          | 4.28 | 2.08 | 0.10 |
| A_51_P290231 | NM_010480 | Hsp90aa1  | 15519  | heat shock protein 90, alpha (cytosolic), class A member   | 4.37 | 2.08 | 0.11 |
| A_51_P253547 | NM_009984 | Ctsl      | 13039  | cathepsin L                                                | 4.31 | 2.08 | 0.11 |
| A_52_P957260 | NA        | NA        | NA     | NA                                                         | 3.80 | 2.07 | 0.24 |
| A_51_P519950 | AK033374  | Rsbn1l    | 242860 | round spermatid basic protein 1-like                       | 3.08 | 2.07 | 0.71 |
| A_51_P219789 | NM_010392 | H2-Q2     | 15013  | histocompatibility 2, Q region locus 2                     | 6.36 | 2.07 | 0.00 |
| A_51_P294288 | NM_146002 | Rhbdd2    | 215160 | rhombooid domain containing 2                              | 3.63 | 2.07 | 0.31 |
| A_52_P677822 | NM_153059 | Tmem5     | 216395 | transmembrane protein 5                                    | 4.19 | 2.07 | 0.12 |
| A_52_P327381 | NM_022424 | Fndc4     | 64339  | fibronectin type III domain containing 4                   | 3.35 | 2.07 | 0.46 |
| A_51_P503953 | NM_027993 | 2310028H2 | 71901  | RIKEN cDNA 2310028H24 gene                                 | 7.55 | 2.07 | 0.00 |
| A_51_P161037 | AK172953  | Cep170    | 545389 | centrosomal protein 170                                    | 3.03 | 2.07 | 0.79 |
| A_52_P351694 | NM_199299 | Phf15     | 76901  | PHD finger protein 15                                      | 5.10 | 2.07 | 0.00 |
| A_51_P114941 | NM_007819 | Cyp3a13   | 13113  | cytochrome P450, family 3, subfamily a, polypeptide 13     | 4.71 | 2.07 | 0.06 |
| A_52_P520495 | NM_011693 | Vcam1     | 22329  | vascular cell adhesion molecule 1                          | 4.44 | 2.07 | 0.08 |

|              |            |           |        |                                                              |      |      |      |
|--------------|------------|-----------|--------|--------------------------------------------------------------|------|------|------|
| A_51_P262079 | NM_010394  | H2-Q7     | 15018  | histocompatibility 2, Q region locus 7                       | 6.38 | 2.07 | 0.00 |
| A_51_P472901 | NM_008577  | Slc3a2    | 17254  | solute carrier family 3 (activators of dibasic and neutral a | 3.06 | 2.07 | 0.75 |
| A_52_P663413 | NM_011031  | P4ha2     | 18452  | procollagen-proline, 2-oxoglutarate 4-dioxygenase (proli     | 3.63 | 2.07 | 0.31 |
| A_52_P193301 | NM_025519  | Chmp4c    | 66371  | chromatin modifying protein 4C                               | 3.08 | 2.07 | 0.71 |
| A_51_P483329 | NM_172713  | Sdad1     | 231452 | SDA1 domain containing 1                                     | 3.03 | 2.06 | 0.79 |
| A_52_P418489 | NM_023476  | Tinagl1   | 94242  | tubulointerstitial nephritis antigen-like 1                  | 3.32 | 2.06 | 0.49 |
| A_51_P441286 | NM_177625  | Ttc5      | 219022 | tetratricopeptide repeat domain 5                            | 4.70 | 2.06 | 0.05 |
| A_51_P409694 | NM_019976  | Psrc1     | 56742  | proline/serine-rich coiled-coil 1                            | 4.10 | 2.06 | 0.14 |
| A_52_P369415 | NM_207649  | Rcan2     | 53901  | regulator of calcineurin 2                                   | 9.52 | 2.06 | 0.00 |
| A_51_P209280 | NM_133685  | Rab31     | 106572 | RAB31, member RAS oncogene family                            | 5.79 | 2.06 | 0.00 |
| A_51_P200083 | NM_023168  | Grina     | 66168  | glutamate receptor, ionotropic, N-methyl D-aspartate-as:     | 5.15 | 2.06 | 0.00 |
| A_51_P306031 | NA         | NA        | NA     | NA                                                           | 2.99 | 2.06 | 0.85 |
| A_51_P226794 | NM_001033: | 9-Mar     | 216438 | membrane-associated ring finger (C3HC4) 9                    | 4.78 | 2.06 | 0.06 |
| A_52_P250517 | NM_011743  | Zfp106    | 20402  | zinc finger protein 106                                      | 3.35 | 2.06 | 0.47 |
| A_51_P406306 | NM_172655  | Hecw2     | 329152 | HECT, C2 and WW domain containing E3 ubiquitin protei        | 3.03 | 2.06 | 0.79 |
| A_51_P470769 | NM_033592  | Pcdhga9   | 93717  | protocadherin gamma subfamily A, 9                           | 3.62 | 2.06 | 0.31 |
| A_51_P392291 | NM_145630  | Pdk3      | 236900 | pyruvate dehydrogenase kinase, isoenzyme 3                   | 5.63 | 2.06 | 0.00 |
| A_51_P497295 | NM_027455  | Qpct      | 70536  | glutaminy-peptide cyclotransferase (glutaminy cyclase)       | 4.91 | 2.06 | 0.07 |
| A_51_P221291 | NM_009229  | Sntb2     | 20650  | syntrophin, basic 2                                          | 3.38 | 2.06 | 0.45 |
| A_52_P597860 | NM_153423  | Wasf2     | 242687 | WAS protein family, member 2                                 | 3.20 | 2.06 | 0.60 |
| A_51_P454726 | NM_001039: | Gtf2a2    | 235459 | general transcription factor II A, 2                         | 4.30 | 2.05 | 0.11 |
| A_51_P128929 | NM_020559  | Alas1     | 11655  | aminolevulinic acid synthase 1                               | 3.34 | 2.05 | 0.47 |
| A_51_P470228 | NM_001033: | Spryd3    | 223918 | SPRY domain containing 3                                     | 4.95 | 2.05 | 0.07 |
| A_51_P225123 | NM_016883  | Psmd10    | 53380  | proteasome (prosome, macropain) 26S subunit, non-ATP         | 3.63 | 2.05 | 0.31 |
| A_52_P296208 | NM_172480  | Mtrr      | 210009 | 5-methyltetrahydrofolate-homocysteine methyltransfera        | 3.32 | 2.05 | 0.49 |
| A_52_P217710 | NM_008056  | Fzd6      | 14368  | frizzled homolog 6 (Drosophila)                              | 3.35 | 2.05 | 0.46 |
| A_51_P360004 | NM_029021  | 4833422F2 | 74614  | RIKEN cDNA 4833422F24 gene                                   | 3.06 | 2.05 | 0.76 |
| A_51_P389814 | NM_011349  | Sema3f    | 20350  | sema domain, immunoglobulin domain (Ig), short basic d       | 3.82 | 2.05 | 0.24 |
| A_51_P477863 | NM_012032  | Serinc3   | 26943  | serine incorporator 3                                        | 3.40 | 2.05 | 0.42 |
| A_52_P268127 | NM_172473  | Hace1     | 209462 | HECT domain and ankyrin repeat containing, E3 ubiquitin      | 3.36 | 2.05 | 0.46 |
| A_52_P646832 | NM_023380  | Samsn1    | 67742  | SAM domain, SH3 domain and nuclear localization signal:      | 3.12 | 2.04 | 0.70 |
| A_52_P432037 | NM_021330  | Acp1      | 11431  | acid phosphatase 1, soluble                                  | 3.54 | 2.04 | 0.34 |
| A_52_P372843 | AK161097   | Sfrs13a   | 14105  | splicing factor, arginine/serine-rich 13A                    | 3.42 | 2.04 | 0.42 |
| A_51_P169617 | NM_027748  | Taf3      | 209361 | TAF3 RNA polymerase II, TATA box binding protein (TBP)-      | 3.25 | 2.04 | 0.55 |

|              |           |           |        |                                                            |      |      |      |
|--------------|-----------|-----------|--------|------------------------------------------------------------|------|------|------|
| A_52_P93467  | NM_011521 | Sdc4      | 20971  | syndecan 4                                                 | 3.11 | 2.04 | 0.70 |
| A_52_P573336 | NM_172205 | Sbsn      | 282619 | suprabasin                                                 | 3.08 | 2.04 | 0.72 |
| A_51_P437938 | NM_198006 | 6330578E1 | 76178  | RIKEN cDNA 6330578E17 gene                                 | 3.23 | 2.04 | 0.58 |
| A_52_P427174 | NM_030713 | Zfp202    | 80902  | zinc finger protein 202                                    | 5.40 | 2.04 | 0.00 |
| A_52_P282276 | NM_175145 | Tmem127   | 69470  | transmembrane protein 127                                  | 4.20 | 2.04 | 0.13 |
| A_51_P115326 | NM_011512 | Surf4     | 20932  | surfeit gene 4                                             | 3.79 | 2.04 | 0.23 |
| A_52_P245365 | XM_283757 | Rtf1      | 76246  | Rtf1, Paf1/RNA polymerase II complex component, homc       | 4.20 | 2.03 | 0.13 |
| A_51_P438821 | NM_023258 | Pycard    | 66824  | PYD and CARD domain containing                             | 3.60 | 2.03 | 0.32 |
| A_51_P266717 | NA        | NA        | NA     | NA                                                         | 3.93 | 2.03 | 0.19 |
| A_51_P151254 | NM_134060 | Slc35b3   | 108652 | solute carrier family 35, member B3                        | 2.98 | 2.03 | 0.87 |
| A_52_P973486 | BI329779  | NA        | NA     | NA                                                         | 3.16 | 2.03 | 0.65 |
| A_52_P925038 | NA        | NA        | NA     | NA                                                         | 3.52 | 2.03 | 0.35 |
| A_51_P324814 | NM_010664 | Krt18     | 16668  | keratin 18                                                 | 3.12 | 2.03 | 0.70 |
| A_52_P406216 | NA        | NA        | NA     | NA                                                         | 5.03 | 2.03 | 0.08 |
| A_52_P656860 | NM_026232 | Slc25a30  | 67554  | solute carrier family 25, member 30                        | 3.79 | 2.03 | 0.23 |
| A_52_P638121 | XM_001001 | NA        | NA     | NA                                                         | 5.36 | 2.03 | 0.00 |
| A_51_P179498 | NM_026558 | Fam92a    | 68099  | family with sequence similarity 92, member A               | 5.75 | 2.03 | 0.00 |
| A_52_P395220 | NM_026609 | Leprotl1  | 68192  | leptin receptor overlapping transcript-like 1              | 7.11 | 2.03 | 0.00 |
| A_52_P622941 | AK034948  | Slc25a37  | 67712  | solute carrier family 25, member 37                        | 2.92 | 2.03 | 0.98 |
| A_51_P455208 | NM_011204 | Ptpn13    | 19249  | protein tyrosine phosphatase, non-receptor type 13         | 3.04 | 2.03 | 0.79 |
| A_51_P225634 | NM_027306 | Zdhhc25   | 70073  | zinc finger, DHHC domain containing 25                     | 4.49 | 2.03 | 0.09 |
| A_51_P114910 | NM_007793 | Cstb      | 13014  | cystatin B                                                 | 5.06 | 2.03 | 0.09 |
| A_52_P561394 | AK051292  | BC005537  | 79555  | cDNA sequence BC005537                                     | 3.32 | 2.02 | 0.49 |
| A_52_P483680 | AK079998  | Zmpste24  | 230709 | zinc metallopeptidase, STE24 homolog (S. cerevisiae)       | 3.48 | 2.02 | 0.37 |
| A_51_P202950 | AK010701  | Dedd2     | 67379  | death effector domain-containing DNA binding protein 2     | 3.06 | 2.02 | 0.75 |
| A_51_P221274 | NM_013784 | Pign      | 27392  | phosphatidylinositol glycan anchor biosynthesis, class N   | 5.46 | 2.02 | 0.00 |
| A_51_P389714 | AK146878  | Phlpp2    | 244650 | PH domain and leucine rich repeat protein phosphatase 2    | 3.14 | 2.02 | 0.67 |
| A_52_P21574  | AK033091  | Pdlim7    | 67399  | PDZ and LIM domain 7                                       | 3.70 | 2.02 | 0.27 |
| A_52_P83363  | AK015025  | Ralgapa1  | 56784  | Ral GTPase activating protein, alpha subunit 1             | 3.98 | 2.02 | 0.17 |
| A_51_P236991 | NM_028156 | 1700001P0 | 72215  | RIKEN cDNA 1700001P01 gene                                 | 3.23 | 2.02 | 0.58 |
| A_51_P185757 | NM_177569 | NA        | NA     | NA                                                         | 3.04 | 2.02 | 0.78 |
| A_51_P328613 | NM_010188 | Fcgr3     | 14131  | Fc receptor, IgG, low affinity III                         | 3.46 | 2.02 | 0.38 |
| A_52_P609200 | NM_012032 | Serinc3   | 26943  | serine incorporator 3                                      | 5.15 | 2.02 | 0.00 |
| A_52_P642056 | NM_053194 | Ric8      | 101489 | resistance to inhibitors of cholinesterase 8 homolog (C. e | 4.24 | 2.02 | 0.13 |



|              |           |           |        |                                                            |      |      |      |
|--------------|-----------|-----------|--------|------------------------------------------------------------|------|------|------|
| A_52_P625672 | AK039294  | Lysmd4    | 75099  | LysM, putative peptidoglycan-binding, domain containing    | 5.18 | 2.02 | 0.00 |
| A_52_P542912 | NM_144846 | Fam49b    | 223601 | family with sequence similarity 49, member B               | 3.65 | 2.02 | 0.30 |
| A_51_P521125 | NM_025740 | Ccdc104   | 216618 | coiled-coil domain containing 104                          | 3.30 | 2.02 | 0.52 |
| A_52_P625277 | NM_183220 | Accs      | 329470 | 1-aminocyclopropane-1-carboxylate synthase homolog (μ      | 3.15 | 2.02 | 0.66 |
| A_51_P152216 | NM_025693 | Tmem41a   | 66664  | transmembrane protein 41a                                  | 4.91 | 2.02 | 0.07 |
| A_51_P485594 | NM_025729 | Tab3      | 66724  | TGF-beta activated kinase 1/MAP3K7 binding protein 3       | 3.87 | 2.02 | 0.22 |
| A_51_P447835 | NM_013737 | Pla2g7    | 27226  | phospholipase A2, group VII (platelet-activating factor ac | 3.57 | 2.02 | 0.33 |
| A_51_P386358 | NM_025830 | Wwp2      | 66894  | WW domain containing E3 ubiquitin protein ligase 2         | 4.64 | 2.02 | 0.05 |
| A_51_P355151 | AK013788  | Camk2n2   | 73047  | calcium/calmodulin-dependent protein kinase II inhibitor   | 5.87 | 2.01 | 0.00 |
| A_52_P169048 | NM_007872 | Dnmt3a    | 13435  | DNA methyltransferase 3A                                   | 3.87 | 2.01 | 0.20 |
| A_51_P169693 | NM_198095 | Bst2      | 69550  | bone marrow stromal cell antigen 2                         | 3.64 | 2.01 | 0.30 |
| A_52_P73214  | NM_172977 | Gtf3c4    | 269252 | general transcription factor IIIC, polypeptide 4           | 2.96 | 2.01 | 0.92 |
| A_52_P632742 | NM_025858 | Shisa5    | 66940  | shisa homolog 5 ( <i>Xenopus laevis</i> )                  | 4.09 | 2.01 | 0.16 |
| A_52_P670172 | NM_198627 | Vstm2l    | 277432 | V-set and transmembrane domain containing 2-like           | 4.07 | 2.01 | 0.16 |
| A_51_P214679 | BC098509  | 3110003A1 | 73112  | RIKEN cDNA 3110003A17 gene                                 | 4.70 | 2.01 | 0.05 |
| A_51_P506236 | NM_016691 | Clcn5     | 12728  | chloride channel 5                                         | 2.93 | 2.01 | 0.95 |
| A_52_P9425   | NA        | NA        | NA     | NA                                                         | 3.62 | 2.01 | 0.31 |
| A_51_P240019 | NM_013755 | Gyg       | 27357  | glycogenin                                                 | 3.09 | 2.01 | 0.71 |
| A_52_P101142 | NM_018880 | Trim3     | 55992  | tripartite motif-containing 3                              | 3.28 | 2.01 | 0.53 |
| A_52_P32402  | NM_025286 | Slc31a2   | 20530  | solute carrier family 31, member 2                         | 3.49 | 2.01 | 0.38 |
| A_51_P355821 | NM_026999 | Zfp688    | 69234  | zinc finger protein 688                                    | 4.07 | 2.01 | 0.16 |
| A_52_P214126 | NM_009662 | Alox5     | 11689  | arachidonate 5-lipoxygenase                                | 4.35 | 2.01 | 0.11 |
| A_51_P266168 | NM_001039 | Eif4e2    | 26987  | eukaryotic translation initiation factor 4E member 2       | 4.46 | 2.00 | 0.08 |
| A_51_P460302 | NM_130863 | Adrbk1    | 110355 | adrenergic receptor kinase, beta 1                         | 3.44 | 2.00 | 0.40 |
| A_51_P131168 | NM_001012 | Ccdc55    | 237859 | coiled-coil domain containing 55                           | 4.31 | 2.00 | 0.11 |
| A_51_P307427 | XM_001000 | NA        | NA     | NA                                                         | 3.62 | 2.00 | 0.31 |
| A_51_P481052 | NM_026531 | Aen       | 68048  | apoptosis enhancing nuclease                               | 3.60 | 2.00 | 0.32 |
| A_51_P197745 | AK173144  | Ssh1      | 231637 | slingshot homolog 1 ( <i>Drosophila</i> )                  | 4.06 | 2.00 | 0.16 |
| A_52_P499297 | NM_019831 | Zmym3     | 56364  | zinc finger, MYM-type 3                                    | 3.43 | 2.00 | 0.40 |
| A_52_P540045 | AK083897  | NA        | NA     | NA                                                         | 3.11 | 2.00 | 0.70 |
| A_52_P499027 | NM_001039 | Eif4e2    | 26987  | eukaryotic translation initiation factor 4E member 2       | 4.58 | 2.00 | 0.09 |
| A_51_P441312 | BC099486  | LOC100043 | 1E+08  | similar to development and differentiation enhancing fac   | 3.43 | 2.00 | 0.40 |
| A_52_P7400   | NM_007793 | Cstb      | 13014  | cystatin B                                                 | 5.44 | 2.00 | 0.00 |
| A_52_P560038 | NM_153589 | Ano2      | 243634 | anoctamin 2                                                | 3.48 | 2.00 | 0.39 |

|               |           |            |        |                                                        |      |      |      |
|---------------|-----------|------------|--------|--------------------------------------------------------|------|------|------|
| A_51_P494006  | BC075621  | Rbm16      | 106583 | RNA binding motif protein 16                           | 3.47 | 2.00 | 0.39 |
| A_51_P242399  | NM_031170 | Krt8       | 16691  | keratin 8                                              | 3.58 | 2.00 | 0.33 |
| A_52_P1020860 | AK153119  | AW112010   | 107350 | expressed sequence AW112010                            | 3.08 | 2.00 | 0.72 |
| A_51_P207540  | NM_146826 | Olfr969    | 258823 | olfactory receptor 969                                 | 4.14 | 1.99 | 0.15 |
| A_52_P503927  | NM_001033 | Tmem181a   | 77106  | transmembrane protein 181A                             | 3.08 | 1.99 | 0.72 |
| A_51_P119460  | NM_133196 | Cstf2      | 108062 | cleavage stimulation factor, 3' pre-RNA subunit 2      | 2.96 | 1.99 | 0.92 |
| A_51_P393255  | NM_028534 | Smap1      | 98366  | stromal membrane-associated protein 1                  | 3.61 | 1.99 | 0.31 |
| A_52_P446644  | NA        | NA         | NA     | NA                                                     | 4.30 | 1.99 | 0.11 |
| A_51_P485542  | NM_018737 | Ctps2      | 55936  | cytidine 5'-triphosphate synthase 2                    | 4.31 | 1.99 | 0.11 |
| A_51_P381584  | NM_021433 | Stx6       | 58244  | syntaxin 6                                             | 4.91 | 1.99 | 0.07 |
| A_52_P453684  | AK021086  | Lrp6       | 16974  | low density lipoprotein receptor-related protein 6     | 3.42 | 1.99 | 0.42 |
| A_51_P459108  | NM_013754 | Insl6      | 27356  | insulin-like 6                                         | 4.28 | 1.99 | 0.10 |
| A_52_P171160  | NM_177281 | D930030D   | 320874 | RIKEN cDNA D930030D11 gene                             | 3.88 | 1.98 | 0.20 |
| A_51_P248265  | NM_153552 | Thoc1      | 225160 | THO complex 1                                          | 3.11 | 1.98 | 0.70 |
| A_51_P130427  | NM_009439 | Psmd3      | 22123  | proteasome (prosome, macropain) 26S subunit, non-ATP   | 3.11 | 1.98 | 0.70 |
| A_51_P464576  | NM_008943 | Psen1      | 19164  | presenilin 1                                           | 2.91 | 1.98 | 0.98 |
| A_51_P360165  | NM_007635 | Ccng2      | 12452  | cyclin G2                                              | 2.94 | 1.98 | 0.93 |
| A_52_P116018  | XM_129134 | Aldh3b2    | 621603 | aldehyde dehydrogenase 3 family, member B2             | 3.02 | 1.98 | 0.79 |
| A_51_P177106  | X89690    | Olfr29-ps1 | 29848  | olfactory receptor 29, pseudogene 1                    | 3.62 | 1.98 | 0.31 |
| A_51_P461884  | NM_009595 | Abl2       | 11352  | v-abl Abelson murine leukemia viral oncogene homolog 2 | 4.05 | 1.98 | 0.16 |
| A_52_P404329  | NM_011316 | Saa4       | 20211  | serum amyloid A 4                                      | 3.40 | 1.98 | 0.42 |
| A_52_P539361  | NM_001033 | 2610002J0  | 67513  | RIKEN cDNA 2610002J02 gene                             | 3.60 | 1.98 | 0.32 |
| A_51_P415809  | NM_026954 | Tusc1      | 69136  | tumor suppressor candidate 1                           | 4.02 | 1.98 | 0.18 |
| A_51_P518528  | NM_172920 | Dpy19l1    | 244745 | dpy-19-like 1 (C. elegans)                             | 3.29 | 1.98 | 0.52 |
| A_51_P306658  | NM_133939 | Naa38      | 76522  | N(alpha)-acetyltransferase 38, NatC auxiliary subunit  | 4.69 | 1.98 | 0.05 |
| A_52_P451041  | NM_133795 | Ttc1       | 66827  | tetratricopeptide repeat domain 1                      | 4.04 | 1.97 | 0.16 |
| A_52_P275348  | NM_029012 | Sppl3      | 74585  | signal peptide peptidase 3                             | 3.03 | 1.97 | 0.79 |
| A_52_P520909  | AK143078  | Tmem214    | 68796  | transmembrane protein 214                              | 2.92 | 1.97 | 0.98 |
| A_52_P537566  | NM_177150 | Cenpt      | 320394 | centromere protein T                                   | 5.67 | 1.97 | 0.00 |
| A_52_P67079   | NM_027185 | Def6       | 23853  | differentially expressed in FDCP 6                     | 7.82 | 1.97 | 0.00 |
| A_52_P26357   | AK129064  | Arhgef7    | 54126  | Rho guanine nucleotide exchange factor (GEF7)          | 2.97 | 1.97 | 0.89 |
| A_52_P274315  | NM_175335 | Gtf2a1     | 83602  | general transcription factor II A, 1                   | 3.08 | 1.97 | 0.72 |
| A_51_P324934  | AK088142  | Mcm3       | 17215  | minichromosome maintenance deficient 3 (S. cerevisiae) | 4.90 | 1.97 | 0.07 |
| A_52_P763938  | NA        | NA         | NA     | NA                                                     | 4.20 | 1.97 | 0.13 |

|              |           |           |        |                                                            |      |      |      |
|--------------|-----------|-----------|--------|------------------------------------------------------------|------|------|------|
| A_52_P543430 | XR_002544 | NA        | NA     | NA                                                         | 3.86 | 1.96 | 0.22 |
| A_51_P292030 | NM_030250 | Nus1      | 52014  | nuclear undecaprenyl pyrophosphate synthase 1 homolo       | 4.15 | 1.96 | 0.15 |
| A_51_P516756 | NM_010434 | Hipk3     | 15259  | homeodomain interacting protein kinase 3                   | 3.43 | 1.96 | 0.40 |
| A_51_P149621 | NM_024222 | Stt3b     | 68292  | STT3, subunit of the oligosaccharyltransferase complex, f  | 3.26 | 1.96 | 0.53 |
| A_51_P326187 | NM_172741 | 4931406P1 | 233103 | RIKEN cDNA 4931406P16 gene                                 | 5.13 | 1.96 | 0.00 |
| A_52_P354844 | AK029268  | Eda2r     | 245527 | ectodysplasin A2 isoform receptor                          | 3.74 | 1.96 | 0.26 |
| A_51_P337755 | NM_026107 | Zkscan6   | 52712  | zinc finger with KRAB and SCAN domains 6                   | 3.36 | 1.96 | 0.46 |
| A_51_P356760 | NM_138315 | Mical1    | 171580 | microtubule associated monooxygenase, calponin and LIM     | 3.27 | 1.96 | 0.53 |
| A_51_P264884 | NM_172277 | Snx8      | 231834 | sorting nexin 8                                            | 6.31 | 1.96 | 0.00 |
| A_52_P419405 | NM_133796 | Arhgdia   | 192662 | Rho GDP dissociation inhibitor (GDI) alpha                 | 9.99 | 1.96 | 0.00 |
| A_52_P609387 | AK044402  | AI848100  | 226551 | expressed sequence AI848100                                | 3.00 | 1.96 | 0.82 |
| A_51_P520310 | NM_007440 | Alox12    | 11684  | arachidonate 12-lipoxygenase                               | 5.09 | 1.96 | 0.00 |
| A_51_P435052 | NM_019793 | Tspan3    | 56434  | tetraspanin 3                                              | 3.75 | 1.96 | 0.26 |
| A_52_P335478 | NM_025882 | Pole4     | 66979  | polymerase (DNA-directed), epsilon 4 (p12 subunit)         | 4.61 | 1.96 | 0.10 |
| A_52_P641892 | NM_021345 | Ptplad1   | 57874  | protein tyrosine phosphatase-like A domain containing 1    | 4.47 | 1.96 | 0.08 |
| A_51_P378677 | NM_001037 | Psg27     | 545925 | pregnancy-specific glycoprotein 27                         | 5.70 | 1.95 | 0.00 |
| A_51_P237668 | NM_009749 | Bex2      | 12069  | brain expressed X-linked 2                                 | 3.89 | 1.95 | 0.21 |
| A_52_P438919 | NM_001011 | Olfr524   | 258055 | olfactory receptor 524                                     | 3.53 | 1.95 | 0.34 |
| A_52_P218765 | NM_198664 | Tbc1d2    | 381605 | TBC1 domain family, member 2                               | 4.12 | 1.95 | 0.14 |
| A_51_P368171 | AK049415  | AU020206  | 101757 | expressed sequence AU020206                                | 3.04 | 1.95 | 0.78 |
| A_52_P195798 | NM_026536 | Atp5s     | 68055  | ATP synthase, H+ transporting, mitochondrial F0 comple     | 4.37 | 1.95 | 0.11 |
| A_52_P407854 | BC093523  | Dda1      | 66498  | DET1 and DDB1 associated 1                                 | 4.23 | 1.95 | 0.13 |
| A_52_P446181 | NM_175163 | Zfp689    | 71131  | zinc finger protein 689                                    | 3.45 | 1.95 | 0.40 |
| A_52_P479099 | NM_009448 | Tuba1c    | 22146  | tubulin, alpha 1C                                          | 5.09 | 1.95 | 0.00 |
| A_52_P444116 | NA        | NA        | NA     | NA                                                         | 3.78 | 1.95 | 0.25 |
| A_51_P443364 | NM_134048 | Cbll1     | 104836 | Casitas B-lineage lymphoma-like 1                          | 3.22 | 1.95 | 0.58 |
| A_52_P305289 | NM_011190 | Psme2     | 19188  | proteasome (prosome, macropain) 28 subunit, beta           | 4.56 | 1.95 | 0.09 |
| A_51_P423039 | NM_145406 | Slc10a3   | 214601 | solute carrier family 10 (sodium/bile acid cotransporter f | 3.90 | 1.95 | 0.21 |
| A_51_P125446 | NM_026963 | Lzic      | 69151  | leucine zipper and CTNNBIP1 domain containing              | 4.02 | 1.95 | 0.18 |
| A_51_P450924 | NM_025882 | Pole4     | 66979  | polymerase (DNA-directed), epsilon 4 (p12 subunit)         | 4.07 | 1.95 | 0.16 |
| A_51_P440707 | NM_025888 | Kctd20    | 66989  | potassium channel tetramerisation domain containing 2C     | 4.22 | 1.95 | 0.13 |
| A_51_P150302 | NM_019465 | Crtam     | 54698  | cytotoxic and regulatory T cell molecule                   | 3.40 | 1.94 | 0.42 |
| A_51_P361535 | NM_011190 | Psme2     | 19188  | proteasome (prosome, macropain) 28 subunit, beta           | 6.00 | 1.94 | 0.00 |
| A_52_P85892  | NM_029502 | Cant1     | 76025  | calcium activated nucleotidase 1                           | 3.93 | 1.94 | 0.19 |

|               |           |            |        |                                                           |      |      |      |
|---------------|-----------|------------|--------|-----------------------------------------------------------|------|------|------|
| A_51_P412947  | NM_007968 | Ewsr1      | 14030  | Ewing sarcoma breakpoint region 1                         | 4.58 | 1.94 | 0.09 |
| A_51_P503261  | NM_133897 | Lrrc8c     | 100604 | leucine rich repeat containing 8 family, member C         | 4.14 | 1.94 | 0.14 |
| A_52_P1077539 | NA        | NA         | NA     | NA                                                        | 3.14 | 1.94 | 0.67 |
| A_52_P555520  | NM_029742 | Klhdc10    | 76788  | kelch domain containing 10                                | 3.26 | 1.94 | 0.53 |
| A_51_P154997  | NM_134155 | Brms1      | 107392 | breast cancer metastasis-suppressor 1                     | 4.30 | 1.94 | 0.11 |
| A_51_P268843  | NM_028544 | Rasip1     | 69903  | Ras interacting protein 1                                 | 3.09 | 1.94 | 0.71 |
| A_52_P636894  | AK081953  | 2010106G01 | 66552  | RIKEN cDNA 2010106G01 gene                                | 4.58 | 1.94 | 0.09 |
| A_51_P289353  | NM_032544 | Gtpbp3     | 70359  | GTP binding protein 3                                     | 3.54 | 1.94 | 0.34 |
| A_51_P321984  | NM_139311 | Mllt6      | 246198 | myeloid/lymphoid or mixed-lineage leukemia (trithorax t   | 3.61 | 1.94 | 0.31 |
| A_52_P389595  | NM_030711 | Erap1      | 80898  | endoplasmic reticulum aminopeptidase 1                    | 3.14 | 1.94 | 0.67 |
| A_52_P16166   | NM_027830 | Mcm9       | 71567  | minichromosome maintenance complex component 9            | 3.48 | 1.94 | 0.37 |
| A_52_P700067  | BG067131  | NA         | NA     | NA                                                        | 3.88 | 1.93 | 0.21 |
| A_52_P60519   | NM_029648 | D19Ertd73  | 76539  | DNA segment, Chr 19, ERATO Doi 737, expressed             | 3.94 | 1.93 | 0.19 |
| A_52_P86176   | NM_011530 | Tap2       | 21355  | transporter 2, ATP-binding cassette, sub-family B (MDR/T  | 3.03 | 1.93 | 0.79 |
| A_52_P132055  | NM_021293 | Cd33       | 12489  | CD33 antigen                                              | 4.55 | 1.93 | 0.09 |
| A_52_P306831  | NM_001002 | Pram1      | 378460 | PML-RAR alpha-regulated adaptor molecule 1                | 3.63 | 1.93 | 0.31 |
| A_52_P282838  | NM_001005 | Spin2      | 278240 | spindlin family, member 2                                 | 3.32 | 1.93 | 0.49 |
| A_51_P169401  | NM_008514 | Lrp6       | 16974  | low density lipoprotein receptor-related protein 6        | 3.02 | 1.93 | 0.79 |
| A_52_P62617   | BB609792  | NA         | NA     | NA                                                        | 4.95 | 1.93 | 0.07 |
| A_52_P289071  | NM_177054 | Casc4      | 319996 | cancer susceptibility candidate 4                         | 3.29 | 1.93 | 0.52 |
| A_52_P168962  | NM_007646 | Cd38       | 12494  | CD38 antigen                                              | 4.18 | 1.93 | 0.12 |
| A_51_P196629  | XM_283903 | Fam102b    | 329739 | family with sequence similarity 102, member B             | 3.39 | 1.93 | 0.44 |
| A_52_P676913  | NM_010817 | Psmc7      | 17463  | proteasome (prosome, macropain) 26S subunit, non-ATP      | 3.39 | 1.93 | 0.44 |
| A_51_P318551  | NM_145431 | Nle1       | 217011 | notchless homolog 1 (Drosophila)                          | 3.96 | 1.93 | 0.17 |
| A_52_P673978  | AK043361  | Glce       | 93683  | glucuronyl C5-epimerase                                   | 5.54 | 1.93 | 0.00 |
| A_52_P291723  | NM_177923 | H2-M10.2   | 333715 | histocompatibility 2, M region locus 10.2                 | 3.64 | 1.93 | 0.31 |
| A_52_P140546  | NM_025772 | Dtnbp1     | 94245  | dystrobrevin binding protein 1                            | 3.61 | 1.92 | 0.31 |
| A_52_P39756   | NM_001015 | Rap1gap2   | 380711 | RAP1 GTPase activating protein 2                          | 3.26 | 1.92 | 0.53 |
| A_52_P517730  | NM_009952 | Creb1      | 12912  | cAMP responsive element binding protein 1                 | 3.60 | 1.92 | 0.32 |
| A_51_P160514  | NM_021328 | Bin3       | 57784  | bridging integrator 3                                     | 3.48 | 1.92 | 0.39 |
| A_52_P512847  | NM_010589 | Jak3       | 16453  | Janus kinase 3                                            | 4.07 | 1.92 | 0.16 |
| A_51_P137419  | NM_009977 | Cst7       | 13011  | cystatin F (leukocystatin)                                | 4.08 | 1.92 | 0.16 |
| A_52_P391066  | AK010836  | Ppp1r12c   | 232807 | protein phosphatase 1, regulatory (inhibitor) subunit 12C | 4.17 | 1.92 | 0.12 |
| A_52_P273929  | NM_025301 | Mrpl17     | 27397  | mitochondrial ribosomal protein L17                       | 6.30 | 1.91 | 0.00 |

|              |           |           |        |                                                     |      |      |      |
|--------------|-----------|-----------|--------|-----------------------------------------------------|------|------|------|
| A_51_P142465 | NM_011239 | Ranbp1    | 19385  | RAN binding protein 1                               | 3.93 | 1.91 | 0.19 |
| A_51_P405135 | XM_896646 | NA        | NA     | NA                                                  | 3.03 | 1.91 | 0.79 |
| A_52_P271    | NM_029669 | Dnajc18   | 76594  | Dnaj (Hsp40) homolog, subfamily C, member 18        | 3.48 | 1.91 | 0.37 |
| A_52_P479599 | NM_010438 | Hk1       | 15275  | hexokinase 1                                        | 3.09 | 1.91 | 0.71 |
| A_52_P569178 | AK030115  | Sf3a1     | 67465  | splicing factor 3a, subunit 1                       | 3.43 | 1.91 | 0.40 |
| A_51_P461138 | NM_016861 | Pdlim1    | 54132  | PDZ and LIM domain 1 (elfin)                        | 4.03 | 1.91 | 0.16 |
| A_51_P341717 | AF251703  | Cd300lf   | 246746 | CD300 antigen like family member F                  | 5.33 | 1.91 | 0.00 |
| A_51_P152404 | NM_026166 | Ikbip     | 67454  | IKBKB interacting protein                           | 3.45 | 1.91 | 0.40 |
| A_52_P341449 | NM_028352 | Pgm3      | 109785 | phosphoglucomutase 3                                | 4.88 | 1.91 | 0.07 |
| A_51_P473498 | NM_173398 | Gpr171    | 229323 | G protein-coupled receptor 171                      | 4.73 | 1.91 | 0.06 |
| A_51_P433237 | NM_007665 | Cdh3      | 12560  | cadherin 3                                          | 3.40 | 1.91 | 0.43 |
| A_51_P515768 | AK033091  | Pdlim7    | 67399  | PDZ and LIM domain 7                                | 3.63 | 1.91 | 0.31 |
| A_52_P537140 | AK047235  | Zdhhc24   | 70605  | zinc finger, DHHC domain containing 24              | 2.94 | 1.90 | 0.93 |
| A_51_P402909 | NM_010877 | Ncf2      | 17970  | neutrophil cytosolic factor 2                       | 3.34 | 1.90 | 0.48 |
| A_51_P431554 | BC027639  | 2310004N2 | 69535  | RIKEN cDNA 2310004N24 gene                          | 6.38 | 1.90 | 0.00 |
| A_52_P209311 | AK170992  | Snx12     | 55988  | sorting nexin 12                                    | 2.93 | 1.90 | 0.95 |
| A_51_P173622 | NM_011202 | Ptpn11    | 19247  | protein tyrosine phosphatase, non-receptor type 11  | 3.42 | 1.90 | 0.42 |
| A_51_P515623 | NM_026111 | Qpctl     | 67369  | glutaminy-peptide cyclotransferase-like             | 3.83 | 1.90 | 0.23 |
| A_52_P281679 | AK004214  | Gmeb1     | 56809  | glucocorticoid modulatory element binding protein 1 | 3.02 | 1.90 | 0.79 |
| A_52_P112721 | NM_178599 | Commd8    | 27784  | COMM domain containing 8                            | 3.15 | 1.90 | 0.66 |
| A_52_P550843 | NM_024282 | Pppde1    | 78825  | PPPDE peptidase domain containing 1                 | 3.28 | 1.90 | 0.53 |
| A_51_P514584 | NM_001017 | Tbata     | 65971  | thymus, brain and testes associated                 | 3.48 | 1.90 | 0.37 |
| A_51_P479434 | AK042393  | Rfc3      | 69263  | replication factor C (activator 1) 3                | 3.03 | 1.90 | 0.79 |
| A_52_P488612 | AK029907  | Btbd9     | 224671 | BTB (POZ) domain containing 9                       | 3.91 | 1.90 | 0.21 |
| A_51_P176661 | NM_175286 | C430004E1 | 97031  | RIKEN cDNA C430004E15 gene                          | 3.24 | 1.90 | 0.56 |
| A_51_P472241 | NM_013717 | B9d1      | 27078  | B9 protein domain 1                                 | 2.96 | 1.89 | 0.91 |
| A_52_P211393 | BC059278  | Ptpn11    | 19247  | protein tyrosine phosphatase, non-receptor type 11  | 3.70 | 1.89 | 0.27 |
| A_52_P559034 | AK052765  | Klhdc5    | 232539 | kelch domain containing 5                           | 5.01 | 1.89 | 0.08 |
| A_51_P367100 | NM_008407 | Itih3     | 16426  | inter-alpha trypsin inhibitor, heavy chain 3        | 6.97 | 1.89 | 0.00 |
| A_52_P612682 | NM_145956 | Brcc3     | 210766 | BRCA1/BRCA2-containing complex, subunit 3           | 2.98 | 1.89 | 0.89 |
| A_52_P412543 | NM_172502 | Dcaf15    | 212123 | DDB1 and CUL4 associated factor 15                  | 5.43 | 1.89 | 0.00 |
| A_52_P566348 | NM_010937 | Nras      | 18176  | neuroblastoma ras oncogene                          | 5.65 | 1.89 | 0.00 |
| A_51_P499441 | NM_178900 | Prkd2     | 101540 | protein kinase D2                                   | 7.26 | 1.89 | 0.00 |
| A_52_P469939 | NM_027375 | Gcc2      | 70297  | GRIP and coiled-coil domain containing 2            | 3.39 | 1.89 | 0.44 |

|              |           |                |        |                                                                     |      |      |      |
|--------------|-----------|----------------|--------|---------------------------------------------------------------------|------|------|------|
| A_52_P582000 | NA        | NA             | NA     | NA                                                                  | 3.16 | 1.88 | 0.65 |
| A_51_P331215 | AK034732  | Prmt6          | 99890  | protein arginine N-methyltransferase 6                              | 3.76 | 1.88 | 0.25 |
| A_51_P484679 | AK080946  | Synj1          | 104015 | synaptojanin 1                                                      | 4.52 | 1.88 | 0.09 |
| A_52_P628455 | NM_007968 | Ewsr1          | 14030  | Ewing sarcoma breakpoint region 1                                   | 3.30 | 1.88 | 0.50 |
| A_51_P446678 | NM_018736 | Mre11a         | 17535  | meiotic recombination 11 homolog A ( <i>S. cerevisiae</i> )         | 2.94 | 1.88 | 0.93 |
| A_52_P336859 | AK088462  | Hnrnpk         | 15387  | heterogeneous nuclear ribonucleoprotein K                           | 4.01 | 1.88 | 0.18 |
| A_51_P467990 | NM_026602 | Bcas2          | 68183  | breast carcinoma amplified sequence 2                               | 3.60 | 1.88 | 0.32 |
| A_51_P324351 | NM_013900 | Mfi2           | 30060  | antigen p97 (melanoma associated) identified by monoclonal antibody | 3.52 | 1.88 | 0.35 |
| A_51_P174854 | NM_019791 | Maged1         | 94275  | melanoma antigen, family D, 1                                       | 3.51 | 1.88 | 0.36 |
| A_52_P135175 | NM_025480 | Tmem128        | 66309  | transmembrane protein 128                                           | 3.47 | 1.88 | 0.38 |
| A_52_P62085  | NM_022325 | Ctsz           | 64138  | cathepsin Z                                                         | 5.35 | 1.88 | 0.00 |
| A_51_P307864 | NM_026208 | 1700019N167507 | 167507 | RIKEN cDNA 1700019N19 gene                                          | 3.23 | 1.88 | 0.58 |
| A_52_P106537 | NM_053068 | Chrac1         | 93696  | chromatin accessibility complex 1                                   | 4.97 | 1.88 | 0.07 |
| A_52_P584570 | NA        | NA             | NA     | NA                                                                  | 2.94 | 1.88 | 0.93 |
| A_51_P180825 | NM_008707 | Nmt1           | 18107  | N-myristoyltransferase 1                                            | 3.90 | 1.88 | 0.21 |
| A_52_P495139 | NM_025635 | Zwint          | 52696  | ZW10 interactor                                                     | 3.31 | 1.88 | 0.49 |
| A_52_P217986 | NM_030138 | Acap2          | 78618  | ArfGAP with coiled-coil, ankyrin repeat and PH domains 2            | 5.22 | 1.88 | 0.00 |
| A_51_P253204 | NM_028805 | Katnb1         | 74187  | katanin p80 (WD40-containing) subunit B 1                           | 5.31 | 1.88 | 0.00 |
| A_51_P500760 | XM_994514 | Eid2b          | 434156 | EP300 interacting inhibitor of differentiation 2B                   | 3.60 | 1.88 | 0.32 |
| A_51_P302576 | NM_009259 | Spn            | 20737  | sialophorin                                                         | 6.39 | 1.88 | 0.00 |
| A_52_P859659 | AK051538  | NA             | NA     | NA                                                                  | 3.83 | 1.88 | 0.23 |
| A_52_P370560 | NM_011690 | Vars           | 22321  | valyl-tRNA synthetase                                               | 3.19 | 1.87 | 0.62 |
| A_51_P242967 | NM_021308 | Piwil2         | 57746  | piwi-like homolog 2 ( <i>Drosophila</i> )                           | 5.56 | 1.87 | 0.00 |
| A_52_P369769 | AK170314  | Nrg1           | 211323 | neuregulin 1                                                        | 2.96 | 1.87 | 0.91 |
| A_51_P402908 | NA        | NA             | NA     | NA                                                                  | 3.67 | 1.87 | 0.29 |
| A_51_P114577 | AK161172  | Parm1          | 231440 | prostate androgen-regulated mucin-like protein 1                    | 3.10 | 1.87 | 0.70 |
| A_51_P101929 | NM_010705 | Lgals3         | 16854  | lectin, galactose binding, soluble 3                                | 3.06 | 1.87 | 0.76 |
| A_52_P308681 | NM_029705 | Atxn3          | 110616 | ataxin 3                                                            | 4.58 | 1.87 | 0.09 |
| A_51_P323221 | NM_175306 | Phactr4        | 100169 | phosphatase and actin regulator 4                                   | 5.70 | 1.87 | 0.00 |
| A_52_P499206 | NM_013763 | Tbl2           | 27368  | transducin (beta)-like 2                                            | 4.84 | 1.87 | 0.06 |
| A_52_P17115  | NM_133206 | Znrf1          | 170737 | zinc and ring finger 1                                              | 2.91 | 1.87 | 0.98 |
| A_51_P108779 | NM_023131 | Rce1           | 19671  | RCE1 homolog, prenyl protein peptidase ( <i>S. cerevisiae</i> )     | 2.97 | 1.87 | 0.89 |
| A_52_P304128 | NM_008608 | Mmp14          | 17387  | matrix metalloproteinase 14 (membrane-inserted)                     | 3.72 | 1.87 | 0.27 |
| A_51_P486239 | NM_011606 | Clec3b         | 21922  | C-type lectin domain family 3, member b                             | 4.82 | 1.87 | 0.06 |

|              |           |            |        |                                                            |      |      |      |
|--------------|-----------|------------|--------|------------------------------------------------------------|------|------|------|
| A_51_P192429 | NM_021343 | Spata5     | 57815  | spermatogenesis associated 5                               | 3.62 | 1.87 | 0.31 |
| A_51_P249494 | NM_016807 | Sdcbp      | 53378  | syndecan binding protein                                   | 3.72 | 1.87 | 0.27 |
| A_52_P641185 | NM_011202 | Ptpn11     | 19247  | protein tyrosine phosphatase, non-receptor type 11         | 3.09 | 1.87 | 0.71 |
| A_52_P349738 | NM_024173 | Atp6v1g1   | 66290  | ATPase, H+ transporting, lysosomal V1 subunit G1           | 3.40 | 1.87 | 0.42 |
| A_52_P197731 | NM_001025 | 2700007P2  | 212772 | RIKEN cDNA 2700007P21 gene                                 | 3.60 | 1.87 | 0.32 |
| A_51_P131358 | NM_009151 | Selplg     | 20345  | selectin, platelet (p-selectin) ligand                     | 2.91 | 1.87 | 0.99 |
| A_51_P142089 | NM_016920 | Atp6v0a1   | 11975  | ATPase, H+ transporting, lysosomal V0 subunit A1           | 3.84 | 1.87 | 0.22 |
| A_52_P310140 | NM_021539 | Wsb2       | 59043  | WD repeat and SOCS box-containing 2                        | 3.03 | 1.86 | 0.79 |
| A_52_P355014 | NM_025875 | Rbm8a      | 60365  | RNA binding motif protein 8a                               | 3.89 | 1.86 | 0.21 |
| A_51_P430357 | NM_022993 | Lrp10      | 65107  | low-density lipoprotein receptor-related protein 10        | 3.58 | 1.86 | 0.33 |
| A_51_P514623 | NM_025422 | Cd302      | 66205  | CD302 antigen                                              | 6.10 | 1.86 | 0.00 |
| A_52_P223495 | NM_010576 | Itga4      | 16401  | integrin alpha 4                                           | 5.88 | 1.86 | 0.00 |
| A_52_P57526  | BC021160  | Sin3b      | 20467  | transcriptional regulator, SIN3B (yeast)                   | 4.05 | 1.86 | 0.16 |
| A_51_P293516 | NM_019636 | Tbc1d1     | 57915  | TBC1 domain family, member 1                               | 4.03 | 1.86 | 0.16 |
| A_51_P455776 | NM_026177 | 1200011118 | 67467  | RIKEN cDNA 1200011118 gene                                 | 2.92 | 1.86 | 0.96 |
| A_51_P219433 | NM_138596 | Med10      | 28077  | mediator of RNA polymerase II transcription, subunit 10 I  | 4.52 | 1.86 | 0.09 |
| A_51_P371152 | XM_127051 | Sos2       | 20663  | son of sevenless homolog 2 (Drosophila)                    | 3.22 | 1.86 | 0.58 |
| A_51_P173022 | NM_026330 | Nsmce1     | 67711  | non-SMC element 1 homolog (S. cerevisiae)                  | 3.00 | 1.86 | 0.85 |
| A_51_P261059 | NM_153507 | Cpne2      | 234577 | copine II                                                  | 3.28 | 1.86 | 0.53 |
| A_51_P272172 | NM_053068 | Chrac1     | 93696  | chromatin accessibility complex 1                          | 5.13 | 1.86 | 0.00 |
| A_52_P199446 | XM_974928 | NA         | NA     | NA                                                         | 4.81 | 1.86 | 0.06 |
| A_51_P433562 | NM_138314 | Nme7       | 171567 | non-metastatic cells 7, protein expressed in (nucleoside-c | 3.49 | 1.86 | 0.38 |
| A_52_P104961 | NA        | NA         | NA     | NA                                                         | 3.10 | 1.85 | 0.70 |
| A_51_P346453 | NM_153570 | Noc4l      | 100608 | nucleolar complex associated 4 homolog (S. cerevisiae)     | 3.06 | 1.85 | 0.76 |
| A_51_P408729 | NM_016966 | Phgdh      | 236539 | 3-phosphoglycerate dehydrogenase                           | 2.90 | 1.85 | 0.99 |
| A_52_P506271 | NM_153582 | Cmtm4      | 97487  | CKLF-like MARVEL transmembrane domain containing 4         | 4.54 | 1.85 | 0.09 |
| A_51_P449935 | NM_025310 | Ftsj3      | 56095  | FtsJ homolog 3 (E. coli)                                   | 2.89 | 1.85 | 1.02 |
| A_52_P147816 | NM_029413 | Morc4      | 75746  | microrchidia 4                                             | 3.85 | 1.85 | 0.22 |
| A_52_P716675 | NA        | NA         | NA     | NA                                                         | 4.01 | 1.85 | 0.18 |
| A_51_P416974 | NM_016768 | Pbx3       | 18516  | pre B-cell leukemia transcription factor 3                 | 3.62 | 1.85 | 0.31 |
| A_51_P264064 | NM_016692 | Incenp     | 16319  | inner centromere protein                                   | 3.39 | 1.85 | 0.44 |
| A_51_P224023 | NM_144846 | Fam49b     | 223601 | family with sequence similarity 49, member B               | 4.00 | 1.85 | 0.18 |
| A_51_P145541 | NM_020296 | Rbms1      | 56878  | RNA binding motif, single stranded interacting protein 1   | 3.00 | 1.85 | 0.85 |
| A_51_P267194 | NM_011810 | Faim       | 23873  | Fas apoptotic inhibitory molecule                          | 3.44 | 1.85 | 0.40 |

|              |           |           |        |                                                            |      |      |      |
|--------------|-----------|-----------|--------|------------------------------------------------------------|------|------|------|
| A_52_P397944 | XM_146900 | NA        | NA     | NA                                                         | 3.03 | 1.85 | 0.79 |
| A_51_P117666 | BC055707  | 1810032O  | 66293  | RIKEN cDNA 1810032O08 gene                                 | 2.94 | 1.85 | 0.93 |
| A_51_P126302 | NM_173376 | Rbmx2     | 209003 | RNA binding motif protein, X-linked 2                      | 3.36 | 1.85 | 0.46 |
| A_51_P515348 | NM_133757 | Pgs1      | 74451  | phosphatidylglycerophosphate synthase 1                    | 2.95 | 1.84 | 0.92 |
| A_52_P251703 | D28599    | Vcan      | 13003  | versican                                                   | 5.56 | 1.84 | 0.00 |
| A_52_P243152 | NM_026866 | Disp1     | 68897  | dispatched homolog 1 (Drosophila)                          | 3.66 | 1.84 | 0.28 |
| A_52_P194929 | XM_109726 | NA        | NA     | NA                                                         | 3.27 | 1.84 | 0.53 |
| A_52_P422172 | NM_011932 | Dapp1     | 26377  | dual adaptor for phosphotyrosine and 3-phosphoinositid     | 5.34 | 1.84 | 0.00 |
| A_52_P683572 | NM_021539 | Wsb2      | 59043  | WD repeat and SOCS box-containing 2                        | 3.07 | 1.84 | 0.74 |
| A_52_P338816 | AK164710  | Zufsp     | 72580  | zinc finger with UFM1-specific peptidase domain            | 3.73 | 1.84 | 0.26 |
| A_51_P327121 | NM_009515 | Was       | 22376  | Wiskott-Aldrich syndrome homolog (human)                   | 3.72 | 1.84 | 0.27 |
| A_51_P444565 | NA        | NA        | NA     | NA                                                         | 5.00 | 1.84 | 0.08 |
| A_51_P328963 | NM_011672 | Ufd1l     | 22230  | ubiquitin fusion degradation 1 like                        | 4.63 | 1.84 | 0.05 |
| A_52_P57359  | NM_013835 | Trove2    | 20822  | TROVE domain family, member 2                              | 3.08 | 1.84 | 0.71 |
| A_52_P268549 | NM_197981 | 593041611 | 72440  | RIKEN cDNA 5930416119 gene                                 | 4.25 | 1.84 | 0.13 |
| A_51_P257960 | NM_011967 | Psma5     | 26442  | proteasome (prosome, macropain) subunit, alpha type 5      | 3.58 | 1.84 | 0.33 |
| A_52_P628521 | AK045264  | B130052P1 | 105442 | RIKEN cDNA B130052P14 gene                                 | 3.58 | 1.84 | 0.33 |
| A_52_P261322 | NM_198294 | Tanc1     | 66860  | tetratricopeptide repeat, ankyrin repeat and coiled-coil c | 3.04 | 1.84 | 0.79 |
| A_52_P530958 | NM_027353 | Cd2bp2    | 70233  | CD2 antigen (cytoplasmic tail) binding protein 2           | 3.47 | 1.84 | 0.39 |
| A_51_P294113 | AK032988  | Chd2      | 244059 | chromodomain helicase DNA binding protein 2                | 3.20 | 1.84 | 0.59 |
| A_52_P470916 | AK161656  | Taf1d     | 75316  | TATA box binding protein (Tbp)-associated factor, RNA p    | 2.93 | 1.83 | 0.95 |
| A_52_P375156 | NM_020270 | Scamp5    | 56807  | secretory carrier membrane protein 5                       | 3.59 | 1.83 | 0.32 |
| A_52_P307938 | NM_001077 | Pik3r1    | 18708  | phosphatidylinositol 3-kinase, regulatory subunit, polype  | 3.12 | 1.83 | 0.70 |
| A_51_P237754 | NM_010398 | H2-T23    | 15040  | histocompatibility 2, T region locus 23                    | 6.65 | 1.83 | 0.00 |
| A_52_P536947 | NM_133769 | Cyfp2     | 76884  | cytoplasmic FMR1 interacting protein 2                     | 3.88 | 1.83 | 0.21 |
| A_51_P192501 | NM_026240 | Gramd3    | 107022 | GRAM domain containing 3                                   | 3.01 | 1.83 | 0.82 |
| A_52_P215469 | NM_133942 | Plekha1   | 101476 | pleckstrin homology domain containing, family A (phosph    | 3.82 | 1.83 | 0.24 |
| A_52_P384822 | AK129235  | Taok2     | 381921 | TAO kinase 2                                               | 3.23 | 1.83 | 0.56 |
| A_52_P488471 | NM_008019 | Fkbp1a    | 14225  | FK506 binding protein 1a                                   | 4.04 | 1.83 | 0.16 |
| A_51_P483324 | NM_008979 | Ptpn22    | 19260  | protein tyrosine phosphatase, non-receptor type 22 (lym    | 5.05 | 1.83 | 0.08 |
| A_51_P103000 | NM_008851 | Pitpnm1   | 18739  | phosphatidylinositol transfer protein, membrane-associa    | 4.33 | 1.83 | 0.11 |
| A_51_P433615 | NM_183390 | Klhl6     | 239743 | kelch-like 6 (Drosophila)                                  | 4.62 | 1.83 | 0.05 |
| A_51_P261379 | NM_139140 | Spats2    | 72572  | spermatogenesis associated, serine-rich 2                  | 3.13 | 1.83 | 0.68 |
| A_51_P454797 | NM_025534 | Ccdc82    | 66396  | coiled-coil domain containing 82                           | 4.70 | 1.83 | 0.05 |



|               |           |           |        |                                                                 |      |      |      |
|---------------|-----------|-----------|--------|-----------------------------------------------------------------|------|------|------|
| A_51_P278489  | NM_133927 | ltfg2     | 101142 | integrin alpha FG-GAP repeat containing 2                       | 3.61 | 1.83 | 0.31 |
| A_51_P200027  | NM_026148 | Lims1     | 110829 | LIM and senescent cell antigen-like domains 1                   | 5.65 | 1.83 | 0.00 |
| A_52_P563617  | NM_133772 | Ssbp4     | 76900  | single stranded DNA binding protein 4                           | 3.23 | 1.82 | 0.58 |
| A_52_P636050  | NM_025663 | Gpatch4   | 66614  | G patch domain containing 4                                     | 3.45 | 1.82 | 0.40 |
| A_51_P108778  | NM_023131 | Rce1      | 19671  | RCE1 homolog, prenyl protein peptidase ( <i>S. cerevisiae</i> ) | 3.26 | 1.82 | 0.53 |
| A_51_P426943  | NM_018855 | Gas8      | 104346 | growth arrest specific 8                                        | 4.66 | 1.82 | 0.05 |
| A_51_P181205  | NM_029418 | 9130401M1 | 75758  | RIKEN cDNA 9130401M01 gene                                      | 5.69 | 1.82 | 0.00 |
| A_52_P354271  | NM_026655 | 2310057M  | 68277  | RIKEN cDNA 2310057M21 gene                                      | 3.10 | 1.82 | 0.70 |
| A_51_P199057  | NM_029749 | Usp42     | 76800  | ubiquitin specific peptidase 42                                 | 4.49 | 1.82 | 0.09 |
| A_51_P370630  | NM_026689 | Mul1      | 68350  | mitochondrial ubiquitin ligase activator of NFKB 1              | 3.30 | 1.82 | 0.52 |
| A_52_P107424  | NM_010731 | Zbtb7a    | 16969  | zinc finger and BTB domain containing 7a                        | 3.69 | 1.82 | 0.29 |
| A_52_P1126526 | NM_175294 | Nucks1    | 98415  | nuclear casein kinase and cyclin-dependent kinase substr        | 3.35 | 1.82 | 0.47 |
| A_52_P292708  | NM_019437 | Rfk       | 54391  | riboflavin kinase                                               | 5.08 | 1.82 | 0.00 |
| A_52_P163766  | NM_011596 | Atp6v0a2  | 21871  | ATPase, H <sup>+</sup> transporting, lysosomal V0 subunit A2    | 4.79 | 1.81 | 0.06 |
| A_52_P558357  | NM_001033 | Dcp1b     | 319618 | DCP1 decapping enzyme homolog b ( <i>S. cerevisiae</i> )        | 4.27 | 1.81 | 0.10 |
| A_52_P274960  | NM_001005 | Arhgap30  | 226652 | Rho GTPase activating protein 30                                | 3.27 | 1.81 | 0.53 |
| A_51_P259378  | NM_030743 | Rnf114    | 81018  | ring finger protein 114                                         | 2.92 | 1.81 | 0.98 |
| A_52_P267275  | AK018401  | Alpk1     | 71481  | alpha-kinase 1                                                  | 3.50 | 1.81 | 0.36 |
| A_52_P579258  | NA        | NA        | NA     | NA                                                              | 4.39 | 1.81 | 0.12 |
| A_52_P564908  | AK013903  | NA        | NA     | NA                                                              | 3.74 | 1.81 | 0.26 |
| A_52_P630493  | NM_001037 | Dnajb6    | 23950  | Dnaj (Hsp40) homolog, subfamily B, member 6                     | 3.19 | 1.81 | 0.60 |
| A_52_P38317   | AK046153  | Naa20     | 67877  | N(alpha)-acetyltransferase 20, NatB catalytic subunit           | 4.98 | 1.81 | 0.08 |
| A_52_P8903    | NM_177140 | D230037D  | 320351 | RIKEN cDNA D230037D09 gene                                      | 3.10 | 1.81 | 0.70 |
| A_52_P149163  | AK146784  | Mark4     | 232944 | MAP/microtubule affinity-regulating kinase 4                    | 3.27 | 1.81 | 0.53 |
| A_51_P133381  | NM_026797 | Dbn1d2    | 52840  | dysbindin (dystrobrevin binding protein 1) domain contai        | 3.85 | 1.81 | 0.22 |
| A_52_P135282  | NM_212447 | Marveld3  | 73608  | MARVEL (membrane-associating) domain containing 3               | 4.09 | 1.81 | 0.16 |
| A_51_P201346  | NM_010786 | Mdm2      | 17246  | transformed mouse 3T3 cell double minute 2                      | 2.99 | 1.81 | 0.85 |
| A_51_P517105  | NM_012054 | Aoah      | 27052  | acyloxyacyl hydrolase                                           | 3.45 | 1.80 | 0.40 |
| A_51_P230142  | NM_026634 | A930018P2 | 68243  | RIKEN cDNA A930018P22 gene                                      | 5.01 | 1.80 | 0.08 |
| A_51_P491011  | NM_001033 | Pgap3     | 320655 | post-GPI attachment to proteins 3                               | 3.92 | 1.80 | 0.19 |
| A_52_P411430  | XM_622446 | Gm5914    | 546100 | predicted gene 5914                                             | 3.12 | 1.80 | 0.70 |
| A_52_P434820  | NM_001038 | Gnpda2    | 67980  | glucosamine-6-phosphate deaminase 2                             | 4.12 | 1.80 | 0.14 |
| A_52_P284162  | NM_009456 | Ube2l3    | 22195  | ubiquitin-conjugating enzyme E2L 3                              | 4.46 | 1.80 | 0.08 |
| A_51_P484983  | NM_023224 | Cblc      | 80794  | Casitas B-lineage lymphoma c                                    | 4.89 | 1.80 | 0.07 |

|               |           |            |        |                                                                                |      |      |      |
|---------------|-----------|------------|--------|--------------------------------------------------------------------------------|------|------|------|
| A_52_P112110  | NM_145987 | Tmem82     | 213989 | transmembrane protein 82                                                       | 3.19 | 1.80 | 0.60 |
| A_52_P1061446 | XM_885873 | Baz1a      | 217578 | bromodomain adjacent to zinc finger domain 1A                                  | 3.02 | 1.80 | 0.79 |
| A_51_P274789  | NM_030690 | Rai14      | 75646  | retinoic acid induced 14                                                       | 4.32 | 1.80 | 0.11 |
| A_51_P192817  | NM_026816 | Gtf2f2     | 68705  | general transcription factor IIF, polypeptide 2                                | 3.32 | 1.80 | 0.49 |
| A_51_P349691  | NM_133979 | Ano10      | 102566 | anoctamin 10                                                                   | 3.71 | 1.80 | 0.28 |
| A_52_P228247  | NM_010282 | Ggps1      | 14593  | geranylgeranyl diphosphate synthase 1                                          | 3.51 | 1.80 | 0.36 |
| A_52_P636482  | NM_182650 | Hnrnpa2b1  | 53379  | heterogeneous nuclear ribonucleoprotein A2/B1                                  | 3.24 | 1.79 | 0.56 |
| A_51_P440107  | NM_026968 | Manbal     | 69161  | mannosidase, beta A, lysosomal-like                                            | 3.87 | 1.79 | 0.20 |
| A_51_P333060  | NM_148948 | Dicer1     | 192119 | Dicer1, Dcr-1 homolog (Drosophila)                                             | 3.06 | 1.79 | 0.75 |
| A_51_P123077  | NM_011955 | Nubp1      | 26425  | nucleotide binding protein 1                                                   | 4.19 | 1.79 | 0.12 |
| A_52_P495031  | NM_029418 | 9130401M01 | 75758  | RIKEN cDNA 9130401M01 gene                                                     | 4.66 | 1.79 | 0.05 |
| A_51_P190277  | NM_053074 | Nup62      | 18226  | nucleoporin 62                                                                 | 3.23 | 1.79 | 0.58 |
| A_52_P249385  | NM_025830 | Wwp2       | 66894  | WW domain containing E3 ubiquitin protein ligase 2                             | 3.06 | 1.79 | 0.76 |
| A_52_P594768  | NM_009698 | Aprt       | 11821  | adenine phosphoribosyl transferase                                             | 3.62 | 1.79 | 0.31 |
| A_51_P296036  | NM_144847 | Nrbp2      | 223649 | nuclear receptor binding protein 2                                             | 3.32 | 1.79 | 0.49 |
| A_52_P542140  | AK005617  | Fam192a    | 102122 | family with sequence similarity 192, member A                                  | 3.60 | 1.79 | 0.32 |
| A_51_P110576  | NM_011175 | Lgmn       | 19141  | legumain                                                                       | 3.37 | 1.79 | 0.45 |
| A_52_P283910  | AK011143  | Hnrpdl     | 50926  | heterogeneous nuclear ribonucleoprotein D-like                                 | 2.97 | 1.79 | 0.89 |
| A_52_P580974  | NM_130863 | Adrbk1     | 110355 | adrenergic receptor kinase, beta 1                                             | 3.39 | 1.79 | 0.44 |
| A_51_P203501  | NM_011690 | Vars       | 22321  | valyl-tRNA synthetase                                                          | 3.75 | 1.79 | 0.26 |
| A_51_P430766  | NM_010548 | Il10       | 16153  | interleukin 10                                                                 | 3.14 | 1.79 | 0.67 |
| A_52_P609153  | NM_144905 | 6330416G13 | 230279 | RIKEN cDNA 6330416G13 gene                                                     | 2.95 | 1.79 | 0.93 |
| A_52_P18559   | BC019206  | Sbno2      | 216161 | strawberry notch homolog 2 (Drosophila)                                        | 3.61 | 1.79 | 0.31 |
| A_51_P487869  | NM_024442 | Cyp4f16    | 70101  | cytochrome P450, family 4, subfamily f, polypeptide 16                         | 4.80 | 1.79 | 0.06 |
| A_51_P151902  | NM_145584 | Spon1      | 233744 | spondin 1, (f-spondin) extracellular matrix protein                            | 3.99 | 1.78 | 0.18 |
| A_52_P1114640 | AK010368  | 2410003L1  | 69729  | RIKEN cDNA 2410003L11 gene                                                     | 3.32 | 1.78 | 0.49 |
| A_52_P382876  | NM_177692 | Bloc1s3    | 232946 | biogenesis of lysosome-related organelles complex-1, subunit 3                 | 3.31 | 1.78 | 0.49 |
| A_51_P124719  | NM_001025 | Ccdc93     | 70829  | coiled-coil domain containing 93                                               | 3.44 | 1.78 | 0.40 |
| A_51_P115940  | NM_172787 | L3mbtl3    | 237339 | l(3)mbt-like 3 (Drosophila)                                                    | 3.13 | 1.78 | 0.68 |
| A_52_P245648  | NM_008577 | Slc3a2     | 17254  | solute carrier family 3 (activators of dibasic and neutral amino acids)        | 3.81 | 1.78 | 0.24 |
| A_51_P113527  | NM_144958 | Eif4a1     | 13681  | eukaryotic translation initiation factor 4A1                                   | 3.24 | 1.78 | 0.56 |
| A_51_P354572  | NM_198163 | Rab35      | 77407  | RAB35, member RAS oncogene family                                              | 3.03 | 1.78 | 0.79 |
| A_52_P464629  | NM_138314 | Nme7       | 171567 | non-metastatic cells 7, protein expressed in (nucleoside-diphosphate kinase 7) | 3.68 | 1.78 | 0.29 |
| A_52_P491544  | NM_017464 | Nedd9      | 18003  | neural precursor cell expressed, developmentally down-regulated 9              | 4.17 | 1.78 | 0.12 |

|               |           |                |        |                                                              |      |      |      |
|---------------|-----------|----------------|--------|--------------------------------------------------------------|------|------|------|
| A_51_P108226  | NM_183249 | 1100001G266107 |        | RIKEN cDNA 1100001G20 gene                                   | 3.89 | 1.78 | 0.21 |
| A_51_P330428  | NM_007918 | Eif4ebp1       | 13685  | eukaryotic translation initiation factor 4E binding protein  | 4.09 | 1.77 | 0.17 |
| A_51_P491437  | NM_172618 | Btbd9          | 224671 | BTB (POZ) domain containing 9                                | 3.53 | 1.77 | 0.34 |
| A_52_P1184000 | NM_175294 | Nucks1         | 98415  | nuclear casein kinase and cyclin-dependent kinase substr     | 5.58 | 1.77 | 0.00 |
| A_52_P558411  | NM_010833 | Msn            | 17698  | moesin                                                       | 3.32 | 1.77 | 0.49 |
| A_51_P301394  | NM_008179 | Gspt2          | 14853  | G1 to S phase transition 2                                   | 3.94 | 1.77 | 0.19 |
| A_51_P436839  | NM_017405 | Lsr            | 54135  | lipolysis stimulated lipoprotein receptor                    | 4.23 | 1.77 | 0.13 |
| A_51_P397296  | NM_028584 | Marveld3       | 73608  | MARVEL (membrane-associating) domain containing 3            | 2.95 | 1.77 | 0.93 |
| A_51_P336874  | NM_025272 | Atp6v0e        | 11974  | ATPase, H+ transporting, lysosomal V0 subunit E              | 4.71 | 1.77 | 0.06 |
| A_51_P267544  | NM_013522 | Frg1           | 14300  | FSHD region gene 1                                           | 4.06 | 1.77 | 0.16 |
| A_51_P367772  | NM_026157 | Mtpap          | 67440  | mitochondrial poly(A) polymerase                             | 3.28 | 1.77 | 0.53 |
| A_52_P418724  | NM_001039 | Morf4l1        | 21761  | mortality factor 4 like 1                                    | 3.14 | 1.77 | 0.67 |
| A_52_P299974  | NM_010233 | Fn1            | 14268  | fibronectin 1                                                | 5.97 | 1.77 | 0.00 |
| A_52_P275354  | XM_895142 | NA             | NA     | NA                                                           | 4.14 | 1.77 | 0.14 |
| A_51_P496491  | NM_028031 | Zdhhc13        | 243983 | zinc finger, DHHC domain containing 13                       | 2.98 | 1.77 | 0.87 |
| A_51_P327001  | AK032374  | Alkbh8         | 67667  | alkB, alkylation repair homolog 8 (E. coli)                  | 3.61 | 1.76 | 0.31 |
| A_52_P463346  | NM_012032 | Serinc3        | 26943  | serine incorporator 3                                        | 3.21 | 1.76 | 0.59 |
| A_52_P286109  | NM_172730 | C130022K2      | 232236 | RIKEN cDNA C130022K22 gene                                   | 3.70 | 1.76 | 0.27 |
| A_52_P314985  | NA        | NA             | NA     | NA                                                           | 5.51 | 1.76 | 0.00 |
| A_52_P175852  | NA        | NA             | NA     | NA                                                           | 3.01 | 1.76 | 0.82 |
| A_52_P470972  | NM_011596 | Atp6v0a2       | 21871  | ATPase, H+ transporting, lysosomal V0 subunit A2             | 3.74 | 1.76 | 0.26 |
| A_51_P317443  | NM_145822 | Cd3eap         | 70333  | CD3E antigen, epsilon polypeptide associated protein         | 3.24 | 1.76 | 0.56 |
| A_51_P190765  | NM_025517 | Rtcd1          | 66368  | RNA terminal phosphate cyclase domain 1                      | 4.25 | 1.76 | 0.13 |
| A_51_P338397  | NM_026145 | Kctd10         | 330171 | potassium channel tetramerisation domain containing 1C       | 3.29 | 1.76 | 0.52 |
| A_51_P384499  | NM_007590 | Calm3          | 12315  | calmodulin 3                                                 | 3.01 | 1.76 | 0.81 |
| A_51_P518592  | NM_139227 | Atxn7          | 246103 | ataxin 7                                                     | 3.56 | 1.76 | 0.35 |
| A_52_P418734  | NM_025739 | Rnf220         | 66743  | ring finger protein 220                                      | 4.17 | 1.76 | 0.12 |
| A_51_P127756  | NM_017397 | Ddx20          | 53975  | DEAD (Asp-Glu-Ala-Asp) box polypeptide 20                    | 3.13 | 1.76 | 0.68 |
| A_51_P137150  | NM_144831 | Dhx8           | 217207 | DEAH (Asp-Glu-Ala-His) box polypeptide 8                     | 3.03 | 1.75 | 0.79 |
| A_52_P107354  | NM_026030 | Eif2s2         | 67204  | eukaryotic translation initiation factor 2, subunit 2 (beta) | 3.00 | 1.75 | 0.85 |
| A_52_P565940  | NM_008739 | Nsd1           | 18193  | nuclear receptor-binding SET-domain protein 1                | 3.33 | 1.75 | 0.48 |
| A_52_P123665  | NM_029929 | Vps33a         | 77573  | vacuolar protein sorting 33A (yeast)                         | 3.43 | 1.75 | 0.40 |
| A_51_P216147  | NM_007927 | Emd            | 13726  | emerin                                                       | 3.94 | 1.75 | 0.19 |
| A_52_P456617  | NM_001039 | Plekhh3        | 241075 | pleckstrin homology domain containing, family M, memb        | 3.13 | 1.75 | 0.67 |

|              |            |           |        |                                                           |      |      |      |
|--------------|------------|-----------|--------|-----------------------------------------------------------|------|------|------|
| A_52_P83913  | NM_138744  | Ssx2ip    | 99167  | synovial sarcoma, X breakpoint 2 interacting protein      | 2.95 | 1.75 | 0.93 |
| A_52_P256569 | NM_026797  | Dbnidd2   | 52840  | dysbindin (dystrobrevin binding protein 1) domain contai  | 4.63 | 1.75 | 0.05 |
| A_51_P320626 | AK038228   | NA        | NA     | NA                                                        | 3.33 | 1.75 | 0.49 |
| A_51_P500424 | NM_133763  | Dnttip1   | 76233  | deoxynucleotidyltransferase, terminal, interacting protei | 3.67 | 1.75 | 0.28 |
| A_52_P205991 | NM_008142  | Gnb1      | 14688  | guanine nucleotide binding protein (G protein), beta 1    | 3.04 | 1.75 | 0.78 |
| A_52_P10254  | NM_011874  | Psmc4     | 23996  | proteasome (prosome, macropain) 26S subunit, ATPase,      | 3.32 | 1.75 | 0.49 |
| A_52_P309044 | NM_001012: | Ccdc55    | 237859 | coiled-coil domain containing 55                          | 3.07 | 1.75 | 0.74 |
| A_52_P552893 | NM_026676  | 0610007P2 | 68327  | RIKEN cDNA 0610007P22 gene                                | 3.70 | 1.74 | 0.27 |
| A_52_P553673 | BC061503   | Ttc17     | 74569  | tetratricopeptide repeat domain 17                        | 4.02 | 1.74 | 0.18 |
| A_52_P142346 | NA         | NA        | NA     | NA                                                        | 3.67 | 1.74 | 0.29 |
| A_52_P90265  | NM_011671  | Ucp2      | 22228  | uncoupling protein 2 (mitochondrial, proton carrier)      | 3.47 | 1.74 | 0.39 |
| A_51_P355820 | BC027683   | Zfp688    | 69234  | zinc finger protein 688                                   | 3.48 | 1.74 | 0.37 |
| A_51_P240864 | NM_029012  | Sppl3     | 74585  | signal peptide peptidase 3                                | 3.94 | 1.74 | 0.19 |
| A_52_P591204 | NM_134155  | Brms1     | 107392 | breast cancer metastasis-suppressor 1                     | 3.51 | 1.74 | 0.36 |
| A_51_P463428 | NM_178149  | Pik3ip1   | 216505 | phosphoinositide-3-kinase interacting protein 1           | 4.63 | 1.74 | 0.05 |
| A_51_P302550 | NA         | NA        | NA     | NA                                                        | 5.07 | 1.74 | 0.00 |
| A_51_P241111 | NM_133884  | Gpn2      | 100210 | GPN-loop GTPase 2                                         | 3.24 | 1.74 | 0.56 |
| A_51_P455027 | NM_026932  | Ebna1bp2  | 69072  | EBNA1 binding protein 2                                   | 3.19 | 1.74 | 0.62 |
| A_52_P432685 | NM_146012  | Ctdsp2    | 52468  | CTD (carboxy-terminal domain, RNA polymerase II, polyp    | 3.11 | 1.74 | 0.70 |
| A_51_P213459 | AK046920   | Asb7      | 117589 | ankyrin repeat and SOCS box-containing 7                  | 3.44 | 1.74 | 0.40 |
| A_51_P406365 | NM_026859  | Maf1      | 68877  | MAF1 homolog ( <i>S. cerevisiae</i> )                     | 3.27 | 1.74 | 0.53 |
| A_52_P105890 | XR_003089  | NA        | NA     | NA                                                        | 3.12 | 1.74 | 0.68 |
| A_51_P273513 | NM_177263  | Zhx3      | 320799 | zinc fingers and homeoboxes 3                             | 5.20 | 1.73 | 0.00 |
| A_51_P390314 | AK165554   | Wdfy1     | 69368  | WD repeat and FYVE domain containing 1                    | 3.32 | 1.73 | 0.49 |
| A_51_P242767 | NM_153582  | Cmtm4     | 97487  | CKLF-like MARVEL transmembrane domain containing 4        | 5.03 | 1.73 | 0.08 |
| A_51_P393524 | NM_009070  | Rnps1     | 19826  | ribonucleic acid binding protein S1                       | 3.05 | 1.73 | 0.76 |
| A_51_P450957 | NM_007392  | Acta2     | 11475  | actin, alpha 2, smooth muscle, aorta                      | 3.29 | 1.73 | 0.52 |
| A_51_P359018 | NM_011841  | Mapk7     | 23939  | mitogen-activated protein kinase 7                        | 3.44 | 1.73 | 0.40 |
| A_52_P266997 | NA         | NA        | NA     | NA                                                        | 3.19 | 1.73 | 0.62 |
| A_51_P199175 | AK002390   | 2700038G2 | 67194  | RIKEN cDNA 2700038G22 gene                                | 3.92 | 1.73 | 0.19 |
| A_52_P337716 | NA         | NA        | NA     | NA                                                        | 3.12 | 1.73 | 0.70 |
| A_51_P275077 | NM_021332  | Glp1r     | 14652  | glucagon-like peptide 1 receptor                          | 3.52 | 1.73 | 0.34 |
| A_51_P332652 | NM_172574  | Pqlc3     | 217430 | PQ loop repeat containing                                 | 4.33 | 1.73 | 0.11 |
| A_51_P481191 | NM_027382  | Hdac8     | 70315  | histone deacetylase 8                                     | 3.89 | 1.73 | 0.21 |

|              |           |                 |        |                                                           |      |      |      |
|--------------|-----------|-----------------|--------|-----------------------------------------------------------|------|------|------|
| A_51_P511529 | NM_175311 | Zfp513          | 101023 | zinc finger protein 513                                   | 3.35 | 1.73 | 0.47 |
| A_51_P193669 | NM_133801 | Gtf2f1          | 98053  | general transcription factor IIF, polypeptide 1           | 3.55 | 1.73 | 0.34 |
| A_51_P427432 | NM_080289 | Grhpr           | 76238  | glyoxylate reductase/hydroxypyruvate reductase            | 5.47 | 1.73 | 0.00 |
| A_51_P181772 | NM_011212 | Ptpre           | 19267  | protein tyrosine phosphatase, receptor type, E            | 3.38 | 1.73 | 0.44 |
| A_52_P360552 | NM_029777 | Rhbdd1          | 76867  | rhomboid domain containing 1                              | 4.10 | 1.73 | 0.14 |
| A_51_P389957 | NM_016758 | Rgs14           | 51791  | regulator of G-protein signaling 14                       | 4.98 | 1.73 | 0.08 |
| A_52_P335548 | NM_025824 | Bzw1            | 66882  | basic leucine zipper and W2 domains 1                     | 3.57 | 1.73 | 0.33 |
| A_51_P352140 | NM_001013 | Dync1li2        | 234663 | dynein, cytoplasmic 1 light intermediate chain 2          | 3.47 | 1.73 | 0.38 |
| A_52_P241599 | NM_026034 | Armc10          | 67211  | armadillo repeat containing 10                            | 3.04 | 1.73 | 0.79 |
| A_51_P397493 | NM_017401 | Polm            | 54125  | polymerase (DNA directed), mu                             | 4.64 | 1.73 | 0.05 |
| A_52_P261184 | AK085780  | Il1rl2          | 107527 | interleukin 1 receptor-like 2                             | 2.92 | 1.72 | 0.96 |
| A_52_P100381 | BC051084  | Zbtb42          | 382639 | zinc finger and BTB domain containing 42                  | 3.03 | 1.72 | 0.79 |
| A_52_P468937 | NM_011743 | Zfp106          | 20402  | zinc finger protein 106                                   | 2.98 | 1.72 | 0.87 |
| A_51_P192130 | NM_009288 | Stk10           | 20868  | serine/threonine kinase 10                                | 5.41 | 1.72 | 0.00 |
| A_51_P375267 | U58884    | Dbnl            | 13169  | drebrin-like                                              | 4.89 | 1.72 | 0.07 |
| A_51_P420918 | NM_020498 | Ly6i            | 57248  | lymphocyte antigen 6 complex, locus I                     | 3.77 | 1.72 | 0.25 |
| A_51_P227090 | NM_019511 | Ramp3           | 56089  | receptor (calcitonin) activity modifying protein 3        | 3.64 | 1.72 | 0.31 |
| A_51_P119106 | NM_008774 | Pabpc1          | 18458  | poly(A) binding protein, cytoplasmic 1                    | 3.94 | 1.72 | 0.19 |
| A_51_P493915 | NM_011973 | Stk30           | 26448  | serine/threonine kinase 30                                | 3.11 | 1.72 | 0.70 |
| A_52_P525837 | NM_175113 | Trmt6           | 66926  | tRNA methyltransferase 6 homolog ( <i>S. cerevisiae</i> ) | 3.45 | 1.72 | 0.40 |
| A_51_P203850 | AK019727  | 4930539H178188  |        | RIKEN cDNA 4930539H15 gene                                | 3.65 | 1.72 | 0.30 |
| A_52_P488200 | NM_026269 | 1110007L1 67604 |        | RIKEN cDNA 1110007L15 gene                                | 3.26 | 1.72 | 0.53 |
| A_52_P73559  | XM_914588 | Gm7241          | 638532 | predicted gene 7241                                       | 3.13 | 1.72 | 0.68 |
| A_51_P267370 | NM_022417 | Itm2c           | 64294  | integral membrane protein 2C                              | 6.73 | 1.72 | 0.00 |
| A_51_P220370 | NM_133751 | NA              | NA     | NA                                                        | 2.91 | 1.72 | 0.98 |
| A_51_P190667 | NM_130860 | Cdk9            | 107951 | cyclin-dependent kinase 9 (CDC2-related kinase)           | 2.95 | 1.72 | 0.93 |
| A_51_P359017 | NM_011841 | Mapk7           | 23939  | mitogen-activated protein kinase 7                        | 3.84 | 1.71 | 0.22 |
| A_51_P321580 | NM_011873 | Dazap2          | 23994  | DAZ associated protein 2                                  | 4.01 | 1.71 | 0.18 |
| A_52_P418884 | NM_017464 | Nedd9           | 18003  | neural precursor cell expressed, developmentally down-r   | 3.77 | 1.71 | 0.25 |
| A_52_P686701 | NM_028728 | Nfam1           | 74039  | Nfat activating molecule with ITAM motif 1                | 3.91 | 1.71 | 0.21 |
| A_52_P375764 | NM_009444 | Tgoln2          | 22135  | trans-golgi network protein 2                             | 3.89 | 1.71 | 0.21 |
| A_52_P385229 | NM_030690 | Rai14           | 75646  | retinoic acid induced 14                                  | 5.75 | 1.71 | 0.00 |
| A_52_P149250 | NM_012042 | Cul1            | 26965  | cullin 1                                                  | 3.95 | 1.71 | 0.19 |
| A_51_P392209 | NM_146253 | Zbtb6           | 241322 | zinc finger and BTB domain containing 6                   | 3.23 | 1.71 | 0.58 |

|               |           |                 |        |                                                                  |      |      |      |
|---------------|-----------|-----------------|--------|------------------------------------------------------------------|------|------|------|
| A_52_P364776  | NM_008563 | Mcm3            | 17215  | minichromosome maintenance deficient 3 ( <i>S. cerevisiae</i> )  | 4.18 | 1.71 | 0.12 |
| A_52_P144917  | NM_029756 | Sdccag8         | 76816  | serologically defined colon cancer antigen 8                     | 3.02 | 1.71 | 0.79 |
| A_52_P601914  | NM_146075 | Lemd2           | 224640 | LEM domain containing 2                                          | 3.25 | 1.71 | 0.55 |
| A_51_P243532  | NM_019755 | Plp2            | 18824  | proteolipid protein 2                                            | 3.59 | 1.71 | 0.32 |
| A_51_P136845  | NM_027804 | Usp19           | 71472  | ubiquitin specific peptidase 19                                  | 3.77 | 1.71 | 0.25 |
| A_52_P641147  | NM_146002 | Rhbdd2          | 215160 | rhomboid domain containing 2                                     | 5.02 | 1.71 | 0.08 |
| A_52_P1189114 | NA        | NA              | NA     | NA                                                               | 3.32 | 1.71 | 0.49 |
| A_52_P566316  | AK160272  | 2310015A169548  |        | RIKEN cDNA 2310015A10 gene                                       | 3.01 | 1.71 | 0.82 |
| A_51_P133651  | NM_031391 | Gtf2a1          | 83602  | general transcription factor II A, 1                             | 3.12 | 1.71 | 0.70 |
| A_51_P385849  | NM_177307 | Cyp4f39         | 320997 | cytochrome P450, family 4, subfamily f, polypeptide 39           | 3.63 | 1.70 | 0.31 |
| A_52_P125494  | NM_199017 | 9230110C1234912 |        | RIKEN cDNA 9230110C19 gene                                       | 5.45 | 1.70 | 0.00 |
| A_51_P195153  | NM_013882 | Gtse1           | 29870  | G two S phase expressed protein 1                                | 4.08 | 1.70 | 0.16 |
| A_51_P417186  | NM_020483 | Sap30bp         | 57230  | SAP30 binding protein                                            | 3.14 | 1.70 | 0.67 |
| A_51_P382500  | AK147562  | Dip2b           | 239667 | DIP2 disco-interacting protein 2 homolog B ( <i>Drosophila</i> ) | 3.21 | 1.70 | 0.59 |
| A_52_P392517  | NM_080708 | Bmp2k           | 140780 | BMP2 inducible kinase                                            | 2.97 | 1.70 | 0.89 |
| A_51_P369683  | NM_007842 | Dhx9            | 13211  | DEAH (Asp-Glu-Ala-His) box polypeptide 9                         | 4.17 | 1.70 | 0.12 |
| A_51_P507053  | NM_134086 | Slc38a1         | 105727 | solute carrier family 38, member 1                               | 4.30 | 1.70 | 0.11 |
| A_52_P189449  | NM_023743 | Eif4enif1       | 74203  | eukaryotic translation initiation factor 4E nuclear import       | 3.18 | 1.70 | 0.62 |
| A_51_P488626  | NM_030131 | Cnih4           | 98417  | cornichon homolog 4 ( <i>Drosophila</i> )                        | 4.13 | 1.70 | 0.14 |
| A_52_P558087  | NM_026173 | 1200014M67463   |        | RIKEN cDNA 1200014M14 gene                                       | 3.18 | 1.70 | 0.62 |
| A_51_P155522  | NM_008945 | Psmb4           | 19172  | proteasome (prosome, macropain) subunit, beta type 4             | 3.78 | 1.70 | 0.25 |
| A_52_P607674  | NM_015817 | Ppap2c          | 50784  | phosphatidic acid phosphatase type 2C                            | 5.88 | 1.70 | 0.00 |
| A_52_P665335  | NM_133998 | 1810008A1108707 |        | RIKEN cDNA 1810008A18 gene                                       | 4.91 | 1.70 | 0.07 |
| A_51_P419571  | NM_027101 | Polr2d          | 69241  | polymerase (RNA) II (DNA directed) polypeptide D                 | 3.57 | 1.70 | 0.33 |
| A_52_P351638  | NM_020275 | Tnfrsf10b       | 21933  | tumor necrosis factor receptor superfamily, member 10b           | 3.75 | 1.70 | 0.26 |
| A_52_P572284  | NM_008640 | Laptm4a         | 17775  | lysosomal-associated protein transmembrane 4A                    | 3.15 | 1.70 | 0.66 |
| A_52_P557995  | NM_025602 | Ccdc59          | 52713  | coiled-coil domain containing 59                                 | 3.70 | 1.70 | 0.28 |
| A_52_P335178  | NM_011073 | Prf1            | 18646  | perforin 1 (pore forming protein)                                | 3.04 | 1.70 | 0.78 |
| A_51_P325836  | NM_017371 | Hpx             | 15458  | hemopexin                                                        | 3.76 | 1.70 | 0.26 |
| A_51_P297778  | NM_194344 | Sh3tc1          | 231147 | SH3 domain and tetratricopeptide repeats 1                       | 2.90 | 1.69 | 0.99 |
| A_51_P473229  | NM_009565 | Zbtb7b          | 22724  | zinc finger and BTB domain containing 7B                         | 3.16 | 1.69 | 0.65 |
| A_52_P262914  | NM_024215 | Zfp593          | 68040  | zinc finger protein 593                                          | 3.41 | 1.69 | 0.43 |
| A_51_P117226  | NA        | NA              | NA     | NA                                                               | 4.49 | 1.69 | 0.09 |
| A_52_P627177  | NM_010833 | Msn             | 17698  | moesin                                                           | 5.59 | 1.69 | 0.00 |

|              |           |           |        |                                                              |      |      |      |
|--------------|-----------|-----------|--------|--------------------------------------------------------------|------|------|------|
| A_52_P628928 | NM_001002 | Smg6      | 103677 | Smg-6 homolog, nonsense mediated mRNA decay factor           | 3.34 | 1.69 | 0.47 |
| A_52_P83905  | NM_007885 | Slc26a2   | 13521  | solute carrier family 26 (sulfate transporter), member 2     | 3.10 | 1.69 | 0.70 |
| A_52_P647488 | XM_898393 | NA        | NA     | NA                                                           | 3.84 | 1.69 | 0.22 |
| A_52_P496870 | NM_025521 | 2310011J0 | 66374  | RIKEN cDNA 2310011J03 gene                                   | 4.30 | 1.69 | 0.11 |
| A_51_P439824 | NM_018771 | Gipc1     | 67903  | GIPC PDZ domain containing family, member 1                  | 3.28 | 1.69 | 0.52 |
| A_52_P253004 | NM_022327 | Ralb      | 64143  | v-ral simian leukemia viral oncogene homolog B (ras relat    | 3.68 | 1.69 | 0.29 |
| A_52_P380502 | NM_201385 | Plec      | 18810  | plectin                                                      | 4.89 | 1.69 | 0.07 |
| A_51_P133037 | NM_008889 | Ppp1r14b  | 18938  | protein phosphatase 1, regulatory (inhibitor) subunit 14B    | 3.21 | 1.69 | 0.59 |
| A_51_P443723 | NM_211358 | Slc35c1   | 228368 | solute carrier family 35, member C1                          | 3.23 | 1.69 | 0.56 |
| A_51_P238803 | XM_620178 | NA        | NA     | NA                                                           | 4.40 | 1.69 | 0.10 |
| A_52_P402577 | NM_024181 | Dnajc10   | 66861  | Dnaj (Hsp40) homolog, subfamily C, member 10                 | 4.54 | 1.69 | 0.09 |
| A_51_P340704 | NM_027328 | Prpf31    | 68988  | PRP31 pre-mRNA processing factor 31 homolog (yeast)          | 3.29 | 1.69 | 0.52 |
| A_52_P418056 | NM_207209 | Sec24b    | 99683  | Sec24 related gene family, member B ( <i>S. cerevisiae</i> ) | 3.66 | 1.69 | 0.29 |
| A_51_P369636 | NM_026115 | Hat1      | 107435 | histone aminotransferase 1                                   | 4.34 | 1.69 | 0.11 |
| A_52_P421805 | NM_025830 | Wwp2      | 66894  | WW domain containing E3 ubiquitin protein ligase 2           | 3.67 | 1.69 | 0.29 |
| A_51_P336060 | NM_008490 | Lcat      | 16816  | lecithin cholesterol acyltransferase                         | 4.63 | 1.69 | 0.05 |
| A_51_P502724 | XM_283903 | Fam102b   | 329739 | family with sequence similarity 102, member B                | 3.85 | 1.69 | 0.22 |
| A_52_P214042 | NM_028125 | Zbtb46    | 72147  | zinc finger and BTB domain containing 46                     | 2.92 | 1.69 | 0.96 |
| A_52_P232346 | NA        | NA        | NA     | NA                                                           | 2.98 | 1.68 | 0.89 |
| A_51_P176517 | NM_170592 | Mettl11a  | 66617  | methyltransferase like 11A                                   | 3.93 | 1.68 | 0.19 |
| A_52_P338039 | NM_178613 | 4933433P1 | 66787  | RIKEN cDNA 4933433P14 gene                                   | 3.15 | 1.68 | 0.66 |
| A_51_P454207 | NM_008679 | Ncoa3     | 17979  | nuclear receptor coactivator 3                               | 3.74 | 1.68 | 0.26 |
| A_52_P115787 | NM_010345 | Grb10     | 14783  | growth factor receptor bound protein 10                      | 3.37 | 1.68 | 0.45 |
| A_52_P574190 | NM_025894 | Psmc12    | 66997  | proteasome (prosome, macropain) 26S subunit, non-ATP         | 2.96 | 1.68 | 0.92 |
| A_52_P549184 | NM_178712 | Gpr64     | 237175 | G protein-coupled receptor 64                                | 3.64 | 1.68 | 0.31 |
| A_52_P508167 | NM_010093 | E2f3      | 13557  | E2F transcription factor 3                                   | 3.35 | 1.68 | 0.47 |
| A_51_P474688 | NM_027236 | Eif1ad    | 69860  | eukaryotic translation initiation factor 1A domain contain   | 3.31 | 1.68 | 0.50 |
| A_52_P621991 | NM_001042 | Apaf1     | 11783  | apoptotic peptidase activating factor 1                      | 3.24 | 1.68 | 0.56 |
| A_51_P133684 | NM_013808 | Csrp3     | 13009  | cysteine and glycine-rich protein 3                          | 2.97 | 1.68 | 0.89 |
| A_51_P460734 | NM_011103 | Prkcd     | 18753  | protein kinase C, delta                                      | 3.24 | 1.68 | 0.56 |
| A_51_P389386 | NM_026746 | Nsmce2    | 68501  | non-SMC element 2 homolog (MMS21, <i>S. cerevisiae</i> )     | 2.99 | 1.68 | 0.85 |
| A_52_P595476 | NM_183390 | Klhl6     | 239743 | kelch-like 6 ( <i>Drosophila</i> )                           | 3.41 | 1.68 | 0.43 |
| A_52_P381303 | BC082565  | Gins2     | 272551 | GINS complex subunit 2 (Psf2 homolog)                        | 4.99 | 1.68 | 0.08 |
| A_52_P852090 | AK086611  | Gm6288    | 622129 | predicted gene 6288                                          | 3.07 | 1.68 | 0.75 |

|              |            |           |        |                                                          |      |      |      |
|--------------|------------|-----------|--------|----------------------------------------------------------|------|------|------|
| A_51_P291227 | NM_001005! | Arhgap30  | 226652 | Rho GTPase activating protein 30                         | 3.72 | 1.68 | 0.27 |
| A_51_P179131 | AK157021   | Vasp      | 22323  | vasodilator-stimulated phosphoprotein                    | 3.03 | 1.68 | 0.79 |
| A_51_P446731 | XM_982789  | NA        | NA     | NA                                                       | 4.01 | 1.67 | 0.18 |
| A_51_P396273 | NM_010937  | Nras      | 18176  | neuroblastoma ras oncogene                               | 3.26 | 1.67 | 0.53 |
| A_52_P58024  | XR_002833  | NA        | NA     | NA                                                       | 3.71 | 1.67 | 0.28 |
| A_52_P54008  | NM_019973  | Son       | 20658  | Son DNA binding protein                                  | 2.95 | 1.67 | 0.93 |
| A_52_P654618 | NM_001005: | Znhit3    | 448850 | zinc finger, HIT type 3                                  | 4.53 | 1.67 | 0.09 |
| A_52_P231714 | NM_013497  | Creb3     | 12913  | cAMP responsive element binding protein 3                | 3.10 | 1.67 | 0.70 |
| A_51_P259555 | NM_172876  | Gpatch3   | 242691 | G patch domain containing 3                              | 3.44 | 1.67 | 0.40 |
| A_52_P33593  | NM_032544  | Gtpbp3    | 70359  | GTP binding protein 3                                    | 2.92 | 1.67 | 0.96 |
| A_52_P162538 | AK172123   | Chmp6     | 208092 | chromatin modifying protein 6                            | 4.95 | 1.67 | 0.07 |
| A_52_P668903 | NA         | NA        | NA     | NA                                                       | 3.06 | 1.67 | 0.75 |
| A_52_P395290 | NM_028814  | 2810403AC | 74200  | RIKEN cDNA 2810403A07 gene                               | 4.19 | 1.67 | 0.13 |
| A_51_P469008 | NM_010119  | Ehd1      | 13660  | EH-domain containing 1                                   | 3.25 | 1.66 | 0.56 |
| A_51_P116421 | NM_013790  | Abcc5     | 27416  | ATP-binding cassette, sub-family C (CFTR/MRP), member    | 3.21 | 1.66 | 0.58 |
| A_52_P373369 | NM_007905  | Phc1      | 13619  | polyhomeotic-like 1 (Drosophila)                         | 3.20 | 1.66 | 0.60 |
| A_52_P71869  | NM_201389  | Plec      | 18810  | plectin                                                  | 3.23 | 1.66 | 0.58 |
| A_51_P423444 | NM_199448  | Fez2      | 225020 | fasciculation and elongation protein zeta 2 (zygin II)   | 3.96 | 1.66 | 0.17 |
| A_52_P18665  | NM_025772  | Dtnbp1    | 94245  | dystrobrevin binding protein 1                           | 3.31 | 1.66 | 0.49 |
| A_51_P259638 | AK047380   | LOC14210  | 14210  | hypothetical LOC14210                                    | 3.27 | 1.66 | 0.53 |
| A_52_P181235 | NM_025917  | Use1      | 67023  | unconventional SNARE in the ER 1 homolog (S. cerevisiae) | 4.35 | 1.66 | 0.11 |
| A_52_P384392 | NM_023910  | Tsc22d4   | 78829  | TSC22 domain family, member 4                            | 3.03 | 1.66 | 0.79 |
| A_51_P101576 | NM_018875  | Snx12     | 55988  | sorting nexin 12                                         | 3.29 | 1.66 | 0.52 |
| A_51_P432538 | NM_010397  | H2-T22    | 15039  | histocompatibility 2, T region locus 22                  | 3.80 | 1.66 | 0.24 |
| A_51_P364146 | NM_010699  | Ldha      | 16828  | lactate dehydrogenase A                                  | 2.94 | 1.66 | 0.93 |
| A_51_P416243 | NM_019393  | Exosc9    | 50911  | exosome component 9                                      | 2.96 | 1.66 | 0.91 |
| A_52_P61758  | NM_027008  | Kctd5     | 69259  | potassium channel tetramerisation domain containing 5    | 3.59 | 1.66 | 0.32 |
| A_51_P106868 | NM_013901  | Slc39a1   | 30791  | solute carrier family 39 (zinc transporter), member 1    | 3.96 | 1.66 | 0.17 |
| A_52_P319591 | NM_017477  | Copg      | 54161  | coatamer protein complex, subunit gamma                  | 3.53 | 1.66 | 0.34 |
| A_52_P635338 | NM_010194  | Fes       | 14159  | feline sarcoma oncogene                                  | 2.98 | 1.66 | 0.89 |
| A_51_P433430 | NM_007905  | Phc1      | 13619  | polyhomeotic-like 1 (Drosophila)                         | 3.62 | 1.65 | 0.31 |
| A_51_P195573 | NM_010066  | Dnmt1     | 13433  | DNA methyltransferase (cytosine-5) 1                     | 4.22 | 1.65 | 0.13 |
| A_51_P413866 | NM_008198  | Cfb       | 14962  | complement factor B                                      | 4.59 | 1.65 | 0.10 |
| A_51_P410022 | NM_026660  | Mfsd10    | 68294  | major facilitator superfamily domain containing 10       | 4.50 | 1.65 | 0.09 |



|               |           |           |        |                                                           |      |      |      |
|---------------|-----------|-----------|--------|-----------------------------------------------------------|------|------|------|
| A_52_P1141039 | AW550460  | NA        | NA     | NA                                                        | 3.36 | 1.65 | 0.46 |
| A_51_P178585  | NM_016775 | Dnajc5    | 13002  | Dnaj (Hsp40) homolog, subfamily C, member 5               | 3.83 | 1.65 | 0.23 |
| A_51_P120097  | NM_001034 | Ppp2r1b   | 73699  | protein phosphatase 2 (formerly 2A), regulatory subunit   | 3.58 | 1.65 | 0.32 |
| A_52_P495453  | NM_030714 | Dtx3      | 80904  | deltex 3 homolog (Drosophila)                             | 3.75 | 1.65 | 0.26 |
| A_52_P205055  | XR_003742 | NA        | NA     | NA                                                        | 3.14 | 1.65 | 0.67 |
| A_52_P262883  | NM_008889 | Ppp1r14b  | 18938  | protein phosphatase 1, regulatory (inhibitor) subunit 14B | 3.35 | 1.65 | 0.46 |
| A_51_P179041  | D87966    | Tead4     | 21679  | TEA domain family member 4                                | 3.53 | 1.65 | 0.34 |
| A_51_P305956  | NM_013501 | Cryaa     | 12954  | crystallin, alpha A                                       | 3.64 | 1.65 | 0.30 |
| A_52_P418644  | NM_019755 | Plp2      | 18824  | proteolipid protein 2                                     | 3.77 | 1.65 | 0.25 |
| A_52_P281941  | NM_178395 | Zdhhc2    | 70546  | zinc finger, DHHC domain containing 2                     | 4.47 | 1.64 | 0.08 |
| A_52_P885203  | CF582774  | Rnasel    | 24014  | ribonuclease L (2', 5'-oligoadenylate synthetase-deper    | 3.04 | 1.64 | 0.79 |
| A_52_P250433  | AK045684  | B230303O1 | 319739 | RIKEN cDNA B230303O12 gene                                | 3.05 | 1.64 | 0.76 |
| A_52_P219314  | NM_009499 | Vasp      | 22323  | vasodilator-stimulated phosphoprotein                     | 3.03 | 1.64 | 0.79 |
| A_51_P140942  | NM_018739 | rp9       | 55934  | retinitis pigmentosa 9 (human)                            | 3.62 | 1.64 | 0.31 |
| A_51_P349023  | NM_026309 | Lsm3      | 67678  | LSM3 homolog, U6 small nuclear RNA associated (S. cere    | 3.40 | 1.64 | 0.42 |
| A_51_P415220  | NM_009517 | Zmat3     | 22401  | zinc finger matrin type 3                                 | 4.32 | 1.64 | 0.11 |
| A_52_P309657  | NA        | NA        | NA     | NA                                                        | 3.34 | 1.64 | 0.48 |
| A_51_P153787  | NM_028632 | Fcf1      | 73736  | FCF1 small subunit (SSU) processome component homolog     | 3.26 | 1.64 | 0.53 |
| A_52_P253748  | NM_001024 | Zbtb45    | 232879 | zinc finger and BTB domain containing 45                  | 3.16 | 1.64 | 0.65 |
| A_52_P198993  | NM_133847 | Tm9sf4    | 99237  | transmembrane 9 superfamily protein member 4              | 2.91 | 1.64 | 0.99 |
| A_52_P319581  | NM_001037 | Tcf25     | 66855  | transcription factor 25 (basic helix-loop-helix)          | 2.94 | 1.64 | 0.93 |
| A_52_P182118  | NA        | NA        | NA     | NA                                                        | 3.82 | 1.64 | 0.24 |
| A_51_P181227  | NM_001038 | Smurf1    | 75788  | SMAD specific E3 ubiquitin protein ligase 1               | 3.08 | 1.64 | 0.72 |
| A_52_P630502  | NM_023200 | Ppp1r7    | 66385  | protein phosphatase 1, regulatory (inhibitor) subunit 7   | 3.91 | 1.64 | 0.21 |
| A_52_P676108  | NM_027187 | Rnaseh2a  | 69724  | ribonuclease H2, large subunit                            | 3.12 | 1.64 | 0.70 |
| A_52_P502754  | NM_009667 | Ampd3     | 11717  | adenosine monophosphate deaminase 3                       | 6.51 | 1.64 | 0.00 |
| A_51_P221460  | NM_025661 | Ormdl3    | 66612  | ORM1-like 3 (S. cerevisiae)                               | 3.07 | 1.64 | 0.74 |
| A_51_P370510  | NM_145450 | BC022687  | 217887 | cDNA sequence BC022687                                    | 3.45 | 1.63 | 0.40 |
| A_52_P81270   | NM_008397 | Itga6     | 16403  | integrin alpha 6                                          | 4.48 | 1.63 | 0.09 |
| A_52_P301166  | NM_013634 | Med1      | 19014  | mediator complex subunit 1                                | 3.41 | 1.63 | 0.43 |
| A_51_P148037  | NM_177364 | Sh3pxd2b  | 268396 | SH3 and PX domains 2B                                     | 3.38 | 1.63 | 0.45 |
| A_52_P277139  | NM_030886 | Ankrd17   | 81702  | ankyrin repeat domain 17                                  | 3.03 | 1.63 | 0.79 |
| A_52_P661672  | XM_915447 | NA        | NA     | NA                                                        | 4.54 | 1.63 | 0.09 |
| A_51_P235311  | NM_009438 | Rpl13a    | 22121  | ribosomal protein L13A                                    | 3.52 | 1.63 | 0.34 |

|              |            |          |        |                                                            |      |      |      |
|--------------|------------|----------|--------|------------------------------------------------------------|------|------|------|
| A_51_P493234 | NM_007752  | Cp       | 12870  | ceruloplasmin                                              | 4.57 | 1.63 | 0.09 |
| A_52_P325797 | NA         | NA       | NA     | NA                                                         | 3.09 | 1.63 | 0.71 |
| A_52_P447031 | NM_001039: | Morf4l1  | 21761  | mortality factor 4 like 1                                  | 3.05 | 1.63 | 0.76 |
| A_51_P149325 | NM_026545  | Psm8     | 57296  | proteasome (prosome, macropain) 26S subunit, non-ATP       | 3.13 | 1.63 | 0.67 |
| A_51_P163867 | NM_146081  | Ppp4r1   | 70351  | protein phosphatase 4, regulatory subunit 1                | 3.68 | 1.63 | 0.29 |
| A_52_P384158 | NM_177239  | Mysm1    | 320713 | myb-like, SWIRM and MPN domains 1                          | 3.47 | 1.63 | 0.39 |
| A_52_P252469 | NM_133927  | Itfg2    | 101142 | integrin alpha FG-GAP repeat containing 2                  | 3.47 | 1.63 | 0.39 |
| A_52_P29513  | NM_026602  | Bcas2    | 68183  | breast carcinoma amplified sequence 2                      | 3.39 | 1.63 | 0.44 |
| A_52_P225308 | NM_026944  | Alkbh3   | 69113  | alkB, alkylation repair homolog 3 (E. coli)                | 3.10 | 1.63 | 0.70 |
| A_51_P436051 | NM_025383  | Necap2   | 66147  | NECAP endocytosis associated 2                             | 4.81 | 1.62 | 0.06 |
| A_52_P82510  | NM_008707  | Nmt1     | 18107  | N-myristoyltransferase 1                                   | 3.15 | 1.62 | 0.66 |
| A_51_P161874 | NM_027212  | Med30    | 69790  | mediator complex subunit 30                                | 4.93 | 1.62 | 0.07 |
| A_52_P625940 | NM_027988  | Noxo1    | 71893  | NADPH oxidase organizer 1                                  | 3.73 | 1.62 | 0.26 |
| A_52_P615274 | NM_026001  | Rnaseh2b | 67153  | ribonuclease H2, subunit B                                 | 4.96 | 1.62 | 0.07 |
| A_51_P143528 | NM_183014  | Zfp184   | 193452 | zinc finger protein 184 (Kruppel-like)                     | 4.12 | 1.62 | 0.14 |
| A_51_P297799 | NM_001015: | Rap1gap2 | 380711 | RAP1 GTPase activating protein 2                           | 3.56 | 1.62 | 0.35 |
| A_51_P410830 | AK145471   | Upf3a    | 67031  | UPF3 regulator of nonsense transcripts homolog A (yeast)   | 3.72 | 1.62 | 0.27 |
| A_52_P671543 | NM_008895  | Pomc     | 18976  | pro-opiomelanocortin-alpha                                 | 4.21 | 1.62 | 0.13 |
| A_51_P487219 | BC079536   | Cep110   | 26920  | centrosomal protein 110                                    | 3.42 | 1.62 | 0.42 |
| A_52_P89884  | NM_001007: | Fndc3c1  | 333564 | fibronectin type III domain containing 3C1                 | 3.43 | 1.62 | 0.40 |
| A_51_P486190 | NM_011033  | Pabpc2   | 18459  | poly(A) binding protein, cytoplasmic 2                     | 3.13 | 1.62 | 0.67 |
| A_52_P56394  | DV058987   | Psmg4    | 69666  | proteasome (prosome, macropain) assembly chaperone         | 3.64 | 1.62 | 0.31 |
| A_52_P413034 | NM_008398  | Itga7    | 16404  | integrin alpha 7                                           | 3.25 | 1.62 | 0.55 |
| A_52_P283119 | AK164904   | Surf6    | 20935  | surfeit gene 6                                             | 5.80 | 1.62 | 0.00 |
| A_51_P406008 | NM_021555  | Brp16    | 59053  | brain protein 16                                           | 3.60 | 1.62 | 0.32 |
| A_51_P514684 | NM_026518  | Rnf146   | 68031  | ring finger protein 146                                    | 3.52 | 1.62 | 0.35 |
| A_52_P439995 | NM_001039: | Rab43    | 69834  | RAB43, member RAS oncogene family                          | 3.08 | 1.62 | 0.71 |
| A_51_P364786 | NM_024187  | U2af1    | 108121 | U2 small nuclear ribonucleoprotein auxiliary factor (U2Af) | 3.34 | 1.62 | 0.48 |
| A_52_P763562 | XM_146893  | Zc3h12c  | 244871 | zinc finger CCCH type containing 12C                       | 3.19 | 1.62 | 0.62 |
| A_51_P129767 | NM_019824  | Arpc3    | 56378  | actin related protein 2/3 complex, subunit 3               | 3.63 | 1.62 | 0.31 |
| A_51_P466490 | NM_146205  | Armc5    | 233912 | armadillo repeat containing 5                              | 3.31 | 1.62 | 0.49 |
| A_52_P526396 | NM_178628  | Atl1     | 73991  | atlastin GTPase 1                                          | 3.22 | 1.62 | 0.58 |
| A_51_P437559 | NM_011589  | Timeless | 21853  | timeless homolog (Drosophila)                              | 2.92 | 1.61 | 0.98 |
| A_51_P343913 | XM_994286  | Parp4    | 328417 | poly (ADP-ribose) polymerase family, member 4              | 3.32 | 1.61 | 0.49 |

|              |           |           |        |                                                              |      |      |      |
|--------------|-----------|-----------|--------|--------------------------------------------------------------|------|------|------|
| A_51_P372504 | NM_172833 | Malt1     | 240354 | mucosa associated lymphoid tissue lymphoma translocat        | 3.16 | 1.61 | 0.65 |
| A_51_P385054 | NM_011035 | Pak1      | 18479  | p21 protein (Cdc42/Rac)-activated kinase 1                   | 4.60 | 1.61 | 0.10 |
| A_52_P221057 | NA        | NA        | NA     | NA                                                           | 3.49 | 1.61 | 0.38 |
| A_51_P318371 | NM_172480 | Mtrr      | 210009 | 5-methyltetrahydrofolate-homocysteine methyltransfera        | 3.58 | 1.61 | 0.33 |
| A_51_P435348 | NM_145586 | Tmem159   | 233806 | transmembrane protein 159                                    | 3.38 | 1.61 | 0.45 |
| A_51_P100787 | AX775977  | Snw1      | 66354  | SNW domain containing 1                                      | 4.49 | 1.61 | 0.09 |
| A_52_P19016  | NM_016680 | Sfrs16    | 53609  | splicing factor, arginine/serine-rich 16                     | 2.92 | 1.61 | 0.98 |
| A_52_P337821 | AK139584  | Eif1a     | 13664  | eukaryotic translation initiation factor 1A                  | 2.89 | 1.61 | 1.02 |
| A_52_P161339 | NM_026164 | Pnpla8    | 67452  | patatin-like phospholipase domain containing 8               | 3.11 | 1.61 | 0.70 |
| A_52_P54274  | AK043055  | Masp1     | 17174  | mannan-binding lectin serine peptidase 1                     | 3.89 | 1.61 | 0.21 |
| A_52_P374669 | XM_359326 | Kdm5a     | 214899 | lysine (K)-specific demethylase 5A                           | 2.99 | 1.61 | 0.87 |
| A_52_P508397 | AK140938  | 1810026B0 | 69170  | RIKEN cDNA 1810026B05 gene                                   | 3.29 | 1.61 | 0.52 |
| A_51_P232778 | NM_019661 | Ykt6      | 56418  | YKT6 homolog (S. Cerevisiae)                                 | 4.33 | 1.61 | 0.11 |
| A_52_P135707 | NM_013497 | Creb3     | 12913  | cAMP responsive element binding protein 3                    | 3.63 | 1.61 | 0.31 |
| A_51_P311945 | NM_010952 | Oaz2      | 18247  | ornithine decarboxylase antizyme 2                           | 3.09 | 1.61 | 0.71 |
| A_51_P372312 | NM_025317 | Mrpl54    | 66047  | mitochondrial ribosomal protein L54                          | 4.68 | 1.60 | 0.05 |
| A_52_P111866 | NM_028108 | Naa50     | 72117  | N(alpha)-acetyltransferase 50, NatE catalytic subunit        | 3.54 | 1.60 | 0.34 |
| A_52_P518160 | NM_016722 | Galns     | 50917  | galactosamine (N-acetyl)-6-sulfate sulfatase                 | 3.05 | 1.60 | 0.76 |
| A_51_P260721 | NM_016902 | Nphp1     | 53885  | nephronophthisis 1 (juvenile) homolog (human)                | 3.39 | 1.60 | 0.44 |
| A_51_P217967 | NM_024461 | 181003711 | 67704  | RIKEN cDNA 1810037117 gene                                   | 3.82 | 1.60 | 0.24 |
| A_52_P378629 | AK032099  | Dmxl2     | 235380 | Dmx-like 2                                                   | 3.03 | 1.60 | 0.79 |
| A_51_P324923 | NM_008549 | Man2a1    | 17158  | mannosidase 2, alpha 1                                       | 3.08 | 1.60 | 0.72 |
| A_52_P423296 | NM_199314 | Serpina11 | 380780 | serine (or cysteine) peptidase inhibitor, clade A (alpha-1 ; | 4.27 | 1.60 | 0.10 |
| A_51_P388847 | NM_145934 | Stap2     | 106766 | signal transducing adaptor family member 2                   | 3.14 | 1.60 | 0.67 |
| A_52_P448994 | AK086129  | Col4a1    | 12826  | collagen, type IV, alpha 1                                   | 4.92 | 1.60 | 0.07 |
| A_52_P577019 | NM_170669 | Rps15a    | 267019 | ribosomal protein S15A                                       | 5.20 | 1.60 | 0.00 |
| A_52_P4347   | NM_145125 | Brwd1     | 93871  | bromodomain and WD repeat domain containing 1                | 3.87 | 1.60 | 0.22 |
| A_51_P154679 | NM_173186 | Tbc1d24   | 224617 | TBC1 domain family, member 24                                | 3.41 | 1.60 | 0.42 |
| A_52_P121131 | AK033284  | 4930534B0 | 75216  | RIKEN cDNA 4930534B04 gene                                   | 3.43 | 1.60 | 0.40 |
| A_51_P434859 | XM_890447 | Mllt4     | 17356  | myeloid/lymphoid or mixed-lineage leukemia (trithorax l      | 2.92 | 1.60 | 0.96 |
| A_52_P284470 | NM_028156 | 1700001P0 | 72215  | RIKEN cDNA 1700001P01 gene                                   | 3.04 | 1.60 | 0.78 |
| A_52_P74427  | NM_028152 | Mms19     | 72199  | MMS19 (MET18 S. cerevisiae)                                  | 3.75 | 1.60 | 0.26 |
| A_52_P37665  | NM_025872 | Golt1b    | 66964  | golgi transport 1 homolog B (S. cerevisiae)                  | 3.97 | 1.60 | 0.17 |
| A_52_P282729 | NM_007658 | Cdc25a    | 12530  | cell division cycle 25 homolog A (S. pombe)                  | 2.93 | 1.60 | 0.95 |

|              |            |          |        |                                                            |      |      |      |
|--------------|------------|----------|--------|------------------------------------------------------------|------|------|------|
| A_52_P313279 | NM_001034! | NA       | NA     | NA                                                         | 4.77 | 1.60 | 0.06 |
| A_52_P289256 | XM_139711  | Arid1b   | 239985 | AT rich interactive domain 1B (SWI-like)                   | 4.34 | 1.59 | 0.11 |
| A_51_P377760 | NM_011882  | Rnasel   | 24014  | ribonuclease L (2', 5'-oligoadenylate synthetase-deper     | 3.28 | 1.59 | 0.53 |
| A_52_P220547 | NM_178686  | Cep120   | 225523 | centrosomal protein 120                                    | 5.01 | 1.59 | 0.08 |
| A_52_P515057 | NM_172685  | Slc25a24 | 229731 | solute carrier family 25 (mitochondrial carrier, phosphate | 3.07 | 1.59 | 0.74 |
| A_52_P348799 | NM_172253  | Twistnb  | 28071  | TWIST neighbor                                             | 3.25 | 1.59 | 0.55 |
| A_51_P415945 | NM_008944  | Psma2    | 19166  | proteasome (prosome, macropain) subunit, alpha type 2      | 3.33 | 1.59 | 0.49 |
| A_52_P111715 | NM_172451  | Galnt6   | 207839 | UDP-N-acetyl-alpha-D-galactosamine:polypeptide N-acet      | 3.72 | 1.59 | 0.27 |
| A_51_P317076 | NM_025917  | Use1     | 67023  | unconventional SNARE in the ER 1 homolog (S. cerevisiae    | 3.03 | 1.59 | 0.79 |
| A_51_P327469 | NM_026533  | Rps13    | 68052  | ribosomal protein S13                                      | 3.92 | 1.59 | 0.19 |
| A_51_P235002 | NM_011598  | Fabp9    | 21884  | fatty acid binding protein 9, testis                       | 3.24 | 1.59 | 0.56 |
| A_51_P161429 | NM_028965  | Snx11    | 74479  | sorting nexin 11                                           | 3.90 | 1.59 | 0.21 |
| A_51_P380514 | NM_028751  | Tjap1    | 74094  | tight junction associated protein 1                        | 2.91 | 1.59 | 0.98 |
| A_51_P199866 | NM_023371  | Pin1     | 23988  | protein (peptidyl-prolyl cis/trans isomerase) NIMA-intera  | 3.71 | 1.59 | 0.28 |
| A_52_P25567  | NM_028761  | Parn     | 74108  | poly(A)-specific ribonuclease (deadenylation nuclease)     | 3.16 | 1.59 | 0.65 |
| A_52_P434375 | AK163853   | Dock1    | 330662 | dedicator of cytokinesis 1                                 | 4.09 | 1.59 | 0.17 |
| A_51_P411225 | NM_153138  | Wipf1    | 215280 | WAS/WASL interacting protein family, member 1              | 4.60 | 1.59 | 0.10 |
| A_52_P109959 | XR_003150  | NA       | NA     | NA                                                         | 3.43 | 1.59 | 0.40 |
| A_51_P391996 | BC011329   | Pgd      | 110208 | phosphogluconate dehydrogenase                             | 3.26 | 1.58 | 0.53 |
| A_51_P293982 | NM_153119  | Plekho2  | 102595 | pleckstrin homology domain containing, family O membe      | 3.12 | 1.58 | 0.68 |
| A_51_P123345 | NM_007477  | Arf2     | 11841  | ADP-ribosylation factor 2                                  | 2.99 | 1.58 | 0.85 |
| A_51_P214365 | AK045173   | Zfp280d  | 235469 | zinc finger protein 280D                                   | 4.38 | 1.58 | 0.11 |
| A_51_P467349 | AK048725   | Trim62   | 67525  | tripartite motif-containing 62                             | 4.58 | 1.58 | 0.09 |
| A_51_P203451 | NM_009410  | Top3a    | 21975  | topoisomerase (DNA) III alpha                              | 3.15 | 1.58 | 0.66 |
| A_52_P458000 | NM_178901  | AI467606 | 101602 | expressed sequence AI467606                                | 3.62 | 1.58 | 0.31 |
| A_52_P405265 | NM_133831  | Gltscr2  | 68077  | glioma tumor suppressor candidate region gene 2            | 3.14 | 1.58 | 0.67 |
| A_51_P496996 | NM_001034! | NA       | NA     | NA                                                         | 4.33 | 1.58 | 0.11 |
| A_51_P504114 | NM_015804  | Atp11a   | 50770  | ATPase, class VI, type 11A                                 | 4.49 | 1.58 | 0.09 |
| A_52_P273438 | NA         | NA       | NA     | NA                                                         | 3.13 | 1.58 | 0.68 |
| A_51_P498205 | NM_008402  | Itgav    | 16410  | integrin alpha V                                           | 3.78 | 1.58 | 0.25 |
| A_52_P267564 | NM_172728  | Creb5    | 231991 | cAMP responsive element binding protein 5                  | 3.30 | 1.58 | 0.50 |
| A_51_P113722 | NM_133940  | Fbxl14   | 101358 | F-box and leucine-rich repeat protein 14                   | 3.87 | 1.58 | 0.20 |
| A_51_P378550 | NM_153122  | Oplah    | 75475  | 5-oxoprolinase (ATP-hydrolysing)                           | 3.86 | 1.58 | 0.22 |
| A_52_P571661 | NM_025811  | Nhlrc2   | 66866  | NHL repeat containing 2                                    | 3.03 | 1.58 | 0.79 |

|              |            |                 |        |                                                               |      |      |      |
|--------------|------------|-----------------|--------|---------------------------------------------------------------|------|------|------|
| A_51_P486828 | AK173328   | C230081A1244895 |        | RIKEN cDNA C230081A13 gene                                    | 3.03 | 1.58 | 0.79 |
| A_52_P349467 | AK051339   | Tmlhe           | 192289 | trimethyllysine hydroxylase, epsilon                          | 4.32 | 1.58 | 0.11 |
| A_52_P557477 | AK129111   | Zfp609          | 214812 | zinc finger protein 609                                       | 3.25 | 1.58 | 0.55 |
| A_51_P396385 | NM_175439  | Mars2           | 212679 | methionine-tRNA synthetase 2 (mitochondrial)                  | 3.31 | 1.57 | 0.49 |
| A_51_P404110 | NM_0010771 | Fmnl1           | 57778  | formin-like 1                                                 | 3.12 | 1.57 | 0.70 |
| A_51_P284466 | NM_023910  | Tsc22d4         | 78829  | TSC22 domain family, member 4                                 | 3.57 | 1.57 | 0.33 |
| A_52_P396498 | NM_010587  | Itsn1           | 16443  | intersectin 1 (SH3 domain protein 1A)                         | 2.95 | 1.57 | 0.92 |
| A_51_P404339 | NM_025588  | Exoc2           | 66482  | exocyst complex component 2                                   | 2.90 | 1.57 | 0.99 |
| A_51_P436719 | NM_011431  | Eftud2          | 20624  | elongation factor Tu GTP binding domain containing 2          | 3.73 | 1.57 | 0.26 |
| A_52_P493882 | AK088929   | NA              | NA     | NA                                                            | 3.05 | 1.57 | 0.76 |
| A_51_P230878 | U83902     | Mad2l1          | 56150  | MAD2 mitotic arrest deficient-like 1 (yeast)                  | 4.05 | 1.57 | 0.16 |
| A_51_P164270 | NM_021336  | Snrpa1          | 68981  | small nuclear ribonucleoprotein polypeptide A'                | 7.26 | 1.57 | 0.00 |
| A_51_P483839 | NM_016706  | Coil            | 12812  | coilin                                                        | 3.14 | 1.57 | 0.67 |
| A_52_P589119 | NM_197981  | 5930416119      | 72440  | RIKEN cDNA 5930416119 gene                                    | 5.14 | 1.57 | 0.00 |
| A_51_P373619 | NM_010775  | Mbl1            | 17194  | mannose-binding lectin (protein A) 1                          | 3.17 | 1.57 | 0.63 |
| A_52_P27576  | AK050247   | Stxbp3a         | 20912  | syntaxin binding protein 3A                                   | 3.45 | 1.57 | 0.40 |
| A_52_P564962 | NA         | NA              | NA     | NA                                                            | 3.90 | 1.57 | 0.21 |
| A_51_P192589 | NM_025443  | Pno1            | 66249  | partner of NOB1 homolog ( <i>S. cerevisiae</i> )              | 2.92 | 1.56 | 0.96 |
| A_51_P298946 | NM_019770  | Tmed2           | 56334  | transmembrane emp24 domain trafficking protein 2              | 3.59 | 1.56 | 0.32 |
| A_52_P308448 | AK008026   | Vps53           | 68299  | vacuolar protein sorting 53 (yeast)                           | 3.05 | 1.56 | 0.76 |
| A_52_P252007 | NA         | NA              | NA     | NA                                                            | 3.22 | 1.56 | 0.58 |
| A_52_P651078 | NM_027226  | Fyttd1          | 69823  | forty-two-three domain containing 1                           | 3.04 | 1.56 | 0.78 |
| A_51_P267159 | AK035942   | 9030625N01      | 74542  | RIKEN cDNA 9030625N01 gene                                    | 3.67 | 1.56 | 0.29 |
| A_51_P256202 | NM_022325  | Ctsz            | 64138  | cathepsin Z                                                   | 3.81 | 1.56 | 0.24 |
| A_51_P295037 | NA         | NA              | NA     | NA                                                            | 3.03 | 1.56 | 0.79 |
| A_52_P249611 | NM_021313  | Rnf25           | 57751  | ring finger protein 25                                        | 4.28 | 1.56 | 0.10 |
| A_51_P379710 | NM_133933  | Rpn1            | 103963 | ribophorin I                                                  | 3.48 | 1.56 | 0.39 |
| A_51_P139848 | NM_011712  | Wbp5            | 22381  | WW domain binding protein 5                                   | 2.97 | 1.56 | 0.89 |
| A_51_P185775 | NM_028873  | Dnajc14         | 74330  | Dnaj (Hsp40) homolog, subfamily C, member 14                  | 3.43 | 1.55 | 0.40 |
| A_51_P284597 | NM_027013  | Scnm1           | 69269  | sodium channel modifier 1                                     | 2.98 | 1.55 | 0.87 |
| A_52_P662873 | NM_011182  | Cyth3           | 19159  | cytohesin 3                                                   | 3.47 | 1.55 | 0.39 |
| A_51_P195023 | NM_144886  | Exosc2          | 227715 | exosome component 2                                           | 3.52 | 1.55 | 0.35 |
| A_51_P371993 | NM_026775  | Tmed10          | 68581  | transmembrane emp24-like trafficking protein 10 (yeast)       | 3.16 | 1.55 | 0.65 |
| A_52_P550185 | NM_026615  | Urm1            | 68205  | ubiquitin related modifier 1 homolog ( <i>S. cerevisiae</i> ) | 3.02 | 1.55 | 0.79 |

|              |           |           |        |                                                           |      |      |      |
|--------------|-----------|-----------|--------|-----------------------------------------------------------|------|------|------|
| A_52_P362466 | AK019130  | Med20     | 56771  | mediator complex subunit 20                               | 3.02 | 1.55 | 0.79 |
| A_52_P368650 | NM_172503 | Zswim4    | 212168 | zinc finger, SWIM domain containing 4                     | 3.46 | 1.55 | 0.40 |
| A_52_P403527 | NA        | NA        | NA     | NA                                                        | 3.07 | 1.55 | 0.74 |
| A_51_P388432 | NM_130889 | Anp32b    | 67628  | acidic (leucine-rich) nuclear phosphoprotein 32 family, m | 3.96 | 1.55 | 0.17 |
| A_52_P273177 | NM_008448 | Kif5b     | 16573  | kinesin family member 5B                                  | 3.77 | 1.55 | 0.25 |
| A_51_P235548 | NM_177594 | Mtmt9     | 210376 | myotubularin related protein 9                            | 4.17 | 1.55 | 0.12 |
| A_51_P436534 | NM_008971 | Twf1      | 19230  | twinfilin, actin-binding protein, homolog 1 (Drosophila)  | 3.66 | 1.54 | 0.28 |
| A_51_P507844 | NM_027133 | Lnp       | 69605  | limb and neural patterns                                  | 4.03 | 1.54 | 0.16 |
| A_51_P216758 | NM_021529 | Ppp2r3c   | 59032  | protein phosphatase 2, regulatory subunit B'', gamma      | 4.73 | 1.54 | 0.06 |
| A_52_P473140 | AK156842  | Zfp236    | 329002 | zinc finger protein 236                                   | 3.33 | 1.54 | 0.49 |
| A_51_P435891 | NM_020618 | Smarce1   | 57376  | SWI/SNF related, matrix associated, actin dependent regi  | 2.90 | 1.54 | 0.99 |
| A_51_P161315 | XM_127223 | 4930448F1 | 73992  | RIKEN cDNA 4930448F12 gene                                | 4.15 | 1.54 | 0.15 |
| A_51_P115197 | NM_010833 | Msn       | 17698  | moesin                                                    | 4.37 | 1.54 | 0.11 |
| A_52_P378406 | NM_025517 | Rtcd1     | 66368  | RNA terminal phosphate cyclase domain 1                   | 4.38 | 1.54 | 0.12 |
| A_51_P267634 | NM_178751 | Orai2     | 269717 | ORAI calcium release-activated calcium modulator 2        | 3.80 | 1.54 | 0.23 |
| A_52_P174014 | NA        | NA        | NA     | NA                                                        | 3.12 | 1.54 | 0.70 |
| A_51_P429372 | NM_029669 | Dnajc18   | 76594  | DnaJ (Hsp40) homolog, subfamily C, member 18              | 3.07 | 1.54 | 0.74 |
| A_51_P155018 | NM_022887 | Tsc1      | 64930  | tuberous sclerosis 1                                      | 3.05 | 1.54 | 0.76 |
| A_51_P211943 | NM_023742 | Dtx2      | 74198  | deltex 2 homolog (Drosophila)                             | 2.89 | 1.54 | 1.02 |
| A_52_P153154 | AK005757  | 4732416N1 | 320737 | RIKEN cDNA 4732416N19 gene                                | 3.95 | 1.54 | 0.17 |
| A_52_P611589 | NM_021518 | Rab2a     | 59021  | RAB2A, member RAS oncogene family                         | 3.38 | 1.54 | 0.44 |
| A_52_P329825 | NM_011877 | Ptpn21    | 24000  | protein tyrosine phosphatase, non-receptor type 21        | 2.91 | 1.54 | 0.98 |
| A_51_P273489 | AK133473  | Acap1     | 216859 | ArfGAP with coiled-coil, ankyrin repeat and PH domains 1  | 5.48 | 1.54 | 0.00 |
| A_52_P430934 | NM_033623 | Dcun1d1   | 114893 | DCN1, defective in cullin neddylation 1, domain containir | 3.54 | 1.54 | 0.34 |
| A_52_P682450 | NM_016766 | Mcrs1     | 51812  | microspherule protein 1                                   | 3.60 | 1.53 | 0.32 |
| A_51_P474454 | NM_026001 | Rnaseh2b  | 67153  | ribonuclease H2, subunit B                                | 3.18 | 1.53 | 0.62 |
| A_52_P305073 | NM_019663 | Pias1     | 56469  | protein inhibitor of activated STAT 1                     | 3.37 | 1.53 | 0.45 |
| A_52_P520742 | BC040811  | Rbm28     | 68272  | RNA binding motif protein 28                              | 3.24 | 1.53 | 0.56 |
| A_51_P497985 | NM_013484 | C2        | 12263  | complement component 2 (within H-2S)                      | 2.95 | 1.53 | 0.92 |
| A_52_P647408 | AK050859  | Gspt2     | 14853  | G1 to S phase transition 2                                | 3.09 | 1.53 | 0.71 |
| A_51_P201276 | NM_145455 | Btf3      | 218490 | basic transcription factor 3                              | 3.28 | 1.53 | 0.53 |
| A_52_P394652 | NM_011445 | Sox6      | 20679  | SRY-box containing gene 6                                 | 3.13 | 1.53 | 0.68 |
| A_52_P288312 | NA        | NA        | NA     | NA                                                        | 3.49 | 1.53 | 0.38 |
| A_52_P173860 | NM_177673 | BC046331  | 230967 | cDNA sequence BC046331                                    | 3.54 | 1.53 | 0.34 |

|              |            |                 |        |                                                           |      |      |      |
|--------------|------------|-----------------|--------|-----------------------------------------------------------|------|------|------|
| A_52_P226348 | AK089514   | F730043M:320046 |        | RIKEN cDNA F730043M19 gene                                | 4.37 | 1.53 | 0.11 |
| A_52_P100199 | NM_172511  | Abhd10          | 213012 | abhydrolase domain containing 10                          | 3.01 | 1.53 | 0.82 |
| A_51_P415225 | NM_009544  | Zfp105          | 22646  | zinc finger protein 105                                   | 3.74 | 1.53 | 0.26 |
| A_51_P462746 | AK132870   | Tex10           | 269536 | testis expressed gene 10                                  | 3.24 | 1.53 | 0.56 |
| A_51_P191199 | NM_001048: | Gypc            | 71683  | glycophorin C                                             | 3.07 | 1.53 | 0.72 |
| A_51_P122723 | NM_024478  | Grpel1          | 17713  | GrpE-like 1, mitochondrial                                | 3.10 | 1.53 | 0.70 |
| A_51_P355802 | NM_175445  | Rassf2          | 215653 | Ras association (RalGDS/AF-6) domain family member 2      | 3.62 | 1.53 | 0.31 |
| A_52_P39765  | NM_053204  | Erc1            | 111173 | ELKS/RAB6-interacting/CAST family member 1                | 3.34 | 1.53 | 0.48 |
| A_52_P139016 | NM_028718  | Traf3ip1        | 74019  | TRAF3 interacting protein 1                               | 3.57 | 1.53 | 0.33 |
| A_52_P279852 | AK081551   | Mrpl52          | 68836  | mitochondrial ribosomal protein L52                       | 3.09 | 1.53 | 0.71 |
| A_52_P309364 | NM_178684  | Mapk1ip1l       | 218975 | mitogen-activated protein kinase 1 interacting protein 1- | 2.95 | 1.53 | 0.92 |
| A_52_P279068 | NM_026367  | Gpatch2         | 67769  | G patch domain containing 2                               | 3.03 | 1.53 | 0.79 |
| A_52_P123485 | NM_025804  | Tcf25           | 66855  | transcription factor 25 (basic helix-loop-helix)          | 3.23 | 1.53 | 0.58 |
| A_52_P81677  | NA         | NA              | NA     | NA                                                        | 3.68 | 1.53 | 0.29 |
| A_51_P135423 | NM_001037: | Capzb           | 12345  | capping protein (actin filament) muscle Z-line, beta      | 4.54 | 1.52 | 0.09 |
| A_51_P278519 | NM_023268  | Qsox1           | 104009 | quiescin Q6 sulfhydryl oxidase 1                          | 3.07 | 1.52 | 0.74 |
| A_51_P242101 | NM_028137  | 5730528L1       | 66665  | RIKEN cDNA 5730528L13 gene                                | 3.86 | 1.52 | 0.22 |
| A_51_P169516 | XM_141580  | Ppp1r3d         | 228966 | protein phosphatase 1, regulatory subunit 3D              | 2.96 | 1.52 | 0.91 |
| A_51_P255613 | BC100499   | Snrpf           | 69878  | small nuclear ribonucleoprotein polypeptide F             | 2.93 | 1.52 | 0.96 |
| A_52_P432153 | NM_207633  | Yipf6           | 77929  | Yip1 domain family, member 6                              | 3.97 | 1.52 | 0.17 |
| A_52_P538950 | AK046316   | B230369F2       | 320110 | RIKEN cDNA B230369F24 gene                                | 4.22 | 1.52 | 0.13 |
| A_51_P349166 | NM_175465  | Sestd1          | 228071 | SEC14 and spectrin domains 1                              | 3.21 | 1.52 | 0.59 |
| A_52_P45563  | NM_030710  | Slamf6          | 30925  | SLAM family member 6                                      | 3.19 | 1.52 | 0.62 |
| A_52_P176634 | NM_001001: | Taf9b           | 407786 | TAF9B RNA polymerase II, TATA box binding protein (TBP    | 5.45 | 1.52 | 0.00 |
| A_52_P647900 | AK171223   | Arhgef2         | 16800  | rho/rac guanine nucleotide exchange factor (GEF) 2        | 4.66 | 1.52 | 0.05 |
| A_52_P527874 | NM_199447  | Rrp12           | 107094 | ribosomal RNA processing 12 homolog (S. cerevisiae)       | 3.10 | 1.52 | 0.70 |
| A_51_P214796 | NM_199196  | Suz12           | 52615  | suppressor of zeste 12 homolog (Drosophila)               | 3.22 | 1.52 | 0.58 |
| A_52_P27694  | NM_027419  | 2810408A1       | 70419  | RIKEN cDNA 2810408A11 gene                                | 3.50 | 1.52 | 0.36 |
| A_52_P40168  | NA         | NA              | NA     | NA                                                        | 3.83 | 1.52 | 0.23 |
| A_52_P454183 | NM_177068  | Olfml2b         | 320078 | olfactomedin-like 2B                                      | 2.94 | 1.52 | 0.93 |
| A_52_P436621 | NM_009077  | Rpl18           | 19899  | ribosomal protein L18                                     | 3.14 | 1.51 | 0.67 |
| A_51_P493012 | NM_178628  | Atl1            | 73991  | atlastin GTPase 1                                         | 3.30 | 1.51 | 0.52 |
| A_51_P123724 | AI842957   | NA              | NA     | NA                                                        | 3.26 | 1.51 | 0.53 |
| A_52_P270949 | NM_175102  | Sf3b5           | 66125  | splicing factor 3b, subunit 5                             | 3.99 | 1.51 | 0.18 |

|              |           |         |        |                                                                 |      |      |      |
|--------------|-----------|---------|--------|-----------------------------------------------------------------|------|------|------|
| A_51_P295206 | NM_178309 | Brip1   | 237911 | BRCA1 interacting protein C-terminal helicase 1                 | 3.79 | 1.51 | 0.25 |
| A_51_P230873 | NM_019499 | Mad2l1  | 56150  | MAD2 mitotic arrest deficient-like 1 (yeast)                    | 3.88 | 1.51 | 0.21 |
| A_52_P489729 | NM_016906 | Sec61a1 | 53421  | Sec61 alpha 1 subunit ( <i>S. cerevisiae</i> )                  | 2.98 | 1.51 | 0.87 |
| A_51_P304076 | NM_176958 | Hif1an  | 319594 | hypoxia-inducible factor 1, alpha subunit inhibitor             | 5.41 | 1.51 | 0.00 |
| A_51_P313711 | NM_022410 | Myh9    | 17886  | myosin, heavy polypeptide 9, non-muscle                         | 4.07 | 1.51 | 0.16 |
| A_51_P143152 | NM_024452 | Luzp1   | 269593 | leucine zipper protein 1                                        | 3.26 | 1.51 | 0.53 |
| A_52_P421918 | AK050769  | Helq    | 191578 | helicase, POLQ-like                                             | 3.35 | 1.51 | 0.46 |
| A_51_P337944 | NM_080708 | Bmp2k   | 140780 | BMP2 inducible kinase                                           | 3.53 | 1.51 | 0.34 |
| A_51_P233364 | NA        | NA      | NA     | NA                                                              | 2.92 | 1.51 | 0.96 |
| A_51_P373369 | NM_026119 | Med4    | 67381  | mediator of RNA polymerase II transcription, subunit 4 h        | 2.93 | 1.51 | 0.95 |
| A_52_P139478 | NM_025431 | Llph    | 66225  | LLP homolog, long-term synaptic facilitation ( <i>Aplysia</i> ) | 3.53 | 1.50 | 0.34 |
| A_52_P547000 | XM_892996 | NA      | NA     | NA                                                              | 3.72 | 1.50 | 0.27 |
| A_51_P197378 | NM_026217 | Atg12   | 67526  | autophagy-related 12 (yeast)                                    | 2.97 | 1.50 | 0.89 |
| A_51_P225083 | NM_153680 | Snx17   | 266781 | sorting nexin 17                                                | 4.04 | 1.50 | 0.16 |
| A_52_P650011 | AK041964  | Elk4    | 13714  | ELK4, member of ETS oncogene family                             | 3.24 | 1.50 | 0.56 |
| A_51_P341066 | NM_001029 | Sla     | 20491  | src-like adaptor                                                | 3.99 | 1.50 | 0.18 |
| A_51_P518246 | NM_021438 | Fibp    | 58249  | fibroblast growth factor (acidic) intracellular binding prot    | 4.27 | 1.50 | 0.10 |
| A_52_P490263 | NM_013819 | H2-M3   | 14991  | histocompatibility 2, M region locus 3                          | 4.02 | 1.50 | 0.18 |
| A_52_P58006  | NM_133225 | Acbd3   | 170760 | acyl-Coenzyme A binding domain containing 3                     | 3.03 | 1.50 | 0.79 |
| A_52_P683957 | NM_145985 | Arcn1   | 213827 | archain 1                                                       | 3.86 | 1.50 | 0.22 |
| A_52_P314042 | NM_012010 | Eif2s3x | 26905  | eukaryotic translation initiation factor 2, subunit 3, struct   | 3.03 | 1.50 | 0.79 |
| A_52_P531184 | AK009586  | Vps53   | 68299  | vacuolar protein sorting 53 (yeast)                             | 3.11 | 1.50 | 0.70 |
| A_51_P498023 | NM_023912 | Scyl1   | 78891  | SCY1-like 1 ( <i>S. cerevisiae</i> )                            | 4.03 | 1.49 | 0.16 |
| A_51_P168412 | M73329    | Pdia3   | 14827  | protein disulfide isomerase associated 3                        | 2.92 | 1.49 | 0.96 |
| A_52_P655578 | NM_023314 | Eif4e2  | 26987  | eukaryotic translation initiation factor 4E member 2            | 2.89 | 1.49 | 1.02 |
| A_52_P541344 | NM_018729 | Cd244   | 18106  | CD244 natural killer cell receptor 2B4                          | 5.15 | 1.49 | 0.00 |
| A_51_P235909 | NM_026888 | Phkg2   | 68961  | phosphorylase kinase, gamma 2 (testis)                          | 4.05 | 1.49 | 0.16 |
| A_51_P306527 | NM_011738 | Ywhah   | 22629  | tyrosine 3-monooxygenase/tryptophan 5-monooxygenas              | 5.67 | 1.49 | 0.00 |
| A_51_P437247 | NM_001040 | Arap1   | 69710  | ArfGAP with RhoGAP domain, ankyrin repeat and PH don            | 3.98 | 1.49 | 0.17 |
| A_52_P472958 | NM_144826 | Utp6    | 216987 | UTP6, small subunit (SSU) processome component, homc            | 2.98 | 1.49 | 0.87 |
| A_51_P281806 | XM_618787 | NA      | NA     | NA                                                              | 3.01 | 1.49 | 0.82 |
| A_52_P155302 | NM_001003 | Ankib1  | 70797  | ankyrin repeat and IBR domain containing 1                      | 3.36 | 1.49 | 0.46 |
| A_52_P254275 | NM_144515 | Zfp52   | 22710  | zinc finger protein 52                                          | 2.99 | 1.49 | 0.85 |
| A_51_P297165 | BC092058  | Sf3a3   | 75062  | splicing factor 3a, subunit 3                                   | 3.79 | 1.49 | 0.25 |



|              |           |           |        |                                                            |      |      |      |
|--------------|-----------|-----------|--------|------------------------------------------------------------|------|------|------|
| A_51_P249227 | NM_008972 | Ptma      | 19231  | prothymosin alpha                                          | 3.18 | 1.49 | 0.62 |
| A_51_P113222 | NM_027270 | Exoc1     | 69940  | exocyst complex component 1                                | 3.30 | 1.49 | 0.52 |
| A_52_P18236  | NM_011093 | Pira6     | 18729  | paired-Ig-like receptor A6                                 | 3.03 | 1.49 | 0.79 |
| A_52_P740926 | AV121721  | NA        | NA     | NA                                                         | 3.19 | 1.49 | 0.60 |
| A_51_P308275 | NM_011026 | P2rx4     | 18438  | purinergic receptor P2X, ligand-gated ion channel 4        | 3.10 | 1.49 | 0.70 |
| A_52_P620345 | NM_133979 | Ano10     | 102566 | anoctamin 10                                               | 4.90 | 1.49 | 0.07 |
| A_52_P557837 | NA        | NA        | NA     | NA                                                         | 3.24 | 1.49 | 0.56 |
| A_51_P472888 | NM_198299 | E130303B0 | 102124 | RIKEN cDNA E130303B06 gene                                 | 3.41 | 1.49 | 0.43 |
| A_51_P399960 | NM_027422 | Mier2     | 70427  | mesoderm induction early response 1, family member 2       | 4.05 | 1.48 | 0.16 |
| A_51_P463497 | NM_145135 | Rnh1      | 107702 | ribonuclease/angiogenin inhibitor 1                        | 3.17 | 1.48 | 0.63 |
| A_52_P393755 | NM_010718 | Limk2     | 16886  | LIM motif-containing protein kinase 2                      | 3.23 | 1.48 | 0.56 |
| A_51_P350222 | NM_001013 | Dync1li2  | 234663 | dynein, cytoplasmic 1 light intermediate chain 2           | 3.41 | 1.48 | 0.42 |
| A_52_P32662  | AK033187  | Zfp277    | 246196 | zinc finger protein 277                                    | 3.18 | 1.48 | 0.62 |
| A_51_P338664 | NM_030082 | Hist3h2ba | 78303  | histone cluster 3, H2ba                                    | 6.24 | 1.48 | 0.00 |
| A_52_P373798 | NM_026917 | Zdhhc3    | 69035  | zinc finger, DHHC domain containing 3                      | 2.94 | 1.48 | 0.93 |
| A_52_P502032 | NM_198018 | Abr       | 109934 | active BCR-related gene                                    | 4.54 | 1.48 | 0.09 |
| A_51_P239884 | NM_172865 | Manea     | 242362 | mannosidase, endo-alpha                                    | 3.08 | 1.48 | 0.72 |
| A_52_P493322 | NM_177899 | D330038O  | 330788 | RIKEN cDNA D330038O06 gene                                 | 5.63 | 1.48 | 0.00 |
| A_52_P258291 | NM_011808 | Ets1      | 23871  | E26 avian leukemia oncogene 1, 5' domain                   | 3.20 | 1.48 | 0.59 |
| A_52_P549927 | NM_027472 | 5730455P1 | 70591  | RIKEN cDNA 5730455P16 gene                                 | 3.43 | 1.48 | 0.40 |
| A_52_P93422  | NM_172549 | Cabin1    | 104248 | calcineurin binding protein 1                              | 3.41 | 1.48 | 0.42 |
| A_51_P484880 | NM_207680 | Bcl2l11   | 12125  | BCL2-like 11 (apoptosis facilitator)                       | 2.99 | 1.47 | 0.85 |
| A_52_P402305 | NM_007589 | Calm2     | 12314  | calmodulin 2                                               | 3.08 | 1.47 | 0.72 |
| A_52_P470586 | NA        | NA        | NA     | NA                                                         | 4.61 | 1.47 | 0.05 |
| A_52_P358349 | NM_026002 | Mtdh      | 67154  | metadherin                                                 | 2.94 | 1.47 | 0.93 |
| A_52_P552971 | NM_001007 | Tceanc    | 245695 | transcription elongation factor A (SII) N-terminal and cen | 3.02 | 1.47 | 0.81 |
| A_52_P585124 | NM_009911 | Cxcr4     | 12767  | chemokine (C-X-C motif) receptor 4                         | 3.66 | 1.47 | 0.28 |
| A_52_P476731 | NM_027828 | Fam110c   | 104943 | family with sequence similarity 110, member C              | 2.97 | 1.47 | 0.89 |
| A_51_P127777 | NM_018740 | Rai12     | 54351  | retinoic acid induced 12                                   | 3.32 | 1.47 | 0.49 |
| A_52_P615010 | NM_027420 | 2610034B1 | 70420  | RIKEN cDNA 2610034B18 gene                                 | 2.95 | 1.47 | 0.92 |
| A_51_P205953 | NM_010448 | Hnrnpab   | 15384  | heterogeneous nuclear ribonucleoprotein A/B                | 2.94 | 1.47 | 0.95 |
| A_52_P311841 | NM_001033 | Mef2a     | 17258  | myocyte enhancer factor 2A                                 | 2.91 | 1.47 | 0.99 |
| A_51_P344364 | NM_030175 | Hhipl2    | 78772  | hedgehog interacting protein-like 2                        | 2.92 | 1.47 | 0.96 |
| A_51_P310821 | NM_010453 | Hoxa5     | 15402  | homeobox A5                                                | 3.17 | 1.47 | 0.63 |

|              |           |           |        |                                                           |      |      |      |
|--------------|-----------|-----------|--------|-----------------------------------------------------------|------|------|------|
| A_52_P679205 | NM_175675 | 4930471M  | 74919  | RIKEN cDNA 4930471M23 gene                                | 3.04 | 1.46 | 0.78 |
| A_52_P160936 | BC004616  | Gusb      | 110006 | glucuronidase, beta                                       | 3.90 | 1.46 | 0.21 |
| A_51_P365964 | NM_144884 | Tor1a     | 30931  | torsin family 1, member A (torsin A)                      | 3.41 | 1.46 | 0.43 |
| A_51_P442118 | NM_001039 | Gm6583    | 625424 | predicted gene 6583                                       | 3.35 | 1.46 | 0.46 |
| A_52_P228398 | NM_033561 | Eif4h     | 22384  | eukaryotic translation initiation factor 4H               | 3.73 | 1.46 | 0.26 |
| A_52_P426863 | NM_178643 | C230052I1 | 101831 | RIKEN cDNA C230052I12 gene                                | 3.80 | 1.46 | 0.23 |
| A_51_P193475 | NM_176841 | Ccdc88a   | 108686 | coiled coil domain containing 88A                         | 4.27 | 1.46 | 0.10 |
| A_52_P265889 | NM_009119 | Sap18     | 20220  | Sin3-associated polypeptide 18                            | 3.03 | 1.46 | 0.79 |
| A_52_P523473 | NM_172487 | Prrt3     | 210673 | proline-rich transmembrane protein 3                      | 3.02 | 1.46 | 0.79 |
| A_51_P349673 | NM_021411 | Rab37     | 58222  | RAB37, member of RAS oncogene family                      | 5.46 | 1.45 | 0.00 |
| A_52_P521710 | NM_172254 | Dph3      | 105638 | DPH3 homolog (KT111, <i>S. cerevisiae</i> )               | 3.03 | 1.45 | 0.79 |
| A_51_P356602 | NM_199022 | Shc4      | 271849 | SHC (Src homology 2 domain containing) family, member     | 3.61 | 1.45 | 0.31 |
| A_51_P503345 | NM_022986 | Irak1bp1  | 65099  | interleukin-1 receptor-associated kinase 1 binding protei | 3.66 | 1.45 | 0.28 |
| A_51_P123625 | AK152177  | Irg1      | 16365  | immunoresponsive gene 1                                   | 3.22 | 1.45 | 0.58 |
| A_52_P586574 | NM_007475 | Rplp0     | 11837  | ribosomal protein, large, P0                              | 3.18 | 1.45 | 0.62 |
| A_51_P438363 | NM_172703 | Eif4g3    | 230861 | eukaryotic translation initiation factor 4 gamma, 3       | 3.83 | 1.45 | 0.24 |
| A_52_P273769 | NM_025614 | Rwdd1     | 66521  | RWD domain containing 1                                   | 3.25 | 1.45 | 0.56 |
| A_52_P302203 | NM_199196 | Suz12     | 52615  | suppressor of zeste 12 homolog ( <i>Drosophila</i> )      | 2.95 | 1.44 | 0.92 |
| A_52_P400584 | NM_028137 | 5730528L1 | 66665  | RIKEN cDNA 5730528L13 gene                                | 4.21 | 1.44 | 0.13 |
| A_51_P278070 | BE980334  | NA        | NA     | NA                                                        | 2.98 | 1.44 | 0.89 |
| A_51_P249414 | NM_022408 | Dgcr14    | 27886  | DiGeorge syndrome critical region gene 14                 | 3.62 | 1.44 | 0.31 |
| A_52_P231170 | NM_172694 | Megf9     | 230316 | multiple EGF-like-domains 9                               | 3.44 | 1.44 | 0.40 |
| A_52_P685857 | XM_899890 | NA        | NA     | NA                                                        | 2.91 | 1.44 | 0.98 |
| A_51_P415162 | NM_009078 | Rpl19     | 19921  | ribosomal protein L19                                     | 3.80 | 1.44 | 0.23 |
| A_51_P170619 | NM_028041 | Ddx54     | 71990  | DEAD (Asp-Glu-Ala-Asp) box polypeptide 54                 | 3.10 | 1.44 | 0.70 |
| A_52_P265524 | NM_011026 | P2rx4     | 18438  | purinergic receptor P2X, ligand-gated ion channel 4       | 3.41 | 1.44 | 0.43 |
| A_52_P579726 | NM_026217 | Atg12     | 67526  | autophagy-related 12 (yeast)                              | 3.66 | 1.43 | 0.28 |
| A_52_P237176 | NM_178260 | Kiss1     | 280287 | KISS-1 metastasis-suppressor                              | 2.94 | 1.43 | 0.93 |
| A_51_P335146 | NM_010400 | H60a      | 15101  | histocompatibility 60a                                    | 4.35 | 1.43 | 0.11 |
| A_51_P116419 | NM_013790 | Abcc5     | 27416  | ATP-binding cassette, sub-family C (CFTR/MRP), member     | 3.08 | 1.43 | 0.72 |
| A_51_P120859 | NM_008640 | Laptm4a   | 17775  | lysosomal-associated protein transmembrane 4A             | 3.33 | 1.43 | 0.49 |
| A_51_P284166 | NM_021552 | Nsa2      | 59050  | NSA2 ribosome biogenesis homolog ( <i>S. cerevisiae</i> ) | 3.04 | 1.43 | 0.78 |
| A_52_P201482 | AK020123  | Prickle2  | 243548 | prickle homolog 2 ( <i>Drosophila</i> )                   | 3.57 | 1.43 | 0.33 |
| A_51_P324524 | NM_029755 | Calcoco2  | 76815  | calcium binding and coiled-coil domain 2                  | 3.06 | 1.43 | 0.75 |

|              |           |         |        |                                                           |      |      |      |
|--------------|-----------|---------|--------|-----------------------------------------------------------|------|------|------|
| A_51_P235580 | NM_022994 | Dap3    | 65111  | death associated protein 3                                | 3.57 | 1.43 | 0.33 |
| A_51_P332900 | NM_021420 | Stk4    | 58231  | serine/threonine kinase 4                                 | 3.14 | 1.43 | 0.67 |
| A_51_P420841 | AK054249  | Lrrc8b  | 433926 | leucine rich repeat containing 8 family, member B         | 3.73 | 1.42 | 0.26 |
| A_51_P164686 | BC031452  | Rrbp1   | 81910  | ribosome binding protein 1                                | 6.76 | 1.42 | 0.00 |
| A_51_P246076 | NM_026283 | Samd8   | 67630  | sterile alpha motif domain containing 8                   | 3.98 | 1.42 | 0.17 |
| A_52_P363087 | NM_011692 | Vbp1    | 22327  | von Hippel-Lindau binding protein 1                       | 4.21 | 1.42 | 0.13 |
| A_51_P439299 | NM_177073 | Relt    | 320100 | RELT tumor necrosis factor receptor                       | 5.19 | 1.42 | 0.00 |
| A_52_P469512 | NM_026000 | Psmd9   | 67151  | proteasome (prosome, macropain) 26S subunit, non-ATP      | 3.81 | 1.42 | 0.24 |
| A_52_P117197 | NM_027497 | Epc1    | 13831  | enhancer of polycomb homolog 1 (Drosophila)               | 3.41 | 1.42 | 0.43 |
| A_52_P313813 | NM_026631 | Nhp2    | 52530  | NHP2 ribonucleoprotein homolog (yeast)                    | 3.61 | 1.42 | 0.31 |
| A_52_P407602 | NA        | NA      | NA     | NA                                                        | 3.87 | 1.42 | 0.20 |
| A_52_P454397 | NM_019689 | Arid3b  | 56380  | AT rich interactive domain 3B (BRIGHT-like)               | 3.75 | 1.42 | 0.26 |
| A_52_P138895 | NM_153559 | Qsox2   | 227638 | quiescin Q6 sulfhydryl oxidase 2                          | 3.50 | 1.42 | 0.36 |
| A_52_P468472 | NM_007471 | App     | 11820  | amyloid beta (A4) precursor protein                       | 3.57 | 1.41 | 0.33 |
| A_51_P431903 | NM_011051 | Pdcd6   | 18570  | programmed cell death 6                                   | 3.08 | 1.41 | 0.71 |
| A_51_P411355 | NM_021441 | Taf1c   | 21341  | TATA box binding protein (Tbp)-associated factor, RNA p   | 3.41 | 1.41 | 0.43 |
| A_52_P637689 | NM_033524 | Spred1  | 114715 | sprouty protein with EVH-1 domain 1, related sequence     | 3.28 | 1.41 | 0.53 |
| A_52_P83386  | NM_028932 | Eaf1    | 74427  | ELL associated factor 1                                   | 3.15 | 1.41 | 0.66 |
| A_51_P251293 | NM_145534 | Btbd3   | 228662 | BTB (POZ) domain containing 3                             | 3.05 | 1.41 | 0.76 |
| A_52_P597696 | NM_008697 | Nin     | 18080  | ninein                                                    | 3.22 | 1.41 | 0.58 |
| A_52_P673971 | NM_009282 | Stag1   | 20842  | stromal antigen 1                                         | 3.34 | 1.41 | 0.47 |
| A_52_P474638 | NM_021420 | Stk4    | 58231  | serine/threonine kinase 4                                 | 2.91 | 1.41 | 0.98 |
| A_52_P174396 | NM_009952 | Creb1   | 12912  | cAMP responsive element binding protein 1                 | 3.28 | 1.41 | 0.53 |
| A_52_P121525 | NM_009261 | Strbp   | 20744  | spermatid perinuclear RNA binding protein                 | 4.00 | 1.41 | 0.18 |
| A_51_P489313 | NM_025618 | Sri     | 109552 | sorcin                                                    | 3.67 | 1.40 | 0.29 |
| A_52_P631514 | AK081249  | Atp5f1  | 11950  | ATP synthase, H+ transporting, mitochondrial F0 comple    | 3.60 | 1.40 | 0.32 |
| A_51_P487718 | NM_010093 | E2f3    | 13557  | E2F transcription factor 3                                | 3.00 | 1.40 | 0.85 |
| A_52_P48546  | NM_026259 | Rnf41   | 67588  | ring finger protein 41                                    | 3.00 | 1.40 | 0.82 |
| A_51_P433338 | NM_053180 | Cdk20   | 105278 | cyclin-dependent kinase 20                                | 2.90 | 1.40 | 1.02 |
| A_51_P123630 | L38281    | Irg1    | 16365  | immunoresponsive gene 1                                   | 3.12 | 1.40 | 0.70 |
| A_51_P217535 | NM_023735 | Actr3   | 74117  | ARP3 actin-related protein 3 homolog (yeast)              | 3.27 | 1.40 | 0.53 |
| A_51_P300216 | NM_022309 | Cbfb    | 12400  | core binding factor beta                                  | 3.17 | 1.40 | 0.63 |
| A_52_P620357 | NM_207706 | Elmo2   | 140579 | engulfment and cell motility 2, ced-12 homolog (C. elegai | 2.94 | 1.40 | 0.93 |
| A_51_P461724 | NM_027439 | Atp6ap2 | 70495  | ATPase, H+ transporting, lysosomal accessory protein 2    | 4.94 | 1.40 | 0.07 |

|              |           |          |        |                                                                   |      |      |      |
|--------------|-----------|----------|--------|-------------------------------------------------------------------|------|------|------|
| A_52_P262096 | NM_029955 | Ccdc93   | 70829  | coiled-coil domain containing 93                                  | 3.16 | 1.39 | 0.65 |
| A_51_P272175 | NM_053161 | Mrpl27   | 94064  | mitochondrial ribosomal protein L27                               | 3.31 | 1.39 | 0.49 |
| A_51_P341324 | NM_019785 | Actr10   | 56444  | ARP10 actin-related protein 10 homolog ( <i>S. cerevisiae</i> )   | 3.07 | 1.39 | 0.74 |
| A_52_P386408 | NM_028312 | Ccdc12   | 72654  | coiled-coil domain containing 12                                  | 3.98 | 1.39 | 0.18 |
| A_51_P424518 | AK014241  | Nin      | 18080  | ninein                                                            | 3.61 | 1.39 | 0.31 |
| A_52_P62444  | AK029181  | Syn2     | 20965  | synapsin II                                                       | 3.14 | 1.39 | 0.67 |
| A_52_P345946 | NA        | NA       | NA     | NA                                                                | 3.45 | 1.39 | 0.40 |
| A_51_P332359 | NM_027213 | Med6     | 69792  | mediator of RNA polymerase II transcription, subunit 6 h          | 3.12 | 1.39 | 0.70 |
| A_51_P145991 | NM_026899 | Ssu72    | 68991  | Ssu72 RNA polymerase II CTD phosphatase homolog ( <i>yea</i>      | 3.06 | 1.39 | 0.75 |
| A_51_P414126 | NM_011226 | Rab19    | 19331  | RAB19, member RAS oncogene family                                 | 3.00 | 1.39 | 0.85 |
| A_52_P386754 | AK038884  | Blcap    | 53619  | bladder cancer associated protein homolog (human)                 | 3.66 | 1.39 | 0.28 |
| A_52_P507890 | NM_019747 | Zfp113   | 56314  | zinc finger protein 113                                           | 3.00 | 1.38 | 0.85 |
| A_52_P143757 | NM_173015 | Mon1b    | 270096 | MON1 homolog b ( <i>yeast</i> )                                   | 3.89 | 1.38 | 0.21 |
| A_51_P424499 | NM_011660 | Txn1     | 22166  | thioredoxin 1                                                     | 3.18 | 1.38 | 0.62 |
| A_51_P190805 | NM_007456 | Ap1m1    | 11767  | adaptor-related protein complex AP-1, mu subunit 1                | 2.91 | 1.38 | 0.98 |
| A_51_P361359 | NM_183142 | Alg11    | 207958 | asparagine-linked glycosylation 11 homolog ( <i>yeast</i> , alpha | 3.19 | 1.38 | 0.62 |
| A_51_P202408 | NM_008967 | Ptgir    | 19222  | prostaglandin I receptor (IP)                                     | 2.99 | 1.38 | 0.85 |
| A_52_P656634 | NM_133933 | Rpn1     | 103963 | ribophorin I                                                      | 2.93 | 1.38 | 0.95 |
| A_52_P633597 | NM_181397 | Rftn1    | 76438  | raftlin lipid raft linker 1                                       | 2.94 | 1.38 | 0.93 |
| A_51_P421984 | NM_019818 | Timm22   | 56322  | translocase of inner mitochondrial membrane 22 homolc             | 3.84 | 1.38 | 0.22 |
| A_52_P480872 | NM_145475 | Cerk     | 223753 | ceramide kinase                                                   | 3.70 | 1.37 | 0.27 |
| A_52_P471471 | NM_198295 | Tmx3     | 67988  | thioredoxin-related transmembrane protein 3                       | 3.23 | 1.37 | 0.58 |
| A_52_P296996 | NM_148929 | Slc9a8   | 77031  | solute carrier family 9 (sodium/hydrogen exchanger), me           | 3.56 | 1.37 | 0.35 |
| A_51_P258620 | NM_029391 | Rab4b    | 19342  | RAB4B, member RAS oncogene family                                 | 4.09 | 1.37 | 0.16 |
| A_51_P183685 | NM_033475 | Rab34    | 19376  | RAB34, member of RAS oncogene family                              | 4.91 | 1.37 | 0.07 |
| A_52_P674530 | NM_010438 | Hk1      | 15275  | hexokinase 1                                                      | 2.98 | 1.37 | 0.87 |
| A_52_P589735 | BC039744  | Acp1     | 11431  | acid phosphatase 1, soluble                                       | 3.52 | 1.37 | 0.35 |
| A_51_P215570 | NM_145577 | Zfp772   | 232855 | zinc finger protein 772                                           | 3.23 | 1.37 | 0.58 |
| A_52_P201015 | NA        | NA       | NA     | NA                                                                | 3.11 | 1.37 | 0.70 |
| A_52_P547021 | NM_009078 | Rpl19    | 19921  | ribosomal protein L19                                             | 3.25 | 1.36 | 0.55 |
| A_52_P491273 | AK046543  | Tet3     | 194388 | tet oncogene family member 3                                      | 3.18 | 1.36 | 0.62 |
| A_51_P400498 | BC079668  | Whsc1    | 107823 | Wolf-Hirschhorn syndrome candidate 1 (human)                      | 3.20 | 1.36 | 0.60 |
| A_52_P340700 | NM_172395 | Cdc42se1 | 57912  | CDC42 small effector 1                                            | 3.02 | 1.36 | 0.81 |
| A_51_P357195 | XM_132740 | NA       | NA     | NA                                                                | 3.01 | 1.36 | 0.82 |

|              |           |         |        |                                                       |      |      |      |
|--------------|-----------|---------|--------|-------------------------------------------------------|------|------|------|
| A_52_P653966 | NM_019426 | Atf7ip  | 54343  | activating transcription factor 7 interacting protein | 3.68 | 1.36 | 0.29 |
| A_52_P348972 | NM_020255 | Scand1  | 19018  | SCAN domain-containing 1                              | 3.61 | 1.36 | 0.31 |
| A_52_P623690 | NA        | NA      | NA     | NA                                                    | 3.09 | 1.36 | 0.71 |
| A_51_P195258 | NM_019426 | Atf7ip  | 54343  | activating transcription factor 7 interacting protein | 4.22 | 1.36 | 0.13 |
| A_52_P680908 | NM_022655 | Ireb2   | 64602  | iron responsive element binding protein 2             | 2.94 | 1.36 | 0.93 |
| A_51_P286878 | AK016577  | Ttll11  | 74410  | tubulin tyrosine ligase-like family, member 11        | 3.00 | 1.36 | 0.85 |
| A_51_P479043 | NM_022988 | Nif3l1  | 65102  | Ngg1 interacting factor 3-like 1 (S. pombe)           | 3.86 | 1.36 | 0.22 |
| A_52_P600547 | NM_009271 | Src     | 20779  | Rous sarcoma oncogene                                 | 3.58 | 1.35 | 0.33 |
| A_52_P835473 | AK052259  | NA      | NA     | NA                                                    | 3.14 | 1.35 | 0.66 |
| A_52_P123268 | NM_001002 | Rpl17   | 319195 | ribosomal protein L17                                 | 3.15 | 1.35 | 0.65 |
| A_51_P174016 | NM_008202 | Slc39a7 | 14977  | solute carrier family 39 (zinc transporter), member 7 | 3.10 | 1.35 | 0.70 |
| A_51_P460633 | NM_008244 | Hgs     | 15239  | HGF-regulated tyrosine kinase substrate               | 3.13 | 1.35 | 0.67 |
| A_52_P301804 | NM_013565 | Itga3   | 16400  | integrin alpha 3                                      | 2.94 | 1.35 | 0.93 |
| A_51_P197321 | NM_016760 | Clta    | 12757  | clathrin, light polypeptide (Lca)                     | 3.25 | 1.35 | 0.56 |
| A_52_P611283 | NM_019573 | Wwox    | 80707  | WW domain-containing oxidoreductase                   | 3.09 | 1.35 | 0.71 |
| A_52_P290579 | NM_001033 | Mef2a   | 17258  | myocyte enhancer factor 2A                            | 3.22 | 1.34 | 0.58 |
| A_52_P86517  | NM_146097 | Cbwd1   | 226043 | COBW domain containing 1                              | 2.98 | 1.34 | 0.87 |
| A_51_P115547 | NM_022813 | Scamp2  | 24044  | secretory carrier membrane protein 2                  | 2.90 | 1.34 | 0.99 |
| A_52_P343343 | NM_025433 | Rpl7l1  | 66229  | ribosomal protein L7-like 1                           | 3.75 | 1.34 | 0.26 |
| A_51_P233788 | NM_023178 | Dmap1   | 66233  | DNA methyltransferase 1-associated protein 1          | 3.47 | 1.34 | 0.39 |
| A_51_P475076 | NM_011692 | Vbp1    | 22327  | von Hippel-Lindau binding protein 1                   | 2.98 | 1.34 | 0.89 |
| A_52_P540302 | NA        | NA      | NA     | NA                                                    | 2.90 | 1.34 | 0.99 |
| A_52_P193322 | NM_023348 | Snap29  | 67474  | synaptosomal-associated protein 29                    | 3.26 | 1.33 | 0.53 |
| A_52_P131584 | AK014260  | Nup54   | 269113 | nucleoporin 54                                        | 4.26 | 1.33 | 0.10 |
| A_51_P335916 | NM_023331 | Mrpl46  | 67308  | mitochondrial ribosomal protein L46                   | 3.25 | 1.33 | 0.55 |
| A_51_P406115 | NM_007399 | Adam10  | 11487  | a disintegrin and metallopeptidase domain 10          | 4.11 | 1.33 | 0.14 |
| A_52_P159885 | NM_001024 | Ddx49   | 234374 | DEAD (Asp-Glu-Ala-Asp) box polypeptide 49             | 3.53 | 1.33 | 0.34 |
| A_52_P1638   | NM_139154 | Rab40c  | 224624 | Rab40c, member RAS oncogene family                    | 2.89 | 1.33 | 1.02 |
| A_51_P264478 | NM_172400 | Dnajc8  | 68598  | Dnaj (Hsp40) homolog, subfamily C, member 8           | 3.77 | 1.32 | 0.25 |
| A_51_P349142 | NM_007991 | Fbl     | 14113  | fibrillarin                                           | 3.18 | 1.32 | 0.62 |
| A_51_P354433 | NM_019489 | Ppie    | 56031  | peptidylprolyl isomerase E (cyclophilin E)            | 3.33 | 1.32 | 0.49 |
| A_51_P232705 | NM_029635 | CommD9  | 76501  | COMM domain containing 9                              | 3.02 | 1.32 | 0.79 |
| A_51_P332003 | NM_025651 | Aste1   | 66595  | asteroid homolog 1 (Drosophila)                       | 2.91 | 1.32 | 0.99 |
| A_52_P50512  | NM_011875 | Psmd13  | 23997  | proteasome (prosome, macropain) 26S subunit, non-ATP  | 3.38 | 1.32 | 0.45 |

|              |            |                 |        |                                                           |      |      |      |
|--------------|------------|-----------------|--------|-----------------------------------------------------------|------|------|------|
| A_52_P649161 | NM_019936  | Cript           | 56724  | cysteine-rich PDZ-binding protein                         | 3.39 | 1.32 | 0.44 |
| A_52_P591791 | NA         | NA              | NA     | NA                                                        | 3.37 | 1.32 | 0.46 |
| A_52_P603654 | NM_018768  | Stx8            | 55943  | syntaxin 8                                                | 3.93 | 1.31 | 0.19 |
| A_51_P158161 | NM_023536  | Mrto4           | 69902  | MRT4, mRNA turnover 4, homolog (S. cerevisiae)            | 3.25 | 1.31 | 0.55 |
| A_52_P48436  | NM_025614  | Rwdd1           | 66521  | RWD domain containing 1                                   | 2.91 | 1.31 | 0.98 |
| A_51_P109496 | NM_027285  | 1700029I0:70005 |        | RIKEN cDNA 1700029I01 gene                                | 3.17 | 1.31 | 0.63 |
| A_51_P442206 | AK029888   | Ankrd42         | 73845  | ankyrin repeat domain 42                                  | 2.89 | 1.31 | 1.02 |
| A_51_P390239 | NM_032396  | Kremen1         | 84035  | kringle containing transmembrane protein 1                | 3.36 | 1.31 | 0.46 |
| A_51_P336403 | NM_133749  | 2900064A173024  |        | RIKEN cDNA 2900064A13 gene                                | 5.57 | 1.31 | 0.00 |
| A_51_P232771 | NM_025745  | Erlec1          | 66753  | endoplasmic reticulum lectin 1                            | 3.03 | 1.31 | 0.79 |
| A_51_P128499 | XM_128129  | NA              | NA     | NA                                                        | 2.99 | 1.31 | 0.85 |
| A_51_P393598 | NM_023721  | Atp6v1d         | 73834  | ATPase, H+ transporting, lysosomal V1 subunit D           | 3.23 | 1.30 | 0.58 |
| A_52_P274238 | NM_021500  | Maea            | 59003  | macrophage erythroblast attacher                          | 3.27 | 1.30 | 0.53 |
| A_51_P363103 | NM_026678  | Blvra           | 109778 | biliverdin reductase A                                    | 4.38 | 1.30 | 0.11 |
| A_51_P191601 | NM_029841  | 2510039O177034  |        | RIKEN cDNA 2510039O18 gene                                | 3.53 | 1.30 | 0.34 |
| A_52_P131490 | NM_174874  | Atg4b           | 66615  | autophagy-related 4B (yeast)                              | 3.27 | 1.30 | 0.53 |
| A_52_P49601  | NM_010239  | Fth1            | 14319  | ferritin heavy chain 1                                    | 2.95 | 1.30 | 0.92 |
| A_52_P171692 | NM_029821  | 1190003J1:76974 |        | RIKEN cDNA 1190003J15 gene                                | 3.04 | 1.29 | 0.78 |
| A_52_P441614 | NM_026034  | Armc10          | 67211  | armadillo repeat containing 10                            | 3.16 | 1.29 | 0.65 |
| A_52_P442756 | NM_027453  | Btf3l4          | 70533  | basic transcription factor 3-like 4                       | 3.14 | 1.29 | 0.66 |
| A_51_P448545 | AK013012   | Klhl35          | 72184  | kelch-like 35 (Drosophila)                                | 2.93 | 1.29 | 0.96 |
| A_52_P603635 | NM_019661  | Ykt6            | 56418  | YKT6 homolog (S. Cerevisiae)                              | 2.90 | 1.29 | 0.99 |
| A_51_P172842 | NM_025885  | Med19           | 381379 | mediator of RNA polymerase II transcription, subunit 19 I | 3.18 | 1.28 | 0.62 |
| A_51_P109840 | NM_011707  | Vtn             | 22370  | vitronectin                                               | 3.38 | 1.28 | 0.45 |
| A_52_P350306 | XM_001005C | Gm11472         | 668950 | predicted gene 11472                                      | 2.89 | 1.28 | 1.02 |
| A_51_P338776 | NM_172400  | Dnajc8          | 68598  | DnaJ (Hsp40) homolog, subfamily C, member 8               | 3.37 | 1.28 | 0.46 |
| A_51_P150530 | NM_053157  | Tm2d1           | 94043  | TM2 domain containing 1                                   | 3.00 | 1.27 | 0.85 |
| A_51_P448427 | NM_133216  | Xpnpep1         | 170750 | X-prolyl aminopeptidase (aminopeptidase P) 1, soluble     | 3.11 | 1.27 | 0.70 |
| A_52_P524010 | NM_029654  | Atg2b           | 76559  | ATG2 autophagy related 2 homolog B (S. cerevisiae)        | 3.39 | 1.27 | 0.42 |
| A_51_P434803 | NM_009187  | Cox7a2l         | 20463  | cytochrome c oxidase subunit VIIa polypeptide 2-like      | 2.93 | 1.27 | 0.95 |
| A_51_P492830 | NM_021886  | Cenph           | 26886  | centromere protein H                                      | 3.98 | 1.26 | 0.17 |
| A_51_P266695 | NM_172835  | Peli3           | 240518 | pellino 3                                                 | 2.94 | 1.25 | 0.93 |
| A_51_P175483 | NM_011938  | Grk6            | 26385  | G protein-coupled receptor kinase 6                       | 3.31 | 1.25 | 0.49 |
| A_52_P498128 | NM_028381  | Ccdc94          | 72886  | coiled-coil domain containing 94                          | 3.16 | 1.24 | 0.65 |

|              |           |           |        |                                                          |       |      |      |
|--------------|-----------|-----------|--------|----------------------------------------------------------|-------|------|------|
| A_51_P329043 | X55787    | Ets1      | 23871  | E26 avian leukemia oncogene 1, 5' domain                 | 2.93  | 1.23 | 0.95 |
| A_52_P329019 | NM_026101 | Herc4     | 67345  | hect domain and RLD 4                                    | 3.22  | 1.23 | 0.58 |
| A_51_P495242 | NM_010689 | Lat       | 16797  | linker for activation of T cells                         | 3.16  | 1.23 | 0.65 |
| A_51_P476518 | NM_178618 | Fam83g    | 69640  | family with sequence similarity 83, member G             | 3.00  | 1.22 | 0.85 |
| A_52_P101184 | NM_080428 | Fbxw7     | 50754  | F-box and WD-40 domain protein 7                         | 4.22  | 1.21 | 0.13 |
| A_52_P474739 | NM_021608 | Dctn5     | 59288  | dynactin 5                                               | 2.91  | 1.21 | 0.98 |
| A_52_P368262 | AK038789  | Bcl7c     | 12055  | B-cell CLL/lymphoma 7C                                   | 3.02  | 1.20 | 0.81 |
| A_52_P569651 | NM_173180 | Pmpca     | 66865  | peptidase (mitochondrial processing) alpha               | 3.01  | 1.18 | 0.82 |
| A_52_P259258 | BC060121  | Phf20     | 228829 | PHD finger protein 20                                    | 2.95  | 1.15 | 0.93 |
| A_52_P381913 | AK080468  | 7-Mar     | 57438  | membrane-associated ring finger (C3HC4) 7                | -3.33 | 0.86 | 0.40 |
| A_52_P409076 | NM_009154 | Sema5a    | 20356  | sema domain, seven thrombospondin repeats (type 1 an     | -2.97 | 0.85 | 0.75 |
| A_52_P600048 | NM_054040 | Tulp4     | 68842  | tubby like protein 4                                     | -2.84 | 0.83 | 0.96 |
| A_52_P619262 | AK122497  | Mical3    | 194401 | microtubule associated monooxygenase, calponin and LIM   | -2.98 | 0.83 | 0.74 |
| A_51_P447189 | AK041326  | 1700030C1 | 69513  | RIKEN cDNA 1700030C10 gene                               | -2.99 | 0.83 | 0.71 |
| A_52_P956010 | AK081464  | NA        | NA     | NA                                                       | -3.64 | 0.82 | 0.24 |
| A_51_P235994 | NM_172882 | Wdfy3     | 72145  | WD repeat and FYVE domain containing 3                   | -3.49 | 0.82 | 0.31 |
| A_51_P395014 | NM_026688 | Ndufs3    | 68349  | NADH dehydrogenase (ubiquinone) Fe-S protein 3           | -3.32 | 0.81 | 0.40 |
| A_52_P175086 | NM_130879 | Usp48     | 170707 | ubiquitin specific peptidase 48                          | -2.87 | 0.81 | 0.92 |
| A_52_P635910 | NM_028142 | Nsun4     | 72181  | NOL1/NOP2/Sun domain family, member 4                    | -3.73 | 0.81 | 0.21 |
| A_52_P182749 | XM_897688 | D14Abb1e  | 218850 | DNA segment, Chr 14, Abbott 1 expressed                  | -3.07 | 0.81 | 0.62 |
| A_52_P397755 | NA        | NA        | NA     | NA                                                       | -2.89 | 0.81 | 0.87 |
| A_52_P680870 | NM_183315 | Ctxn1     | 330695 | cortexin 1                                               | -4.53 | 0.80 | 0.05 |
| A_52_P488437 | NM_013738 | Plek2     | 27260  | pleckstrin 2                                             | -2.81 | 0.80 | 1.02 |
| A_52_P851407 | AK033152  | NA        | NA     | NA                                                       | -3.05 | 0.80 | 0.66 |
| A_52_P652936 | NM_008520 | Ltbp3     | 16998  | latent transforming growth factor beta binding protein 3 | -3.21 | 0.80 | 0.49 |
| A_51_P205559 | NM_029331 | 1700019G1 | 175541 | RIKEN cDNA 1700019G17 gene                               | -4.70 | 0.79 | 0.06 |
| A_52_P4095   | AK169661  | Auh       | 11992  | AU RNA binding protein/enoyl-coenzyme A hydratase        | -2.97 | 0.79 | 0.74 |
| A_52_P170339 | NM_010898 | Nf2       | 18016  | neurofibromatosis 2                                      | -3.06 | 0.79 | 0.65 |
| A_51_P162437 | XM_898043 | NA        | NA     | NA                                                       | -2.81 | 0.79 | 1.02 |
| A_51_P355735 | NM_030610 | Fgf20     | 80857  | fibroblast growth factor 20                              | -3.69 | 0.78 | 0.22 |
| A_52_P521858 | NM_028636 | Man2c1    | 73744  | mannosidase, alpha, class 2C, member 1                   | -2.94 | 0.78 | 0.79 |
| A_51_P375526 | NM_011037 | Pax2      | 18504  | paired box gene 2                                        | -2.85 | 0.78 | 0.95 |
| A_51_P257496 | NM_027286 | Ace2      | 70008  | angiotensin I converting enzyme (peptidyl-dipeptidase A) | -3.14 | 0.78 | 0.58 |
| A_52_P673917 | AK029359  | A230072CC | 320742 | RIKEN cDNA A230072C01 gene                               | -3.03 | 0.78 | 0.68 |

|               |           |           |        |                                                           |       |      |      |
|---------------|-----------|-----------|--------|-----------------------------------------------------------|-------|------|------|
| A_51_P347673  | AK007011  | Kcnj9     | 16524  | potassium inwardly-rectifying channel, subfamily J, mem   | -3.03 | 0.78 | 0.68 |
| A_51_P133252  | NM_011988 | Slc27a3   | 26568  | solute carrier family 27 (fatty acid transporter), member | -2.85 | 0.78 | 0.95 |
| A_51_P159612  | NM_019487 | Hebp2     | 56016  | heme binding protein 2                                    | -3.32 | 0.78 | 0.40 |
| A_51_P274947  | NM_026487 | Atad1     | 67979  | ATPase family, AAA domain containing 1                    | -2.96 | 0.78 | 0.76 |
| A_52_P947954  | AK081157  | Myst3     | 244349 | MYST histone acetyltransferase (monocytic leukemia) 3     | -3.97 | 0.78 | 0.15 |
| A_51_P491635  | NM_027366 | Ly6g6e    | 70274  | lymphocyte antigen 6 complex, locus G6E                   | -4.36 | 0.77 | 0.09 |
| A_52_P682330  | AK147606  | Psd3      | 234353 | pleckstrin and Sec7 domain containing 3                   | -3.01 | 0.77 | 0.70 |
| A_52_P636343  | NM_178398 | Wipi2     | 74781  | WD repeat domain, phosphoinositide interacting 2          | -3.18 | 0.77 | 0.53 |
| A_51_P109828  | NM_025407 | Uqcrc1    | 22273  | ubiquinol-cytochrome c reductase core protein 1           | -3.52 | 0.77 | 0.28 |
| A_52_P384079  | AK029069  | Rnf139    | 75841  | ring finger protein 139                                   | -2.93 | 0.77 | 0.81 |
| A_52_P389478  | NM_008997 | Rab11b    | 19326  | RAB11B, member RAS oncogene family                        | -3.40 | 0.77 | 0.35 |
| A_52_P575020  | AK078599  | Crls1     | 66586  | cardiolipin synthase 1                                    | -3.37 | 0.77 | 0.37 |
| A_52_P151905  | XM_285588 | Gm5132    | 333452 | predicted gene 5132                                       | -3.12 | 0.77 | 0.59 |
| A_52_P875364  | AK041105  | NA        | NA     | NA                                                        | -3.27 | 0.77 | 0.45 |
| A_52_P612813  | BC070467  | Map2k7    | 26400  | mitogen-activated protein kinase kinase 7                 | -3.33 | 0.77 | 0.40 |
| A_52_P899685  | AK037956  | NA        | NA     | NA                                                        | -2.90 | 0.77 | 0.85 |
| A_51_P333630  | BB204267  | Atl1      | 73991  | atlastin GTPase 1                                         | -3.12 | 0.77 | 0.60 |
| A_52_P586851  | NM_010112 | Efs       | 13644  | embryonal Fyn-associated substrate                        | -3.00 | 0.77 | 0.70 |
| A_52_P462447  | NM_009620 | Adam4     | 11498  | a disintegrin and metallopeptidase domain 4               | -4.78 | 0.77 | 0.07 |
| A_51_P405304  | NM_053172 | Mepe      | 94111  | matrix extracellular phosphoglycoprotein with ASARM m     | -3.12 | 0.77 | 0.59 |
| A_52_P235479  | NM_027554 | Usp38     | 74841  | ubiquitin specific peptidase 38                           | -3.86 | 0.77 | 0.16 |
| A_52_P217796  | NM_023831 | 1500035HC | 76568  | RIKEN cDNA 1500035H01 gene                                | -2.97 | 0.77 | 0.74 |
| A_51_P409919  | NM_146157 | C230096C1 | 230866 | RIKEN cDNA C230096C10 gene                                | -3.31 | 0.76 | 0.42 |
| A_51_P359983  | NM_144529 | Arhgap17  | 70497  | Rho GTPase activating protein 17                          | -3.55 | 0.76 | 0.29 |
| A_52_P1187714 | AK032928  | NA        | NA     | NA                                                        | -3.20 | 0.76 | 0.52 |
| A_51_P261671  | NM_007808 | Cycs      | 13063  | cytochrome c, somatic                                     | -3.09 | 0.76 | 0.62 |
| A_52_P466147  | NM_027852 | Rarres2   | 71660  | retinoic acid receptor responder (tazarotene induced) 2   | -3.17 | 0.76 | 0.55 |
| A_51_P283837  | NM_011508 | Eif1      | 20918  | eukaryotic translation initiation factor 1                | -4.72 | 0.76 | 0.06 |
| A_52_P32893   | NM_023647 | Nipa2     | 93790  | non imprinted in Prader-Willi/Angelman syndrome 2 hon     | -2.94 | 0.76 | 0.79 |
| A_52_P389274  | AK019095  | Sfi1      | 78887  | Sfi1 homolog, spindle assembly associated (yeast)         | -3.53 | 0.76 | 0.29 |
| A_52_P663757  | BC050866  | Tnik      | 665113 | TRAF2 and NCK interacting kinase                          | -4.03 | 0.76 | 0.13 |
| A_52_P503104  | NM_001033 | AU017455  | 105590 | expressed sequence AU017455                               | -3.23 | 0.76 | 0.48 |
| A_52_P1116825 | BU519104  | NA        | NA     | NA                                                        | -3.12 | 0.76 | 0.59 |
| A_51_P255657  | XM_985599 | 2210011C2 | 70134  | RIKEN cDNA 2210011C24 gene                                | -2.82 | 0.76 | 0.99 |



|               |           |                  |        |                                                                     |       |      |      |
|---------------|-----------|------------------|--------|---------------------------------------------------------------------|-------|------|------|
| A_52_P510179  | NM_016845 | Acrbp            | 54137  | proacrosin binding protein                                          | -3.95 | 0.76 | 0.14 |
| A_52_P152274  | NM_024412 | Clcnka           | 12733  | chloride channel Ka                                                 | -4.51 | 0.76 | 0.05 |
| A_51_P374034  | NM_177088 | Ccdc45           | 320162 | coiled-coil domain containing 45                                    | -3.01 | 0.76 | 0.70 |
| A_52_P1036898 | AK148655  | Zfp319           | 79233  | zinc finger protein 319                                             | -3.03 | 0.76 | 0.68 |
| A_52_P328078  | NM_016774 | Atp5b            | 11947  | ATP synthase, H <sup>+</sup> transporting mitochondrial F1 complex  | -4.40 | 0.75 | 0.09 |
| A_52_P543460  | NM_183355 | Pbx1             | 18514  | pre B-cell leukemia transcription factor 1                          | -3.06 | 0.75 | 0.65 |
| A_52_P393781  | NM_009737 | Bcat2            | 12036  | branched chain aminotransferase 2, mitochondrial                    | -3.17 | 0.75 | 0.53 |
| A_51_P370082  | NM_011549 | Tcfef            | 21425  | transcription factor EB                                             | -2.82 | 0.75 | 0.99 |
| A_52_P1069517 | NA        | NA               | NA     | NA                                                                  | -3.05 | 0.75 | 0.67 |
| A_51_P199217  | XM_895899 | NA               | NA     | NA                                                                  | -4.00 | 0.75 | 0.12 |
| A_51_P302149  | NM_007688 | Cfl2             | 12632  | cofilin 2, muscle                                                   | -3.00 | 0.75 | 0.71 |
| A_51_P454943  | NM_008157 | Gpr19            | 14760  | G protein-coupled receptor 19                                       | -3.11 | 0.75 | 0.60 |
| A_51_P419750  | AK051383  | BB085087         | 99939  | expressed sequence BB085087                                         | -3.11 | 0.75 | 0.60 |
| A_52_P248250  | NM_028844 | Aven             | 74268  | apoptosis, caspase activation inhibitor                             | -3.16 | 0.75 | 0.55 |
| A_52_P263589  | NA        | NA               | NA     | NA                                                                  | -3.03 | 0.75 | 0.68 |
| A_51_P285790  | NM_173383 | Dnd1             | 213236 | dead end homolog 1 (zebrafish)                                      | -3.18 | 0.75 | 0.53 |
| A_51_P224216  | NM_020582 | Atp5j2           | 57423  | ATP synthase, H <sup>+</sup> transporting, mitochondrial F0 complex | -2.95 | 0.74 | 0.78 |
| A_52_P631189  | AK053977  | E230008J2:319683 |        | RIKEN cDNA E230008J23 gene                                          | -3.91 | 0.74 | 0.14 |
| A_51_P304417  | NM_001003 | BC030307         | 103220 | cDNA sequence BC030307                                              | -3.26 | 0.74 | 0.46 |
| A_52_P633489  | NM_026161 | C1qtnf4          | 67445  | C1q and tumor necrosis factor related protein 4                     | -4.84 | 0.74 | 0.07 |
| A_51_P341664  | NM_133228 | Zfp87            | 170763 | zinc finger protein 87                                              | -3.19 | 0.74 | 0.52 |
| A_51_P204508  | NM_013925 | Adat1            | 30947  | adenosine deaminase, tRNA-specific 1                                | -2.88 | 0.74 | 0.91 |
| A_51_P164504  | NM_007469 | Apoc1            | 11812  | apolipoprotein C-I                                                  | -3.85 | 0.74 | 0.16 |
| A_52_P835189  | AK042010  | NA               | NA     | NA                                                                  | -3.03 | 0.74 | 0.68 |
| A_51_P233308  | NM_176962 | 6330416L0        | 319615 | RIKEN cDNA 6330416L07 gene                                          | -3.10 | 0.74 | 0.60 |
| A_51_P393518  | BC016539  | Hmcn1            | 545370 | hemicentin 1                                                        | -3.08 | 0.74 | 0.62 |
| A_52_P438578  | NM_057172 | Fubp1            | 51886  | far upstream element (FUSE) binding protein 1                       | -3.18 | 0.74 | 0.53 |
| A_52_P345539  | NM_009484 | Uty              | 22290  | ubiquitously transcribed tetratricopeptide repeat gene, Y           | -4.32 | 0.74 | 0.08 |
| A_51_P334263  | NM_133227 | Nup155           | 170762 | nucleoporin 155                                                     | -2.83 | 0.74 | 0.99 |
| A_51_P450226  | NM_008467 | Kpna4            | 16649  | karyopherin (importin) alpha 4                                      | -3.18 | 0.74 | 0.53 |
| A_51_P176797  | NM_172397 | Limd2            | 67803  | LIM domain containing 2                                             | -3.45 | 0.74 | 0.33 |
| A_52_P36256   | NA        | NA               | NA     | NA                                                                  | -2.82 | 0.74 | 0.99 |
| A_52_P868210  | AK086789  | NA               | NA     | NA                                                                  | -2.97 | 0.74 | 0.74 |
| A_51_P427444  | NM_017472 | Snx3             | 54198  | sorting nexin 3                                                     | -2.94 | 0.73 | 0.79 |

|               |           |           |        |                                                                                                    |       |      |      |
|---------------|-----------|-----------|--------|----------------------------------------------------------------------------------------------------|-------|------|------|
| A_52_P377532  | NM_178035 | Fads6     | 328035 | fatty acid desaturase domain family, member 6                                                      | -2.82 | 0.73 | 0.99 |
| A_52_P636523  | NM_010897 | Nf1       | 18015  | neurofibromatosis 1                                                                                | -2.91 | 0.73 | 0.85 |
| A_52_P446011  | AK044502  | Etnk1     | 75320  | ethanolamine kinase 1                                                                              | -3.53 | 0.73 | 0.28 |
| A_52_P33516   | BB426169  | NA        | NA     | NA                                                                                                 | -3.19 | 0.73 | 0.52 |
| A_51_P339344  | NM_029025 | Tmem81    | 74626  | transmembrane protein 81                                                                           | -2.92 | 0.73 | 0.82 |
| A_51_P442655  | NM_026191 | Dhx40     | 67487  | DEAH (Asp-Glu-Ala-His) box polypeptide 40                                                          | -3.12 | 0.73 | 0.59 |
| A_51_P218910  | BC042507  | 2410066E1 | 68235  | RIKEN cDNA 2410066E13 gene                                                                         | -2.95 | 0.73 | 0.78 |
| A_52_P182592  | NM_025773 | Ube2w     | 66799  | ubiquitin-conjugating enzyme E2W (putative)                                                        | -2.91 | 0.73 | 0.85 |
| A_52_P567839  | NM_172871 | Klhl9     | 242521 | kelch-like 9 (Drosophila)                                                                          | -3.14 | 0.73 | 0.58 |
| A_52_P714230  | NA        | NA        | NA     | NA                                                                                                 | -3.05 | 0.73 | 0.66 |
| A_52_P374193  | NA        | NA        | NA     | NA                                                                                                 | -3.01 | 0.73 | 0.70 |
| A_52_P671784  | NM_172619 | Adamts10  | 224697 | a disintegrin-like and metallopeptidase (reprolysin type) 10                                       | -3.15 | 0.73 | 0.55 |
| A_52_P315022  | XM_917083 | Syne2     | 319565 | synaptic nuclear envelope 2                                                                        | -2.82 | 0.73 | 1.02 |
| A_52_P223524  | NM_027081 | Fam116b   | 69440  | family with sequence similarity 116, member B                                                      | -2.99 | 0.73 | 0.71 |
| A_51_P344376  | NM_013533 | Gpr162    | 14788  | G protein-coupled receptor 162                                                                     | -3.25 | 0.73 | 0.46 |
| A_51_P183543  | X12807    | NA        | NA     | NA                                                                                                 | -3.19 | 0.73 | 0.52 |
| A_52_P640922  | AK220370  | Dcdc2a    | 195208 | doublecortin domain containing 2a                                                                  | -3.30 | 0.73 | 0.43 |
| A_51_P207706  | NM_173375 | Fam180a   | 208164 | family with sequence similarity 180, member A                                                      | -3.85 | 0.73 | 0.16 |
| A_51_P168708  | NM_009725 | Atp5f1    | 11950  | ATP synthase, H <sup>+</sup> transporting, mitochondrial F0 complex c1, cytochrome b558, subunit 1 | -7.49 | 0.73 | 0.00 |
| A_51_P344790  | NM_012020 | Foxl2     | 26927  | forkhead box L2                                                                                    | -3.11 | 0.73 | 0.60 |
| A_52_P436122  | NA        | NA        | NA     | NA                                                                                                 | -3.37 | 0.73 | 0.37 |
| A_52_P656024  | NM_022432 | Sirt2     | 64383  | sirtuin 2 (silent mating type information regulation 2, homolog 2)                                 | -2.85 | 0.73 | 0.95 |
| A_51_P335716  | NM_018743 | Agpat6    | 102247 | 1-acylglycerol-3-phosphate O-acyltransferase 6 (lysophosphatidylcholine acyltransferase 6)         | -2.87 | 0.73 | 0.91 |
| A_52_P494622  | NM_013613 | Nr4a2     | 18227  | nuclear receptor subfamily 4, group A, member 2                                                    | -3.15 | 0.73 | 0.56 |
| A_51_P416647  | NM_010115 | Egfbp2    | 13647  | epidermal growth factor binding protein type B                                                     | -3.09 | 0.73 | 0.62 |
| A_52_P353038  | NM_001025 | Trim26    | 22670  | tripartite motif-containing 26                                                                     | -3.37 | 0.73 | 0.38 |
| A_52_P407280  | BC034843  | Adamts15  | 66548  | ADAMTS-like 5                                                                                      | -4.17 | 0.73 | 0.11 |
| A_52_P1187549 | AK009643  | 2310035P2 | 75683  | RIKEN cDNA 2310035P21 gene                                                                         | -2.89 | 0.73 | 0.87 |
| A_52_P231726  | NM_177088 | Ccdc45    | 320162 | coiled-coil domain containing 45                                                                   | -4.02 | 0.73 | 0.12 |
| A_52_P408657  | NM_019660 | Mycbp     | 56309  | c-myc binding protein                                                                              | -2.89 | 0.73 | 0.89 |
| A_51_P463607  | NM_177310 | Xpnpep3   | 321003 | X-prolyl aminopeptidase (aminopeptidase P) 3, putative                                             | -3.08 | 0.73 | 0.62 |
| A_51_P154417  | NM_010180 | Fbln1     | 14114  | fibulin 1                                                                                          | -2.96 | 0.73 | 0.76 |
| A_52_P37991   | NA        | NA        | NA     | NA                                                                                                 | -3.16 | 0.72 | 0.55 |
| A_52_P528726  | NM_007750 | Cox8a     | 12868  | cytochrome c oxidase, subunit VIIIa                                                                | -3.42 | 0.72 | 0.34 |

|               |           |           |         |                                                              |       |      |      |
|---------------|-----------|-----------|---------|--------------------------------------------------------------|-------|------|------|
| A_51_P482279  | AK030794  | Ppp4r1l   | 1E+08   | protein phosphatase 4, regulatory subunit 1-like             | -4.28 | 0.72 | 0.08 |
| A_51_P483344  | NM_008995 | Pex5      | 19305   | peroxisomal biogenesis factor 5                              | -2.88 | 0.72 | 0.89 |
| A_51_P380685  | NM_023231 | Stoml2    | 66592   | stomatin (Epb7.2)-like 2                                     | -2.90 | 0.72 | 0.87 |
| A_51_P204898  | AK005748  | 1700008AC | 69351   | RIKEN cDNA 1700008A04 gene                                   | -4.04 | 0.72 | 0.13 |
| A_51_P113003  | NM_031863 | Cenpq     | 83815   | centromere protein Q                                         | -3.64 | 0.72 | 0.24 |
| A_52_P147992  | AK038412  | Arglu1    | 234023  | arginine and glutamate rich 1                                | -4.00 | 0.72 | 0.12 |
| A_52_P228107  | BC037640  | Cwf19l1   | 72502   | CWF19-like 1, cell cycle control ( <i>S. pombe</i> )         | -2.84 | 0.72 | 0.96 |
| A_52_P597371  | NM_134094 | Ncald     | 52589   | neurocalcin delta                                            | -2.90 | 0.72 | 0.85 |
| A_52_P502102  | AK030376  | 2310001H1 | 76432   | RIKEN cDNA 2310001H17 gene                                   | -2.87 | 0.72 | 0.91 |
| A_51_P404077  | NM_020510 | Fzd2      | 57265   | frizzled homolog 2 ( <i>Drosophila</i> )                     | -4.10 | 0.72 | 0.10 |
| A_51_P515981  | AK031703  | NA        | NA      | NA                                                           | -4.56 | 0.72 | 0.05 |
| A_52_P654031  | NM_019702 | Hbs1l     | 56422   | Hbs1-like ( <i>S. cerevisiae</i> )                           | -3.00 | 0.72 | 0.70 |
| A_52_P65610   | XM_486062 | NA        | NA      | NA                                                           | -3.18 | 0.72 | 0.53 |
| A_52_P298165  | AK045826  | Gm14964   | 1E+08   | predicted gene 14964                                         | -2.88 | 0.72 | 0.89 |
| A_51_P229732  | AK015605  | 4930481B0 | 74937   | RIKEN cDNA 4930481B07 gene                                   | -3.10 | 0.72 | 0.60 |
| A_52_P623809  | NA        | NA        | NA      | NA                                                           | -2.86 | 0.72 | 0.93 |
| A_51_P247873  | NM_026061 | Ndufb8    | 67264   | NADH dehydrogenase (ubiquinone) 1 beta subcomplex 8          | -4.20 | 0.72 | 0.11 |
| A_52_P649419  | AK162561  | 3110052M0 | 73229   | RIKEN cDNA 3110052M02 gene                                   | -2.91 | 0.72 | 0.85 |
| A_52_P1163677 | AK037099  | NA        | NA      | NA                                                           | -3.09 | 0.72 | 0.62 |
| A_52_P635984  | NM_001038 | Anapc11   | 66156   | anaphase promoting complex subunit 11                        | -2.94 | 0.72 | 0.78 |
| A_52_P408826  | AK079287  | 9530083O1 | 1319610 | RIKEN cDNA 9530083O12 gene                                   | -3.21 | 0.72 | 0.50 |
| A_51_P181025  | AK054076  | E230016M  | 320172  | RIKEN cDNA E230016M11 gene                                   | -4.86 | 0.72 | 0.07 |
| A_51_P342387  | NM_013475 | Apoh      | 11818   | apolipoprotein H                                             | -2.84 | 0.72 | 0.96 |
| A_52_P349318  | NM_029792 | B3gat1    | 76898   | beta-1,3-glucuronyltransferase 1 (glucuronosyltransferas     | -4.17 | 0.71 | 0.11 |
| A_51_P307062  | NM_001001 | BC056474  | 414077  | cDNA sequence BC056474                                       | -2.92 | 0.71 | 0.82 |
| A_51_P177552  | NM_023172 | Ndufb9    | 66218   | NADH dehydrogenase (ubiquinone) 1 beta subcomplex, 9         | -2.99 | 0.71 | 0.71 |
| A_52_P388359  | NM_007453 | Prdx6     | 11758   | peroxiredoxin 6                                              | -4.19 | 0.71 | 0.11 |
| A_51_P388517  | NM_001077 | Ldb2      | 16826   | LIM domain binding 2                                         | -2.99 | 0.71 | 0.72 |
| A_52_P424959  | NM_153457 | Rtn1      | 104001  | reticulon 1                                                  | -3.09 | 0.71 | 0.62 |
| A_52_P552832  | NM_010886 | Ndufa4    | 17992   | NADH dehydrogenase (ubiquinone) 1 alpha subcomplex,          | -4.12 | 0.71 | 0.10 |
| A_51_P277295  | NM_027977 | 2310001A2 | 71881   | RIKEN cDNA 2310001A20 gene                                   | -4.21 | 0.71 | 0.12 |
| A_52_P335166  | NM_001012 | Slc2a9    | 117591  | solute carrier family 2 (facilitated glucose transporter), m | -4.19 | 0.71 | 0.11 |
| A_52_P74684   | NM_028142 | Nsun4     | 72181   | NOL1/NOP2/Sun domain family, member 4                        | -2.99 | 0.71 | 0.72 |
| A_51_P315646  | NM_010911 | Nfs1      | 18041   | nitrogen fixation gene 1 ( <i>S. cerevisiae</i> )            | -5.04 | 0.71 | 0.00 |

|               |           |           |        |                                                                   |       |      |      |
|---------------|-----------|-----------|--------|-------------------------------------------------------------------|-------|------|------|
| A_51_P361184  | NM_026612 | Ndufb2    | 68198  | NADH dehydrogenase (ubiquinone) 1 beta subcomplex, 2              | -3.04 | 0.71 | 0.67 |
| A_51_P318966  | NM_009844 | Cd19      | 12478  | CD19 antigen                                                      | -3.60 | 0.71 | 0.26 |
| A_52_P269588  | BC027816  | Ap1g1     | 11765  | adaptor protein complex AP-1, gamma 1 subunit                     | -3.93 | 0.71 | 0.14 |
| A_52_P480064  | NM_001078 | Tmem134   | 66990  | transmembrane protein 134                                         | -2.82 | 0.71 | 1.02 |
| A_52_P227279  | NM_011703 | Vipr1     | 22354  | vasoactive intestinal peptide receptor 1                          | -4.32 | 0.71 | 0.08 |
| A_52_P551594  | NM_172952 | Gphn      | 268566 | gephyrin                                                          | -2.85 | 0.71 | 0.95 |
| A_51_P127464  | NM_199149 | Lrrc68    | 232947 | leucine rich repeat containing 68                                 | -3.58 | 0.71 | 0.26 |
| A_51_P380432  | NM_198885 | Scx       | 20289  | scleraxis                                                         | -2.82 | 0.71 | 0.99 |
| A_52_P371063  | NM_198026 | Iqcc      | 230767 | IQ motif containing C                                             | -2.82 | 0.71 | 0.99 |
| A_51_P358445  | NM_010061 | Dnase1    | 13419  | deoxyribonuclease I                                               | -4.04 | 0.71 | 0.13 |
| A_52_P665928  | NM_172529 | Gnptg     | 214505 | N-acetylglucosamine-1-phosphotransferase, gamma subunit           | -3.32 | 0.71 | 0.40 |
| A_52_P502461  | NM_029862 | 5930434B0 | 381356 | RIKEN cDNA 5930434B04 gene                                        | -3.97 | 0.71 | 0.15 |
| A_51_P364339  | NM_133666 | Ndufv1    | 17995  | NADH dehydrogenase (ubiquinone) flavoprotein 1                    | -5.22 | 0.71 | 0.00 |
| A_51_P496905  | NM_007686 | Cfi       | 12630  | complement component factor i                                     | -3.82 | 0.71 | 0.18 |
| A_51_P151775  | NM_178719 | Smcr7l    | 239555 | Smith-Magenis syndrome chromosome region, candidate 7             | -3.07 | 0.71 | 0.63 |
| A_52_P238523  | NM_183147 | Sprn      | 212518 | shadow of prion protein                                           | -3.10 | 0.71 | 0.60 |
| A_51_P332481  | NM_010832 | Msl3      | 17692  | male-specific lethal 3 homolog (Drosophila)                       | -2.87 | 0.70 | 0.92 |
| A_51_P232384  | NM_145566 | Agfg2     | 231801 | ArfGAP with FG repeats 2                                          | -3.59 | 0.70 | 0.26 |
| A_52_P257547  | NM_024179 | 0610009O2 | 66839  | RIKEN cDNA 0610009O20 gene                                        | -3.67 | 0.70 | 0.23 |
| A_52_P619388  | NA        | NA        | NA     | NA                                                                | -3.14 | 0.70 | 0.58 |
| A_52_P391805  | NM_028934 | 4930452B0 | 74430  | RIKEN cDNA 4930452B06 gene                                        | -3.02 | 0.70 | 0.70 |
| A_51_P331781  | XM_127489 | Fam151b   | 73942  | family with sequence similarity 151, member B                     | -3.54 | 0.70 | 0.29 |
| A_51_P234888  | NM_027093 | 2310003L2 | 69487  | RIKEN cDNA 2310003L22 gene                                        | -2.81 | 0.70 | 1.02 |
| A_52_P576778  | NM_133718 | Tmem30a   | 69981  | transmembrane protein 30A                                         | -2.81 | 0.70 | 1.02 |
| A_51_P261470  | NM_028388 | Ndufv2    | 72900  | NADH dehydrogenase (ubiquinone) flavoprotein 2                    | -4.25 | 0.70 | 0.08 |
| A_52_P556134  | XM_908122 | NA        | NA     | NA                                                                | -3.04 | 0.70 | 0.68 |
| A_51_P326932  | AK018172  | Prune2    | 353211 | prune homolog 2 (Drosophila)                                      | -4.00 | 0.70 | 0.12 |
| A_51_P178592  | NM_053158 | Mrpl1     | 94061  | mitochondrial ribosomal protein L1                                | -3.91 | 0.70 | 0.14 |
| A_52_P307749  | NM_028756 | Slc35a5   | 74102  | solute carrier family 35, member A5                               | -3.02 | 0.70 | 0.70 |
| A_52_P122867  | NM_022305 | B4galt1   | 14595  | UDP-Gal:betaGlcNAc beta 1,4- galactosyltransferase, polypeptide 1 | -2.99 | 0.70 | 0.71 |
| A_52_P350301  | NA        | NA        | NA     | NA                                                                | -3.21 | 0.70 | 0.50 |
| A_52_P316405  | NA        | NA        | NA     | NA                                                                | -2.98 | 0.70 | 0.74 |
| A_52_P1011730 | AK038827  | A230066D3 | 380656 | RIKEN cDNA A230066D03 gene                                        | -4.08 | 0.70 | 0.10 |
| A_52_P99411   | NM_008410 | Itm2b     | 16432  | integral membrane protein 2B                                      | -2.86 | 0.70 | 0.93 |

|              |           |            |        |                                                            |       |      |      |
|--------------|-----------|------------|--------|------------------------------------------------------------|-------|------|------|
| A_52_P586671 | NM_172518 | Fbxo42     | 213499 | F-box protein 42                                           | -4.53 | 0.70 | 0.05 |
| A_51_P401958 | NM_011528 | Taldo1     | 21351  | transaldolase 1                                            | -3.27 | 0.70 | 0.45 |
| A_52_P671794 | NM_178711 | Plscr4     | 235527 | phospholipid scramblase 4                                  | -2.96 | 0.70 | 0.76 |
| A_52_P517508 | NM_177784 | Klhl23     | 277396 | kelch-like 23 (Drosophila)                                 | -4.72 | 0.70 | 0.06 |
| A_51_P342466 | NM_001024 | Nufip2     | 68564  | nuclear fragile X mental retardation protein interacting p | -3.11 | 0.70 | 0.60 |
| A_52_P65703  | NM_178620 | Mfsd11     | 69900  | major facilitator superfamily domain containing 11         | -3.16 | 0.70 | 0.55 |
| A_51_P392967 | NM_053253 | Zmynd10    | 114602 | zinc finger, MYND domain containing 10                     | -4.24 | 0.70 | 0.08 |
| A_52_P520397 | NM_013897 | Timm8b     | 30057  | translocase of inner mitochondrial membrane 8 homolog      | -3.37 | 0.70 | 0.37 |
| A_51_P224630 | NM_026854 | Dtwd2      | 68857  | DTW domain containing 2                                    | -3.19 | 0.70 | 0.52 |
| A_51_P316431 | NM_080636 | Hars2      | 70791  | histidyl-tRNA synthetase 2, mitochondrial (putative)       | -3.41 | 0.70 | 0.35 |
| A_51_P517126 | NM_013736 | Tceb3      | 27224  | transcription elongation factor B (SIII), polypeptide 3    | -3.10 | 0.70 | 0.60 |
| A_52_P319137 | AK005758  | Lrrc51     | 69358  | leucine rich repeat containing 51                          | -3.20 | 0.70 | 0.52 |
| A_52_P172014 | NA        | NA         | NA     | NA                                                         | -4.55 | 0.70 | 0.05 |
| A_51_P502443 | NM_173048 | Gga3       | 260302 | golgi associated, gamma adaptin ear containing, ARF bindi  | -2.94 | 0.70 | 0.78 |
| A_51_P335729 | AK039370  | NA         | NA     | NA                                                         | -3.60 | 0.70 | 0.26 |
| A_52_P646112 | BC011192  | Rps13      | 68052  | ribosomal protein S13                                      | -2.91 | 0.70 | 0.85 |
| A_52_P82247  | NM_007808 | Cycs       | 13063  | cytochrome c, somatic                                      | -3.62 | 0.69 | 0.25 |
| A_52_P979926 | AK050149  | NA         | NA     | NA                                                         | -3.05 | 0.69 | 0.66 |
| A_52_P91891  | AK029171  | Ppp4r1l    | 1E+08  | protein phosphatase 4, regulatory subunit 1-like           | -3.28 | 0.69 | 0.42 |
| A_51_P260478 | NM_145823 | Pitpnc1    | 71795  | phosphatidylinositol transfer protein, cytoplasmic 1       | -2.96 | 0.69 | 0.76 |
| A_52_P353198 | NM_144514 | Commd1     | 17846  | COMM domain containing 1                                   | -2.92 | 0.69 | 0.82 |
| A_51_P250459 | AK013063  | Mettl5     | 75422  | methyltransferase like 5                                   | -3.81 | 0.69 | 0.18 |
| A_51_P276063 | NM_010726 | Phyh       | 16922  | phytanoyl-CoA hydroxylase                                  | -3.49 | 0.69 | 0.31 |
| A_52_P422222 | NM_024274 | Fars2      | 69955  | phenylalanine-tRNA synthetase 2 (mitochondrial)            | -3.72 | 0.69 | 0.20 |
| A_52_P225466 | BC046763  | Tmem219    | 68742  | transmembrane protein 219                                  | -3.56 | 0.69 | 0.28 |
| A_51_P238165 | X68951    | NA         | NA     | NA                                                         | -3.11 | 0.69 | 0.60 |
| A_52_P111244 | NA        | NA         | NA     | NA                                                         | -2.85 | 0.69 | 0.95 |
| A_51_P426919 | U83174    | Gt(ROSA)2( | 14910  | gene trap ROSA 26, Philippe Soriano                        | -3.08 | 0.69 | 0.62 |
| A_52_P282186 | AK173104  | Slc45a4    | 106068 | solute carrier family 45, member 4                         | -5.69 | 0.69 | 0.00 |
| A_51_P255336 | NM_007661 | Cdk11b     | 12537  | cyclin-dependent kinase 11B                                | -3.33 | 0.69 | 0.40 |
| A_51_P374863 | NM_013742 | Cars       | 27267  | cysteinyl-tRNA synthetase                                  | -3.05 | 0.69 | 0.66 |
| A_52_P543855 | NM_172290 | Ntm        | 235106 | neurotrimin                                                | -4.93 | 0.69 | 0.08 |
| A_52_P31625  | AK079835  | NA         | NA     | NA                                                         | -2.89 | 0.69 | 0.87 |
| A_52_P558368 | NM_175160 | Zdhhc1     | 70796  | zinc finger, DHHC domain containing 1                      | -2.92 | 0.69 | 0.82 |

|              |           |                |        |                                                                    |  |       |      |      |
|--------------|-----------|----------------|--------|--------------------------------------------------------------------|--|-------|------|------|
| A_52_P76904  | NA        | NA             | NA     | NA                                                                 |  | -3.17 | 0.69 | 0.53 |
| A_51_P402496 | NM_007505 | Atp5a1         | 11946  | ATP synthase, H <sup>+</sup> transporting, mitochondrial F1 comple |  | -2.92 | 0.69 | 0.82 |
| A_51_P175146 | NM_027769 | Cpne3          | 70568  | copine III                                                         |  | -3.35 | 0.69 | 0.38 |
| A_51_P188501 | AK053596  | NA             | NA     | NA                                                                 |  | -4.72 | 0.69 | 0.06 |
| A_52_P375323 | NM_177909 | Slc9a9         | 331004 | solute carrier family 9 (sodium/hydrogen exchanger), me            |  | -4.33 | 0.69 | 0.09 |
| A_52_P682299 | AK085055  | Clic4          | 29876  | chloride intracellular channel 4 (mitochondrial)                   |  | -3.22 | 0.69 | 0.49 |
| A_51_P500544 | NM_025813 | Mfsd1          | 66868  | major facilitator superfamily domain containing 1                  |  | -3.01 | 0.69 | 0.70 |
| A_52_P875598 | AK047419  | NA             | NA     | NA                                                                 |  | -3.78 | 0.69 | 0.17 |
| A_52_P227919 | NM_207142 | Olfr1036       | 258245 | olfactory receptor 1036                                            |  | -3.41 | 0.69 | 0.35 |
| A_52_P222669 | AK013859  | Tmem186        | 66690  | transmembrane protein 186                                          |  | -3.89 | 0.69 | 0.16 |
| A_51_P302823 | NM_019686 | Cib2           | 56506  | calcium and integrin binding family member 2                       |  | -4.09 | 0.69 | 0.10 |
| A_51_P486217 | NM_175638 | Wnk4           | 69847  | WNK lysine deficient protein kinase 4                              |  | -3.41 | 0.69 | 0.35 |
| A_52_P231428 | XM_898270 | NA             | NA     | NA                                                                 |  | -3.03 | 0.69 | 0.68 |
| A_51_P182456 | AK009638  | Pcgf3          | 69587  | polycomb group ring finger 3                                       |  | -3.11 | 0.69 | 0.60 |
| A_52_P997209 | NA        | NA             | NA     | NA                                                                 |  | -3.54 | 0.69 | 0.29 |
| A_51_P160664 | NM_025379 | Cox7b          | 66142  | cytochrome c oxidase subunit VIIb                                  |  | -3.94 | 0.69 | 0.14 |
| A_51_P493522 | NM_178929 | Kazald1        | 107250 | Kazal-type serine peptidase inhibitor domain 1                     |  | -3.20 | 0.69 | 0.52 |
| A_52_P120719 | NM_030554 | Rab27b         | 80718  | RAB27b, member RAS oncogene family                                 |  | -3.25 | 0.69 | 0.46 |
| A_52_P347826 | NM_009826 | Rb1cc1         | 12421  | RB1-inducible coiled-coil 1                                        |  | -3.89 | 0.69 | 0.16 |
| A_52_P763635 | AK087135  | NA             | NA     | NA                                                                 |  | -3.40 | 0.69 | 0.36 |
| A_52_P106929 | BC049640  | Atp5f1         | 11950  | ATP synthase, H <sup>+</sup> transporting, mitochondrial F0 comple |  | -3.61 | 0.69 | 0.25 |
| A_52_P504787 | NM_010141 | Epha7          | 13841  | Eph receptor A7                                                    |  | -3.16 | 0.69 | 0.55 |
| A_52_P679273 | AK036632  | 2310001H176432 |        | RIKEN cDNA 2310001H17 gene                                         |  | -4.16 | 0.68 | 0.11 |
| A_52_P515407 | AK033538  | Arih1          | 23806  | ariadne ubiquitin-conjugating enzyme E2 binding protein            |  | -4.54 | 0.68 | 0.05 |
| A_52_P585699 | NM_025296 | Ciao1          | 26371  | cytosolic iron-sulfur protein assembly 1 homolog (S. cere          |  | -5.06 | 0.68 | 0.00 |
| A_52_P86073  | NM_001039 | Mrpl1          | 94061  | mitochondrial ribosomal protein L1                                 |  | -4.02 | 0.68 | 0.12 |
| A_52_P358913 | AK054418  | D830024N08     | 319911 | RIKEN cDNA D830024N08 gene                                         |  | -3.02 | 0.68 | 0.70 |
| A_51_P139490 | NM_146034 | Ctage5         | 217615 | CTAGE family, member 5                                             |  | -3.22 | 0.68 | 0.49 |
| A_52_P668715 | NM_026532 | Nutf2          | 68051  | nuclear transport factor 2                                         |  | -3.19 | 0.68 | 0.52 |
| A_52_P372925 | NM_010879 | Nck2           | 17974  | non-catalytic region of tyrosine kinase adaptor protein 2          |  | -3.11 | 0.68 | 0.60 |
| A_52_P48670  | NM_025366 | Chchd1         | 66121  | coiled-coil-helix-coiled-coil-helix domain containing 1            |  | -3.11 | 0.68 | 0.60 |
| A_52_P322467 | AK032189  | Nit1           | 27045  | nitrilase 1                                                        |  | -3.49 | 0.68 | 0.31 |
| A_52_P540360 | NM_177922 | Mapk15         | 332110 | mitogen-activated protein kinase 15                                |  | -3.01 | 0.68 | 0.70 |
| A_51_P373609 | NM_198246 | Yars2          | 70120  | tyrosyl-tRNA synthetase 2 (mitochondrial)                          |  | -3.06 | 0.68 | 0.65 |

|              |           |                 |        |                                                                     |       |      |      |
|--------------|-----------|-----------------|--------|---------------------------------------------------------------------|-------|------|------|
| A_51_P335710 | NM_018743 | Agpat6          | 102247 | 1-acylglycerol-3-phosphate O-acyltransferase 6 (lysophos            | -2.86 | 0.68 | 0.93 |
| A_52_P467140 | NM_019776 | Snd1            | 56463  | staphylococcal nuclease and tudor domain containing 1               | -3.66 | 0.68 | 0.24 |
| A_51_P128287 | NM_027360 | 2010107E070257  |        | RIKEN cDNA 2010107E04 gene                                          | -3.64 | 0.68 | 0.23 |
| A_52_P244908 | AK031010  | NA              | NA     | NA                                                                  | -2.96 | 0.68 | 0.76 |
| A_51_P397548 | NM_175374 | Mtrf1l          | 108853 | mitochondrial translational release factor 1-like                   | -4.03 | 0.68 | 0.13 |
| A_52_P180335 | NM_024227 | Mrpl28          | 68611  | mitochondrial ribosomal protein L28                                 | -3.72 | 0.68 | 0.21 |
| A_51_P264186 | NM_027862 | Atp5h           | 71679  | ATP synthase, H <sup>+</sup> transporting, mitochondrial F0 complex | -3.27 | 0.68 | 0.45 |
| A_52_P685938 | NM_172698 | 4732418C0230648 |        | RIKEN cDNA 4732418C07 gene                                          | -3.32 | 0.68 | 0.40 |
| A_51_P149960 | NM_173012 | Letm2           | 270035 | leucine zipper-EF-hand containing transmembrane prote               | -4.71 | 0.68 | 0.06 |
| A_52_P124264 | NM_027569 | Spag9           | 70834  | sperm associated antigen 9                                          | -3.28 | 0.68 | 0.42 |
| A_52_P149213 | NA        | NA              | NA     | NA                                                                  | -3.34 | 0.68 | 0.40 |
| A_51_P130666 | NM_134079 | Adk             | 11534  | adenosine kinase                                                    | -3.58 | 0.68 | 0.26 |
| A_52_P322181 | CK020710  | Adrb1           | 11554  | adrenergic receptor, beta 1                                         | -3.28 | 0.68 | 0.42 |
| A_52_P380329 | NM_198600 | Papd7           | 210106 | PAP associated domain containing 7                                  | -3.79 | 0.68 | 0.17 |
| A_52_P162775 | NM_153176 | Spg7            | 234847 | spastic paraplegia 7 homolog (human)                                | -3.54 | 0.68 | 0.29 |
| A_52_P474551 | AK042559  | Kcnq1ot1        | 63830  | KCNQ1 overlapping transcript 1                                      | -3.93 | 0.68 | 0.14 |
| A_52_P641195 | NM_001033 | 1700029J069479  |        | RIKEN cDNA 1700029J07 gene                                          | -3.15 | 0.68 | 0.56 |
| A_51_P152423 | NM_177640 | D030056L2225995 |        | RIKEN cDNA D030056L22 gene                                          | -3.77 | 0.68 | 0.19 |
| A_52_P279120 | NA        | NA              | NA     | NA                                                                  | -3.08 | 0.68 | 0.62 |
| A_51_P466148 | NM_007533 | Bckdha          | 12039  | branched chain ketoacid dehydrogenase E1, alpha polype              | -3.04 | 0.68 | 0.67 |
| A_51_P256003 | NM_009551 | Zfand5          | 22682  | zinc finger, AN1-type domain 5                                      | -2.83 | 0.68 | 0.98 |
| A_51_P407675 | NM_011663 | Zrsr1           | 22183  | zinc finger (CCCH type), RNA binding motif and serine/arg           | -4.06 | 0.68 | 0.13 |
| A_51_P105991 | NM_011538 | Tbx6            | 21389  | T-box 6                                                             | -2.81 | 0.67 | 1.02 |
| A_51_P147207 | NM_011563 | Prdx2           | 21672  | peroxiredoxin 2                                                     | -2.89 | 0.67 | 0.87 |
| A_51_P247665 | NM_178811 | Ttc15           | 217449 | tetratricopeptide repeat domain 15                                  | -2.83 | 0.67 | 0.99 |
| A_52_P538379 | NM_013924 | Abt1            | 30946  | activator of basal transcription 1                                  | -3.23 | 0.67 | 0.49 |
| A_51_P339154 | NM_146058 | NA              | NA     | NA                                                                  | -3.63 | 0.67 | 0.25 |
| A_52_P672825 | BC106120  | Rad9b           | 231724 | RAD9 homolog B ( <i>S. cerevisiae</i> )                             | -3.83 | 0.67 | 0.18 |
| A_51_P200819 | NM_016764 | Prdx4           | 53381  | peroxiredoxin 4                                                     | -4.72 | 0.67 | 0.06 |
| A_51_P155323 | NM_010406 | Hc              | 15139  | hemolytic complement                                                | -3.54 | 0.67 | 0.29 |
| A_51_P183971 | NM_019446 | Barhl1          | 54422  | BarH-like 1 ( <i>Drosophila</i> )                                   | -3.53 | 0.67 | 0.28 |
| A_51_P260169 | NM_010360 | Gstm5           | 14866  | glutathione S-transferase, mu 5                                     | -3.40 | 0.67 | 0.35 |
| A_52_P683945 | XM_884867 | Gm6155          | 620480 | predicted gene 6155                                                 | -3.85 | 0.67 | 0.16 |
| A_51_P317695 | NM_019510 | Trpc3           | 22065  | transient receptor potential cation channel, subfamily C,           | -3.72 | 0.67 | 0.21 |

|              |           |                 |        |                                                            |       |      |      |
|--------------|-----------|-----------------|--------|------------------------------------------------------------|-------|------|------|
| A_52_P67964  | NM_009280 | Ss18            | 268996 | synovial sarcoma translocation, Chromosome 18              | -3.65 | 0.67 | 0.24 |
| A_51_P155755 | AK077214  | Pld6            | 194908 | phospholipase D family, member 6                           | -3.54 | 0.67 | 0.29 |
| A_51_P455946 | NM_133223 | Rac3            | 170758 | RAS-related C3 botulinum substrate 3                       | -2.89 | 0.67 | 0.89 |
| A_52_P218132 | AK083930  | Top1            | 21969  | topoisomerase (DNA) I                                      | -3.03 | 0.67 | 0.68 |
| A_52_P444235 | NA        | NA              | NA     | NA                                                         | -6.11 | 0.67 | 0.00 |
| A_51_P249215 | NM_008964 | Ptger2          | 19217  | prostaglandin E receptor 2 (subtype EP2)                   | -3.48 | 0.67 | 0.32 |
| A_52_P89099  | NM_001039 | Nolc1           | 70769  | nucleolar and coiled-body phosphoprotein 1                 | -2.98 | 0.67 | 0.72 |
| A_51_P257156 | NM_029832 | Ddrgrk1         | 77006  | DDRGK domain containing 1                                  | -3.78 | 0.67 | 0.17 |
| A_52_P374681 | NM_177394 | A730011L0338371 |        | RIKEN cDNA A730011L01 gene                                 | -3.35 | 0.67 | 0.38 |
| A_52_P538709 | NM_133932 | Tada3           | 101206 | transcriptional adaptor 3                                  | -3.12 | 0.67 | 0.60 |
| A_51_P109939 | NM_144897 | Apoa1bp         | 246703 | apolipoprotein A-I binding protein                         | -3.22 | 0.67 | 0.49 |
| A_52_P558699 | NM_211355 | Smek1           | 68734  | SMEK homolog 1, suppressor of mek1 (Dictyostelium)         | -3.32 | 0.67 | 0.40 |
| A_51_P127456 | BC070402  | Lrrc68          | 232947 | leucine rich repeat containing 68                          | -4.34 | 0.67 | 0.09 |
| A_51_P118715 | NM_026274 | Rspry1          | 67610  | ring finger and SPRY domain containing 1                   | -3.05 | 0.67 | 0.66 |
| A_51_P432802 | NM_009032 | Rbm4            | 19653  | RNA binding motif protein 4                                | -3.17 | 0.67 | 0.53 |
| A_51_P296057 | NM_030680 | Upf1            | 19704  | UPF1 regulator of nonsense transcripts homolog (yeast)     | -3.03 | 0.67 | 0.68 |
| A_51_P440399 | NM_012060 | Bcap31          | 27061  | B-cell receptor-associated protein 31                      | -3.52 | 0.67 | 0.28 |
| A_51_P289249 | AK160276  | NA              | NA     | NA                                                         | -4.03 | 0.67 | 0.13 |
| A_51_P138651 | NM_010562 | Ilk             | 16202  | integrin linked kinase                                     | -3.27 | 0.67 | 0.45 |
| A_52_P208703 | AK122210  | Ubap2l          | 74383  | ubiquitin associated protein 2-like                        | -3.69 | 0.67 | 0.22 |
| A_52_P278154 | NM_027236 | Eif1ad          | 69860  | eukaryotic translation initiation factor 1A domain contain | -3.00 | 0.67 | 0.71 |
| A_52_P311104 | NM_012047 | Brd7            | 26992  | bromodomain containing 7                                   | -3.13 | 0.67 | 0.58 |
| A_51_P214916 | NM_001030 | Ndufs5          | 595136 | NADH dehydrogenase (ubiquinone) Fe-S protein 5             | -3.74 | 0.67 | 0.21 |
| A_52_P485000 | AK052489  | Palld           | 72333  | palladin, cytoskeletal associated protein                  | -2.81 | 0.67 | 1.02 |
| A_52_P187167 | NM_001040 | Rspo4           | 228770 | R-spondin family, member 4                                 | -4.06 | 0.67 | 0.13 |
| A_52_P247491 | NM_001042 | Ddhd1           | 114874 | DDHD domain containing 1                                   | -3.19 | 0.67 | 0.52 |
| A_51_P121359 | NM_001029 | Zc3h18          | 76014  | zinc finger CCCH-type containing 18                        | -2.82 | 0.67 | 0.99 |
| A_51_P168945 | NM_016985 | Mtmr1           | 53332  | myotubularin related protein 1                             | -4.88 | 0.67 | 0.08 |
| A_52_P218623 | NA        | NA              | NA     | NA                                                         | -3.21 | 0.67 | 0.50 |
| A_51_P328432 | NA        | NA              | NA     | NA                                                         | -3.59 | 0.67 | 0.26 |
| A_51_P272123 | NM_024197 | Ndufa10         | 67273  | NADH dehydrogenase (ubiquinone) 1 alpha subcomplex :       | -3.29 | 0.67 | 0.42 |
| A_51_P427317 | NM_013855 | Abca3           | 27410  | ATP-binding cassette, sub-family A (ABC1), member 3        | -3.66 | 0.66 | 0.24 |
| A_51_P290819 | NM_025798 | Hint3           | 66847  | histidine triad nucleotide binding protein 3               | -2.83 | 0.66 | 0.98 |
| A_52_P266459 | NM_023503 | Ing2            | 69260  | inhibitor of growth family, member 2                       | -3.39 | 0.66 | 0.36 |



|               |           |           |        |                                                                          |       |      |      |
|---------------|-----------|-----------|--------|--------------------------------------------------------------------------|-------|------|------|
| A_51_P237613  | NM_008010 | Fgfr3     | 14184  | fibroblast growth factor receptor 3                                      | -3.95 | 0.66 | 0.14 |
| A_52_P325621  | NA        | NA        | NA     | NA                                                                       | -3.29 | 0.66 | 0.42 |
| A_51_P368580  | BC032216  | Ablim1    | 226251 | actin-binding LIM protein 1                                              | -3.46 | 0.66 | 0.33 |
| A_52_P143287  | NM_001005 | Itgb4     | 192897 | integrin beta 4                                                          | -2.86 | 0.66 | 0.93 |
| A_51_P331870  | NM_028862 | Rnf145    | 74315  | ring finger protein 145                                                  | -3.00 | 0.66 | 0.70 |
| A_52_P193925  | NM_028072 | Sulf2     | 72043  | sulfatase 2                                                              | -2.82 | 0.66 | 0.99 |
| A_51_P440443  | NM_138586 | Exosc5    | 27998  | exosome component 5                                                      | -4.42 | 0.66 | 0.09 |
| A_52_P234087  | AK053336  | Tek       | 21687  | endothelial-specific receptor tyrosine kinase                            | -3.16 | 0.66 | 0.55 |
| A_51_P308394  | NM_172732 | Clec9a    | 232414 | C-type lectin domain family 9, member a                                  | -3.89 | 0.66 | 0.16 |
| A_51_P423825  | NA        | NA        | NA     | NA                                                                       | -3.61 | 0.66 | 0.26 |
| A_51_P151484  | NM_009721 | Atp1b1    | 11931  | ATPase, Na <sup>+</sup> /K <sup>+</sup> transporting, beta 1 polypeptide | -4.18 | 0.66 | 0.11 |
| A_51_P303824  | NM_029588 | 1700012L0 | 76383  | RIKEN cDNA 1700012L04 gene                                               | -3.17 | 0.66 | 0.53 |
| A_52_P1179988 | AK050242  | NA        | NA     | NA                                                                       | -3.96 | 0.66 | 0.15 |
| A_52_P639223  | NM_009738 | Bche      | 12038  | butyrylcholinesterase                                                    | -3.09 | 0.66 | 0.60 |
| A_52_P679491  | AK054185  | Mrpl3     | 94062  | mitochondrial ribosomal protein L3                                       | -3.08 | 0.66 | 0.62 |
| A_51_P147651  | NA        | NA        | NA     | NA                                                                       | -3.02 | 0.66 | 0.70 |
| A_52_P458524  | XR_002277 | NA        | NA     | NA                                                                       | -3.88 | 0.66 | 0.16 |
| A_52_P627631  | NA        | NA        | NA     | NA                                                                       | -3.51 | 0.66 | 0.29 |
| A_51_P117752  | NM_009714 | Asgr1     | 11889  | asialoglycoprotein receptor 1                                            | -2.92 | 0.66 | 0.82 |
| A_52_P964651  | AK158217  | Fam65c    | 69553  | family with sequence similarity 65, member C                             | -3.65 | 0.66 | 0.24 |
| A_51_P519592  | NM_010178 | Sfrs13a   | 14105  | splicing factor, arginine/serine-rich 13A                                | -3.46 | 0.66 | 0.33 |
| A_51_P431316  | NM_025773 | Ube2w     | 66799  | ubiquitin-conjugating enzyme E2W (putative)                              | -5.44 | 0.66 | 0.00 |
| A_52_P58994   | NM_008831 | Phb       | 18673  | prohibitin                                                               | -2.82 | 0.66 | 0.99 |
| A_52_P194680  | BI152977  | NA        | NA     | NA                                                                       | -3.40 | 0.66 | 0.35 |
| A_52_P200359  | NM_080633 | Aco2      | 11429  | aconitase 2, mitochondrial                                               | -2.98 | 0.66 | 0.72 |
| A_51_P201254  | AK047739  | NA        | NA     | NA                                                                       | -3.03 | 0.66 | 0.68 |
| A_52_P293785  | NA        | NA        | NA     | NA                                                                       | -3.88 | 0.66 | 0.16 |
| A_52_P289685  | NM_028358 | Ssbp1     | 381760 | single-stranded DNA binding protein 1                                    | -2.97 | 0.66 | 0.75 |
| A_52_P609972  | NM_007925 | Eln       | 13717  | elastin                                                                  | -3.56 | 0.66 | 0.27 |
| A_52_P137361  | NM_181820 | Tmc4      | 353499 | transmembrane channel-like gene family 4                                 | -4.12 | 0.66 | 0.10 |
| A_52_P406995  | NM_172490 | Sepsecs   | 211006 | Sep (O-phosphoserine) tRNA:Sec (selenocysteine) tRNA s                   | -3.07 | 0.66 | 0.63 |
| A_51_P143002  | NM_026182 | Mtfr1     | 67472  | mitochondrial fission regulator 1                                        | -3.91 | 0.66 | 0.14 |
| A_52_P347500  | BC035276  | Ttll5     | 320244 | tubulin tyrosine ligase-like family, member 5                            | -3.36 | 0.66 | 0.37 |
| A_51_P502132  | NM_011985 | Mmp23     | 26561  | matrix metalloproteinase 23                                              | -2.92 | 0.66 | 0.82 |

|               |           |            |        |                                                         |       |      |      |
|---------------|-----------|------------|--------|---------------------------------------------------------|-------|------|------|
| A_51_P427768  | NM_007858 | Diap1      | 13367  | diaphanous homolog 1 (Drosophila)                       | -3.12 | 0.66 | 0.59 |
| A_52_P893440  | NM_011563 | Prdx2      | 21672  | peroxiredoxin 2                                         | -2.92 | 0.66 | 0.82 |
| A_52_P468537  | NM_018888 | Uqcc       | 56046  | ubiquinol-cytochrome c reductase complex chaperone, C   | -4.45 | 0.66 | 0.10 |
| A_51_P120295  | NM_029562 | Cyp2d26    | 76279  | cytochrome P450, family 2, subfamily d, polypeptide 26  | -3.49 | 0.66 | 0.31 |
| A_52_P295906  | AK049081  | Ammecr1l   | 225339 | AMME chromosomal region gene 1-like                     | -6.31 | 0.66 | 0.00 |
| A_51_P146126  | AK169586  | Cdkn1b     | 12576  | cyclin-dependent kinase inhibitor 1B                    | -3.93 | 0.65 | 0.14 |
| A_51_P421734  | NM_011390 | Slc12a7    | 20499  | solute carrier family 12, member 7                      | -2.85 | 0.65 | 0.95 |
| A_52_P590205  | NM_019913 | Txn2       | 56551  | thioredoxin 2                                           | -3.04 | 0.65 | 0.67 |
| A_51_P362054  | NM_025983 | Atp5e      | 67126  | ATP synthase, H+ transporting, mitochondrial F1 complex | -3.11 | 0.65 | 0.60 |
| A_51_P171697  | NM_018858 | Pebp1      | 23980  | phosphatidylethanolamine binding protein 1              | -2.96 | 0.65 | 0.75 |
| A_52_P69702   | NM_025348 | Ndufa3     | 66091  | NADH dehydrogenase (ubiquinone) 1 alpha subcomplex,     | -3.22 | 0.65 | 0.49 |
| A_51_P352245  | NM_018744 | Sema6a     | 20358  | sema domain, transmembrane domain (TM), and cytopla     | -3.36 | 0.65 | 0.37 |
| A_51_P362818  | BC031139  | Nlrp6      | 101613 | NLR family, pyrin domain containing 6                   | -2.97 | 0.65 | 0.75 |
| A_51_P217415  | XM_126830 | 2410004P03 | 73667  | RIKEN cDNA 2410004P03 gene                              | -3.22 | 0.65 | 0.49 |
| A_52_P174771  | NM_174874 | Atg4b      | 66615  | autophagy-related 4B (yeast)                            | -3.44 | 0.65 | 0.35 |
| A_51_P102782  | NM_199195 | Bckdhb     | 12040  | branched chain ketoacid dehydrogenase E1, beta polypep  | -2.84 | 0.65 | 0.96 |
| A_51_P353252  | NM_178920 | Mal2       | 105853 | mal, T-cell differentiation protein 2                   | -2.87 | 0.65 | 0.91 |
| A_52_P219415  | NM_181820 | Tmc4       | 353499 | transmembrane channel-like gene family 4                | -4.51 | 0.65 | 0.05 |
| A_51_P503057  | NM_011482 | Nhp2l1     | 20826  | NHP2 non-histone chromosome protein 2-like 1 (S. cerev  | -3.38 | 0.65 | 0.38 |
| A_51_P319392  | NM_145938 | Rpp40      | 208366 | ribonuclease P 40 subunit (human)                       | -3.21 | 0.65 | 0.50 |
| A_52_P589065  | NM_019709 | Mbtps1     | 56453  | membrane-bound transcription factor peptidase, site 1   | -3.41 | 0.65 | 0.35 |
| A_52_P323044  | NM_010439 | Hmgb1      | 15289  | high mobility group box 1                               | -3.60 | 0.65 | 0.26 |
| A_51_P221781  | AK009327  | Zfp33b     | 69623  | zinc finger protein 33B                                 | -4.50 | 0.65 | 0.05 |
| A_52_P14342   | BC060616  | D930016D06 | 100662 | RIKEN cDNA D930016D06 gene                              | -3.12 | 0.65 | 0.60 |
| A_51_P133229  | NM_028072 | Sulf2      | 72043  | sulfatase 2                                             | -3.20 | 0.65 | 0.50 |
| A_52_P145076  | NM_019561 | Ensa       | 56205  | endosulfine alpha                                       | -5.53 | 0.65 | 0.00 |
| A_52_P170054  | NM_030087 | Ndufv3     | 78330  | NADH dehydrogenase (ubiquinone) flavoprotein 3          | -2.92 | 0.65 | 0.82 |
| A_52_P1020019 | AK047343  | NA         | NA     | NA                                                      | -3.39 | 0.65 | 0.36 |
| A_52_P448749  | AK053942  | Tc2n       | 74413  | tandem C2 domains, nuclear                              | -3.55 | 0.65 | 0.27 |
| A_52_P88722   | NM_025483 | Senp7      | 66315  | SUMO1/sentrin specific peptidase 7                      | -4.47 | 0.65 | 0.05 |
| A_51_P218205  | NM_144514 | Commd1     | 17846  | COMM domain containing 1                                | -2.84 | 0.65 | 0.96 |
| A_52_P300331  | NM_177327 | Wwp1       | 107568 | WW domain containing E3 ubiquitin protein ligase 1      | -2.82 | 0.65 | 0.99 |
| A_51_P210877  | NM_001024 | Pcnp       | 76302  | PEST proteolytic signal containing nuclear protein      | -4.26 | 0.65 | 0.08 |
| A_51_P413147  | NM_008693 | Klk1b3     | 18050  | kallikrein 1-related peptidase b3                       | -3.45 | 0.65 | 0.33 |

|               |           |                 |                                                                    |       |      |      |
|---------------|-----------|-----------------|--------------------------------------------------------------------|-------|------|------|
| A_51_P459091  | NM_172550 | A130042E2216119 | RIKEN cDNA A130042E20 gene                                         | -4.60 | 0.65 | 0.06 |
| A_52_P280448  | NA        | NA              | NA                                                                 | -3.95 | 0.65 | 0.14 |
| A_51_P302890  | BC100493  | 1700013F075504  | RIKEN cDNA 1700013F07 gene                                         | -3.06 | 0.65 | 0.65 |
| A_51_P163624  | AK044029  | Chadl 214685    | chondroadherin-like                                                | -2.88 | 0.65 | 0.91 |
| A_52_P1036554 | AK084098  | Usp15 14479     | ubiquitin specific peptidase 15                                    | -3.21 | 0.65 | 0.50 |
| A_52_P313523  | NM_028934 | 4930452B074430  | RIKEN cDNA 4930452B06 gene                                         | -3.13 | 0.65 | 0.59 |
| A_52_P1093473 | NM_028177 | Ndufab1 70316   | NADH dehydrogenase (ubiquinone) 1, alpha/beta subcon               | -3.97 | 0.65 | 0.15 |
| A_52_P572255  | NM_145556 | Tardbp 230908   | TAR DNA binding protein                                            | -4.23 | 0.65 | 0.10 |
| A_52_P555680  | NM_178811 | Ttc15 217449    | tetratricopeptide repeat domain 15                                 | -3.47 | 0.65 | 0.33 |
| A_52_P138723  | NM_153799 | Edc3 353190     | enhancer of mRNA decapping 3 homolog ( <i>S. cerevisiae</i> )      | -2.92 | 0.65 | 0.82 |
| A_52_P342860  | NM_007954 | Es1 13884       | esterase 1                                                         | -4.32 | 0.65 | 0.08 |
| A_52_P519317  | NA        | NA              | NA                                                                 | -3.31 | 0.65 | 0.42 |
| A_51_P285097  | NM_029687 | Wdr38 76646     | WD repeat domain 38                                                | -2.86 | 0.65 | 0.93 |
| A_51_P232708  | NM_018787 | Npff 54615      | neuropeptide FF-amide peptide precursor                            | -3.47 | 0.65 | 0.32 |
| A_51_P337230  | NM_027864 | Galnt14 71685   | UDP-N-acetyl-alpha-D-galactosamine:polypeptide N-acet              | -3.40 | 0.65 | 0.36 |
| A_52_P298158  | NM_172605 | Tdrd3 219249    | tudor domain containing 3                                          | -3.13 | 0.65 | 0.58 |
| A_51_P265685  | NM_026673 | Apoo 68316      | apolipoprotein O                                                   | -3.48 | 0.65 | 0.32 |
| A_51_P359374  | NM_080456 | Mrps6 121022    | mitochondrial ribosomal protein S6                                 | -3.07 | 0.64 | 0.65 |
| A_51_P172692  | NM_017478 | Copg2 54160     | coatamer protein complex, subunit gamma 2                          | -2.90 | 0.64 | 0.87 |
| A_52_P403764  | NM_029432 | 4930402H2228602 | RIKEN cDNA 4930402H24 gene                                         | -3.54 | 0.64 | 0.29 |
| A_51_P102174  | XM_898869 | NA              | NA                                                                 | -3.94 | 0.64 | 0.14 |
| A_51_P259064  | AK020443  | Ube2d3 66105    | ubiquitin-conjugating enzyme E2D 3 (UBC4/5 homolog, y              | -2.84 | 0.64 | 0.96 |
| A_51_P366244  | AK018143  | Cgn 70737       | cingulin                                                           | -2.92 | 0.64 | 0.82 |
| A_51_P184910  | NM_029293 | Phpt1 75454     | phosphohistidine phosphatase 1                                     | -3.17 | 0.64 | 0.55 |
| A_51_P295582  | NM_025530 | Cutc 66388      | cutC copper transporter homolog ( <i>E.coli</i> )                  | -5.68 | 0.64 | 0.00 |
| A_51_P417279  | AK002600  | 0610012G0106264 | RIKEN cDNA 0610012G03 gene                                         | -3.74 | 0.64 | 0.21 |
| A_52_P327791  | AK032600  | Cdadc1 71891    | cytidine and dCMP deaminase domain containing 1                    | -3.93 | 0.64 | 0.14 |
| A_51_P358171  | NM_019488 | Slc2a8 56017    | solute carrier family 2, (facilitated glucose transporter), n      | -3.46 | 0.64 | 0.33 |
| A_51_P208637  | BC006833  | Poldip2 67811   | polymerase (DNA-directed), delta interacting protein 2             | -4.48 | 0.64 | 0.05 |
| A_51_P100866  | NM_016755 | Atp5j 11957     | ATP synthase, H <sup>+</sup> transporting, mitochondrial F0 comple | -3.17 | 0.64 | 0.53 |
| A_51_P445662  | NM_008292 | Hsd17b4 15488   | hydroxysteroid (17-beta) dehydrogenase 4                           | -3.48 | 0.64 | 0.31 |
| A_52_P469277  | AF087578  | Slc1a1 20510    | solute carrier family 1 (neuronal/epithelial high affinity gl      | -3.38 | 0.64 | 0.36 |
| A_51_P258566  | BC058680  | Mdm4 17248      | transformed mouse 3T3 cell double minute 4                         | -3.43 | 0.64 | 0.34 |
| A_52_P509906  | NM_026298 | lft172 67661    | intraflagellar transport 172 homolog ( <i>Chlamydomonas</i> )      | -2.94 | 0.64 | 0.79 |

|              |           |           |        |                                                                     |       |      |      |
|--------------|-----------|-----------|--------|---------------------------------------------------------------------|-------|------|------|
| A_51_P332100 | NM_009826 | Rb1cc1    | 12421  | RB1-inducible coiled-coil 1                                         | -3.06 | 0.64 | 0.65 |
| A_52_P645637 | AK029856  | Senp8     | 71599  | SUMO/sentrin specific peptidase 8                                   | -3.66 | 0.64 | 0.24 |
| A_51_P300666 | NM_153288 | Npb       | 208990 | neuropeptide B                                                      | -3.33 | 0.64 | 0.40 |
| A_52_P372046 | NM_025584 | Cd99      | 673094 | CD99 antigen                                                        | -6.08 | 0.64 | 0.00 |
| A_51_P234853 | NM_023374 | Sdhb      | 67680  | succinate dehydrogenase complex, subunit B, iron sulfur             | -4.00 | 0.64 | 0.12 |
| A_51_P430071 | NM_178214 | Hist2h2be | 319190 | histone cluster 2, H2be                                             | -3.35 | 0.64 | 0.38 |
| A_51_P370090 | NM_008808 | Pdgfa     | 18590  | platelet derived growth factor, alpha                               | -3.02 | 0.64 | 0.70 |
| A_51_P325491 | NM_025368 | Josd2     | 66124  | Josephin domain containing 2                                        | -3.62 | 0.64 | 0.25 |
| A_52_P632617 | NM_175491 | Smcr8     | 237782 | Smith-Magenis syndrome chromosome region, candidate                 | -3.83 | 0.64 | 0.18 |
| A_52_P608132 | NM_001024 | Snx32     | 225861 | sorting nexin 32                                                    | -2.89 | 0.64 | 0.89 |
| A_52_P567056 | NM_001048 | 2810008M  | 75616  | RIKEN cDNA 2810008M24 gene                                          | -3.02 | 0.64 | 0.70 |
| A_51_P505719 | AY590892  | Dmxl1     | 240283 | Dmx-like 1                                                          | -3.99 | 0.64 | 0.12 |
| A_51_P512503 | NM_011794 | Bpnt1     | 23827  | bisphosphate 3'-nucleotidase 1                                      | -3.23 | 0.64 | 0.48 |
| A_52_P315328 | NA        | NA        | NA     | NA                                                                  | -3.14 | 0.64 | 0.58 |
| A_52_P238846 | NM_011794 | Bpnt1     | 23827  | bisphosphate 3'-nucleotidase 1                                      | -2.90 | 0.64 | 0.87 |
| A_52_P622067 | NM_029600 | Abcc3     | 76408  | ATP-binding cassette, sub-family C (CFTR/MRP), member               | -5.35 | 0.64 | 0.00 |
| A_52_P640355 | NM_027862 | Atp5h     | 71679  | ATP synthase, H <sup>+</sup> transporting, mitochondrial F0 complex | -4.21 | 0.64 | 0.12 |
| A_52_P122664 | NM_010264 | Nr6a1     | 14536  | nuclear receptor subfamily 6, group A, member 1                     | -3.65 | 0.64 | 0.24 |
| A_51_P183107 | NM_175226 | Rnf139    | 75841  | ring finger protein 139                                             | -4.05 | 0.64 | 0.13 |
| A_52_P431770 | NA        | NA        | NA     | NA                                                                  | -3.12 | 0.64 | 0.60 |
| A_52_P18068  | NM_178935 | 4932441K1 | 353170 | RIKEN cDNA 4932441K18 gene                                          | -2.97 | 0.64 | 0.74 |
| A_51_P385749 | NM_026902 | Mcts1     | 68995  | malignant T cell amplified sequence 1                               | -2.81 | 0.64 | 1.02 |
| A_51_P393193 | NM_144511 | Gm4738    | 13909  | predicted gene 4738                                                 | -3.79 | 0.64 | 0.17 |
| A_52_P559817 | NM_024237 | Fbln7     | 70370  | fibulin 7                                                           | -2.92 | 0.64 | 0.82 |
| A_52_P29765  | AK002667  | Cmc1      | 67899  | COX assembly mitochondrial protein homolog ( <i>S. cerevisi</i>     | -2.98 | 0.64 | 0.72 |
| A_51_P493270 | NM_029963 | Mrps5     | 77721  | mitochondrial ribosomal protein S5                                  | -3.62 | 0.64 | 0.25 |
| A_52_P44760  | NM_001003 | Mars      | 216443 | methionine-tRNA synthetase                                          | -3.02 | 0.64 | 0.70 |
| A_51_P191077 | NM_207683 | Pik3c2g   | 18705  | phosphatidylinositol 3-kinase, C2 domain containing, gan            | -2.93 | 0.64 | 0.81 |
| A_52_P463143 | NM_016742 | Cdc37     | 12539  | cell division cycle 37 homolog ( <i>S. cerevisiae</i> )             | -2.87 | 0.63 | 0.92 |
| A_51_P133953 | AV030849  | NA        | NA     | NA                                                                  | -3.02 | 0.63 | 0.70 |
| A_52_P389347 | NM_023348 | Snap29    | 67474  | synaptosomal-associated protein 29                                  | -4.15 | 0.63 | 0.11 |
| A_52_P54516  | NM_029752 | Bri3bp    | 76809  | Bri3 binding protein                                                | -3.03 | 0.63 | 0.68 |
| A_52_P348189 | NM_027221 | Krtcap3   | 69815  | keratinocyte associated protein 3                                   | -3.05 | 0.63 | 0.66 |
| A_51_P193935 | NM_008650 | Mut       | 17850  | methyalmalonyl-Coenzyme A mutase                                    | -3.15 | 0.63 | 0.55 |

|              |           |           |        |                                                             |       |      |      |
|--------------|-----------|-----------|--------|-------------------------------------------------------------|-------|------|------|
| A_52_P653932 | NM_025780 | Thap2     | 66816  | THAP domain containing, apoptosis associated protein 2      | -3.22 | 0.63 | 0.49 |
| A_51_P408082 | NM_009692 | Apoa1     | 11806  | apolipoprotein A-I                                          | -3.60 | 0.63 | 0.26 |
| A_52_P250865 | CJ243128  | NA        | NA     | NA                                                          | -2.91 | 0.63 | 0.85 |
| A_51_P234544 | NM_018745 | Azin1     | 54375  | antizyme inhibitor 1                                        | -3.46 | 0.63 | 0.33 |
| A_52_P297276 | NM_177616 | Ccdc157   | 216516 | coiled-coil domain containing 157                           | -3.77 | 0.63 | 0.19 |
| A_51_P515937 | NM_144908 | Galnt11   | 231050 | UDP-N-acetyl-alpha-D-galactosamine:polypeptide N-acet       | -2.83 | 0.63 | 0.98 |
| A_51_P481293 | NM_026949 | Cnot8     | 69125  | CCR4-NOT transcription complex, subunit 8                   | -3.45 | 0.63 | 0.33 |
| A_52_P674808 | NA        | NA        | NA     | NA                                                          | -3.80 | 0.63 | 0.17 |
| A_51_P442990 | NM_028233 | Lrpprc    | 72416  | leucine-rich PPR-motif containing                           | -3.65 | 0.63 | 0.24 |
| A_52_P606303 | NM_053159 | Mrpl3     | 94062  | mitochondrial ribosomal protein L3                          | -5.01 | 0.63 | 0.00 |
| A_51_P416408 | NM_181820 | Tmc4      | 353499 | transmembrane channel-like gene family 4                    | -2.87 | 0.63 | 0.92 |
| A_51_P419086 | NM_183358 | Gadd45gip | 102060 | growth arrest and DNA-damage-inducible, gamma intera        | -2.82 | 0.63 | 0.99 |
| A_51_P386612 | NM_027153 | Pir       | 69656  | pirin                                                       | -2.89 | 0.63 | 0.87 |
| A_51_P155966 | NM_029797 | Mnd1      | 76915  | meiotic nuclear divisions 1 homolog (S. cerevisiae)         | -3.16 | 0.63 | 0.55 |
| A_52_P909310 | NM_011694 | Vdac1     | 22333  | voltage-dependent anion channel 1                           | -4.73 | 0.63 | 0.06 |
| A_51_P383857 | NM_031499 | Prp2      | 83380  | proline rich protein 2                                      | -3.04 | 0.63 | 0.67 |
| A_52_P519538 | NM_172712 | Uba6      | 231380 | ubiquitin-like modifier activating enzyme 6                 | -2.82 | 0.63 | 0.99 |
| A_52_P463968 | NM_008738 | Nrtn      | 18188  | neurturin                                                   | -4.75 | 0.63 | 0.07 |
| A_51_P129557 | NM_028756 | Slc35a5   | 74102  | solute carrier family 35, member A5                         | -3.14 | 0.63 | 0.58 |
| A_52_P569276 | NM_001003 | Masp2     | 17175  | mannan-binding lectin serine peptidase 2                    | -3.28 | 0.63 | 0.42 |
| A_51_P300506 | NM_183405 | Cox6b2    | 333182 | cytochrome c oxidase subunit VIb polypeptide 2              | -2.97 | 0.63 | 0.75 |
| A_51_P272586 | NM_027727 | Dym       | 69190  | dymeclin                                                    | -3.02 | 0.63 | 0.70 |
| A_52_P528634 | NM_152817 | Ttc27     | 74196  | tetratricopeptide repeat domain 27                          | -3.39 | 0.63 | 0.36 |
| A_51_P365468 | NM_009191 | Clpb      | 20480  | ClpB caseinolytic peptidase B homolog (E. coli)             | -4.99 | 0.63 | 0.00 |
| A_51_P106799 | NM_011146 | Pparg     | 19016  | peroxisome proliferator activated receptor gamma            | -3.78 | 0.63 | 0.19 |
| A_51_P191700 | NM_009929 | Col18a1   | 12822  | collagen, type XVIII, alpha 1                               | -3.89 | 0.63 | 0.16 |
| A_51_P298997 | NM_177266 | Gfm2      | 320806 | G elongation factor, mitochondrial 2                        | -4.42 | 0.63 | 0.09 |
| A_51_P409559 | AK043558  | NA        | NA     | NA                                                          | -3.42 | 0.63 | 0.34 |
| A_51_P466270 | NM_010417 | Heph      | 15203  | hephaestin                                                  | -4.21 | 0.63 | 0.11 |
| A_51_P220414 | NM_019941 | Zfp235    | 56525  | zinc finger protein 235                                     | -3.81 | 0.63 | 0.17 |
| A_51_P293575 | AK089462  | 4930402H2 | 228602 | RIKEN cDNA 4930402H24 gene                                  | -2.99 | 0.63 | 0.72 |
| A_51_P191865 | U12147    | Lama2     | 16773  | laminin, alpha 2                                            | -3.96 | 0.63 | 0.15 |
| A_52_P553171 | NM_178622 | Suds3     | 71954  | suppressor of defective silencing 3 homolog (S. cerevisiae) | -5.51 | 0.62 | 0.00 |
| A_51_P467770 | NM_028874 | Snx19     | 102607 | sorting nexin 19                                            | -2.86 | 0.62 | 0.93 |

|              |           |          |        |                                                          |       |      |      |
|--------------|-----------|----------|--------|----------------------------------------------------------|-------|------|------|
| A_51_P141772 | NM_144873 | Uhrf2    | 109113 | ubiquitin-like, containing PHD and RING finger domains 2 | -4.01 | 0.62 | 0.12 |
| A_52_P260629 | NM_027769 | Cpne3    | 70568  | copine III                                               | -4.02 | 0.62 | 0.12 |
| A_51_P387248 | NM_134135 | Slc39a3  | 106947 | solute carrier family 39 (zinc transporter), member 3    | -3.74 | 0.62 | 0.21 |
| A_52_P917365 | AV141866  | NA       | NA     | NA                                                       | -3.47 | 0.62 | 0.32 |
| A_51_P424709 | NM_183297 | Nxph4    | 104080 | neurexophilin 4                                          | -3.10 | 0.62 | 0.60 |
| A_52_P234695 | XM_896388 | NA       | NA     | NA                                                       | -3.32 | 0.62 | 0.40 |
| A_51_P381360 | NM_023312 | Ndufa13  | 67184  | NADH dehydrogenase (ubiquinone) 1 alpha subcomplex,      | -5.09 | 0.62 | 0.00 |
| A_51_P238734 | NM_178620 | Mfsd11   | 69900  | major facilitator superfamily domain containing 11       | -3.33 | 0.62 | 0.40 |
| A_51_P506045 | NM_176073 | Pgcp     | 54381  | plasma glutamate carboxypeptidase                        | -3.32 | 0.62 | 0.40 |
| A_52_P405795 | AK054073  | Zfp826   | 414758 | zinc finger protein 826                                  | -2.91 | 0.62 | 0.85 |
| A_51_P269554 | NM_010439 | Hmgb1    | 15289  | high mobility group box 1                                | -3.44 | 0.62 | 0.35 |
| A_51_P151214 | NM_133882 | C8b      | 110382 | complement component 8, beta polypeptide                 | -3.29 | 0.62 | 0.43 |
| A_52_P105801 | AK140163  | Arsb     | 11881  | arylsulfatase B                                          | -3.26 | 0.62 | 0.46 |
| A_51_P381763 | Z14986    | Amd1     | 11702  | S-adenosylmethionine decarboxylase 1                     | -3.10 | 0.62 | 0.60 |
| A_52_P137293 | BC038492  | Stradb   | 227154 | STE20-related kinase adaptor beta                        | -3.42 | 0.62 | 0.34 |
| A_52_P595140 | NM_198030 | Hsd17b13 | 243168 | hydroxysteroid (17-beta) dehydrogenase 13                | -2.92 | 0.62 | 0.82 |
| A_52_P276848 | AK035801  | NA       | NA     | NA                                                       | -4.79 | 0.62 | 0.07 |
| A_51_P431734 | NM_177869 | Fam185a  | 330050 | family with sequence similarity 185, member A            | -3.10 | 0.62 | 0.60 |
| A_51_P369311 | NM_015760 | Nox4     | 50490  | NADPH oxidase 4                                          | -3.37 | 0.62 | 0.37 |
| A_52_P319161 | NM_019641 | Stmn1    | 16765  | stathmin 1                                               | -2.89 | 0.62 | 0.87 |
| A_52_P392121 | NM_028763 | Cbx6     | 494448 | chromobox homolog 6                                      | -3.02 | 0.62 | 0.70 |
| A_52_P33067  | AK080164  | NA       | NA     | NA                                                       | -3.30 | 0.62 | 0.43 |
| A_51_P438293 | AK133701  | Smarcal1 | 54380  | SWI/SNF related matrix associated, actin dependent regu  | -3.52 | 0.62 | 0.29 |
| A_51_P157554 | NM_012047 | Brd7     | 26992  | bromodomain containing 7                                 | -4.16 | 0.62 | 0.11 |
| A_52_P94201  | NM_009306 | Syt1     | 20979  | synaptotagmin I                                          | -3.87 | 0.62 | 0.16 |
| A_52_P590392 | NM_016676 | Rab10    | 19325  | RAB10, member RAS oncogene family                        | -3.65 | 0.62 | 0.24 |
| A_51_P448464 | NM_010767 | Masp2    | 17175  | mannan-binding lectin serine peptidase 2                 | -3.29 | 0.62 | 0.43 |
| A_52_P33498  | NM_026697 | Rab14    | 68365  | RAB14, member RAS oncogene family                        | -2.83 | 0.62 | 0.98 |
| A_52_P173526 | XM_287555 | Thsd7a   | 330267 | thrombospondin, type I, domain containing 7A             | -3.26 | 0.62 | 0.45 |
| A_52_P380465 | NM_001035 | Zfp748   | 212276 | zinc finger protein 748                                  | -3.99 | 0.62 | 0.12 |
| A_52_P471143 | AK151452  | Pusl1    | 433813 | pseudouridylate synthase-like 1                          | -4.86 | 0.62 | 0.07 |
| A_51_P336161 | NM_010764 | Man2b1   | 17159  | mannosidase 2, alpha B1                                  | -5.37 | 0.62 | 0.00 |
| A_51_P110341 | NM_170727 | Scgb3a1  | 68662  | secretoglobin, family 3A, member 1                       | -3.95 | 0.62 | 0.14 |
| A_51_P143855 | NM_026402 | Atg3     | 67841  | autophagy-related 3 (yeast)                              | -3.63 | 0.62 | 0.25 |

|              |           |           |        |                                                                     |  |       |      |      |
|--------------|-----------|-----------|--------|---------------------------------------------------------------------|--|-------|------|------|
| A_51_P502107 | XM_355637 | NA        | NA     | NA                                                                  |  | -3.06 | 0.62 | 0.65 |
| A_51_P435198 | NM_009968 | Cryz      | 12972  | crystallin, zeta                                                    |  | -3.80 | 0.62 | 0.17 |
| A_51_P358037 | BC026627  | Abi3bp    | 320712 | ABI gene family, member 3 (NESH) binding protein                    |  | -4.49 | 0.62 | 0.05 |
| A_52_P14444  | NM_027250 | 2010305A1 | 69893  | RIKEN cDNA 2010305A19 gene                                          |  | -3.54 | 0.62 | 0.29 |
| A_51_P432659 | NM_008822 | Pex7      | 18634  | peroxisomal biogenesis factor 7                                     |  | -3.37 | 0.62 | 0.38 |
| A_51_P520139 | XM_620762 | Gm5918    | 546143 | predicted gene 5918                                                 |  | -3.04 | 0.62 | 0.67 |
| A_51_P119715 | NM_026794 | Deb1      | 26901  | differentially expressed in B16F10 1                                |  | -2.86 | 0.62 | 0.92 |
| A_52_P117313 | NM_018745 | Azin1     | 54375  | antizyme inhibitor 1                                                |  | -6.16 | 0.62 | 0.00 |
| A_51_P201904 | NM_025316 | Ndufb5    | 66046  | NADH dehydrogenase (ubiquinone) 1 beta subcomplex, 5                |  | -2.88 | 0.62 | 0.91 |
| A_51_P291260 | XM_976153 | NA        | NA     | NA                                                                  |  | -3.32 | 0.62 | 0.40 |
| A_51_P277588 | XM_884719 | NA        | NA     | NA                                                                  |  | -3.84 | 0.62 | 0.18 |
| A_51_P502225 | NM_019687 | Slc22a4   | 30805  | solute carrier family 22 (organic cation transporter), men          |  | -2.88 | 0.62 | 0.91 |
| A_51_P495485 | NM_028264 | Tmem55a   | 72519  | transmembrane protein 55A                                           |  | -3.16 | 0.62 | 0.55 |
| A_52_P98100  | AK161732  | Dcxr      | 67880  | dicarbonyl L-xylulose reductase                                     |  | -3.41 | 0.62 | 0.34 |
| A_51_P150996 | AK032738  | 6720422M  | 99946  | RIKEN cDNA 6720422M22 gene                                          |  | -4.83 | 0.62 | 0.07 |
| A_52_P314421 | AK047174  | Fbxo30    | 71865  | F-box protein 30                                                    |  | -4.09 | 0.62 | 0.10 |
| A_52_P297113 | NM_013584 | Lifr      | 16880  | leukemia inhibitory factor receptor                                 |  | -3.55 | 0.62 | 0.27 |
| A_52_P560620 | NM_145215 | Abhd11    | 68758  | abhydrolase domain containing 11                                    |  | -2.91 | 0.62 | 0.85 |
| A_51_P413097 | NM_027421 | Ints2     | 70422  | integrator complex subunit 2                                        |  | -2.98 | 0.62 | 0.72 |
| A_52_P282905 | XM_901524 | NA        | NA     | NA                                                                  |  | -3.13 | 0.62 | 0.58 |
| A_51_P483483 | NM_028726 | 4632404H1 | 74034  | RIKEN cDNA 4632404H12 gene                                          |  | -2.86 | 0.62 | 0.93 |
| A_51_P247441 | NM_144870 | Ndufs8    | 225887 | NADH dehydrogenase (ubiquinone) Fe-S protein 8                      |  | -3.64 | 0.62 | 0.24 |
| A_52_P7183   | BC033455  | 0610007L0 | 71667  | RIKEN cDNA 0610007L01 gene                                          |  | -3.04 | 0.62 | 0.67 |
| A_51_P211880 | NM_030026 | Mccc2     | 78038  | methylcrotonoyl-Coenzyme A carboxylase 2 (beta)                     |  | -3.18 | 0.62 | 0.53 |
| A_51_P106952 | BC029079  | Rbm26     | 74213  | RNA binding motif protein 26                                        |  | -5.01 | 0.62 | 0.00 |
| A_51_P453398 | AK122546  | 2310044G1 | 217732 | RIKEN cDNA 2310044G17 gene                                          |  | -3.69 | 0.62 | 0.22 |
| A_51_P173961 | NM_178939 | Pdrg1     | 68559  | p53 and DNA damage regulated 1                                      |  | -3.03 | 0.61 | 0.68 |
| A_52_P603290 | AB015858  | Mycbp     | 56309  | c-myc binding protein                                               |  | -4.13 | 0.61 | 0.10 |
| A_52_P599238 | NM_026274 | Rspry1    | 67610  | ring finger and SPRY domain containing 1                            |  | -3.50 | 0.61 | 0.31 |
| A_51_P378807 | XM_126489 | NA        | NA     | NA                                                                  |  | -3.05 | 0.61 | 0.66 |
| A_51_P378087 | NM_020615 | Atp5c1    | 11949  | ATP synthase, H <sup>+</sup> transporting, mitochondrial F1 complex |  | -5.49 | 0.61 | 0.00 |
| A_52_P412506 | NM_008649 | Mup5      | 17844  | major urinary protein 5                                             |  | -3.80 | 0.61 | 0.17 |
| A_52_P32683  | XM_001002 | NA        | NA     | NA                                                                  |  | -3.02 | 0.61 | 0.70 |
| A_51_P247184 | NM_008728 | Npr3      | 18162  | natriuretic peptide receptor 3                                      |  | -4.52 | 0.61 | 0.05 |

|               |           |                 |        |                                                           |       |      |      |
|---------------|-----------|-----------------|--------|-----------------------------------------------------------|-------|------|------|
| A_52_P656418  | AK145182  | Met             | 17295  | met proto-oncogene                                        | -3.56 | 0.61 | 0.27 |
| A_52_P682982  | NM_013742 | Cars            | 27267  | cysteinyl-tRNA synthetase                                 | -4.41 | 0.61 | 0.09 |
| A_51_P472372  | BC061503  | Ttc17           | 74569  | tetratricopeptide repeat domain 17                        | -3.42 | 0.61 | 0.34 |
| A_52_P478790  | NA        | NA              | NA     | NA                                                        | -5.49 | 0.61 | 0.00 |
| A_51_P116137  | NM_008377 | Lrig1           | 16206  | leucine-rich repeats and immunoglobulin-like domains 1    | -3.78 | 0.61 | 0.19 |
| A_51_P511646  | NM_029561 | Ndfip2          | 76273  | Nedd4 family interacting protein 2                        | -2.99 | 0.61 | 0.71 |
| A_52_P324042  | BC037008  | Serpina1b       | 20701  | serine (or cysteine) preptidase inhibitor, clade A, membe | -5.85 | 0.61 | 0.00 |
| A_52_P398974  | NM_012065 | Pde6g           | 18588  | phosphodiesterase 6G, cGMP-specific, rod, gamma           | -3.46 | 0.61 | 0.33 |
| A_51_P234470  | AF213390  | lpo8            | 320727 | importin 8                                                | -2.99 | 0.61 | 0.72 |
| A_52_P477269  | NA        | NA              | NA     | NA                                                        | -3.02 | 0.61 | 0.70 |
| A_52_P1131944 | AK037456  | A130019P1399617 |        | RIKEN cDNA A130019P10 gene                                | -3.22 | 0.61 | 0.49 |
| A_52_P190744  | NM_001038 | Rnpc3           | 67225  | RNA-binding region (RNP1, RRM) containing 3               | -4.42 | 0.61 | 0.09 |
| A_52_P601021  | NM_026979 | C1qtnf2         | 69183  | C1q and tumor necrosis factor related protein 2           | -3.00 | 0.61 | 0.70 |
| A_52_P432570  | NM_175343 | Chdh            | 218865 | choline dehydrogenase                                     | -2.91 | 0.61 | 0.85 |
| A_51_P153053  | NM_020561 | Smpd3a          | 57319  | sphingomyelin phosphodiesterase, acid-like 3A             | -4.36 | 0.61 | 0.09 |
| A_52_P74144   | BC034114  | Snx29           | 74478  | sorting nexin 29                                          | -3.21 | 0.61 | 0.50 |
| A_52_P5982    | AK032421  | Clpb            | 20480  | ClpB caseinolytic peptidase B homolog (E. coli)           | -4.71 | 0.61 | 0.06 |
| A_51_P414160  | NM_027935 | Tmem50a         | 71817  | transmembrane protein 50A                                 | -3.73 | 0.61 | 0.21 |
| A_52_P559557  | NM_001033 | BC026585        | 226527 | cDNA sequence BC026585                                    | -2.88 | 0.61 | 0.89 |
| A_52_P964362  | AW455994  | NA              | NA     | NA                                                        | -3.57 | 0.61 | 0.27 |
| A_51_P127297  | NM_008288 | Hsd11b1         | 15483  | hydroxysteroid 11-beta dehydrogenase 1                    | -3.12 | 0.61 | 0.60 |
| A_51_P423859  | NM_007601 | Capn3           | 12335  | calpain 3                                                 | -3.33 | 0.61 | 0.40 |
| A_51_P437697  | NM_011826 | Hax1            | 23897  | HCLS1 associated X-1                                      | -3.41 | 0.61 | 0.34 |
| A_51_P319449  | NM_144784 | Acat1           | 110446 | acetyl-Coenzyme A acetyltransferase 1                     | -3.71 | 0.61 | 0.20 |
| A_51_P295610  | NM_025567 | Cyc1            | 66445  | cytochrome c-1                                            | -3.56 | 0.61 | 0.28 |
| A_51_P196605  | NM_026880 | Pink1           | 68943  | PTEN induced putative kinase 1                            | -2.81 | 0.61 | 1.02 |
| A_52_P296682  | NM_030262 | Pofut2          | 80294  | protein O-fucosyltransferase 2                            | -3.34 | 0.61 | 0.40 |
| A_52_P335892  | BC056383  | Luc7l2          | 192196 | LUC7-like 2 (S. cerevisiae)                               | -3.62 | 0.61 | 0.25 |
| A_51_P452323  | NM_016701 | Nes             | 18008  | nestin                                                    | -3.01 | 0.61 | 0.70 |
| A_51_P210350  | NM_182959 | Slc17a8         | 216227 | solute carrier family 17 (sodium-dependent inorganic ph   | -3.83 | 0.61 | 0.18 |
| A_51_P106373  | NM_025321 | Sdhc            | 66052  | succinate dehydrogenase complex, subunit C, integral me   | -3.75 | 0.61 | 0.21 |
| A_52_P635250  | AK051570  | Lrrc16a         | 68732  | leucine rich repeat containing 16A                        | -3.53 | 0.61 | 0.28 |
| A_51_P474709  | AK008216  | Ccdc109a        | 215999 | coiled-coil domain containing 109A                        | -3.31 | 0.61 | 0.40 |
| A_52_P893095  | NA        | NA              | NA     | NA                                                        | -5.16 | 0.61 | 0.00 |



|              |           |                 |        |                                                                |       |      |      |
|--------------|-----------|-----------------|--------|----------------------------------------------------------------|-------|------|------|
| A_51_P308961 | NM_008254 | Hmgcl           | 15356  | 3-hydroxy-3-methylglutaryl-Coenzyme A lyase                    | -5.55 | 0.61 | 0.00 |
| A_52_P321318 | BC012020  | NA              | NA     | NA                                                             | -3.25 | 0.60 | 0.47 |
| A_51_P295797 | AK005616  | Ccdc30          | 73332  | coiled-coil domain containing 30                               | -2.81 | 0.60 | 1.02 |
| A_51_P269084 | NM_175329 | Chchd10         | 103172 | coiled-coil-helix-coiled-coil-helix domain containing 10       | -4.25 | 0.60 | 0.08 |
| A_52_P346037 | NM_013777 | Akr1c12         | 622402 | aldo-keto reductase family 1, member C12                       | -2.97 | 0.60 | 0.75 |
| A_52_P677963 | NM_026951 | Pex11c          | 69129  | peroxisomal biogenesis factor 11 gamma                         | -3.16 | 0.60 | 0.55 |
| A_51_P494622 | AK144842  | Ttc13           | 234875 | tetratricopeptide repeat domain 13                             | -4.05 | 0.60 | 0.13 |
| A_51_P109835 | NM_025407 | Uqcrc1          | 22273  | ubiquinol-cytochrome c reductase core protein 1                | -6.30 | 0.60 | 0.00 |
| A_52_P172711 | AK080470  | Srr             | 27364  | serine racemase                                                | -3.32 | 0.60 | 0.40 |
| A_52_P375939 | AK029391  | Pex11c          | 69129  | peroxisomal biogenesis factor 11 gamma                         | -3.98 | 0.60 | 0.12 |
| A_52_P174872 | AK028820  | C030015A177418  |        | RIKEN cDNA C030015A19 gene                                     | -2.99 | 0.60 | 0.72 |
| A_51_P470414 | NM_138600 | Aldh7a1         | 110695 | aldehyde dehydrogenase family 7, member A1                     | -4.91 | 0.60 | 0.08 |
| A_51_P256842 | NM_029887 | Yif1b           | 77254  | Yip1 interacting factor homolog B ( <i>S. cerevisiae</i> )     | -3.28 | 0.60 | 0.42 |
| A_52_P321584 | NA        | NA              | NA     | NA                                                             | -2.84 | 0.60 | 0.96 |
| A_51_P296796 | NM_027289 | Nt5dc2          | 70021  | 5'-nucleotidase domain containing 2                            | -3.54 | 0.60 | 0.29 |
| A_52_P24843  | NM_008960 | Pten            | 19211  | phosphatase and tensin homolog                                 | -3.11 | 0.60 | 0.60 |
| A_51_P172475 | NM_011309 | S100a1          | 20193  | S100 calcium binding protein A1                                | -3.27 | 0.60 | 0.45 |
| A_51_P284867 | AK052031  | D230038C2328872 |        | hypothetical protein D230038C21                                | -3.46 | 0.60 | 0.33 |
| A_52_P31155  | NM_177577 | Dcdc2a          | 195208 | doublecortin domain containing 2a                              | -2.96 | 0.60 | 0.76 |
| A_51_P334318 | NM_027363 | 2010110P070261  |        | RIKEN cDNA 2010110P09 gene                                     | -2.83 | 0.60 | 0.98 |
| A_52_P134899 | NM_001044 | Zfp2            | 22678  | zinc finger protein 2                                          | -3.14 | 0.60 | 0.58 |
| A_51_P512627 | NM_021482 | Syngn4          | 58867  | synaptogyrin 4                                                 | -2.94 | 0.60 | 0.79 |
| A_51_P344407 | NM_013543 | H2-Ke6          | 14979  | H2-K region expressed gene 6                                   | -3.65 | 0.60 | 0.24 |
| A_51_P367343 | NM_013716 | G3bp1           | 27041  | Ras-GTPase-activating protein SH3-domain binding prote         | -4.04 | 0.60 | 0.13 |
| A_52_P244132 | NM_025478 | Isoc1           | 66307  | isochorismatase domain containing 1                            | -3.71 | 0.60 | 0.20 |
| A_52_P638895 | NM_001025 | Vegfa           | 22339  | vascular endothelial growth factor A                           | -3.26 | 0.60 | 0.45 |
| A_51_P449777 | NM_022995 | Pmepa1          | 65112  | prostate transmembrane protein, androgen induced 1             | -3.63 | 0.60 | 0.25 |
| A_51_P132625 | NM_053262 | Hsd17b11        | 114664 | hydroxysteroid (17-beta) dehydrogenase 11                      | -4.63 | 0.60 | 0.06 |
| A_51_P158598 | NM_146027 | Scrn2           | 217140 | secernin 2                                                     | -2.81 | 0.60 | 1.02 |
| A_52_P307142 | XM_895387 | 2210408F273652  |        | RIKEN cDNA 2210408F21 gene                                     | -2.95 | 0.60 | 0.78 |
| A_51_P168171 | NM_024168 | Tsen34          | 66078  | tRNA splicing endonuclease 34 homolog ( <i>S. cerevisiae</i> ) | -3.00 | 0.60 | 0.71 |
| A_52_P323259 | NA        | NA              | NA     | NA                                                             | -2.93 | 0.60 | 0.81 |
| A_52_P331215 | AK161721  | Tlcd1           | 68385  | TLC domain containing 1                                        | -3.16 | 0.60 | 0.55 |
| A_51_P352381 | NM_030686 | Dhrs4           | 28200  | dehydrogenase/reductase (SDR family) member 4                  | -3.75 | 0.60 | 0.21 |

|              |           |          |        |                                                             |       |      |      |
|--------------|-----------|----------|--------|-------------------------------------------------------------|-------|------|------|
| A_52_P299535 | NM_134117 | Pkdcc    | 106522 | protein kinase domain containing, cytoplasmic               | -3.13 | 0.60 | 0.58 |
| A_52_P542496 | NM_130861 | Slco1a5  | 108096 | solute carrier organic anion transporter family, member :   | -5.26 | 0.60 | 0.00 |
| A_51_P113403 | NM_178743 | Slc26a11 | 268512 | solute carrier family 26, member 11                         | -3.39 | 0.60 | 0.36 |
| A_52_P604025 | AK032842  | Gm5081   | 328099 | predicted gene 5081                                         | -2.97 | 0.60 | 0.74 |
| A_52_P431872 | NM_027275 | Ptcd3    | 69956  | pentatricopeptide repeat domain 3                           | -2.84 | 0.60 | 0.96 |
| A_51_P272993 | NM_172290 | Ntm      | 235106 | neurotrimin                                                 | -7.99 | 0.60 | 0.00 |
| A_52_P348038 | NM_016663 | Syt3     | 20981  | synaptotagmin III                                           | -4.06 | 0.60 | 0.13 |
| A_51_P272817 | NM_008928 | Map2k3   | 26397  | mitogen-activated protein kinase kinase 3                   | -3.04 | 0.60 | 0.68 |
| A_52_P385896 | NM_001038 | Atp8a1   | 11980  | ATPase, aminophospholipid transporter (APLT), class I, ty   | -3.53 | 0.60 | 0.29 |
| A_51_P496309 | NM_001024 | Rfx4     | 71137  | regulatory factor X, 4 (influences HLA class II expression) | -3.82 | 0.60 | 0.18 |
| A_52_P236176 | AK011873  | Cct4     | 12464  | chaperonin containing Tcp1, subunit 4 (delta)               | -2.84 | 0.60 | 0.96 |
| A_52_P202055 | NM_144545 | Eif3j    | 78655  | eukaryotic translation initiation factor 3, subunit J       | -4.18 | 0.60 | 0.11 |
| A_52_P519416 | BC060186  | Rbbp5    | 213464 | retinoblastoma binding protein 5                            | -3.60 | 0.60 | 0.26 |
| A_52_P963729 | AK053988  | NA       | NA     | NA                                                          | -3.08 | 0.60 | 0.62 |
| A_52_P134530 | AK152971  | Rbm47    | 245945 | RNA binding motif protein 47                                | -6.34 | 0.60 | 0.00 |
| A_51_P319879 | NM_007382 | Acadm    | 11364  | acyl-Coenzyme A dehydrogenase, medium chain                 | -4.58 | 0.60 | 0.06 |
| A_51_P402435 | NM_026508 | Trap1    | 68015  | TNF receptor-associated protein 1                           | -4.38 | 0.60 | 0.09 |
| A_51_P207636 | NM_016774 | Atp5b    | 11947  | ATP synthase, H+ transporting mitochondrial F1 complex      | -4.70 | 0.60 | 0.06 |
| A_51_P294550 | NM_019829 | Stx5a    | 56389  | syntaxin 5A                                                 | -3.18 | 0.59 | 0.53 |
| A_51_P302588 | NM_025313 | Atp5d    | 66043  | ATP synthase, H+ transporting, mitochondrial F1 complex     | -3.73 | 0.59 | 0.21 |
| A_51_P324410 | NM_016862 | Vti1a    | 53611  | vesicle transport through interaction with t-SNAREs hom     | -2.81 | 0.59 | 1.02 |
| A_51_P162313 | NM_183099 | Tssk5    | 73542  | testis-specific serine kinase 5                             | -3.60 | 0.59 | 0.26 |
| A_52_P499980 | NM_146135 | Pias3    | 229615 | protein inhibitor of activated STAT 3                       | -4.38 | 0.59 | 0.09 |
| A_51_P131084 | NM_145615 | Etfa     | 110842 | electron transferring flavoprotein, alpha polypeptide       | -5.32 | 0.59 | 0.00 |
| A_51_P418259 | NM_025835 | Pccb     | 66904  | propionyl Coenzyme A carboxylase, beta polypeptide          | -4.44 | 0.59 | 0.10 |
| A_51_P491227 | NM_019879 | Suclg1   | 56451  | succinate-CoA ligase, GDP-forming, alpha subunit            | -6.83 | 0.59 | 0.00 |
| A_52_P144285 | NM_175382 | Fam72a   | 108900 | family with sequence similarity 72, member A                | -3.10 | 0.59 | 0.60 |
| A_51_P266964 | NM_177732 | Slc35d1  | 242585 | solute carrier family 35 (UDP-glucuronic acid/UDP-N-acet    | -4.01 | 0.59 | 0.12 |
| A_52_P532841 | NM_146170 | C87436   | 232196 | expressed sequence C87436                                   | -3.66 | 0.59 | 0.24 |
| A_51_P402414 | NM_025504 | Atp5sl   | 66349  | ATP5S-like                                                  | -3.16 | 0.59 | 0.55 |
| A_52_P620893 | BC030311  | Armc8    | 74125  | armadillo repeat containing 8                               | -4.75 | 0.59 | 0.07 |
| A_52_P650288 | NM_029963 | Mrps5    | 77721  | mitochondrial ribosomal protein S5                          | -4.00 | 0.59 | 0.12 |
| A_52_P394111 | NA        | NA       | NA     | NA                                                          | -4.23 | 0.59 | 0.08 |
| A_51_P516097 | AK147204  | Cyld     | 74256  | cylindromatosis (turban tumor syndrome)                     | -2.82 | 0.59 | 0.99 |

|               |           |           |        |                                                              |       |      |      |
|---------------|-----------|-----------|--------|--------------------------------------------------------------|-------|------|------|
| A_51_P435817  | NM_028603 | Zbtb8a    | 73680  | zinc finger and BTB domain containing 8a                     | -3.06 | 0.59 | 0.65 |
| A_52_P327927  | NA        | NA        | NA     | NA                                                           | -4.10 | 0.59 | 0.10 |
| A_52_P598478  | AK145337  | Chchd3    | 66075  | coiled-coil-helix-coiled-coil-helix domain containing 3      | -3.08 | 0.59 | 0.62 |
| A_51_P252859  | NM_010516 | Cyr61     | 16007  | cysteine rich protein 61                                     | -2.95 | 0.59 | 0.78 |
| A_51_P285413  | NM_175023 | Rbbp6     | 19647  | retinoblastoma binding protein 6                             | -3.06 | 0.59 | 0.65 |
| A_52_P598495  | NM_009245 | Serpina1c | 20702  | serine (or cysteine) peptidase inhibitor, clade A, member    | -3.99 | 0.59 | 0.12 |
| A_51_P135394  | NM_019758 | Mtch2     | 56428  | mitochondrial carrier homolog 2 (C. elegans)                 | -4.20 | 0.59 | 0.11 |
| A_52_P354306  | NM_028730 | Pex26     | 74043  | peroxisomal biogenesis factor 26                             | -3.83 | 0.59 | 0.18 |
| A_52_P432787  | NM_026794 | Deb1      | 26901  | differentially expressed in B16F10 1                         | -3.17 | 0.59 | 0.55 |
| A_52_P409746  | NM_080844 | Serpinc1  | 11905  | serine (or cysteine) peptidase inhibitor, clade C (antithroi | -4.48 | 0.59 | 0.05 |
| A_52_P437662  | NM_013884 | Cspg5     | 29873  | chondroitin sulfate proteoglycan 5                           | -3.04 | 0.59 | 0.68 |
| A_51_P243304  | NM_016905 | Galk1     | 14635  | galactokinase 1                                              | -4.49 | 0.59 | 0.05 |
| A_52_P523569  | NM_053014 | Agpat3    | 28169  | 1-acylglycerol-3-phosphate O-acyltransferase 3               | -3.40 | 0.59 | 0.36 |
| A_51_P310548  | NM_133676 | Osgep     | 66246  | O-sialoglycoprotein endopeptidase                            | -3.55 | 0.59 | 0.29 |
| A_51_P128973  | NM_013474 | Apoa2     | 11807  | apolipoprotein A-II                                          | -4.09 | 0.59 | 0.10 |
| A_51_P128491  | NM_015749 | Tcn2      | 21452  | transcobalamin 2                                             | -3.14 | 0.59 | 0.58 |
| A_52_P1124330 | AK082375  | NA        | NA     | NA                                                           | -3.12 | 0.59 | 0.59 |
| A_51_P179647  | NA        | NA        | NA     | NA                                                           | -3.06 | 0.59 | 0.66 |
| A_52_P34043   | NM_011151 | Ppm1b     | 19043  | protein phosphatase 1B, magnesium dependent, beta isc        | -4.14 | 0.59 | 0.11 |
| A_52_P325388  | AK080904  | Ttc39c    | 72747  | tetratricopeptide repeat domain 39C                          | -3.21 | 0.59 | 0.50 |
| A_52_P367745  | NM_007383 | Acads     | 11409  | acyl-Coenzyme A dehydrogenase, short chain                   | -4.19 | 0.59 | 0.11 |
| A_52_P547234  | NM_138599 | Tomm70a   | 28185  | translocase of outer mitochondrial membrane 70 homolc        | -3.14 | 0.59 | 0.58 |
| A_51_P327539  | NM_146950 | Olfr341   | 258952 | olfactory receptor 341                                       | -2.85 | 0.59 | 0.95 |
| A_51_P299309  | NM_024465 | Abhd12    | 76192  | abhydrolase domain containing 12                             | -3.70 | 0.59 | 0.22 |
| A_52_P305053  | NM_177163 | NA        | NA     | NA                                                           | -3.88 | 0.59 | 0.16 |
| A_51_P372147  | NM_025292 | Synj2bp   | 24071  | synaptojanin 2 binding protein                               | -3.18 | 0.59 | 0.53 |
| A_51_P312517  | NM_008058 | Fzd8      | 14370  | frizzled homolog 8 (Drosophila)                              | -4.95 | 0.59 | 0.09 |
| A_51_P407304  | AK169346  | Aldh16a1  | 69748  | aldehyde dehydrogenase 16 family, member A1                  | -3.05 | 0.59 | 0.66 |
| A_51_P153565  | NM_008360 | Il18      | 16173  | interleukin 18                                               | -4.24 | 0.58 | 0.08 |
| A_52_P226664  | AK040520  | Thsd4     | 207596 | thrombospondin, type I, domain containing 4                  | -4.60 | 0.58 | 0.06 |
| A_51_P516637  | NM_007555 | Bmp5      | 12160  | bone morphogenetic protein 5                                 | -3.26 | 0.58 | 0.45 |
| A_52_P795929  | AK081614  | NA        | NA     | NA                                                           | -3.28 | 0.58 | 0.44 |
| A_51_P187665  | NM_028904 | Rmi1      | 74386  | RMI1, RecQ mediated genome instability 1, homolog (S. c      | -2.86 | 0.58 | 0.92 |
| A_52_P256757  | NM_144816 | Rhbdl1    | 214951 | rhomboid, veinlet-like 1 (Drosophila)                        | -3.91 | 0.58 | 0.14 |

|               |            |           |        |                                                          |       |      |      |
|---------------|------------|-----------|--------|----------------------------------------------------------|-------|------|------|
| A_52_P796840  | NM_0010251 | BC026782  | 545366 | cDNA sequence BC026782                                   | -3.08 | 0.58 | 0.62 |
| A_52_P232071  | NA         | NA        | NA     | NA                                                       | -3.75 | 0.58 | 0.19 |
| A_52_P18972   | NM_146141  | Ppa2      | 74776  | pyrophosphatase (inorganic) 2                            | -4.19 | 0.58 | 0.11 |
| A_52_P102207  | BY718203   | NA        | NA     | NA                                                       | -7.20 | 0.58 | 0.00 |
| A_52_P539414  | NM_181410  | Gtf2h3    | 209357 | general transcription factor IIH, polypeptide 3          | -3.50 | 0.58 | 0.31 |
| A_52_P522372  | NM_175503  | Aard      | 239435 | alanine and arginine rich domain containing protein      | -3.52 | 0.58 | 0.28 |
| A_51_P322000  | XM_130308  | NA        | NA     | NA                                                       | -3.61 | 0.58 | 0.25 |
| A_52_P1069274 | NA         | NA        | NA     | NA                                                       | -3.22 | 0.58 | 0.49 |
| A_51_P474151  | NM_177746  | Awat2     | 245532 | acyl-CoA wax alcohol acyltransferase 2                   | -4.47 | 0.58 | 0.05 |
| A_52_P803668  | AK137981   | 2810021B0 | 66308  | RIKEN cDNA 2810021B07 gene                               | -4.04 | 0.58 | 0.13 |
| A_52_P2224    | AF213385   | Abcd1     | 11666  | ATP-binding cassette, sub-family D (ALD), member 1       | -2.91 | 0.58 | 0.85 |
| A_52_P195772  | AJ237846   | Rbmx      | 19655  | RNA binding motif protein, X chromosome                  | -3.16 | 0.58 | 0.55 |
| A_52_P38964   | AK131167   | Lrch4     | 231798 | leucine-rich repeats and calponin homology (CH) domain   | -3.77 | 0.58 | 0.19 |
| A_51_P332932  | AK016814   | 4933415A0 | 75727  | RIKEN cDNA 4933415A04 gene                               | -4.25 | 0.58 | 0.08 |
| A_51_P155482  | NM_011132  | Pole      | 18973  | polymerase (DNA directed), epsilon                       | -3.11 | 0.58 | 0.60 |
| A_51_P210603  | NM_130882  | Cyp4f13   | 170716 | cytochrome P450, family 4, subfamily f, polypeptide 13   | -4.86 | 0.58 | 0.07 |
| A_52_P764573  | NA         | NA        | NA     | NA                                                       | -2.90 | 0.58 | 0.87 |
| A_51_P300143  | NM_025650  | Uqcr11    | 66594  | ubiquinol-cytochrome c reductase, complex III subunit XI | -4.90 | 0.58 | 0.08 |
| A_52_P670745  | NM_025374  | Glo1      | 109801 | glyoxalase 1                                             | -4.01 | 0.58 | 0.12 |
| A_51_P334019  | NM_133684  | Mosc2     | 67247  | MOCO sulphurase C-terminal domain containing 2           | -3.51 | 0.58 | 0.29 |
| A_51_P363090  | NM_026641  | Ift80     | 68259  | intraflagellar transport 80 homolog (Chlamydomonas)      | -3.40 | 0.58 | 0.36 |
| A_52_P324986  | NM_009275  | Srprb     | 20818  | signal recognition particle receptor, B subunit          | -4.55 | 0.58 | 0.05 |
| A_52_P267824  | NM_197999  | 2210023G0 | 72361  | RIKEN cDNA 2210023G05 gene                               | -4.10 | 0.58 | 0.10 |
| A_51_P340947  | NM_027905  | 1300018J1 | 223776 | RIKEN cDNA 1300018J18 gene                               | -2.81 | 0.58 | 1.02 |
| A_52_P77793   | NM_015818  | Hs6st1    | 50785  | heparan sulfate 6-O-sulfotransferase 1                   | -3.55 | 0.58 | 0.27 |
| A_52_P1107346 | AK018397   | 2610002M0 | 67028  | RIKEN cDNA 2610002M06 gene                               | -5.42 | 0.58 | 0.00 |
| A_52_P290088  | AK021293   | Stbd1     | 52331  | starch binding domain 1                                  | -4.15 | 0.58 | 0.11 |
| A_52_P175028  | XM_991907  | NA        | NA     | NA                                                       | -3.23 | 0.58 | 0.49 |
| A_51_P379597  | NM_145518  | Ndufs1    | 227197 | NADH dehydrogenase (ubiquinone) Fe-S protein 1           | -4.52 | 0.58 | 0.05 |
| A_51_P439348  | NM_028262  | Setd3     | 52690  | SET domain containing 3                                  | -5.46 | 0.58 | 0.00 |
| A_52_P130972  | BC022180   | B4galnt1  | 14421  | beta-1,4-N-acetyl-galactosaminyl transferase 1           | -3.97 | 0.58 | 0.15 |
| A_52_P311566  | NM_016961  | Mapk9     | 26420  | mitogen-activated protein kinase 9                       | -2.81 | 0.58 | 1.02 |
| A_51_P298486  | NM_026225  | Cog6      | 67542  | component of oligomeric golgi complex 6                  | -3.14 | 0.58 | 0.58 |
| A_51_P408382  | NM_0010051 | Itgb4     | 192897 | integrin beta 4                                          | -3.01 | 0.58 | 0.70 |

|              |           |                 |        |                                                             |       |      |      |
|--------------|-----------|-----------------|--------|-------------------------------------------------------------|-------|------|------|
| A_52_P454950 | NM_009458 | Ube2b           | 22210  | ubiquitin-conjugating enzyme E2B, RAD6 homology (S. ce      | -4.13 | 0.58 | 0.10 |
| A_52_P35064  | NM_028454 | Tm7sf2          | 73166  | transmembrane 7 superfamily member 2                        | -3.73 | 0.58 | 0.21 |
| A_51_P329283 | AK078133  | Senp5           | 320213 | SUMO/sentrin specific peptidase 5                           | -3.16 | 0.58 | 0.55 |
| A_52_P253317 | XM_980129 | NA              | NA     | NA                                                          | -3.99 | 0.58 | 0.12 |
| A_51_P454196 | AK008803  | Sh2d4a          | 72281  | SH2 domain containing 4A                                    | -5.40 | 0.58 | 0.00 |
| A_52_P37980  | AK037216  | A030011A1319515 |        | RIKEN cDNA A030011A13 gene                                  | -3.48 | 0.58 | 0.32 |
| A_52_P68419  | NM_175164 | Arhgap26        | 71302  | Rho GTPase activating protein 26                            | -3.37 | 0.58 | 0.38 |
| A_51_P457492 | NM_025791 | Tmem223         | 66836  | transmembrane protein 223                                   | -3.48 | 0.58 | 0.32 |
| A_51_P101545 | NM_019447 | Hgfac           | 54426  | hepatocyte growth factor activator                          | -3.11 | 0.58 | 0.60 |
| A_52_P427240 | XM_128374 | NA              | NA     | NA                                                          | -3.10 | 0.58 | 0.60 |
| A_52_P637199 | NM_025844 | Chordc1         | 66917  | cysteine and histidine-rich domain (CHORD)-containing, z    | -4.50 | 0.58 | 0.05 |
| A_51_P408749 | AK169756  | 4933439C174476  |        | RIKEN cDNA 4933439C10 gene                                  | -3.01 | 0.58 | 0.70 |
| A_52_P242724 | AK122311  | Opa1            | 74143  | optic atrophy 1 homolog (human)                             | -4.11 | 0.58 | 0.10 |
| A_52_P77867  | NA        | NA              | NA     | NA                                                          | -4.25 | 0.58 | 0.08 |
| A_51_P444052 | NM_011327 | Scp2            | 20280  | sterol carrier protein 2, liver                             | -3.10 | 0.58 | 0.60 |
| A_51_P272227 | BC111913  | Tmem89          | 69384  | transmembrane protein 89                                    | -3.07 | 0.58 | 0.63 |
| A_51_P315931 | AF323958  | Slco2a1         | 24059  | solute carrier organic anion transporter family, member :   | -3.86 | 0.58 | 0.16 |
| A_52_P432052 | XM_979393 | 4930515G175098  |        | RIKEN cDNA 4930515G13 gene                                  | -3.07 | 0.58 | 0.63 |
| A_52_P281909 | AK015982  | 493053511675220 |        | RIKEN cDNA 4930535116 gene                                  | -4.37 | 0.57 | 0.09 |
| A_52_P555537 | AK035703  | 2810008D076972  |        | RIKEN cDNA 2810008D09 gene                                  | -3.06 | 0.57 | 0.65 |
| A_51_P254181 | NM_029629 | Fahd2a          | 68126  | fumarylacetoacetate hydrolase domain containing 2A          | -4.79 | 0.57 | 0.07 |
| A_51_P450812 | NM_133973 | Cog4            | 102339 | component of oligomeric golgi complex 4                     | -3.01 | 0.57 | 0.70 |
| A_51_P176854 | NM_027175 | Ndufaf1         | 69702  | NADH dehydrogenase (ubiquinone) 1 alpha subcomplex,         | -4.50 | 0.57 | 0.05 |
| A_51_P216219 | NM_007982 | Ptk2            | 14083  | PTK2 protein tyrosine kinase 2                              | -3.77 | 0.57 | 0.19 |
| A_52_P37890  | AK088541  | Ankrd28         | 105522 | ankyrin repeat domain 28                                    | -4.18 | 0.57 | 0.11 |
| A_52_P32081  | NM_175357 | Crbn            | 58799  | cereblon                                                    | -4.15 | 0.57 | 0.11 |
| A_51_P172177 | NM_001039 | Tmco1           | 68944  | transmembrane and coiled-coil domains 1                     | -3.96 | 0.57 | 0.14 |
| A_51_P299709 | AK017111  | 4933438K271270  |        | RIKEN cDNA 4933438K21 gene                                  | -3.39 | 0.57 | 0.36 |
| A_52_P207635 | NM_001033 | Zfc3h1          | 216345 | zinc finger, C3H1-type containing                           | -3.63 | 0.57 | 0.25 |
| A_52_P177341 | NM_197980 | Cox19           | 68033  | COX19 cytochrome c oxidase assembly homolog (S. cerev       | -3.40 | 0.57 | 0.35 |
| A_52_P636999 | XM_129951 | NA              | NA     | NA                                                          | -3.38 | 0.57 | 0.38 |
| A_51_P510437 | NM_011017 | Slc25a15        | 18408  | solute carrier family 25 (mitochondrial carrier ornithine t | -2.90 | 0.57 | 0.85 |
| A_52_P450    | NM_007711 | Clcn3           | 12725  | chloride channel 3                                          | -3.34 | 0.57 | 0.40 |
| A_52_P253299 | NM_001003 | BC030307        | 103220 | cDNA sequence BC030307                                      | -2.93 | 0.57 | 0.81 |

|              |           |           |        |                                                                 |       |      |      |
|--------------|-----------|-----------|--------|-----------------------------------------------------------------|-------|------|------|
| A_51_P306109 | AK019683  | NA        | NA     | NA                                                              | -3.99 | 0.57 | 0.12 |
| A_51_P254864 | CB723139  | NA        | NA     | NA                                                              | -3.11 | 0.57 | 0.60 |
| A_52_P542970 | XR_002670 | NA        | NA     | NA                                                              | -3.95 | 0.57 | 0.14 |
| A_52_P642039 | AK032413  | Trmt61b   | 68789  | tRNA methyltransferase 61 homolog B ( <i>S. cerevisiae</i> )    | -3.27 | 0.57 | 0.45 |
| A_51_P326346 | AK090384  | Ppa2      | 74776  | pyrophosphatase (inorganic) 2                                   | -4.35 | 0.57 | 0.09 |
| A_51_P351285 | NM_008794 | Pcsk7     | 18554  | proprotein convertase subtilisin/kexin type 7                   | -3.28 | 0.57 | 0.42 |
| A_52_P59264  | NM_026408 | Sncap     | 67847  | synuclein, alpha interacting protein (synphilin)                | -3.45 | 0.57 | 0.33 |
| A_52_P33453  | NA        | NA        | NA     | NA                                                              | -5.21 | 0.57 | 0.00 |
| A_51_P203321 | NM_145627 | Rbm10     | 236732 | RNA binding motif protein 10                                    | -3.38 | 0.57 | 0.36 |
| A_51_P300337 | NM_007792 | Csrp2     | 13008  | cysteine and glycine-rich protein 2                             | -2.95 | 0.57 | 0.76 |
| A_51_P413740 | NM_080845 | Ftcd      | 14317  | formiminotransferase cyclodeaminase                             | -2.89 | 0.57 | 0.87 |
| A_51_P269166 | NM_021412 | Mmp19     | 58223  | matrix metalloproteinase 19                                     | -3.85 | 0.57 | 0.16 |
| A_51_P360262 | NM_053122 | Immp2l    | 93757  | IMP2 inner mitochondrial membrane peptidase-like ( <i>S. ci</i> | -3.15 | 0.57 | 0.56 |
| A_52_P341708 | AK081879  | NA        | NA     | NA                                                              | -3.58 | 0.57 | 0.26 |
| A_52_P256421 | NA        | NA        | NA     | NA                                                              | -4.56 | 0.57 | 0.06 |
| A_51_P317131 | NM_146459 | Olfr1215  | 258451 | olfactory receptor 1215                                         | -3.52 | 0.57 | 0.29 |
| A_52_P3214   | BC053524  | lpo7      | 233726 | importin 7                                                      | -4.03 | 0.57 | 0.13 |
| A_52_P517063 | NM_053122 | Immp2l    | 93757  | IMP2 inner mitochondrial membrane peptidase-like ( <i>S. ci</i> | -3.14 | 0.57 | 0.58 |
| A_51_P296905 | XM_896000 | Ppat      | 231327 | phosphoribosyl pyrophosphate amidotransferase                   | -3.83 | 0.57 | 0.18 |
| A_52_P322535 | NM_025479 | 2810021B0 | 66308  | RIKEN cDNA 2810021B07 gene                                      | -3.06 | 0.57 | 0.65 |
| A_51_P448416 | AK151452  | Pusl1     | 433813 | pseudouridylate synthase-like 1                                 | -5.78 | 0.57 | 0.00 |
| A_52_P485433 | NM_026246 | Mrpl49    | 18120  | mitochondrial ribosomal protein L49                             | -2.84 | 0.57 | 0.96 |
| A_51_P452682 | AK076753  | Pou5f2    | 75507  | POU domain class 5, transcription factor 2                      | -3.37 | 0.57 | 0.38 |
| A_52_P120968 | NM_173010 | Ube3a     | 22215  | ubiquitin protein ligase E3A                                    | -4.08 | 0.57 | 0.10 |
| A_51_P189269 | NM_175341 | Mbnl2     | 105559 | muscleblind-like 2                                              | -2.94 | 0.57 | 0.78 |
| A_52_P465386 | NA        | NA        | NA     | NA                                                              | -3.07 | 0.57 | 0.65 |
| A_51_P256798 | NA        | NA        | NA     | NA                                                              | -3.43 | 0.57 | 0.34 |
| A_51_P441970 | NM_175162 | Stox2     | 71069  | storkhead box 2                                                 | -3.86 | 0.57 | 0.16 |
| A_52_P338199 | NM_026378 | Dalrd3    | 67789  | DALR anticodon binding domain containing 3                      | -3.34 | 0.57 | 0.40 |
| A_51_P153973 | NM_198322 | Zfp273    | 212569 | zinc finger protein 273                                         | -2.88 | 0.57 | 0.89 |
| A_52_P636724 | AK078193  | Lamp2     | 16784  | lysosomal-associated membrane protein 2                         | -3.68 | 0.57 | 0.22 |
| A_52_P208613 | NM_175027 | Fancc     | 237211 | Fanconi anemia, complementation group B                         | -2.94 | 0.57 | 0.79 |
| A_51_P195324 | NM_019870 | Naa10     | 56292  | N(alpha)-acetyltransferase 10, NatA catalytic subunit           | -3.33 | 0.57 | 0.40 |
| A_51_P483280 | NM_011170 | Prnp      | 19122  | prion protein                                                   | -3.33 | 0.57 | 0.40 |

|               |           |           |        |                                                              |       |      |      |
|---------------|-----------|-----------|--------|--------------------------------------------------------------|-------|------|------|
| A_51_P464981  | NM_025735 | Map1lc3a  | 66734  | microtubule-associated protein 1 light chain 3 alpha         | -4.18 | 0.57 | 0.11 |
| A_51_P274173  | Z19521    | Ldlr      | 16835  | low density lipoprotein receptor                             | -3.08 | 0.57 | 0.62 |
| A_51_P484526  | NM_011915 | Wif1      | 24117  | Wnt inhibitory factor 1                                      | -3.57 | 0.56 | 0.27 |
| A_51_P169128  | NM_025879 | 2410002O2 | 66975  | RIKEN cDNA 2410002O22 gene                                   | -4.72 | 0.56 | 0.06 |
| A_51_P261428  | D86344    | Pdcd4     | 18569  | programmed cell death 4                                      | -4.58 | 0.56 | 0.06 |
| A_52_P451775  | NM_026580 | Otub2     | 68149  | OTU domain, ubiquitin aldehyde binding 2                     | -3.32 | 0.56 | 0.40 |
| A_51_P116932  | NM_133664 | Lad1      | 16763  | ladinin                                                      | -2.84 | 0.56 | 0.96 |
| A_52_P29392   | NM_013866 | Zfp385a   | 29813  | zinc finger protein 385A                                     | -3.40 | 0.56 | 0.35 |
| A_52_P485850  | XM_976153 | NA        | NA     | NA                                                           | -3.05 | 0.56 | 0.66 |
| A_51_P158418  | AK013449  | 2810488G0 | 72842  | RIKEN cDNA 2810488G03 gene                                   | -3.46 | 0.56 | 0.33 |
| A_52_P1156465 | AK083162  | Mbd2      | 17191  | methyl-CpG binding domain protein 2                          | -3.19 | 0.56 | 0.52 |
| A_52_P184594  | NM_001012 | Slc2a9    | 117591 | solute carrier family 2 (facilitated glucose transporter), m | -3.37 | 0.56 | 0.38 |
| A_51_P413687  | BI905520  | Cox19     | 68033  | COX19 cytochrome c oxidase assembly homolog (S. cerev        | -4.08 | 0.56 | 0.10 |
| A_51_P510997  | NM_007511 | Atp7b     | 11979  | ATPase, Cu <sup>++</sup> transporting, beta polypeptide      | -3.28 | 0.56 | 0.42 |
| A_51_P275658  | NM_016874 | Deaf1     | 54006  | deformed epidermal autoregulatory factor 1 (Drosophila)      | -3.86 | 0.56 | 0.16 |
| A_52_P132165  | NM_053262 | Hsd17b11  | 114664 | hydroxysteroid (17-beta) dehydrogenase 11                    | -4.55 | 0.56 | 0.05 |
| A_52_P18775   | NM_175471 | Cyb5rl    | 230582 | cytochrome b5 reductase-like                                 | -3.45 | 0.56 | 0.33 |
| A_51_P490198  | NM_026398 | Pop5      | 117109 | processing of precursor 5, ribonuclease P/MRP family (S.     | -3.00 | 0.56 | 0.70 |
| A_52_P586062  | NA        | NA        | NA     | NA                                                           | -3.37 | 0.56 | 0.37 |
| A_51_P446003  | NM_013764 | Dguok     | 27369  | deoxyguanosine kinase                                        | -5.03 | 0.56 | 0.00 |
| A_51_P207310  | U85089    | Txn2      | 56551  | thioredoxin 2                                                | -3.90 | 0.56 | 0.16 |
| A_52_P208213  | NA        | NA        | NA     | NA                                                           | -3.95 | 0.56 | 0.14 |
| A_52_P860257  | AK085706  | BB042571  | 105057 | expressed sequence BB042571                                  | -3.30 | 0.56 | 0.42 |
| A_52_P557265  | NM_018887 | Cyp39a1   | 56050  | cytochrome P450, family 39, subfamily a, polypeptide 1       | -2.91 | 0.56 | 0.85 |
| A_52_P507305  | NM_026347 | lah1      | 67732  | isoamyl acetate-hydrolyzing esterase 1 homolog (S. cerev     | -4.17 | 0.56 | 0.11 |
| A_52_P287219  | BC055006  | Man2a2    | 140481 | mannosidase 2, alpha 2                                       | -4.43 | 0.56 | 0.09 |
| A_52_P232470  | NM_001009 | Smcr7     | 237781 | Smith-Magenis syndrome chromosome region, candidate          | -3.14 | 0.56 | 0.58 |
| A_52_P853177  | NM_011923 | Angptl2   | 26360  | angiopoietin-like 2                                          | -3.08 | 0.56 | 0.62 |
| A_52_P170509  | NM_011075 | Abcb1b    | 18669  | ATP-binding cassette, sub-family B (MDR/TAP), member :       | -3.02 | 0.56 | 0.70 |
| A_51_P407879  | NM_145382 | Fam193b   | 212483 | family with sequence similarity 193, member B                | -3.95 | 0.56 | 0.14 |
| A_51_P295034  | NM_010915 | Klk1b4    | 18048  | kallikrein 1-related pepidase b4                             | -3.10 | 0.56 | 0.60 |
| A_51_P501473  | AK083741  | G3bp1     | 27041  | Ras-GTPase-activating protein SH3-domain binding prote       | -4.26 | 0.56 | 0.08 |
| A_52_P229316  | NM_015737 | Galnt4    | 14426  | UDP-N-acetyl-alpha-D-galactosamine:polypeptide N-acet        | -3.37 | 0.56 | 0.37 |
| A_52_P237102  | AK085462  | Dpy19l3   | 233115 | dpy-19-like 3 (C. elegans)                                   | -2.92 | 0.56 | 0.82 |

|              |           |           |         |                                                           |       |      |      |
|--------------|-----------|-----------|---------|-----------------------------------------------------------|-------|------|------|
| A_51_P482233 | BC072655  | Slc39a9   | 328133  | solute carrier family 39 (zinc transporter), member 9     | -4.80 | 0.56 | 0.07 |
| A_51_P105263 | NM_201355 | Nat14     | 269854  | N-acetyltransferase 14                                    | -2.92 | 0.56 | 0.82 |
| A_51_P114287 | AK077833  | Cpsf6     | 432508  | cleavage and polyadenylation specific factor 6            | -4.33 | 0.56 | 0.09 |
| A_51_P509140 | NM_170760 | U2af114   | 233073  | U2 small nuclear RNA auxiliary factor 1-like 4            | -3.18 | 0.56 | 0.53 |
| A_52_P180565 | BC100355  | 231006110 | 69662   | RIKEN cDNA 2310061104 gene                                | -2.89 | 0.56 | 0.89 |
| A_52_P435042 | NM_145143 | Mpp4      | 227157  | membrane protein, palmitoylated 4 (MAGUK p55 subfam       | -6.67 | 0.56 | 0.00 |
| A_52_P403398 | AK090147  | lhh       | 16147   | Indian hedgehog                                           | -4.15 | 0.56 | 0.11 |
| A_51_P227392 | NM_133955 | Rhou      | 69581   | ras homolog gene family, member U                         | -3.61 | 0.56 | 0.25 |
| A_52_P224323 | NM_001013 | Pard3     | 93742   | par-3 (partitioning defective 3) homolog (C. elegans)     | -3.41 | 0.56 | 0.34 |
| A_51_P376138 | NM_054094 | Acsm1     | 117147  | acyl-CoA synthetase medium-chain family member 1          | -3.28 | 0.56 | 0.42 |
| A_52_P563340 | NA        | NA        | NA      | NA                                                        | -3.01 | 0.56 | 0.70 |
| A_51_P427151 | NM_138671 | Nadk      | 192185  | NAD kinase                                                | -4.70 | 0.56 | 0.06 |
| A_52_P490863 | NM_025403 | Nop10     | 66181   | NOP10 ribonucleoprotein homolog (yeast)                   | -4.54 | 0.56 | 0.05 |
| A_51_P504658 | NM_207142 | Olf1036   | 258245  | olfactory receptor 1036                                   | -3.85 | 0.56 | 0.16 |
| A_51_P480982 | NM_025374 | Glo1      | 109801  | glyoxalase 1                                              | -2.81 | 0.56 | 1.02 |
| A_52_P89273  | AK051905  | Cbx8      | 30951   | chromobox homolog 8 (Drosophila Pc class)                 | -3.43 | 0.56 | 0.34 |
| A_52_P456561 | NM_007435 | Abcd1     | 11666   | ATP-binding cassette, sub-family D (ALD), member 1        | -2.83 | 0.56 | 0.98 |
| A_51_P386031 | NM_009119 | Sap18     | 20220   | Sin3-associated polypeptide 18                            | -3.96 | 0.56 | 0.15 |
| A_52_P116204 | NM_001025 | Cadm1     | 54725   | cell adhesion molecule 1                                  | -4.56 | 0.56 | 0.06 |
| A_52_P67463  | AK140938  | 1810026B0 | 69170   | RIKEN cDNA 1810026B05 gene                                | -3.62 | 0.56 | 0.25 |
| A_51_P429472 | NM_024185 | Fam188a   | 66960   | family with sequence similarity 188, member A             | -3.78 | 0.56 | 0.17 |
| A_51_P134551 | NM_026452 | Coq9      | 67914   | coenzyme Q9 homolog (yeast)                               | -3.12 | 0.56 | 0.59 |
| A_51_P392861 | NM_029365 | Med25     | 75613   | mediator of RNA polymerase II transcription, subunit 25 l | -3.02 | 0.56 | 0.70 |
| A_51_P350048 | NM_010361 | Gstt2     | 14872   | glutathione S-transferase, theta 2                        | -3.08 | 0.56 | 0.62 |
| A_52_P333902 | NM_001033 | Slc4a7    | 218756  | solute carrier family 4, sodium bicarbonate cotransporter | -3.17 | 0.56 | 0.53 |
| A_52_P66580  | BC011139  | Gck       | 103988  | glucokinase                                               | -4.43 | 0.55 | 0.09 |
| A_52_P663027 | AK137889  | Stat5b    | 20851   | signal transducer and activator of transcription 5B       | -7.00 | 0.55 | 0.00 |
| A_52_P380997 | NA        | NA        | NA      | NA                                                        | -4.16 | 0.55 | 0.11 |
| A_52_P627256 | AK087889  | E330037G1 | 1102220 | RIKEN cDNA E330037G11 gene                                | -3.65 | 0.55 | 0.24 |
| A_52_P391623 | NM_028777 | Sec14l1   | 74136   | SEC14-like 1 (S. cerevisiae)                              | -3.11 | 0.55 | 0.60 |
| A_51_P211458 | AK147382  | 2700078E1 | 78832   | RIKEN cDNA 2700078E11 gene                                | -4.26 | 0.55 | 0.08 |
| A_52_P172283 | NM_130892 | Rtn4ip1   | 170728  | reticulon 4 interacting protein 1                         | -2.86 | 0.55 | 0.92 |
| A_52_P290434 | AK051849  | Fbxl7     | 448987  | F-box and leucine-rich repeat protein 7                   | -4.02 | 0.55 | 0.12 |
| A_52_P363352 | NM_172310 | Tarsl2    | 272396  | threonyl-tRNA synthetase-like 2                           | -4.12 | 0.55 | 0.10 |



|               |           |          |        |                                                                 |       |      |      |
|---------------|-----------|----------|--------|-----------------------------------------------------------------|-------|------|------|
| A_51_P295967  | NM_001042 | Proc     | 19123  | protein C                                                       | -6.15 | 0.55 | 0.00 |
| A_51_P476559  | NM_027221 | Krtcap3  | 69815  | keratinocyte associated protein 3                               | -3.12 | 0.55 | 0.59 |
| A_52_P421133  | NM_007533 | Bckdha   | 12039  | branched chain ketoacid dehydrogenase E1, alpha polypeptide     | -5.29 | 0.55 | 0.00 |
| A_52_P669451  | AK135586  | NA       | NA     | NA                                                              | -3.42 | 0.55 | 0.34 |
| A_52_P1189140 | AK140790  | NA       | NA     | NA                                                              | -6.03 | 0.55 | 0.00 |
| A_52_P154347  | NM_007899 | Ecm1     | 13601  | extracellular matrix protein 1                                  | -3.60 | 0.55 | 0.26 |
| A_51_P147562  | NM_025343 | Rmnd1    | 66084  | required for meiotic nuclear division 1 homolog (S. cerevisiae) | -2.96 | 0.55 | 0.75 |
| A_52_P419879  | NA        | NA       | NA     | NA                                                              | -3.11 | 0.55 | 0.60 |
| A_52_P375970  | BC075677  | Fam38b   | 667742 | family with sequence similarity 38, member B                    | -3.54 | 0.55 | 0.29 |
| A_51_P413005  | NM_023543 | Chn2     | 69993  | chimerin (chimaerin) 2                                          | -3.20 | 0.55 | 0.52 |
| A_51_P339540  | NM_009876 | Cdkn1c   | 12577  | cyclin-dependent kinase inhibitor 1C (P57)                      | -3.46 | 0.55 | 0.33 |
| A_51_P108659  | NM_011134 | Pon1     | 18979  | paraoxonase 1                                                   | -4.95 | 0.55 | 0.09 |
| A_52_P79385   | NM_025952 | Magt1    | 67075  | magnesium transporter 1                                         | -3.66 | 0.55 | 0.24 |
| A_51_P493117  | NM_025807 | Slc16a9  | 66859  | solute carrier family 16 (monocarboxylic acid transporter)      | -4.12 | 0.55 | 0.10 |
| A_51_P373441  | NM_026948 | Cuta     | 67675  | cutA divalent cation tolerance homolog (E. coli)                | -3.36 | 0.55 | 0.37 |
| A_52_P13568   | NM_026341 | Nudt13   | 67725  | nudix (nucleoside diphosphate linked moiety X)-type motif 13    | -3.11 | 0.55 | 0.60 |
| A_51_P209225  | NM_133932 | Tada3    | 101206 | transcriptional adaptor 3                                       | -3.53 | 0.55 | 0.28 |
| A_52_P273477  | XM_980330 | Scn2a1   | 110876 | sodium channel, voltage-gated, type II, alpha 1                 | -3.15 | 0.55 | 0.56 |
| A_51_P432449  | NM_009748 | Bet1     | 12068  | blocked early in transport 1 homolog (S. cerevisiae)            | -3.03 | 0.55 | 0.68 |
| A_52_P597464  | NA        | NA       | NA     | NA                                                              | -3.23 | 0.55 | 0.48 |
| A_51_P491095  | NM_028986 | Gzf1     | 74533  | GNDF-inducible zinc finger protein 1                            | -2.89 | 0.55 | 0.87 |
| A_52_P595687  | NM_018819 | Brp44l   | 55951  | brain protein 44-like                                           | -5.15 | 0.55 | 0.00 |
| A_52_P52156   | XM_973921 | Isoc2a   | 664994 | isochorismatase domain containing 2a                            | -3.87 | 0.55 | 0.16 |
| A_51_P517075  | NM_011340 | Serpinf1 | 20317  | serine (or cysteine) peptidase inhibitor, clade F, member 1     | -5.28 | 0.55 | 0.00 |
| A_52_P102223  | NM_018814 | Pcnx     | 54604  | pecanex homolog (Drosophila)                                    | -2.98 | 0.55 | 0.74 |
| A_51_P332602  | NM_013677 | Surf1    | 20930  | surfeit gene 1                                                  | -3.72 | 0.55 | 0.21 |
| A_52_P487040  | BC056642  | Rdh9     | 103142 | retinol dehydrogenase 9                                         | -3.16 | 0.55 | 0.55 |
| A_52_P108397  | NM_146170 | C87436   | 232196 | expressed sequence C87436                                       | -3.69 | 0.55 | 0.22 |
| A_51_P426994  | NM_153591 | Nars2    | 244141 | asparaginyl-tRNA synthetase 2 (mitochondrial)(putative)         | -4.53 | 0.55 | 0.05 |
| A_51_P249302  | NM_011994 | Abcd2    | 26874  | ATP-binding cassette, sub-family D (ALD), member 2              | -3.73 | 0.55 | 0.21 |
| A_52_P539540  | NM_028262 | Setd3    | 52690  | SET domain containing 3                                         | -5.32 | 0.55 | 0.00 |
| A_51_P198694  | NM_144909 | Gckr     | 231103 | glucokinase regulatory protein                                  | -3.96 | 0.55 | 0.15 |
| A_52_P764924  | AV036172  | NA       | NA     | NA                                                              | -2.90 | 0.55 | 0.87 |
| A_52_P669425  | NA        | NA       | NA     | NA                                                              | -2.96 | 0.55 | 0.76 |

|              |           |            |        |                                                           |       |      |      |
|--------------|-----------|------------|--------|-----------------------------------------------------------|-------|------|------|
| A_51_P466633 | NM_011391 | Slc16a7    | 20503  | solute carrier family 16 (monocarboxylic acid transporter | -3.29 | 0.55 | 0.43 |
| A_51_P103929 | NM_008591 | Met        | 17295  | met proto-oncogene                                        | -3.56 | 0.55 | 0.28 |
| A_51_P443920 | NA        | NA         | NA     | NA                                                        | -3.63 | 0.55 | 0.25 |
| A_52_P68674  | BC100378  | Hjulp      | 381280 | Holliday junction recognition protein                     | -3.23 | 0.55 | 0.48 |
| A_51_P155313 | NM_010362 | Gsto1      | 14873  | glutathione S-transferase omega 1                         | -4.12 | 0.55 | 0.10 |
| A_51_P379618 | NM_011834 | Aadat      | 23923  | aminoadipate aminotransferase                             | -2.83 | 0.55 | 0.98 |
| A_52_P836389 | DV062564  | NA         | NA     | NA                                                        | -3.14 | 0.55 | 0.58 |
| A_51_P430082 | NM_009437 | Tst        | 22117  | thiosulfate sulfurtransferase, mitochondrial              | -2.99 | 0.55 | 0.71 |
| A_52_P429106 | NM_027278 | 2810432D09 | 69961  | RIKEN cDNA 2810432D09 gene                                | -4.12 | 0.55 | 0.10 |
| A_52_P370878 | NM_175489 | Osbpl8     | 237542 | oxysterol binding protein-like 8                          | -3.77 | 0.55 | 0.19 |
| A_51_P192523 | NM_022657 | Fgf23      | 64654  | fibroblast growth factor 23                               | -3.65 | 0.55 | 0.24 |
| A_51_P204845 | AK014492  | Cugbp1     | 13046  | CUG triplet repeat, RNA binding protein 1                 | -3.03 | 0.55 | 0.68 |
| A_52_P528463 | NM_027122 | Mfsd3      | 69572  | major facilitator superfamily domain containing 3         | -2.88 | 0.55 | 0.91 |
| A_52_P316824 | AK009255  | Ttll5      | 320244 | tubulin tyrosine ligase-like family, member 5             | -3.19 | 0.55 | 0.53 |
| A_51_P465988 | AK076333  | Ganc       | 76051  | glucosidase, alpha; neutral C                             | -5.16 | 0.55 | 0.00 |
| A_51_P481721 | NM_016771 | Sult1d1    | 53315  | sulfotransferase family 1D, member 1                      | -4.03 | 0.55 | 0.13 |
| A_52_P656565 | NM_145488 | Pex6       | 224824 | peroxisomal biogenesis factor 6                           | -3.65 | 0.54 | 0.24 |
| A_52_P271200 | NM_029296 | 1700001C19 | 75462  | RIKEN cDNA 1700001C19 gene                                | -2.99 | 0.54 | 0.71 |
| A_51_P300655 | BC082558  | Tbccd1     | 70573  | TBCC domain containing 1                                  | -4.53 | 0.54 | 0.05 |
| A_51_P345593 | NM_009269 | Sptlc1     | 268656 | serine palmitoyltransferase, long chain base subunit 1    | -6.94 | 0.54 | 0.00 |
| A_52_P601996 | AK018254  | Fbxl17     | 50758  | F-box and leucine-rich repeat protein 17                  | -3.42 | 0.54 | 0.34 |
| A_52_P582767 | NM_024436 | Rab22a     | 19334  | RAB22A, member RAS oncogene family                        | -3.08 | 0.54 | 0.62 |
| A_51_P174081 | NM_146073 | Zdhhc14    | 224454 | zinc finger, DHHC domain containing 14                    | -3.29 | 0.54 | 0.43 |
| A_51_P123895 | NM_053078 | D0H4S114   | 27528  | DNA segment, human D4S114                                 | -3.82 | 0.54 | 0.18 |
| A_52_P175679 | NM_001007 | Gm13023    | 194227 | predicted gene 13023                                      | -4.56 | 0.54 | 0.06 |
| A_51_P188108 | NM_008480 | Lama1      | 16772  | laminin, alpha 1                                          | -3.38 | 0.54 | 0.36 |
| A_52_P124429 | NM_016665 | Stra13     | 20892  | stimulated by retinoic acid 13                            | -3.16 | 0.54 | 0.55 |
| A_52_P281033 | NM_019654 | Socs5      | 56468  | suppressor of cytokine signaling 5                        | -4.22 | 0.54 | 0.10 |
| A_51_P273928 | AK039851  | Kdm2a      | 225876 | lysine (K)-specific demethylase 2A                        | -3.97 | 0.54 | 0.15 |
| A_52_P326548 | NM_175276 | Fhod3      | 225288 | formin homology 2 domain containing 3                     | -3.05 | 0.54 | 0.66 |
| A_51_P477941 | NM_013907 | Fbxw4      | 30838  | F-box and WD-40 domain protein 4                          | -3.42 | 0.54 | 0.34 |
| A_52_P641477 | NM_027462 | Wars2      | 70560  | tryptophanyl tRNA synthetase 2 (mitochondrial)            | -4.05 | 0.54 | 0.13 |
| A_52_P261846 | NM_009929 | Col18a1    | 12822  | collagen, type XVIII, alpha 1                             | -3.11 | 0.54 | 0.60 |
| A_52_P264905 | NM_026908 | Cab39l     | 69008  | calcium binding protein 39-like                           | -4.15 | 0.54 | 0.11 |

|              |           |         |        |                                                          |       |      |      |
|--------------|-----------|---------|--------|----------------------------------------------------------|-------|------|------|
| A_51_P212801 | NM_019668 | Ube2a   | 22209  | ubiquitin-conjugating enzyme E2A, RAD6 homolog (S. cer   | -3.78 | 0.54 | 0.19 |
| A_52_P459732 | NM_020002 | Rec8    | 56739  | REC8 homolog (yeast)                                     | -6.80 | 0.54 | 0.00 |
| A_52_P532559 | AK158826  | Thrb    | 21834  | thyroid hormone receptor beta                            | -3.04 | 0.54 | 0.67 |
| A_51_P330918 | NA        | NA      | NA     | NA                                                       | -3.16 | 0.54 | 0.55 |
| A_51_P144581 | NM_016783 | Pgrmc1  | 53328  | progesterone receptor membrane component 1               | -3.42 | 0.54 | 0.34 |
| A_51_P298480 | NM_026180 | Abcg8   | 67470  | ATP-binding cassette, sub-family G (WHITE), member 8     | -3.37 | 0.54 | 0.37 |
| A_51_P236464 | NM_025633 | Metapl1 | 66559  | methionine aminopeptidase-like 1                         | -4.29 | 0.54 | 0.08 |
| A_52_P680735 | NM_012019 | Aifm1   | 26926  | apoptosis-inducing factor, mitochondrion-associated 1    | -4.50 | 0.54 | 0.05 |
| A_51_P425962 | NM_010158 | Khdrbs3 | 13992  | KH domain containing, RNA binding, signal transduction a | -2.91 | 0.54 | 0.85 |
| A_51_P179919 | NM_172759 | Ces5    | 234673 | carboxylesterase 5                                       | -3.19 | 0.54 | 0.52 |
| A_52_P504361 | NM_013792 | Naglu   | 27419  | alpha-N-acetylglucosaminidase (Sanfilippo disease IIIB)  | -2.86 | 0.54 | 0.93 |
| A_52_P328621 | NA        | NA      | NA     | NA                                                       | -4.82 | 0.54 | 0.07 |
| A_51_P497821 | NM_146185 | Zfp790  | 233056 | zinc finger protein 790                                  | -3.68 | 0.54 | 0.22 |
| A_51_P448466 | NM_010767 | Masp2   | 17175  | mannan-binding lectin serine peptidase 2                 | -3.25 | 0.54 | 0.46 |
| A_52_P553841 | NM_016774 | Atp5b   | 11947  | ATP synthase, H+ transporting mitochondrial F1 complex   | -4.40 | 0.54 | 0.09 |
| A_52_P520439 | NM_018858 | Pebp1   | 23980  | phosphatidylethanolamine binding protein 1               | -4.10 | 0.54 | 0.10 |
| A_52_P203741 | NM_009176 | St3gal3 | 20441  | ST3 beta-galactoside alpha-2,3-sialyltransferase 3       | -4.52 | 0.54 | 0.05 |
| A_52_P652999 | NM_178362 | Sorbs1  | 20411  | sorbin and SH3 domain containing 1                       | -2.88 | 0.54 | 0.89 |
| A_51_P330922 | NM_146101 | Habp2   | 226243 | hyaluronic acid binding protein 2                        | -3.00 | 0.54 | 0.71 |
| A_52_P581435 | NM_008810 | Pdha1   | 18597  | pyruvate dehydrogenase E1 alpha 1                        | -3.00 | 0.54 | 0.70 |
| A_51_P411264 | NM_172597 | Txndc16 | 70561  | thioredoxin domain containing 16                         | -3.17 | 0.54 | 0.53 |
| A_51_P137604 | NM_007995 | Fcna    | 14133  | ficolin A                                                | -3.52 | 0.54 | 0.29 |
| A_51_P248122 | NM_133234 | Bbc3    | 170770 | BCL2 binding component 3                                 | -3.37 | 0.54 | 0.37 |
| A_51_P401828 | NM_008646 | Cpamd8  | 17837  | C3 and PZP-like, alpha-2-macroglobulin domain containin  | -5.21 | 0.54 | 0.00 |
| A_52_P597427 | AK154023  | Pank2   | 74450  | pantothenate kinase 2 (Hallervorden-Spatz syndrome)      | -3.70 | 0.54 | 0.22 |
| A_51_P461578 | NM_007997 | Fdxr    | 14149  | ferredoxin reductase                                     | -2.92 | 0.54 | 0.82 |
| A_52_P8227   | NM_008866 | Lypla1  | 18777  | lysophospholipase 1                                      | -3.39 | 0.54 | 0.36 |
| A_52_P225207 | NM_007523 | Bak1    | 12018  | BCL2-antagonist/killer 1                                 | -3.04 | 0.54 | 0.67 |
| A_51_P214087 | NM_007678 | Cebpa   | 12606  | CCAAT/enhancer binding protein (C/EBP), alpha            | -2.87 | 0.54 | 0.91 |
| A_51_P478303 | NM_010006 | Cyp2d9  | 13105  | cytochrome P450, family 2, subfamily d, polypeptide 9    | -2.84 | 0.54 | 0.96 |
| A_51_P220162 | NM_008716 | Notch3  | 18131  | Notch gene homolog 3 (Drosophila)                        | -3.74 | 0.54 | 0.21 |
| A_52_P383378 | NM_001004 | Whamm   | 434204 | WAS protein homolog associated with actin, golgi membi   | -5.64 | 0.54 | 0.00 |
| A_52_P621064 | NA        | NA      | NA     | NA                                                       | -3.36 | 0.54 | 0.39 |
| A_51_P511800 | NM_025909 | Oma1    | 67013  | OMA1 homolog, zinc metallopeptidase (S. cerevisiae)      | -3.32 | 0.54 | 0.40 |

|              |           |                 |        |                                                              |       |      |      |
|--------------|-----------|-----------------|--------|--------------------------------------------------------------|-------|------|------|
| A_51_P394973 | NM_026598 | Ebpl            | 68177  | emopamil binding protein-like                                | -3.05 | 0.54 | 0.66 |
| A_51_P204504 | NM_013925 | Adat1           | 30947  | adenosine deaminase, tRNA-specific 1                         | -2.81 | 0.54 | 1.02 |
| A_51_P174542 | NM_153398 | Zbtb24          | 268294 | zinc finger and BTB domain containing 24                     | -3.01 | 0.54 | 0.70 |
| A_51_P399873 | NM_001033 | Acmsd           | 266645 | amino carboxymuconate semialdehyde decarboxylase             | -3.25 | 0.54 | 0.46 |
| A_52_P407918 | NM_133975 | Trip12          | 14897  | thyroid hormone receptor interactor 12                       | -3.48 | 0.54 | 0.31 |
| A_52_P537852 | NM_024203 | Fam120b         | 67544  | family with sequence similarity 120, member B                | -3.78 | 0.54 | 0.17 |
| A_51_P246677 | NM_020002 | Rec8            | 56739  | REC8 homolog (yeast)                                         | -4.30 | 0.54 | 0.08 |
| A_52_P884092 | AK082796  | C330020G1109343 |        | RIKEN cDNA C330020G15 gene                                   | -2.83 | 0.54 | 0.98 |
| A_52_P305539 | NM_201375 | Kng2            | 385643 | kininogen 2                                                  | -3.45 | 0.54 | 0.33 |
| A_51_P101283 | NA        | NA              | NA     | NA                                                           | -3.13 | 0.54 | 0.59 |
| A_51_P187645 | BC004786  | Igh-VJ558       | 16061  | immunoglobulin heavy chain (J558 family)                     | -5.08 | 0.54 | 0.00 |
| A_51_P411200 | NM_027391 | Iyd             | 70337  | iodotyrosine deiodinase                                      | -3.18 | 0.54 | 0.53 |
| A_51_P233101 | NM_008520 | Ltbp3           | 16998  | latent transforming growth factor beta binding protein 3     | -3.25 | 0.54 | 0.46 |
| A_51_P251717 | NM_026304 | I7Rn6           | 67669  | lethal, Chr 7, Rinchik 6                                     | -3.41 | 0.54 | 0.34 |
| A_52_P250803 | AK164977  | Arl5b           | 75869  | ADP-ribosylation factor-like 5B                              | -3.44 | 0.53 | 0.35 |
| A_51_P407311 | NM_145954 | Aldh16a1        | 69748  | aldehyde dehydrogenase 16 family, member A1                  | -4.58 | 0.53 | 0.06 |
| A_51_P112677 | NM_178603 | Mrpl50          | 28028  | mitochondrial ribosomal protein L50                          | -4.48 | 0.53 | 0.05 |
| A_51_P250445 | NM_020497 | Zfp276          | 57247  | zinc finger protein (C2H2 type) 276                          | -2.84 | 0.53 | 0.96 |
| A_51_P337020 | NM_025483 | Senp7           | 66315  | SUMO1/sentrin specific peptidase 7                           | -4.11 | 0.53 | 0.10 |
| A_51_P286865 | BC064745  | Wdr33           | 74320  | WD repeat domain 33                                          | -3.16 | 0.53 | 0.55 |
| A_51_P192751 | NM_026732 | Mrpl14          | 68463  | mitochondrial ribosomal protein L14                          | -3.31 | 0.53 | 0.40 |
| A_52_P582105 | NM_007996 | Fdx1            | 14148  | ferredoxin 1                                                 | -5.25 | 0.53 | 0.00 |
| A_51_P270741 | NM_009303 | Syngr1          | 20972  | synaptogyrin 1                                               | -2.97 | 0.53 | 0.75 |
| A_52_P388898 | NM_028476 | 2610110G173242  |        | RIKEN cDNA 2610110G12 gene                                   | -3.53 | 0.53 | 0.29 |
| A_51_P204295 | NM_011220 | Pts             | 19286  | 6-pyruvoyl-tetrahydropterin synthase                         | -2.95 | 0.53 | 0.78 |
| A_51_P326091 | BC023121  | Cflar           | 12633  | CASP8 and FADD-like apoptosis regulator                      | -2.98 | 0.53 | 0.74 |
| A_52_P523330 | NM_027215 | Tmem147         | 69804  | transmembrane protein 147                                    | -2.97 | 0.53 | 0.74 |
| A_51_P166152 | NM_029269 | Spp2            | 75396  | secreted phosphoprotein 2                                    | -4.14 | 0.53 | 0.11 |
| A_52_P368945 | AK134567  | Skap2           | 54353  | src family associated phosphoprotein 2                       | -3.62 | 0.53 | 0.25 |
| A_51_P454152 | AK048416  | Ercc6           | 319955 | excision repair cross-complementing rodent repair deficiency | -3.06 | 0.53 | 0.65 |
| A_51_P162955 | NM_177920 | Serpina7        | 331535 | serine (or cysteine) peptidase inhibitor, clade A (alpha-1 ; | -3.29 | 0.53 | 0.42 |
| A_52_P150525 | NA        | NA              | NA     | NA                                                           | -4.92 | 0.53 | 0.08 |
| A_52_P306396 | NM_008914 | Ppp3cb          | 19056  | protein phosphatase 3, catalytic subunit, beta isoform       | -6.19 | 0.53 | 0.00 |
| A_51_P181705 | AK017277  | Ptprg           | 19270  | protein tyrosine phosphatase, receptor type, G               | -4.43 | 0.53 | 0.09 |

|               |           |           |         |                                                       |       |      |      |
|---------------|-----------|-----------|---------|-------------------------------------------------------|-------|------|------|
| A_51_P369628  | NM_133949 | Ptov1     | 84113   | prostate tumor over expressed gene 1                  | -3.18 | 0.53 | 0.53 |
| A_51_P113182  | NM_013584 | Lifr      | 16880   | leukemia inhibitory factor receptor                   | -4.56 | 0.53 | 0.06 |
| A_51_P279064  | NM_198167 | Tmem63b   | 224807  | transmembrane protein 63b                             | -4.45 | 0.53 | 0.10 |
| A_51_P163233  | NM_028814 | 2810403AC | 74200   | RIKEN cDNA 2810403A07 gene                            | -5.91 | 0.53 | 0.00 |
| A_52_P27725   | BC060616  | D930016D  | 100662  | RIKEN cDNA D930016D06 gene                            | -3.93 | 0.53 | 0.14 |
| A_51_P460844  | NM_144923 | Blvrb     | 233016  | biliverdin reductase B (flavin reductase (NADPH))     | -3.27 | 0.53 | 0.45 |
| A_51_P168439  | AK004187  | Klhl24    | 75785   | kelch-like 24 (Drosophila)                            | -3.86 | 0.53 | 0.16 |
| A_51_P468770  | NM_024273 | 4930455C2 | 76916   | RIKEN cDNA 4930455C21 gene                            | -3.87 | 0.53 | 0.16 |
| A_51_P118103  | NM_024203 | Fam120b   | 67544   | family with sequence similarity 120, member B         | -3.35 | 0.53 | 0.38 |
| A_52_P517289  | NM_001042 | Akap1     | 11640   | A kinase (PRKA) anchor protein 1                      | -2.86 | 0.53 | 0.93 |
| A_52_P464003  | NM_026402 | Atg3      | 67841   | autophagy-related 3 (yeast)                           | -4.82 | 0.53 | 0.07 |
| A_51_P115049  | NM_007962 | Mpzl2     | 14012   | myelin protein zero-like 2                            | -4.02 | 0.53 | 0.13 |
| A_52_P1022311 | BC039142  | NA        | NA      | NA                                                    | -3.29 | 0.53 | 0.42 |
| A_52_P83252   | NM_008281 | Hpn       | 15451   | hepsin                                                | -3.57 | 0.53 | 0.27 |
| A_51_P299149  | NM_145451 | Gpx6      | 75512   | glutathione peroxidase 6                              | -3.48 | 0.53 | 0.32 |
| A_51_P114456  | AK018110  | 2210012G  | 66526   | RIKEN cDNA 2210012G02 gene                            | -3.32 | 0.53 | 0.40 |
| A_51_P363791  | NM_018829 | Ap3m1     | 55946   | adaptor-related protein complex 3, mu 1 subunit       | -3.02 | 0.53 | 0.70 |
| A_52_P500622  | NM_026622 | 3110057O  | 1269423 | RIKEN cDNA 3110057O12 gene                            | -2.88 | 0.53 | 0.89 |
| A_52_P1180575 | AK084110  | D130095D  | 402775  | RIKEN cDNA D130095D21 gene                            | -2.88 | 0.53 | 0.89 |
| A_52_P309718  | XM_897688 | D14Abb1e  | 218850  | DNA segment, Chr 14, Abbott 1 expressed               | -2.92 | 0.53 | 0.82 |
| A_51_P446315  | NM_025950 | Cdc37l1   | 67072   | cell division cycle 37 homolog (S. cerevisiae)-like 1 | -4.30 | 0.53 | 0.08 |
| A_52_P1036404 | AK045702  | 1810013D  | 166278  | RIKEN cDNA 1810013D10 gene                            | -3.32 | 0.53 | 0.40 |
| A_51_P124133  | NM_010006 | Cyp2d9    | 13105   | cytochrome P450, family 2, subfamily d, polypeptide 9 | -3.56 | 0.53 | 0.28 |
| A_52_P257502  | NM_010517 | Igfbp4    | 16010   | insulin-like growth factor binding protein 4          | -3.14 | 0.53 | 0.58 |
| A_51_P219721  | NM_025942 | Ola1      | 67059   | Obg-like ATPase 1                                     | -2.99 | 0.53 | 0.72 |
| A_51_P232901  | NM_009923 | Cnp       | 12799   | 2',3'-cyclic nucleotide 3' phosphodiesterase          | -2.93 | 0.53 | 0.81 |
| A_51_P394354  | NM_027464 | 5730469M  | 70564   | RIKEN cDNA 5730469M10 gene                            | -3.56 | 0.53 | 0.28 |
| A_51_P394172  | NM_007954 | Es1       | 13884   | esterase 1                                            | -3.60 | 0.53 | 0.26 |
| A_52_P78730   | NM_023483 | 1110032A  | 68721   | RIKEN cDNA 1110032A03 gene                            | -3.13 | 0.53 | 0.59 |
| A_51_P247928  | AB059646  | Clmn      | 94040   | calmin                                                | -3.55 | 0.53 | 0.29 |
| A_52_P226137  | AK087234  | Ulk2      | 29869   | Unc-51 like kinase 2 (C. elegans)                     | -4.87 | 0.53 | 0.07 |
| A_52_P1140098 | AK038241  | Gm10914   | 1E+08   | predicted gene 10914                                  | -6.47 | 0.53 | 0.00 |
| A_51_P467668  | NM_019987 | Ick       | 56542   | intestinal cell kinase                                | -3.09 | 0.53 | 0.62 |
| A_52_P574710  | BC064447  | Whsc1l1   | 234135  | Wolf-Hirschhorn syndrome candidate 1-like 1 (human)   | -3.12 | 0.52 | 0.59 |

|              |           |           |        |                                                                     |       |      |      |
|--------------|-----------|-----------|--------|---------------------------------------------------------------------|-------|------|------|
| A_51_P111554 | NM_011506 | Sucla2    | 20916  | succinate-Coenzyme A ligase, ADP-forming, beta subunit              | -3.26 | 0.52 | 0.46 |
| A_51_P252199 | NM_146234 | Mmgt1     | 236792 | membrane magnesium transporter 1                                    | -3.93 | 0.52 | 0.14 |
| A_51_P132592 | NM_029998 | 6030458C1 | 77877  | RIKEN cDNA 6030458C11 gene                                          | -5.10 | 0.52 | 0.00 |
| A_51_P514700 | NM_025565 | Spc25     | 66442  | SPC25, NDC80 kinetochore complex component, homolo                  | -3.10 | 0.52 | 0.60 |
| A_51_P361286 | NM_026792 | Agpat5    | 52123  | 1-acylglycerol-3-phosphate O-acyltransferase 5 (lysophos            | -2.94 | 0.52 | 0.79 |
| A_51_P381527 | NM_011958 | Orc4l     | 26428  | origin recognition complex, subunit 4-like ( <i>S. cerevisiae</i> ) | -3.32 | 0.52 | 0.40 |
| A_52_P672296 | AK147452  | Snx27     | 76742  | sorting nexin family member 27                                      | -3.23 | 0.52 | 0.49 |
| A_51_P444301 | NM_018819 | Brp44l    | 55951  | brain protein 44-like                                               | -6.74 | 0.52 | 0.00 |
| A_52_P493925 | BB385819  | NA        | NA     | NA                                                                  | -3.59 | 0.52 | 0.26 |
| A_51_P459873 | AK018157  | 6330411E0 | 70733  | RIKEN cDNA 6330411E07 gene                                          | -5.36 | 0.52 | 0.00 |
| A_52_P15490  | NM_021496 | Pvrl3     | 58998  | poliovirus receptor-related 3                                       | -3.60 | 0.52 | 0.26 |
| A_52_P68477  | NM_172763 | Zfp809    | 235047 | zinc finger protein 809                                             | -2.89 | 0.52 | 0.89 |
| A_51_P229875 | AK147402  | E330009J0 | 243780 | RIKEN cDNA E330009J07 gene                                          | -3.00 | 0.52 | 0.71 |
| A_52_P603836 | NM_026184 | Ero1lb    | 67475  | ERO1-like beta ( <i>S. cerevisiae</i> )                             | -3.22 | 0.52 | 0.49 |
| A_51_P101573 | NM_029091 | Klc4      | 74764  | kinesin light chain 4                                               | -3.56 | 0.52 | 0.28 |
| A_51_P140211 | NM_030087 | Ndufv3    | 78330  | NADH dehydrogenase (ubiquinone) flavoprotein 3                      | -3.71 | 0.52 | 0.20 |
| A_52_P125354 | NM_019488 | Slc2a8    | 56017  | solute carrier family 2, (facilitated glucose transporter), n       | -3.41 | 0.52 | 0.35 |
| A_52_P496810 | NM_011734 | Siae      | 22619  | sialic acid acetyltransferase                                       | -3.63 | 0.52 | 0.25 |
| A_52_P177021 | NM_011220 | Pts       | 19286  | 6-pyruvoyl-tetrahydropterin synthase                                | -3.14 | 0.52 | 0.58 |
| A_52_P358720 | NM_146489 | Olfir266  | 258482 | olfactory receptor 266                                              | -7.39 | 0.52 | 0.00 |
| A_51_P500051 | NM_019923 | Itpr2     | 16439  | inositol 1,4,5-triphosphate receptor 2                              | -3.06 | 0.52 | 0.65 |
| A_51_P196990 | NM_017404 | Mrpl39    | 27393  | mitochondrial ribosomal protein L39                                 | -6.24 | 0.52 | 0.00 |
| A_52_P153291 | NM_145700 | Ccrl1     | 252837 | chemokine (C-C motif) receptor-like 1                               | -4.52 | 0.52 | 0.05 |
| A_52_P492069 | NA        | NA        | NA     | NA                                                                  | -4.43 | 0.52 | 0.09 |
| A_51_P204831 | M13018    | Crip1     | 12925  | cysteine-rich protein 1 (intestinal)                                | -2.97 | 0.52 | 0.74 |
| A_51_P103975 | NM_027430 | Brp44     | 70456  | brain protein 44                                                    | -4.36 | 0.52 | 0.09 |
| A_51_P449450 | NM_001024 | Dcun1d2   | 102323 | DCN1, defective in cullin neddylation 1, domain containir           | -3.17 | 0.52 | 0.53 |
| A_52_P376574 | XM_355911 | Pcsk6     | 18553  | proprotein convertase subtilisin/kexin type 6                       | -3.35 | 0.52 | 0.38 |
| A_51_P497006 | NM_053188 | Srd5a2    | 94224  | steroid 5 alpha-reductase 2                                         | -3.56 | 0.52 | 0.28 |
| A_52_P660945 | NM_019861 | Ctsf      | 56464  | cathepsin F                                                         | -5.02 | 0.52 | 0.00 |
| A_52_P650325 | AK090231  | Slc35e1   | 270066 | solute carrier family 35, member E1                                 | -4.77 | 0.52 | 0.07 |
| A_51_P446856 | AK050046  | Flnb      | 286940 | filamin, beta                                                       | -3.17 | 0.52 | 0.53 |
| A_51_P257832 | NM_009479 | Uros      | 22276  | uroporphyrinogen III synthase                                       | -3.60 | 0.52 | 0.26 |
| A_51_P259968 | NM_023113 | Aspa      | 11484  | aspartoacylase                                                      | -3.81 | 0.52 | 0.17 |

|              |           |           |        |                                                          |       |      |      |
|--------------|-----------|-----------|--------|----------------------------------------------------------|-------|------|------|
| A_51_P307644 | NM_025652 | Gtf3a     | 66596  | general transcription factor III A                       | -2.87 | 0.52 | 0.91 |
| A_52_P64383  | NM_023184 | Klf15     | 66277  | Kruppel-like factor 15                                   | -4.11 | 0.52 | 0.10 |
| A_51_P239286 | NM_029410 | Bcl2l12   | 75736  | BCL2-like 12 (proline rich)                              | -3.18 | 0.52 | 0.53 |
| A_52_P611000 | NM_016903 | Esd       | 13885  | esterase D/formylglutathione hydrolase                   | -3.00 | 0.52 | 0.71 |
| A_51_P428977 | AK051235  | Onecut1   | 15379  | one cut domain, family member 1                          | -3.53 | 0.52 | 0.28 |
| A_51_P159565 | NM_001033 | Arhgef9   | 236915 | CDC42 guanine nucleotide exchange factor (GEF) 9         | -4.64 | 0.52 | 0.06 |
| A_52_P142761 | AK035750  | Pdcd6ip   | 18571  | programmed cell death 6 interacting protein              | -3.32 | 0.52 | 0.40 |
| A_52_P493867 | NM_027194 | Tm2d2     | 69742  | TM2 domain containing 2                                  | -3.49 | 0.52 | 0.31 |
| A_51_P274163 | NM_029556 | Clybl     | 69634  | citrate lyase beta like                                  | -4.11 | 0.52 | 0.10 |
| A_51_P512629 | AK009255  | Ttll5     | 320244 | tubulin tyrosine ligase-like family, member 5            | -3.10 | 0.52 | 0.60 |
| A_51_P207718 | AK164548  | Zfp826    | 414758 | zinc finger protein 826                                  | -2.97 | 0.52 | 0.74 |
| A_51_P447855 | BC027795  | Rnf160    | 78913  | ring finger protein 160                                  | -3.01 | 0.52 | 0.70 |
| A_51_P164296 | NM_021475 | Adamdec1  | 58860  | ADAM-like, decysin 1                                     | -2.86 | 0.52 | 0.93 |
| A_52_P494207 | AK046210  | Itpr2     | 16439  | inositol 1,4,5-triphosphate receptor 2                   | -3.23 | 0.52 | 0.48 |
| A_52_P414645 | NM_001002 | Gpr126    | 215798 | G protein-coupled receptor 126                           | -2.94 | 0.52 | 0.78 |
| A_52_P104782 | NM_025784 | Bcs1l     | 66821  | BCS1-like (yeast)                                        | -3.23 | 0.52 | 0.48 |
| A_51_P190869 | BB307119  | NA        | NA     | NA                                                       | -3.23 | 0.52 | 0.48 |
| A_52_P574306 | NM_023114 | Apoc3     | 11814  | apolipoprotein C-III                                     | -2.90 | 0.52 | 0.87 |
| A_51_P521304 | NM_026167 | Klhl13    | 67455  | kelch-like 13 (Drosophila)                               | -4.72 | 0.52 | 0.06 |
| A_51_P337065 | AK160524  | 4930402E1 | 319518 | RIKEN cDNA 4930402E16 gene                               | -3.33 | 0.52 | 0.40 |
| A_52_P353322 | NM_133973 | Cog4      | 102339 | component of oligomeric golgi complex 4                  | -3.25 | 0.52 | 0.47 |
| A_51_P461319 | NM_025961 | Gatm      | 67092  | glycine amidinotransferase (L-arginine:glycine amidinotr | -2.87 | 0.52 | 0.91 |
| A_52_P494686 | NM_177645 | 1110028C1 | 68691  | RIKEN cDNA 1110028C15 gene                               | -7.91 | 0.52 | 0.00 |
| A_51_P417861 | NM_146231 | Zfp825    | 235956 | zinc finger protein 825                                  | -5.41 | 0.52 | 0.00 |
| A_51_P116651 | NM_019759 | Dpt       | 56429  | dermatopontin                                            | -2.89 | 0.52 | 0.87 |
| A_52_P6092   | NM_207269 | NA        | NA     | NA                                                       | -3.66 | 0.52 | 0.24 |
| A_51_P269793 | AK033780  | NA        | NA     | NA                                                       | -2.93 | 0.52 | 0.81 |
| A_51_P477833 | NM_001033 | Klhl21    | 242785 | kelch-like 21 (Drosophila)                               | -4.24 | 0.52 | 0.08 |
| A_52_P625111 | XM_923330 | NA        | NA     | NA                                                       | -3.40 | 0.52 | 0.35 |
| A_52_P277322 | AK084607  | 2310008HC | 66356  | RIKEN cDNA 2310008H09 gene                               | -3.37 | 0.52 | 0.38 |
| A_52_P437502 | NM_025476 | Fam82b    | 66302  | family with sequence similarity 82, member B             | -4.22 | 0.51 | 0.10 |
| A_51_P484054 | NM_010172 | F7        | 14068  | coagulation factor VII                                   | -3.70 | 0.51 | 0.22 |
| A_51_P217395 | NM_145474 | Cyp2d34   | 223706 | cytochrome P450, family 2, subfamily d, polypeptide 34   | -3.82 | 0.51 | 0.18 |
| A_52_P438682 | BC064745  | Wdr33     | 74320  | WD repeat domain 33                                      | -3.27 | 0.51 | 0.44 |

|               |           |                 |        |                                                           |       |      |      |
|---------------|-----------|-----------------|--------|-----------------------------------------------------------|-------|------|------|
| A_51_P461444  | L26316    | Dhfr            | 13361  | dihydrofolate reductase                                   | -3.00 | 0.51 | 0.71 |
| A_51_P407323  | NM_007976 | F5              | 14067  | coagulation factor V                                      | -3.18 | 0.51 | 0.53 |
| A_51_P440923  | AK009333  | 2310014D169633  |        | RIKEN cDNA 2310014D11 gene                                | -4.30 | 0.51 | 0.08 |
| A_51_P275123  | BC003498  | Psd3            | 234353 | pleckstrin and Sec7 domain containing 3                   | -2.81 | 0.51 | 1.02 |
| A_51_P289742  | NM_009512 | Slc27a5         | 26459  | solute carrier family 27 (fatty acid transporter), member | -4.30 | 0.51 | 0.08 |
| A_52_P92121   | AK053456  | Ankrd33b        | 67434  | ankyrin repeat domain 33B                                 | -3.52 | 0.51 | 0.28 |
| A_51_P512783  | NM_025476 | Fam82b          | 66302  | family with sequence similarity 82, member B              | -4.77 | 0.51 | 0.07 |
| A_52_P121675  | NM_009884 | Cebpg           | 12611  | CCAAT/enhancer binding protein (C/EBP), gamma             | -4.85 | 0.51 | 0.07 |
| A_52_P290090  | AK021293  | Stbd1           | 52331  | starch binding domain 1                                   | -4.84 | 0.51 | 0.07 |
| A_52_P364021  | NM_026713 | Mogat1          | 68393  | monoacylglycerol O-acyltransferase 1                      | -6.09 | 0.51 | 0.00 |
| A_52_P304028  | NM_053158 | Mrpl1           | 94061  | mitochondrial ribosomal protein L1                        | -4.44 | 0.51 | 0.10 |
| A_52_P165824  | NM_175443 | Etnk2           | 214253 | ethanolamine kinase 2                                     | -3.72 | 0.51 | 0.21 |
| A_51_P392134  | NM_080560 | Ube2n           | 93765  | ubiquitin-conjugating enzyme E2N                          | -4.43 | 0.51 | 0.09 |
| A_51_P214837  | NM_001039 | Arhgap12        | 75415  | Rho GTPase activating protein 12                          | -3.87 | 0.51 | 0.16 |
| A_51_P393761  | NM_153064 | Ndufs2          | 226646 | NADH dehydrogenase (ubiquinone) Fe-S protein 2            | -4.62 | 0.51 | 0.06 |
| A_51_P179023  | NM_026893 | Dcaf12          | 68970  | DDB1 and CUL4 associated factor 12                        | -3.40 | 0.51 | 0.35 |
| A_52_P266320  | XM_111900 | NA              | NA     | NA                                                        | -3.56 | 0.51 | 0.28 |
| A_52_P409868  | AK050087  | C730014E0319990 |        | RIKEN cDNA C730014E05 gene                                | -3.85 | 0.51 | 0.16 |
| A_51_P305453  | NA        | NA              | NA     | NA                                                        | -3.68 | 0.51 | 0.22 |
| A_52_P948981  | AK173109  | Zfp473          | 243963 | zinc finger protein 473                                   | -3.07 | 0.51 | 0.63 |
| A_51_P444264  | NM_153457 | Rtn1            | 104001 | reticulon 1                                               | -4.11 | 0.51 | 0.10 |
| A_51_P475244  | NM_133984 | Hemk1           | 69536  | HemK methyltransferase family member 1                    | -3.13 | 0.51 | 0.58 |
| A_52_P1036395 | AK051769  | NA              | NA     | NA                                                        | -3.71 | 0.51 | 0.20 |
| A_52_P341161  | BC056977  | H13             | 14950  | histocompatibility 13                                     | -3.75 | 0.51 | 0.21 |
| A_52_P508317  | NM_025745 | Erlec1          | 66753  | endoplasmic reticulum lectin 1                            | -2.96 | 0.51 | 0.75 |
| A_51_P180905  | XM_355911 | Pcsk6           | 18553  | proprotein convertase subtilisin/kexin type 6             | -3.26 | 0.51 | 0.46 |
| A_51_P231979  | NM_013472 | Anxa6           | 11749  | annexin A6                                                | -3.20 | 0.51 | 0.52 |
| A_51_P236738  | NR_002839 | Dlx6as          | 13397  | distal-less homeobox 6, antisense                         | -3.06 | 0.51 | 0.65 |
| A_52_P298986  | NM_001039 | Lin7a           | 108030 | lin-7 homolog A (C. elegans)                              | -4.13 | 0.51 | 0.11 |
| A_51_P214557  | NM_010959 | Oit3            | 18302  | oncoprotein induced transcript 3                          | -2.86 | 0.51 | 0.92 |
| A_52_P560728  | NM_023475 | Serhl           | 68607  | serine hydrolase-like                                     | -4.08 | 0.51 | 0.10 |
| A_52_P223407  | AK135623  | Mrpl35          | 66223  | mitochondrial ribosomal protein L35                       | -3.43 | 0.51 | 0.34 |
| A_51_P273684  | NM_028803 | Gbe1            | 74185  | glucan (1,4-alpha-), branching enzyme 1                   | -3.75 | 0.51 | 0.21 |
| A_52_P462239  | AK084087  | D130020G:320972 |        | RIKEN cDNA D130020G16 gene                                | -4.31 | 0.51 | 0.08 |



|              |           |                 |        |                                                          |       |      |      |
|--------------|-----------|-----------------|--------|----------------------------------------------------------|-------|------|------|
| A_51_P215794 | NM_013851 | Abca8b          | 27404  | ATP-binding cassette, sub-family A (ABC1), member 8b     | -3.33 | 0.51 | 0.40 |
| A_52_P605129 | NM_178239 | NA              | NA     | NA                                                       | -3.91 | 0.51 | 0.14 |
| A_52_P380825 | NM_144550 | Ccdc52          | 212514 | coiled-coil domain containing 52                         | -3.31 | 0.51 | 0.40 |
| A_51_P265905 | BC066035  | Zranb3          | 226409 | zinc finger, RAN-binding domain containing 3             | -3.67 | 0.51 | 0.23 |
| A_52_P637172 | AK154222  | Pyroxd2         | 74580  | pyridine nucleotide-disulphide oxidoreductase domain 2   | -4.19 | 0.51 | 0.11 |
| A_52_P88818  | NM_029556 | Clybl           | 69634  | citrate lyase beta like                                  | -4.30 | 0.51 | 0.08 |
| A_52_P118706 | NM_176994 | 9630013D2319743 |        | RIKEN cDNA 9630013D21 gene                               | -3.47 | 0.51 | 0.32 |
| A_51_P107547 | NM_147085 | Olf571          | 259089 | olfactory receptor 571                                   | -3.30 | 0.51 | 0.42 |
| A_51_P416613 | AK082166  | 1810058I2467705 |        | RIKEN cDNA 1810058I24 gene                               | -3.80 | 0.51 | 0.17 |
| A_52_P75668  | BB653684  | NA              | NA     | NA                                                       | -3.03 | 0.51 | 0.68 |
| A_51_P108853 | NM_146106 | Lyplal1         | 226791 | lysophospholipase-like 1                                 | -3.64 | 0.51 | 0.23 |
| A_51_P512820 | NM_172733 | Dera            | 232449 | 2-deoxyribose-5-phosphate aldolase homolog (C. elegans)  | -3.29 | 0.51 | 0.43 |
| A_52_P318955 | NM_018829 | Ap3m1           | 55946  | adaptor-related protein complex 3, mu 1 subunit          | -2.87 | 0.51 | 0.91 |
| A_51_P229911 | NM_080435 | Adcy4           | 104110 | adenylate cyclase 4                                      | -3.15 | 0.51 | 0.56 |
| A_51_P322801 | NM_031877 | Wasf1           | 83767  | WASP family 1                                            | -3.42 | 0.51 | 0.34 |
| A_51_P197509 | NM_153594 | Pcmdt2          | 245867 | protein-L-isoaspartate (D-aspartate) O-methyltransferase | -2.96 | 0.51 | 0.75 |
| A_51_P347206 | NM_147088 | Olf569          | 259092 | olfactory receptor 569                                   | -3.75 | 0.51 | 0.21 |
| A_52_P527463 | NM_145959 | D15Ert62:210998 |        | DNA segment, Chr 15, ERATO Doi 621, expressed            | -3.56 | 0.51 | 0.27 |
| A_51_P130110 | NM_130884 | ldh3b           | 170718 | isocitrate dehydrogenase 3 (NAD+) beta                   | -3.69 | 0.51 | 0.22 |
| A_52_P459609 | AK083543  | Iqgap2          | 544963 | IQ motif containing GTPase activating protein 2          | -4.54 | 0.51 | 0.05 |
| A_51_P400944 | NM_144861 | Rprd1a          | 225283 | regulation of nuclear pre-mRNA domain containing 1A      | -5.26 | 0.51 | 0.00 |
| A_52_P10458  | NM_011543 | Skp1a           | 21402  | S-phase kinase-associated protein 1A                     | -4.56 | 0.51 | 0.06 |
| A_52_P482830 | NM_025580 | Pnkd            | 56695  | paroxysmal nonkinesigenic dyskinesia                     | -3.45 | 0.51 | 0.33 |
| A_52_P290021 | AK002639  | Memo1           | 76890  | mediator of cell motility 1                              | -4.03 | 0.51 | 0.13 |
| A_51_P266763 | NM_007998 | Fech            | 14151  | ferrochelatase                                           | -3.72 | 0.51 | 0.20 |
| A_52_P626329 | NA        | NA              | NA     | NA                                                       | -4.39 | 0.51 | 0.09 |
| A_51_P177762 | NM_153133 | Rdh9            | 103142 | retinol dehydrogenase 9                                  | -4.26 | 0.51 | 0.08 |
| A_51_P342835 | NM_027909 | C2cd2l          | 71764  | C2 calcium-dependent domain containing 2-like            | -2.92 | 0.51 | 0.82 |
| A_51_P434426 | NM_203507 | Rwdd4a          | 192174 | RWD domain containing 4A                                 | -4.26 | 0.51 | 0.08 |
| A_51_P308469 | NM_011884 | Rngtt           | 24018  | RNA guanylyltransferase and 5'-phosphatase               | -3.85 | 0.50 | 0.16 |
| A_51_P481788 | NM_011949 | Mapk1           | 26413  | mitogen-activated protein kinase 1                       | -5.48 | 0.50 | 0.00 |
| A_52_P745    | NM_030721 | Acox3           | 80911  | acyl-Coenzyme A oxidase 3, pristanoyl                    | -3.97 | 0.50 | 0.15 |
| A_51_P379680 | NM_011972 | Poli            | 26447  | polymerase (DNA directed), iota                          | -4.15 | 0.50 | 0.11 |
| A_52_P122393 | NM_001033 | Zfc3h1          | 216345 | zinc finger, C3H1-type containing                        | -2.84 | 0.50 | 0.96 |

|              |           |            |        |                                                                      |       |      |      |
|--------------|-----------|------------|--------|----------------------------------------------------------------------|-------|------|------|
| A_51_P477627 | NM_146170 | C87436     | 232196 | expressed sequence C87436                                            | -5.13 | 0.50 | 0.00 |
| A_51_P417858 | NM_146231 | Zfp825     | 235956 | zinc finger protein 825                                              | -4.01 | 0.50 | 0.12 |
| A_51_P104718 | NM_001010 | Gpr12      | 14738  | G-protein coupled receptor 12                                        | -3.54 | 0.50 | 0.29 |
| A_51_P242166 | NM_024434 | Lap3       | 66988  | leucine aminopeptidase 3                                             | -4.50 | 0.50 | 0.05 |
| A_52_P383754 | AF217545  | Copg2as2   | 1E+08  | coatomer protein complex, subunit gamma 2, antisense                 | -3.15 | 0.50 | 0.56 |
| A_51_P477179 | NM_022433 | Sirt3      | 64384  | sirtuin 3 (silent mating type information regulation 2, homologue 3) | -2.86 | 0.50 | 0.93 |
| A_52_P537459 | NM_027016 | Sec62      | 69276  | SEC62 homolog (S. cerevisiae)                                        | -4.28 | 0.50 | 0.08 |
| A_52_P548227 | NM_024177 | Mrpl38     | 60441  | mitochondrial ribosomal protein L38                                  | -4.66 | 0.50 | 0.06 |
| A_51_P402225 | XM_203596 | NA         | NA     | NA                                                                   | -2.96 | 0.50 | 0.75 |
| A_51_P295085 | NM_008760 | Ogn        | 18295  | osteoglycin                                                          | -3.62 | 0.50 | 0.25 |
| A_51_P162671 | NM_008035 | Folr2      | 14276  | folate receptor 2 (fetal)                                            | -2.95 | 0.50 | 0.78 |
| A_52_P400224 | NM_016892 | Ccs        | 12460  | copper chaperone for superoxide dismutase                            | -3.74 | 0.50 | 0.21 |
| A_52_P509188 | AK129437  | Fto        | 26383  | fat mass and obesity associated                                      | -3.46 | 0.50 | 0.33 |
| A_52_P682099 | BC058650  | Fam149b    | 105428 | family with sequence similarity 149, member B                        | -3.76 | 0.50 | 0.19 |
| A_51_P172251 | NM_025903 | Ifrd2      | 15983  | interferon-related developmental regulator 2                         | -3.36 | 0.50 | 0.37 |
| A_51_P204286 | AK033552  | 2900064A1  | 73024  | RIKEN cDNA 2900064A13 gene                                           | -4.87 | 0.50 | 0.07 |
| A_51_P319141 | NM_023377 | Stard5     | 170460 | StAR-related lipid transfer (START) domain containing 5              | -4.31 | 0.50 | 0.08 |
| A_52_P671700 | AK080793  | 9330129D05 | 338350 | RIKEN cDNA 9330129D05 gene                                           | -4.58 | 0.50 | 0.06 |
| A_51_P418469 | NM_023595 | Dut        | 110074 | deoxyuridine triphosphatase                                          | -3.03 | 0.50 | 0.68 |
| A_52_P633163 | NM_008650 | Mut        | 17850  | methylmalonyl-Coenzyme A mutase                                      | -4.12 | 0.50 | 0.10 |
| A_52_P576041 | NM_016846 | Rgl1       | 19731  | ribosomal guanine nucleotide dissociation stimulator,-like 1         | -3.15 | 0.50 | 0.56 |
| A_52_P100002 | AK135247  | Rps24      | 20088  | ribosomal protein S24                                                | -5.29 | 0.50 | 0.00 |
| A_52_P325819 | AK137406  | Yy1        | 22632  | YY1 transcription factor                                             | -4.22 | 0.50 | 0.10 |
| A_51_P314375 | NM_080844 | Serpinc1   | 11905  | serine (or cysteine) peptidase inhibitor, clade C (antithrombin)     | -3.00 | 0.50 | 0.71 |
| A_52_P431662 | NM_024434 | Lap3       | 66988  | leucine aminopeptidase 3                                             | -3.45 | 0.50 | 0.33 |
| A_52_P55726  | NM_011883 | Rnf13      | 24017  | ring finger protein 13                                               | -3.20 | 0.50 | 0.52 |
| A_52_P251183 | NM_175106 | Tmem177    | 66343  | transmembrane protein 177                                            | -3.23 | 0.50 | 0.48 |
| A_51_P260098 | U18992    | Gcdh       | 270076 | glutaryl-Coenzyme A dehydrogenase                                    | -6.14 | 0.50 | 0.00 |
| A_52_P202045 | AK078273  | Lrp1       | 16971  | low density lipoprotein receptor-related protein 1                   | -3.09 | 0.50 | 0.62 |
| A_52_P681557 | XM_149291 | NA         | NA     | NA                                                                   | -3.03 | 0.50 | 0.68 |
| A_52_P162486 | NM_007542 | Bgn        | 12111  | biglycan                                                             | -3.02 | 0.50 | 0.70 |
| A_51_P452280 | NM_010839 | Mtcp1      | 17763  | mature T-cell proliferation 1                                        | -3.54 | 0.50 | 0.29 |
| A_52_P400831 | NM_001001 | Adamts13   | 279028 | adisin integrin-like and metalloproteinase (reprolysin type) 13      | -5.03 | 0.50 | 0.00 |
| A_52_P471947 | NA        | NA         | NA     | NA                                                                   | -3.07 | 0.50 | 0.65 |

|               |           |                 |        |                                                         |       |      |      |
|---------------|-----------|-----------------|--------|---------------------------------------------------------|-------|------|------|
| A_52_P819555  | AK048651  | NA              | NA     | NA                                                      | -3.98 | 0.50 | 0.12 |
| A_52_P631613  | NA        | NA              | NA     | NA                                                      | -3.85 | 0.50 | 0.16 |
| A_52_P387009  | NM_028133 | Egln3           | 112407 | EGL nine homolog 3 (C. elegans)                         | -2.95 | 0.50 | 0.78 |
| A_51_P374457  | NM_013541 | Gstp1           | 14870  | glutathione S-transferase, pi 1                         | -4.48 | 0.50 | 0.05 |
| A_51_P356265  | NM_016845 | Acrbp           | 54137  | proacrosin binding protein                              | -3.28 | 0.50 | 0.44 |
| A_51_P435858  | NA        | NA              | NA     | NA                                                      | -3.58 | 0.50 | 0.26 |
| A_52_P318447  | NM_153193 | Hsd3b2          | 15493  | hydroxy-delta-5-steroid dehydrogenase, 3 beta- and ster | -2.82 | 0.50 | 0.99 |
| A_51_P423308  | NM_008342 | Igfbp2          | 16008  | insulin-like growth factor binding protein 2            | -3.64 | 0.50 | 0.24 |
| A_51_P224872  | BC076568  | Syne2           | 319565 | synaptic nuclear envelope 2                             | -4.18 | 0.50 | 0.11 |
| A_51_P273679  | NM_028772 | Dmgdh           | 74129  | dimethylglycine dehydrogenase precursor                 | -4.78 | 0.50 | 0.07 |
| A_51_P386270  | NM_201360 | Cyp2d12         | 380997 | cytochrome P450, family 2, subfamily d, polypeptide 12  | -3.04 | 0.50 | 0.67 |
| A_52_P494841  | NA        | NA              | NA     | NA                                                      | -2.98 | 0.50 | 0.72 |
| A_51_P336910  | NM_026719 | Lmbrd1          | 68421  | LMBR1 domain containing 1                               | -3.84 | 0.50 | 0.18 |
| A_52_P407796  | NM_008618 | Mdh1            | 17449  | malate dehydrogenase 1, NAD (soluble)                   | -3.51 | 0.50 | 0.30 |
| A_52_P611798  | NM_007840 | Ddx5            | 13207  | DEAD (Asp-Glu-Ala-Asp) box polypeptide 5                | -5.96 | 0.49 | 0.00 |
| A_51_P299287  | NM_053261 | Impa2           | 114663 | inositol (myo)-1(or 4)-monophosphatase 2                | -3.20 | 0.49 | 0.52 |
| A_51_P165617  | NM_172745 | Tufm            | 233870 | Tu translation elongation factor, mitochondrial         | -4.12 | 0.49 | 0.10 |
| A_51_P214663  | NM_016785 | Tpmt            | 22017  | thiopurine methyltransferase                            | -3.07 | 0.49 | 0.63 |
| A_51_P504588  | NM_027194 | Tm2d2           | 69742  | TM2 domain containing 2                                 | -3.88 | 0.49 | 0.16 |
| A_52_P1004624 | AK081083  | Mon2            | 67074  | MON2 homolog (yeast)                                    | -4.30 | 0.49 | 0.08 |
| A_51_P468294  | NM_017462 | Polg            | 18975  | polymerase (DNA directed), gamma                        | -4.32 | 0.49 | 0.08 |
| A_51_P255395  | NM_007738 | Col7a1          | 12836  | collagen, type VII, alpha 1                             | -3.81 | 0.49 | 0.17 |
| A_51_P149872  | NM_010596 | Kcna7           | 16495  | potassium voltage-gated channel, shaker-related subfam  | -3.22 | 0.49 | 0.49 |
| A_51_P313779  | NM_198248 | Zbtb40          | 230848 | zinc finger and BTB domain containing 40                | -3.29 | 0.49 | 0.42 |
| A_51_P125467  | NM_010515 | Igf2r           | 16004  | insulin-like growth factor 2 receptor                   | -3.73 | 0.49 | 0.21 |
| A_51_P174396  | NM_012019 | Aifm1           | 26926  | apoptosis-inducing factor, mitochondrion-associated 1   | -4.34 | 0.49 | 0.09 |
| A_52_P398334  | NM_177616 | Ccdc157         | 216516 | coiled-coil domain containing 157                       | -4.01 | 0.49 | 0.12 |
| A_51_P177622  | NM_025580 | Pnkd            | 56695  | paroxysmal nonkinesinogenic dyskinesia                  | -3.62 | 0.49 | 0.25 |
| A_51_P178735  | NM_146108 | Hibch           | 227095 | 3-hydroxyisobutyryl-Coenzyme A hydrolase                | -3.11 | 0.49 | 0.60 |
| A_52_P276748  | NM_026102 | Daam1           | 208846 | dishevelled associated activator of morphogenesis 1     | -3.43 | 0.49 | 0.34 |
| A_52_P522990  | BC039287  | Trub1           | 72133  | TruB pseudouridine (psi) synthase homolog 1 (E. coli)   | -3.90 | 0.49 | 0.17 |
| A_52_P668393  | AK028994  | Cyhr1           | 54151  | cysteine and histidine rich 1                           | -4.87 | 0.49 | 0.07 |
| A_52_P124083  | AK087552  | A530082C1320541 |        | RIKEN cDNA A530082C11 gene                              | -3.20 | 0.49 | 0.52 |
| A_52_P476973  | NM_008687 | Nfib            | 18028  | nuclear factor I/B                                      | -4.36 | 0.49 | 0.09 |

|              |            |                 |        |                                                           |       |      |      |
|--------------|------------|-----------------|--------|-----------------------------------------------------------|-------|------|------|
| A_52_P22781  | AK133399   | D330038O(330788 |        | RIKEN cDNA D330038O06 gene                                | -3.96 | 0.49 | 0.15 |
| A_52_P534203 | AK032463   | Pias2           | 17344  | protein inhibitor of activated STAT 2                     | -5.81 | 0.49 | 0.00 |
| A_52_P344376 | NM_013506  | Eif4a2          | 13682  | eukaryotic translation initiation factor 4A2              | -4.02 | 0.49 | 0.13 |
| A_52_P119721 | NA         | NA              | NA     | NA                                                        | -2.94 | 0.49 | 0.79 |
| A_52_P392833 | NA         | NA              | NA     | NA                                                        | -3.58 | 0.49 | 0.26 |
| A_51_P339232 | NM_009228  | Snta1           | 20648  | syntrophin, acidic 1                                      | -3.44 | 0.49 | 0.35 |
| A_51_P304412 | NM_008687  | Nfib            | 18028  | nuclear factor I/B                                        | -4.71 | 0.49 | 0.06 |
| A_51_P399652 | NM_029939  | Ccdc151         | 77609  | coiled-coil domain containing 151                         | -3.16 | 0.49 | 0.55 |
| A_51_P370101 | NM_029623  | 3110002H176482  |        | RIKEN cDNA 3110002H16 gene                                | -3.00 | 0.49 | 0.70 |
| A_51_P516615 | NM_026684  | Ndufb10         | 68342  | NADH dehydrogenase (ubiquinone) 1 beta subcomplex, 1      | -4.06 | 0.49 | 0.13 |
| A_51_P513460 | NM_015780  | Cfhr1           | 50702  | complement factor H-related 1                             | -3.31 | 0.49 | 0.40 |
| A_51_P142904 | NM_025939  | Paics           | 67054  | phosphoribosylaminoimidazole carboxylase, phosphorib      | -3.81 | 0.49 | 0.17 |
| A_51_P125351 | NM_026822  | Lce1b           | 68720  | late cornified envelope 1B                                | -3.57 | 0.49 | 0.27 |
| A_51_P471513 | AK080408   | Socs4           | 67296  | suppressor of cytokine signaling 4                        | -3.02 | 0.49 | 0.70 |
| A_52_P425734 | NM_145146  | Afm             | 280662 | afamin                                                    | -4.89 | 0.49 | 0.08 |
| A_52_P381958 | BC067002   | 4632419I2:74038 |        | RIKEN cDNA 4632419I22 gene                                | -3.13 | 0.49 | 0.58 |
| A_52_P272945 | NM_023243  | Ccnh            | 66671  | cyclin H                                                  | -4.46 | 0.49 | 0.05 |
| A_51_P201237 | NM_001040: | Larp1b          | 214048 | La ribonucleoprotein domain family, member 1B             | -4.68 | 0.49 | 0.06 |
| A_52_P280344 | NM_028412  | Ciz1            | 68379  | CDKN1A interacting zinc finger protein 1                  | -5.25 | 0.49 | 0.00 |
| A_51_P155085 | NM_172477  | Dennd2a         | 209773 | DENN/MADD domain containing 2A                            | -3.92 | 0.49 | 0.14 |
| A_52_P671769 | NM_176837  | Arhgap18        | 73910  | Rho GTPase activating protein 18                          | -3.07 | 0.49 | 0.63 |
| A_51_P464911 | NM_029619  | MsrB2           | 76467  | methionine sulfoxide reductase B2                         | -2.93 | 0.49 | 0.81 |
| A_51_P417469 | NM_026616  | Rnaseh2c        | 68209  | ribonuclease H2, subunit C                                | -3.99 | 0.49 | 0.12 |
| A_52_P506516 | NM_008010  | Fgfr3           | 14184  | fibroblast growth factor receptor 3                       | -2.93 | 0.49 | 0.82 |
| A_51_P206736 | NM_133657  | Cyp2a12         | 13085  | cytochrome P450, family 2, subfamily a, polypeptide 12    | -3.93 | 0.49 | 0.14 |
| A_52_P316644 | NM_009748  | Bet1            | 12068  | blocked early in transport 1 homolog (S. cerevisiae)      | -4.84 | 0.49 | 0.07 |
| A_51_P448618 | AK165240   | Slc16a10        | 72472  | solute carrier family 16 (monocarboxylic acid transporter | -3.64 | 0.49 | 0.24 |
| A_51_P182813 | NA         | NA              | NA     | NA                                                        | -5.07 | 0.49 | 0.00 |
| A_51_P137452 | NM_013809  | Cyp2g1          | 13108  | cytochrome P450, family 2, subfamily g, polypeptide 1     | -3.39 | 0.49 | 0.36 |
| A_52_P268720 | AK020667   | Helz            | 78455  | helicase with zinc finger domain                          | -2.85 | 0.49 | 0.95 |
| A_52_P499879 | NM_010363  | Gstz1           | 14874  | glutathione transferase zeta 1 (maleylacetoacetate isom   | -2.92 | 0.49 | 0.82 |
| A_51_P302453 | NM_172589  | Lhfp12          | 218454 | lipoma HMGIC fusion partner-like 2                        | -3.63 | 0.48 | 0.25 |
| A_52_P101333 | NM_009119  | Sap18           | 20220  | Sin3-associated polypeptide 18                            | -3.75 | 0.48 | 0.21 |
| A_52_P231847 | NM_145949  | Ido2            | 209176 | indoleamine 2,3-dioxygenase 2                             | -2.96 | 0.48 | 0.75 |

|              |           |           |        |                                                             |       |      |      |
|--------------|-----------|-----------|--------|-------------------------------------------------------------|-------|------|------|
| A_52_P442691 | NM_023644 | Mccc1     | 72039  | methylcrotonoyl-Coenzyme A carboxylase 1 (alpha)            | -3.74 | 0.48 | 0.21 |
| A_51_P333923 | NM_133681 | Tspan1    | 66805  | tetraspanin 1                                               | -2.84 | 0.48 | 0.96 |
| A_51_P189870 | AK129469  | Ears2     | 67417  | glutamyl-tRNA synthetase 2 (mitochondrial)(putative)        | -4.08 | 0.48 | 0.10 |
| A_52_P351925 | NM_146005 | Ank3      | 11735  | ankyrin 3, epithelial                                       | -3.49 | 0.48 | 0.31 |
| A_51_P268331 | NM_023270 | Rnf128    | 66889  | ring finger protein 128                                     | -3.06 | 0.48 | 0.65 |
| A_51_P444437 | NM_025968 | Ptgr1     | 67103  | prostaglandin reductase 1                                   | -3.03 | 0.48 | 0.68 |
| A_51_P466478 | NM_011213 | Ptprf     | 19268  | protein tyrosine phosphatase, receptor type, F              | -3.03 | 0.48 | 0.68 |
| A_51_P440315 | NM_145572 | Gys2      | 232493 | glycogen synthase 2                                         | -2.82 | 0.48 | 0.99 |
| A_52_P661722 | NM_133684 | Mosc2     | 67247  | MOCO sulphurase C-terminal domain containing 2              | -3.92 | 0.48 | 0.14 |
| A_51_P286327 | NM_175646 | Txn14b    | 234723 | thioredoxin-like 4B                                         | -3.86 | 0.48 | 0.16 |
| A_51_P233825 | NM_001042 | Akap1     | 11640  | A kinase (PRKA) anchor protein 1                            | -2.82 | 0.48 | 1.02 |
| A_51_P275395 | NM_133734 | Dcaf11    | 28199  | DDB1 and CUL4 associated factor 11                          | -3.18 | 0.48 | 0.53 |
| A_51_P103406 | NM_011708 | Vwf       | 22371  | Von Willebrand factor homolog                               | -3.49 | 0.48 | 0.31 |
| A_52_P579876 | NM_178622 | Suds3     | 71954  | suppressor of defective silencing 3 homolog (S. cerevisiae) | -3.44 | 0.48 | 0.35 |
| A_51_P298570 | NM_013506 | Eif4a2    | 13682  | eukaryotic translation initiation factor 4A2                | -3.56 | 0.48 | 0.28 |
| A_52_P3723   | BC096542  | Nfib      | 18028  | nuclear factor I/B                                          | -4.82 | 0.48 | 0.07 |
| A_52_P699954 | AK081401  | NA        | NA     | NA                                                          | -3.31 | 0.48 | 0.40 |
| A_52_P537696 | NM_145524 | Mettl8    | 228019 | methyltransferase like 8                                    | -3.70 | 0.48 | 0.22 |
| A_52_P661731 | NM_133684 | Mosc2     | 67247  | MOCO sulphurase C-terminal domain containing 2              | -5.05 | 0.48 | 0.00 |
| A_51_P336827 | NM_025558 | Cyb5b     | 66427  | cytochrome b5 type B                                        | -2.84 | 0.48 | 0.96 |
| A_51_P367395 | NM_138583 | D16H22S6E | 27883  | DNA segment, Chr 16, human D22S680E, expressed              | -2.92 | 0.48 | 0.82 |
| A_52_P496163 | AK082993  | Zfp697    | 242109 | zinc finger protein 697                                     | -3.87 | 0.48 | 0.16 |
| A_52_P329197 | NM_010049 | Dhfr      | 13361  | dihydrofolate reductase                                     | -4.05 | 0.48 | 0.13 |
| A_51_P265465 | NM_134130 | Abhd3     | 106861 | abhydrolase domain containing 3                             | -3.68 | 0.48 | 0.22 |
| A_51_P122825 | NM_010956 | Ogdh      | 18293  | oxoglutarate dehydrogenase (lipoamide)                      | -3.50 | 0.48 | 0.31 |
| A_52_P231729 | U96752    | H2-Q1     | 15006  | histocompatibility 2, Q region locus 1                      | -3.81 | 0.48 | 0.17 |
| A_52_P989584 | NA        | NA        | NA     | NA                                                          | -6.22 | 0.48 | 0.00 |
| A_52_P294123 | NM_178882 | D2hgdh    | 98314  | D-2-hydroxyglutarate dehydrogenase                          | -4.26 | 0.48 | 0.08 |
| A_51_P346045 | NM_053266 | Gtf2ird2  | 114674 | GTF2I repeat domain containing 2                            | -3.32 | 0.48 | 0.40 |
| A_51_P282975 | NM_023644 | Mccc1     | 72039  | methylcrotonoyl-Coenzyme A carboxylase 1 (alpha)            | -4.01 | 0.48 | 0.12 |
| A_52_P365615 | NM_172759 | Ces5      | 234673 | carboxylesterase 5                                          | -4.75 | 0.48 | 0.07 |
| A_51_P516870 | NM_008409 | Itn2a     | 16431  | integral membrane protein 2A                                | -3.26 | 0.48 | 0.45 |
| A_51_P475613 | NM_029629 | Fahd2a    | 68126  | fumarylacetoacetate hydrolase domain containing 2A          | -7.19 | 0.48 | 0.00 |
| A_52_P637418 | AK147993  | Wdr25     | 212198 | WD repeat domain 25                                         | -2.89 | 0.48 | 0.89 |

|              |            |           |        |                                                           |       |      |      |
|--------------|------------|-----------|--------|-----------------------------------------------------------|-------|------|------|
| A_51_P286357 | NM_139138  | Emr4      | 52614  | EGF-like module containing, mucin-like, hormone recept    | -3.29 | 0.48 | 0.43 |
| A_52_P35048  | NM_011340  | Serpinf1  | 20317  | serine (or cysteine) peptidase inhibitor, clade F, member | -3.84 | 0.48 | 0.18 |
| A_51_P177691 | NM_008075  | Gabbr1    | 14408  | gamma-aminobutyric acid (GABA) C receptor, subunit rhc    | -3.16 | 0.48 | 0.55 |
| A_51_P451767 | NA         | NA        | NA     | NA                                                        | -3.76 | 0.48 | 0.19 |
| A_52_P665723 | AK032804   | D5Ert579c | 320661 | DNA segment, Chr 5, ERATO Doi 579, expressed              | -3.37 | 0.48 | 0.37 |
| A_52_P384855 | NM_172577  | Slc25a21  | 217593 | solute carrier family 25 (mitochondrial oxodicarboxylate  | -4.74 | 0.48 | 0.07 |
| A_51_P301289 | NM_007507  | Atp5k     | 11958  | ATP synthase, H+ transporting, mitochondrial F1F0 comp    | -3.99 | 0.48 | 0.12 |
| A_52_P348922 | AK017896   | C2cd2     | 207781 | C2 calcium-dependent domain containing 2                  | -3.15 | 0.48 | 0.55 |
| A_52_P346033 | NM_026876  | 1190005F2 | 98685  | RIKEN cDNA 1190005F20 gene                                | -4.49 | 0.48 | 0.05 |
| A_51_P103397 | NM_011708  | Vwf       | 22371  | Von Willebrand factor homolog                             | -3.94 | 0.48 | 0.14 |
| A_52_P245620 | BB009967   | NA        | NA     | NA                                                        | -4.41 | 0.48 | 0.09 |
| A_52_P106429 | NM_008298  | Dnaja1    | 15502  | Dnaj (Hsp40) homolog, subfamily A, member 1               | -4.95 | 0.48 | 0.09 |
| A_51_P460710 | NM_172605  | Tdrd3     | 219249 | tudor domain containing 3                                 | -4.00 | 0.48 | 0.12 |
| A_51_P380824 | NM_146891  | Olfr1225  | 258893 | olfactory receptor 1225                                   | -2.89 | 0.48 | 0.89 |
| A_51_P472488 | NM_019836  | 2610024G1 | 156412 | RIKEN cDNA 2610024G14 gene                                | -5.55 | 0.47 | 0.00 |
| A_51_P204247 | NM_146148  | C8a       | 230558 | complement component 8, alpha polypeptide                 | -3.64 | 0.47 | 0.23 |
| A_51_P268734 | NM_133727  | Kptn      | 70394  | kaptin                                                    | -3.27 | 0.47 | 0.45 |
| A_51_P314273 | X14206     | Parp1     | 11545  | poly (ADP-ribose) polymerase family, member 1             | -3.19 | 0.47 | 0.52 |
| A_52_P657844 | AK038731   | Zbtb20    | 56490  | zinc finger and BTB domain containing 20                  | -3.44 | 0.47 | 0.35 |
| A_52_P308477 | NM_133727  | Kptn      | 70394  | kaptin                                                    | -3.94 | 0.47 | 0.14 |
| A_52_P244803 | XM_0010017 | D630033O  | 235302 | RIKEN cDNA D630033O11 gene                                | -3.98 | 0.47 | 0.12 |
| A_52_P618501 | NM_144913  | Mepce     | 231803 | methylphosphate capping enzyme                            | -3.55 | 0.47 | 0.27 |
| A_52_P356313 | XM_0010051 | NA        | NA     | NA                                                        | -3.31 | 0.47 | 0.42 |
| A_51_P303346 | NM_008298  | Dnaja1    | 15502  | Dnaj (Hsp40) homolog, subfamily A, member 1               | -5.30 | 0.47 | 0.00 |
| A_51_P519364 | NM_145986  | Fam83f    | 213956 | family with sequence similarity 83, member F              | -3.26 | 0.47 | 0.45 |
| A_51_P394394 | NM_027533  | Tspan2    | 70747  | tetraspanin 2                                             | -3.73 | 0.47 | 0.21 |
| A_52_P559467 | NA         | NA        | NA     | NA                                                        | -5.04 | 0.47 | 0.00 |
| A_52_P155990 | NM_130864  | Acaa1a    | 113868 | acetyl-Coenzyme A acyltransferase 1A                      | -4.46 | 0.47 | 0.05 |
| A_51_P283766 | NM_028199  | Plxdc1    | 72324  | plexin domain containing 1                                | -2.87 | 0.47 | 0.91 |
| A_52_P620496 | AK031480   | Gpr182    | 11536  | G protein-coupled receptor 182                            | -3.07 | 0.47 | 0.63 |
| A_51_P476481 | NM_145548  | Cyp2j13   | 230459 | cytochrome P450, family 2, subfamily j, polypeptide 13    | -3.98 | 0.47 | 0.12 |
| A_52_P155692 | NM_009176  | St3gal3   | 20441  | ST3 beta-galactoside alpha-2,3-sialyltransferase 3        | -4.19 | 0.47 | 0.11 |
| A_51_P385598 | NM_008063  | Slc37a4   | 14385  | solute carrier family 37 (glucose-6-phosphate transport   | -3.38 | 0.47 | 0.36 |
| A_52_P175190 | AK033431   | Egfr      | 13649  | epidermal growth factor receptor                          | -3.11 | 0.47 | 0.60 |

|              |           |                 |        |                                                                  |       |      |      |
|--------------|-----------|-----------------|--------|------------------------------------------------------------------|-------|------|------|
| A_52_P369310 | NM_010956 | Ogdh            | 18293  | oxoglutarate dehydrogenase (lipoamide)                           | -3.52 | 0.47 | 0.28 |
| A_51_P500056 | NM_019923 | Itp2            | 16439  | inositol 1,4,5-triphosphate receptor 2                           | -3.83 | 0.47 | 0.18 |
| A_51_P308362 | NM_201410 | Ugt1a6b         | 394435 | UDP glucuronosyltransferase 1 family, polypeptide A6B            | -5.51 | 0.47 | 0.00 |
| A_51_P419971 | BU515288  | Tmem106k        | 71900  | transmembrane protein 106B                                       | -3.02 | 0.47 | 0.70 |
| A_51_P177897 | NM_011665 | Ube2i           | 22196  | ubiquitin-conjugating enzyme E2I                                 | -3.60 | 0.47 | 0.26 |
| A_52_P339154 | NM_029398 | Tmem14a         | 75712  | transmembrane protein 14A                                        | -3.79 | 0.47 | 0.17 |
| A_52_P191210 | AK028720  | 9530091C0320440 |        | RIKEN cDNA 9530091C08 gene                                       | -3.31 | 0.47 | 0.40 |
| A_52_P160279 | NM_021414 | Ahcyl2          | 74340  | S-adenosylhomocysteine hydrolase-like 2                          | -2.87 | 0.47 | 0.92 |
| A_52_P660032 | NM_016856 | Cpsf2           | 51786  | cleavage and polyadenylation specific factor 2                   | -3.38 | 0.47 | 0.36 |
| A_51_P179789 | NM_145437 | Cd300ld         | 217305 | CD300 molecule-like family member d                              | -3.30 | 0.47 | 0.42 |
| A_52_P563450 | AK010171  | Brix1           | 67832  | BRX1, biogenesis of ribosomes, homolog ( <i>S. cerevisiae</i> )  | -4.15 | 0.47 | 0.11 |
| A_51_P111762 | NM_011804 | Creg1           | 433375 | cellular repressor of E1A-stimulated genes 1                     | -4.60 | 0.47 | 0.06 |
| A_51_P335419 | NM_027945 | Csl             | 71832  | citrate synthase like                                            | -5.18 | 0.47 | 0.00 |
| A_51_P345836 | NM_011871 | Prkra           | 23992  | protein kinase, interferon inducible double stranded RNA         | -2.88 | 0.47 | 0.89 |
| A_52_P682745 | NM_172803 | Dock4           | 238130 | dedicator of cytokinesis 4                                       | -3.12 | 0.47 | 0.59 |
| A_51_P291135 | NM_007996 | Fdx1            | 14148  | ferredoxin 1                                                     | -6.19 | 0.47 | 0.00 |
| A_52_P156110 | AK042138  | Ikbkg           | 16151  | inhibitor of kappaB kinase gamma                                 | -4.01 | 0.46 | 0.12 |
| A_52_P15495  | NM_021496 | Pvrl3           | 58998  | poliovirus receptor-related 3                                    | -4.02 | 0.46 | 0.13 |
| A_52_P113817 | NM_001031 | Agxt2           | 268782 | alanine-glyoxylate aminotransferase 2                            | -4.26 | 0.46 | 0.08 |
| A_52_P61691  | NM_181858 | Cd59b           | 333883 | CD59b antigen                                                    | -3.90 | 0.46 | 0.17 |
| A_52_P318053 | NA        | NA              | NA     | NA                                                               | -3.92 | 0.46 | 0.14 |
| A_52_P569348 | NM_010022 | Dbt             | 13171  | dihydrolipoamide branched chain transacylase E2                  | -4.13 | 0.46 | 0.11 |
| A_52_P33147  | AK086149  | Sox5            | 20678  | SRY-box containing gene 5                                        | -3.53 | 0.46 | 0.29 |
| A_52_P188099 | AK033507  | Gne             | 50798  | glucosamine                                                      | -2.82 | 0.46 | 0.99 |
| A_51_P374752 | NM_011255 | Rbp4            | 19662  | retinol binding protein 4, plasma                                | -4.36 | 0.46 | 0.09 |
| A_51_P474188 | NM_198942 | Dhx57           | 106794 | DEAH (Asp-Glu-Ala-Asp/His) box polypeptide 57                    | -3.81 | 0.46 | 0.17 |
| A_52_P286360 | NM_008769 | Otc             | 18416  | ornithine transcarbamylase                                       | -4.15 | 0.46 | 0.11 |
| A_52_P329408 | AK147591  | Sipa1l1         | 217692 | signal-induced proliferation-associated 1 like 1                 | -3.56 | 0.46 | 0.28 |
| A_51_P320089 | NM_008129 | Gclm            | 14630  | glutamate-cysteine ligase, modifier subunit                      | -2.90 | 0.46 | 0.87 |
| A_52_P297457 | BC066053  | 0610030E268364  |        | RIKEN cDNA 0610030E20 gene                                       | -3.33 | 0.46 | 0.40 |
| A_52_P456977 | NM_016874 | Deaf1           | 54006  | deformed epidermal autoregulatory factor 1 ( <i>Drosophila</i> ) | -3.76 | 0.46 | 0.19 |
| A_52_P453778 | XM_620640 | NA              | NA     | NA                                                               | -3.96 | 0.46 | 0.15 |
| A_52_P366116 | NM_028233 | Lrp4            | 72416  | leucine-rich PPR-motif containing                                | -3.16 | 0.46 | 0.55 |
| A_52_P667477 | NM_148925 | Fyco1           | 17281  | FYVE and coiled-coil domain containing 1                         | -2.83 | 0.46 | 0.98 |

|              |           |           |        |                                                            |       |      |      |
|--------------|-----------|-----------|--------|------------------------------------------------------------|-------|------|------|
| A_51_P479444 | NM_010544 | lhh       | 16147  | Indian hedgehog                                            | -6.59 | 0.46 | 0.00 |
| A_52_P663742 | AK076333  | Ganc      | 76051  | glucosidase, alpha; neutral C                              | -3.40 | 0.46 | 0.36 |
| A_52_P618693 | NM_011336 | Ccl27a    | 20301  | chemokine (C-C motif) ligand 27A                           | -3.74 | 0.46 | 0.21 |
| A_51_P484842 | NM_007493 | Asgr2     | 11890  | asialoglycoprotein receptor 2                              | -4.89 | 0.46 | 0.08 |
| A_51_P276039 | NM_175150 | Txndc15   | 69672  | thioredoxin domain containing 15                           | -3.61 | 0.46 | 0.25 |
| A_51_P515949 | NM_147059 | Olfrr668  | 259061 | olfactory receptor 668                                     | -3.56 | 0.46 | 0.28 |
| A_51_P218179 | NM_008618 | Mdh1      | 17449  | malate dehydrogenase 1, NAD (soluble)                      | -4.74 | 0.46 | 0.07 |
| A_51_P225853 | NM_008786 | Pcmt1     | 18537  | protein-L-isoaspartate (D-aspartate) O-methyltransferase   | -5.56 | 0.46 | 0.00 |
| A_51_P392303 | NM_010733 | Lrrn3     | 16981  | leucine rich repeat protein 3, neuronal                    | -3.14 | 0.46 | 0.58 |
| A_52_P194242 | NM_001039 | Sel1l     | 20338  | sel-1 suppressor of lin-12-like (C. elegans)               | -3.41 | 0.46 | 0.34 |
| A_51_P218137 | AK008925  | Mettl7a1  | 70152  | methyltransferase like 7A1                                 | -3.84 | 0.46 | 0.18 |
| A_51_P441387 | NM_177645 | 1110028C1 | 68691  | RIKEN cDNA 1110028C15 gene                                 | -5.71 | 0.46 | 0.00 |
| A_52_P383526 | NA        | NA        | NA     | NA                                                         | -3.19 | 0.46 | 0.52 |
| A_52_P640413 | NM_145580 | Tmem149   | 101883 | transmembrane protein 149                                  | -3.60 | 0.46 | 0.26 |
| A_52_P868798 | NA        | NA        | NA     | NA                                                         | -4.67 | 0.46 | 0.06 |
| A_52_P301821 | NM_053078 | DOH4S114  | 27528  | DNA segment, human D4S114                                  | -3.33 | 0.46 | 0.40 |
| A_51_P184886 | NM_011920 | Abcg2     | 26357  | ATP-binding cassette, sub-family G (WHITE), member 2       | -3.86 | 0.46 | 0.16 |
| A_52_P143357 | NA        | NA        | NA     | NA                                                         | -2.97 | 0.46 | 0.74 |
| A_52_P521054 | NM_011459 | Serpinb8  | 20725  | serine (or cysteine) peptidase inhibitor, clade B, member  | -2.81 | 0.46 | 1.02 |
| A_52_P189132 | DV054273  | Thap1     | 73754  | THAP domain containing, apoptosis associated protein 1     | -4.05 | 0.46 | 0.13 |
| A_51_P475689 | NM_026972 | Cd209b    | 69165  | CD209b antigen                                             | -3.29 | 0.46 | 0.42 |
| A_52_P641282 | AK005692  | Pdilt     | 71830  | protein disulfide isomerase-like, testis expressed         | -3.23 | 0.46 | 0.49 |
| A_51_P398260 | NM_182839 | Tppp      | 72948  | tubulin polymerization promoting protein                   | -4.17 | 0.46 | 0.11 |
| A_51_P209401 | BC062811  | 1810020D1 | 66273  | RIKEN cDNA 1810020D17 gene                                 | -3.33 | 0.46 | 0.40 |
| A_51_P166099 | NM_019957 | Dnase2b   | 56629  | deoxyribonuclease II beta                                  | -4.00 | 0.46 | 0.12 |
| A_51_P376789 | NM_145387 | Ath1l     | 212974 | ATH1, acid trehalase-like 1 (yeast)                        | -3.24 | 0.46 | 0.48 |
| A_52_P565549 | NM_173788 | Npr2      | 230103 | natriuretic peptide receptor 2                             | -3.05 | 0.46 | 0.66 |
| A_52_P633752 | NM_007462 | Apc       | 11789  | adenomatosis polyposis coli                                | -3.58 | 0.46 | 0.26 |
| A_51_P352738 | NM_033564 | Mpv17l    | 93734  | Mpv17 transgene, kidney disease mutant-like                | -3.10 | 0.46 | 0.60 |
| A_51_P138060 | NM_011883 | Rnf13     | 24017  | ring finger protein 13                                     | -4.47 | 0.46 | 0.05 |
| A_51_P481968 | NM_026036 | Cmtm6     | 67213  | CKLF-like MARVEL transmembrane domain containing 6         | -4.66 | 0.46 | 0.06 |
| A_51_P411909 | NM_178848 | Sirt5     | 68346  | sirtuin 5 (silent mating type information regulation 2 hon | -3.52 | 0.46 | 0.28 |
| A_52_P274028 | AK078039  | Ssr1      | 107513 | signal sequence receptor, alpha                            | -4.65 | 0.46 | 0.06 |
| A_51_P173906 | NM_026658 | Mto1      | 68291  | mitochondrial translation optimization 1 homolog (S. cer   | -4.87 | 0.46 | 0.07 |



|              |           |           |        |                                                          |       |      |      |
|--------------|-----------|-----------|--------|----------------------------------------------------------|-------|------|------|
| A_52_P217474 | NM_025987 | Ndufa6    | 67130  | NADH dehydrogenase (ubiquinone) 1 alpha subcomplex,      | -3.93 | 0.46 | 0.14 |
| A_52_P181060 | NM_022988 | Nif3l1    | 65102  | Ngg1 interacting factor 3-like 1 (S. pombe)              | -3.70 | 0.46 | 0.22 |
| A_52_P244312 | AK158571  | Svip      | 75744  | small VCP/p97-interacting protein                        | -3.43 | 0.46 | 0.34 |
| A_51_P301274 | AK019926  | 5330431K0 | 68189  | RIKEN cDNA 5330431K02 gene                               | -2.98 | 0.46 | 0.72 |
| A_52_P673722 | NM_134094 | Ncald     | 52589  | neurocalcin delta                                        | -3.21 | 0.46 | 0.50 |
| A_51_P238533 | AK020301  | Col4a3bp  | 68018  | collagen, type IV, alpha 3 (Goodpasture antigen) binding | -2.94 | 0.46 | 0.79 |
| A_52_P552665 | NM_008057 | Fzd7      | 14369  | frizzled homolog 7 (Drosophila)                          | -5.00 | 0.46 | 0.00 |
| A_51_P398235 | BC079852  | Dnajc11   | 230935 | Dnaj (Hsp40) homolog, subfamily C, member 11             | -4.84 | 0.46 | 0.07 |
| A_52_P201972 | AK037342  | Zfp148    | 22661  | zinc finger protein 148                                  | -2.95 | 0.45 | 0.76 |
| A_52_P662711 | NM_027211 | Anxa13    | 69787  | annexin A13                                              | -3.14 | 0.45 | 0.58 |
| A_51_P134627 | NM_080857 | Asb13     | 142688 | ankyrin repeat and SOCS box-containing 13                | -4.87 | 0.45 | 0.07 |
| A_51_P451335 | NM_008867 | Pla2r1    | 18779  | phospholipase A2 receptor 1                              | -4.46 | 0.45 | 0.05 |
| A_51_P350368 | NM_027986 | Cdadc1    | 71891  | cytidine and dCMP deaminase domain containing 1          | -4.11 | 0.45 | 0.10 |
| A_51_P345248 | NM_053196 | Sfxn2     | 94279  | sideroflexin 2                                           | -3.16 | 0.45 | 0.55 |
| A_52_P66130  | NM_201600 | Myo5b     | 17919  | myosin VB                                                | -3.56 | 0.45 | 0.27 |
| A_51_P278550 | NM_134118 | Tecr      | 106529 | trans-2,3-enoyl-CoA reductase                            | -3.52 | 0.45 | 0.29 |
| A_52_P104108 | BC059866  | Shc2      | 216148 | SHC (Src homology 2 domain containing) transforming pr   | -3.66 | 0.45 | 0.24 |
| A_52_P348709 | NM_011804 | Creg1     | 433375 | cellular repressor of E1A-stimulated genes 1             | -4.60 | 0.45 | 0.06 |
| A_51_P257457 | NM_013589 | Ltbp2     | 16997  | latent transforming growth factor beta binding protein 2 | -2.97 | 0.45 | 0.75 |
| A_51_P145735 | NM_025421 | Acyp1     | 66204  | acylphosphatase 1, erythrocyte (common) type             | -3.27 | 0.45 | 0.44 |
| A_52_P148184 | NM_028166 | 1600014C1 | 72244  | RIKEN cDNA 1600014C10 gene                               | -3.45 | 0.45 | 0.33 |
| A_51_P119760 | NM_010378 | H2-Aa     | 14960  | histocompatibility 2, class II antigen A, alpha          | -2.81 | 0.45 | 1.02 |
| A_51_P395555 | NM_178600 | Vkorc1    | 27973  | vitamin K epoxide reductase complex, subunit 1           | -3.20 | 0.45 | 0.52 |
| A_51_P364185 | XM_486062 | NA        | NA     | NA                                                       | -3.89 | 0.45 | 0.16 |
| A_51_P260035 | NM_025535 | Sar1b     | 66397  | SAR1 gene homolog B (S. cerevisiae)                      | -3.73 | 0.45 | 0.21 |
| A_51_P165934 | NM_008831 | Phb       | 18673  | prohibitin                                               | -4.32 | 0.45 | 0.09 |
| A_52_P635278 | NM_199307 | Ece1      | 230857 | endothelin converting enzyme 1                           | -3.14 | 0.45 | 0.58 |
| A_51_P403193 | XM_193868 | NA        | NA     | NA                                                       | -3.27 | 0.45 | 0.45 |
| A_51_P236469 | NM_025633 | Metap11   | 66559  | methionine aminopeptidase-like 1                         | -4.11 | 0.45 | 0.10 |
| A_52_P178866 | BC094349  | Lrp3      | 435965 | low density lipoprotein receptor-related protein 3       | -3.80 | 0.45 | 0.17 |
| A_51_P517672 | NM_178779 | Rnf152    | 320311 | ring finger protein 152                                  | -3.63 | 0.45 | 0.25 |
| A_52_P376214 | NM_001037 | Cstf3     | 228410 | cleavage stimulation factor, 3' pre-RNA, subunit 3       | -3.10 | 0.45 | 0.60 |
| A_52_P409055 | BC078641  | Dcaf8     | 98193  | DDB1 and CUL4 associated factor 8                        | -6.45 | 0.45 | 0.00 |
| A_52_P449718 | BC039980  | Megf6     | 230971 | multiple EGF-like-domains 6                              | -2.84 | 0.45 | 0.96 |

|              |           |           |        |                                                           |       |      |      |
|--------------|-----------|-----------|--------|-----------------------------------------------------------|-------|------|------|
| A_51_P164630 | NM_026808 | Fitm1     | 68680  | fat storage-inducing transmembrane protein 1              | -3.83 | 0.45 | 0.18 |
| A_51_P175581 | NM_183028 | Pcmdt1    | 319263 | protein-L-isoaspartate (D-aspartate) O-methyltransferase  | -3.44 | 0.45 | 0.35 |
| A_51_P291129 | NM_007996 | Fdx1      | 14148  | ferredoxin 1                                              | -4.99 | 0.45 | 0.00 |
| A_52_P633410 | NM_020590 | Gabarapl1 | 57436  | gamma-aminobutyric acid (GABA) A receptor-associated      | -3.21 | 0.45 | 0.50 |
| A_51_P512519 | M29009    | EG214403  | 214403 | predicted gene, EG214403                                  | -3.63 | 0.45 | 0.25 |
| A_52_P387564 | AK198605  | NA        | NA     | NA                                                        | -3.49 | 0.45 | 0.31 |
| A_51_P125205 | NM_007472 | Aqp1      | 11826  | aquaporin 1                                               | -3.09 | 0.45 | 0.62 |
| A_51_P311319 | NM_029022 | Scrn3     | 74616  | secernin 3                                                | -3.50 | 0.45 | 0.31 |
| A_51_P156708 | NM_011789 | Apc2      | 23805  | adenomatosis polyposis coli 2                             | -3.86 | 0.45 | 0.16 |
| A_51_P515446 | NM_018887 | Cyp39a1   | 56050  | cytochrome P450, family 39, subfamily a, polypeptide 1    | -4.29 | 0.45 | 0.08 |
| A_51_P505530 | NM_031176 | Tnxb      | 81877  | tenascin XB                                               | -3.86 | 0.45 | 0.16 |
| A_51_P291062 | NM_028266 | Col16a1   | 107581 | collagen, type XVI, alpha 1                               | -3.70 | 0.45 | 0.22 |
| A_52_P134914 | AK033990  | Slc30a9   | 109108 | solute carrier family 30 (zinc transporter), member 9     | -3.48 | 0.45 | 0.32 |
| A_52_P487599 | NM_178413 | Thnsl2    | 232078 | threonine synthase-like 2 (bacterial)                     | -3.69 | 0.45 | 0.22 |
| A_52_P224413 | XR_004220 | NA        | NA     | NA                                                        | -3.12 | 0.45 | 0.60 |
| A_51_P322396 | NM_207216 | Ugt3a1    | 105887 | UDP glycosyltransferases 3 family, polypeptide A1         | -3.05 | 0.45 | 0.66 |
| A_52_P884435 | AK079271  | Furin     | 18550  | furin (paired basic amino acid cleaving enzyme)           | -2.98 | 0.45 | 0.72 |
| A_51_P208537 | XM_902328 | NA        | NA     | NA                                                        | -3.04 | 0.45 | 0.67 |
| A_52_P15197  | NM_001024 | Dcun1d2   | 102323 | DCN1, defective in cullin neddylation 1, domain containir | -3.49 | 0.45 | 0.31 |
| A_52_P355813 | NM_028793 | Acbd5     | 74159  | acyl-Coenzyme A binding domain containing 5               | -2.99 | 0.45 | 0.71 |
| A_51_P508485 | NM_028651 | Tmtc4     | 70551  | transmembrane and tetratricopeptide repeat containing     | -3.22 | 0.45 | 0.49 |
| A_51_P430585 | NM_026740 | Slc46a1   | 52466  | solute carrier family 46, member 1                        | -2.96 | 0.45 | 0.75 |
| A_51_P159552 | AK159076  | Sin3b     | 20467  | transcriptional regulator, SIN3B (yeast)                  | -4.05 | 0.45 | 0.13 |
| A_52_P343306 | NM_010378 | H2-Aa     | 14960  | histocompatibility 2, class II antigen A, alpha           | -2.94 | 0.45 | 0.79 |
| A_51_P324303 | NM_153789 | Myliip    | 218203 | myosin regulatory light chain interacting protein         | -4.07 | 0.45 | 0.10 |
| A_52_P379256 | NM_024434 | Lap3      | 66988  | leucine aminopeptidase 3                                  | -3.30 | 0.45 | 0.43 |
| A_51_P390260 | NM_026444 | Cs        | 12974  | citrate synthase                                          | -4.94 | 0.45 | 0.08 |
| A_51_P346715 | NM_023665 | D4Wsu53e  | 27981  | DNA segment, Chr 4, Wayne State University 53, expressi   | -6.29 | 0.45 | 0.00 |
| A_51_P474496 | NM_009933 | Col6a1    | 12833  | collagen, type VI, alpha 1                                | -3.18 | 0.45 | 0.53 |
| A_51_P125385 | NM_031248 | Robld3    | 83409  | roadblock domain containing 3                             | -4.00 | 0.45 | 0.12 |
| A_51_P466221 | NM_144547 | Amhr2     | 110542 | anti-Mullerian hormone type 2 receptor                    | -3.59 | 0.45 | 0.26 |
| A_51_P509679 | BC004786  | Igh-VJ558 | 16061  | immunoglobulin heavy chain (J558 family)                  | -4.34 | 0.45 | 0.09 |
| A_51_P212592 | NM_173749 | Pamr1     | 210622 | peptidase domain containing associated with muscle regi   | -4.95 | 0.45 | 0.09 |
| A_52_P129388 | NM_025685 | Col27a1   | 373864 | collagen, type XXVII, alpha 1                             | -4.96 | 0.44 | 0.00 |

|              |           |                 |        |                                                             |       |      |      |
|--------------|-----------|-----------------|--------|-------------------------------------------------------------|-------|------|------|
| A_51_P142896 | NM_007652 | Cd59a           | 12509  | CD59a antigen                                               | -3.35 | 0.44 | 0.38 |
| A_52_P98531  | BC031139  | Nlrp6           | 101613 | NLR family, pyrin domain containing 6                       | -4.08 | 0.44 | 0.10 |
| A_51_P134574 | AK030305  | Col4a3bp        | 68018  | collagen, type IV, alpha 3 (Goodpasture antigen) binding    | -2.90 | 0.44 | 0.85 |
| A_51_P503654 | NM_178577 | Tmem205         | 235043 | transmembrane protein 205                                   | -4.46 | 0.44 | 0.05 |
| A_52_P556328 | NM_001042 | Akap1           | 11640  | A kinase (PRKA) anchor protein 1                            | -3.01 | 0.44 | 0.70 |
| A_51_P374464 | NM_013541 | Gstp1           | 14870  | glutathione S-transferase, pi 1                             | -2.92 | 0.44 | 0.82 |
| A_51_P476209 | NM_019569 | Fscn3           | 56223  | fascin homolog 3, actin-bundling protein, testicular (Stro  | -4.71 | 0.44 | 0.06 |
| A_51_P299266 | NM_025598 | Ppdpf           | 66496  | pancreatic progenitor cell differentiation and proliferatio | -3.87 | 0.44 | 0.16 |
| A_51_P312275 | NM_026708 | Tlcd1           | 68385  | TLC domain containing 1                                     | -4.47 | 0.44 | 0.05 |
| A_51_P183803 | NM_009174 | Siah2           | 20439  | seven in absentia 2                                         | -4.75 | 0.44 | 0.07 |
| A_52_P85152  | NM_175324 | Acad11          | 102632 | acyl-Coenzyme A dehydrogenase family, member 11             | -2.92 | 0.44 | 0.82 |
| A_51_P118320 | NM_138601 | D10Jhu81e       | 28295  | DNA segment, Chr 10, Johns Hopkins University 81 expre      | -4.18 | 0.44 | 0.11 |
| A_51_P133097 | AK018420  | 8430416G171469  |        | RIKEN cDNA 8430416G17 gene                                  | -4.95 | 0.44 | 0.09 |
| A_51_P443082 | NM_013855 | Abca3           | 27410  | ATP-binding cassette, sub-family A (ABC1), member 3         | -3.39 | 0.44 | 0.36 |
| A_52_P671525 | NM_175446 | Zmat1           | 215693 | zinc finger, matrin type 1                                  | -3.20 | 0.44 | 0.52 |
| A_51_P226453 | NM_025590 | Acot11          | 329910 | acyl-CoA thioesterase 11                                    | -4.10 | 0.44 | 0.10 |
| A_52_P404533 | NM_013560 | Hspb1           | 15507  | heat shock protein 1                                        | -3.60 | 0.44 | 0.26 |
| A_52_P134141 | NM_025574 | Pigy            | 66459  | phosphatidylinositol glycan anchor biosynthesis, class Y    | -4.17 | 0.44 | 0.11 |
| A_52_P399646 | NM_025343 | Rmnd1           | 66084  | required for meiotic nuclear division 1 homolog (S. cerev   | -3.71 | 0.44 | 0.20 |
| A_51_P193536 | NM_016892 | Ccs             | 12460  | copper chaperone for superoxide dismutase                   | -4.12 | 0.44 | 0.10 |
| A_52_P403157 | AK140498  | Sorbs2          | 234214 | sorbin and SH3 domain containing 2                          | -2.96 | 0.44 | 0.76 |
| A_52_P423188 | AF245475  | Mlxipl          | 58805  | MLX interacting protein-like                                | -3.69 | 0.44 | 0.22 |
| A_52_P338479 | AK039015  | Unc13b          | 22249  | unc-13 homolog B (C. elegans)                               | -4.64 | 0.44 | 0.06 |
| A_51_P429682 | NM_007898 | Ebp             | 13595  | phenylalkylamine Ca2+ antagonist (emopamil) binding pr      | -4.15 | 0.44 | 0.11 |
| A_51_P419439 | NM_010321 | Gnmt            | 14711  | glycine N-methyltransferase                                 | -4.18 | 0.44 | 0.11 |
| A_51_P418765 | NM_009266 | Sephs2          | 20768  | selenophosphate synthetase 2                                | -2.99 | 0.44 | 0.71 |
| A_52_P448106 | AK018520  | 9030420J0.71544 |        | RIKEN cDNA 9030420J04 gene                                  | -3.51 | 0.44 | 0.29 |
| A_52_P672740 | NM_019491 | Rala            | 56044  | v-ral simian leukemia viral oncogene homolog A (ras relat   | -3.63 | 0.44 | 0.25 |
| A_51_P183051 | NM_133995 | Upb1            | 103149 | ureidopropionase, beta                                      | -3.46 | 0.44 | 0.33 |
| A_52_P391718 | NM_009079 | Rpl22           | 19934  | ribosomal protein L22                                       | -3.91 | 0.44 | 0.14 |
| A_51_P410823 | NM_023281 | Sdha            | 66945  | succinate dehydrogenase complex, subunit A, flavoprote      | -3.99 | 0.44 | 0.12 |
| A_51_P389543 | NM_054053 | Gpr98           | 110789 | G protein-coupled receptor 98                               | -3.79 | 0.44 | 0.17 |
| A_51_P262228 | NM_145466 | A2ld1           | 223267 | AIG2-like domain 1                                          | -3.64 | 0.44 | 0.23 |
| A_52_P851171 | AK036477  | NA              | NA     | NA                                                          | -2.91 | 0.44 | 0.85 |

|              |           |            |        |                                                          |       |      |      |
|--------------|-----------|------------|--------|----------------------------------------------------------|-------|------|------|
| A_51_P125260 | NM_177470 | Acaa2      | 52538  | acetyl-Coenzyme A acyltransferase 2 (mitochondrial 3-ox  | -5.65 | 0.44 | 0.00 |
| A_51_P295896 | NM_028934 | 4930452B0  | 74430  | RIKEN cDNA 4930452B06 gene                               | -4.63 | 0.44 | 0.06 |
| A_52_P485939 | NM_026228 | Slc39a8    | 67547  | solute carrier family 39 (metal ion transporter), member | -3.61 | 0.44 | 0.25 |
| A_52_P34031  | NM_029331 | 1700019G17 | 5541   | RIKEN cDNA 1700019G17 gene                               | -3.47 | 0.44 | 0.32 |
| A_52_P482124 | NM_026455 | Fam32a     | 67922  | family with sequence similarity 32, member A             | -2.95 | 0.44 | 0.76 |
| A_52_P674386 | AK087243  | Tmcc1      | 330401 | transmembrane and coiled coil domains 1                  | -3.49 | 0.44 | 0.31 |
| A_51_P299632 | NM_027641 | Spef1      | 70997  | sperm flagellar 1                                        | -4.58 | 0.44 | 0.06 |
| A_52_P545181 | NM_021371 | Caln1      | 140904 | calneuron 1                                              | -4.18 | 0.44 | 0.11 |
| A_52_P6045   | NM_029522 | Gpsm2      | 76123  | G-protein signalling modulator 2 (AGS3-like, C. elegans) | -3.06 | 0.44 | 0.65 |
| A_51_P174422 | NM_013761 | Srr        | 27364  | serine racemase                                          | -3.10 | 0.44 | 0.60 |
| A_52_P219141 | NM_028439 | 3110009E1  | 73103  | RIKEN cDNA 3110009E18 gene                               | -3.20 | 0.44 | 0.52 |
| A_52_P78514  | AK054415  | Pik3c2g    | 18705  | phosphatidylinositol 3-kinase, C2 domain containing, gan | -3.23 | 0.44 | 0.49 |
| A_51_P238183 | XM_903670 | NA         | NA     | NA                                                       | -4.31 | 0.44 | 0.08 |
| A_51_P161890 | NM_010189 | Fcgrt      | 14132  | Fc receptor, IgG, alpha chain transporter                | -4.43 | 0.44 | 0.09 |
| A_52_P335907 | NM_026172 | Decr1      | 67460  | 2,4-dienoyl CoA reductase 1, mitochondrial               | -4.67 | 0.44 | 0.06 |
| A_51_P187507 | NM_028037 | Acad10     | 71985  | acyl-Coenzyme A dehydrogenase family, member 10          | -5.19 | 0.44 | 0.00 |
| A_51_P496462 | NM_145398 | Casd1      | 213819 | CAS1 domain containing 1                                 | -3.03 | 0.44 | 0.68 |
| A_52_P92472  | NA        | NA         | NA     | NA                                                       | -4.30 | 0.44 | 0.08 |
| A_52_P296109 | AK078667  | Cstf1      | 67337  | cleavage stimulation factor, 3' pre-RNA, subunit 1       | -4.26 | 0.44 | 0.08 |
| A_52_P370225 | NM_027062 | C8g        | 69379  | complement component 8, gamma polypeptide                | -4.85 | 0.44 | 0.07 |
| A_51_P290526 | NM_011994 | Abcd2      | 26874  | ATP-binding cassette, sub-family D (ALD), member 2       | -3.41 | 0.44 | 0.34 |
| A_51_P343429 | NM_026331 | Slc25a37   | 67712  | solute carrier family 25, member 37                      | -4.35 | 0.44 | 0.09 |
| A_51_P240857 | NM_144807 | Chpt1      | 212862 | choline phosphotransferase 1                             | -2.97 | 0.43 | 0.75 |
| A_51_P152578 | XM_131566 | NA         | NA     | NA                                                       | -4.31 | 0.43 | 0.08 |
| A_51_P513573 | NM_145603 | Ces2       | 234671 | carboxylesterase 2                                       | -3.61 | 0.43 | 0.25 |
| A_52_P588483 | NM_010180 | Fbln1      | 14114  | fibulin 1                                                | -2.81 | 0.43 | 1.02 |
| A_51_P462102 | BC052391  | Gpr125     | 70693  | G protein-coupled receptor 125                           | -5.46 | 0.43 | 0.00 |
| A_51_P366960 | NM_016763 | Hsd17b10   | 15108  | hydroxysteroid (17-beta) dehydrogenase 10                | -3.85 | 0.43 | 0.16 |
| A_51_P237890 | NA        | NA         | NA     | NA                                                       | -3.38 | 0.43 | 0.36 |
| A_51_P312846 | NM_023605 | Fbxo9      | 71538  | f-box protein 9                                          | -3.11 | 0.43 | 0.60 |
| A_52_P150950 | NM_153157 | Olfm3      | 229759 | olfactomedin 3                                           | -4.69 | 0.43 | 0.06 |
| A_51_P513992 | NM_139151 | Spag4      | 245865 | sperm associated antigen 4                               | -5.72 | 0.43 | 0.00 |
| A_51_P193302 | NM_025305 | Mrps7      | 50529  | mitochondrial ribosomal protein S7                       | -3.73 | 0.43 | 0.21 |
| A_51_P185229 | NM_007553 | Bmp2       | 12156  | bone morphogenetic protein 2                             | -2.89 | 0.43 | 0.89 |

|              |           |                |        |                                                         |       |      |      |
|--------------|-----------|----------------|--------|---------------------------------------------------------|-------|------|------|
| A_51_P304397 | BC100404  | Cpm            | 70574  | carboxypeptidase M                                      | -3.02 | 0.43 | 0.70 |
| A_51_P130057 | NM_175523 | Ppm1k          | 243382 | protein phosphatase 1K (PP2C domain containing)         | -2.91 | 0.43 | 0.85 |
| A_51_P327451 | NM_009653 | Alas2          | 11656  | aminolevulinic acid synthase 2, erythroid               | -3.92 | 0.43 | 0.14 |
| A_51_P432563 | NM_031178 | Tlr9           | 81897  | toll-like receptor 9                                    | -3.35 | 0.43 | 0.38 |
| A_51_P287001 | NM_019503 | Fxyd1          | 56188  | FXYD domain-containing ion transport regulator 1        | -3.83 | 0.43 | 0.18 |
| A_51_P443618 | NM_026686 | 0610011F068347 |        | RIKEN cDNA 0610011F06 gene                              | -5.86 | 0.43 | 0.00 |
| A_51_P114826 | NM_019707 | Cdh13          | 12554  | cadherin 13                                             | -5.11 | 0.43 | 0.00 |
| A_51_P110381 | NM_144943 | Cd207          | 246278 | CD207 antigen                                           | -2.85 | 0.43 | 0.95 |
| A_52_P190527 | BC019948  | Gpatch8        | 237943 | G patch domain containing 8                             | -4.77 | 0.43 | 0.07 |
| A_51_P208555 | NM_026172 | Decr1          | 67460  | 2,4-dienoyl CoA reductase 1, mitochondrial              | -3.52 | 0.43 | 0.29 |
| A_52_P576208 | XM_988947 | A930018M328399 |        | RIKEN cDNA A930018M24 gene                              | -2.92 | 0.43 | 0.82 |
| A_51_P359516 | NM_199223 | Rtn4rl2        | 269295 | reticulon 4 receptor-like 2                             | -3.29 | 0.43 | 0.42 |
| A_52_P63368  | BC066830  | Wdr67          | 210544 | WD repeat domain 67                                     | -3.00 | 0.43 | 0.70 |
| A_51_P483159 | NM_177157 | Gchfr          | 320415 | GTP cyclohydrolase I feedback regulator                 | -5.93 | 0.43 | 0.00 |
| A_51_P352057 | NM_008819 | Pemt           | 18618  | phosphatidylethanolamine N-methyltransferase            | -3.53 | 0.43 | 0.28 |
| A_51_P331507 | NM_173011 | Idh2           | 269951 | isocitrate dehydrogenase 2 (NADP+), mitochondrial       | -4.25 | 0.43 | 0.08 |
| A_52_P671916 | NM_172783 | Phka2          | 110094 | phosphorylase kinase alpha 2                            | -2.97 | 0.43 | 0.75 |
| A_51_P114634 | NM_173405 | Amz1           | 231842 | archaelysin family metallopeptidase 1                   | -4.41 | 0.43 | 0.09 |
| A_52_P488011 | NA        | NA             | NA     | NA                                                      | -3.58 | 0.43 | 0.27 |
| A_51_P261737 | NM_021517 | Pdzk1          | 59020  | PDZ domain containing 1                                 | -3.03 | 0.43 | 0.68 |
| A_51_P359432 | AK045942  | NA             | NA     | NA                                                      | -3.33 | 0.43 | 0.40 |
| A_51_P291247 | NM_008646 | Cpamd8         | 17837  | C3 and PZP-like, alpha-2-macroglobulin domain containir | -3.34 | 0.43 | 0.40 |
| A_51_P423963 | NM_031872 | Tas1r3         | 83771  | taste receptor, type 1, member 3                        | -4.99 | 0.43 | 0.00 |
| A_51_P521374 | NM_026341 | Nudt13         | 67725  | nudix (nucleoside diphosphate linked moiety X)-type mol | -4.02 | 0.43 | 0.13 |
| A_51_P140368 | NM_026844 | 2310061C166531 |        | RIKEN cDNA 2310061C15 gene                              | -3.57 | 0.42 | 0.27 |
| A_51_P124126 | NM_019823 | Cyp2d22        | 56448  | cytochrome P450, family 2, subfamily d, polypeptide 22  | -3.85 | 0.42 | 0.16 |
| A_52_P286098 | NA        | NA             | NA     | NA                                                      | -3.10 | 0.42 | 0.60 |
| A_52_P634329 | XM_987710 | NA             | NA     | NA                                                      | -3.98 | 0.42 | 0.12 |
| A_52_P655508 | NA        | NA             | NA     | NA                                                      | -3.73 | 0.42 | 0.21 |
| A_51_P243122 | NM_001029 | Sec14l3        | 380683 | SEC14-like 3 ( <i>S. cerevisiae</i> )                   | -3.79 | 0.42 | 0.17 |
| A_51_P275989 | NM_001037 | RP23-195K      | 622404 | coiled-coil domain containing 107                       | -5.52 | 0.42 | 0.00 |
| A_52_P297251 | NM_009666 | Amelx          | 11704  | amelogenin X chromosome                                 | -3.15 | 0.42 | 0.55 |
| A_51_P459240 | AK002661  | Gstk1          | 76263  | glutathione S-transferase kappa 1                       | -4.00 | 0.42 | 0.12 |
| A_52_P619880 | BC048732  | 26100021172341 |        | RIKEN cDNA 2610002117                                   | -3.02 | 0.42 | 0.70 |

|              |           |           |        |                                                         |       |      |      |
|--------------|-----------|-----------|--------|---------------------------------------------------------|-------|------|------|
| A_51_P159402 | NM_013847 | Gcat      | 26912  | glycine C-acetyltransferase (2-amino-3-ketobutyrate-coe | -4.76 | 0.42 | 0.07 |
| A_52_P669996 | NM_029239 | Prkd3     | 75292  | protein kinase D3                                       | -3.08 | 0.42 | 0.62 |
| A_52_P302345 | NM_133969 | Cyp4v3    | 102294 | cytochrome P450, family 4, subfamily v, polypeptide 3   | -3.04 | 0.42 | 0.67 |
| A_52_P70027  | BC100533  | Cox16     | 66272  | COX16 cytochrome c oxidase assembly homolog (S. cerev   | -3.15 | 0.42 | 0.56 |
| A_52_P466907 | NM_026276 | Aasdhppt  | 67618  | aminoadipate-semialdehyde dehydrogenase-phosphopai      | -3.67 | 0.42 | 0.23 |
| A_51_P451186 | NM_001003 | Rab3ip    | 216363 | RAB3A interacting protein                               | -4.34 | 0.42 | 0.09 |
| A_51_P338600 | NM_025387 | Tmem14c   | 66154  | transmembrane protein 14C                               | -3.88 | 0.42 | 0.16 |
| A_51_P129480 | NM_011124 | Ccl21a    | 18829  | chemokine (C-C motif) ligand 21A                        | -3.52 | 0.42 | 0.28 |
| A_51_P502422 | NM_025790 | Acot13    | 66834  | acyl-CoA thioesterase 13                                | -3.08 | 0.42 | 0.62 |
| A_52_P322006 | NM_025903 | Ifrd2     | 15983  | interferon-related developmental regulator 2            | -4.07 | 0.42 | 0.13 |
| A_51_P130459 | NM_011694 | Vdac1     | 22333  | voltage-dependent anion channel 1                       | -5.46 | 0.42 | 0.00 |
| A_52_P71135  | NM_001079 | Hnrnp3    | 432467 | heterogeneous nuclear ribonucleoprotein H3              | -3.03 | 0.42 | 0.68 |
| A_52_P64783  | AK032172  | Pabpn1    | 54196  | poly(A) binding protein, nuclear 1                      | -3.65 | 0.42 | 0.24 |
| A_52_P680935 | NM_001048 | Ghr       | 14600  | growth hormone receptor                                 | -4.86 | 0.42 | 0.07 |
| A_52_P4271   | AK150666  | Tcp1      | 21454  | t-complex protein 1                                     | -4.46 | 0.42 | 0.05 |
| A_52_P310225 | NM_008298 | Dnaja1    | 15502  | Dnaj (Hsp40) homolog, subfamily A, member 1             | -6.77 | 0.42 | 0.00 |
| A_51_P180994 | BC025200  | 3110073HC | 73201  | RIKEN cDNA 3110073H01 gene                              | -4.64 | 0.42 | 0.06 |
| A_52_P354183 | NM_027436 | Mipep     | 70478  | mitochondrial intermediate peptidase                    | -4.94 | 0.42 | 0.08 |
| A_52_P550325 | NM_010604 | Kcnj16    | 16517  | potassium inwardly-rectifying channel, subfamily J, mem | -4.62 | 0.42 | 0.06 |
| A_52_P622355 | AK008145  | Igl-V1    | 16142  | immunoglobulin lambda chain, variable 1                 | -4.64 | 0.42 | 0.06 |
| A_51_P392577 | NM_173763 | Ccbl2     | 229905 | cysteine conjugate-beta lyase 2                         | -4.72 | 0.42 | 0.06 |
| A_51_P470751 | NM_033354 | Sec16b    | 89867  | SEC16 homolog B (S. cerevisiae)                         | -3.05 | 0.42 | 0.67 |
| A_51_P519984 | NM_172734 | Stk38l    | 232533 | serine/threonine kinase 38 like                         | -2.87 | 0.42 | 0.91 |
| A_52_P16136  | AK017596  | D10Bwg10  | 52902  | DNA segment, Chr 10, Brigham & Women's Genetics 107     | -2.96 | 0.42 | 0.75 |
| A_51_P376258 | NM_008133 | Glud1     | 14661  | glutamate dehydrogenase 1                               | -3.34 | 0.42 | 0.40 |
| A_51_P112817 | NM_024264 | Cyp27a1   | 104086 | cytochrome P450, family 27, subfamily a, polypeptide 1  | -4.77 | 0.42 | 0.07 |
| A_51_P216496 | NM_009364 | Tfpi2     | 21789  | tissue factor pathway inhibitor 2                       | -3.06 | 0.42 | 0.65 |
| A_52_P37593  | NM_015828 | Gne       | 50798  | glucosamine                                             | -2.93 | 0.42 | 0.81 |
| A_52_P567531 | BC055360  | Cntn1     | 12805  | contactin 1                                             | -4.69 | 0.41 | 0.06 |
| A_52_P527775 | NM_010005 | Cyp2d10   | 13101  | cytochrome P450, family 2, subfamily d, polypeptide 10  | -4.12 | 0.41 | 0.10 |
| A_52_P161707 | XM_125901 | Cand1     | 71902  | cullin associated and neddylation disassociated 1       | -4.43 | 0.41 | 0.09 |
| A_51_P154473 | NM_008559 | Mc1r      | 17199  | melanocortin 1 receptor                                 | -2.84 | 0.41 | 0.96 |
| A_51_P244194 | NM_053199 | Cadm3     | 94332  | cell adhesion molecule 3                                | -7.84 | 0.41 | 0.00 |
| A_51_P460332 | NM_007385 | Apoc4     | 11425  | apolipoprotein C-IV                                     | -4.87 | 0.41 | 0.07 |

|              |            |           |        |                                                           |       |      |      |
|--------------|------------|-----------|--------|-----------------------------------------------------------|-------|------|------|
| A_51_P383741 | NM_007554  | Bmp4      | 12159  | bone morphogenetic protein 4                              | -4.93 | 0.41 | 0.08 |
| A_51_P476689 | NM_001038  | Mapt      | 17762  | microtubule-associated protein tau                        | -4.18 | 0.41 | 0.11 |
| A_52_P498167 | NM_138601  | D10Jhu81e | 28295  | DNA segment, Chr 10, Johns Hopkins University 81 expe     | -4.13 | 0.41 | 0.10 |
| A_52_P256182 | NA         | NA        | NA     | NA                                                        | -3.10 | 0.41 | 0.60 |
| A_51_P167097 | AK038845   | Crebl2    | 232430 | cAMP responsive element binding protein-like 2            | -3.42 | 0.41 | 0.34 |
| A_51_P371311 | NM_018861  | Slc1a4    | 55963  | solute carrier family 1 (glutamate/neutral amino acid tra | -3.66 | 0.41 | 0.24 |
| A_51_P116940 | NM_007940  | Ephx2     | 13850  | epoxide hydrolase 2, cytoplasmic                          | -5.44 | 0.41 | 0.00 |
| A_51_P316951 | AK078889   | Wipf3     | 330319 | WAS/WASL interacting protein family, member 3             | -4.76 | 0.41 | 0.07 |
| A_51_P457446 | NM_019546  | Prodh2    | 56189  | proline dehydrogenase (oxidase) 2                         | -4.32 | 0.41 | 0.08 |
| A_51_P121288 | NM_021527  | Mkks      | 59030  | McKusick-Kaufman syndrome protein                         | -4.23 | 0.41 | 0.10 |
| A_51_P213334 | NM_144919  | Hdac11    | 232232 | histone deacetylase 11                                    | -3.30 | 0.41 | 0.43 |
| A_51_P415555 | NM_001042  | Amy2a5    | 109959 | amylase 2a5                                               | -4.44 | 0.41 | 0.10 |
| A_52_P67666  | NM_021370  | Accn5     | 58170  | amiloride-sensitive cation channel 5, intestinal          | -4.68 | 0.41 | 0.06 |
| A_51_P430950 | NM_009041  | Rdx       | 19684  | radixin                                                   | -3.73 | 0.41 | 0.21 |
| A_52_P714654 | AK020221   | 8030488J0 | 77504  | RIKEN cDNA 8030488J09 gene                                | -3.21 | 0.41 | 0.50 |
| A_52_P362106 | AK005018   | NA        | NA     | NA                                                        | -3.41 | 0.41 | 0.35 |
| A_51_P377579 | NM_026601  | Hyi       | 68180  | hydroxypyruvate isomerase homolog (E. coli)               | -5.28 | 0.41 | 0.00 |
| A_52_P438170 | AK084787   | Lifr      | 16880  | leukemia inhibitory factor receptor                       | -3.22 | 0.41 | 0.49 |
| A_52_P77093  | NM_028166  | 1600014C1 | 72244  | RIKEN cDNA 1600014C10 gene                                | -3.46 | 0.41 | 0.33 |
| A_51_P435339 | NM_010149  | Epor      | 13857  | erythropoietin receptor                                   | -4.16 | 0.41 | 0.11 |
| A_52_P93256  | NM_011923  | Angptl2   | 26360  | angiopoietin-like 2                                       | -4.89 | 0.41 | 0.08 |
| A_51_P196925 | NM_009142  | Cx3cl1    | 20312  | chemokine (C-X3-C motif) ligand 1                         | -3.29 | 0.41 | 0.43 |
| A_51_P424054 | XM_0010007 | Btbd2     | 208198 | BTB (POZ) domain containing 2                             | -3.41 | 0.41 | 0.34 |
| A_52_P64376  | NM_026713  | Mogat1    | 68393  | monoacylglycerol O-acyltransferase 1                      | -7.43 | 0.41 | 0.00 |
| A_51_P372473 | NM_016709  | Auh       | 11992  | AU RNA binding protein/enoyl-coenzyme A hydratase         | -6.19 | 0.41 | 0.00 |
| A_52_P340136 | X71478     | Cyp4a10   | 13117  | cytochrome P450, family 4, subfamily a, polypeptide 10    | -3.06 | 0.41 | 0.65 |
| A_51_P375406 | NM_144861  | Rprd1a    | 225283 | regulation of nuclear pre-mRNA domain containing 1A       | -3.53 | 0.41 | 0.29 |
| A_51_P242560 | NM_026844  | 2310061C1 | 66531  | RIKEN cDNA 2310061C15 gene                                | -3.21 | 0.41 | 0.50 |
| A_51_P313337 | AK077261   | 2700089E2 | 381820 | RIKEN cDNA 2700089E24 gene                                | -3.75 | 0.41 | 0.21 |
| A_51_P140347 | NM_172830  | Slc4a9    | 240215 | solute carrier family 4, sodium bicarbonate cotransporter | -2.96 | 0.41 | 0.75 |
| A_51_P391082 | NM_007386  | Aco1      | 11428  | aconitase 1                                               | -3.68 | 0.41 | 0.22 |
| A_51_P460869 | NM_145401  | Prkag2    | 108099 | protein kinase, AMP-activated, gamma 2 non-catalytic su   | -5.25 | 0.41 | 0.00 |
| A_51_P516012 | NM_008745  | Ntrk2     | 18212  | neurotrophic tyrosine kinase, receptor, type 2            | -3.24 | 0.41 | 0.47 |
| A_51_P421804 | NM_013896  | Timm9     | 30056  | translocase of inner mitochondrial membrane 9 homolog     | -3.85 | 0.41 | 0.16 |

|              |           |           |         |                                                                        |       |      |      |
|--------------|-----------|-----------|---------|------------------------------------------------------------------------|-------|------|------|
| A_51_P478952 | NM_133898 | N4bp2l1   | 100637  | NEDD4 binding protein 2-like 1                                         | -3.29 | 0.40 | 0.42 |
| A_51_P249118 | NM_008830 | Abcb4     | 18670   | ATP-binding cassette, sub-family B (MDR/TAP), member 4                 | -3.98 | 0.40 | 0.12 |
| A_51_P338485 | NM_134042 | Aldh6a1   | 104776  | aldehyde dehydrogenase family 6, subfamily A1                          | -5.28 | 0.40 | 0.00 |
| A_51_P361620 | BC019122  | Hist2h2bb | 319189  | histone cluster 2, H2bb                                                | -2.95 | 0.40 | 0.78 |
| A_51_P188795 | NM_025337 | Akr7a5    | 110198  | aldo-keto reductase family 7, member A5 (aflatoxin aldehyde reductase) | -3.71 | 0.40 | 0.20 |
| A_51_P190572 | NM_133906 | Zkscan1   | 74570   | zinc finger with KRAB and SCAN domains 1                               | -3.89 | 0.40 | 0.16 |
| A_51_P122170 | NM_017473 | Rdh7      | 54150   | retinol dehydrogenase 7                                                | -3.73 | 0.40 | 0.21 |
| A_51_P519811 | NM_018751 | Sult1c1   | 20888   | sulfotransferase family, cytosolic, 1C, member 1                       | -3.71 | 0.40 | 0.20 |
| A_51_P419726 | NM_011218 | Ptprs     | 19280   | protein tyrosine phosphatase, receptor type, S                         | -5.21 | 0.40 | 0.00 |
| A_51_P352324 | NM_009197 | Slc16a2   | 20502   | solute carrier family 16 (monocarboxylic acid transporter)             | -3.90 | 0.40 | 0.17 |
| A_51_P164939 | NM_144916 | Tmem150a  | 232086  | transmembrane protein 150A                                             | -2.91 | 0.40 | 0.85 |
| A_52_P24631  | NM_018745 | Azin1     | 54375   | antizyme inhibitor 1                                                   | -5.84 | 0.40 | 0.00 |
| A_52_P655206 | AK050258  | NA        | NA      | NA                                                                     | -3.17 | 0.40 | 0.53 |
| A_52_P302012 | NM_026844 | 2310061C1 | 66531   | RIKEN cDNA 2310061C15 gene                                             | -3.09 | 0.40 | 0.62 |
| A_51_P181312 | NM_026428 | Dcxr      | 67880   | dicarbonyl L-xylulose reductase                                        | -3.93 | 0.40 | 0.14 |
| A_51_P483301 | NM_177256 | Prdx6-rs1 | 320769  | peroxiredoxin 6, related sequence 1                                    | -5.76 | 0.40 | 0.00 |
| A_51_P221031 | NM_172838 | Slc16a12  | 240638  | solute carrier family 16 (monocarboxylic acid transporter)             | -3.00 | 0.40 | 0.70 |
| A_51_P264673 | AK083198  | Prlr      | 19116   | prolactin receptor                                                     | -3.04 | 0.40 | 0.68 |
| A_52_P676573 | NM_007626 | Cbx5      | 12419   | chromobox homolog 5 (Drosophila HP1a)                                  | -3.85 | 0.40 | 0.16 |
| A_52_P78770  | NM_144807 | Chpt1     | 212862  | choline phosphotransferase 1                                           | -3.57 | 0.40 | 0.28 |
| A_52_P119830 | NM_177186 | A530082C1 | 1320541 | RIKEN cDNA A530082C11 gene                                             | -4.10 | 0.40 | 0.10 |
| A_51_P286996 | AF089734  | Fxyd1     | 56188   | FXDY domain-containing ion transport regulator 1                       | -5.04 | 0.40 | 0.00 |
| A_52_P427438 | AK220454  | C2cd2     | 207781  | C2 calcium-dependent domain containing 2                               | -3.31 | 0.40 | 0.42 |
| A_52_P109941 | NM_007575 | Ciita     | 12265   | class II transactivator                                                | -4.54 | 0.40 | 0.05 |
| A_51_P242345 | NM_146193 | Btbd1     | 83962   | BTB (POZ) domain containing 1                                          | -4.86 | 0.40 | 0.07 |
| A_52_P129867 | NM_177244 | Fastkd1   | 320720  | FAST kinase domains 1                                                  | -3.04 | 0.40 | 0.68 |
| A_52_P197627 | NM_009471 | Umps      | 22247   | uridine monophosphate synthetase                                       | -5.04 | 0.40 | 0.00 |
| A_52_P14506  | NA        | NA        | NA      | NA                                                                     | -3.81 | 0.40 | 0.18 |
| A_51_P224164 | NM_011867 | Slc26a4   | 23985   | solute carrier family 26, member 4                                     | -4.29 | 0.40 | 0.08 |
| A_51_P114236 | NA        | NA        | NA      | NA                                                                     | -4.05 | 0.40 | 0.13 |
| A_51_P133562 | NM_007618 | Serpina6  | 12401   | serine (or cysteine) peptidase inhibitor, clade A, member 6            | -3.14 | 0.40 | 0.58 |
| A_52_P118495 | AK035049  | Kdsr      | 70750   | 3-ketodihydrosphingosine reductase                                     | -6.10 | 0.40 | 0.00 |
| A_52_P655663 | NM_010376 | H13       | 14950   | histocompatibility 13                                                  | -4.13 | 0.40 | 0.10 |
| A_51_P443293 | NM_011933 | Decr2     | 26378   | 2-4-dienoyl-Coenzyme A reductase 2, peroxisomal                        | -4.58 | 0.40 | 0.06 |



|               |           |           |        |                                                             |       |      |      |
|---------------|-----------|-----------|--------|-------------------------------------------------------------|-------|------|------|
| A_52_P81783   | BC029786  | Gspt1     | 14852  | G1 to S phase transition 1                                  | -3.60 | 0.40 | 0.26 |
| A_52_P390625  | NM_026572 | Gcsh      | 68133  | glycine cleavage system protein H (aminomethyl carrier)     | -3.98 | 0.40 | 0.12 |
| A_51_P325501  | NM_053250 | Crip3     | 114570 | cysteine-rich protein 3                                     | -4.17 | 0.40 | 0.11 |
| A_51_P163605  | NM_024203 | Fam120b   | 67544  | family with sequence similarity 120, member B               | -5.27 | 0.40 | 0.00 |
| A_51_P519369  | NM_023328 | Agtpbp1   | 67269  | ATP/GTP binding protein 1                                   | -3.98 | 0.40 | 0.12 |
| A_52_P159077  | NM_011734 | Siae      | 22619  | sialic acid acetyltransferase                               | -3.39 | 0.40 | 0.36 |
| A_52_P610923  | NM_139305 | Car9      | 230099 | carbonic anhydrase 9                                        | -3.04 | 0.40 | 0.67 |
| A_51_P425680  | NM_019826 | Ivd       | 56357  | isovaleryl coenzyme A dehydrogenase                         | -5.13 | 0.40 | 0.00 |
| A_51_P488422  | NM_029475 | Adal      | 75894  | adenosine deaminase-like                                    | -3.94 | 0.40 | 0.14 |
| A_52_P223508  | AK081581  | 6720401G1 | 103012 | RIKEN cDNA 6720401G13 gene                                  | -6.91 | 0.40 | 0.00 |
| A_51_P404904  | NM_013770 | Slc25a10  | 27376  | solute carrier family 25 (mitochondrial carrier, dicarboxyl | -3.50 | 0.40 | 0.31 |
| A_51_P253824  | AK008211  | Mgst3     | 66447  | microsomal glutathione S-transferase 3                      | -6.69 | 0.40 | 0.00 |
| A_51_P469724  | NM_053229 | V1rb8     | 113856 | vomer nasal 1 receptor, B8                                  | -3.02 | 0.40 | 0.70 |
| A_52_P393392  | NM_153526 | Insig1    | 231070 | insulin induced gene 1                                      | -2.98 | 0.40 | 0.74 |
| A_51_P262766  | NM_007631 | Ccnd1     | 12443  | cyclin D1                                                   | -3.25 | 0.40 | 0.46 |
| A_51_P226655  | NM_011125 | Pltp      | 18830  | phospholipid transfer protein                               | -2.84 | 0.40 | 0.96 |
| A_51_P313761  | NM_028230 | Shmt2     | 108037 | serine hydroxymethyltransferase 2 (mitochondrial)           | -4.00 | 0.40 | 0.12 |
| A_52_P59681   | NM_008287 | Hrsp12    | 15473  | heat-responsive protein 12                                  | -4.11 | 0.40 | 0.10 |
| A_51_P176352  | NM_013864 | Ndrp2     | 29811  | N-myc downstream regulated gene 2                           | -3.73 | 0.40 | 0.21 |
| A_51_P513991  | AK220494  | Spag4     | 245865 | sperm associated antigen 4                                  | -5.43 | 0.40 | 0.00 |
| A_52_P176573  | NM_011983 | Homer2    | 26557  | homer homolog 2 (Drosophila)                                | -3.41 | 0.40 | 0.35 |
| A_51_P429567  | NM_053106 | Lmod1     | 93689  | leiomodulin 1 (smooth muscle)                               | -3.17 | 0.40 | 0.53 |
| A_51_P112151  | NM_026713 | Mogat1    | 68393  | monoacylglycerol O-acyltransferase 1                        | -6.45 | 0.39 | 0.00 |
| A_51_P318933  | NM_007595 | Camk2b    | 12323  | calcium/calmodulin-dependent protein kinase II, beta        | -3.08 | 0.39 | 0.62 |
| A_52_P685999  | NM_027853 | Mettl7b   | 71664  | methyltransferase like 7B                                   | -2.81 | 0.39 | 1.02 |
| A_52_P1179483 | AK015079  | 4930404H1 | 173815 | RIKEN cDNA 4930404H11 gene                                  | -3.99 | 0.39 | 0.12 |
| A_51_P385086  | NM_009379 | Thpo      | 21832  | thrombopoietin                                              | -2.99 | 0.39 | 0.71 |
| A_51_P450052  | NM_026003 | Smarca2   | 67155  | SWI/SNF related, matrix associated, actin dependent regu    | -3.74 | 0.39 | 0.21 |
| A_52_P454703  | BC033430  | LOC100270 | 1E+08  | hypothetical LOC100270747                                   | -5.27 | 0.39 | 0.00 |
| A_51_P229547  | NM_020252 | Nrxn1     | 18189  | neurexin I                                                  | -5.21 | 0.39 | 0.00 |
| A_51_P214306  | NM_145462 | Haus4     | 219072 | HAUS augmin-like complex, subunit 4                         | -3.82 | 0.39 | 0.18 |
| A_51_P109258  | NM_138686 | Cys1      | 12879  | cystin 1                                                    | -3.09 | 0.39 | 0.62 |
| A_51_P406077  | NM_025363 | Fmc1      | 66117  | formation of mitochondrial complexes 1 homolog (S. cere     | -5.51 | 0.39 | 0.00 |
| A_51_P396917  | NM_026752 | Zfyve21   | 68520  | zinc finger, FYVE domain containing 21                      | -3.42 | 0.39 | 0.34 |

|              |           |                  |        |                                                           |       |      |      |
|--------------|-----------|------------------|--------|-----------------------------------------------------------|-------|------|------|
| A_51_P458873 | NM_019806 | Vapb             | 56491  | vesicle-associated membrane protein, associated protein   | -4.59 | 0.39 | 0.06 |
| A_51_P316173 | NM_145845 | V1ri1            | 252907 | vomeronal 1 receptor, l1                                  | -3.62 | 0.39 | 0.25 |
| A_51_P513311 | NM_009107 | Rxrg             | 20183  | retinoid X receptor gamma                                 | -3.61 | 0.39 | 0.25 |
| A_51_P424954 | AK045415  | B230114P1402735  |        | RIKEN cDNA B230114P17 gene                                | -4.36 | 0.39 | 0.09 |
| A_51_P425254 | NM_145519 | Farp2            | 227377 | FERM, RhoGEF and pleckstrin domain protein 2              | -5.09 | 0.39 | 0.00 |
| A_51_P492366 | NM_007557 | Bmp7             | 12162  | bone morphogenetic protein 7                              | -5.52 | 0.39 | 0.00 |
| A_51_P127469 | NM_024284 | Hagh             | 14651  | hydroxyacyl glutathione hydrolase                         | -3.66 | 0.39 | 0.24 |
| A_51_P242859 | NM_013777 | Akr1c12          | 622402 | aldo-keto reductase family 1, member C12                  | -6.70 | 0.39 | 0.00 |
| A_51_P426276 | NM_133667 | Pdk2             | 18604  | pyruvate dehydrogenase kinase, isoenzyme 2                | -3.35 | 0.39 | 0.39 |
| A_51_P265093 | AK144671  | Aasdhppt         | 67618  | aminoadipate-semialdehyde dehydrogenase-phosphopai        | -4.09 | 0.39 | 0.10 |
| A_52_P562267 | NM_001033 | 9130409I2:619326 |        | RIKEN cDNA 9130409I23 gene                                | -4.87 | 0.39 | 0.07 |
| A_51_P358256 | NM_009803 | Nr1i3            | 12355  | nuclear receptor subfamily 1, group I, member 3           | -3.03 | 0.39 | 0.68 |
| A_51_P392090 | NM_133683 | Tmem19           | 67226  | transmembrane protein 19                                  | -3.12 | 0.39 | 0.59 |
| A_51_P436469 | NM_144821 | AI317395         | 215929 | expressed sequence AI317395                               | -6.41 | 0.39 | 0.00 |
| A_52_P269057 | AK042006  | Elp4             | 77766  | elongation protein 4 homolog (S. cerevisiae)              | -3.69 | 0.39 | 0.22 |
| A_52_P438359 | AK042464  | Dnajc19          | 67713  | Dnaj (Hsp40) homolog, subfamily C, member 19              | -4.37 | 0.39 | 0.09 |
| A_51_P518893 | NM_001002 | Ccin             | 442829 | calicin                                                   | -3.84 | 0.39 | 0.18 |
| A_52_P336142 | NM_011920 | Abcg2            | 26357  | ATP-binding cassette, sub-family G (WHITE), member 2      | -4.46 | 0.39 | 0.05 |
| A_52_P382926 | NM_145973 | Ell3             | 269344 | elongation factor RNA polymerase II-like 3                | -4.55 | 0.39 | 0.05 |
| A_51_P393226 | X52641    | H2-Eb1           | 14969  | histocompatibility 2, class II antigen E beta             | -4.48 | 0.39 | 0.05 |
| A_51_P159711 | NM_053070 | Car7             | 12354  | carbonic anhydrase 7                                      | -4.05 | 0.39 | 0.13 |
| A_52_P203398 | NM_025834 | Proz             | 66901  | protein Z, vitamin K-dependent plasma glycoprotein        | -3.49 | 0.39 | 0.31 |
| A_52_P121486 | NM_080465 | Kcnn2            | 140492 | potassium intermediate/small conductance calcium-activ    | -3.36 | 0.39 | 0.37 |
| A_51_P489720 | NM_153081 | Slc16a11         | 216867 | solute carrier family 16 (monocarboxylic acid transporter | -4.69 | 0.39 | 0.06 |
| A_51_P381321 | NM_199080 | Ddx17            | 67040  | DEAD (Asp-Glu-Ala-Asp) box polypeptide 17                 | -3.96 | 0.39 | 0.15 |
| A_52_P382627 | NM_134111 | Eaf2             | 106389 | ELL associated factor 2                                   | -4.13 | 0.39 | 0.10 |
| A_52_P91265  | NM_013855 | Abca3            | 27410  | ATP-binding cassette, sub-family A (ABC1), member 3       | -3.97 | 0.39 | 0.15 |
| A_51_P503937 | NM_009790 | Calm1            | 12313  | calmodulin 1                                              | -3.19 | 0.39 | 0.52 |
| A_51_P309854 | NM_080465 | Kcnn2            | 140492 | potassium intermediate/small conductance calcium-activ    | -3.27 | 0.39 | 0.44 |
| A_52_P145912 | NM_139300 | Mylk             | 107589 | myosin, light polypeptide kinase                          | -3.48 | 0.39 | 0.32 |
| A_51_P157406 | NM_008963 | Ptgds            | 19215  | prostaglandin D2 synthase (brain)                         | -4.74 | 0.39 | 0.06 |
| A_51_P252545 | NM_026447 | Ppm1m            | 67905  | protein phosphatase 1M                                    | -3.25 | 0.39 | 0.46 |
| A_51_P401176 | NM_175515 | Intu             | 380614 | inturned planar cell polarity effector homolog (Drosophil | -3.69 | 0.39 | 0.22 |
| A_51_P342206 | NM_010002 | Cyp2c38          | 13097  | cytochrome P450, family 2, subfamily c, polypeptide 38    | -3.93 | 0.39 | 0.14 |

|               |            |          |        |                                                        |  |       |      |      |
|---------------|------------|----------|--------|--------------------------------------------------------|--|-------|------|------|
| A_51_P350378  | NA         | NA       | NA     | NA                                                     |  | -2.94 | 0.38 | 0.79 |
| A_52_P654624  | AK161130   | Pisd-ps3 | 66776  | phosphatidylserine decarboxylase, pseudogene 3         |  | -3.06 | 0.38 | 0.65 |
| A_52_P680941  | NM_001048: | Ghr      | 14600  | growth hormone receptor                                |  | -4.24 | 0.38 | 0.08 |
| A_51_P276766  | NM_007416  | Adra1b   | 11548  | adrenergic receptor, alpha 1b                          |  | -3.04 | 0.38 | 0.67 |
| A_51_P111192  | NM_010005  | Cyp2d10  | 13101  | cytochrome P450, family 2, subfamily d, polypeptide 10 |  | -5.13 | 0.38 | 0.00 |
| A_52_P543079  | XM_140800  | NA       | NA     | NA                                                     |  | -4.12 | 0.38 | 0.10 |
| A_51_P293729  | NM_054102  | Ivns1abp | 117198 | influenza virus NS1A binding protein                   |  | -4.55 | 0.38 | 0.05 |
| A_51_P126476  | NM_010863  | Myo1b    | 17912  | myosin IB                                              |  | -4.06 | 0.38 | 0.13 |
| A_52_P282035  | NM_019403  | Rnf5     | 54197  | ring finger protein 5                                  |  | -4.16 | 0.38 | 0.11 |
| A_51_P146655  | NM_029880  | Ptgr2    | 77219  | prostaglandin reductase 2                              |  | -3.80 | 0.38 | 0.17 |
| A_52_P423183  | NM_130864  | Acaa1a   | 113868 | acetyl-Coenzyme A acyltransferase 1A                   |  | -4.75 | 0.38 | 0.07 |
| A_51_P340355  | NM_172310  | Tarsl2   | 272396 | threonyl-tRNA synthetase-like 2                        |  | -3.75 | 0.38 | 0.21 |
| A_52_P175199  | NM_173418  | Lrit2    | 239038 | leucine-rich repeat, immunoglobulin-like and transmemb |  | -4.15 | 0.38 | 0.11 |
| A_51_P170207  | NM_144888  | Mavs     | 228607 | mitochondrial antiviral signaling protein              |  | -3.53 | 0.38 | 0.28 |
| A_51_P422893  | NM_029398  | Tmem14a  | 75712  | transmembrane protein 14A                              |  | -2.98 | 0.38 | 0.72 |
| A_51_P227202  | NA         | NA       | NA     | NA                                                     |  | -3.12 | 0.38 | 0.60 |
| A_51_P320481  | NM_028626  | Mcee     | 73724  | methylmalonyl CoA epimerase                            |  | -3.64 | 0.38 | 0.23 |
| A_52_P575217  | NM_139300  | Mylk     | 107589 | myosin, light polypeptide kinase                       |  | -3.71 | 0.38 | 0.20 |
| A_51_P402583  | NM_008156  | Gpld1    | 14756  | glycosylphosphatidylinositol specific phospholipase D1 |  | -3.98 | 0.38 | 0.12 |
| A_51_P422369  | NM_001013: | Odf3b    | 70113  | outer dense fiber of sperm tails 3B                    |  | -3.86 | 0.38 | 0.16 |
| A_51_P263993  | NM_008280  | Lipc     | 15450  | lipase, hepatic                                        |  | -5.08 | 0.38 | 0.00 |
| A_51_P487818  | NM_017399  | Fabp1    | 14080  | fatty acid binding protein 1, liver                    |  | -4.54 | 0.38 | 0.05 |
| A_52_P222981  | AK033485   | Pgap1    | 241062 | post-GPI attachment to proteins 1                      |  | -4.01 | 0.38 | 0.12 |
| A_51_P332140  | NM_009900  | Clcn2    | 12724  | chloride channel 2                                     |  | -2.99 | 0.38 | 0.71 |
| A_51_P101255  | NM_027896  | Coasy    | 71743  | Coenzyme A synthase                                    |  | -4.03 | 0.38 | 0.13 |
| A_52_P1139679 | AK040552   | NA       | NA     | NA                                                     |  | -3.73 | 0.38 | 0.21 |
| A_52_P161297  | NM_011542  | Tcea3    | 21401  | transcription elongation factor A (SII), 3             |  | -3.20 | 0.38 | 0.52 |
| A_51_P293853  | NM_010271  | Gpd1     | 14555  | glycerol-3-phosphate dehydrogenase 1 (soluble)         |  | -3.61 | 0.38 | 0.25 |
| A_51_P262230  | NM_145466  | A2ld1    | 223267 | AlG2-like domain 1                                     |  | -4.37 | 0.38 | 0.09 |
| A_51_P372418  | NM_026521  | Zfp706   | 68036  | zinc finger protein 706                                |  | -3.47 | 0.38 | 0.33 |
| A_51_P166244  | BC076637   | Osbpl1a  | 64291  | oxysterol binding protein-like 1A                      |  | -3.73 | 0.38 | 0.21 |
| A_51_P356169  | NM_013861  | Tpk1     | 29807  | thiamine pyrophosphokinase                             |  | -3.51 | 0.38 | 0.29 |
| A_52_P356068  | NM_025834  | Proz     | 66901  | protein Z, vitamin K-dependent plasma glycoprotein     |  | -4.04 | 0.38 | 0.13 |
| A_51_P166288  | NM_025371  | Acy1     | 109652 | aminoacylase 1                                         |  | -3.67 | 0.38 | 0.23 |

|               |           |           |        |                                                            |       |      |      |
|---------------|-----------|-----------|--------|------------------------------------------------------------|-------|------|------|
| A_51_P180613  | NM_153783 | Paox      | 212503 | polyamine oxidase (exo-N4-amino)                           | -3.58 | 0.38 | 0.26 |
| A_52_P640221  | NM_001042 | Slc22a18  | 18400  | solute carrier family 22 (organic cation transporter), men | -4.53 | 0.38 | 0.05 |
| A_52_P574720  | NM_010959 | Oit3      | 18302  | oncoprotein induced transcript 3                           | -2.82 | 0.38 | 0.99 |
| A_51_P190740  | NM_007421 | Adssl1    | 11565  | adenylosuccinate synthetase like 1                         | -3.53 | 0.38 | 0.28 |
| A_51_P172917  | NM_007717 | Cmah      | 12763  | cytidine monophospho-N-acetylneuraminic acid hydroxy       | -4.29 | 0.38 | 0.08 |
| A_51_P462422  | NM_008124 | Gjb1      | 14618  | gap junction protein, beta 1                               | -3.70 | 0.38 | 0.22 |
| A_51_P212679  | XM_901651 | NA        | NA     | NA                                                         | -3.00 | 0.38 | 0.71 |
| A_52_P123230  | NM_175438 | Aldh4a1   | 212647 | aldehyde dehydrogenase 4 family, member A1                 | -3.29 | 0.38 | 0.43 |
| A_51_P267063  | NM_144845 | Ugt3a2    | 223337 | UDP glycosyltransferases 3 family, polypeptide A2          | -3.50 | 0.38 | 0.31 |
| A_51_P348804  | NM_019764 | Amotl2    | 56332  | angiomin-like 2                                            | -5.64 | 0.38 | 0.00 |
| A_52_P540855  | NM_007453 | Prdx6     | 11758  | peroxiredoxin 6                                            | -4.77 | 0.38 | 0.07 |
| A_52_P421947  | AK134122  | Mtss1     | 211401 | metastasis suppressor 1                                    | -3.68 | 0.38 | 0.22 |
| A_52_P1064707 | NA        | NA        | NA     | NA                                                         | -3.44 | 0.38 | 0.34 |
| A_52_P236777  | AK029403  | Setd3     | 52690  | SET domain containing 3                                    | -2.82 | 0.38 | 0.99 |
| A_52_P52200   | NA        | NA        | NA     | NA                                                         | -4.11 | 0.37 | 0.10 |
| A_52_P112651  | NM_025828 | Lman2     | 66890  | lectin, mannose-binding 2                                  | -3.43 | 0.37 | 0.34 |
| A_51_P140742  | NM_012043 | Islr      | 26968  | immunoglobulin superfamily containing leucine-rich repe    | -3.94 | 0.37 | 0.14 |
| A_51_P221132  | NM_145443 | L2hgdh    | 217666 | L-2-hydroxyglutarate dehydrogenase                         | -4.31 | 0.37 | 0.08 |
| A_52_P11441   | NM_173781 | Rab6b     | 270192 | RAB6B, member RAS oncogene family                          | -3.68 | 0.37 | 0.22 |
| A_52_P279651  | NM_019778 | Zbtb20    | 56490  | zinc finger and BTB domain containing 20                   | -4.17 | 0.37 | 0.11 |
| A_52_P582251  | AK006209  | 1700021J0 | 72235  | RIKEN cDNA 1700021J08 gene                                 | -3.12 | 0.37 | 0.59 |
| A_51_P414762  | NM_026361 | Pkp4      | 227937 | plakophilin 4                                              | -4.42 | 0.37 | 0.09 |
| A_51_P389905  | NM_013881 | Ulk2      | 29869  | Unc-51 like kinase 2 (C. elegans)                          | -4.50 | 0.37 | 0.05 |
| A_51_P405659  | NM_175342 | Cphx      | 105594 | cytoplasmic polyadenylated homeobox                        | -4.01 | 0.37 | 0.12 |
| A_51_P180617  | NM_153783 | Paox      | 212503 | polyamine oxidase (exo-N4-amino)                           | -3.81 | 0.37 | 0.17 |
| A_51_P176387  | AK077784  | Hook3     | 320191 | hook homolog 3 (Drosophila)                                | -2.95 | 0.37 | 0.76 |
| A_52_P512365  | NM_009894 | Cideb     | 12684  | cell death-inducing DNA fragmentation factor, alpha subu   | -2.90 | 0.37 | 0.85 |
| A_51_P345896  | NM_133880 | Pafah2    | 100163 | platelet-activating factor acetylhydrolase 2               | -3.55 | 0.37 | 0.27 |
| A_51_P510764  | AK040702  | Tmem195   | 319660 | transmembrane protein 195                                  | -4.16 | 0.37 | 0.11 |
| A_52_P597618  | NM_007981 | Acsl1     | 14081  | acyl-CoA synthetase long-chain family member 1             | -3.21 | 0.37 | 0.50 |
| A_51_P435068  | NM_025826 | Acadslb   | 66885  | acyl-Coenzyme A dehydrogenase, short/branched chain        | -3.61 | 0.37 | 0.25 |
| A_51_P126563  | NM_008769 | Otc       | 18416  | ornithine transcarbamylase                                 | -3.41 | 0.37 | 0.35 |
| A_52_P229972  | NM_009202 | Slc22a1   | 20517  | solute carrier family 22 (organic cation transporter), men | -5.41 | 0.37 | 0.00 |
| A_52_P329164  | AK087910  | D130020L0 | 319760 | RIKEN cDNA D130020L05 gene                                 | -3.49 | 0.37 | 0.31 |

|              |           |                  |        |                                                          |       |      |      |
|--------------|-----------|------------------|--------|----------------------------------------------------------|-------|------|------|
| A_51_P204582 | NM_019403 | Rnf5             | 54197  | ring finger protein 5                                    | -5.16 | 0.37 | 0.00 |
| A_51_P276943 | NM_016696 | Gpc1             | 14733  | glypican 1                                               | -3.08 | 0.37 | 0.62 |
| A_52_P327156 | NM_197983 | 0610008F068314   |        | RIKEN cDNA 0610008F07 gene                               | -3.39 | 0.37 | 0.36 |
| A_51_P511680 | NM_001033 | Ttc38            | 239570 | tetratricopeptide repeat domain 38                       | -3.56 | 0.37 | 0.28 |
| A_52_P315766 | NM_010007 | Cyp2j5           | 13109  | cytochrome P450, family 2, subfamily j, polypeptide 5    | -3.97 | 0.37 | 0.15 |
| A_52_P532384 | NA        | NA               | NA     | NA                                                       | -6.73 | 0.37 | 0.00 |
| A_51_P332217 | NM_181418 | Ushbp1           | 234395 | Usher syndrome 1C binding protein 1                      | -3.17 | 0.37 | 0.53 |
| A_51_P284486 | NM_008183 | Gstm2            | 14863  | glutathione S-transferase, mu 2                          | -3.88 | 0.37 | 0.16 |
| A_51_P445683 | NM_133732 | 4931406C070984   |        | RIKEN cDNA 4931406C07 gene                               | -4.30 | 0.37 | 0.08 |
| A_52_P467930 | NA        | NA               | NA     | NA                                                       | -5.02 | 0.37 | 0.00 |
| A_52_P582112 | NM_181821 | Hcfc1r1          | 353502 | host cell factor C1 regulator 1 (XPO1-dependent)         | -3.99 | 0.37 | 0.12 |
| A_52_P634607 | NA        | NA               | NA     | NA                                                       | -3.10 | 0.37 | 0.60 |
| A_51_P132978 | NM_010497 | ldh1             | 15926  | isocitrate dehydrogenase 1 (NADP+), soluble              | -3.44 | 0.37 | 0.35 |
| A_51_P346179 | NM_026690 | Aspdh            | 68352  | aspartate dehydrogenase domain containing                | -3.93 | 0.37 | 0.14 |
| A_51_P180091 | NM_028775 | Cyp2s1           | 74134  | cytochrome P450, family 2, subfamily s, polypeptide 1    | -3.01 | 0.37 | 0.70 |
| A_51_P451458 | NM_174857 | Mamdc2           | 71738  | MAM domain containing 2                                  | -6.51 | 0.37 | 0.00 |
| A_52_P596755 | NM_207161 | BC048355         | 381101 | cDNA sequence BC048355                                   | -4.24 | 0.37 | 0.08 |
| A_52_P70032  | BC100533  | Cox16            | 66272  | COX16 cytochrome c oxidase assembly homolog (S. cerev    | -3.74 | 0.37 | 0.21 |
| A_51_P279100 | NM_008969 | Ptgs1            | 19224  | prostaglandin-endoperoxide synthase 1                    | -2.89 | 0.37 | 0.89 |
| A_51_P256902 | NM_031884 | Abcg5            | 27409  | ATP-binding cassette, sub-family G (WHITE), member 5     | -4.08 | 0.37 | 0.10 |
| A_51_P489192 | NM_015784 | Postn            | 50706  | periostin, osteoblast specific factor                    | -6.28 | 0.37 | 0.00 |
| A_51_P139320 | NM_025273 | Pcbd1            | 13180  | pterin 4 alpha carbinolamine dehydratase/dimerization c  | -3.53 | 0.37 | 0.29 |
| A_52_P598634 | AK045413  | 1190007I07544717 |        | RIKEN cDNA 1190007I07 gene                               | -4.81 | 0.37 | 0.07 |
| A_51_P209782 | NM_001001 | Cyp2c44          | 226143 | cytochrome P450, family 2, subfamily c, polypeptide 44   | -4.51 | 0.37 | 0.05 |
| A_51_P496432 | NM_007981 | Acsl1            | 14081  | acyl-CoA synthetase long-chain family member 1           | -3.70 | 0.37 | 0.22 |
| A_51_P418056 | NM_172769 | Sc5d             | 235293 | sterol-C5-desaturase (fungal ERG3, delta-5-desaturase) h | -2.82 | 0.37 | 0.99 |
| A_52_P339742 | NM_029787 | Cyb5r3           | 109754 | cytochrome b5 reductase 3                                | -3.64 | 0.37 | 0.24 |
| A_51_P338886 | NM_026950 | Ociad2           | 433904 | OCIA domain containing 2                                 | -4.54 | 0.37 | 0.05 |
| A_52_P337427 | NM_027829 | 9030607L171564   |        | RIKEN cDNA 9030607L17 gene                               | -3.67 | 0.37 | 0.23 |
| A_51_P492408 | NM_026784 | Pmvk             | 68603  | phosphomevalonate kinase                                 | -3.01 | 0.37 | 0.70 |
| A_51_P351273 | NM_011542 | Tcea3            | 21401  | transcription elongation factor A (SII), 3               | -3.19 | 0.37 | 0.52 |
| A_51_P491329 | NM_026018 | Pdzk1ip1         | 67182  | PDZK1 interacting protein 1                              | -7.60 | 0.37 | 0.00 |
| A_51_P432511 | NM_145743 | Lace1            | 215951 | lactation elevated 1                                     | -3.89 | 0.36 | 0.16 |
| A_52_P499251 | AK020717  | Cryl1            | 68631  | crystallin, lambda 1                                     | -3.02 | 0.36 | 0.70 |

|              |           |                |        |                                                           |       |      |      |
|--------------|-----------|----------------|--------|-----------------------------------------------------------|-------|------|------|
| A_52_P427449 | NM_018832 | Magix          | 54634  | MAGI family member, X-linked                              | -3.39 | 0.36 | 0.36 |
| A_51_P355629 | NM_008087 | Gas2           | 14453  | growth arrest specific 2                                  | -3.86 | 0.36 | 0.16 |
| A_52_P113350 | NM_212433 | Fbxo3          | 57443  | F-box protein 3                                           | -3.93 | 0.36 | 0.14 |
| A_51_P158638 | NA        | NA             | NA     | NA                                                        | -3.73 | 0.36 | 0.21 |
| A_51_P519048 | NA        | NA             | NA     | NA                                                        | -4.79 | 0.36 | 0.07 |
| A_52_P155708 | NM_011804 | Creg1          | 433375 | cellular repressor of E1A-stimulated genes 1              | -3.01 | 0.36 | 0.70 |
| A_51_P492446 | NM_172401 | 1110057K068832 |        | RIKEN cDNA 1110057K04 gene                                | -6.56 | 0.36 | 0.00 |
| A_51_P311434 | NM_025797 | Cyb5           | 109672 | cytochrome b-5                                            | -5.77 | 0.36 | 0.00 |
| A_51_P487175 | NM_212441 | Acsm3          | 20216  | acyl-CoA synthetase medium-chain family member 3          | -3.46 | 0.36 | 0.33 |
| A_52_P193236 | NM_028056 | 1600002H072016 |        | RIKEN cDNA 1600002H07 gene                                | -2.84 | 0.36 | 0.96 |
| A_52_P981179 | NA        | NA             | NA     | NA                                                        | -3.67 | 0.36 | 0.23 |
| A_51_P193093 | NM_008819 | Pemt           | 18618  | phosphatidylethanolamine N-methyltransferase              | -4.03 | 0.36 | 0.13 |
| A_52_P486260 | NM_054077 | Prelp          | 116847 | proline arginine-rich end leucine-rich repeat             | -3.43 | 0.36 | 0.34 |
| A_51_P334444 | XM_131166 | NA             | NA     | NA                                                        | -2.81 | 0.36 | 1.02 |
| A_51_P475138 | XM_130483 | Duox1          | 99439  | dual oxidase 1                                            | -4.27 | 0.36 | 0.08 |
| A_51_P292550 | AK052715  | Chdh           | 218865 | choline dehydrogenase                                     | -2.94 | 0.36 | 0.79 |
| A_51_P483511 | NM_028785 | Dock8          | 76088  | dedicator of cytokinesis 8                                | -4.16 | 0.36 | 0.11 |
| A_51_P137336 | NM_009864 | Cdh1           | 12550  | cadherin 1                                                | -3.16 | 0.36 | 0.55 |
| A_52_P141141 | NM_029347 | Fggy           | 75578  | FGGY carbohydrate kinase domain containing                | -4.72 | 0.36 | 0.06 |
| A_51_P189442 | NM_011996 | Adh4           | 26876  | alcohol dehydrogenase 4 (class II), pi polypeptide        | -2.81 | 0.36 | 1.02 |
| A_52_P716154 | AV242843  | NA             | NA     | NA                                                        | -3.47 | 0.36 | 0.33 |
| A_51_P367834 | NM_010305 | Gnai1          | 14677  | guanine nucleotide binding protein (G protein), alpha inh | -3.18 | 0.36 | 0.53 |
| A_51_P513611 | NM_146078 | Ubr2           | 224826 | ubiquitin protein ligase E3 component n-recognin 2        | -4.42 | 0.36 | 0.09 |
| A_51_P151433 | NM_026554 | Ncbp2          | 68092  | nuclear cap binding protein subunit 2                     | -4.77 | 0.36 | 0.07 |
| A_52_P110812 | NM_019802 | Ggcx           | 56316  | gamma-glutamyl carboxylase                                | -3.10 | 0.36 | 0.60 |
| A_51_P139030 | NM_023805 | Slc38a3        | 76257  | solute carrier family 38, member 3                        | -3.53 | 0.36 | 0.28 |
| A_51_P194883 | NM_008434 | Kcnq1          | 16535  | potassium voltage-gated channel, subfamily Q, member :    | -4.65 | 0.36 | 0.06 |
| A_51_P165165 | NM_145567 | Hibadh         | 58875  | 3-hydroxyisobutyrate dehydrogenase                        | -7.42 | 0.36 | 0.00 |
| A_51_P148828 | NM_010197 | Fgf1           | 14164  | fibroblast growth factor 1                                | -2.92 | 0.35 | 0.82 |
| A_52_P387237 | NM_011303 | Dhrs3          | 20148  | dehydrogenase/reductase (SDR family) member 3             | -3.35 | 0.35 | 0.38 |
| A_52_P251699 | NM_019546 | Prodh2         | 56189  | proline dehydrogenase (oxidase) 2                         | -5.20 | 0.35 | 0.00 |
| A_51_P219266 | NM_027902 | Tmprss6        | 71753  | transmembrane serine protease 6                           | -4.10 | 0.35 | 0.10 |
| A_52_P624155 | NA        | NA             | NA     | NA                                                        | -4.05 | 0.35 | 0.13 |
| A_51_P161342 | NM_023732 | Abcb6          | 74104  | ATP-binding cassette, sub-family B (MDR/TAP), member :    | -5.63 | 0.35 | 0.00 |

|              |           |           |        |                                                            |       |      |      |
|--------------|-----------|-----------|--------|------------------------------------------------------------|-------|------|------|
| A_52_P210246 | NM_144855 | Cbs       | 12411  | cystathionine beta-synthase                                | -3.44 | 0.35 | 0.35 |
| A_51_P437144 | NM_026556 | Dynll2    | 68097  | dynein light chain LC8-type 2                              | -3.03 | 0.35 | 0.68 |
| A_51_P106538 | NM_030127 | Htra3     | 78558  | HtrA serine peptidase 3                                    | -3.57 | 0.35 | 0.28 |
| A_51_P275623 | NM_015828 | Gne       | 50798  | glucosamine                                                | -3.74 | 0.35 | 0.21 |
| A_52_P183368 | NM_011535 | Tbx3      | 21386  | T-box 3                                                    | -2.89 | 0.35 | 0.89 |
| A_52_P302587 | NM_023543 | Chn2      | 69993  | chimerin (chimaerin) 2                                     | -4.03 | 0.35 | 0.13 |
| A_51_P243323 | AK046666  | 1110020G0 | 68646  | RIKEN cDNA 1110020G09 gene                                 | -4.48 | 0.35 | 0.05 |
| A_52_P306357 | BC042707  | Prok1     | 246691 | prokineticin 1                                             | -3.32 | 0.35 | 0.40 |
| A_51_P293901 | NM_026819 | Dhrs1     | 52585  | dehydrogenase/reductase (SDR family) member 1              | -4.40 | 0.35 | 0.09 |
| A_52_P657825 | AK035670  | Sypl      | 19027  | synaptophysin-like protein                                 | -3.75 | 0.35 | 0.21 |
| A_51_P234864 | NM_178639 | Sfxn5     | 94282  | sideroflexin 5                                             | -3.98 | 0.35 | 0.12 |
| A_51_P246844 | NM_007379 | Abca2     | 11305  | ATP-binding cassette, sub-family A (ABC1), member 2        | -4.38 | 0.35 | 0.09 |
| A_51_P165882 | NM_001042 | Slc22a18  | 18400  | solute carrier family 22 (organic cation transporter), men | -4.58 | 0.35 | 0.06 |
| A_52_P23379  | NM_144804 | Depdc7    | 211896 | DEP domain containing 7                                    | -4.24 | 0.35 | 0.08 |
| A_52_P664044 | CN524910  | NA        | NA     | NA                                                         | -3.45 | 0.35 | 0.33 |
| A_51_P270364 | NM_133823 | Mmaa      | 109136 | methylmalonic aciduria (cobalamin deficiency) type A       | -4.82 | 0.35 | 0.07 |
| A_52_P208471 | NM_145527 | Madd      | 228355 | MAP-kinase activating death domain                         | -3.73 | 0.35 | 0.21 |
| A_52_P293076 | NM_007998 | Fech      | 14151  | ferrochelatase                                             | -4.96 | 0.35 | 0.00 |
| A_52_P234127 | AK031268  | Odz3      | 23965  | odd Oz/ten-m homolog 3 (Drosophila)                        | -3.37 | 0.35 | 0.37 |
| A_51_P148670 | NM_024437 | Nudt7     | 67528  | nudix (nucleoside diphosphate linked moiety X)-type mol    | -6.49 | 0.35 | 0.00 |
| A_51_P273609 | NM_146125 | Itpka     | 228550 | inositol 1,4,5-trisphosphate 3-kinase A                    | -3.55 | 0.35 | 0.29 |
| A_52_P178651 | NA        | NA        | NA     | NA                                                         | -5.85 | 0.35 | 0.00 |
| A_51_P443339 | NM_133960 | Ces6      | 102022 | carboxylesterase 6                                         | -7.45 | 0.35 | 0.00 |
| A_52_P859747 | AK050399  | Gm1381    | 384198 | predicted gene 1381                                        | -3.00 | 0.35 | 0.70 |
| A_51_P337897 | NM_028447 | Prrc1     | 73137  | proline-rich coiled-coil 1                                 | -4.28 | 0.35 | 0.08 |
| A_52_P268269 | AK003909  | Tmem205   | 235043 | transmembrane protein 205                                  | -3.26 | 0.35 | 0.46 |
| A_51_P289239 | NM_007977 | F8        | 14069  | coagulation factor VIII                                    | -4.77 | 0.35 | 0.07 |
| A_52_P278354 | NM_007557 | Bmp7      | 12162  | bone morphogenetic protein 7                               | -5.30 | 0.35 | 0.00 |
| A_51_P307872 | NM_010007 | Cyp2j5    | 13109  | cytochrome P450, family 2, subfamily j, polypeptide 5      | -3.85 | 0.35 | 0.16 |
| A_52_P151320 | NM_025566 | Tnfaip8l1 | 66443  | tumor necrosis factor, alpha-induced protein 8-like 1      | -2.85 | 0.34 | 0.95 |
| A_51_P187697 | NM_028984 | 8430406I0 | 74528  | RIKEN cDNA 8430406I07 gene                                 | -5.34 | 0.34 | 0.00 |
| A_51_P433127 | NM_025654 | Rdm1      | 66599  | RAD52 motif 1                                              | -5.44 | 0.34 | 0.00 |
| A_52_P452599 | NM_133217 | Bco2      | 170752 | beta-carotene oxygenase 2                                  | -3.45 | 0.34 | 0.33 |
| A_51_P133105 | AK018420  | 8430416G1 | 171469 | RIKEN cDNA 8430416G17 gene                                 | -6.45 | 0.34 | 0.00 |

|              |           |           |        |                                                          |       |      |      |
|--------------|-----------|-----------|--------|----------------------------------------------------------|-------|------|------|
| A_51_P180891 | NM_028341 | Ttc39c    | 72747  | tetratricopeptide repeat domain 39C                      | -6.44 | 0.34 | 0.00 |
| A_51_P397375 | NM_144896 | Pet112l   | 229487 | PET112-like (yeast)                                      | -5.15 | 0.34 | 0.00 |
| A_51_P378545 | NM_028030 | Rbpms2    | 71973  | RNA binding protein with multiple splicing 2             | -3.90 | 0.34 | 0.17 |
| A_51_P411271 | NM_010902 | Nfe2l2    | 18024  | nuclear factor, erythroid derived 2, like 2              | -3.91 | 0.34 | 0.14 |
| A_52_P458177 | AB099518  | Mettl7a2  | 393082 | methyltransferase like 7A2                               | -4.83 | 0.34 | 0.07 |
| A_52_P416072 | NM_010145 | Ephx1     | 13849  | epoxide hydrolase 1, microsomal                          | -4.42 | 0.34 | 0.09 |
| A_52_P150903 | AK041002  | Tubb6     | 67951  | tubulin, beta 6                                          | -2.83 | 0.34 | 0.98 |
| A_52_P683136 | NM_030026 | Mccc2     | 78038  | methylcrotonoyl-Coenzyme A carboxylase 2 (beta)          | -3.54 | 0.34 | 0.29 |
| A_51_P190106 | BC033592  | Ralgps2   | 78255  | Ral GEF with PH domain and SH3 binding motif 2           | -3.23 | 0.34 | 0.48 |
| A_51_P473219 | NM_011734 | Siae      | 22619  | sialic acid acetyltransferase                            | -4.02 | 0.34 | 0.13 |
| A_51_P298023 | NM_028094 | Ugt2a3    | 72094  | UDP glucuronosyltransferase 2 family, polypeptide A3     | -5.71 | 0.34 | 0.00 |
| A_51_P352303 | NM_011983 | Homer2    | 26557  | homer homolog 2 (Drosophila)                             | -3.42 | 0.34 | 0.34 |
| A_52_P361462 | NM_174870 | Slc26a1   | 231583 | solute carrier family 26 (sulfate transporter), member 1 | -3.05 | 0.34 | 0.66 |
| A_51_P505493 | NM_134255 | Elov15    | 68801  | ELOVL family member 5, elongation of long chain fatty ac | -3.33 | 0.34 | 0.40 |
| A_51_P304757 | NM_020590 | Gabarapl1 | 57436  | gamma-aminobutyric acid (GABA) A receptor-associated     | -5.43 | 0.34 | 0.00 |
| A_51_P328652 | NM_133348 | Acot7     | 70025  | acyl-CoA thioesterase 7                                  | -6.53 | 0.34 | 0.00 |
| A_51_P424878 | NM_025582 | 2810405K0 | 66469  | RIKEN cDNA 2810405K02 gene                               | -3.42 | 0.34 | 0.34 |
| A_51_P492676 | NM_138665 | Sardh     | 192166 | sarcosine dehydrogenase                                  | -5.18 | 0.34 | 0.00 |
| A_52_P550069 | NM_019826 | Ivd       | 56357  | isovaleryl coenzyme A dehydrogenase                      | -6.13 | 0.34 | 0.00 |
| A_52_P476560 | NM_145853 | Tpcn1     | 252972 | two pore channel 1                                       | -2.91 | 0.34 | 0.85 |
| A_51_P245789 | NM_029620 | Pcolce2   | 76477  | procollagen C-endopeptidase enhancer 2                   | -6.51 | 0.34 | 0.00 |
| A_51_P457397 | AK009140  | Dpp8      | 74388  | dipeptidylpeptidase 8                                    | -4.02 | 0.34 | 0.12 |
| A_51_P170823 | NM_019867 | Ngef      | 53972  | neuronal guanine nucleotide exchange factor              | -3.93 | 0.34 | 0.14 |
| A_51_P195244 | NM_029568 | Mfap4     | 76293  | microfibrillar-associated protein 4                      | -3.23 | 0.34 | 0.49 |
| A_52_P202367 | NM_001013 | Gm10319   | 381806 | predicted gene 10319                                     | -4.36 | 0.34 | 0.09 |
| A_52_P327146 | AK031552  | NA        | NA     | NA                                                       | -3.81 | 0.34 | 0.18 |
| A_51_P150770 | NM_145852 | Ropn1l    | 252967 | ropporin 1-like                                          | -3.92 | 0.34 | 0.14 |
| A_52_P236448 | NM_033217 | Ngfr      | 18053  | nerve growth factor receptor (TNFR superfamily, membe    | -4.42 | 0.34 | 0.09 |
| A_51_P318262 | NM_010403 | Hao1      | 15112  | hydroxyacid oxidase 1, liver                             | -4.31 | 0.34 | 0.08 |
| A_51_P181319 | NM_026428 | Dcxr      | 67880  | dicarbonyl L-xylulose reductase                          | -4.51 | 0.34 | 0.05 |
| A_51_P140541 | BC090963  | Ppm1b     | 19043  | protein phosphatase 1B, magnesium dependent, beta isc    | -2.83 | 0.34 | 0.98 |
| A_52_P277378 | AK081406  | Thap2     | 66816  | THAP domain containing, apoptosis associated protein 2   | -3.37 | 0.34 | 0.37 |
| A_52_P176619 | AK028297  | 2610110G1 | 73242  | RIKEN cDNA 2610110G12 gene                               | -4.29 | 0.34 | 0.08 |
| A_51_P205326 | NM_177743 | Fam198a   | 245050 | family with sequence similarity 198, member A            | -3.36 | 0.34 | 0.39 |



|              |           |            |        |                                                            |       |      |      |
|--------------|-----------|------------|--------|------------------------------------------------------------|-------|------|------|
| A_51_P180061 | NM_028717 | Als2       | 74018  | amyotrophic lateral sclerosis 2 (juvenile) homolog (huma   | -3.09 | 0.34 | 0.60 |
| A_52_P259174 | XM_001005 | NA         | NA     | NA                                                         | -3.34 | 0.34 | 0.40 |
| A_52_P965217 | AI451738  | NA         | NA     | NA                                                         | -5.17 | 0.34 | 0.00 |
| A_51_P359586 | NM_008824 | Pfkfb1     | 18639  | 6-phosphofructo-2-kinase/fructose-2,6-biphosphatase 1      | -3.29 | 0.33 | 0.43 |
| A_51_P403536 | NM_175641 | Ltbp4      | 108075 | latent transforming growth factor beta binding protein 4   | -9.37 | 0.33 | 0.00 |
| A_51_P421418 | NM_008293 | Hsd3b1     | 15492  | hydroxy-delta-5-steroid dehydrogenase, 3 beta- and steri   | -4.64 | 0.33 | 0.06 |
| A_52_P156452 | NM_007717 | Cmah       | 12763  | cytidine monophospho-N-acetylneuraminic acid hydroxy       | -5.18 | 0.33 | 0.00 |
| A_52_P346367 | NM_028074 | Ddx42      | 72047  | DEAD (Asp-Glu-Ala-Asp) box polypeptide 42                  | -3.64 | 0.33 | 0.24 |
| A_52_P64687  | NM_025451 | Camk2n1    | 66259  | calcium/calmodulin-dependent protein kinase II inhibitor   | -3.52 | 0.33 | 0.28 |
| A_52_P136914 | NM_024437 | Nudt7      | 67528  | nudix (nucleoside diphosphate linked moiety X)-type mol    | -5.42 | 0.33 | 0.00 |
| A_51_P418725 | NM_024413 | Plekhf1    | 72287  | pleckstrin homology domain containing, family F (with FY   | -4.32 | 0.33 | 0.08 |
| A_52_P16571  | NM_013761 | Srr        | 27364  | serine racemase                                            | -3.16 | 0.33 | 0.55 |
| A_51_P215077 | NM_025569 | Mgst3      | 66447  | microsomal glutathione S-transferase 3                     | -5.10 | 0.33 | 0.00 |
| A_51_P393654 | NM_175514 | Fam171b    | 241520 | family with sequence similarity 171, member B              | -3.58 | 0.33 | 0.26 |
| A_51_P476492 | XM_893473 | NA         | NA     | NA                                                         | -3.91 | 0.33 | 0.14 |
| A_51_P479311 | NM_010358 | Gstm1      | 14862  | glutathione S-transferase, mu 1                            | -8.59 | 0.33 | 0.00 |
| A_52_P677262 | BC031891  | Serpina4-p | 321018 | serine (or cysteine) peptidase inhibitor, clade A, member  | -3.01 | 0.33 | 0.70 |
| A_52_P489373 | NM_173788 | Npr2       | 230103 | natriuretic peptide receptor 2                             | -4.30 | 0.33 | 0.08 |
| A_51_P282947 | NM_011303 | Dhrs3      | 20148  | dehydrogenase/reductase (SDR family) member 3              | -3.44 | 0.33 | 0.35 |
| A_52_P243516 | NM_201361 | Fam82a1    | 381110 | family with sequence similarity 82, member A1              | -3.24 | 0.33 | 0.48 |
| A_52_P485007 | NM_007379 | Abca2      | 11305  | ATP-binding cassette, sub-family A (ABC1), member 2        | -4.57 | 0.33 | 0.06 |
| A_52_P223194 | NM_008830 | Abcb4      | 18670  | ATP-binding cassette, sub-family B (MDR/TAP), member       | -4.73 | 0.33 | 0.06 |
| A_51_P140576 | NM_001038 | Mapt       | 17762  | microtubule-associated protein tau                         | -3.46 | 0.33 | 0.33 |
| A_51_P420547 | NM_172621 | Clic5      | 224796 | chloride intracellular channel 5                           | -4.11 | 0.33 | 0.10 |
| A_51_P505689 | U92949    | Kifc2      | 16581  | kinesin family member C2                                   | -4.14 | 0.33 | 0.11 |
| A_51_P229536 | NM_020282 | Nqo2       | 18105  | NAD(P)H dehydrogenase, quinone 2                           | -4.11 | 0.33 | 0.10 |
| A_52_P232453 | NM_153591 | Nars2      | 244141 | asparaginyl-tRNA synthetase 2 (mitochondrial)(putative)    | -4.94 | 0.33 | 0.08 |
| A_51_P128595 | AK085036  | Mtx3       | 382793 | metaxin 3                                                  | -3.23 | 0.33 | 0.48 |
| A_52_P424826 | NM_175646 | Txnl4b     | 234723 | thioredoxin-like 4B                                        | -3.93 | 0.33 | 0.14 |
| A_51_P479590 | BC037006  | Wwc1       | 211652 | WW, C2 and coiled-coil domain containing 1                 | -4.06 | 0.33 | 0.13 |
| A_51_P210510 | NM_010097 | Sparcl1    | 13602  | SPARC-like 1                                               | -3.26 | 0.33 | 0.45 |
| A_52_P503071 | NM_138600 | Aldh7a1    | 110695 | aldehyde dehydrogenase family 7, member A1                 | -6.07 | 0.33 | 0.00 |
| A_51_P337412 | NM_146015 | Efemp1     | 216616 | epidermal growth factor-containing fibulin-like extracellu | -6.94 | 0.33 | 0.00 |
| A_51_P279308 | NM_028793 | Acbd5      | 74159  | acyl-Coenzyme A binding domain containing 5                | -4.01 | 0.33 | 0.12 |

|              |           |           |        |                                                               |       |      |      |
|--------------|-----------|-----------|--------|---------------------------------------------------------------|-------|------|------|
| A_51_P337195 | NM_008952 | Pipox     | 19193  | pipecolic acid oxidase                                        | -4.94 | 0.33 | 0.08 |
| A_52_P396436 | NM_010902 | Nfe2l2    | 18024  | nuclear factor, erythroid derived 2, like 2                   | -4.26 | 0.33 | 0.08 |
| A_52_P443578 | NM_010074 | Dpp4      | 13482  | dipeptidylpeptidase 4                                         | -4.58 | 0.33 | 0.06 |
| A_51_P139920 | NM_011844 | Mgll      | 23945  | monoglyceride lipase                                          | -4.55 | 0.33 | 0.05 |
| A_51_P194853 | NM_146013 | Sec14l4   | 103655 | SEC14-like 4 ( <i>S. cerevisiae</i> )                         | -3.70 | 0.33 | 0.22 |
| A_52_P229783 | NM_029880 | Ptgr2     | 77219  | prostaglandin reductase 2                                     | -5.55 | 0.32 | 0.00 |
| A_52_P45124  | U49949    | Mink1     | 50932  | misshapen-like kinase 1 (zebrafish)                           | -3.43 | 0.32 | 0.34 |
| A_51_P200667 | NM_053155 | Clmn      | 94040  | calmin                                                        | -3.40 | 0.32 | 0.35 |
| A_51_P384230 | NM_013731 | Sgk2      | 27219  | serum/glucocorticoid regulated kinase 2                       | -3.61 | 0.32 | 0.25 |
| A_51_P510640 | AK015924  | 4930528F2 | 75178  | RIKEN cDNA 4930528F23 gene                                    | -3.94 | 0.32 | 0.14 |
| A_51_P277745 | NM_013806 | Abcc2     | 12780  | ATP-binding cassette, sub-family C (CFTR/MRP), member         | -4.01 | 0.32 | 0.12 |
| A_52_P168496 | NM_001077 | Slc1a2    | 20511  | solute carrier family 1 (glial high affinity glutamate transp | -6.05 | 0.32 | 0.00 |
| A_51_P224263 | NM_134052 | Adi1      | 104923 | acireductone dioxygenase 1                                    | -3.81 | 0.32 | 0.18 |
| A_51_P251352 | NM_015829 | Slc25a13  | 50799  | solute carrier family 25 (mitochondrial carrier, adenine n    | -4.60 | 0.32 | 0.06 |
| A_51_P249360 | NM_173733 | Suox      | 211389 | sulfite oxidase                                               | -4.40 | 0.32 | 0.09 |
| A_52_P163626 | BC026782  | BC026782  | 545366 | cDNA sequence BC026782                                        | -4.01 | 0.32 | 0.12 |
| A_51_P426739 | NM_182805 | Gpt       | 76282  | glutamic pyruvic transaminase, soluble                        | -3.51 | 0.32 | 0.29 |
| A_51_P520879 | D89677    | Sh3d19    | 27059  | SH3 domain protein D19                                        | -4.15 | 0.32 | 0.11 |
| A_52_P358090 | AK153792  | Sepsecs   | 211006 | Sep (O-phosphoserine) tRNA:Sec (selenocysteine) tRNA s        | -4.18 | 0.32 | 0.11 |
| A_51_P309184 | NM_008993 | Pxmp2     | 19301  | peroxisomal membrane protein 2                                | -4.67 | 0.32 | 0.06 |
| A_51_P289836 | NM_022880 | Slc29a1   | 63959  | solute carrier family 29 (nucleoside transporters), membr     | -2.88 | 0.32 | 0.91 |
| A_52_P129697 | NM_172656 | Stradb    | 227154 | STE20-related kinase adaptor beta                             | -3.86 | 0.32 | 0.16 |
| A_51_P150763 | NM_145852 | Ropn1l    | 252967 | ropporin 1-like                                               | -4.28 | 0.32 | 0.08 |
| A_52_P609778 | NM_011844 | Mgll      | 23945  | monoglyceride lipase                                          | -3.86 | 0.32 | 0.16 |
| A_51_P277088 | NM_008340 | Igfals    | 16005  | insulin-like growth factor binding protein, acid labile sub   | -3.47 | 0.32 | 0.33 |
| A_52_P458279 | NM_011169 | Prlr      | 19116  | prolactin receptor                                            | -5.27 | 0.32 | 0.00 |
| A_51_P402267 | NM_134069 | Slc17a3   | 105355 | solute carrier family 17 (sodium phosphate), member 3         | -3.71 | 0.32 | 0.20 |
| A_52_P559957 | NM_134147 | Macrocl1  | 107227 | MACRO domain containing 1                                     | -5.67 | 0.32 | 0.00 |
| A_52_P411667 | NA        | NA        | NA     | NA                                                            | -4.51 | 0.32 | 0.05 |
| A_51_P121915 | NM_145424 | BC089597  | 216454 | cDNA sequence BC089597                                        | -3.68 | 0.32 | 0.22 |
| A_52_P544410 | BC010667  | Ap3m1     | 55946  | adaptor-related protein complex 3, mu 1 subunit               | -3.78 | 0.32 | 0.17 |
| A_52_P478339 | NM_026527 | Chac2     | 68044  | ChaC, cation transport regulator homolog 2 ( <i>E. coli</i> ) | -3.57 | 0.32 | 0.27 |
| A_51_P452779 | NM_133198 | Pygl      | 110095 | liver glycogen phosphorylase                                  | -4.33 | 0.32 | 0.09 |
| A_52_P63905  | NM_016672 | Ddc       | 13195  | dopa decarboxylase                                            | -3.90 | 0.32 | 0.17 |

|               |           |           |        |                                                            |       |      |      |
|---------------|-----------|-----------|--------|------------------------------------------------------------|-------|------|------|
| A_51_P205385  | NM_009474 | Uox       | 22262  | urate oxidase                                              | -5.80 | 0.31 | 0.00 |
| A_51_P264336  | NM_018795 | Abcc6     | 27421  | ATP-binding cassette, sub-family C (CFTR/MRP), member      | -4.10 | 0.31 | 0.10 |
| A_51_P259296  | NM_008509 | Lpl       | 16956  | lipoprotein lipase                                         | -3.06 | 0.31 | 0.65 |
| A_52_P95517   | NA        | NA        | NA     | NA                                                         | -5.77 | 0.31 | 0.00 |
| A_52_P423174  | NM_146230 | Acaa1b    | 235674 | acetyl-Coenzyme A acyltransferase 1B                       | -5.49 | 0.31 | 0.00 |
| A_52_P1085448 | NA        | NA        | NA     | NA                                                         | -6.53 | 0.31 | 0.00 |
| A_51_P475580  | NM_139297 | Ugp2      | 216558 | UDP-glucose pyrophosphorylase 2                            | -4.04 | 0.31 | 0.13 |
| A_51_P143682  | NM_021346 | Zfp318    | 57908  | zinc finger protein 318                                    | -3.34 | 0.31 | 0.40 |
| A_51_P518940  | NM_173788 | Npr2      | 230103 | natriuretic peptide receptor 2                             | -4.44 | 0.31 | 0.09 |
| A_52_P369776  | BC024893  | Otc       | 18416  | ornithine transcarbamylase                                 | -3.42 | 0.31 | 0.34 |
| A_51_P265219  | NM_175523 | Ppm1k     | 243382 | protein phosphatase 1K (PP2C domain containing)            | -4.37 | 0.31 | 0.09 |
| A_51_P454949  | NM_010359 | Gstm3     | 14864  | glutathione S-transferase, mu 3                            | -7.41 | 0.31 | 0.00 |
| A_51_P502599  | NM_010004 | Cyp2c40   | 13099  | cytochrome P450, family 2, subfamily c, polypeptide 40     | -3.86 | 0.31 | 0.16 |
| A_51_P272147  | NM_033146 | Fam158a   | 85308  | family with sequence similarity 158, member A              | -3.89 | 0.31 | 0.16 |
| A_51_P211171  | NA        | NA        | NA     | NA                                                         | -4.30 | 0.31 | 0.08 |
| A_51_P376347  | NM_013546 | Hebp1     | 15199  | heme binding protein 1                                     | -4.33 | 0.31 | 0.09 |
| A_51_P299805  | NM_027872 | Slc46a3   | 71706  | solute carrier family 46, member 3                         | -4.07 | 0.31 | 0.13 |
| A_52_P639048  | NM_007416 | Adra1b    | 11548  | adrenergic receptor, alpha 1b                              | -3.10 | 0.31 | 0.60 |
| A_51_P283876  | NM_026512 | Bphl      | 68021  | biphenyl hydrolase-like (serine hydrolase, breast epitheli | -4.31 | 0.31 | 0.08 |
| A_52_P643375  | BC075715  | Dmpk      | 13400  | dystrophia myotonica-protein kinase                        | -4.01 | 0.31 | 0.12 |
| A_51_P297900  | NM_009306 | Syt1      | 20979  | synaptotagmin I                                            | -5.79 | 0.31 | 0.00 |
| A_51_P145631  | AK158571  | Svip      | 75744  | small VCP/p97-interacting protein                          | -4.03 | 0.31 | 0.13 |
| A_51_P127215  | AK033655  | Sesn3     | 75747  | sestrin 3                                                  | -3.28 | 0.31 | 0.44 |
| A_51_P424990  | NM_173427 | Klhdc7a   | 242721 | kelch domain containing 7A                                 | -2.97 | 0.31 | 0.74 |
| A_52_P544596  | NM_133732 | 4931406C0 | 70984  | RIKEN cDNA 4931406C07 gene                                 | -3.88 | 0.31 | 0.16 |
| A_52_P468343  | AK146962  | Bdh1      | 71911  | 3-hydroxybutyrate dehydrogenase, type 1                    | -3.16 | 0.31 | 0.55 |
| A_52_P16419   | NM_010271 | Gpd1      | 14555  | glycerol-3-phosphate dehydrogenase 1 (soluble)             | -3.25 | 0.31 | 0.46 |
| A_51_P327141  | NM_009539 | Zap70     | 22637  | zeta-chain (TCR) associated protein kinase                 | -4.22 | 0.31 | 0.12 |
| A_51_P499816  | NM_026701 | Pbld      | 68371  | phenazine biosynthesis-like protein domain containing      | -3.20 | 0.31 | 0.50 |
| A_52_P276776  | NM_028717 | Als2      | 74018  | amyotrophic lateral sclerosis 2 (juvenile) homolog (huma   | -2.95 | 0.31 | 0.76 |
| A_52_P589591  | NM_015810 | Polg2     | 50776  | polymerase (DNA directed), gamma 2, accessory subunit      | -3.70 | 0.31 | 0.22 |
| A_51_P206225  | NM_144940 | Uroc1     | 243537 | urocanase domain containing 1                              | -4.50 | 0.31 | 0.05 |
| A_52_P615138  | NM_025558 | Cyb5b     | 66427  | cytochrome b5 type B                                       | -3.59 | 0.31 | 0.26 |
| A_51_P310850  | AK084512  | Plekha6   | 240753 | pleckstrin homology domain containing, family A membe      | -3.76 | 0.31 | 0.19 |

|              |           |                 |        |                                                           |       |      |      |
|--------------|-----------|-----------------|--------|-----------------------------------------------------------|-------|------|------|
| A_52_P507498 | AK011113  | Plxnc1          | 54712  | plexin C1                                                 | -3.54 | 0.31 | 0.29 |
| A_51_P170959 | AK005011  | Proz            | 66901  | protein Z, vitamin K-dependent plasma glycoprotein        | -4.90 | 0.31 | 0.08 |
| A_52_P676944 | NM_134255 | Elovl5          | 68801  | ELOVL family member 5, elongation of long chain fatty ac  | -3.32 | 0.30 | 0.40 |
| A_51_P496023 | NM_007453 | Prdx6           | 11758  | peroxiredoxin 6                                           | -4.90 | 0.30 | 0.08 |
| A_51_P389421 | NM_023480 | Fahd1           | 68636  | fumarylacetoacetate hydrolase domain containing 1         | -3.69 | 0.30 | 0.22 |
| A_51_P286946 | NM_029609 | Lhpp            | 76429  | phospholysine phosphohistidine inorganic pyrophosphat     | -5.72 | 0.30 | 0.00 |
| A_52_P616229 | NM_026622 | 3110057O1269423 |        | RIKEN cDNA 3110057O12 gene                                | -4.07 | 0.30 | 0.13 |
| A_51_P342200 | XM_134476 | 2310039D275704  |        | RIKEN cDNA 2310039D24 gene                                | -5.04 | 0.30 | 0.00 |
| A_51_P451052 | NM_175013 | Pgm5            | 226041 | phosphoglucomutase 5                                      | -3.44 | 0.30 | 0.35 |
| A_52_P593037 | NM_027976 | Acsl5           | 433256 | acyl-CoA synthetase long-chain family member 5            | -3.70 | 0.30 | 0.22 |
| A_52_P127325 | NM_178885 | AI182371        | 98870  | expressed sequence AI182371                               | -3.33 | 0.30 | 0.40 |
| A_52_P255782 | NM_175316 | Slco2b1         | 101488 | solute carrier organic anion transporter family, member : | -3.36 | 0.30 | 0.39 |
| A_52_P550147 | NM_172463 | Sned1           | 208777 | sushi, nidogen and EGF-like domains 1                     | -3.16 | 0.30 | 0.55 |
| A_51_P113205 | NM_031164 | F13b            | 14060  | coagulation factor XIII, beta subunit                     | -5.23 | 0.30 | 0.00 |
| A_52_P661503 | AK170208  | Depdc6          | 97998  | DEP domain containing 6                                   | -4.16 | 0.30 | 0.11 |
| A_51_P243342 | NM_010347 | Aes             | 14797  | amino-terminal enhancer of split                          | -4.08 | 0.30 | 0.10 |
| A_51_P431470 | NM_026178 | Mmd             | 67468  | monocyte to macrophage differentiation-associated         | -4.89 | 0.30 | 0.08 |
| A_52_P576854 | NM_027950 | Osgin1          | 71839  | oxidative stress induced growth inhibitor 1               | -2.81 | 0.30 | 1.02 |
| A_51_P498882 | NM_010001 | Cyp2c37         | 13096  | cytochrome P450, family 2. subfamily c, polypeptide 37    | -3.20 | 0.30 | 0.52 |
| A_51_P183703 | NA        | NA              | NA     | NA                                                        | -3.58 | 0.30 | 0.27 |
| A_51_P196590 | NM_008212 | Hadh            | 15107  | hydroxyacyl-Coenzyme A dehydrogenase                      | -4.01 | 0.30 | 0.12 |
| A_51_P484254 | NM_144844 | Pcca            | 110821 | propionyl-Coenzyme A carboxylase, alpha polypeptide       | -4.79 | 0.30 | 0.07 |
| A_52_P49391  | AK090296  | Cyp2d22         | 56448  | cytochrome P450, family 2, subfamily d, polypeptide 22    | -4.58 | 0.30 | 0.06 |
| A_51_P383774 | NM_010314 | Gngt1           | 14699  | guanine nucleotide binding protein (G protein), gamma t   | -3.94 | 0.30 | 0.14 |
| A_51_P463452 | NM_007981 | Acsl1           | 14081  | acyl-CoA synthetase long-chain family member 1            | -3.10 | 0.30 | 0.60 |
| A_52_P617636 | NM_010636 | Klf12           | 16597  | Kruppel-like factor 12                                    | -4.07 | 0.30 | 0.13 |
| A_51_P327585 | NM_026764 | Gstm4           | 14865  | glutathione S-transferase, mu 4                           | -4.05 | 0.30 | 0.13 |
| A_52_P257812 | NM_008509 | Lpl             | 16956  | lipoprotein lipase                                        | -2.99 | 0.30 | 0.71 |
| A_51_P292582 | NM_019423 | Elovl2          | 54326  | elongation of very long chain fatty acids (FEN1/Elo2, SUR | -3.56 | 0.30 | 0.28 |
| A_52_P571419 | NA        | NA              | NA     | NA                                                        | -3.27 | 0.30 | 0.45 |
| A_51_P302566 | NM_172778 | Maob            | 109731 | monoamine oxidase B                                       | -4.82 | 0.30 | 0.07 |
| A_51_P406583 | NM_181072 | Myo1e           | 71602  | myosin IE                                                 | -4.36 | 0.30 | 0.09 |
| A_52_P35340  | NM_133894 | Ugt2b38         | 100559 | UDP glucuronosyltransferase 2 family, polypeptide B38     | -4.02 | 0.30 | 0.12 |
| A_51_P257613 | NM_178882 | D2hgdh          | 98314  | D-2-hydroxyglutarate dehydrogenase                        | -4.73 | 0.30 | 0.06 |

|              |           |           |        |                                                              |       |      |      |
|--------------|-----------|-----------|--------|--------------------------------------------------------------|-------|------|------|
| A_51_P394115 | NM_023383 | Aadac     | 67758  | arylacetamide deacetylase (esterase)                         | -5.97 | 0.30 | 0.00 |
| A_51_P267653 | NM_153157 | Olfm3     | 229759 | olfactomedin 3                                               | -4.46 | 0.30 | 0.05 |
| A_51_P113475 | NM_008796 | Pctp      | 18559  | phosphatidylcholine transfer protein                         | -3.74 | 0.30 | 0.21 |
| A_51_P466673 | NM_146083 | Sfrs7     | 225027 | splicing factor, arginine/serine-rich 7                      | -7.23 | 0.29 | 0.00 |
| A_51_P163106 | NM_175177 | Bdh1      | 71911  | 3-hydroxybutyrate dehydrogenase, type 1                      | -4.59 | 0.29 | 0.06 |
| A_52_P540219 | NM_011594 | Timp2     | 21858  | tissue inhibitor of metalloproteinase 2                      | -3.17 | 0.29 | 0.55 |
| A_51_P158120 | NM_178640 | B3galnt2  | 97884  | UDP-GalNAc:betaGlcNAc beta 1,3-galactosaminyltransferase 2   | -4.25 | 0.29 | 0.08 |
| A_51_P457244 | NM_021365 | Xlr4b     | 27083  | X-linked lymphocyte-regulated 4B                             | -3.06 | 0.29 | 0.65 |
| A_51_P120137 | NM_201361 | Fam82a1   | 381110 | family with sequence similarity 82, member A1                | -3.38 | 0.29 | 0.36 |
| A_52_P479262 | XM_897036 | Col6a3    | 12835  | collagen, type VI, alpha 3                                   | -3.96 | 0.29 | 0.15 |
| A_52_P141136 | AK009249  | Fggy      | 75578  | FGGY carbohydrate kinase domain containing                   | -5.58 | 0.29 | 0.00 |
| A_52_P480088 | NM_025685 | Col27a1   | 373864 | collagen, type XXVII, alpha 1                                | -6.15 | 0.29 | 0.00 |
| A_51_P510418 | NM_028270 | Aldh1b1   | 72535  | aldehyde dehydrogenase 1 family, member B1                   | -3.82 | 0.29 | 0.18 |
| A_51_P210293 | NM_172952 | Gphn      | 268566 | gephyrin                                                     | -4.08 | 0.29 | 0.10 |
| A_51_P512072 | NM_008525 | Alad      | 17025  | aminolevulinate, delta-, dehydratase                         | -4.08 | 0.29 | 0.10 |
| A_52_P92213  | AK089867  | 2210404J1 | 381062 | RIKEN cDNA 2210404J11 gene                                   | -3.49 | 0.29 | 0.31 |
| A_51_P239737 | NM_011082 | Pigr      | 18703  | polymeric immunoglobulin receptor                            | -4.37 | 0.29 | 0.09 |
| A_52_P120055 | NM_009171 | Shmt1     | 20425  | serine hydroxymethyltransferase 1 (soluble)                  | -4.22 | 0.29 | 0.10 |
| A_51_P211403 | NM_008101 | Gcgr      | 14527  | glucagon receptor                                            | -4.38 | 0.29 | 0.09 |
| A_51_P400463 | XM_980293 | NA        | NA     | NA                                                           | -5.36 | 0.29 | 0.00 |
| A_51_P336952 | NM_030004 | Cryl1     | 68631  | crystallin, lambda 1                                         | -6.97 | 0.29 | 0.00 |
| A_51_P342926 | NM_012050 | Omd       | 27047  | osteomodulin                                                 | -6.23 | 0.29 | 0.00 |
| A_51_P198675 | NM_138951 | Ttc36     | 192653 | tetratricopeptide repeat domain 36                           | -4.63 | 0.29 | 0.06 |
| A_52_P200121 | NM_010004 | Cyp2c40   | 13099  | cytochrome P450, family 2, subfamily c, polypeptide 40       | -3.78 | 0.29 | 0.17 |
| A_51_P186601 | M29546    | Me1       | 17436  | malic enzyme 1, NADP(+)-dependent, cytosolic                 | -3.02 | 0.29 | 0.70 |
| A_51_P153170 | NM_029787 | Cyb5r3    | 109754 | cytochrome b5 reductase 3                                    | -4.67 | 0.29 | 0.06 |
| A_51_P380178 | NM_008321 | Id3       | 15903  | inhibitor of DNA binding 3                                   | -3.84 | 0.29 | 0.18 |
| A_52_P64356  | NM_010097 | Sparcl1   | 13602  | SPARC-like 1                                                 | -2.86 | 0.29 | 0.93 |
| A_51_P200477 | NM_008300 | Hspa4     | 15525  | heat shock protein 4                                         | -3.92 | 0.29 | 0.14 |
| A_51_P114005 | NM_026672 | Gstm7     | 68312  | glutathione S-transferase, mu 7                              | -3.72 | 0.29 | 0.20 |
| A_52_P627761 | NM_023154 | Ethe1     | 66071  | ethylmalonic encephalopathy 1                                | -3.91 | 0.29 | 0.14 |
| A_51_P305843 | NM_025844 | Chordc1   | 66917  | cysteine and histidine-rich domain (CHORD)-containing, zeta  | -5.26 | 0.29 | 0.00 |
| A_51_P164539 | NM_033474 | Arvcf     | 11877  | armadillo repeat gene deleted in velo-cardio-facial syndrome | -3.68 | 0.29 | 0.22 |
| A_51_P353895 | NM_026935 | Sult1c2   | 69083  | sulfotransferase family, cytosolic, 1C, member 2             | -5.44 | 0.29 | 0.00 |

|              |           |         |        |                                                                  |        |      |      |
|--------------|-----------|---------|--------|------------------------------------------------------------------|--------|------|------|
| A_51_P291749 | NM_023523 | Pecr    | 111175 | peroxisomal trans-2-enoyl-CoA reductase                          | -4.18  | 0.28 | 0.11 |
| A_51_P214209 | NM_026282 | Spc24   | 67629  | SPC24, NDC80 kinetochore complex component, homolo               | -4.07  | 0.28 | 0.10 |
| A_51_P232399 | NM_027857 | Acy3    | 71670  | aspartoacylase (aminoacylase) 3                                  | -4.20  | 0.28 | 0.11 |
| A_51_P384936 | NM_027442 | Ddo     | 70503  | D-aspartate oxidase                                              | -4.51  | 0.28 | 0.05 |
| A_52_P193941 | NM_027987 | Cd300lg | 52685  | CD300 antigen like family member G                               | -3.84  | 0.28 | 0.18 |
| A_52_P319927 | XM_140800 | NA      | NA     | NA                                                               | -4.87  | 0.28 | 0.07 |
| A_52_P488427 | NM_144520 | Sec14l2 | 67815  | SEC14-like 2 ( <i>S. cerevisiae</i> )                            | -3.38  | 0.28 | 0.36 |
| A_52_P223704 | NM_010173 | Faah    | 14073  | fatty acid amide hydrolase                                       | -3.76  | 0.28 | 0.19 |
| A_51_P514405 | NM_019741 | Slc2a5  | 56485  | solute carrier family 2 (facilitated glucose transporter), m     | -3.00  | 0.28 | 0.70 |
| A_52_P298002 | NM_008102 | Gch1    | 14528  | GTP cyclohydrolase 1                                             | -7.27  | 0.28 | 0.00 |
| A_51_P120448 | NM_025855 | Echdc1  | 52665  | enoyl Coenzyme A hydratase domain containing 1                   | -4.75  | 0.28 | 0.07 |
| A_51_P151628 | NM_030717 | Lactb   | 80907  | lactamase, beta                                                  | -5.28  | 0.28 | 0.00 |
| A_51_P467110 | NM_010074 | Dpp4    | 13482  | dipeptidylpeptidase 4                                            | -5.53  | 0.28 | 0.00 |
| A_52_P508920 | NM_147218 | Abca6   | 76184  | ATP-binding cassette, sub-family A (ABC1), member 6              | -5.02  | 0.28 | 0.00 |
| A_52_P585104 | NM_010219 | Fkbp4   | 14228  | FK506 binding protein 4                                          | -3.58  | 0.28 | 0.26 |
| A_51_P497768 | XM_130488 | NA      | NA     | NA                                                               | -3.14  | 0.28 | 0.58 |
| A_51_P434928 | NM_146287 | Olf114  | 258284 | olfactory receptor 114                                           | -4.68  | 0.28 | 0.06 |
| A_51_P319289 | NM_027301 | Sdr9c7  | 70061  | 4short chain dehydrogenase/reductase family 9C, memb             | -3.01  | 0.28 | 0.70 |
| A_52_P94495  | AK050059  | Prkd3   | 75292  | protein kinase D3                                                | -3.93  | 0.28 | 0.14 |
| A_51_P290626 | NM_178747 | Gulo    | 268756 | gulonolactone (L-) oxidase                                       | -5.23  | 0.28 | 0.00 |
| A_52_P300344 | AK128969  | Pm20d1  | 212933 | peptidase M20 domain containing 1                                | -4.85  | 0.28 | 0.07 |
| A_52_P605266 | NM_011211 | Ptprd   | 19266  | protein tyrosine phosphatase, receptor type, D                   | -4.53  | 0.28 | 0.05 |
| A_51_P175303 | NM_019725 | Tle2    | 21886  | transducin-like enhancer of split 2, homolog of <i>Drosophil</i> | -3.46  | 0.28 | 0.33 |
| A_51_P482844 | AK004291  | Pycrl   | 66194  | pyrroline-5-carboxylate reductase-like                           | -3.69  | 0.28 | 0.22 |
| A_51_P369998 | NM_172951 | Sntg2   | 268534 | syntrophin, gamma 2                                              | -4.49  | 0.28 | 0.05 |
| A_51_P252000 | NM_144796 | Susd4   | 96935  | sushi domain containing 4                                        | -4.90  | 0.28 | 0.08 |
| A_51_P398525 | NM_022014 | Fn3k    | 63828  | fructosamine 3 kinase                                            | -3.92  | 0.28 | 0.14 |
| A_52_P267505 | NM_013851 | Abca8b  | 27404  | ATP-binding cassette, sub-family A (ABC1), member 8b             | -4.26  | 0.28 | 0.08 |
| A_51_P213030 | NM_134147 | Macro1  | 107227 | MACRO domain containing 1                                        | -6.37  | 0.28 | 0.00 |
| A_51_P516006 | AK018789  | Ntrk2   | 18212  | neurotrophic tyrosine kinase, receptor, type 2                   | -2.85  | 0.28 | 0.95 |
| A_52_P121342 | NM_020252 | Nrxn1   | 18189  | neurexin I                                                       | -10.00 | 0.28 | 0.00 |
| A_52_P481182 | NM_023377 | Stard5  | 170460 | StAR-related lipid transfer (START) domain containing 5          | -4.51  | 0.28 | 0.05 |
| A_51_P372141 | NM_001039 | Pnkd    | 56695  | paroxysmal nonkinesinogenic dyskinesia                           | -2.96  | 0.28 | 0.76 |
| A_52_P501007 | NM_009467 | Ugt2b5  | 22238  | UDP glucuronosyltransferase 2 family, polypeptide B5             | -4.19  | 0.28 | 0.11 |

|              |           |           |        |                                                               |       |      |      |
|--------------|-----------|-----------|--------|---------------------------------------------------------------|-------|------|------|
| A_51_P103706 | NM_007815 | Cyp2c29   | 13095  | cytochrome P450, family 2, subfamily c, polypeptide 29        | -4.52 | 0.28 | 0.05 |
| A_52_P259817 | NM_029692 | Upp2      | 76654  | uridine phosphorylase 2                                       | -3.13 | 0.27 | 0.59 |
| A_52_P179925 | NM_026180 | Abcg8     | 67470  | ATP-binding cassette, sub-family G (WHITE), member 8          | -4.00 | 0.27 | 0.12 |
| A_51_P224013 | NM_009387 | Tk1       | 21877  | thymidine kinase 1                                            | -3.82 | 0.27 | 0.18 |
| A_51_P504214 | NM_018832 | Magix     | 54634  | MAGI family member, X-linked                                  | -3.76 | 0.27 | 0.19 |
| A_51_P446570 | NM_130452 | Bbox1     | 170442 | butyrobetaine (gamma), 2-oxoglutarate dioxygenase 1 (g        | -4.88 | 0.27 | 0.07 |
| A_51_P477875 | NM_011393 | Slc1a2    | 20511  | solute carrier family 1 (glial high affinity glutamate transp | -4.79 | 0.27 | 0.07 |
| A_51_P169087 | NM_001033 | Gls2      | 216456 | glutaminase 2 (liver, mitochondrial)                          | -4.06 | 0.27 | 0.13 |
| A_51_P496045 | AK020592  | 9530039L2 | 78422  | RIKEN cDNA 9530039L23 gene                                    | -2.88 | 0.27 | 0.89 |
| A_52_P626020 | XM_976628 | EG665393  | 665393 | predicted gene, EG665393                                      | -4.03 | 0.27 | 0.13 |
| A_51_P268641 | AY566863  | A1cf      | 69865  | APOBEC1 complementation factor                                | -3.64 | 0.27 | 0.23 |
| A_51_P213691 | NM_011324 | Scnn1a    | 20276  | sodium channel, nonvoltage-gated 1 alpha                      | -5.04 | 0.27 | 0.00 |
| A_51_P428555 | NM_007409 | Adh1      | 11522  | alcohol dehydrogenase 1 (class I)                             | -3.98 | 0.27 | 0.12 |
| A_52_P561416 | NM_176952 | 6430573F1 | 319582 | RIKEN cDNA 6430573F11 gene                                    | -3.53 | 0.27 | 0.29 |
| A_52_P571290 | NM_026988 | Ptms      | 69202  | parathymosin                                                  | -5.01 | 0.27 | 0.00 |
| A_52_P284889 | NM_008860 | Prkcz     | 18762  | protein kinase C, zeta                                        | -3.30 | 0.27 | 0.43 |
| A_51_P410361 | NM_001039 | Lin7a     | 108030 | lin-7 homolog A (C. elegans)                                  | -3.72 | 0.27 | 0.21 |
| A_51_P302856 | NM_053215 | Ugt2b37   | 112417 | UDP glucuronosyltransferase 2 family, polypeptide B37         | -4.23 | 0.27 | 0.08 |
| A_51_P332141 | NM_009900 | Clcn2     | 12724  | chloride channel 2                                            | -4.54 | 0.27 | 0.05 |
| A_51_P209597 | AK143987  | Afm       | 280662 | afamin                                                        | -3.52 | 0.27 | 0.28 |
| A_52_P578922 | AK159899  | Hmgcr     | 15357  | 3-hydroxy-3-methylglutaryl-Coenzyme A reductase               | -3.77 | 0.27 | 0.19 |
| A_51_P276802 | NM_054080 | Akr1c20   | 116852 | aldo-keto reductase family 1, member C20                      | -5.03 | 0.27 | 0.00 |
| A_51_P206153 | D13903    | Ptprd     | 19266  | protein tyrosine phosphatase, receptor type, D                | -4.37 | 0.27 | 0.09 |
| A_52_P590535 | NM_007992 | Fbln2     | 14115  | fibulin 2                                                     | -5.03 | 0.27 | 0.00 |
| A_52_P629895 | NM_007409 | Adh1      | 11522  | alcohol dehydrogenase 1 (class I)                             | -3.86 | 0.27 | 0.16 |
| A_52_P253567 | NM_013821 | Hsd3b6    | 15497  | hydroxy-delta-5-steroid dehydrogenase, 3 beta- and steri      | -3.85 | 0.27 | 0.16 |
| A_52_P35581  | NA        | NA        | NA     | NA                                                            | -4.54 | 0.27 | 0.05 |
| A_52_P372062 | NM_133695 | NA        | NA     | NA                                                            | -5.27 | 0.27 | 0.00 |
| A_52_P48762  | NM_001039 | Lin7a     | 108030 | lin-7 homolog A (C. elegans)                                  | -5.07 | 0.27 | 0.00 |
| A_52_P501167 | XM_620568 | NA        | NA     | NA                                                            | -5.14 | 0.27 | 0.00 |
| A_51_P364609 | NM_019699 | Fads2     | 56473  | fatty acid desaturase 2                                       | -5.44 | 0.27 | 0.00 |
| A_51_P194149 | NM_013697 | Ttr       | 22139  | transthyretin                                                 | -3.76 | 0.27 | 0.19 |
| A_51_P192089 | NM_028228 | 2610028AC | 72400  | RIKEN cDNA 2610028A01 gene                                    | -3.69 | 0.27 | 0.22 |
| A_51_P235604 | NM_023160 | Cml1      | 66116  | camello-like 1                                                | -5.01 | 0.27 | 0.00 |

|              |           |           |        |                                                           |       |      |      |
|--------------|-----------|-----------|--------|-----------------------------------------------------------|-------|------|------|
| A_52_P136709 | NM_008796 | Pctp      | 18559  | phosphatidylcholine transfer protein                      | -3.47 | 0.27 | 0.32 |
| A_51_P124285 | NM_027280 | Nkd1      | 93960  | naked cuticle 1 homolog (Drosophila)                      | -3.88 | 0.27 | 0.16 |
| A_52_P361165 | NM_007494 | Ass1      | 11898  | argininosuccinate synthetase 1                            | -4.43 | 0.27 | 0.09 |
| A_51_P384515 | AK082385  | Ido2      | 209176 | indoleamine 2,3-dioxygenase 2                             | -3.45 | 0.27 | 0.33 |
| A_51_P484869 | NM_010255 | Gamt      | 14431  | guanidinoacetate methyltransferase                        | -5.87 | 0.26 | 0.00 |
| A_51_P234692 | AK028745  | Neat1     | 66961  | nuclear paraspeckle assembly transcript 1 (non-protein c  | -3.63 | 0.26 | 0.25 |
| A_51_P246345 | NM_022879 | Myl7      | 17898  | myosin, light polypeptide 7, regulatory                   | -3.01 | 0.26 | 0.70 |
| A_51_P102438 | NM_001029 | Ugt2b36   | 231396 | UDP glucuronosyltransferase 2 family, polypeptide B36     | -4.73 | 0.26 | 0.06 |
| A_52_P353417 | NM_010299 | Gm2a      | 14667  | GM2 ganglioside activator protein                         | -4.66 | 0.26 | 0.06 |
| A_52_P481097 | AK086528  | Lztf1     | 93730  | leucine zipper transcription factor-like 1                | -3.23 | 0.26 | 0.48 |
| A_51_P510037 | NM_053184 | Ugt2a1    | 94215  | UDP glucuronosyltransferase 2 family, polypeptide A1      | -5.05 | 0.26 | 0.00 |
| A_51_P217906 | NM_007799 | Ctse      | 13034  | cathepsin E                                               | -3.71 | 0.26 | 0.22 |
| A_52_P118560 | NM_027552 | Kynu      | 70789  | kynureninase (L-kynurenine hydrolase)                     | -4.40 | 0.26 | 0.09 |
| A_51_P502838 | AK039198  | Ube2h     | 22214  | ubiquitin-conjugating enzyme E2H                          | -4.37 | 0.26 | 0.09 |
| A_51_P214516 | NM_008698 | Nipsnap1  | 18082  | 4-nitrophenylphosphatase domain and non-neuronal SN       | -4.71 | 0.26 | 0.06 |
| A_52_P257426 | NM_133191 | Eps8l2    | 98845  | EPS8-like 2                                               | -5.55 | 0.26 | 0.00 |
| A_51_P185175 | NM_010219 | Fkbp4     | 14228  | FK506 binding protein 4                                   | -3.89 | 0.26 | 0.16 |
| A_51_P471177 | NM_009291 | Stra6     | 20897  | stimulated by retinoic acid gene 6                        | -3.49 | 0.26 | 0.31 |
| A_51_P287198 | NM_033373 | Krt23     | 94179  | keratin 23                                                | -6.06 | 0.26 | 0.00 |
| A_52_P537827 | AK142559  | Wdr72     | 546144 | WD repeat domain 72                                       | -2.86 | 0.26 | 0.93 |
| A_51_P338713 | M31690    | Ass1      | 11898  | argininosuccinate synthetase 1                            | -4.37 | 0.26 | 0.09 |
| A_51_P215438 | NM_011172 | Prodh     | 19125  | proline dehydrogenase                                     | -4.32 | 0.26 | 0.08 |
| A_52_P680827 | NM_172961 | Abat      | 268860 | 4-aminobutyrate aminotransferase                          | -4.23 | 0.26 | 0.08 |
| A_51_P408989 | NM_026038 | 2810055F1 | 67217  | RIKEN cDNA 2810055F11 gene                                | -4.39 | 0.26 | 0.09 |
| A_52_P399204 | AK090143  | Amdhd1    | 71761  | amidohydrolase domain containing 1                        | -4.23 | 0.26 | 0.08 |
| A_51_P391631 | NM_145364 | Akr1d1    | 208665 | aldo-keto reductase family 1, member D1                   | -3.32 | 0.26 | 0.40 |
| A_51_P481679 | NM_013913 | Angptl3   | 30924  | angiopoietin-like 3                                       | -3.60 | 0.26 | 0.26 |
| A_52_P317653 | NM_009799 | Car1      | 12346  | carbonic anhydrase 1                                      | -7.07 | 0.26 | 0.00 |
| A_51_P114002 | AK002213  | Gstm7     | 68312  | glutathione S-transferase, mu 7                           | -4.05 | 0.26 | 0.13 |
| A_51_P446825 | NM_176952 | 6430573F1 | 319582 | RIKEN cDNA 6430573F11 gene                                | -3.56 | 0.26 | 0.27 |
| A_51_P220062 | NM_008609 | Mmp15     | 17388  | matrix metalloproteinase 15                               | -3.68 | 0.26 | 0.22 |
| A_51_P468140 | NM_008223 | Serpind1  | 15160  | serine (or cysteine) peptidase inhibitor, clade D, member | -3.95 | 0.26 | 0.14 |
| A_51_P458781 | NM_008278 | Hpgd      | 15446  | hydroxyprostaglandin dehydrogenase 15 (NAD)               | -5.96 | 0.26 | 0.00 |
| A_51_P212682 | NM_027290 | Mcm10     | 70024  | minichromosome maintenance deficient 10 (S. cerevisiae)   | -3.83 | 0.25 | 0.18 |



|              |            |           |        |                                                          |       |      |      |
|--------------|------------|-----------|--------|----------------------------------------------------------|-------|------|------|
| A_51_P157083 | NM_008086  | Gas1      | 14451  | growth arrest specific 1                                 | -3.27 | 0.25 | 0.45 |
| A_51_P503625 | NM_001077: | Gsta3     | 14859  | glutathione S-transferase, alpha 3                       | -4.49 | 0.25 | 0.05 |
| A_51_P312348 | AK002434   | Krt7      | 110310 | keratin 7                                                | -2.88 | 0.25 | 0.91 |
| A_52_P103929 | NM_009306  | Syt1      | 20979  | synaptotagmin I                                          | -5.14 | 0.25 | 0.00 |
| A_52_P92037  | NM_009474  | Uox       | 22262  | urate oxidase                                            | -4.42 | 0.25 | 0.09 |
| A_52_P195809 | NM_027208  | Bdh2      | 69772  | 3-hydroxybutyrate dehydrogenase, type 2                  | -5.24 | 0.25 | 0.00 |
| A_52_P120510 | NM_178747  | Gulo      | 268756 | gulonolactone (L-) oxidase                               | -4.75 | 0.25 | 0.07 |
| A_51_P403578 | AK007907   | 1810059H2 | 69820  | RIKEN cDNA 1810059H22 gene                               | -3.38 | 0.25 | 0.36 |
| A_51_P196862 | AK090143   | Amdhd1    | 71761  | amidohydrolase domain containing 1                       | -4.38 | 0.25 | 0.09 |
| A_52_P378084 | XR_002675  | NA        | NA     | NA                                                       | -6.97 | 0.25 | 0.00 |
| A_51_P171052 | AK083039   | C530036F0 | 319355 | RIKEN cDNA C530036F05 gene                               | -2.85 | 0.25 | 0.95 |
| A_52_P145349 | NM_172656  | Stradb    | 227154 | STE20-related kinase adaptor beta                        | -4.68 | 0.25 | 0.06 |
| A_51_P458778 | NM_008278  | Hpgd      | 15446  | hydroxyprostaglandin dehydrogenase 15 (NAD)              | -5.28 | 0.25 | 0.00 |
| A_52_P644613 | NM_019878  | Sult1b1   | 56362  | sulfotransferase family 1B, member 1                     | -4.88 | 0.25 | 0.07 |
| A_51_P465292 | NM_080462  | Hnmt      | 140483 | histamine N-methyltransferase                            | -4.60 | 0.25 | 0.06 |
| A_51_P466180 | NM_010299  | Gm2a      | 14667  | GM2 ganglioside activator protein                        | -4.85 | 0.25 | 0.07 |
| A_51_P468231 | NM_011211  | Ptprd     | 19266  | protein tyrosine phosphatase, receptor type, D           | -4.38 | 0.25 | 0.09 |
| A_51_P337918 | NM_175438  | Aldh4a1   | 212647 | aldehyde dehydrogenase 4 family, member A1               | -4.20 | 0.25 | 0.11 |
| A_52_P303754 | AK050221   | 9130016M  | 71620  | RIKEN cDNA 9130016M20 gene                               | -3.94 | 0.25 | 0.14 |
| A_51_P218091 | NM_010195  | Lgr5      | 14160  | leucine rich repeat containing G protein coupled recepto | -3.28 | 0.25 | 0.42 |
| A_52_P330950 | NM_174847  | C2cd2     | 207781 | C2 calcium-dependent domain containing 2                 | -4.12 | 0.25 | 0.10 |
| A_51_P186703 | AK090129   | Fbln5     | 23876  | fibulin 5                                                | -5.02 | 0.25 | 0.00 |
| A_52_P579352 | NM_013584  | Lifr      | 16880  | leukemia inhibitory factor receptor                      | -4.55 | 0.25 | 0.05 |
| A_52_P674467 | NM_001039: | Lin7a     | 108030 | lin-7 homolog A (C. elegans)                             | -4.87 | 0.25 | 0.07 |
| A_51_P222566 | NM_025572  | 2610528J1 | 66451  | RIKEN cDNA 2610528J11 gene                               | -3.02 | 0.25 | 0.70 |
| A_52_P477785 | NM_177016  | Slc17a4   | 319848 | solute carrier family 17 (sodium phosphate), member 4    | -3.70 | 0.25 | 0.22 |
| A_51_P510031 | NM_053184  | Ugt2a1    | 94215  | UDP glucuronosyltransferase 2 family, polypeptide A1     | -5.53 | 0.25 | 0.00 |
| A_51_P479408 | NM_008317  | Hyal1     | 15586  | hyaluronoglucosaminidase 1                               | -2.96 | 0.25 | 0.76 |
| A_51_P129895 | NM_007744  | Comt1     | 12846  | catechol-O-methyltransferase 1                           | -3.44 | 0.25 | 0.35 |
| A_51_P194498 | NM_023395  | Wfdc1     | 67866  | WAP four-disulfide core domain 1                         | -6.93 | 0.25 | 0.00 |
| A_51_P163578 | NM_172881  | Ugt2b35   | 243085 | UDP glucuronosyltransferase 2 family, polypeptide B35    | -3.60 | 0.25 | 0.26 |
| A_52_P602987 | BC096586   | Prlr      | 19116  | prolactin receptor                                       | -3.35 | 0.24 | 0.38 |
| A_51_P445841 | NM_145470  | Depdc6    | 97998  | DEP domain containing 6                                  | -4.32 | 0.24 | 0.08 |
| A_51_P231072 | NM_053165  | Clec2h    | 94071  | C-type lectin domain family 2, member h                  | -3.67 | 0.24 | 0.23 |

|              |           |           |        |                                                         |       |      |      |
|--------------|-----------|-----------|--------|---------------------------------------------------------|-------|------|------|
| A_51_P334942 | NM_013467 | Aldh1a1   | 11668  | aldehyde dehydrogenase family 1, subfamily A1           | -4.22 | 0.24 | 0.12 |
| A_51_P383399 | NM_011921 | Aldh1a7   | 26358  | aldehyde dehydrogenase family 1, subfamily A7           | -3.90 | 0.24 | 0.14 |
| A_51_P348665 | NM_016894 | Ramp1     | 51801  | receptor (calcitonin) activity modifying protein 1      | -4.36 | 0.24 | 0.09 |
| A_51_P291713 | NM_134094 | Ncald     | 52589  | neurocalcin delta                                       | -4.28 | 0.24 | 0.08 |
| A_51_P145020 | NM_146245 | Lrit1     | 239037 | leucine-rich repeat, immunoglobulin-like and transmembr | -3.68 | 0.24 | 0.22 |
| A_51_P296737 | NM_027211 | Anxa13    | 69787  | annexin A13                                             | -3.99 | 0.24 | 0.12 |
| A_52_P402127 | BC093515  | NA        | NA     | NA                                                      | -5.16 | 0.24 | 0.00 |
| A_51_P150145 | AK077046  | NA        | NA     | NA                                                      | -3.51 | 0.24 | 0.30 |
| A_51_P322220 | NM_029752 | Bri3bp    | 76809  | Bri3 binding protein                                    | -3.79 | 0.24 | 0.17 |
| A_51_P157677 | NM_016798 | Pdlim3    | 53318  | PDZ and LIM domain 3                                    | -2.83 | 0.24 | 0.98 |
| A_52_P54106  | AK034547  | Ghr       | 14600  | growth hormone receptor                                 | -2.93 | 0.24 | 0.81 |
| A_51_P240287 | X51971    | Car5a     | 12352  | carbonic anhydrase 5a, mitochondrial                    | -3.68 | 0.24 | 0.22 |
| A_51_P490070 | NM_011727 | Xlr3c     | 22446  | X-linked lymphocyte-regulated 3C                        | -3.70 | 0.24 | 0.22 |
| A_52_P205695 | NM_027334 | Mettl7a1  | 70152  | methyltransferase like 7A1                              | -4.28 | 0.24 | 0.08 |
| A_51_P392928 | NM_138745 | Mthfd1    | 108156 | methylenetetrahydrofolate dehydrogenase (NADP+ depe     | -3.98 | 0.24 | 0.12 |
| A_51_P453909 | NM_007817 | Cyp2f2    | 13107  | cytochrome P450, family 2, subfamily f, polypeptide 2   | -5.23 | 0.24 | 0.00 |
| A_51_P288341 | NM_008277 | Hpd       | 15445  | 4-hydroxyphenylpyruvic acid dioxygenase                 | -3.71 | 0.24 | 0.20 |
| A_52_P817975 | BY711602  | NA        | NA     | NA                                                      | -4.03 | 0.24 | 0.13 |
| A_51_P326529 | NM_181277 | Col14a1   | 12818  | collagen, type XIV, alpha 1                             | -6.65 | 0.24 | 0.00 |
| A_52_P590154 | NM_013786 | Hsd17b6   | 27400  | hydroxysteroid (17-beta) dehydrogenase 6                | -4.17 | 0.23 | 0.11 |
| A_52_P219904 | NM_027827 | Afmid     | 71562  | arylformamidase                                         | -3.98 | 0.23 | 0.12 |
| A_52_P407171 | NM_175391 | Apol7c    | 108956 | apolipoprotein L 7c                                     | -4.68 | 0.23 | 0.06 |
| A_51_P468482 | NM_028093 | Entpd8    | 72090  | ectonucleoside triphosphate diphosphohydrolase 8        | -4.27 | 0.23 | 0.08 |
| A_51_P157462 | NM_009060 | Rgn       | 19733  | regucalcin                                              | -5.71 | 0.23 | 0.00 |
| A_51_P268929 | AK050061  | NA        | NA     | NA                                                      | -3.76 | 0.23 | 0.19 |
| A_52_P40293  | NM_013547 | Hgd       | 15233  | homogentisate 1, 2-dioxygenase                          | -4.24 | 0.23 | 0.08 |
| A_51_P467971 | NM_146005 | Ank3      | 11735  | ankyrin 3, epithelial                                   | -3.52 | 0.23 | 0.28 |
| A_52_P350750 | NM_015730 | Chrna4    | 11438  | cholinergic receptor, nicotinic, alpha polypeptide 4    | -3.98 | 0.23 | 0.12 |
| A_51_P141535 | NM_016978 | Oat       | 18242  | ornithine aminotransferase                              | -5.48 | 0.23 | 0.00 |
| A_52_P245962 | NM_021456 | Ces1      | 12623  | carboxylesterase 1                                      | -5.19 | 0.23 | 0.00 |
| A_51_P142046 | NM_025560 | 1810049H1 | 166431 | RIKEN cDNA 1810049H13 gene                              | -5.82 | 0.23 | 0.00 |
| A_51_P506513 | NM_024236 | Qdpr      | 110391 | quinoid dihydropteridine reductase                      | -4.38 | 0.23 | 0.09 |
| A_51_P404193 | NM_022435 | Sp5       | 64406  | trans-acting transcription factor 5                     | -3.49 | 0.23 | 0.31 |
| A_52_P415215 | NM_010358 | Gstm1     | 14862  | glutathione S-transferase, mu 1                         | -5.56 | 0.23 | 0.00 |

|              |           |            |        |                                                               |       |      |      |
|--------------|-----------|------------|--------|---------------------------------------------------------------|-------|------|------|
| A_52_P42242  | NM_139297 | Ugp2       | 216558 | UDP-glucose pyrophosphorylase 2                               | -6.36 | 0.23 | 0.00 |
| A_51_P358112 | NM_146094 | Fads1      | 76267  | fatty acid desaturase 1                                       | -3.97 | 0.23 | 0.15 |
| A_51_P155638 | NM_027987 | Cd300lg    | 52685  | CD300 antigen like family member G                            | -4.16 | 0.23 | 0.11 |
| A_51_P309917 | NM_001001 | Itga8      | 241226 | integrin alpha 8                                              | -6.17 | 0.23 | 0.00 |
| A_52_P673499 | NM_009171 | Shmt1      | 20425  | serine hydroxymethyltransferase 1 (soluble)                   | -4.04 | 0.23 | 0.13 |
| A_52_P595871 | NM_009993 | Cyp1a2     | 13077  | cytochrome P450, family 1, subfamily a, polypeptide 2         | -5.44 | 0.23 | 0.00 |
| A_51_P386660 | NM_010173 | Faah       | 14073  | fatty acid amide hydrolase                                    | -4.62 | 0.23 | 0.06 |
| A_52_P517683 | NM_011526 | Tagln      | 21345  | transgelin                                                    | -4.59 | 0.23 | 0.06 |
| A_51_P365369 | NM_011261 | Reln       | 19699  | reelin                                                        | -7.46 | 0.23 | 0.00 |
| A_51_P112223 | NM_010357 | Gsta4      | 14860  | glutathione S-transferase, alpha 4                            | -9.60 | 0.22 | 0.00 |
| A_51_P138933 | NM_177741 | Ppp1r3b    | 244416 | protein phosphatase 1, regulatory (inhibitor) subunit 3B      | -4.88 | 0.22 | 0.07 |
| A_51_P179878 | AK134698  | Slc1a2     | 20511  | solute carrier family 1 (glial high affinity glutamate transp | -4.65 | 0.22 | 0.06 |
| A_51_P432924 | NM_153598 | Ugt2b34    | 100727 | UDP glucuronosyltransferase 2 family, polypeptide B34         | -3.60 | 0.22 | 0.26 |
| A_51_P249909 | NM_010702 | Lect2      | 16841  | leukocyte cell-derived chemotaxin 2                           | -4.67 | 0.22 | 0.06 |
| A_52_P415996 | NM_008184 | Gstm6      | 14867  | glutathione S-transferase, mu 6                               | -5.35 | 0.22 | 0.00 |
| A_51_P447785 | NM_028089 | Cyp2c55    | 72082  | cytochrome P450, family 2, subfamily c, polypeptide 55        | -4.09 | 0.22 | 0.10 |
| A_52_P685021 | NM_021704 | Cxcl12     | 20315  | chemokine (C-X-C motif) ligand 12                             | -3.45 | 0.22 | 0.33 |
| A_51_P455090 | AK028683  | Cps1       | 227231 | carbamoyl-phosphate synthetase 1                              | -4.85 | 0.22 | 0.07 |
| A_52_P282279 | NM_138745 | Mthfd1     | 108156 | methylenetetrahydrofolate dehydrogenase (NADP+ depe           | -4.41 | 0.22 | 0.09 |
| A_51_P116039 | NM_008256 | Hmgcs2     | 15360  | 3-hydroxy-3-methylglutaryl-Coenzyme A synthase 2              | -3.76 | 0.22 | 0.19 |
| A_51_P497724 | NM_029419 | Apol7a     | 75761  | apolipoprotein L 7a                                           | -4.63 | 0.22 | 0.06 |
| A_51_P389988 | NM_016917 | Slc40a1    | 53945  | solute carrier family 40 (iron-regulated transporter), men    | -3.25 | 0.22 | 0.46 |
| A_52_P659312 | NM_145134 | Spsb4      | 211949 | splA/ryanodine receptor domain and SOCS box containin         | -3.01 | 0.22 | 0.70 |
| A_51_P369784 | NM_133660 | Es22       | 13897  | esterase 22                                                   | -6.65 | 0.22 | 0.00 |
| A_52_P624969 | NA        | NA         | NA     | NA                                                            | -3.85 | 0.22 | 0.16 |
| A_51_P491835 | AK013507  | 2900009J2i | 72876  | RIKEN cDNA 2900009J20 gene                                    | -4.49 | 0.22 | 0.05 |
| A_52_P84415  | NM_145993 | L3mbtl2    | 214669 | l(3)mbt-like 2 (Drosophila)                                   | -3.08 | 0.22 | 0.62 |
| A_51_P480427 | NM_146718 | Olf430     | 258713 | olfactory receptor 430                                        | -5.65 | 0.22 | 0.00 |
| A_51_P464394 | NM_031180 | Klb        | 83379  | klotho beta                                                   | -3.53 | 0.22 | 0.29 |
| A_51_P469789 | NM_016702 | Agxt       | 11611  | alanine-glyoxylate aminotransferase                           | -5.54 | 0.22 | 0.00 |
| A_51_P439248 | NM_008625 | Mrc1       | 17533  | mannose receptor, C type 1                                    | -4.84 | 0.22 | 0.07 |
| A_51_P165111 | NM_013797 | Slco1a1    | 28248  | solute carrier organic anion transporter family, member :     | -4.57 | 0.22 | 0.06 |
| A_51_P206551 | NM_019878 | Sult1b1    | 56362  | sulfotransferase family 1B, member 1                          | -5.43 | 0.21 | 0.00 |
| A_51_P328622 | NM_027249 | Tlcd2      | 380712 | TLC domain containing 2                                       | -4.64 | 0.21 | 0.06 |

|              |           |          |        |                                                              |       |      |      |
|--------------|-----------|----------|--------|--------------------------------------------------------------|-------|------|------|
| A_51_P338413 | NM_019992 | Stap1    | 56792  | signal transducing adaptor family member 1                   | -3.45 | 0.21 | 0.33 |
| A_51_P450140 | NM_009993 | Cyp1a2   | 13077  | cytochrome P450, family 1, subfamily a, polypeptide 2        | -5.60 | 0.21 | 0.00 |
| A_51_P499854 | NM_010284 | Ghr      | 14600  | growth hormone receptor                                      | -5.23 | 0.21 | 0.00 |
| A_52_P360742 | NM_029419 | Apol7a   | 75761  | apolipoprotein L 7a                                          | -5.80 | 0.21 | 0.00 |
| A_51_P117618 | NM_023154 | Ethe1    | 66071  | ethylmalonic encephalopathy 1                                | -4.41 | 0.21 | 0.09 |
| A_51_P335000 | NM_001077 | Fhl1     | 14199  | four and a half LIM domains 1                                | -3.01 | 0.21 | 0.70 |
| A_51_P333111 | NM_009676 | Aox1     | 11761  | aldehyde oxidase 1                                           | -5.02 | 0.21 | 0.00 |
| A_51_P512172 | AK010953  | Tet1     | 52463  | tet oncogene 1                                               | -5.81 | 0.21 | 0.00 |
| A_51_P136337 | NM_176963 | Galm     | 319625 | galactose mutarotase                                         | -5.31 | 0.21 | 0.00 |
| A_51_P363905 | NM_025877 | Slc25a23 | 66972  | solute carrier family 25 (mitochondrial carrier; phosphate   | -3.96 | 0.21 | 0.15 |
| A_51_P179664 | NM_008185 | Gstt1    | 14871  | glutathione S-transferase, theta 1                           | -6.46 | 0.21 | 0.00 |
| A_51_P231042 | NM_053094 | Cd163    | 93671  | CD163 antigen                                                | -3.81 | 0.21 | 0.18 |
| A_51_P180213 | NM_001013 | Akr1c19  | 432720 | aldo-keto reductase family 1, member C19                     | -6.10 | 0.21 | 0.00 |
| A_51_P395856 | NM_144856 | Slc22a7  | 108114 | solute carrier family 22 (organic anion transporter), mem    | -4.85 | 0.21 | 0.07 |
| A_52_P625118 | NM_007592 | Car8     | 12319  | carbonic anhydrase 8                                         | -4.47 | 0.21 | 0.05 |
| A_52_P361391 | NM_146640 | Olfr1153 | 258633 | olfactory receptor 1153                                      | -4.56 | 0.21 | 0.05 |
| A_52_P448006 | NM_023175 | Nit2     | 52633  | nitrilase family, member 2                                   | -4.53 | 0.21 | 0.05 |
| A_51_P463791 | BC051947  | Srrm3    | 58212  | serine/arginine repetitive matrix 3                          | -3.39 | 0.21 | 0.36 |
| A_52_P240796 | NM_009040 | Rdh16    | 19683  | retinol dehydrogenase 16                                     | -6.42 | 0.21 | 0.00 |
| A_52_P682382 | NM_009127 | Scd1     | 20249  | stearoyl-Coenzyme A desaturase 1                             | -3.76 | 0.21 | 0.19 |
| A_51_P341918 | NM_009366 | Tsc22d1  | 21807  | TSC22 domain family, member 1                                | -3.09 | 0.20 | 0.62 |
| A_52_P670188 | NM_027301 | Sdr9c7   | 70061  | 4short chain dehydrogenase/reductase family 9C, memb         | -3.37 | 0.20 | 0.37 |
| A_51_P470935 | NM_027208 | Bdh2     | 69772  | 3-hydroxybutyrate dehydrogenase, type 2                      | -5.65 | 0.20 | 0.00 |
| A_51_P239177 | NM_175391 | Apol7c   | 108956 | apolipoprotein L 7c                                          | -4.89 | 0.20 | 0.08 |
| A_51_P131315 | NM_027997 | Serpina9 | 71907  | serine (or cysteine) peptidase inhibitor, clade A (alpha-1 ; | -3.50 | 0.20 | 0.31 |
| A_51_P475378 | NM_024208 | Echdc3   | 67856  | enoyl Coenzyme A hydratase domain containing 3               | -4.46 | 0.20 | 0.05 |
| A_51_P468005 | NM_010232 | Fmo5     | 14263  | flavin containing monooxygenase 5                            | -4.12 | 0.20 | 0.10 |
| A_52_P509297 | NM_001038 | Mapt     | 17762  | microtubule-associated protein tau                           | -4.75 | 0.20 | 0.07 |
| A_51_P263591 | NM_023792 | Pank1    | 75735  | pantothenate kinase 1                                        | -4.79 | 0.20 | 0.07 |
| A_51_P136303 | NM_134127 | Cyp4f15  | 106648 | cytochrome P450, family 4, subfamily f, polypeptide 15       | -4.73 | 0.20 | 0.06 |
| A_51_P482051 | NM_007820 | Cyp3a16  | 13114  | cytochrome P450, family 3, subfamily a, polypeptide 16       | -5.45 | 0.20 | 0.00 |
| A_52_P625249 | NM_010001 | Cyp2c37  | 13096  | cytochrome P450, family 2. subfamily c, polypeptide 37       | -4.31 | 0.20 | 0.08 |
| A_51_P140803 | NM_178235 | Slco1b2  | 28253  | solute carrier organic anion transporter family, member :    | -4.46 | 0.20 | 0.05 |
| A_51_P238094 | NM_024444 | Cyp4f18  | 72054  | cytochrome P450, family 4, subfamily f, polypeptide 18       | -4.99 | 0.20 | 0.00 |

|              |           |           |        |                                                         |       |      |      |
|--------------|-----------|-----------|--------|---------------------------------------------------------|-------|------|------|
| A_51_P355301 | NM_007818 | Cyp3a11   | 13112  | cytochrome P450, family 3, subfamily a, polypeptide 11  | -4.88 | 0.20 | 0.08 |
| A_52_P508991 | NM_010231 | Fmo1      | 14261  | flavin containing monooxygenase 1                       | -3.72 | 0.20 | 0.21 |
| A_51_P338262 | NM_011619 | Tnnt2     | 21956  | troponin T2, cardiac                                    | -2.99 | 0.20 | 0.72 |
| A_51_P253481 | NM_021456 | Ces1      | 12623  | carboxylesterase 1                                      | -5.46 | 0.19 | 0.00 |
| A_51_P399305 | NM_013869 | Tnfrsf19  | 29820  | tumor necrosis factor receptor superfamily, member 19   | -4.47 | 0.19 | 0.05 |
| A_51_P360918 | NM_020578 | Ehd3      | 57440  | EH-domain containing 3                                  | -4.09 | 0.19 | 0.10 |
| A_51_P464175 | NM_007437 | Aldh3a2   | 11671  | aldehyde dehydrogenase family 3, subfamily A2           | -5.52 | 0.19 | 0.00 |
| A_51_P305138 | NA        | NA        | NA     | NA                                                      | -7.16 | 0.19 | 0.00 |
| A_52_P241619 | NM_026085 | 3110049J2 | 67307  | RIKEN cDNA 3110049J23 gene                              | -4.18 | 0.19 | 0.11 |
| A_51_P124550 | NM_139292 | Reep6     | 70335  | receptor accessory protein 6                            | -4.09 | 0.19 | 0.10 |
| A_52_P69558  | XM_001003 | NA        | NA     | NA                                                      | -5.51 | 0.19 | 0.00 |
| A_52_P608474 | BC027582  | LOC269472 | 269472 | hypothetical LOC269472                                  | -6.89 | 0.19 | 0.00 |
| A_51_P389539 | NM_054053 | Gpr98     | 110789 | G protein-coupled receptor 98                           | -4.75 | 0.19 | 0.07 |
| A_51_P331003 | NM_011976 | Sema4g    | 26456  | sema domain, immunoglobulin domain (Ig), transmembr     | -4.38 | 0.19 | 0.09 |
| A_51_P406165 | NM_030069 | Fam55b    | 78252  | family with sequence similarity 55, member B            | -4.58 | 0.18 | 0.06 |
| A_52_P320193 | NM_053165 | Clec2h    | 94071  | C-type lectin domain family 2, member h                 | -3.93 | 0.18 | 0.14 |
| A_51_P431737 | NM_145953 | Cth       | 107869 | cystathionase (cystathionine gamma-lyase)               | -4.52 | 0.18 | 0.05 |
| A_51_P168133 | NM_022026 | Aqp9      | 64008  | aquaporin 9                                             | -4.91 | 0.18 | 0.08 |
| A_52_P941407 | AV094648  | NA        | NA     | NA                                                      | -6.71 | 0.18 | 0.00 |
| A_52_P154580 | NM_206537 | Cyp2c54   | 404195 | cytochrome P450, family 2, subfamily c, polypeptide 54  | -4.30 | 0.18 | 0.08 |
| A_51_P341203 | NM_017396 | Cyp3a41a  | 53973  | cytochrome P450, family 3, subfamily a, polypeptide 41A | -6.13 | 0.18 | 0.00 |
| A_52_P629748 | NM_175263 | Notum     | 77583  | notum pectinacylesterase homolog (Drosophila)           | -4.08 | 0.18 | 0.10 |
| A_51_P451574 | NM_012006 | Acot1     | 26897  | acyl-CoA thioesterase 1                                 | -5.69 | 0.18 | 0.00 |
| A_52_P432124 | NM_001077 | Gsta3     | 14859  | glutathione S-transferase, alpha 3                      | -4.72 | 0.18 | 0.06 |
| A_52_P571006 | NM_177380 | Cyp3a44   | 337924 | cytochrome P450, family 3, subfamily a, polypeptide 44  | -4.78 | 0.18 | 0.07 |
| A_51_P271865 | NM_016751 | Clec4f    | 51811  | C-type lectin domain family 4, member f                 | -6.54 | 0.18 | 0.00 |
| A_52_P460767 | NM_010232 | Fmo5      | 14263  | flavin containing monooxygenase 5                       | -4.39 | 0.18 | 0.09 |
| A_52_P80440  | NM_022026 | Aqp9      | 64008  | aquaporin 9                                             | -4.90 | 0.18 | 0.08 |
| A_51_P120027 | AK004863  | Adh6-ps1  | 71749  | alcohol dehydrogenase 6 (class V), pseudogene 1         | -3.42 | 0.18 | 0.34 |
| A_52_P54280  | NM_023341 | Cabc1     | 67426  | chaperone, ABC1 activity of bc1 complex like (S. pombe) | -3.51 | 0.18 | 0.29 |
| A_51_P244950 | AK004822  | Dpys      | 64705  | dihydropyrimidinase                                     | -4.66 | 0.18 | 0.06 |
| A_51_P175424 | NM_011797 | Car14     | 23831  | carbonic anhydrase 14                                   | -5.00 | 0.18 | 0.00 |
| A_51_P110471 | NM_026993 | Ddah1     | 69219  | dimethylarginine dimethylaminohydrolase 1               | -5.49 | 0.18 | 0.00 |
| A_51_P186547 | NM_008777 | Pah       | 18478  | phenylalanine hydroxylase                               | -4.37 | 0.17 | 0.09 |

|              |           |                 |        |                                                            |       |      |      |
|--------------|-----------|-----------------|--------|------------------------------------------------------------|-------|------|------|
| A_51_P377154 | NM_009997 | Cyp2a4          | 13086  | cytochrome P450, family 2, subfamily a, polypeptide 4      | -4.30 | 0.17 | 0.08 |
| A_51_P165451 | NM_026085 | 3110049J2:67307 |        | RIKEN cDNA 3110049J23 gene                                 | -4.38 | 0.17 | 0.09 |
| A_52_P679769 | NM_009804 | Cat             | 12359  | catalase                                                   | -4.75 | 0.17 | 0.07 |
| A_51_P229655 | XM_001002 | NA              | NA     | NA                                                         | -5.36 | 0.17 | 0.00 |
| A_51_P106294 | NM_010292 | Gck             | 103988 | glucokinase                                                | -4.85 | 0.17 | 0.07 |
| A_51_P309920 | NM_001001 | Itga8           | 241226 | integrin alpha 8                                           | -6.06 | 0.17 | 0.00 |
| A_51_P290981 | NM_007824 | Cyp7a1          | 13122  | cytochrome P450, family 7, subfamily a, polypeptide 1      | -4.90 | 0.17 | 0.08 |
| A_51_P103144 | AY195869  | Slco1a1         | 28248  | solute carrier organic anion transporter family, member :  | -6.09 | 0.17 | 0.00 |
| A_52_P614777 | NM_032400 | Sucnr1          | 84112  | succinate receptor 1                                       | -3.03 | 0.17 | 0.68 |
| A_52_P69109  | NM_011387 | Slc10a1         | 20493  | solute carrier family 10 (sodium/bile acid cotransporter f | -4.22 | 0.17 | 0.10 |
| A_52_P9703   | NM_009997 | Cyp2a4          | 13086  | cytochrome P450, family 2, subfamily a, polypeptide 4      | -5.00 | 0.17 | 0.00 |
| A_51_P221651 | NM_023341 | Cabc1           | 67426  | chaperone, ABC1 activity of bc1 complex like (S. pombe)    | -3.46 | 0.16 | 0.33 |
| A_51_P379373 | NM_145381 | Lactb2          | 212442 | lactamase, beta 2                                          | -6.09 | 0.16 | 0.00 |
| A_51_P270083 | NM_029631 | Abhd14b         | 76491  | abhydrolase domain containing 14b                          | -4.97 | 0.16 | 0.00 |
| A_52_P611787 | NM_026183 | Slc47a1         | 67473  | solute carrier family 47, member 1                         | -4.84 | 0.16 | 0.07 |
| A_52_P458682 | NM_008182 | Gsta2           | 14858  | glutathione S-transferase, alpha 2 (Yc2)                   | -8.74 | 0.16 | 0.00 |
| A_52_P239752 | AK077971  | Ttc39c          | 72747  | tetratricopeptide repeat domain 39C                        | -6.29 | 0.16 | 0.00 |
| A_52_P277654 | AK165090  | Pdk1            | 228026 | pyruvate dehydrogenase kinase, isoenzyme 1                 | -5.33 | 0.16 | 0.00 |
| A_52_P459818 | NM_001012 | Hsd3b3          | 15494  | hydroxy-delta-5-steroid dehydrogenase, 3 beta- and steri   | -4.79 | 0.16 | 0.07 |
| A_51_P304109 | NM_010003 | Cyp2c39         | 13098  | cytochrome P450, family 2, subfamily c, polypeptide 39     | -5.49 | 0.16 | 0.00 |
| A_51_P307168 | BC060266  | NA              | NA     | NA                                                         | -5.62 | 0.16 | 0.00 |
| A_52_P246255 | NM_009997 | Cyp2a4          | 13086  | cytochrome P450, family 2, subfamily a, polypeptide 4      | -5.26 | 0.16 | 0.00 |
| A_52_P470560 | NM_022722 | Dpys            | 64705  | dihydropyrimidinase                                        | -4.91 | 0.15 | 0.08 |
| A_51_P453043 | NM_030210 | Aacs            | 78894  | acetoacetyl-CoA synthetase                                 | -4.91 | 0.15 | 0.08 |
| A_51_P305140 | NM_008181 | Gsta1           | 14857  | glutathione S-transferase, alpha 1 (Ya)                    | -4.85 | 0.15 | 0.07 |
| A_51_P142450 | NM_027865 | Tmem25          | 71687  | transmembrane protein 25                                   | -3.84 | 0.15 | 0.18 |
| A_52_P246252 | NM_007812 | Cyp2a5          | 13087  | cytochrome P450, family 2, subfamily a, polypeptide 5      | -4.63 | 0.15 | 0.06 |
| A_51_P521010 | NM_016854 | Ppp1r3c         | 53412  | protein phosphatase 1, regulatory (inhibitor) subunit 3C   | -3.34 | 0.15 | 0.40 |
| A_51_P335569 | NM_030687 | Slco1a4         | 28250  | solute carrier organic anion transporter family, member :  | -5.75 | 0.15 | 0.00 |
| A_51_P502092 | BC024137  | BC024137        | 234757 | cDNA sequence BC024137                                     | -4.66 | 0.15 | 0.06 |
| A_51_P189082 | NM_030611 | Akr1c6          | 83702  | aldo-keto reductase family 1, member C6                    | -4.28 | 0.15 | 0.08 |
| A_51_P245503 | NM_152811 | Ugt2b1          | 71773  | UDP glucuronosyltransferase 2 family, polypeptide B1       | -5.76 | 0.15 | 0.00 |
| A_51_P382764 | BC021607  | Akr1c20         | 116852 | aldo-keto reductase family 1, member C20                   | -4.25 | 0.15 | 0.08 |
| A_51_P511927 | NM_026183 | Slc47a1         | 67473  | solute carrier family 47, member 1                         | -5.30 | 0.15 | 0.00 |

|               |           |           |        |                                                          |       |      |      |
|---------------|-----------|-----------|--------|----------------------------------------------------------|-------|------|------|
| A_51_P273596  | NM_146126 | Sord      | 20322  | sorbitol dehydrogenase                                   | -4.38 | 0.15 | 0.09 |
| A_51_P205779  | NM_009690 | Cd5l      | 11801  | CD5 antigen-like                                         | -4.78 | 0.15 | 0.07 |
| A_51_P189733  | NM_175250 | 2810007J2 | 76971  | RIKEN cDNA 2810007J24 gene                               | -5.74 | 0.15 | 0.00 |
| A_51_P489367  | NM_019792 | Cyp3a25   | 56388  | cytochrome P450, family 3, subfamily a, polypeptide 25   | -4.51 | 0.14 | 0.05 |
| A_52_P515677  | AK050325  | NA        | NA     | NA                                                       | -4.09 | 0.14 | 0.10 |
| A_52_P531610  | AK030395  | Agxt2l1   | 71760  | alanine-glyoxylate aminotransferase 2-like 1             | -3.48 | 0.14 | 0.32 |
| A_52_P339759  | NM_153193 | Hsd3b2    | 15493  | hydroxy-delta-5-steroid dehydrogenase, 3 beta- and ster  | -4.58 | 0.14 | 0.06 |
| A_52_P136092  | NM_022026 | Aqp9      | 64008  | aquaporin 9                                              | -4.26 | 0.14 | 0.08 |
| A_51_P178772  | NM_144930 | AU018778  | 234564 | expressed sequence AU018778                              | -5.28 | 0.14 | 0.00 |
| A_51_P224801  | NM_008455 | Klkb1     | 16621  | kallikrein B, plasma 1                                   | -4.98 | 0.14 | 0.00 |
| A_52_P259537  | NM_010292 | Gck       | 103988 | glucokinase                                              | -4.08 | 0.14 | 0.10 |
| A_51_P452768  | NM_022434 | Cyp4f14   | 64385  | cytochrome P450, family 4, subfamily f, polypeptide 14   | -5.80 | 0.14 | 0.00 |
| A_51_P148612  | NM_009944 | Cox7a1    | 12865  | cytochrome c oxidase, subunit VIIa 1                     | -2.87 | 0.14 | 0.91 |
| A_52_P1147453 | AK137645  | Fmo5      | 14263  | flavin containing monooxygenase 5                        | -5.32 | 0.14 | 0.00 |
| A_52_P163021  | NM_182959 | Slc17a8   | 216227 | solute carrier family 17 (sodium-dependent inorganic ph  | -4.54 | 0.14 | 0.05 |
| A_51_P128834  | NM_177789 | Vsig4     | 278180 | V-set and immunoglobulin domain containing 4             | -4.84 | 0.13 | 0.07 |
| A_52_P380314  | NM_019792 | Cyp3a25   | 56388  | cytochrome P450, family 3, subfamily a, polypeptide 25   | -4.70 | 0.13 | 0.06 |
| A_52_P156806  | NM_201644 | Ugt1a9    | 394434 | UDP glucuronosyltransferase 1 family, polypeptide A9     | -7.04 | 0.13 | 0.00 |
| A_51_P144160  | NM_173422 | Colec10   | 239447 | collectin sub-family member 10                           | -6.88 | 0.13 | 0.00 |
| A_51_P489503  | BC025832  | Notum     | 77583  | notum pectinacylesterase homolog (Drosophila)            | -7.89 | 0.13 | 0.00 |
| A_52_P21486   | NM_183257 | Hamp2     | 66438  | hepcidin antimicrobial peptide 2                         | -5.96 | 0.13 | 0.00 |
| A_51_P308844  | NM_153529 | Nrn1      | 68404  | neuritin 1                                               | -5.32 | 0.13 | 0.00 |
| A_51_P309338  | NM_021022 | Abcb11    | 27413  | ATP-binding cassette, sub-family B (MDR/TAP), member     | -5.34 | 0.12 | 0.00 |
| A_52_P425499  | XM_001006 | NA        | NA     | NA                                                       | -5.59 | 0.12 | 0.00 |
| A_52_P420504  | NM_007392 | Acta2     | 11475  | actin, alpha 2, smooth muscle, aorta                     | -2.84 | 0.12 | 0.96 |
| A_52_P30451   | NM_016854 | Ppp1r3c   | 53412  | protein phosphatase 1, regulatory (inhibitor) subunit 3C | -3.35 | 0.12 | 0.38 |
| A_51_P162162  | NM_009349 | Inmt      | 21743  | indolethylamine N-methyltransferase                      | -5.58 | 0.12 | 0.00 |
| A_51_P492153  | NM_029550 | Keg1      | 64697  | kidney expressed gene 1                                  | -4.82 | 0.11 | 0.07 |
| A_52_P319199  | NM_145154 | Angptl6   | 70726  | angiopoietin-like 6                                      | -7.23 | 0.11 | 0.00 |
| A_52_P67637   | AK080673  | Sc5d      | 235293 | sterol-C5-desaturase (fungal ERG3, delta-5-desaturase) h | -3.73 | 0.11 | 0.21 |
| A_51_P308298  | BC055439  | Myl9      | 98932  | myosin, light polypeptide 9, regulatory                  | -3.90 | 0.11 | 0.14 |
| A_51_P174275  | NM_027866 | Colec11   | 71693  | collectin sub-family member 11                           | -6.35 | 0.10 | 0.00 |
| A_52_P84027   | NM_007824 | Cyp7a1    | 13122  | cytochrome P450, family 7, subfamily a, polypeptide 1    | -4.05 | 0.10 | 0.13 |
| A_51_P226567  | NM_153193 | Hsd3b2    | 15493  | hydroxy-delta-5-steroid dehydrogenase, 3 beta- and ster  | -4.87 | 0.10 | 0.07 |

|              |           |                 |        |                                                              |       |      |      |
|--------------|-----------|-----------------|--------|--------------------------------------------------------------|-------|------|------|
| A_52_P653825 | NM_029550 | Keg1            | 64697  | kidney expressed gene 1                                      | -5.06 | 0.10 | 0.00 |
| A_52_P595463 | NM_177002 | C730048C1319800 |        | RIKEN cDNA C730048C13 gene                                   | -5.57 | 0.10 | 0.00 |
| A_51_P284177 | NM_134072 | Akr1c14         | 105387 | aldo-keto reductase family 1, member C14                     | -5.44 | 0.10 | 0.00 |
| A_51_P463440 | NM_130450 | Elovl6          | 170439 | ELOVL family member 6, elongation of long chain fatty ac     | -7.15 | 0.09 | 0.00 |
| A_52_P16752  | NM_023617 | Aox3            | 71724  | aldehyde oxidase 3                                           | -4.78 | 0.09 | 0.07 |
| A_52_P468564 | NM_010002 | Cyp2c38         | 13097  | cytochrome P450, family 2, subfamily c, polypeptide 38       | -2.97 | 0.09 | 0.75 |
| A_52_P595455 | NM_001013 | Gm5631          | 434674 | predicted gene 5631                                          | -5.85 | 0.09 | 0.00 |
| A_51_P324633 | NM_007703 | Elovl3          | 12686  | elongation of very long chain fatty acids (FEN1/Elo2, SUR    | -3.34 | 0.09 | 0.40 |
| A_51_P379385 | NM_153145 | Abca8a          | 217258 | ATP-binding cassette, sub-family A (ABC1), member 8a         | -6.58 | 0.09 | 0.00 |
| A_51_P259571 | NM_145154 | Angptl6         | 70726  | angiopoietin-like 6                                          | -7.67 | 0.09 | 0.00 |
| A_51_P391616 | NM_027907 | Agxt2l1         | 71760  | alanine-glyoxylate aminotransferase 2-like 1                 | -5.39 | 0.08 | 0.00 |
| A_51_P488399 | NM_019811 | Acss2           | 60525  | acyl-CoA synthetase short-chain family member 2              | -4.68 | 0.08 | 0.06 |
| A_51_P431329 | NM_007606 | Car3            | 12350  | carbonic anhydrase 3                                         | -6.34 | 0.08 | 0.00 |
| A_51_P185693 | NM_031197 | Slc2a2          | 20526  | solute carrier family 2 (facilitated glucose transporter), m | -5.99 | 0.08 | 0.00 |
| A_51_P420415 | NM_175283 | Srd5a1          | 78925  | steroid 5 alpha-reductase 1                                  | -6.06 | 0.08 | 0.00 |
| A_52_P409988 | NM_031197 | Slc2a2          | 20526  | solute carrier family 2 (facilitated glucose transporter), m | -6.67 | 0.07 | 0.00 |
| A_51_P145662 | NM_029465 | Clec4g          | 75863  | C-type lectin domain family 4, member g                      | -5.84 | 0.07 | 0.00 |
| A_52_P566718 | NM_019811 | Acss2           | 60525  | acyl-CoA synthetase short-chain family member 2              | -4.97 | 0.07 | 0.00 |
| A_51_P352005 | NM_008294 | Hsd3b4          | 15495  | hydroxy-delta-5-steroid dehydrogenase, 3 beta- and ster      | -5.26 | 0.06 | 0.00 |
| A_51_P496162 | NM_008295 | Hsd3b5          | 15496  | hydroxy-delta-5-steroid dehydrogenase, 3 beta- and ster      | -5.02 | 0.05 | 0.00 |
| A_52_P639461 | AK075630  | Car3            | 12350  | carbonic anhydrase 3                                         | -4.05 | 0.05 | 0.13 |
| A_51_P350817 | NM_009922 | Cnn1            | 12797  | calponin 1                                                   | -2.85 | 0.05 | 0.95 |
